# Supplementary material for: A proline-rich motif on VGLUT1 reduces synaptic vesicle super-pool and spontaneous release frequency
Source: eLife journal article supplement (doi:10.7554/elife.50401), 2019-10-30
Supplement: supp [file elife-50401-supp-v1.zip]

Archive with 27 entries (27 files):
- elife_poa_e50401_Figure_3_source_data_1.xlsx
- elife_poa_e50401_Figure_4_source_data_8.xlsx
- elife_poa_e50401_Supplementary_file_1.docx
- elife_poa_e50401_Figure_4_source_data_9.xlsx
- elife_poa_e50401_Figure_4_figure_supplement_2_source_data_1.xlsx
- elife_poa_e50401_Figure_1_source_data_2.xlsx
- elife_poa_e50401_Figure_1_figure_supplement_1.tif
- elife_poa_e50401_Figure_4_figure_supplement_2.tif
- elife_poa_e50401_Figure_5_figure_supplement_1.tif
- elife_poa_e50401_Figure_4_source_data_2.xlsx
- elife_poa_e50401_Figure_4_source_data_6.xlsx
- elife_poa_e50401_Supplementary_file_2.xlsx
- elife_poa_e50401_Figure_4_source_data_1.xlsx
- elife_poa_e50401_Figure_5_source_data_1.xlsx
- elife_poa_e50401_Figure_2_source_data_1.xlsx
- elife_poa_e50401_Figure_3_figure_supplement_2.tif
- elife_poa_e50401_Figure_4_source_data_3.xlsx
- elife_poa_e50401_Figure_4_figure_supplement_1.tif
- elife_poa_e50401_Figure_1_source_data_1.xlsx
- elife_poa_e50401_Figure_4_source_data_7.xlsx
- elife_poa_e50401_Transparent_Reporting_File.pdf
- elife_poa_e50401_Figure_4_source_data_4.xlsx
- elife_poa_e50401_Figure_3_figure_supplement_1.tif
- elife_poa_e50401_Figure_3_figure_supplement_1_source_data_1.xlsx
- elife_poa_e50401_Figure_3_source_data_2.xlsx
- elife_poa_e50401_Figure_1_figure_supplement_1_source_data_1.xlsx
- elife_poa_e50401_Figure_4_source_data_5.xlsx
