# Supplementary material for: A proline-rich motif on VGLUT1 reduces synaptic vesicle super-pool and spontaneous release frequency
Source: eLife journal article supplement (doi:10.7554/elife.50401), 2019-10-30
Supplement: supp [file elife-50401-supp-v1.zip › elife_poa_e50401_Figure_1_figure_supplement_1_source_data_1.xlsx]

## Sheet: VG1 20Feb F1
time	b1	b2	b3	b4	b5	background	c1	c2	c3	c4	c5	c6	c7	c8
0	460344	250625	285849	359042	197312	17293	468291	172056	167479	200292	327501	124180	413060	235518
30	445205	244419	283567	348868	231113	17497	458831	153831	174801	206218	282438	111657	392416	213675
60	433899	249120	283756	323805	167562	17672	456492	145407	165370	210973	317511	126180	351046	229341
90	441064	246140	261614	286388	173482	18134	472535	134505	167113	210738	306233	117768	379126	275911
120	436853	302326	265259	284397	151455	18325	435378	150186	178172	215361	303848	107214	387028	287913
130	36068	24719	18788	35404	22226	18062	417941	127039	174837	214473	296219	105535	365993	225031
160	65112	33780	29411	44394	36006	17332	407958	118770	178776	196177	282679	103996	355328	231466
190	66914	40905	40710	52470	42265	16459	395787	130425	173835	209715	275560	114344	321084	196559
220	81356	41964	35094	49841	36234	18434	382257	132231	138895	209406	271342	102864	286929	214019
250	82405	37237	38180	51977	39676	17359	376069	126356	134842	207339	256372	104068	284944	211494
280	91462	39946	39425	59568	43464	15584	356539	126531	131448	187379	289191	100777	294093	186506
310	89258	48556	37846	64908	46374	17333	381538	116139	133786	176986	258523	110201	292035	193584
320	87376	52088	35415	62892	45933	16902	368154	111191	130382	167543	257775	106520	278322	170196
620	115962	40681	55815	135787	51311	17173	356672	119248	123148	181712	241878	103170	306349	206482
920	167823	80152	82160	160790	53877	17106	316088	125486	136112	213913	270691	105260	209933	178701
1220	155135	31508	80868	165752	94261	17455	370071	115452	165275	201053	291997	113331	306259	159437
1520	158315	41744	108901	142591	67354	18589	415495	111599	178982	205349	281520	127464	302586	192931
1820	165926	39861	125201	132563	108470	18364	416366	117010	182838	210373	320500	124548	331901	161020
2120	169210	25035	126048	144054	200942	18241	428049	113274	127333	236889	275564	134559	374448	194953
2420	165187	22341	132237	186526	203998	16262	428136	109890	124271	242800	266704	119829	337189	178851
2720	213551	23266	116461	189536	172017	16207	414985	112615	161010	238004	255942	102014	319883	164620
3020	181336	17718	138034	250723	74472	17446	379284	108725	169039	239106	199829	105806	335973	161871
3320	185029	37360	150754	304018	62675	17399	410051	106120	229414	163242	241244	90475	367931	107388
3620	173864	34338	157866	272272	76924	16934	434459	99805	217114	197775	264969	128457	338368	179123
3920	190540	29209	148107	243612	53524	16572	444413	105075	161031	219189	278156	113021	384045	213899
4220	191339	41435	186640	312382	59080	16193	403860	101609	182644	209724	270849	117114	374329	170147
4520	209332	35094	196450	547204	32506	16248	470980	91569	157378	200578	247036	107780	331867	182817
time
0	443051	233332	268556	341749	180019	450998	154763	150186	182999	310208	106887	395767	218225
30	427708	226922	266070	331371	213616	441334	136334	157304	188721	264941	94160	374919	196178
60	416227	231448	266084	306133	149890	438820	127735	147698	193301	299839	108508	333374	211669
90	422930	228006	243480	268254	155348	454401	116371	148979	192604	288099	99634	360992	257777
120	418528	284001	246934	266072	133130	417053	131861	159847	197036	285523	88889	368703	269588
130	18006	6657	726	17342	4164	399879	108977	156775	196411	278157	87473	347931	206969
160	47780	16448	12079	27062	18674	390626	101438	161444	178845	265347	86664	337996	214134
190	50455	24446	24251	36011	25806	379328	113966	157376	193256	259101	97885	304625	180100
220	62922	23530	16660	31407	17800	363823	113797	120461	190972	252908	84430	268495	195585
250	65046	19878	20821	34618	22317	358710	108997	117483	189980	239013	86709	267585	194135
280	75878	24362	23841	43984	27880	340955	110947	115864	171795	273607	85193	278509	170922
310	71925	31223	20513	47575	29041	364205	98806	116453	159653	241190	92868	274702	176251
320	70474	35186	18513	45990	29031	351252	94289	113480	150641	240873	89618	261420	153294
620	98789	23508	38642	118614	34138	339499	102075	105975	164539	224705	85997	289176	189309
920	150717	63046	65054	143684	36771	298982	108380	119006	196807	253585	88154	192827	161595
1220	137680	14053	63413	148297	76806	352616	97997	147820	183598	274542	95876	288804	141982
1520	139726	23155	90312	124002	48765	396906	93010	160393	186760	262931	108875	283997	174342
1820	147562	21497	106837	114199	90106	398002	98646	164474	192009	302136	106184	313537	142656
2120	150969	6794	107807	125813	182701	409808	95033	109092	218648	257323	116318	356207	176712
2420	148925	6079	115975	170264	187736	411874	93628	108009	226538	250442	103567	320927	162589
2720	197344	7059	100254	173329	155810	398778	96408	144803	221797	239735	85807	303676	148413
3020	163890	272	120588	233277	57026	361838	91279	151593	221660	182383	88360	318527	144425
3320	167630	19961	133355	286619	45276	392652	88721	212015	145843	223845	73076	350532	89989
3620	156930	17404	140932	255338	59990	417525	82871	200180	180841	248035	111523	321434	162189
3920	173968	12637	131535	227040	36952	427841	88503	144459	202617	261584	96449	367473	197327
4220	175146	25242	170447	296189	42887	387667	85416	166451	193531	254656	100921	358136	153954
4520	193084	18846	180202	530956	16258	454732	75321	141130	184330	230788	91532	315619	166569
	AVERAGE OF PREBLEACH
	425689	240742	258225	302716	166401	440521	133413	152803	190932	289722	99615.6	366751	230687
NORMALIZED DATA
time	b1	b2	b3	b4	b5	c1	c2	c3	c4	c5	c6	c7	c8	Average of controls
120	1	1	1	1	1	1	1	1	1	1	1	1	1	1
130	0.0422985	0.027652	0.0028115	0.0572881	0.0250239	0.907741	0.816841	1.026	1.0287	0.960082	0.878105	0.948685	0.897184	0.932916
160	0.112242	0.0683222	0.0467771	0.0893974	0.112223	0.886736	0.760332	1.05655	0.936694	0.915868	0.869984	0.921595	0.928243	0.9095
190	0.118526	0.101544	0.0939143	0.11896	0.155084	0.861089	0.854236	1.02993	1.01217	0.894309	0.982627	0.830604	0.78071	0.905709
220	0.147812	0.0977396	0.0645174	0.103751	0.106971	0.825892	0.852969	0.788343	1.00021	0.872933	0.847558	0.732091	0.847836	0.845979
250	0.152802	0.0825698	0.0806313	0.114358	0.134116	0.814285	0.816991	0.768854	0.995013	0.824974	0.870436	0.729609	0.84155	0.832714
280	0.178248	0.101196	0.0923265	0.145298	0.167547	0.773981	0.831607	0.758258	0.89977	0.944378	0.855217	0.759395	0.740925	0.820441
310	0.168961	0.129695	0.0794385	0.157161	0.174525	0.826759	0.740604	0.762113	0.836176	0.832488	0.932264	0.749015	0.764025	0.80543
320	0.165553	0.146157	0.0716933	0.151925	0.174465	0.797355	0.706746	0.742657	0.788976	0.831394	0.899638	0.7128	0.66451	0.768009
620	0.232069	0.0976482	0.149645	0.391833	0.205156	0.770676	0.765106	0.693541	0.861767	0.775588	0.863288	0.78848	0.82063	0.792385
920	0.354054	0.261882	0.251928	0.47465	0.220979	0.678701	0.812366	0.778821	1.03077	0.87527	0.884942	0.525771	0.700493	0.785892
1220	0.323429	0.0583737	0.245573	0.489889	0.461573	0.800452	0.73454	0.967391	0.961587	0.947605	0.96246	0.787466	0.615474	0.847122
1520	0.328235	0.0961819	0.349742	0.409632	0.293058	0.900992	0.697159	1.04967	0.978148	0.907529	1.09295	0.774359	0.75575	0.89457
1820	0.346643	0.0892948	0.413736	0.377248	0.5415	0.90348	0.739404	1.07638	1.00564	1.04285	1.06594	0.854904	0.618395	0.913374
2120	0.354646	0.0282211	0.417493	0.415614	1.09796	0.93028	0.712323	0.71394	1.14516	0.888172	1.16767	0.97125	0.766024	0.911852
2420	0.349845	0.0252511	0.449124	0.562455	1.12822	0.93497	0.701792	0.706852	1.18648	0.864422	1.03967	0.875054	0.704802	0.876755
2720	0.463587	0.0293219	0.388243	0.57258	0.936355	0.905241	0.722629	0.947646	1.16165	0.827466	0.861381	0.828017	0.643351	0.862173
3020	0.385	0.00112984	0.466988	0.770614	0.342703	0.821386	0.684185	0.992083	1.16094	0.62951	0.88701	0.86851	0.626064	0.83371
3320	0.393785	0.0829146	0.51643	0.946825	0.27209	0.891335	0.665011	1.38751	0.763847	0.77262	0.73358	0.955777	0.390091	0.819971
3620	0.36865	0.0722932	0.545773	0.843491	0.360516	0.947798	0.621162	1.31005	0.947148	0.856114	1.11953	0.876437	0.703068	0.922664
3920	0.408674	0.0524919	0.509382	0.75001	0.222067	0.971215	0.663377	0.945395	1.0612	0.902879	0.968212	1.00197	0.855387	0.921204
4220	0.411441	0.104851	0.660072	0.978439	0.257733	0.880019	0.640238	1.08932	1.01361	0.878967	1.0131	0.97651	0.667371	0.894892
4520	0.45358	0.078283	0.697849	1.75398	0.097704	1.03226	0.564571	0.923609	0.965421	0.796584	0.918852	0.860581	0.722055	0.847992
CORRECTED DATA
Time	b1	b2	b3	b4	b5			Filter out due to large abrupt change or wrong targeting.
120	1	1	1	1	1
130	0.0453401	0.0296404	0.00301367	0.0614075	0.0268234
160	0.12341	0.0751205	0.0514316	0.0982928	0.12339
190	0.130865	0.112116	0.103691	0.131344	0.171229
220	0.174723	0.115534	0.0762636	0.12264	0.126446
250	0.183499	0.0991574	0.0968295	0.137332	0.161059
280	0.217258	0.123343	0.112533	0.177097	0.204216
310	0.209778	0.161026	0.0986287	0.195126	0.216685
320	0.215561	0.190306	0.0933496	0.197816	0.227165
620	0.292874	0.123233	0.188854	0.494498	0.258909
920	0.450513	0.333229	0.320563	0.603964	0.281182
1220	0.381797	0.0689083	0.289891	0.578298	0.544872
1520	0.366919	0.107517	0.390961	0.457909	0.327596
1820	0.379519	0.0977637	0.452976	0.413027	0.592858
2120	0.38893	0.0309492	0.457851	0.455791	1.2041
2420	0.399022	0.0288006	0.512257	0.641519	1.28681
2720	0.537697	0.0340093	0.450308	0.664113	1.08604
3020	0.461791	0.0013552	0.560133	0.924318	0.411058
3320	0.480243	0.101119	0.629815	1.15471	0.331829
3620	0.399549	0.0783527	0.591518	0.91419	0.390733
3920	0.44363	0.0569819	0.552952	0.814163	0.241061
4220	0.459766	0.117166	0.737599	1.09336	0.288005
4520	0.534888	0.0923158	0.822944	2.06839	0.115218
	Normalize the bouton fluorescent right after bleaching to 0
Recovery Time_(sec)	b1	b2	b3	b4	b5
0	0	0	0	0	0
30	0.0817779	0.0468693	0.0485643	0.0392986	0.0992282
60	0.0895866	0.0849948	0.100982	0.0745124	0.148386
90	0.135528	0.0885176	0.0734714	0.0652385	0.102369
120	0.14472	0.0716405	0.0940994	0.0808916	0.137936
150	0.180083	0.0965646	0.10985	0.123259	0.182282
180	0.172247	0.135398	0.095904	0.142467	0.195095
190	0.178305	0.165573	0.090609	0.145333	0.205863
490	0.25929	0.0964518	0.186402	0.461426	0.238483
790	0.424416	0.312862	0.318509	0.578053	0.26137
1090	0.352437	0.0404674	0.287744	0.550708	0.532327
1390	0.336852	0.0802558	0.38912	0.422443	0.309063
1690	0.35005	0.0702042	0.451323	0.374624	0.581636
1990	0.359908	0.00134876	0.456213	0.420186	1.20972
2290	0.37048	-0.000865436	0.510783	0.618065	1.29471
2590	0.51574	0.00450228	0.448646	0.642137	1.08841
2890	0.436229	-0.0291492	0.558803	0.919367	0.394825
3190	0.455558	0.0736618	0.628696	1.16483	0.313413
3490	0.371031	0.0502002	0.590283	0.908576	0.37394
3790	0.417206	0.0281766	0.551601	0.802005	0.220143
4090	0.434109	0.0901991	0.736806	1.09947	0.26838
4390	0.512798	0.0645899	0.822408	2.13829	0.0908311

## Sheet: VG1 21Feb F1
time	b1	b2	b3	b4	b5	background	c1	c2	c3	c4	c5	c6	c7	c8
0	346390	378298	315674	236207	279953	8986	335528	276744	438746	141453	181569	260711	317695	391688
30	352356	375915	313602	237701	276876	8324	318505	266054	436360	136401	187810	254181	292575	394677
60	324752	373021	300488	238195	256534	8572	302407	259796	412732	128513	195564	278405	284879	374721
90	330118	357763	317862	228924	263296	8734	300642	249724	415588	130234	195349	264206	279244	376351
120	344426	366411	300335	227661	266687	8069	296340	247454	421850	118384	189129	269404	279026	362161
130	25230	31408	24546	18540	18042	7920	286984	237137	412664	116440	190769	267577	272707	340273
160	46250	48780	33866	26534	28987	8443	300986	244355	402356	115563	178237	264102	273938	344041
190	47742	51639	36794	27681	33234	8384	293462	239207	385299	111563	186138	257632	284719	340372
220	55497	52235	40015	29200	33020	8109	299460	231249	398717	120410	182351	269363	267166	338003
250	67339	54320	42470	30057	36674	8767	309752	223375	394236	119165	179141	260430	269854	324883
280	81200	55531	45938	32072	41713	8638	308594	225894	386769	117716	188085	243549	288018	333150
310	77411	62628	50492	33239	47208	7913	305630	231223	370893	116537	180604	252481	295495	327041
320	79252	65891	55351	31820	46315	8675	298641	224068	373827	117165	174391	242318	286651	319012
620	94817	85384	55311	46908	69502	8686	352533	259315	404946	140032	204487	261618	339617	341848
920	112104	94945	64748	52911	75385	8861	345987	262923	406779	144050	230560	285065	269725	364719
1220	126746	93022	81342	52686	92982	9012	324597	263135	423696	133106	186850	284130	292898	356695
1520	146173	98417	106485	59129	118020	8488	346739	256383	367285	144148	176987	283098	319565	370291
1820	177426	100792	107402	80574	103161	9526	375716	273734	421806	160464	194328	290399	325398	416499
2120	181123	118033	124936	90548	121589	8883	366334	283974	405467	158646	240746	275357	276577	409943
2420	189163	134989	109344	90605	156023	8359	353865	278192	406832	160194	241600	311635	292665	416825
2720	198097	164364	114774	93023	149426	8545	352525	262239	450488	165065	254467	291383	333743	423590
3020	213218	166975	126533	94503	133723	8917	321146	261404	440330	146933	229870	295171	297284	404087
3320	239536	165470	122469	89257	143019	9286	277604	249900	429704	137007	218574	277226	323126	396549
3620	237130	143640	123147	92089	172222	8783	278420	227458	396780	146098	231858	270332	298543	419509
3920	236879	163892	117839	98256	188735	8603	284179	266736	407305	138074	249690	280197	314397	396769
4220	261978	187668	125404	110264	189537	8608	300450	282696	405206	134372	259702	280630	302762	389826
4520	259535	158783	134138	105760	205763	8359	297470	287441	430086	136072	226596	260325	321698	390508
time
0	337404	369312	306688	227221	270967	326542	267758	429760	132467	172583	251725	308709	382702
30	344032	367591	305278	229377	268552	310181	257730	428036	128077	179486	245857	284251	386353
60	316180	364449	291916	229623	247962	293835	251224	404160	119941	186992	269833	276307	366149
90	321384	349029	309128	220190	254562	291908	240990	406854	121500	186615	255472	270510	367617
120	336357	358342	292266	219592	258618	288271	239385	413781	110315	181060	261335	270957	354092
130	17310	23488	16626	10620	10122	279064	229217	404744	108520	182849	259657	264787	332353
160	37807	40337	25423	18091	20544	292543	235912	393913	107120	169794	255659	265495	335598
190	39358	43255	28410	19297	24850	285078	230823	376915	103179	177754	249248	276335	331988
220	47388	44126	31906	21091	24911	291351	223140	390608	112301	174242	261254	259057	329894
250	58572	45553	33703	21290	27907	300985	214608	385469	110398	170374	251663	261087	316116
280	72562	46893	37300	23434	33075	299956	217256	378131	109078	179447	234911	279380	324512
310	69498	54715	42579	25326	39295	297717	223310	362980	108624	172691	244568	287582	319128
320	70577	57216	46676	23145	37640	289966	215393	365152	108490	165716	233643	277976	310337
620	86131	76698	46625	38222	60816	343847	250629	396260	131346	195801	252932	330931	333162
920	103243	86084	55887	44050	66524	337126	254062	397918	135189	221699	276204	260864	355858
1220	117734	84010	72330	43674	83970	315585	254123	414684	124094	177838	275118	283886	347683
1520	137685	89929	97997	50641	109532	338251	247895	358797	135660	168499	274610	311077	361803
1820	167900	91266	97876	71048	93635	366190	264208	412280	150938	184802	280873	315872	406973
2120	172240	109150	116053	81665	112706	357451	275091	396584	149763	231863	266474	267694	401060
2420	180804	126630	100985	82246	147664	345506	269833	398473	151835	233241	303276	284306	408466
2720	189552	155819	106229	84478	140881	343980	253694	441943	156520	245922	282838	325198	415045
3020	204301	158058	117616	85586	124806	312229	252487	431413	138016	220953	286254	288367	395170
3320	230250	156184	113183	79971	133733	268318	240614	420418	127721	209288	267940	313840	387263
3620	228347	134857	114364	83306	163439	269637	218675	387997	137315	223075	261549	289760	410726
3920	228276	155289	109236	89653	180132	275576	258133	398702	129471	241087	271594	305794	388166
4220	253370	179060	116796	101656	180929	291842	274088	396598	125764	251094	272022	294154	381218
4520	251176	150424	125779	97401	197404	289111	279082	421727	127713	218237	251966	313339	382149
	AVERAGE OF PREBLEACH
	331071	361745	301055	225201	260132	302147	251417	416518	122460	181347	256844	282147	371383
NORMALIZED DATA
time	b1	b2	b3	b4	b5	c1	c2	c3	c4	c5	c6	c7	c8	Average of controls
120	1	1	1	1	1	1	1	1	1	1	1	1	1	1
130	0.0522848	0.0649298	0.0552258	0.047158	0.038911	0.923602	0.911699	0.971732	0.886167	1.00828	1.01095	0.938472	0.894907	0.943226
160	0.114196	0.111507	0.0844463	0.0803328	0.0789752	0.968213	0.938328	0.945728	0.874735	0.936292	0.995385	0.940982	0.903645	0.937913
190	0.118881	0.119573	0.0943681	0.085688	0.0955284	0.943506	0.918087	0.904918	0.842553	0.980186	0.970424	0.979402	0.893924	0.929125
220	0.143135	0.121981	0.105981	0.0936543	0.0957628	0.964268	0.887528	0.937793	0.917042	0.96082	1.01717	0.918164	0.888286	0.936384
250	0.176917	0.125926	0.11195	0.0945379	0.10728	0.996153	0.853592	0.925455	0.901503	0.939491	0.979827	0.925359	0.851187	0.921571
280	0.219173	0.12963	0.123898	0.104058	0.127147	0.992747	0.864125	0.907838	0.890724	0.989522	0.914604	0.990194	0.873794	0.927943
310	0.209918	0.151253	0.141433	0.11246	0.151058	0.985337	0.888204	0.871463	0.887016	0.952267	0.952203	1.01926	0.859297	0.926881
320	0.213178	0.158167	0.155041	0.102775	0.144696	0.959684	0.856715	0.876677	0.885922	0.913805	0.909667	0.985218	0.835626	0.902914
620	0.260158	0.212023	0.154872	0.169724	0.233789	1.13801	0.996864	0.951363	1.07256	1.0797	0.984767	1.1729	0.897086	1.03666
920	0.311845	0.237969	0.185637	0.195603	0.255732	1.11577	1.01052	0.955344	1.10394	1.22251	1.07537	0.924568	0.958198	1.04578
1220	0.355615	0.232236	0.240255	0.193934	0.322797	1.04447	1.01076	0.995596	1.01334	0.980649	1.07115	1.00616	0.936185	1.00729
1520	0.415877	0.248598	0.325512	0.224871	0.421063	1.11949	0.98599	0.86142	1.10779	0.929151	1.06917	1.10254	0.974206	1.01872
1820	0.507141	0.252294	0.32511	0.315488	0.359952	1.21196	1.05087	0.989825	1.23255	1.01905	1.09355	1.11953	1.09583	1.10165
2120	0.52025	0.301732	0.385487	0.362632	0.433264	1.18304	1.09416	0.952141	1.22295	1.27856	1.03749	0.948776	1.07991	1.09963
2420	0.546118	0.350054	0.335437	0.365212	0.56765	1.1435	1.07325	0.956676	1.23987	1.28616	1.18078	1.00765	1.09985	1.12347
2720	0.572541	0.430743	0.352856	0.375123	0.541575	1.13845	1.00906	1.06104	1.27813	1.35608	1.1012	1.15258	1.11757	1.15176
3020	0.61709	0.436933	0.390679	0.380043	0.479779	1.03337	1.00425	1.03576	1.12703	1.2184	1.1145	1.02205	1.06405	1.07743
3320	0.695469	0.431752	0.375954	0.35511	0.514096	0.888037	0.95703	1.00936	1.04296	1.15407	1.0432	1.11233	1.04276	1.03122
3620	0.689721	0.372796	0.379877	0.369919	0.628292	0.892402	0.869769	0.931525	1.1213	1.2301	1.01832	1.02698	1.10594	1.02454
3920	0.689507	0.429278	0.362844	0.398103	0.692463	0.912058	1.02671	0.957226	1.05725	1.32942	1.05743	1.08381	1.04519	1.05864
4220	0.765303	0.49499	0.387955	0.451402	0.695527	0.965893	1.09017	0.952174	1.02698	1.3846	1.05909	1.04256	1.02648	1.06849
4520	0.758676	0.415829	0.417794	0.432508	0.75886	0.956854	1.11003	1.01251	1.0429	1.20342	0.981006	1.11055	1.02899	1.05578
CORRECTED DATA
Time	b1	b2	b3	b4	b5			Filter out due to large abrupt change or wrong targeting.
120	1	1	1	1	1
130	0.0554319	0.068838	0.0585498	0.0499964	0.0412531
160	0.121755	0.118888	0.0900364	0.0856506	0.0842031
190	0.127949	0.128695	0.101567	0.0922245	0.102815
220	0.15286	0.130268	0.113181	0.100017	0.102269
250	0.191973	0.136643	0.121477	0.102583	0.11641
280	0.236192	0.139696	0.133518	0.112139	0.13702
310	0.226478	0.163185	0.15259	0.121331	0.162974
320	0.236099	0.175174	0.171712	0.113826	0.160254
620	0.250959	0.204525	0.149395	0.163723	0.225522
920	0.298194	0.227552	0.177511	0.187041	0.244537
1220	0.353041	0.230555	0.238516	0.19253	0.320461
1520	0.408235	0.24403	0.31953	0.220739	0.413326
1820	0.460348	0.229015	0.295113	0.286378	0.32674
2120	0.473115	0.274395	0.350562	0.329777	0.39401
2420	0.4861	0.311583	0.298573	0.325076	0.505266
2720	0.497099	0.373985	0.306361	0.325694	0.470213
3020	0.572745	0.405534	0.362604	0.352733	0.445301
3320	0.674415	0.418681	0.364573	0.344359	0.498533
3620	0.6732	0.363866	0.370778	0.361058	0.613242
3920	0.651315	0.405501	0.342746	0.376052	0.654108
4220	0.716244	0.463259	0.363086	0.422465	0.650941
4520	0.718591	0.393859	0.39572	0.409656	0.718766
	Normalize the bouton fluorescent right after bleaching to 0
Recovery Time_(sec)	b1	b2	b3	b4	b5
0	0	0	0	0	0
30	0.0702156	0.0537503	0.0334447	0.0375305	0.0447981
60	0.0767729	0.0642816	0.045692	0.0444504	0.0642112
90	0.103145	0.0659717	0.0580284	0.052653	0.0636411
120	0.144554	0.0728173	0.0668406	0.0553546	0.0783908
150	0.191369	0.0760965	0.079631	0.0654126	0.0998877
180	0.181084	0.101322	0.0998883	0.0750891	0.126959
190	0.19127	0.114197	0.1202	0.0671887	0.124121
490	0.207001	0.145718	0.0964954	0.119711	0.192197
790	0.257009	0.170447	0.126359	0.144257	0.212031
1090	0.315075	0.173672	0.191159	0.150035	0.291222
1390	0.373508	0.188144	0.277211	0.179728	0.388082
1690	0.428679	0.172019	0.251275	0.248822	0.29777
1990	0.442194	0.220753	0.310172	0.294505	0.367935
2290	0.455942	0.260691	0.25495	0.289556	0.483979
2590	0.467586	0.327706	0.263223	0.290207	0.447417
2890	0.547672	0.361587	0.322964	0.318669	0.421434
3190	0.655308	0.375706	0.325055	0.309855	0.476955
3490	0.654021	0.316839	0.331645	0.327432	0.5966
3790	0.630853	0.361551	0.301871	0.343215	0.639225
4090	0.699592	0.42358	0.323476	0.392071	0.635922
4390	0.702077	0.349049	0.358139	0.378588	0.706665

## Sheet: VG1 21Feb F3
time	b1	b2	b3	b4	b5	background	c1	c2	c3	c4	c5	c6	c7	c8
0	300099	312933	298291	436303	329022	9831	158322	302108	353198	206765	122831	226168	304469	334314
30	304469	283657	270476	417561	337344	10572	151601	290417	351559	204709	117003	214639	293105	307393
60	294112	285971	261328	410310	324034	10074	144591	293129	339819	188344	115957	211609	265312	301791
90	289909	276105	254012	403445	328725	11077	144805	277295	343150	202284	121107	201725	258022	301682
120	281515	277196	261918	413379	300069	11120	149717	275913	331024	181639	127834	192686	246735	271113
130	34432	19549	14532	64421	17948	10642	145909	278032	315918	197766	118798	192368	240942	264768
160	43247	29414	23336	80366	35804	11427	134183	266866	299530	184786	126449	186674	237645	264401
190	50595	31667	35283	81769	45535	13471	132329	263881	304810	201458	125026	190341	242067	258815
220	53010	35437	37298	76943	43615	12312	140504	258752	289877	196926	110084	180246	219634	254593
250	53855	44554	51855	95045	44478	11403	138924	254614	305435	191736	107824	193873	234709	264351
280	52243	45264	45701	91320	45136	10611	133736	262813	281349	186034	106406	185848	225634	238117
310	53362	50987	54061	95526	54966	9920	134403	250383	258653	181098	103429	176723	224285	239576
320	53641	47313	48526	81774	53441	10691	124869	242360	253385	171801	105590	181259	217458	225700
620	76286	64629	118743	132291	94871	11118	112273	263610	314579	178023	94146	185416	239490	260235
920	81735	74760	103458	138526	147451	11449	139776	296832	299946	211481	107861	184759	221206	247401
1220	98609	83557	125177	145659	157577	14713	146876	287405	288758	232209	104743	185289	221017	237608
1520	123294	96418	121457	144438	171290	11934	144865	267447	276497	175116	101037	187661	244230	255570
1820	109261	123098	113408	164841	190882	11362	143202	291430	312117	184124	115133	180928	244040	253570
2120	151665	130491	51342	191511	228170	11825	151620	271930	312248	189725	115295	167966	225743	239203
2420	139218	128147	113707	194196	214677	12846	152108	258373	303620	177699	117629	186300	226689	243061
2720	134576	125948	127219	216684	246285	12131	121968	263280	298128	178743	127315	192568	213779	225506
3020	159332	108742	106983	227175	224554	11513	141588	255213	301345	156900	123014	203654	228182	214186
3320	166376	95715	99889	222539	228694	12316	124174	239286	287147	157066	140844	219047	205203	202094
3620	163728	94202	119961	233950	233136	10567	108808	247066	290776	146977	150030	235735	225851	219799
3920	163621	96796	103789	252632	241899	13869	112176	272321	313560	144109	138630	234353	208636	208022
4220	158217	105069	126859	251848	231737	12958	126372	263483	311437	151993	150671	225434	218541	205545
4520	146151	91877	108591	226946	227375	12868	129236	296678	299777	150783	148811	211532	208198	208509
time
0	290268	303102	288460	426472	319191	148491	292277	343367	196934	113000	216337	294638	324483
30	293897	273085	259904	406989	326772	141029	279845	340987	194137	106431	204067	282533	296821
60	284038	275897	251254	400236	313960	134517	283055	329745	178270	105883	201535	255238	291717
90	278832	265028	242935	392368	317648	133728	266218	332073	191207	110030	190648	246945	290605
120	270395	266076	250798	402259	288949	138597	264793	319904	170519	116714	181566	235615	259993
130	23790	8907	3890	53779	7306	135267	267390	305276	187124	108156	181726	230300	254126
160	31820	17987	11909	68939	24377	122756	255439	288103	173359	115022	175247	226218	252974
190	37124	18196	21812	68298	32064	118858	250410	291339	187987	111555	176870	228596	245344
220	40698	23125	24986	64631	31303	128192	246440	277565	184614	97772	167934	207322	242281
250	42452	33151	40452	83642	33075	127521	243211	294032	180333	96421	182470	223306	252948
280	41632	34653	35090	80709	34525	123125	252202	270738	175423	95795	175237	215023	227506
310	43442	41067	44141	85606	45046	124483	240463	248733	171178	93509	166803	214365	229656
320	42950	36622	37835	71083	42750	114178	231669	242694	161110	94899	170568	206767	215009
620	65168	53511	107625	121173	83753	101155	252492	303461	166905	83028	174298	228372	249117
920	70286	63311	92009	127077	136002	128327	285383	288497	200032	96412	173310	209757	235952
1220	83896	68844	110464	130946	142864	132163	272692	274045	217496	90030	170576	206304	222895
1520	111360	84484	109523	132504	159356	132931	255513	264563	163182	89103	175727	232296	243636
1820	97899	111736	102046	153479	179520	131840	280068	300755	172762	103771	169566	232678	242208
2120	139840	118666	39517	179686	216345	139795	260105	300423	177900	103470	156141	213918	227378
2420	126372	115301	100861	181350	201831	139262	245527	290774	164853	104783	173454	213843	230215
2720	122445	113817	115088	204553	234154	109837	251149	285997	166612	115184	180437	201648	213375
3020	147819	97229	95470	215662	213041	130075	243700	289832	145387	111501	192141	216669	202673
3320	154060	83399	87573	210223	216378	111858	226970	274831	144750	128528	206731	192887	189778
3620	153161	83635	109394	223383	222569	98241	236499	280209	136410	139463	225168	215284	209232
3920	149752	82927	89920	238763	228030	98307	258452	299691	130240	124761	220484	194767	194153
4220	145259	92111	113901	238890	218779	113414	250525	298479	139035	137713	212476	205583	192587
4520	133283	79009	95723	214078	214507	116368	283810	286909	137915	135943	198664	195330	195641
	AVERAGE OF PREBLEACH
	283486	276638	258670	405665	313304	139272	277238	333215	186213	110412	198831	262994	292724
NORMALIZED DATA
time	b1	b2	b3	b4	b5	c1	c2	c3	c4	c5	c6	c7	c8	Average of controls
120	1	1	1	1	1	1	1	1	1	1	1	1	1	1
130	0.0839195	0.0321974	0.0150385	0.13257	0.0233192	0.971241	0.96448	0.916153	1.00489	0.979571	0.913974	0.875686	0.868143	0.936767
160	0.112245	0.0650201	0.0460393	0.169941	0.0778062	0.881409	0.921372	0.864615	0.93097	1.04176	0.881388	0.860165	0.864207	0.905735
190	0.130955	0.0657756	0.0843236	0.168361	0.102341	0.853421	0.903232	0.874327	1.00952	1.01036	0.889551	0.869207	0.838142	0.90597
220	0.143563	0.0835931	0.096594	0.159321	0.0999125	0.920441	0.888913	0.83299	0.991411	0.885523	0.844608	0.788315	0.827678	0.872485
250	0.14975	0.119835	0.156384	0.206185	0.105568	0.915623	0.877266	0.882409	0.968421	0.873287	0.917716	0.849092	0.864118	0.893491
280	0.146857	0.125265	0.135655	0.198955	0.110196	0.884059	0.909696	0.812502	0.942054	0.867617	0.881338	0.817597	0.777204	0.861508
310	0.153242	0.148451	0.170646	0.211026	0.143777	0.89381	0.867353	0.746464	0.919257	0.846913	0.83892	0.815095	0.784548	0.839045
320	0.151507	0.132383	0.146267	0.175226	0.136449	0.819818	0.835633	0.72834	0.86519	0.859502	0.857856	0.786205	0.734512	0.810882
620	0.229881	0.193434	0.41607	0.298702	0.267322	0.72631	0.910742	0.910706	0.89631	0.751986	0.876616	0.868355	0.851031	0.849007
920	0.247935	0.228859	0.3557	0.313256	0.43409	0.92141	1.02938	0.865798	1.07421	0.873205	0.871647	0.797574	0.806057	0.90491
1220	0.295944	0.24886	0.427046	0.322794	0.455992	0.948953	0.983604	0.822426	1.16799	0.815403	0.857896	0.784444	0.761452	0.892772
1520	0.392824	0.305396	0.423408	0.326634	0.508631	0.954468	0.921639	0.79397	0.876317	0.807008	0.883803	0.883276	0.832307	0.869098
1820	0.34534	0.403907	0.394502	0.378339	0.57299	0.946634	1.01021	0.902585	0.927764	0.939856	0.852816	0.884728	0.827428	0.911503
2120	0.493287	0.428958	0.15277	0.442942	0.690527	1.00375	0.938202	0.901589	0.955356	0.93713	0.785297	0.813396	0.776766	0.888936
2420	0.445779	0.416794	0.389921	0.447044	0.644202	0.999925	0.885619	0.872631	0.885291	0.949022	0.872371	0.81311	0.786458	0.883053
2720	0.431926	0.41143	0.444922	0.504241	0.74737	0.788649	0.905898	0.858295	0.894737	1.04322	0.907491	0.766741	0.728929	0.861745
3020	0.521433	0.351467	0.36908	0.531626	0.679982	0.933961	0.879029	0.869804	0.780755	1.00987	0.966355	0.823856	0.692369	0.8695
3320	0.543448	0.301474	0.338551	0.518218	0.690633	0.80316	0.818684	0.824785	0.777334	1.16408	1.03973	0.733428	0.648318	0.85119
3620	0.540277	0.302327	0.422909	0.550659	0.710393	0.705387	0.853055	0.840925	0.732547	1.26312	1.13246	0.81859	0.714776	0.882608
3920	0.528252	0.299768	0.347624	0.588572	0.727823	0.705861	0.93224	0.899392	0.699413	1.12996	1.1089	0.740576	0.663263	0.859952
4220	0.512403	0.332966	0.440333	0.588885	0.698296	0.814332	0.903647	0.895754	0.746643	1.24727	1.06863	0.781703	0.657914	0.889486
4520	0.470157	0.285605	0.370058	0.527721	0.684661	0.835542	1.02371	0.861032	0.740629	1.23124	0.999162	0.742717	0.668347	0.887797
CORRECTED DATA
Time	b1	b2	b3	b4	b5			Filter out due to large abrupt change or wrong targeting.
120	1	1	1	1	1
130	0.0895842	0.0343707	0.0160536	0.141519	0.0248933
160	0.123927	0.0717871	0.0508309	0.187627	0.0859039
190	0.144547	0.0726024	0.0930755	0.185835	0.112963
220	0.164545	0.0958104	0.110711	0.182606	0.114515
250	0.167601	0.13412	0.175026	0.230763	0.118153
280	0.170465	0.145402	0.157463	0.230938	0.127911
310	0.182639	0.176928	0.203381	0.251508	0.171358
320	0.186842	0.163258	0.180381	0.216093	0.168272
620	0.270764	0.227835	0.490067	0.351825	0.314864
920	0.273988	0.252908	0.393078	0.346174	0.479705
1220	0.331489	0.27875	0.478337	0.361563	0.51076
1520	0.45199	0.351394	0.487181	0.375831	0.585239
1820	0.378869	0.443123	0.432804	0.415072	0.628621
2120	0.554919	0.482553	0.171857	0.498283	0.776802
2420	0.504815	0.471992	0.44156	0.506248	0.729516
2720	0.501222	0.477438	0.516303	0.58514	0.867275
3020	0.599693	0.404218	0.424474	0.611416	0.782038
3320	0.638457	0.354179	0.397738	0.608816	0.811373
3620	0.612137	0.342538	0.479159	0.6239	0.80488
3920	0.614281	0.348587	0.404237	0.684425	0.846354
4220	0.576066	0.374335	0.495042	0.662051	0.785056
4520	0.529578	0.321701	0.416827	0.594417	0.771191
	Normalize the bouton fluorescent right after bleaching to 0
Recovery Time_(sec)	b1	b2	b3	b4	b5
0	0	0	0	0	0
30	0.0377225	0.0387481	0.0353447	0.0537097	0.0625682
60	0.0603712	0.0395925	0.0782786	0.0516214	0.0903185
90	0.0823365	0.0636266	0.0962022	0.0478608	0.0919096
120	0.0856934	0.1033	0.161566	0.103956	0.0956402
150	0.0888399	0.114983	0.143716	0.10416	0.105648
180	0.102211	0.147631	0.190384	0.128121	0.150204
190	0.106828	0.133474	0.167008	0.0868678	0.147039
490	0.199008	0.200351	0.481747	0.244975	0.297373
790	0.202549	0.226316	0.383176	0.238392	0.466422
1090	0.265708	0.253078	0.469826	0.256319	0.49827
1390	0.398066	0.328307	0.478814	0.272938	0.574651
1690	0.31775	0.423301	0.42355	0.318648	0.61914
1990	0.511123	0.464135	0.158345	0.415577	0.771104
2290	0.456089	0.453198	0.432449	0.424854	0.722611
2590	0.452143	0.458838	0.508411	0.516751	0.863886
2890	0.560304	0.383011	0.415084	0.547359	0.776474
3190	0.602881	0.331192	0.387912	0.54433	0.806557
3490	0.573972	0.319137	0.470661	0.561901	0.799899
3790	0.576327	0.3254	0.394517	0.632403	0.842432
4090	0.534351	0.352065	0.486803	0.606341	0.779568
4390	0.483288	0.297557	0.407313	0.527557	0.76535

## Sheet: VG1 17Apr F1
time	b1	b2	b3	b4	b5	background	c1	c2	c3	c4	c5	c6	c7	c8
1	196925	300545	277942	245951	218249	13221	249466	158567	183635	248199	213307	165380	140561	250786
2	192655	297353	262486	234337	270987	13257	244204	147423	189803	258888	231147	157728	140974	234465
3	214122	303592	260860	223016	244707	12603	254742	143654	193399	242640	225432	166870	139771	233508
4	222123	287001	254065	218638	264384	13048	241862	144904	199425	241394	223719	167571	135363	239689
5	203787	295498	246255	219342	269945	13200	243856	138283	180314	246483	212264	155079	139361	244888
6	16331	21520	17428	19329	21416	13459	233457	139186	172866	228992	207915	150403	140717	228553
7	23270	31481	32090	28426	34188	12575	236654	143631	180201	221008	208055	151856	131641	239596
8	25601	37810	36545	35331	34152	13298	226971	140400	165963	232755	212769	136602	129058	221144
9	26116	45209	36106	43055	44348	13566	215274	133372	168912	225852	194240	141896	130003	211099
10	26578	43751	42597	47214	44408	13373	222440	140959	173505	218065	204842	141450	133820	199724
11	30513	47008	43990	56502	46905	12910	204277	133416	172143	226857	196551	138452	131644	209413
12	31253	48677	42618	57684	54905	14030	223559	137812	175921	215042	194011	147120	127018	205345
13	29362	46412	41121	52169	55105	14107	206130	127821	174896	205455	189026	139866	123323	198728
14	44463	70335	75838	86722	86581	13520	200133	164644	183175	252944	208913	154904	131465	199858
15	50427	82778	100574	101307	106669	14185	210478	166144	165458	253814	221248	166070	131086	218912
16	66800	94028	125340	120666	129463	13326	221494	181568	182284	268019	237479	169695	146174	212758
17	75100	108146	142018	128952	117369	14580	222323	176435	194599	255935	226406	145325	138099	215317
18	73577	136592	150678	139815	159316	14349	239311	192469	181949	272881	219336	152578	146648	210249
19	90505	138621	165482	139376	162973	14678	231729	159655	195951	272518	229924	165959	140366	193031
20	86097	150590	165980	130643	154600	14341	197986	167517	186877	260953	234198	143410	141509	180305
21	89875	144525	180770	130499	182994	12932	215159	152431	169961	268306	231325	152024	131160	189127
22	104426	158420	204849	126192	209086	14094	227330	146674	189694	239420	211590	158228	116208	201215
23	103105	151398	210021	147737	239795	14741	198620	162348	160514	262559	203458	142357	115254	176939
24	103189	143500	194044	138971	232373	14421	206565	165254	170960	260004	209194	136243	112020	175733
25	101979	136816	217478	151552	237858	13725	202601	148624	169178	227632	203803	135092	107798	183892
26	109016	138028	213448	148991	283100	13480	197507	146502	186063	242247	188064	119516	112616	180664
27	106905	144609	215266	151755	267353	13571	189425	130523	167424	233105	215408	114278	110353	193331
time
0	183704	287324	264721	232730	205028	236245	145346	170414	234978	200086	152159	127340	237565
30	179398	284096	249229	221080	257730	230947	134166	176546	245631	217890	144471	127717	221208
60	201519	290989	248257	210413	232104	242139	131051	180796	230037	212829	154267	127168	220905
90	209075	273953	241017	205590	251336	228814	131856	186377	228346	210671	154523	122315	226641
120	190587	282298	233055	206142	256745	230656	125083	167114	233283	199064	141879	126161	231688
130	2872	8061	3969	5870	7957	219998	125727	159407	215533	194456	136944	127258	215094
160	10695	18906	19515	15851	21613	224079	131056	167626	208433	195480	139281	119066	227021
190	12303	24512	23247	22033	20854	213673	127102	152665	219457	199471	123304	115760	207846
220	12550	31643	22540	29489	30782	201708	119806	155346	212286	180674	128330	116437	197533
250	13205	30378	29224	33841	31035	209067	127586	160132	204692	191469	128077	120447	186351
280	17603	34098	31080	43592	33995	191367	120506	159233	213947	183641	125542	118734	196503
310	17223	34647	28588	43654	40875	209529	123782	161891	201012	179981	133090	112988	191315
320	15255	32305	27014	38062	40998	192023	113714	160789	191348	174919	125759	109216	184621
620	30943	56815	62318	73202	73061	186613	151124	169655	239424	195393	141384	117945	186338
920	36242	68593	86389	87122	92484	196293	151959	151273	239629	207063	151885	116901	204727
1220	53474	80702	112014	107340	116137	208168	168242	168958	254693	224153	156369	132848	199432
1520	60520	93566	127438	114372	102789	207743	161855	180019	241355	211826	130745	123519	200737
1820	59228	122243	136329	125466	144967	224962	178120	167600	258532	204987	138229	132299	195900
2120	75827	123943	150804	124698	148295	217051	144977	181273	257840	215246	151281	125688	178353
2420	71756	136249	151639	116302	140259	183645	153176	172536	246612	219857	129069	127168	165964
2720	76943	131593	167838	117567	170062	202227	139499	157029	255374	218393	139092	118228	176195
3020	90332	144326	190755	112098	194992	213236	132580	175600	225326	197496	144134	102114	187121
3320	88364	136657	195280	132996	225054	183879	147607	145773	247818	188717	127616	100513	162198
3620	88768	129079	179623	124550	217952	192144	150833	156539	245583	194773	121822	97599	161312
3920	88254	123091	203753	137827	224133	188876	134899	155453	213907	190078	121367	94073	170167
4220	95536	124548	199968	135511	269620	184027	133022	172583	228767	174584	106036	99136	167184
4520	93334	131038	201695	138184	253782	175854	116952	153853	219534	201837	100707	96782	179760
	AVERAGE OF PREBLEACH
	192857	283732	247256	215191	240589	233760	133500	176249	234455	208108	149460	126140	227601
NORMALIZED DATA
time	b1	b2	b3	b4	b5	c1	c2	c3	c4	c5	c6	c7	c8	Average of controls
120	1	1	1	1	1	1	1	1	1	1	1	1	1	1
130	0.0148919	0.0284106	0.0160522	0.0272781	0.0330731	0.941127	0.941772	0.90444	0.919294	0.934399	0.91626	1.00886	0.945047	0.9389
160	0.0554557	0.0666333	0.0789264	0.0736601	0.0898338	0.958585	0.98169	0.951073	0.889011	0.93932	0.931896	0.943918	0.99745	0.949118
190	0.0637935	0.0863914	0.09402	0.102388	0.0866791	0.914069	0.952072	0.866187	0.93603	0.958498	0.824998	0.917709	0.913202	0.910346
220	0.0650743	0.111524	0.0911607	0.137036	0.127945	0.862884	0.897421	0.881399	0.905445	0.868174	0.858626	0.923076	0.86789	0.883114
250	0.0684706	0.107066	0.118193	0.15726	0.128996	0.894365	0.955698	0.908553	0.873055	0.920046	0.856933	0.954866	0.81876	0.897785
280	0.0912751	0.120177	0.1257	0.202574	0.141299	0.818647	0.902664	0.903453	0.912529	0.882431	0.839972	0.941286	0.863365	0.883043
310	0.0893047	0.122112	0.115621	0.202862	0.169896	0.896342	0.927203	0.918534	0.857359	0.864844	0.890474	0.895733	0.84057	0.886382
320	0.0791002	0.113857	0.109255	0.176875	0.170407	0.821453	0.851788	0.912281	0.81614	0.84052	0.841424	0.86583	0.811159	0.845074
620	0.160446	0.200242	0.252039	0.340172	0.303676	0.79831	1.13201	0.962585	1.02119	0.938902	0.945967	0.935031	0.818703	0.944088
920	0.187922	0.241753	0.349391	0.404859	0.384407	0.83972	1.13827	0.858289	1.02207	0.994979	1.01623	0.926755	0.899498	0.961975
1220	0.277273	0.28443	0.453029	0.498813	0.48272	0.890519	1.26024	0.95863	1.08632	1.0771	1.04623	1.05318	0.876234	1.03106
1520	0.313808	0.329769	0.51541	0.531491	0.42724	0.888701	1.21239	1.02139	1.02943	1.01787	0.874784	0.97922	0.881967	0.988219
1820	0.307109	0.43084	0.551368	0.583045	0.602551	0.962362	1.33423	0.950925	1.10269	0.985003	0.924857	1.04883	0.860715	1.0212
2120	0.393178	0.436831	0.609911	0.579476	0.616384	0.92852	1.08597	1.0285	1.09974	1.0343	1.01219	0.996415	0.78362	0.996156
2420	0.372069	0.480203	0.613288	0.540459	0.582983	0.785613	1.14738	0.978931	1.05185	1.05646	0.86357	1.00815	0.729187	0.952642
2720	0.398965	0.463793	0.678803	0.546338	0.706858	0.865104	1.04493	0.890948	1.08922	1.04942	0.930632	0.937275	0.774138	0.947709
3020	0.468389	0.50867	0.771488	0.520923	0.810479	0.9122	0.993106	0.996315	0.961063	0.949007	0.964366	0.809528	0.822143	0.925966
3320	0.458185	0.481641	0.789789	0.618037	0.935431	0.786614	1.10567	0.827084	1.057	0.906822	0.853848	0.796836	0.712641	0.880813
3620	0.46028	0.454933	0.726466	0.578788	0.905912	0.821971	1.12983	0.888168	1.04746	0.935923	0.815082	0.773734	0.708748	0.890115
3920	0.457615	0.433828	0.824058	0.640487	0.931603	0.80799	1.01048	0.882006	0.912358	0.913362	0.812038	0.745781	0.747654	0.853958
4220	0.495373	0.438964	0.808749	0.629724	1.12067	0.787247	0.996416	0.979198	0.975739	0.838911	0.709462	0.785919	0.734547	0.85093
4520	0.483955	0.461837	0.815734	0.642146	1.05484	0.752284	0.876042	0.872928	0.936359	0.969867	0.673807	0.767257	0.789802	0.829793
CORRECTED DATA
Time	b1	b2	b3	b4	b5			Filter out due to large abrupt change or wrong targeting.
120	1	1	1	1	1
130	0.015861	0.0302595	0.0170968	0.0290532	0.0352253
160	0.0584287	0.0702055	0.0831576	0.0776091	0.0946498
190	0.0700761	0.0948995	0.103279	0.112472	0.0952156
220	0.0736872	0.126285	0.103226	0.155174	0.144879
250	0.0762661	0.119256	0.13165	0.175165	0.143683
280	0.103364	0.136094	0.142348	0.229404	0.160014
310	0.100752	0.137764	0.130442	0.228865	0.191673
320	0.0936015	0.134731	0.129285	0.209302	0.201647
620	0.169948	0.212101	0.266965	0.360318	0.321661
920	0.19535	0.251309	0.363202	0.420862	0.399602
1220	0.268922	0.275863	0.439384	0.483788	0.468181
1520	0.317549	0.3337	0.521554	0.537827	0.432333
1820	0.300733	0.421895	0.539921	0.57094	0.590042
2120	0.394695	0.438517	0.612264	0.581712	0.618762
2420	0.390565	0.504075	0.643776	0.567327	0.611964
2720	0.420978	0.489383	0.716257	0.576483	0.74586
3020	0.505839	0.54934	0.833171	0.562573	0.875279
3320	0.520184	0.546814	0.896659	0.701666	1.06201
3620	0.517102	0.511094	0.816149	0.65024	1.01775
3920	0.535875	0.508021	0.964986	0.750021	1.09092
4220	0.582155	0.515863	0.95043	0.740042	1.31699
4520	0.583224	0.556569	0.983057	0.773863	1.27121
	Normalize the bouton fluorescent right after bleaching to 0
Recovery Time_(sec)	b1	b2	b3	b4	b5
0	0	0	0	0	0
30	0.0432537	0.0411925	0.0672099	0.0500087	0.0615942
60	0.0550889	0.0666571	0.0876818	0.0859145	0.0621806
90	0.0587582	0.0990221	0.0876277	0.129895	0.113657
120	0.0613787	0.0917731	0.116546	0.150484	0.112417
150	0.0889135	0.109137	0.12743	0.206346	0.129345
180	0.086259	0.110859	0.115316	0.20579	0.16216
190	0.0789934	0.107731	0.114139	0.185642	0.172498
490	0.15657	0.187515	0.254215	0.341177	0.296894
790	0.182382	0.227947	0.352125	0.403533	0.377681
1090	0.257139	0.253268	0.429632	0.468342	0.448763
1390	0.306551	0.312909	0.513232	0.523998	0.411607
1690	0.289463	0.403856	0.531919	0.558102	0.575074
1990	0.38494	0.420996	0.60552	0.569196	0.604843
2290	0.380743	0.4886	0.637579	0.55438	0.597796
2590	0.411646	0.47345	0.711321	0.56381	0.73658
2890	0.497874	0.535278	0.83027	0.549484	0.870726
3190	0.512451	0.532673	0.894862	0.692739	1.06427
3490	0.509319	0.495839	0.812951	0.639774	1.01839
3790	0.528395	0.492669	0.964377	0.742541	1.09424
4090	0.575421	0.500756	0.949568	0.732264	1.32857
4390	0.576507	0.542732	0.982763	0.767096	1.28111

## Sheet: VG1 18Apr F1
time	b1	b2	b3	b4	b5	background	c1	c2	c3	c4	c5	c6	c7	c8
1	306119	457486	267684	379540	327539	12813	274673	216982	183457	133410	185238	133853	229563	212804
2	294129	464628	255376	379796	325682	12634	268153	229631	195134	135752	185599	125788	218779	213226
3	286203	453011	243954	359875	329145	14351	271848	233010	184428	128740	179591	132673	225563	220445
4	275281	416274	242869	373135	316870	14071	254961	223552	184100	125179	175734	121886	218809	202750
5	270072	428103	241425	366973	301189	13395	260714	221734	185052	121028	165543	120408	216868	197206
6	19153	44800	20731	27364	23812	13548	246672	212868	175514	120588	169870	122604	207052	186567
7	30333	66016	29943	35404	32176	13007	265635	217956	172055	119258	171282	127912	208288	183185
8	31910	77481	32566	40139	37471	13617	236755	205123	172245	119227	165749	122152	218254	184392
9	36948	76880	34548	41048	40982	13134	251047	207465	175614	120256	173696	122710	226315	182942
10	36595	78613	36784	48009	43531	15216	244660	216592	174509	113406	166003	127277	217477	183243
11	42269	83293	35763	48347	43290	13173	251224	207931	170302	112503	167339	126491	228036	181731
12	42078	81832	34667	48126	45444	13288	240252	218708	182025	111248	176522	126713	216559	191241
13	41845	83624	33971	51409	45597	13450	240291	213738	182593	108649	169168	121956	222660	185492
14	56623	116661	40764	63890	59430	12923	240587	214766	190875	109206	180930	124566	227156	190589
15	77175	132458	46384	87197	66096	13601	251524	230835	190442	162279	194897	123760	247411	192174
16	100045	157230	50507	88978	75152	16481	278714	236798	202505	172421	210313	124384	254751	205298
17	120901	175837	50354	92254	84603	16447	295357	263700	224517	167459	207367	146153	256158	213275
18	125453	167561	55190	104104	75159	14522	277701	244379	204871	164769	209192	152693	250736	212830
19	127740	173365	52905	106499	92738	15238	267693	236247	195099	141632	193236	157968	248779	190067
20	128905	172290	49355	108621	94686	14173	256657	215396	200572	146764	182218	142356	175330	189083
21	138202	174547	55809	114184	96387	14736	250560	215897	179613	147042	175236	131428	233030	182314
22	142923	171609	54244	123593	96740	14538	267691	209850	180391	154200	178357	145175	238115	174396
23	141988	189715	58777	134919	103323	15467	278354	218558	178233	150366	189820	154422	235714	185684
24	150706	194817	62607	133593	107737	14832	287845	218129	195800	147319	179667	157371	231737	184307
25	156380	190229	65189	150540	110469	14715	293017	244145	216642	154504	182233	160234	245878	196947
26	169695	189824	67868	156780	122113	16279	292589	250002	222754	161953	195184	157647	266058	211105
27	178109	195141	73273	162645	130614	15298	271235	247867	222322	141808	215685	157678	254333	200621
time
0	293306	444673	254871	366727	314726	261860	204169	170644	120597	172425	121040	216750	199991
30	281495	451994	242742	367162	313048	255519	216997	182500	123118	172965	113154	206145	200592
60	271852	438660	229603	345524	314794	257497	218659	170077	114389	165240	118322	211212	206094
90	261210	402203	228798	359064	302799	240890	209481	170029	111108	161663	107815	204738	188679
120	256677	414708	228030	353578	287794	247319	208339	171657	107633	152148	107013	203473	183811
130	5605	31252	7183	13816	10264	233124	199320	161966	107040	156322	109056	193504	173019
160	17326	53009	16936	22397	19169	252628	204949	159048	106251	158275	114905	195281	170178
190	18293	63864	18949	26522	23854	223138	191506	158628	105610	152132	108535	204637	170775
220	23814	63746	21414	27914	27848	237913	194331	162480	107122	160562	109576	213181	169808
250	21379	63397	21568	32793	28315	229444	201376	159293	98190	150787	112061	202261	168027
280	29096	70120	22590	35174	30117	238051	194758	157129	99330	154166	113318	214863	168558
310	28790	68544	21379	34838	32156	226964	205420	168737	97960	163234	113425	203271	177953
320	28395	70174	20521	37959	32147	226841	200288	169143	95199	155718	108506	209210	172042
620	43700	103738	27841	50967	46507	227664	201843	177952	96283	168007	111643	214233	177666
920	63574	118857	32783	73596	52495	237923	217234	176841	148678	181296	110159	233810	178573
1220	83564	140749	34026	72497	58671	262233	220317	186024	155940	193832	107903	238270	188817
1520	104454	159390	33907	75807	68156	278910	247253	208070	151012	190920	129706	239711	196828
1820	110931	153039	40668	89582	60637	263179	229857	190349	150247	194670	138171	236214	198308
2120	112502	158127	37667	91261	77500	252455	221009	179861	126394	177998	142730	233541	174829
2420	114732	158117	35182	94448	80513	242484	201223	186399	132591	168045	128183	161157	174910
2720	123466	159811	41073	99448	81651	235824	201161	164877	132306	160500	116692	218294	167578
3020	128385	157071	39706	109055	82202	253153	195312	165853	139662	163819	130637	223577	159858
3320	126521	174248	43310	119452	87856	262887	203091	162766	134899	174353	138955	220247	170217
3620	135874	179985	47775	118761	92905	273013	203297	180968	132487	164835	142539	216905	169475
3920	141665	175514	50474	135825	95754	278302	229430	201927	139789	167518	145519	231163	182232
4220	153416	173545	51589	140501	105834	276310	233723	206475	145674	178905	141368	249779	194826
4520	162811	179843	57975	147347	115316	255937	232569	207024	126510	200387	142380	239035	185323
	AVERAGE OF PREBLEACH
	272908	430448	236809	358411	306632	252617	211529	172981	115369	164888	113469	208464	195833
NORMALIZED DATA
time	b1	b2	b3	b4	b5	c1	c2	c3	c4	c5	c6	c7	c8	Average of controls
120	1	1	1	1	1	1	1	1	1	1	1	1	1	1
130	0.0205381	0.0726035	0.0303325	0.0385479	0.0334733	0.922836	0.942282	0.93632	0.927806	0.948048	0.96111	0.928239	0.883501	0.931268
160	0.0634866	0.123149	0.0715176	0.0624897	0.0625146	1.00004	0.968893	0.919451	0.920967	0.959893	1.01266	0.936763	0.868994	0.948458
190	0.0670299	0.148366	0.0800181	0.0739988	0.0777935	0.883306	0.905342	0.917023	0.915411	0.922637	0.956518	0.981644	0.872042	0.91924
220	0.0872602	0.148092	0.0904274	0.0778827	0.0908189	0.941793	0.918697	0.939292	0.928516	0.973763	0.965693	1.02263	0.867104	0.944686
250	0.0783378	0.147282	0.0910777	0.0914955	0.0923419	0.908268	0.952002	0.920868	0.851095	0.91448	0.987593	0.970246	0.85801	0.92032
280	0.106615	0.1629	0.0953934	0.0981387	0.0982186	0.94234	0.920715	0.908358	0.860977	0.934973	0.998671	1.0307	0.860721	0.932182
310	0.105493	0.159239	0.0902796	0.0972013	0.104868	0.898451	0.97112	0.975463	0.849102	0.989968	0.999614	0.975091	0.908696	0.945938
320	0.104046	0.163026	0.0866564	0.105909	0.104839	0.897964	0.946858	0.97781	0.82517	0.944385	0.956263	1.00358	0.878512	0.928818
620	0.160127	0.241	0.117567	0.142203	0.15167	0.901222	0.95421	1.02873	0.834566	1.01891	0.983909	1.02768	0.90723	0.957058
920	0.23295	0.276124	0.138437	0.20534	0.171199	0.941833	1.02697	1.02231	1.28872	1.09951	0.970831	1.12159	0.911862	1.04795
1220	0.306198	0.326983	0.143686	0.202273	0.19134	1.03807	1.04155	1.0754	1.35166	1.17554	0.950949	1.14298	0.964172	1.09254
1520	0.382744	0.370289	0.143183	0.211509	0.222273	1.10408	1.16888	1.20285	1.30895	1.15788	1.1431	1.14989	1.00508	1.15509
1820	0.406478	0.355535	0.171733	0.249942	0.197752	1.04181	1.08665	1.1004	1.30232	1.18062	1.2177	1.13312	1.01264	1.13441
2120	0.412234	0.367355	0.159061	0.254627	0.252746	0.999359	1.04482	1.03977	1.09556	1.07951	1.25788	1.1203	0.892744	1.06624
2420	0.420405	0.367332	0.148567	0.263519	0.262572	0.959888	0.951279	1.07757	1.14928	1.01915	1.12968	0.77307	0.893157	0.994132
2720	0.452409	0.371267	0.173444	0.277469	0.266283	0.933524	0.950985	0.953149	1.14681	0.973387	1.02841	1.04716	0.855717	0.986141
3020	0.470433	0.364902	0.167671	0.304274	0.26808	1.00212	0.923334	0.958791	1.21057	0.993516	1.1513	1.0725	0.816296	1.01605
3320	0.463603	0.404807	0.18289	0.333282	0.286519	1.04065	0.960109	0.940945	1.16928	1.0574	1.22461	1.05652	0.869193	1.03984
3620	0.497875	0.418135	0.201745	0.331354	0.302985	1.08074	0.961083	1.04617	1.14838	0.999677	1.2562	1.04049	0.865404	1.04977
3920	0.519094	0.407748	0.213142	0.378964	0.312276	1.10168	1.08463	1.16733	1.21167	1.01595	1.28246	1.10889	0.930546	1.11289
4220	0.562153	0.403173	0.217851	0.392011	0.34515	1.09379	1.10492	1.19363	1.26268	1.08501	1.24588	1.19819	0.994856	1.14737
4520	0.596578	0.417805	0.244818	0.411112	0.376073	1.01314	1.09947	1.1968	1.09657	1.21529	1.25479	1.14665	0.94633	1.12113
CORRECTED DATA
Time	b1	b2	b3	b4	b5
120	1	1	1	1	1
130	0.0220539	0.077962	0.0325712	0.041393	0.0359438
160	0.0669367	0.129841	0.0754041	0.0658856	0.0659119
190	0.0729188	0.161401	0.0870481	0.0805	0.0846281
220	0.0923695	0.156764	0.0957222	0.0824429	0.0961366
250	0.0851201	0.160033	0.098963	0.099417	0.100337
280	0.114371	0.174752	0.102334	0.105279	0.105364
310	0.111523	0.16834	0.0954392	0.102756	0.110862
320	0.11202	0.175519	0.0932975	0.114026	0.112874
620	0.167312	0.251814	0.122843	0.148583	0.158476
920	0.222291	0.263489	0.132102	0.195944	0.163365
1220	0.280263	0.299287	0.131515	0.185141	0.175133
1520	0.331355	0.320572	0.123958	0.18311	0.192429
1820	0.358318	0.31341	0.151386	0.220329	0.174322
2120	0.386624	0.344532	0.149179	0.238808	0.237044
2420	0.422887	0.3695	0.149444	0.265074	0.264122
2720	0.458767	0.376485	0.175881	0.281369	0.270025
3020	0.463	0.359136	0.165022	0.299466	0.263844
3320	0.445841	0.389297	0.175883	0.320513	0.275542
3620	0.474272	0.398312	0.192181	0.315645	0.288621
3920	0.466437	0.366385	0.191521	0.340522	0.280599
4220	0.48995	0.35139	0.18987	0.341661	0.300819
4520	0.532122	0.372664	0.218367	0.366694	0.335441
	Normalize the bouton fluorescent right after bleaching to 0
Recovery Time_(sec)	b1	b2	b3	b4	b5
0	0	0	0	0	0
30	0.045895	0.0562654	0.044275	0.0255503	0.0310854
60	0.052012	0.0904943	0.0563111	0.0407957	0.0504994
90	0.0719013	0.0854646	0.0652771	0.0428225	0.062437
120	0.0644884	0.0890104	0.0686271	0.0605296	0.0667937
150	0.0943992	0.104974	0.0721111	0.0666442	0.0720087
180	0.0914863	0.0980195	0.0649847	0.0640132	0.0777111
190	0.0919948	0.105806	0.0627709	0.0757691	0.0797979
490	0.148534	0.188552	0.0933106	0.111819	0.1271
790	0.204753	0.201214	0.102882	0.161224	0.132172
1090	0.264032	0.240039	0.102275	0.149955	0.144379
1390	0.316276	0.263124	0.0944641	0.147837	0.16232
1690	0.343847	0.255356	0.122815	0.186662	0.143537
1990	0.372791	0.28911	0.120534	0.205939	0.208598
2290	0.409872	0.316188	0.120808	0.23334	0.236685
2590	0.446561	0.323764	0.148135	0.250338	0.242809
2890	0.45089	0.304949	0.13691	0.269217	0.236398
3190	0.433344	0.33766	0.148137	0.291172	0.248531
3490	0.462416	0.347436	0.164983	0.286095	0.262098
3790	0.454404	0.312811	0.164301	0.312045	0.253777
4090	0.478448	0.296547	0.162595	0.313234	0.27475
4390	0.521571	0.31962	0.192051	0.339348	0.310663

## Sheet: VG1 25May F1
time	b1	b2	b3	b4	b5	background	c1	c2	c3	c4	c5	c6	c7	c8
0	417866	462726	470401	454292	351382	11789	211059	402743	225647	176260	300062	296743	152087	380796
30	454071	456460	503588	465234	348223	12693	205118	418675	241792	170165	311338	307248	146661	403339
60	435219	474986	467267	474235	343643	12603	206528	408803	231080	179275	306654	286398	148904	379570
90	439569	466781	482364	477879	343575	11875	212508	402311	235303	169263	308102	306203	153580	358475
120	448544	483177	482225	468510	351855	12697	213072	402606	225487	166998	313862	278859	153892	372080
130	31444	31602	36022	47652	34173	12069	203983	410053	240367	157408	291844	289786	145347	368091
160	45288	42282	58477	73089	46864	11908	204929	403257	239624	156288	296504	279433	139635	350368
190	52747	45352	63933	86416	51686	11820	206478	402640	238600	165513	300838	280389	149900	353506
220	55925	73057	70861	87369	57976	12123	205514	386158	227284	153357	284109	280173	144527	339785
250	58591	74655	76332	104990	57411	11928	207980	392077	233352	164164	304659	274092	149171	337707
280	58777	82226	81733	101971	59800	11412	206270	401196	244195	163593	294263	284960	149495	331406
310	58156	80704	86768	105811	61823	11782	205604	400677	246927	153722	297768	276367	149966	329832
320	58996	75353	89963	106531	59836	11810	210768	407367	247111	156776	302228	274591	150969	325356
620	80358	130113	126704	117980	65180	12310	213371	417834	258144	159644	334823	289260	164474	327704
920	111625	152104	141049	181176	82446	12792	229840	448865	262467	180249	367045	343162	199328	346807
1220	128955	204125	168562	197398	107016	13805	249611	430302	293637	213475	405845	379345	177136	378830
1520	142151	241087	188043	228035	123240	13338	243252	450812	289193	215685	400596	360028	159599	385080
1820	145368	236356	198618	260464	126026	12827	242573	398080	271669	223418	367108	323803	152226	378677
2120	187545	258945	216483	311616	135239	14777	272263	428819	277043	219917	385046	326297	167417	428469
2420	191488	240152	217631	314877	155376	13999	256565	418732	281950	211545	400566	357958	174632	413738
2720	225391	232113	196557	318363	149420	15037	259603	409590	279734	212970	410550	374551	164216	419239
3020	249659	289508	227828	308028	149195	14790	242431	412116	307861	219897	447904	374743	198411	394404
3320	262924	322952	214746	356168	169919	14969	277300	408083	306980	212422	426527	404574	203647	456852
3620	300826	311834	241224	408503	209030	15574	270751	379247	342547	231755	458594	436842	193657	454192
3920	304686	317627	244253	433298	219684	15162	263358	396608	343434	251519	448502	427132	185699	459664
4220	304179	322661	177755	388508	231788	14835	253389	390240	311128	242711	428833	403152	170117	448538
4520	285401	303826	178828	376886	234483	15074	268802	320493	311860	238131	397050	418192	155967	425891
time
0	406077	450937	458612	442503	339593	199270	390954	213858	164471	288273	284954	140298	369007
30	441378	443767	490895	452541	335530	192425	405982	229099	157472	298645	294555	133968	390646
60	422616	462383	454664	461632	331040	193925	396200	218477	166672	294051	273795	136301	366967
90	427694	454906	470489	466004	331700	200633	390436	223428	157388	296227	294328	141705	346600
120	435847	470480	469528	455813	339158	200375	389909	212790	154301	301165	266162	141195	359383
130	19375	19533	23953	35583	22104	191914	397984	228298	145339	279775	277717	133278	356022
160	33380	30374	46569	61181	34956	193021	391349	227716	144380	284596	267525	127727	338460
190	40927	33532	52113	74596	39866	194658	390820	226780	153693	289018	268569	138080	341686
220	43802	60934	58738	75246	45853	193391	374035	215161	141234	271986	268050	132404	327662
250	46663	62727	64404	93062	45483	196052	380149	221424	152236	292731	262164	137243	325779
280	47365	70814	70321	90559	48388	194858	389784	232783	152181	282851	273548	138083	319994
310	46374	68922	74986	94029	50041	193822	388895	235145	141940	285986	264585	138184	318050
320	47186	63543	78153	94721	48026	198958	395557	235301	144966	290418	262781	139159	313546
620	68048	117803	114394	105670	52870	201061	405524	245834	147334	322513	276950	152164	315394
920	98833	139312	128257	168384	69654	217048	436073	249675	167457	354253	330370	186536	334015
1220	115150	190320	154757	183593	93211	235806	416497	279832	199670	392040	365540	163331	365025
1520	128813	227749	174705	214697	109902	229914	437474	275855	202347	387258	346690	146261	371742
1820	132541	223529	185791	247637	113199	229746	385253	258842	210591	354281	310976	139399	365850
2120	172768	244168	201706	296839	120462	257486	414042	262266	205140	370269	311520	152640	413692
2420	177489	226153	203632	300878	141377	242566	404733	267951	197546	386567	343959	160633	399739
2720	210354	217076	181520	303326	134383	244566	394553	264697	197933	395513	359514	149179	404202
3020	234869	274718	213038	293238	134405	227641	397326	293071	205107	433114	359953	183621	379614
3320	247955	307983	199777	341199	154950	262331	393114	292011	197453	411558	389605	188678	441883
3620	285252	296260	225650	392929	193456	255177	363673	326973	216181	443020	421268	178083	438618
3920	289524	302465	229091	418136	204522	248196	381446	328272	236357	433340	411970	170537	444502
4220	289344	307826	162920	373673	216953	238554	375405	296293	227876	413998	388317	155282	433703
4520	270327	288752	163754	361812	219409	253728	305419	296786	223057	381976	403118	140893	410817
	AVERAGE OF PREBLEACH
	426722	456495	468838	455699	335404	197326	394696	219530	160061	295672	282759	138693	366521
NORMALIZED DATA
time	b1	b2	b3	b4	b5	c1	c2	c3	c4	c5	c6	c7	c8	Average of controls
120	1	1	1	1	1	1	1	1	1	1	1	1	1	1
130	0.0454042	0.0427891	0.0510902	0.0780845	0.0659026	0.972575	1.00833	1.03994	0.908024	0.946234	0.982169	0.960954	0.971356	0.973698
160	0.0782242	0.0665375	0.0993286	0.134258	0.104221	0.978185	0.99152	1.03729	0.902032	0.962539	0.946124	0.920931	0.923441	0.957757
190	0.0959101	0.0734554	0.111154	0.163696	0.11886	0.986481	0.990179	1.03302	0.960216	0.977495	0.949817	0.995577	0.932242	0.978129
220	0.102648	0.133482	0.125284	0.165122	0.13671	0.98006	0.947653	0.980097	0.882377	0.91989	0.947981	0.954652	0.89398	0.938336
250	0.109352	0.13741	0.13737	0.204218	0.135607	0.993546	0.963143	1.00863	0.951114	0.990052	0.927165	0.989542	0.888842	0.964004
280	0.110997	0.155126	0.14999	0.198726	0.144268	0.987495	0.987554	1.06037	0.95077	0.956637	0.967425	0.995599	0.873059	0.972363
310	0.108675	0.150981	0.15994	0.20634	0.149196	0.982245	0.985302	1.07113	0.886788	0.96724	0.935727	0.996327	0.867755	0.961564
320	0.110578	0.139198	0.166695	0.207859	0.143188	1.00827	1.00218	1.07184	0.905693	0.98223	0.929347	1.00336	0.855466	0.969798
620	0.159467	0.25806	0.243995	0.231886	0.157631	1.01893	1.02743	1.11982	0.920488	1.09078	0.979457	1.09713	0.860508	1.01432
920	0.23161	0.305178	0.273564	0.369507	0.207672	1.09995	1.10483	1.13731	1.04621	1.19813	1.16838	1.34495	0.911313	1.12638
1220	0.269848	0.416916	0.330087	0.402883	0.277906	1.19501	1.05523	1.27468	1.24746	1.32593	1.29276	1.17764	0.995919	1.19558
1520	0.301866	0.498908	0.372634	0.471138	0.32767	1.16515	1.10838	1.25657	1.26419	1.30975	1.2261	1.05456	1.01425	1.17487
1820	0.310602	0.489664	0.39628	0.543423	0.3375	1.1643	0.976075	1.17907	1.31569	1.19822	1.09979	1.00509	0.99817	1.11705
2120	0.404872	0.534876	0.430226	0.651393	0.359155	1.30488	1.04901	1.19467	1.28164	1.2523	1.10172	1.10056	1.1287	1.17668
2420	0.415936	0.495412	0.434334	0.660257	0.421512	1.22927	1.02543	1.22056	1.23419	1.30742	1.21644	1.15819	1.09063	1.18527
2720	0.492953	0.475528	0.38717	0.665629	0.40066	1.2394	0.999637	1.20574	1.23661	1.33767	1.27145	1.0756	1.10281	1.18362
3020	0.550402	0.601799	0.454396	0.643491	0.400725	1.15363	1.00666	1.33499	1.28143	1.46485	1.273	1.32393	1.03572	1.23428
3320	0.581069	0.67467	0.426111	0.748738	0.46198	1.32943	0.995991	1.33016	1.23361	1.39194	1.37787	1.3604	1.20562	1.27813
3620	0.668472	0.648989	0.481297	0.862256	0.576785	1.29318	0.9214	1.48942	1.35062	1.49835	1.48985	1.284	1.19671	1.31544
3920	0.678483	0.662582	0.488636	0.917571	0.609778	1.2578	0.966429	1.49534	1.47667	1.46561	1.45697	1.2296	1.21276	1.32015
4220	0.678061	0.674326	0.347498	0.82	0.64684	1.20894	0.951124	1.34967	1.42368	1.40019	1.37332	1.11961	1.1833	1.25123
4520	0.633496	0.632542	0.349277	0.793972	0.654163	1.28583	0.773808	1.35191	1.39358	1.29189	1.42566	1.01586	1.12086	1.20742
CORRECTED DATA
Time	b1	b2	b3	b4	b5			Filter out due to large abrupt change or wrong targeting.
120	1	1	1	1	1
130	0.0466307	0.043945	0.0524703	0.0801938	0.0676828
160	0.0816743	0.0694722	0.10371	0.140179	0.108817
190	0.0980547	0.0750979	0.113639	0.167356	0.121517
220	0.109393	0.142254	0.133517	0.175973	0.145694
250	0.113435	0.142541	0.142499	0.211844	0.14067
280	0.114152	0.159535	0.154253	0.204374	0.148368
310	0.113019	0.157016	0.166333	0.214588	0.15516
320	0.114021	0.143533	0.171887	0.214332	0.147648
620	0.157216	0.254417	0.240551	0.228613	0.155406
920	0.205622	0.270936	0.242869	0.328047	0.18437
1220	0.225704	0.348715	0.276089	0.336977	0.232445
1520	0.256936	0.42465	0.317171	0.401013	0.278899
1820	0.278056	0.438354	0.354755	0.48648	0.302135
2120	0.344079	0.454562	0.365626	0.553584	0.305226
2420	0.350922	0.417975	0.366444	0.557053	0.355627
2720	0.41648	0.401759	0.327108	0.562369	0.338505
3020	0.445931	0.487572	0.368147	0.52135	0.324664
3320	0.454625	0.527858	0.333387	0.585809	0.361451
3620	0.508173	0.493362	0.365882	0.655489	0.438473
3920	0.513946	0.5019	0.370138	0.695053	0.461902
4220	0.541917	0.538931	0.277725	0.655357	0.516965
4520	0.524667	0.523877	0.289274	0.657575	0.541784
	Normalize the bouton fluorescent right after bleaching to 0
Recovery Time_(sec)	b1	b2	b3	b4	b5
0	0	0	0	0	0
30	0.0367576	0.0267005	0.0540767	0.0652152	0.0441207
60	0.0539392	0.0325849	0.064556	0.0947617	0.0577427
90	0.0658322	0.102828	0.0855353	0.10413	0.0836742
120	0.0700722	0.103128	0.0950141	0.143128	0.0782859
150	0.0708238	0.120903	0.107419	0.135007	0.0865428
180	0.0696353	0.118268	0.120168	0.146112	0.0938276
190	0.0706869	0.104165	0.126029	0.145833	0.08577
490	0.115994	0.220147	0.198496	0.161359	0.0940913
790	0.166768	0.237424	0.200942	0.269463	0.125159
1090	0.187832	0.318778	0.236002	0.27917	0.176723
1390	0.220592	0.398204	0.279359	0.34879	0.22655
1690	0.242744	0.412538	0.319024	0.441708	0.251472
1990	0.311997	0.429491	0.330497	0.514663	0.254788
2290	0.319174	0.391223	0.33136	0.518435	0.308847
2590	0.387939	0.374261	0.289846	0.524213	0.290483
2890	0.41883	0.464018	0.333158	0.479619	0.275637
3190	0.42795	0.506156	0.296473	0.549697	0.315094
3490	0.484117	0.470075	0.330768	0.625452	0.397708
3790	0.490172	0.479005	0.335259	0.668466	0.422838
4090	0.519511	0.517738	0.237729	0.625309	0.481898
4390	0.501418	0.501992	0.249917	0.62772	0.508519

## Sheet: VG1 28May F1
time	b1	b2	b3	b4	b5	background	c1	c2	c3	c4	c5	c6	c7	c8
0	363003	295689	519030	326587	347865	13156	219128	636897	141542	175287	234125	282844	241584	319388
30	350346	303713	446315	302311	342146	11990	217986	604617	155792	160183	231334	290494	232384	295737
60	348006	272931	471176	302208	330513	13202	211243	607199	162720	154887	224889	275717	241537	310800
90	307663	258431	470821	279704	333606	14405	218124	613950	149945	160783	236320	283150	242240	299858
120	315137	261908	405540	276529	319112	12547	218506	599775	138195	168251	222577	298812	239509	289714
130	27542	28611	37798	25272	31474	13927	216982	578098	143681	156407	204679	296972	241183	282865
160	40043	36201	73265	36724	39676	13598	226271	560847	147478	160786	200507	281410	235145	266987
190	41512	45224	59588	42781	46849	12412	213132	575889	142180	156628	192392	265262	238275	264209
220	44644	50109	63405	41453	50189	13645	206626	579152	150144	152518	197888	253498	232411	267842
250	58589	50952	71753	44624	51227	13504	202499	559584	155407	160873	192969	263680	235829	259487
280	58450	55353	64969	53714	50581	13564	213403	545116	143421	153293	196452	248225	231310	267697
310	66200	55014	64778	56697	57985	12889	199785	545682	140003	154801	189505	262838	245996	253528
320	65204	53757	60378	56478	53767	12619	209579	538234	150165	154352	188672	242972	243163	246426
620	102099	73340	105927	88269	88357	12107	206163	554359	131878	150414	193270	254958	239665	258488
920	144457	79988	94293	105111	105445	14611	219596	545834	171645	144095	202876	270496	261366	282323
1220	115555	102801	120128	116451	135531	14109	224844	529303	193032	142221	193401	254224	265723	288935
1520	98115	73416	124500	101978	163218	13360	225763	548889	197794	152026	199242	253027	275149	274736
1820	97989	92271	134591	117028	175723	12679	216637	571383	189706	152987	195393	258475	264721	274563
2120	79341	91368	131974	118052	165794	14236	229049	573202	201022	170223	187462	269079	283321	292877
2420	86499	120176	124747	141013	154906	13177	225889	558655	173646	153073	206076	266428	277853	308048
2720	105813	97527	156464	149608	156344	13278	238889	543010	174926	158457	195582	256418	275558	301803
3020	113402	102991	138688	153732	156965	13183	215959	577337	209943	173276	184471	267013	258481	298908
3320	127398	91763	169566	165616	163607	13538	214849	553106	145210	169829	180335	292495	273382	291465
3620	108069	90575	224330	186458	159834	13427	200898	589739	146912	179175	193921	270909	264336	289996
3920	123233	97211	153730	194088	176596	13283	205393	557062	134497	168529	191127	278139	291353	306212
4220	132298	101160	178180	193355	200196	12653	207312	584066	144094	178947	194279	248506	299939	295999
4520	126449	120249	211713	228316	214013	12629	209661	507911	138394	190373	192620	280886	282529	268739
time
0	349847	282533	505874	313431	334709	205972	623741	128386	162131	220969	269688	228428	306232
30	338356	291723	434325	290321	330156	205996	592627	143802	148193	219344	278504	220394	283747
60	334804	259729	457974	289006	317311	198041	593997	149518	141685	211687	262515	228335	297598
90	293258	244026	456416	265299	319201	203719	599545	135540	146378	221915	268745	227835	285453
120	302590	249361	392993	263982	306565	205959	587228	125648	155704	210030	286265	226962	277167
130	13615	14684	23871	11345	17547	203055	564171	129754	142480	190752	283045	227256	268938
160	26445	22603	59667	23126	26078	212673	547249	133880	147188	186909	267812	221547	253389
190	29100	32812	47176	30369	34437	200720	563477	129768	144216	179980	252850	225863	251797
220	30999	36464	49760	27808	36544	192981	565507	136499	138873	184243	239853	218766	254197
250	45085	37448	58249	31120	37723	188995	546080	141903	147369	179465	250176	222325	245983
280	44886	41789	51405	40150	37017	199839	531552	129857	139729	182888	234661	217746	254133
310	53311	42125	51889	43808	45096	186896	532793	127114	141912	176616	249949	233107	240639
320	52585	41138	47759	43859	41148	196960	525615	137546	141733	176053	230353	230544	233807
620	89992	61233	93820	76162	76250	194056	542252	119771	138307	181163	242851	227558	246381
920	129846	65377	79682	90500	90834	204985	531223	157034	129484	188265	255885	246755	267712
1220	101446	88692	106019	102342	121422	210735	515194	178923	128112	179292	240115	251614	274826
1520	84755	60056	111140	88618	149858	212403	535529	184434	138666	185882	239667	261789	261376
1820	85310	79592	121912	104349	163044	203958	558704	177027	140308	182714	245796	252042	261884
2120	65105	77132	117738	103816	151558	214813	558966	186786	155987	173226	254843	269085	278641
2420	73322	106999	111570	127836	141729	212712	545478	160469	139896	192899	253251	264676	294871
2720	92535	84249	143186	136330	143066	225611	529732	161648	145179	182304	243140	262280	288525
3020	100219	89808	125505	140549	143782	202776	564154	196760	160093	171288	253830	245298	285725
3320	113860	78225	156028	152078	150069	201311	539568	131672	156291	166797	278957	259844	277927
3620	94642	77148	210903	173031	146407	187471	576312	133485	165748	180494	257482	250909	276569
3920	109950	83928	140447	180805	163313	192110	543779	121214	155246	177844	264856	278070	292929
4220	119645	88507	165527	180702	187543	194659	571413	131441	166294	181626	235853	287286	283346
4520	113820	107620	199084	215687	201384	197032	495282	125765	177744	179991	268257	269900	256110
	AVERAGE OF PREBLEACH
	323771	265474	449516	284408	321588	203937	599428	136579	150818	216789	273143	226391	290039
NORMALIZED DATA
time	b1	b2	b3	b4	b5	c1	c2	c3	c4	c5	c6	c7	c8	Average of controls
120	1	1	1	1	1	1	1	1	1	1	1	1	1	1
130	0.0420513	0.0553123	0.0531037	0.0398899	0.0545635	0.995673	0.941183	0.95003	0.944714	0.879897	1.03625	1.00382	0.927246	0.959852
160	0.0816781	0.0851419	0.132736	0.0813128	0.0810912	1.04283	0.912953	0.98024	0.97593	0.86217	0.980481	0.978604	0.873636	0.950856
190	0.0898783	0.123598	0.104948	0.10678	0.107084	0.984224	0.940025	0.950133	0.956224	0.830208	0.925704	0.997669	0.868148	0.931542
220	0.0957436	0.137354	0.110697	0.0977751	0.113636	0.946276	0.943412	0.999416	0.920797	0.849872	0.878121	0.96632	0.876422	0.92258
250	0.13925	0.141061	0.129581	0.10942	0.117302	0.92673	0.911002	1.03898	0.97713	0.827833	0.915914	0.982041	0.848102	0.928467
280	0.138635	0.157413	0.114356	0.141171	0.115107	0.979904	0.886766	0.950784	0.926473	0.843622	0.859113	0.961815	0.876202	0.910585
310	0.164657	0.158678	0.115433	0.154032	0.140229	0.916438	0.888836	0.930701	0.940947	0.814691	0.915083	1.02967	0.829677	0.908255
320	0.162414	0.15496	0.106245	0.154212	0.127952	0.965787	0.876862	1.00708	0.939761	0.812094	0.843341	1.01835	0.806122	0.908674
620	0.27795	0.230655	0.208713	0.267792	0.237104	0.951547	0.904616	0.876937	0.917044	0.835665	0.889097	1.00516	0.849474	0.903692
920	0.401043	0.246265	0.177262	0.318205	0.282454	1.00514	0.886217	1.14977	0.858544	0.868425	0.936816	1.08995	0.923019	0.964735
1220	0.313326	0.334089	0.235851	0.359842	0.37757	1.03333	0.859477	1.31003	0.849447	0.827035	0.87908	1.11141	0.947547	0.977171
1520	0.261775	0.226221	0.247243	0.311588	0.465993	1.04151	0.893401	1.35039	0.919425	0.857433	0.87744	1.15636	0.901174	0.999641
1820	0.263489	0.29981	0.271207	0.366899	0.506996	1.0001	0.932063	1.29615	0.930312	0.84282	0.899879	1.1133	0.902926	0.989695
2120	0.201083	0.290544	0.261921	0.365025	0.471279	1.05333	0.9325	1.36761	1.03427	0.799053	0.933001	1.18859	0.960701	1.03363
2420	0.226463	0.403048	0.2482	0.449481	0.440716	1.04303	0.909998	1.17492	0.92758	0.889801	0.927172	1.16911	1.01666	1.00728
2720	0.285804	0.317353	0.318533	0.479347	0.444873	1.10628	0.88373	1.18355	0.962609	0.840928	0.890155	1.15853	0.994779	1.00257
3020	0.309537	0.338293	0.2792	0.494181	0.447099	0.994305	0.941155	1.44063	1.0615	0.790114	0.929292	1.08352	0.985125	1.0282
3320	0.351668	0.294661	0.347102	0.534718	0.466649	0.987122	0.900139	0.964073	1.03629	0.769398	1.02128	1.14777	0.958239	0.973039
3620	0.292312	0.290604	0.469178	0.60839	0.455262	0.919258	0.961437	0.977348	1.09899	0.832579	0.942662	1.1083	0.953557	0.974267
3920	0.339592	0.316143	0.31244	0.635724	0.507832	0.942005	0.907164	0.887502	1.02936	0.820355	0.969659	1.22827	1.00996	0.974285
4220	0.369536	0.333392	0.368234	0.635362	0.583177	0.954504	0.953264	0.962382	1.10261	0.837801	0.863477	1.26898	0.976922	0.989993
4520	0.351545	0.405387	0.442885	0.758372	0.626217	0.96614	0.826258	0.920824	1.17853	0.830259	0.98211	1.19219	0.883018	0.972416
CORRECTED DATA
Time	b1	b2	b3	b4	b5			Filter out due to large abrupt change or wrong targeting.
120	1	1	1	1	1
130	0.0438102	0.0576259	0.0553249	0.0415584	0.0568458
160	0.0858995	0.0895424	0.139596	0.0855154	0.0852823
190	0.0964834	0.132681	0.112661	0.114627	0.114954
220	0.103778	0.148881	0.119986	0.10598	0.123172
250	0.149978	0.151929	0.139565	0.117851	0.12634
280	0.152248	0.17287	0.125585	0.155033	0.12641
310	0.181289	0.174707	0.127093	0.169592	0.154394
320	0.178738	0.170535	0.116923	0.169711	0.140812
620	0.307571	0.255236	0.230956	0.29633	0.262373
920	0.415703	0.255267	0.183741	0.329837	0.292779
1220	0.320646	0.341894	0.241361	0.368249	0.386391
1520	0.261869	0.226303	0.247332	0.3117	0.466161
1820	0.266232	0.302932	0.274031	0.37072	0.512275
2120	0.194541	0.281091	0.253399	0.353148	0.455946
2420	0.224825	0.400134	0.246405	0.446231	0.437529
2720	0.285071	0.316539	0.317717	0.478118	0.443733
3020	0.301046	0.329013	0.271541	0.480625	0.434835
3320	0.361412	0.302826	0.35672	0.549534	0.479579
3620	0.300032	0.29828	0.48157	0.62446	0.467287
3920	0.348555	0.324488	0.320687	0.652504	0.521236
4220	0.373271	0.336762	0.371956	0.641785	0.589072
4520	0.361517	0.416887	0.455448	0.779885	0.64398
	Normalize the bouton fluorescent right after bleaching to 0
Recovery Time_(sec)	b1	b2	b3	b4	b5
0	0	0	0	0	0
30	0.0440177	0.0338682	0.0892067	0.045863	0.0301505
60	0.0550866	0.0796444	0.0606939	0.0762368	0.0616101
90	0.0627155	0.0968348	0.0684481	0.0672151	0.0703238
120	0.111032	0.100069	0.0891736	0.0796002	0.0736823
150	0.113406	0.122291	0.0743754	0.118395	0.0737567
180	0.143778	0.12424	0.0759713	0.133585	0.103427
190	0.141109	0.119813	0.065206	0.133709	0.0890272
490	0.275846	0.209694	0.185917	0.265819	0.217915
790	0.388932	0.209727	0.135937	0.300778	0.250154
1090	0.28952	0.301651	0.196932	0.340856	0.349407
1390	0.228049	0.178991	0.203252	0.281855	0.433985
1690	0.232613	0.260307	0.231515	0.343434	0.482879
1990	0.157637	0.23713	0.209675	0.325101	0.423154
2290	0.189309	0.363452	0.202271	0.42222	0.403628
2590	0.252315	0.274746	0.277759	0.455489	0.410206
2890	0.269021	0.287982	0.228879	0.458105	0.400772
3190	0.332154	0.260194	0.319046	0.530002	0.448213
3490	0.267962	0.25537	0.451208	0.608176	0.435179
3790	0.318707	0.28318	0.280903	0.637436	0.49238
4090	0.344556	0.296205	0.335174	0.626252	0.564304
4390	0.332263	0.38123	0.423556	0.77034	0.622522

## Sheet: VG2 20Feb F2
time	b1	b2	b3	b4	b5	background	c1	c2	c3	c4	c5	c6	c7	c8
0	378629	302007	313534	260522	423779	18085	549713	245082	412223	361373	419461	343182	476162	224737
30	389784	298070	288971	189370	440268	17334	508814	227074	440658	349151	379782	378510	443702	234212
60	411423	302566	303160	247237	415705	19273	499901	227023	410050	341997	394847	347020	445584	261160
90	380895	293111	303606	126059	426585	17415	491920	224607	419067	321430	389189	365090	460956	262133
120	307646	282673	293967	154545	412941	17972	478790	213207	429104	341290	380694	355023	456330	282718
130	53472	30027	59232	27782	62127	18266	455090	204700	394109	320418	359117	304562	305311	250150
160	74115	37775	83845	41762	99457	18799	454077	230183	390172	324344	344826	263398	297634	295266
190	90425	39584	97800	56611	109220	18371	426073	221030	421038	321893	338912	291546	342350	236313
220	86985	46598	98845	44290	115333	18491	428730	206517	423877	316536	327877	292711	295008	255146
250	91104	48266	104434	72279	125633	17600	435644	221277	394861	325430	308853	308407	330651	247720
280	88379	46774	98944	75074	112488	16928	485809	223285	409918	321952	308603	307294	314463	217077
310	99499	63083	95360	73885	138175	19252	486659	242257	409363	309595	347461	304989	309382	200185
320	99933	62524	104022	76539	131722	19723	454626	228286	406382	301253	321985	279748	298391	213186
620	177981	95118	142751	121708	212965	17905	515725	236882	391875	324830	329933	333289	292132	193152
920	190900	82626	218985	146185	281413	17884	441341	231060	390546	316270	330372	319203	351433	268528
1220	206167	112004	303760	190128	283696	18832	468590	304207	422460	313175	352243	276247	388389	262387
1520	269632	102992	247001	201087	301071	17987	460511	237238	433129	331501	329399	358532	382881	252943
1820	303262	101378	256614	200586	320683	17526	448419	262577	428446	291195	306925	373061	333328	256243
2120	301648	109099	302141	160080	360850	18123	400432	303333	461557	295781	267354	363933	323025	305544
2420	279511	106368	333655	200947	428883	18022	405342	307758	456674	295153	299904	343666	333738	281189
2720	318678	117775	341643	220303	425640	16893	385055	348773	455896	303240	275489	350622	340723	327650
3020	330167	128193	366676	245212	482512	18223	365300	322624	470009	320187	278263	411170	335399	288355
3320	332216	133893	398456	239684	512128	17889	470035	298247	485324	261550	292064	378797	354753	320896
3620	398055	142460	462896	231724	533101	17188	368379	278438	453163	279262	244333	381535	373217	297410
3920	322806	139844	513270	238837	526243	18365	379357	277632	423426	274012	265686	384427	413944	305809
4220	367658	126239	501209	254030	615170	18359	460676	305363	475822	300558	302498	410363	373967	332702
4520	365251	133808	356476	238560	551881	18300	421455	290718	462455	328394	293658	384554	378111	306121
time
0	360544	283922	295449	242437	405694	531628	226997	394138	343288	401376	325097	458077	206652
30	372450	280736	271637	172036	422934	491480	209740	423324	331817	362448	361176	426368	216878
60	392150	283293	283887	227964	396432	480628	207750	390777	322724	375574	327747	426311	241887
90	363480	275696	286191	108644	409170	474505	207192	401652	304015	371774	347675	443541	244718
120	289674	264701	275995	136573	394969	460818	195235	411132	323318	362722	337051	438358	264746
130	35206	11761	40966	9516	43861	436824	186434	375843	302152	340851	286296	287045	231884
160	55316	18976	65046	22963	80658	435278	211384	371373	305545	326027	244599	278835	276467
190	72054	21213	79429	38240	90849	407702	202659	402667	303522	320541	273175	323979	217942
220	68494	28107	80354	25799	96842	410239	188026	405386	298045	309386	274220	276517	236655
250	73504	30666	86834	54679	108033	418044	203677	377261	307830	291253	290807	313051	230120
280	71451	29846	82016	58146	95560	468881	206357	392990	305024	291675	290366	297535	200149
310	80247	43831	76108	54633	118923	467407	223005	390111	290343	328209	285737	290130	180933
320	80210	42801	84299	56816	111999	434903	208563	386659	281530	302262	260025	278668	193463
620	160076	77213	124846	103803	195060	497820	218977	373970	306925	312028	315384	274227	175247
920	173016	64742	201101	128301	263529	423457	213176	372662	298386	312488	301319	333549	250644
1220	187335	93172	284928	171296	264864	449758	285375	403628	294343	333411	257415	369557	243555
1520	251645	85005	229014	183100	283084	442524	219251	415142	313514	311412	340545	364894	234956
1820	285736	83852	239088	183060	303157	430893	245051	410920	273669	289399	355535	315802	238717
2120	283525	90976	284018	141957	342727	382309	285210	443434	277658	249231	345810	304902	287421
2420	261489	88346	315633	182925	410861	387320	289736	438652	277131	281882	325644	315716	263167
2720	301785	100882	324750	203410	408747	368162	331880	439003	286347	258596	333729	323830	310757
3020	311944	109970	348453	226989	464289	347077	304401	451786	301964	260040	392947	317176	270132
3320	314327	116004	380567	221795	494239	452146	280358	467435	243661	274175	360908	336864	303007
3620	380867	125272	445708	214536	515913	351191	261250	435975	262074	227145	364347	356029	280222
3920	304441	121479	494905	220472	507878	360992	259267	405061	255647	247321	366062	395579	287444
4220	349299	107880	482850	235671	596811	442317	287004	457463	282199	284139	392004	355608	314343
4520	346951	115508	338176	220260	533581	403155	272418	444155	310094	275358	366254	359811	287821
	AVERAGE OF PREBLEACH
	355660	277670	282632	177531	405840	487812	209383	404205	325032	374779	339749	438531	234976
NORMALIZED DATA
time	b1	b2	b3	b4	b5	c1	c2	c3	c4	c5	c6	c7	c8	Average of controls
120	1	1	1	1	1	1	1	1	1	1	1	1	1	1
130	0.0989879	0.0423561	0.144945	0.053602	0.108075	0.895476	0.890398	0.929834	0.929606	0.909472	0.842669	0.65456	0.98684	0.879857
160	0.155531	0.0683402	0.230144	0.129347	0.198743	0.892307	1.00956	0.918775	0.940045	0.869918	0.71994	0.635839	1.17657	0.895369
190	0.202593	0.0763966	0.281033	0.215399	0.223854	0.835777	0.967888	0.996196	0.933821	0.855281	0.804049	0.738782	0.927507	0.882413
220	0.192583	0.101225	0.284306	0.145321	0.238621	0.840978	0.898001	1.00292	0.91697	0.825516	0.807125	0.630553	1.00714	0.866151
250	0.20667	0.110441	0.307234	0.307997	0.266196	0.856978	0.972749	0.933342	0.947075	0.777133	0.855946	0.713863	0.979333	0.879552
280	0.200897	0.107487	0.290187	0.327526	0.235462	0.961192	0.985549	0.972255	0.938442	0.778259	0.854648	0.678481	0.851784	0.877576
310	0.225629	0.157853	0.269283	0.307738	0.293029	0.958171	1.06506	0.965133	0.893274	0.875741	0.841023	0.661595	0.770006	0.87875
320	0.225525	0.154144	0.298264	0.320035	0.275968	0.891538	0.996085	0.956592	0.86616	0.806508	0.765344	0.635458	0.82333	0.842627
620	0.450082	0.278075	0.441727	0.584704	0.480633	1.02052	1.04582	0.9252	0.94429	0.832566	0.928285	0.625331	0.745807	0.883477
920	0.486465	0.233162	0.71153	0.722697	0.649342	0.868075	1.01812	0.921964	0.918019	0.833793	0.886887	0.760605	1.06668	0.909267
1220	0.526726	0.33555	1.00812	0.96488	0.652632	0.921991	1.36293	0.998573	0.90558	0.889621	0.757662	0.842716	1.03651	0.964448
1520	0.707545	0.306137	0.810291	1.03137	0.697526	0.907161	1.04713	1.02706	0.964562	0.830922	1.00234	0.832083	0.999914	0.951397
1820	0.803397	0.301985	0.845935	1.03115	0.746987	0.883318	1.17035	1.01661	0.841975	0.772186	1.04646	0.720136	1.01592	0.93337
2120	0.797181	0.327641	1.0049	0.799619	0.844488	0.783722	1.36215	1.09705	0.854247	0.665008	1.01784	0.69528	1.22319	0.962311
2420	0.735223	0.31817	1.11676	1.03038	1.01237	0.793995	1.38376	1.08522	0.852626	0.752129	0.958483	0.71994	1.11997	0.958266
2720	0.848522	0.363317	1.14902	1.14577	1.00716	0.754721	1.58504	1.08609	0.88098	0.689996	0.98228	0.738443	1.3225	1.00501
3020	0.877086	0.396046	1.23289	1.27859	1.14402	0.711498	1.4538	1.11772	0.929027	0.693849	1.15658	0.723269	1.14961	0.991919
3320	0.883786	0.417777	1.34651	1.24933	1.21782	0.926886	1.33897	1.15643	0.749651	0.731565	1.06228	0.768165	1.28952	1.00293
3620	1.07088	0.451155	1.57699	1.20844	1.27122	0.719931	1.24771	1.0786	0.806301	0.606078	1.0724	0.811867	1.19255	0.941931
3920	0.85599	0.437495	1.75106	1.24188	1.25142	0.740023	1.23824	1.00212	0.786528	0.659912	1.07745	0.902055	1.22329	0.953702
4220	0.982116	0.388519	1.70841	1.32749	1.47056	0.906737	1.37071	1.13176	0.868218	0.758151	1.1538	0.810907	1.33777	1.04226
4520	0.975514	0.415991	1.19652	1.24069	1.31476	0.826456	1.30105	1.09884	0.95404	0.734721	1.07801	0.820492	1.22489	1.00481
CORRECTED DATA
Time	b1	b2	b3	b4	b5			Filter out due to large abrupt change or wrong targeting.
120	1	1	1	1	1
130	0.112505	0.0481398	0.164737	0.0609212	0.122832
160	0.173706	0.0763263	0.257038	0.144462	0.221968
190	0.229589	0.0865769	0.318483	0.244103	0.253684
220	0.222343	0.116867	0.328241	0.167778	0.275496
250	0.234971	0.125565	0.349307	0.350175	0.30265
280	0.228923	0.122482	0.330668	0.373217	0.26831
310	0.256761	0.179634	0.306439	0.3502	0.333462
320	0.267645	0.182932	0.35397	0.379806	0.32751
620	0.509444	0.314751	0.499987	0.661822	0.544024
920	0.535008	0.256429	0.782531	0.794813	0.714138
1220	0.546142	0.347919	1.04529	1.00045	0.676689
1520	0.74369	0.321777	0.851686	1.08406	0.73316
1820	0.860749	0.323542	0.906323	1.10475	0.800312
2120	0.828402	0.340473	1.04426	0.830936	0.877563
2420	0.767242	0.332026	1.1654	1.07526	1.05646
2720	0.844295	0.361507	1.1433	1.14006	1.00215
3020	0.884231	0.399273	1.24293	1.28901	1.15334
3320	0.881201	0.416555	1.34257	1.24568	1.21426
3620	1.13689	0.478968	1.67421	1.28294	1.34959
3920	0.897544	0.458733	1.83606	1.30217	1.31218
4220	0.942297	0.372767	1.63914	1.27367	1.41094
4520	0.970841	0.413998	1.19079	1.23474	1.30846
	Normalize the bouton fluorescent right after bleaching to 0
Recovery Time_(sec)	b1	b2	b3	b4	b5
0	0	0	0	0	0
30	0.0689593	0.029612	0.110506	0.08896	0.113018
60	0.131927	0.0403811	0.184069	0.195065	0.149176
90	0.123763	0.0722032	0.195752	0.113789	0.174042
120	0.137991	0.0813405	0.220972	0.308019	0.204998
150	0.131176	0.0781022	0.198658	0.332555	0.165849
180	0.162543	0.138144	0.16965	0.308045	0.240125
190	0.174807	0.14161	0.226555	0.339572	0.233339
490	0.447258	0.280095	0.40137	0.639883	0.480173
790	0.476063	0.218823	0.739641	0.781502	0.674108
1090	0.488608	0.31494	1.05422	1.00048	0.631415
1390	0.711199	0.287476	0.822434	1.08951	0.695794
1690	0.843097	0.289331	0.887847	1.11155	0.772349
1990	0.80665	0.307118	1.05299	0.819968	0.860418
2290	0.737737	0.298244	1.19802	1.08014	1.06437
2590	0.824557	0.329215	1.17156	1.14915	1.00245
2890	0.869555	0.368891	1.29084	1.30775	1.17481
3190	0.866141	0.387048	1.41014	1.26162	1.24426
3490	1.15425	0.452617	1.80718	1.3013	1.39855
3790	0.884556	0.431359	2.00096	1.32177	1.35589
4090	0.934982	0.341045	1.7652	1.29143	1.46848
4390	0.967145	0.384361	1.22842	1.24997	1.35165

## Sheet: VG2 21Feb F2
time	b1	b2	b3	b4	b5	background	c1	c2	c3	c4	c5	c6	c7	c8
0	405373	197033	213028	315443	461635	9689	170018	203933	152854	164229	172610	159638	129190	109147
30	389818	192621	207747	322507	517454	9918	167004	214851	158069	160124	157271	153431	129416	112476
60	393829	187910	195968	321337	472904	9022	161555	199820	155061	156556	134421	149947	130364	99269
90	390428	195774	216340	314112	458887	8548	158406	184808	149690	157065	147414	124111	133317	102542
120	379866	194175	196963	309152	443352	9544	160140	192386	145007	152874	138337	132451	133081	101252
130	21704	15283	15506	22272	22178	9326	150094	178297	150673	130805	132070	132288	127036	97760
160	31918	34855	27666	34945	52799	9608	145461	177970	151472	143610	135146	132192	126740	95492
190	35634	38608	39735	43019	54250	8967	150603	178035	151018	132543	122285	135918	119670	97733
220	38652	42327	43785	46467	59082	9806	136258	172929	146554	131854	131478	124946	119302	95274
250	41266	39820	51850	57373	65436	8810	123377	160457	152569	129806	136655	124405	115611	93180
280	41890	41724	44963	50832	70094	8903	132821	164685	144254	138157	135714	129294	109677	92537
310	40515	42244	45309	52094	70578	8922	140357	153357	150028	128701	140839	127171	107710	91931
320	43367	42487	43280	57139	72723	8811	133449	145151	146495	118338	137107	121224	105075	88230
620	84311	59788	52961	65926	232751	8313	148246	175204	153236	140471	139353	128026	132301	93259
920	162704	82072	60948	84378	263332	8412	167483	179927	150669	148610	141611	136817	148350	93019
1220	156709	85520	85575	99370	287876	9906	174993	178911	158598	138121	154738	129885	151949	96881
1520	186926	91414	91339	143012	277934	8919	157546	172387	166430	128136	163448	119093	164367	97515
1820	165913	99923	106259	111925	234276	8692	147905	174973	178886	146291	164304	110034	170538	98806
2120	173372	100747	107817	134685	258122	10091	157634	197046	182202	140130	144507	116550	172959	101162
2420	175505	121298	142111	114172	246660	9367	170551	186447	188543	131609	134964	120892	163921	96564
2720	173339	117138	148036	147394	234348	10191	160646	168474	213431	125747	150823	100207	155955	99774
3020	190592	126535	131986	119532	274110	9438	152596	157766	192904	108532	146108	103959	165703	101463
3320	209173	91854	138934	118327	301570	9735	162203	161340	175586	119039	150863	107484	133864	99920
3620	181315	101825	153358	119323	274558	9063	170717	157506	161507	115841	141869	88549	150989	108816
3920	160703	103411	162168	114376	314767	8673	161497	141054	160023	105246	152371	101539	153406	108066
4220	198870	123829	214919	161831	366455	8943	161429	136101	137799	90879	147670	82552	132203	97639
4520	190730	104536	239693	150344	290561	9830	162777	145076	156522	93591	150805	89079	125396	103650
time
0	395684	187344	203339	305754	451946	160329	194244	143165	154540	162921	149949	119501	99458
30	379900	182703	197829	312589	507536	157086	204933	148151	150206	147353	143513	119498	102558
60	384807	178888	186946	312315	463882	152533	190798	146039	147534	125399	140925	121342	90247
90	381880	187226	207792	305564	450339	149858	176260	141142	148517	138866	115563	124769	93994
120	370322	184631	187419	299608	433808	150596	182842	135463	143330	128793	122907	123537	91708
130	12378	5957	6180	12946	12852	140768	168971	141347	121479	122744	122962	117710	88434
160	22310	25247	18058	25337	43191	135853	168362	141864	134002	125538	122584	117132	85884
190	26667	29641	30768	34052	45283	141636	169068	142051	123576	113318	126951	110703	88766
220	28846	32521	33979	36661	49276	126452	163123	136748	122048	121672	115140	109496	85468
250	32456	31010	43040	48563	56626	114567	151647	143759	120996	127845	115595	106801	84370
280	32987	32821	36060	41929	61191	123918	155782	135351	129254	126811	120391	100774	83634
310	31593	33322	36387	43172	61656	131435	144435	141106	119779	131917	118249	98788	83009
320	34556	33676	34469	48328	63912	124638	136340	137684	109527	128296	112413	96264	79419
620	75998	51475	44648	57613	224438	139933	166891	144923	132158	131040	119713	123988	84946
920	154292	73660	52536	75966	254920	159071	171515	142257	140198	133199	128405	139938	84607
1220	146803	75614	75669	89464	277970	165087	169005	148692	128215	144832	119979	142043	86975
1520	178007	82495	82420	134093	269015	148627	163468	157511	119217	154529	110174	155448	88596
1820	157221	91231	97567	103233	225584	139213	166281	170194	137599	155612	101342	161846	90114
2120	163281	90656	97726	124594	248031	147543	186955	172111	130039	134416	106459	162868	91071
2420	166138	111931	132744	104805	237293	161184	177080	179176	122242	125597	111525	154554	87197
2720	163148	106947	137845	137203	224157	150455	158283	203240	115556	140632	90016	145764	89583
3020	181154	117097	122548	110094	264672	143158	148328	183466	99094	136670	94521	156265	92025
3320	199438	82119	129199	108592	291835	152468	151605	165851	109304	141128	97749	124129	90185
3620	172252	92762	144295	110260	265495	161654	148443	152444	106778	132806	79486	141926	99753
3920	152030	94738	153495	105703	306094	152824	132381	151350	96573	143698	92866	144733	99393
4220	189927	114886	205976	152888	357512	152486	127158	128856	81936	138727	73609	123260	88696
4520	180900	94706	229863	140514	280731	152947	135246	146692	83761	140975	79249	115566	93820
	AVERAGE OF PREBLEACH
	382519	184158	196665	307166	461502	154080	189815	142792	148825	140666	134571	121729	95593
NORMALIZED DATA
time	b1	b2	b3	b4	b5	c1	c2	c3	c4	c5	c6	c7	c8	Average of controls
120	1	1	1	1	1	1	1	1	1	1	1	1	1	1
130	0.0323592	0.0323472	0.031424	0.0421466	0.0278482	0.913601	0.890186	0.98988	0.816252	0.872589	0.913731	0.966981	0.92511	0.911041
160	0.058324	0.137094	0.0918211	0.0824863	0.0935879	0.881702	0.886978	0.993501	0.900397	0.892452	0.910922	0.962233	0.898434	0.915827
190	0.0697143	0.160954	0.156449	0.110859	0.0981209	0.919234	0.890697	0.994811	0.830342	0.80558	0.943373	0.909419	0.928583	0.902755
220	0.0754107	0.176593	0.172776	0.119352	0.106773	0.820688	0.859377	0.957673	0.820075	0.864968	0.855605	0.899503	0.894082	0.871497
250	0.0848482	0.168388	0.218849	0.1581	0.122699	0.743553	0.798918	1.00677	0.813006	0.908852	0.858986	0.877364	0.882596	0.861256
280	0.0862363	0.178222	0.183357	0.136503	0.132591	0.804242	0.820703	0.947889	0.868494	0.901502	0.894625	0.827853	0.874897	0.867526
310	0.0825921	0.180942	0.18502	0.140549	0.133598	0.853029	0.760924	0.988193	0.804829	0.9378	0.878708	0.811538	0.868359	0.862922
320	0.0903381	0.182864	0.175268	0.157335	0.138487	0.808915	0.718277	0.964228	0.735943	0.912059	0.835341	0.790803	0.830804	0.824546
620	0.198678	0.279515	0.227026	0.187563	0.486321	0.908182	0.879228	1.01492	0.888007	0.931566	0.889587	1.01855	0.888622	0.927334
920	0.403358	0.399982	0.267134	0.247313	0.55237	1.03239	0.903588	0.996253	0.94203	0.946914	0.954177	1.14958	0.885075	0.976251
1220	0.38378	0.410592	0.384761	0.291256	0.602316	1.07143	0.890365	1.04132	0.861513	1.02961	0.891564	1.16688	0.909847	0.982816
1520	0.465355	0.447957	0.419088	0.436549	0.582912	0.964607	0.861195	1.10308	0.801053	1.09855	0.818703	1.277	0.926804	0.981373
1820	0.411015	0.495394	0.496108	0.336082	0.488804	0.903509	0.876014	1.1919	0.924567	1.10625	0.753072	1.32956	0.942684	1.00344
2120	0.426858	0.492272	0.496916	0.405624	0.537443	0.957572	0.984931	1.20533	0.873769	0.955566	0.791097	1.33795	0.952695	1.00736
2420	0.434327	0.607797	0.674975	0.3412	0.514175	1.0461	0.932906	1.2548	0.821379	0.892871	0.828742	1.26965	0.912169	0.994828
2720	0.42651	0.580734	0.700913	0.446674	0.485712	0.976471	0.833879	1.42333	0.776453	0.999755	0.668909	1.19744	0.937129	0.976671
3020	0.473582	0.635849	0.623131	0.358419	0.573501	0.929112	0.781433	1.28485	0.665841	0.97159	0.702385	1.28371	0.962675	0.947699
3320	0.521381	0.445915	0.65695	0.353529	0.632359	0.989535	0.798697	1.16149	0.734445	1.00328	0.726373	1.01971	0.943427	0.92212
3620	0.45031	0.503708	0.73371	0.358959	0.575284	1.04915	0.782039	1.06759	0.717472	0.94412	0.59066	1.16591	1.04352	0.920059
3920	0.397445	0.514438	0.78049	0.344123	0.663256	0.991846	0.69742	1.05993	0.648901	1.02155	0.690087	1.18897	1.03975	0.917308
4220	0.496517	0.623843	1.04734	0.497737	0.77467	0.989652	0.669903	0.902403	0.550551	0.986213	0.546988	1.01257	0.92785	0.823267
4520	0.472918	0.514264	1.1688	0.457453	0.608298	0.992644	0.712513	1.02731	0.562814	1.00219	0.588899	0.949368	0.981453	0.85215
CORRECTED DATA
Time	b1	b2	b3	b4	b5			Filter out due to large abrupt change or wrong targeting.
120	1	1	1	1	1
130	0.0355189	0.0355057	0.0344924	0.046262	0.0305674
160	0.0636845	0.149694	0.10026	0.0900676	0.102189
190	0.0772239	0.178292	0.173302	0.1228	0.108691
220	0.0865301	0.202631	0.198252	0.136951	0.122517
250	0.0985168	0.195514	0.254105	0.183569	0.142466
280	0.0994049	0.205437	0.211357	0.157347	0.152838
310	0.095712	0.209685	0.214411	0.162876	0.154821
320	0.109561	0.221776	0.212563	0.190814	0.167955
620	0.214246	0.301418	0.244815	0.202261	0.524429
920	0.41317	0.409712	0.273633	0.253329	0.565807
1220	0.39049	0.417771	0.391488	0.296349	0.612847
1520	0.474188	0.456459	0.427043	0.444835	0.593975
1820	0.409605	0.493694	0.494405	0.334929	0.487126
2120	0.423738	0.488674	0.493284	0.402659	0.533514
2420	0.436584	0.610957	0.678484	0.342974	0.516848
2720	0.436698	0.594605	0.717655	0.457343	0.497313
3020	0.499718	0.67094	0.65752	0.378199	0.605151
3320	0.565416	0.483576	0.712434	0.383387	0.685767
3620	0.489436	0.547473	0.797459	0.390148	0.625269
3920	0.433273	0.560812	0.850848	0.375145	0.723046
4220	0.603106	0.757766	1.27218	0.604588	0.940971
4520	0.554971	0.60349	1.3716	0.536822	0.71384
	Normalize the bouton fluorescent right after bleaching to 0
Recovery Time_(sec)	b1	b2	b3	b4	b5
0	0	0	0	0	0
30	0.0292028	0.118392	0.0681174	0.0459304	0.0738803
60	0.0432409	0.148043	0.143768	0.0802509	0.0805864
90	0.0528898	0.173278	0.16961	0.095088	0.0948487
120	0.0653178	0.165899	0.227458	0.143968	0.115426
150	0.0662387	0.176187	0.183183	0.116474	0.126126
180	0.0624098	0.180592	0.186346	0.122271	0.128171
190	0.0767688	0.193127	0.184432	0.151564	0.14172
490	0.185309	0.275701	0.217837	0.163565	0.509434
790	0.391559	0.387982	0.247684	0.217111	0.552117
1090	0.368044	0.396338	0.369749	0.262217	0.600639
1390	0.454824	0.43645	0.406574	0.417906	0.581173
1690	0.387862	0.475055	0.476343	0.302669	0.470955
1990	0.402516	0.46985	0.475182	0.373685	0.518805
2290	0.415836	0.596635	0.666998	0.311104	0.501614
2590	0.415953	0.579682	0.707568	0.431021	0.481463
2890	0.481294	0.658827	0.645285	0.348038	0.592701
3190	0.549412	0.464565	0.702161	0.353478	0.675858
3490	0.470634	0.530815	0.790224	0.360566	0.613453
3790	0.412402	0.544645	0.84552	0.344836	0.714313
4090	0.588489	0.748848	1.2819	0.585408	0.93911
4390	0.538582	0.588893	1.38487	0.514355	0.704817

## Sheet: VG2 17Apr F2
time	b1	b2	b3	b4	b5	background	c1	c2	c3	c4	c5	c6	c7	c8
1	243440	482452	269301	312279	548787	11723	553263	391868	150258	239717	247927	216633	322176	416716
2	239722	482911	274074	293568	516170	12009	521245	366717	147719	236109	242845	210592	326027	404026
3	227316	463382	198400	290645	508538	11408	508030	375630	142526	234434	240424	218006	314858	385484
4	235724	446161	292868	296975	558650	11989	482098	370406	150081	225196	247026	222898	328804	398415
5	224081	431009	277423	306891	545681	10265	495591	361618	138708	229362	253264	211031	333117	383801
6	32298	33275	29914	31270	37872	12739	490041	349175	137125	231509	241492	202703	325030	386342
7	39212	53042	36016	39018	59060	11465	493136	352803	134640	230254	242994	210058	312052	382308
8	43477	60697	40287	47557	100104	11245	495454	354067	122710	216936	226752	200275	305671	360046
9	44972	63988	40625	51981	106095	11138	492471	346911	142367	233297	225624	216696	302973	369992
10	48836	68284	42259	52655	115489	11770	504812	333582	132709	213790	214345	231823	297436	362460
11	47507	70657	43509	59665	217811	11896	493331	330763	132125	211503	221016	206467	298069	364351
12	49989	71507	44789	57846	230289	12228	497695	360825	126102	218504	222663	202629	315506	347185
13	50626	71224	43957	61352	244176	11710	491410	327408	118754	223429	216376	203549	304409	350634
14	90805	102866	49237	89449	284832	11106	519035	352919	136084	252239	241321	215111	312460	383034
15	112091	119076	66326	94702	371721	11924	525059	347464	140776	231939	247505	222984	313439	375199
16	141438	139269	77945	95340	319213	11398	502625	342273	125257	214484	228512	209957	300496	381562
17	175017	151697	77538	105150	384800	11573	543718	331234	131441	203885	241309	234860	314288	387373
18	175018	158869	88163	109553	324318	12197	491747	314179	135787	229042	236927	213548	341301	384179
19	215388	180887	88329	119706	354685	11109	476937	308736	144495	216953	232103	192429	360819	378388
20	253500	182651	94049	123482	379880	10697	492974	313388	136166	223377	220092	192676	347428	395822
21	282306	170352	82937	109767	422281	10416	468713	307557	122441	225616	230421	179136	305262	355482
22	283725	173973	77732	126437	508607	13126	513756	314540	125038	186823	213611	167273	297168	359282
23	315671	162943	82075	135724	381342	11279	494942	325486	117194	192906	231447	174761	290327	326936
24	300495	162174	75073	155722	510877	10828	512813	340885	114362	204383	225483	174879	281068	346087
25	316094	179320	78916	147116	467382	13999	503878	343466	113213	200074	226381	178384	265573	352781
26	310219	176477	85175	150759	477469	11388	492389	352872	109509	193597	231227	190312	275919	360168
27	351102	199488	90607	156608	495065	10603	544445	366528	122688	191554	242800	186672	280385	365251
time
0	231717	470729	257578	300556	537064	541540	380145	138535	227994	236204	204910	310453	404993
30	227713	470902	262065	281559	504161	509236	354708	135710	224100	230836	198583	314018	392017
60	215908	451974	186992	279237	497130	496622	364222	131118	223026	229016	206598	303450	374076
90	223735	434172	280879	284986	546661	470109	358417	138092	213207	235037	210909	316815	386426
120	213816	420744	267158	296626	535416	485326	351353	128443	219097	242999	200766	322852	373536
130	19559	20536	17175	18531	25133	477302	336436	124386	218770	228753	189964	312291	373603
160	27747	41577	24551	27553	47595	481671	341338	123175	218789	231529	198593	300587	370843
190	32232	49452	29042	36312	88859	484209	342822	111465	205691	215507	189030	294426	348801
220	33834	52850	29487	40843	94957	481333	335773	131229	222159	214486	205558	291835	358854
250	37066	56514	30489	40885	103719	493042	321812	120939	202020	202575	220053	285666	350690
280	35611	58761	31613	47769	205915	481435	318867	120229	199607	209120	194571	286173	352455
310	37761	59279	32561	45618	218061	485467	348597	113874	206276	210435	190401	303278	334957
320	38916	59514	32247	49642	232466	479700	315698	107044	211719	204666	191839	292699	338924
620	79699	91760	38131	78343	273726	507929	341813	124978	241133	230215	204005	301354	371928
920	100167	107152	54402	82778	359797	513135	335540	128852	220015	235581	211060	301515	363275
1220	130040	127871	66547	83942	307815	491227	330875	113859	203086	217114	198559	289098	370164
1520	163444	140124	65965	93577	373227	532145	319661	119868	192312	229736	223287	302715	375800
1820	162821	146672	75966	97356	312121	479550	301982	123590	216845	224730	201351	329104	371982
2120	204279	169778	77220	108597	343576	465828	297627	133386	205844	220994	181320	349710	367279
2420	242803	171954	83352	112785	369183	482277	302691	125469	212680	209395	181979	336731	385125
2720	271890	159936	72521	99351	411865	458297	297141	112025	215200	220005	168720	294846	345066
3020	270599	160847	64606	113311	495481	500630	301414	111912	173697	200485	154147	284042	346156
3320	304392	151664	70796	124445	370063	483663	314207	105915	181627	220168	163482	279048	315657
3620	289667	151346	64245	144894	500049	501985	330057	103534	193555	214655	164051	270240	335259
3920	302095	165321	64917	133117	453383	489879	329467	99214	186075	212382	164385	251574	338782
4220	298831	165089	73787	139371	466081	481001	341484	98121	182209	219839	178924	264531	348780
4520	340499	188885	80004	146005	484462	533842	355925	112085	180951	232197	176069	269782	354648
	AVERAGE OF PREBLEACH
	222578	449704	250934	288593	524086	500567	361769	134380	221485	234818	204353	313518	386210
NORMALIZED DATA
time	b1	b2	b3	b4	b5	c1	c2	c3	c4	c5	c6	c7	c8	Average of controls
120	1	1	1	1	1	1	1	1	1	1	1	1	1	1
130	0.0878749	0.0456656	0.0684442	0.0642116	0.0479558	0.953523	0.929975	0.925632	0.987743	0.97417	0.929587	0.996088	0.967358	0.958009
160	0.124662	0.0924541	0.0978383	0.0954736	0.0908152	0.962252	0.943525	0.91662	0.987829	0.985992	0.971813	0.958756	0.960212	0.960875
190	0.144812	0.109966	0.115735	0.125824	0.16955	0.967322	0.947627	0.829479	0.928691	0.91776	0.925016	0.939105	0.903139	0.919767
220	0.15201	0.117522	0.117509	0.141525	0.181186	0.961576	0.928142	0.976554	1.00304	0.913412	1.0059	0.930841	0.929169	0.956079
250	0.166531	0.125669	0.121502	0.14167	0.197904	0.984968	0.889551	0.89998	0.912117	0.862688	1.07683	0.911164	0.90803	0.930666
280	0.159993	0.130666	0.125981	0.165524	0.392903	0.96178	0.881411	0.894697	0.901222	0.890561	0.952131	0.912781	0.9126	0.913398
310	0.169653	0.131818	0.129759	0.15807	0.416078	0.969835	0.96359	0.847405	0.931333	0.896161	0.931725	0.96734	0.867293	0.921835
320	0.174842	0.13234	0.128508	0.172014	0.443564	0.958314	0.872651	0.796579	0.955908	0.871593	0.938762	0.933597	0.877565	0.900621
620	0.358073	0.204045	0.151956	0.271466	0.522292	1.01471	0.944838	0.930037	1.08871	0.980396	0.998296	0.961203	0.963021	0.985151
920	0.450031	0.238272	0.216798	0.286833	0.686522	1.02511	0.927498	0.958866	0.993364	1.00325	1.03282	0.961716	0.940616	0.980404
1220	0.584245	0.284345	0.265197	0.290867	0.587336	0.981342	0.914603	0.847294	0.91693	0.924604	0.971646	0.922111	0.958454	0.929623
1520	0.734323	0.311591	0.262877	0.324253	0.712148	1.06309	0.883605	0.89201	0.868285	0.978356	1.09265	0.965544	0.973047	0.964573
1820	0.731524	0.326152	0.302733	0.337347	0.595553	0.958014	0.834737	0.919708	0.979051	0.957037	0.985309	1.04971	0.963161	0.955842
2120	0.917787	0.377533	0.30773	0.376298	0.655571	0.930601	0.822699	0.992606	0.929382	0.941127	0.887287	1.11544	0.950984	0.946266
2420	1.09087	0.382371	0.332166	0.39081	0.704432	0.963462	0.836697	0.933691	0.960246	0.891732	0.890512	1.07404	0.997192	0.943447
2720	1.22155	0.355647	0.289004	0.34426	0.785872	0.915556	0.821356	0.833646	0.971624	0.936916	0.825629	0.940445	0.893468	0.89233
3020	1.21575	0.357673	0.257462	0.392633	0.945419	1.00013	0.833167	0.832805	0.784239	0.853787	0.754317	0.905984	0.896291	0.85759
3320	1.36758	0.337253	0.28213	0.431213	0.706111	0.966231	0.868529	0.788178	0.820043	0.93761	0.799997	0.890055	0.81732	0.860995
3620	1.30142	0.336546	0.256023	0.502071	0.954135	1.00283	0.912342	0.770459	0.873897	0.914132	0.802782	0.861961	0.868075	0.87581
3920	1.35726	0.367622	0.258701	0.461262	0.865092	0.978649	0.910711	0.738311	0.840125	0.904452	0.804416	0.802424	0.877197	0.857036
4220	1.34259	0.367106	0.294049	0.482933	0.889321	0.960913	0.943928	0.730178	0.82267	0.936209	0.875563	0.843752	0.903085	0.877037
4520	1.5298	0.420021	0.318824	0.50592	0.924393	1.06648	0.983846	0.834092	0.816991	0.988836	0.861592	0.8605	0.918279	0.916326
CORRECTED DATA
Time	b1	b2	b3	b4	b5			Filter out due to large abrupt change or wrong targeting.
120	1	1	1	1	1
130	0.0917266	0.0476671	0.0714442	0.0670261	0.0500578
160	0.129738	0.0962187	0.101822	0.0993612	0.094513
190	0.157444	0.119558	0.125831	0.1368	0.18434
220	0.158993	0.12292	0.122907	0.148026	0.189509
250	0.178937	0.135032	0.130554	0.152225	0.212648
280	0.175163	0.143055	0.137926	0.181218	0.430155
310	0.184038	0.142995	0.140762	0.171474	0.451359
320	0.194135	0.146943	0.142688	0.190995	0.492509
620	0.36347	0.207121	0.154246	0.275557	0.530164
920	0.459026	0.243035	0.221131	0.292566	0.700244
1220	0.628475	0.305871	0.285274	0.312887	0.631801
1520	0.761293	0.323036	0.272532	0.336162	0.738304
1820	0.765319	0.34122	0.316718	0.352932	0.623066
2120	0.969904	0.398971	0.325204	0.397667	0.692798
2420	1.15626	0.405292	0.352078	0.414237	0.746658
2720	1.36894	0.39856	0.323875	0.385799	0.880697
3020	1.41764	0.417068	0.300216	0.457833	1.10241
3320	1.58837	0.391701	0.327678	0.500831	0.82011
3620	1.48596	0.384268	0.292327	0.573264	1.08943
3920	1.58366	0.428946	0.301856	0.538207	1.0094
4220	1.53083	0.418575	0.335275	0.550641	1.01401
4520	1.66949	0.458374	0.347938	0.552118	1.0088
	Normalize the bouton fluorescent right after bleaching to 0
Recovery Time_(sec)	b1	b2	b3	b4	b5
0	0	0	0	0	0
30	0.0418503	0.0509817	0.0327153	0.0346581	0.0467978
60	0.0723548	0.0754893	0.0585716	0.0747868	0.141359
90	0.0740595	0.07902	0.0554224	0.0868192	0.1468
120	0.0960179	0.0917373	0.0636575	0.0913193	0.171158
150	0.0918627	0.100162	0.0715968	0.122395	0.400127
180	0.101634	0.100099	0.0746508	0.111951	0.422448
190	0.112751	0.104245	0.0767253	0.132875	0.465767
490	0.299186	0.167435	0.0891731	0.223512	0.505406
790	0.404393	0.205146	0.161204	0.241743	0.684448
1090	0.590955	0.271128	0.230282	0.263524	0.612398
1390	0.737186	0.289151	0.21656	0.288471	0.724513
1690	0.741619	0.308246	0.264146	0.306446	0.603203
1990	0.966865	0.368888	0.273285	0.354394	0.67661
2290	1.17204	0.375525	0.302226	0.372155	0.733307
2590	1.4062	0.368456	0.271854	0.341674	0.87441
2890	1.45981	0.38789	0.246373	0.418883	1.10781
3190	1.64778	0.361254	0.275949	0.46497	0.81063
3490	1.53504	0.353449	0.237878	0.542607	1.09414
3790	1.64261	0.400363	0.24814	0.505031	1.0099
4090	1.58443	0.389473	0.284131	0.518359	1.01474
4390	1.7371	0.431264	0.297767	0.519942	1.00927

[truncated: 4 more sheets: VG2 17Apr F4, VG2 18Apr F3, VG2 25May F2, VG2 26May F2]
