# Supplementary material for: A proline-rich motif on VGLUT1 reduces synaptic vesicle super-pool and spontaneous release frequency
Source: eLife journal article supplement (doi:10.7554/elife.50401), 2019-10-30
Supplement: supp [file elife-50401-supp-v1.zip › elife_poa_e50401_Figure_1_source_data_1.xlsx]

## Sheet: WT 20oct
time	b1	b2	b3	b4	b5	background	c1	c2	c3	c4	c5	c6	c7	c8
0	85020	174124	105925	60167.3	119338	1067.49	115486	54521.7	143742	98758.1	86495.3	74246.3	77582.7	39592.8
30	84873.8	182354	106710	62477.2	101629	1135.88	118705	56318.8	145291	92172	84298.1	72002.6	75644.2	38750.6
60	86007.7	180146	110028	61998.5	104128	1088.4	113198	54214	149363	92312.5	83543.9	75026	67765.5	42755.6
90	83288.3	176894	109679	60306.2	113382	1091.61	111859	59199.5	152055	94840.6	86976.7	76894.6	66088.4	42903.3
120	86482.4	178327	105416	62326.7	114595	1036.59	117307	58494.5	150583	97796.8	89824.4	76181.5	63536.6	41606.8
130	12834.9	19381	22295.4	8967.35	18836.3	1075.2	113097	57226.2	150241	96558.3	89524.6	75186.2	60492.4	40249.3
160	17214.2	26493.6	31547.5	12034.5	25210.5	1063.74	113209	56862.8	150253	98526.1	84808.8	76819.3	59638.4	43222.3
190	18730.2	27841.8	37049.7	12806	28925	1047.15	109739	57015.6	148980	89123.4	86724.2	71064.8	61416	45285.6
220	19464.9	29940	37516.5	12290	30755	1027.41	115839	56106.9	143117	94058.4	87179.1	73560.8	59606.8	43280.7
250	23253.6	34789.9	39041.8	12248.3	31220.7	1025.19	116175	53755.6	147879	89878.6	85451.7	69609.8	57442.5	44725.7
280	21145.1	35423.2	39795	14141.2	33447	1004.52	115127	55728.2	146941	90647.8	83416.6	71709.6	59810.4	44718.6
310	22805.6	34500.5	41653.7	14494.8	35933.9	1101.45	115382	57371.8	142756	93234.1	76844.2	70309.2	60130.5	46827.2
320	22873.9	34570.9	41021.2	13754.3	34746.6	1054.53	112288	52373.3	138840	91801.7	79321	68806	60351.2	46719.6
620	29982.4	53315.2	44863.6	17942.7	61020.7	1111.41	118444	57719.9	148144	94008.8	78465.4	70110.3	64523.8	44264.9
920	34291	68341.3	45825.6	18285.1	73027.1	1028.56	105168	55627.8	148164	94505.3	77636.6	73577.8	82994.3	41330.4
1220	36571	58739.2	43881.6	22318.4	83898.9	1046.49	115836	54157.6	155654	93201.6	81635.5	73410.9	63935.7	43939.6
1520	40857.5	60068.9	41529.3	28265.3	100463	942.269	122485	57979.6	139158	83258.3	77279.4	70616.6	78330.8	45105.3
1820	42142.5	86029.9	47963.5	27202.1	89233	1033.97	101100	60995.4	134640	83531.9	75845.2	62503.1	70623.3	42706.4
2120	43829	95221.5	51576.8	24051.8	125765	1045.87	101401	55328.2	141034	86328.2	77189.8	73198.8	70946.9	41668.8
2420	41792.4	83811	47220.6	27271.5	106522	1064.52	103318	63680.6	137442	86344.1	82487	71896.8	87425.9	43467.7
2720	40884.4	94038.2	46116.8	27585.3	102035	1002.83	100480	64963.8	121627	94160.7	71717.3	74927.4	78334.8	41146.7
3020	41120.4	94772.8	48860	29626	66016.1	1003.3	114164	61868.5	128231	94743.5	81694	69459	74800.2	36197.3
3320	41890.8	95366.6	46455.2	29646.4	84596.1	1080.97	105137	59663	132094	70533.9	76160.6	74309.8	67875.1	35638.6
3620	47767.8	92680.6	49139.8	30276.6	91413.6	916.696	105292	59309.4	116944	88466	77024	70966.3	93152.8	35316.4
3920	45503.7	94527.4	58491.1	32775	52750.5	837.105	104510	56728.3	129481	77549.1	75052	72640.7	76778.4	33313.1
4220	51102	99295.4	57679.9	36325.8	55568.5	886.148	103815	60340	123682	81355.3	75446.1	68345.1	73667.3	32886.2
4520	46789.2	99066.8	54579.3	36324.8	58279.8	778.376	110399	61233.2	124083	85829.8	80120.5	67833.8	90917.9	31190.2
time
0	83952.5	173056	104857	59099.8	118270	114418	53454.2	142675	97690.6	85427.8	73178.8	76515.2	38525.3
30	83737.9	181218	105574	61341.3	100493	117569	55182.9	144155	91036.2	83162.2	70866.7	74508.4	37614.7
60	84919.3	179058	108940	60910.1	103040	112110	53125.6	148275	91224.1	82455.5	73937.6	66677.1	41667.2
90	82196.6	175802	108587	59214.6	112290	110768	58107.8	150963	93749	85885.1	75803	64996.8	41811.6
120	85445.8	177290	104379	61290.1	113558	116270	57457.9	149546	96760.2	88787.8	75144.9	62500	40570.2
130	11759.7	18305.8	21220.2	7892.15	17761.1	112022	56151	149166	95483.1	88449.4	74111	59417.2	39174.1
160	16150.4	25429.9	30483.7	10970.8	24146.8	112145	55799	149189	97462.4	83745.1	75755.6	58574.6	42158.6
190	17683	26794.6	36002.6	11758.9	27877.8	108691	55968.4	147932	88076.2	85677	70017.6	60368.8	44238.5
220	18437.5	28912.5	36489.1	11262.6	29727.6	114811	55079.5	142089	93031	86151.7	72533.4	58579.4	42253.2
250	22228.4	33764.7	38016.6	11223.1	30195.5	115150	52730.4	146854	88853.4	84426.5	68584.6	56417.3	43700.5
280	20140.6	34418.7	38790.4	13136.7	32442.4	114122	54723.7	145937	89643.2	82412.1	70705	58805.9	43714.1
310	21704.2	33399	40552.3	13393.4	34832.5	114280	56270.4	141654	92132.7	75742.8	69207.8	59029	45725.8
320	21819.4	33516.4	39966.7	12699.8	33692	111233	51318.7	137785	90747.1	78266.5	67751.5	59296.7	45665
620	28871	52203.8	43752.1	16831.3	59909.3	117333	56608.5	147032	92897.4	77353.9	68998.9	63412.4	43153.5
920	33262.4	67312.7	44797	17256.5	71998.6	104139	54599.2	147135	93476.8	76608.1	72549.2	81965.8	40301.9
1220	35524.5	57692.7	42835.1	21271.9	82852.4	114789	53111.2	154608	92155.1	80589	72364.4	62889.3	42893.1
1520	39915.3	59126.6	40587	27323	99520.8	121543	57037.3	138216	82316	76337.2	69674.3	77388.6	44163
1820	41108.5	84995.9	46929.5	26168.1	88199	100066	59961.5	133606	82498	74811.3	61469.1	69589.4	41672.4
2120	42783.1	94175.6	50531	23005.9	124719	100355	54282.3	139988	85282.3	76143.9	72152.9	69901	40622.9
2420	40727.9	82746.4	46156	26207	105457	102253	62616	136378	85279.6	81422.5	70832.2	86361.4	42403.2
2720	39881.6	93035.4	45114	26582.5	101032	99477.5	63961	120624	93157.9	70714.5	73924.6	77332	40143.9
3020	40117.1	93769.5	47856.7	28622.7	65012.8	113161	60865.2	127228	93740.2	80690.7	68455.7	73796.9	35194
3320	40809.8	94285.6	45374.2	28565.5	83515.2	104056	58582	131013	69453	75079.6	73228.9	66794.2	34557.6
3620	46851.1	91763.9	48223.1	29359.9	90496.9	104375	58392.7	116027	87549.4	76107.3	70049.6	92236.1	34399.7
3920	44666.6	93690.3	57654	31937.8	51913.4	103673	55891.2	128644	76712	74214.9	71803.6	75941.3	32476
4220	50215.9	98409.2	56793.7	35439.7	54682.4	102929	59453.8	122796	80469.2	74560	67459	72781.2	32000
4520	46010.8	98288.5	53801	35546.5	57501.4	109621	60454.8	123304	85051.4	79342.1	67055.4	90139.5	30411.8
	AVERAGE OF PREBLEACH
	84050.4	177285	106468	60371.2	109530	114227	55465.7	147123	94092	85143.7	73786.2	69039.5	40037.8
NORMALIZED DATA
time	b1	b2	b3	b4	b5	c1	c2	c3	c4	c5	c6	c7	c8	Average of controls
120	1	1	1	1	1	1	1	1	1	1	1	1	1	1
130	0.139912	0.103257	0.199312	0.130727	0.162157	0.980693	1.01236	1.01388	1.01478	1.03883	1.0044	0.860625	0.978428	0.988
160	0.192152	0.143441	0.28632	0.181723	0.220457	0.981775	1.00601	1.01405	1.03582	0.983574	1.02669	0.848422	1.05297	0.993663
190	0.210386	0.151139	0.338156	0.194776	0.254522	0.951537	1.00906	1.0055	0.936065	1.00626	0.948926	0.87441	1.10492	0.979586
220	0.219362	0.163085	0.342726	0.186556	0.27141	1.00512	0.993038	0.965788	0.988723	1.01184	0.983021	0.848491	1.05533	0.981419
250	0.264465	0.190454	0.357072	0.185901	0.275681	1.00808	0.950685	0.998173	0.944324	0.991577	0.929504	0.817174	1.09148	0.966374
280	0.239625	0.194143	0.364341	0.217599	0.296196	0.999083	0.986622	0.991937	0.952719	0.967918	0.958242	0.851771	1.09182	0.975014
310	0.258228	0.188392	0.380889	0.22185	0.318017	1.00047	1.01451	0.96283	0.979177	0.889588	0.93795	0.855004	1.14206	0.972698
320	0.259599	0.189054	0.375389	0.210361	0.307605	0.973791	0.925234	0.936534	0.964451	0.919228	0.918214	0.85888	1.14055	0.95461
620	0.343497	0.294463	0.410944	0.278797	0.546965	1.02719	1.0206	0.999385	0.987304	0.908511	0.935119	0.918494	1.07782	0.984303
920	0.395744	0.379687	0.420758	0.285841	0.657339	0.911686	0.984378	1.00008	0.993461	0.899751	0.983235	1.18723	1.0066	0.995802
1220	0.422657	0.325424	0.402331	0.352352	0.756434	1.00492	0.95755	1.05088	0.979414	0.946506	0.980731	0.910917	1.07132	0.987779
1520	0.474896	0.333512	0.381215	0.452583	0.908614	1.06404	1.02833	0.93946	0.874846	0.896569	0.944273	1.12093	1.10303	0.996436
1820	0.489093	0.479431	0.440787	0.433454	0.805247	0.876024	1.08105	0.908127	0.87678	0.878647	0.83307	1.00796	1.04083	0.937812
2120	0.509017	0.531211	0.474614	0.381075	1.13867	0.878555	0.978664	0.951505	0.906371	0.894299	0.977864	1.01248	1.01461	0.951794
2420	0.484565	0.466743	0.433522	0.434098	0.962814	0.895175	1.12891	0.926966	0.906343	0.956296	0.959966	1.2509	1.05908	1.01045
2720	0.474496	0.524779	0.423734	0.440317	0.922412	0.870874	1.15316	0.819886	0.990072	0.830531	1.00188	1.12011	1.00265	0.973645
3020	0.477297	0.52892	0.449496	0.474111	0.59356	0.990663	1.09735	0.864772	0.996261	0.9477	0.927758	1.06891	0.879018	0.971554
3320	0.48554	0.531831	0.426179	0.473164	0.762484	0.910958	1.05618	0.8905	0.738139	0.881799	0.992446	0.967477	0.863124	0.912579
3620	0.557416	0.517607	0.452937	0.486323	0.826227	0.913749	1.05277	0.788643	0.930465	0.893869	0.949359	1.33599	0.85918	0.965503
3920	0.531426	0.528473	0.541518	0.529025	0.473964	0.907604	1.00767	0.874398	0.815287	0.871644	0.97313	1.09997	0.811133	0.920104
4220	0.597449	0.555091	0.533437	0.58703	0.499244	0.901086	1.0719	0.83465	0.855218	0.875696	0.914249	1.0542	0.799245	0.91328
4520	0.547419	0.55441	0.505328	0.588799	0.524982	0.959672	1.08995	0.838105	0.903918	0.931861	0.90878	1.30562	0.759577	0.962186
CORRECTED DATA
Time	b1	b2	b3	b4	b5			Filter out due to large abrupt change or wrong targeting.
120	1	1	1	1	1
130	0.141611	0.104511	0.201733	0.132315	0.164126
160	0.193377	0.144355	0.288146	0.182882	0.221863
190	0.21477	0.154289	0.345203	0.198835	0.259826
220	0.223515	0.166173	0.349214	0.190088	0.276549
250	0.273667	0.197081	0.369497	0.19237	0.285274
280	0.245766	0.199118	0.373677	0.223175	0.303786
310	0.265476	0.19368	0.391579	0.228077	0.326943
320	0.271942	0.198043	0.393238	0.220364	0.322231
620	0.348974	0.299159	0.417497	0.283243	0.555688
920	0.397412	0.381287	0.422531	0.287046	0.66011
1220	0.427886	0.32945	0.407308	0.356712	0.765793
1520	0.476595	0.334705	0.382579	0.454202	0.911863
1820	0.521526	0.511223	0.470017	0.462198	0.858645
2120	0.534797	0.558115	0.498652	0.400375	1.19634
2420	0.479551	0.461914	0.429037	0.429607	0.952852
2720	0.48734	0.538984	0.435204	0.452236	0.947379
3020	0.491272	0.544407	0.462657	0.487993	0.610939
3320	0.532053	0.582778	0.467005	0.518491	0.835527
3620	0.577332	0.536101	0.46912	0.503698	0.855747
3920	0.577572	0.574362	0.588539	0.574962	0.515119
4220	0.654179	0.607799	0.584089	0.64277	0.54665
4520	0.568933	0.576198	0.525187	0.611939	0.545614
	Normalize the bouton fluorescent right after bleaching to 0
Recovery Time_(sec)	b1	b2	b3	b4	b5
0	0	0	0	0	0
30	0.0603055	0.0444948	0.10825	0.0582776	0.0690737
60	0.0852283	0.0555874	0.179727	0.0766642	0.11449
90	0.0954157	0.0688587	0.184752	0.0665826	0.134497
120	0.153842	0.103374	0.21016	0.0692127	0.144935
150	0.121337	0.105649	0.215397	0.104715	0.167083
180	0.144299	0.0995756	0.237823	0.110365	0.194786
190	0.151832	0.104448	0.239901	0.101476	0.189149
480	0.241572	0.217365	0.270291	0.173943	0.468446
780	0.298001	0.309079	0.276597	0.178326	0.593372
1080	0.333503	0.251192	0.257527	0.258616	0.719805
1380	0.390247	0.257059	0.226548	0.370972	0.894557
1680	0.44259	0.454179	0.336083	0.380187	0.83089
1980	0.458051	0.506544	0.371955	0.308938	1.23489
2280	0.393691	0.399115	0.284747	0.342626	0.943594
2580	0.402764	0.485179	0.292473	0.368706	0.937047
2880	0.407346	0.491235	0.326863	0.409916	0.534545
3180	0.454854	0.534085	0.332311	0.445065	0.803233
3480	0.507603	0.48196	0.334959	0.428017	0.827422
3780	0.507882	0.524687	0.484558	0.510147	0.419912
4080	0.597128	0.562026	0.478983	0.588296	0.457633
4380	0.497818	0.526737	0.405196	0.552762	0.456394

## Sheet: WT 21oct F1
time	b1	b2	b3	b4	b5	background	c1	c2	c3	c4	c5	c6	c7	c8
0	9320.63	8334.87	8841.49	6139.74	8410.78	64.378	6904.49	3586.64	8063.51	5534.83	12516.9	7674.61	6364.47	9838.27
30	9751.52	8233.42	9100.61	6078.49	7895.81	59.843	6933.48	3550.16	8388.44	5387.03	12498.3	7606.82	6501.71	9483.67
60	9444.86	7797.06	9081.42	6158.51	9284.34	57.826	7058.56	3616.49	8127.47	5783.04	12622.9	7812.75	6531.32	9736.89
90	10133.5	8219.02	8547.82	6204.12	7331.82	62.349	7323.6	3603.24	8222.7	5979.3	12519.7	8144.81	6500.34	9411.77
120	9787.19	8318.59	9532.64	6025.79	8150.99	52.173	7082.97	3573.47	8384.15	5599.18	12370.1	8003.08	6465.5	9188.6
130	2014.9	2200.81	1641.18	1205.44	1728.9	62.719	6667.24	3514.51	8156.9	5720.05	12611.8	7446.05	6039.96	8689.13
160	2833.3	2523.39	3078.26	1580.36	1892.83	61.776	6868.87	3663.13	8220.55	5921.41	13006.8	8056.45	6390.77	9011.22
190	3021.06	2513.07	3973.9	1749.26	2335.23	59.245	6861.99	3640.74	8233.18	5602.99	13073.4	8166.79	6105.21	9136.6
220	3183.61	2725.68	3829.08	1845.89	2545.57	51.914	6971.48	3470.9	8356.01	5762.05	12666.8	7438.75	5956.31	9217.37
250	3538.42	2668.77	4363.81	2001.37	2743.7	55.79	7024.7	3633.42	8570.2	6255.57	12889	7377.85	5975.57	9561.85
280	3735.74	2570.33	4833.36	2075.88	2701.75	54.948	7065.82	3606	8632.19	6059.03	12349	7354.84	6154.63	9778.37
310	3733.96	2893.94	5021.01	2102.43	3028.66	62.086	6920.84	3652.38	8562.02	6132.32	12719.1	7392.92	6296.65	9696.55
320	3642.6	2854.05	5076.22	2069.6	2932.94	65.383	6507.65	3570.78	8271.24	5993.21	12522.7	7399.29	6077.21	9483.02
620	5062.21	2874.75	5426.56	2964.36	3895.37	65.223	6798.81	3619.11	9463.69	6228.58	13726.6	8109.66	5737.47	10525.6
920	6021.89	4633.43	6520.37	3309.88	4861.66	66.998	6564.32	3794.69	9456.94	5978.86	14145.4	7777.87	5744.21	10482.2
1220	5825.58	5163.86	7966.35	3153.47	5460.29	70.031	6291.11	3796.87	9000.5	5680.37	15211.9	7985.49	5660.85	10468.2
1520	6255.39	4815.64	7708.95	3599.93	6092.93	70.237	5759.14	3580.01	9448.69	5872.27	14902.6	8502.84	5230.84	11483.4
1820	6600.99	5779.47	8151.44	3586.73	6836.29	65.689	5540.37	3539.36	9206.22	6037.85	14403.5	7547.75	5403.55	11576
2120	6544.16	5433.66	8462.8	3359.2	7315.11	67.742	5386.74	3464.65	8988.53	6344.85	13352.8	7711.54	4999.55	9920.5
2420	6954.37	5598.66	6216.68	3821.18	7103.16	71.36	5262.59	3561.68	9665.24	5935.67	12211.2	8126.4	5143.21	10381.7
2720	6438.69	6092.28	5786.64	4068.53	6381	73.083	5354.42	3480.9	9895.08	5504.4	11838.4	7519.91	5226.97	10612.6
3020	8135.53	5966.35	7127.2	3975.48	7244.27	75.347	5218.13	3463.19	9086.26	6142.55	12795.3	7526.9	4923.03	9894.96
3320	6983.13	6338.76	5062.61	3617.36	6245.59	126.358	4601.6	3495.12	9234.74	5872.72	12926.2	7565.32	5160.81	10238.7
3620	6344.63	10967.3	5262.72	3932.18	5440.83	136.809	4549.23	3416.77	9114.91	6979.24	14414.1	7174.4	4980.33	10485.5
3920	6215.96	10069.5	5065.65	3518.37	7421.45	96.725	4837.25	3414.67	9080.84	6519.02	13264.2	7050.23	5204.62	9454.87
4220	6560.15	10066.8	6882.36	3286.26	6976.62	82.182	4776.7	3326.26	8820.05	7056.54	13251.6	7469.66	4876.34	9968.16
4520	7825.08	10593.8	7756.47	3298.16	5668.98	80.796	4438.13	3316.05	8650.96	6641.48	13255.8	7077.96	4605.49	10122.4
time
0	9256.25	8270.5	8777.11	6075.36	8346.41	6840.11	3522.26	7999.13	5470.45	12452.5	7610.23	6300.09	9773.89
30	9691.67	8173.57	9040.76	6018.65	7835.97	6873.64	3490.31	8328.6	5327.18	12438.4	7546.98	6441.87	9423.82
60	9387.03	7739.24	9023.6	6100.68	9226.51	7000.73	3558.67	8069.64	5725.21	12565.1	7754.93	6473.49	9679.06
90	10071.2	8156.67	8485.47	6141.77	7269.47	7261.25	3540.9	8160.35	5916.95	12457.4	8082.46	6437.99	9349.42
120	9735.01	8266.42	9480.47	5973.62	8098.82	7030.79	3521.29	8331.98	5547.01	12317.9	7950.91	6413.33	9136.43
130	1952.18	2138.09	1578.46	1142.72	1666.18	6604.52	3451.79	8094.18	5657.33	12549	7383.33	5977.24	8626.41
160	2771.52	2461.62	3016.48	1518.58	1831.05	6807.1	3601.36	8158.77	5859.63	12945	7994.67	6328.99	8949.45
190	2961.81	2453.83	3914.66	1690.01	2275.99	6802.74	3581.49	8173.93	5543.74	13014.2	8107.55	6045.96	9077.36
220	3131.7	2673.76	3777.17	1793.98	2493.65	6919.57	3418.98	8304.1	5710.14	12614.9	7386.83	5904.4	9165.46
250	3482.63	2612.98	4308.02	1945.58	2687.91	6968.91	3577.63	8514.41	6199.78	12833.2	7322.06	5919.78	9506.06
280	3680.79	2515.38	4778.42	2020.93	2646.81	7010.88	3551.05	8577.24	6004.08	12294.1	7299.9	6099.69	9723.42
310	3671.87	2831.86	4958.92	2040.34	2966.58	6858.76	3590.29	8499.94	6070.24	12657.1	7330.84	6234.57	9634.47
320	3577.21	2788.67	5010.83	2004.22	2867.56	6442.27	3505.39	8205.85	5927.82	12457.3	7333.91	6011.82	9417.64
620	4996.99	2809.53	5361.34	2899.14	3830.15	6733.58	3553.89	9398.47	6163.36	13661.4	8044.44	5672.24	10460.4
920	5954.89	4566.43	6453.37	3242.88	4794.66	6497.32	3727.69	9389.94	5911.87	14078.4	7710.87	5677.21	10415.2
1220	5755.55	5093.83	7896.32	3083.44	5390.26	6221.08	3726.84	8930.47	5610.34	15141.9	7915.46	5590.82	10398.2
1520	6185.15	4745.4	7638.72	3529.69	6022.69	5688.9	3509.78	9378.46	5802.03	14832.3	8432.6	5160.6	11413.1
1820	6535.3	5713.78	8085.75	3521.05	6770.6	5474.68	3473.67	9140.53	5972.16	14337.8	7482.06	5337.86	11510.3
2120	6476.42	5365.92	8395.06	3291.45	7247.37	5319	3396.91	8920.78	6277.11	13285.1	7643.8	4931.8	9852.76
2420	6883.01	5527.3	6145.32	3749.82	7031.8	5191.23	3490.32	9593.88	5864.31	12139.8	8055.04	5071.85	10310.3
2720	6365.61	6019.2	5713.56	3995.44	6307.91	5281.34	3407.82	9822	5431.32	11765.3	7446.83	5153.89	10539.5
3020	8060.19	5891	7051.86	3900.13	7168.92	5142.78	3387.84	9010.92	6067.2	12720	7451.55	4847.68	9819.62
3320	6856.78	6212.4	4936.26	3491	6119.23	4475.25	3368.76	9108.38	5746.36	12799.8	7438.97	5034.45	10112.3
3620	6207.82	10830.5	5125.91	3795.37	5304.02	4412.42	3279.96	8978.1	6842.43	14277.3	7037.59	4843.52	10348.7
3920	6119.23	9972.81	4968.93	3421.65	7324.72	4740.52	3317.95	8984.11	6422.29	13167.4	6953.5	5107.9	9358.15
4220	6477.97	9984.57	6800.17	3204.08	6894.44	4694.52	3244.08	8737.86	6974.36	13169.4	7387.48	4794.16	9885.98
4520	7744.28	10513	7675.68	3217.37	5588.18	4357.34	3235.26	8570.17	6560.69	13175	6997.16	4524.69	10041.6
	AVERAGE OF PREBLEACH
	9628.23	8121.28	8961.48	6062.02	8155.43	7001.3	3526.69	8177.94	5597.36	12446.3	7789.1	6413.35	9472.52
NORMALIZED DATA
time	b1	b2	b3	b4	b5	c1	c2	c3	c4	c5	c6	c7	c8	Average of controls
120	1	1	1	1	1	1	1	1	1	1	1	1	1	1
130	0.202756	0.263271	0.176138	0.188506	0.204303	0.943327	0.978764	0.989758	1.01071	1.00826	0.947905	0.932	0.910677	0.965175
160	0.287854	0.303107	0.336605	0.250508	0.224519	0.972261	1.02117	0.997656	1.04686	1.04007	1.02639	0.986845	0.94478	1.0045
190	0.307618	0.302148	0.436831	0.278787	0.279076	0.971639	1.01554	0.99951	0.990421	1.04563	1.04088	0.942715	0.958283	0.995578
220	0.325262	0.329229	0.421489	0.295938	0.305766	0.988326	0.969461	1.01543	1.02015	1.01355	0.948355	0.920641	0.967583	0.980437
250	0.36171	0.321745	0.480727	0.320946	0.329586	0.995373	1.01444	1.04114	1.10763	1.03109	0.940039	0.92304	1.00354	1.00704
280	0.382291	0.309727	0.533217	0.333376	0.324545	1.00137	1.00691	1.04883	1.07266	0.987774	0.937193	0.951091	1.02649	1.00404
310	0.381365	0.348696	0.553359	0.336578	0.363755	0.97964	1.01804	1.03937	1.08448	1.01694	0.941166	0.972122	1.0171	1.00861
320	0.371534	0.343378	0.559152	0.330619	0.351613	0.920153	0.993963	1.00341	1.05904	1.00089	0.94156	0.937392	0.994206	0.981327
620	0.518993	0.345946	0.598265	0.478247	0.469644	0.961761	1.00771	1.14925	1.10112	1.09763	1.03278	0.884442	1.10429	1.04237
920	0.618482	0.56228	0.720123	0.53495	0.58791	0.928015	1.057	1.1482	1.05619	1.13114	0.989956	0.885217	1.09951	1.0369
1220	0.597779	0.62722	0.88114	0.508649	0.660941	0.88856	1.05675	1.09202	1.00232	1.21658	1.01622	0.871747	1.09772	1.03024
1520	0.642398	0.584317	0.852394	0.582264	0.738488	0.812549	0.995205	1.1468	1.03657	1.19171	1.08262	0.804664	1.20487	1.03437
1820	0.678764	0.703557	0.902278	0.580837	0.830196	0.781952	0.984968	1.11771	1.06696	1.15198	0.960581	0.832303	1.21512	1.01395
2120	0.672649	0.660723	0.936794	0.542964	0.888655	0.759716	0.963201	1.09084	1.12144	1.0674	0.981345	0.76899	1.04014	0.974133
2420	0.714878	0.680595	0.685748	0.618576	0.862222	0.741466	0.98969	1.17314	1.04769	0.975378	1.03414	0.790826	1.08845	0.980098
2720	0.66114	0.741164	0.637568	0.659095	0.773461	0.754337	0.966295	1.20104	0.970335	0.945289	0.956058	0.803618	1.11264	0.9637
3020	0.837141	0.725378	0.786907	0.643371	0.879036	0.734546	0.960632	1.10186	1.08394	1.02199	0.956664	0.755873	1.03664	0.956518
3320	0.712153	0.764954	0.55083	0.575881	0.750325	0.639202	0.955221	1.11377	1.02662	1.02841	0.955048	0.784995	1.06754	0.946351
3620	0.644752	1.3336	0.571993	0.626091	0.650367	0.630228	0.930042	1.09784	1.22244	1.14711	0.903518	0.755224	1.09249	0.972363
3920	0.635551	1.22799	0.554476	0.56444	0.89814	0.677091	0.940812	1.09858	1.14738	1.05794	0.892722	0.796447	0.987926	0.949862
4220	0.67281	1.22943	0.758822	0.52855	0.84538	0.670521	0.919865	1.06847	1.24601	1.0581	0.948438	0.747527	1.04365	0.962822
4520	0.804331	1.2945	0.856519	0.530742	0.68521	0.622361	0.917364	1.04796	1.1721	1.05855	0.898327	0.705511	1.06007	0.935282
CORRECTED DATA
Time	b1	b2	b3	b4	b5			Filter out due to large abrupt change or wrong targeting.
120	1	1	1	1	1
130	0.210072	0.27277	0.182493	0.195307	0.211675
160	0.286563	0.301748	0.335096	0.249384	0.223512
190	0.308984	0.30349	0.438772	0.280026	0.280316
220	0.331752	0.335798	0.4299	0.301843	0.311867
250	0.359183	0.319497	0.477368	0.318704	0.327283
280	0.380754	0.308481	0.531072	0.332035	0.323239
310	0.378111	0.34572	0.548638	0.333705	0.360651
320	0.378604	0.349912	0.569792	0.33691	0.358304
620	0.497896	0.331884	0.573945	0.458806	0.450553
920	0.59647	0.542268	0.694494	0.515911	0.566986
1220	0.580232	0.60881	0.855276	0.493719	0.641541
1520	0.621051	0.564901	0.824069	0.562915	0.713948
1820	0.669428	0.693879	0.889867	0.572848	0.818776
2120	0.69051	0.678268	0.961669	0.557381	0.912252
2420	0.729394	0.694415	0.699673	0.631137	0.879731
2720	0.686043	0.769081	0.661584	0.683921	0.802595
3020	0.875196	0.758353	0.822679	0.672618	0.918995
3320	0.752525	0.808319	0.582057	0.608527	0.792861
3620	0.663078	1.3715	0.588251	0.643886	0.668852
3920	0.669098	1.2928	0.583744	0.594234	0.945548
4220	0.69879	1.27691	0.788124	0.548959	0.878024
4520	0.859988	1.38407	0.915786	0.567467	0.732624
	Normalize the bouton fluorescent right after bleaching to 0
Recovery Time_(sec)	b1	b2	b3	b4	b5
0	0	0	0	0	0
30	0.0968328	0.0398472	0.186668	0.0672023	0.0150157
60	0.125216	0.0422429	0.313488	0.10528	0.0870718
90	0.154039	0.0866696	0.302635	0.132393	0.127095
120	0.188765	0.0642541	0.3607	0.153346	0.14665
150	0.216072	0.0491059	0.426393	0.169913	0.141521
180	0.212727	0.100313	0.447879	0.171989	0.188978
190	0.213351	0.106077	0.473756	0.175972	0.186001
480	0.364368	0.0812865	0.478836	0.327452	0.303019
780	0.489156	0.370582	0.626295	0.398418	0.450717
1080	0.4686	0.462082	0.822969	0.370839	0.54529
1380	0.520274	0.401703	0.784796	0.45683	0.63714
1680	0.581516	0.57906	0.865282	0.469173	0.770115
1980	0.608205	0.557593	0.953112	0.449953	0.888691
2280	0.65743	0.579797	0.632631	0.541611	0.847437
2580	0.60255	0.682468	0.586038	0.607205	0.74959
2880	0.842006	0.667715	0.783095	0.593159	0.897245
3180	0.686712	0.736423	0.488759	0.513513	0.737242
3480	0.573477	1.51084	0.496335	0.557453	0.579935
3780	0.581099	1.40263	0.490822	0.49575	0.930926
4080	0.618687	1.38077	0.740826	0.439487	0.845272
4380	0.822753	1.52813	0.896987	0.462487	0.66083

## Sheet: WT 22oct F1
time	b1	b2	b3	b4	b5	background	c1	c2	c3	c4	c5	c6	c7	c8
0	12063.7	6426.75	5834.85	9368.23	6571.66	311.322	9318.01	10652.9	15420.5	8857.97	8383.59	6925.62	9289.77	12324.2
30	12040.3	6370.79	5796.85	9423.64	6512.07	362.003	9309.42	10452.5	16633.2	9031.01	8283.94	7343.14	9363.42	12763.4
60	11973.4	6564.11	5561.73	9070.28	6478.76	301.481	8998.81	9190	15438	8746.19	8466.75	6609.71	9211.66	12674
90	11822.5	6158.57	5370.03	9538.03	6535.56	300.757	8534.6	9441.32	15069.4	9412.57	8570.81	6870.31	9506.89	11904.9
120	12420.8	6513.6	5333.82	9608.94	6845.07	346.71	8970.12	9912.32	14622.3	8463.49	8620.81	7143.72	9635.1	11795.4
130	1236.64	1408.87	821.573	1745.35	1252.39	339.211	8821.87	9614.6	14425.4	8690.2	8670.32	7715.94	9595.19	11382.5
160	1681.7	1571.21	1117.18	2182.03	1488.15	337.838	8741.46	9413.99	13370.4	9413.52	8703.67	6722.58	9475.49	11704.2
190	1816.09	1711.75	1243.14	2462.25	1650.86	325.338	8991.18	10134.8	14422.4	10113.3	8816.42	6931.94	9753.72	11260.8
220	1979.81	2109.78	1229.24	2740.72	2150.42	314.259	8861.72	9953.73	14872.4	9161.1	8458.32	7136.61	8724.99	12063.1
250	2045.23	1847.66	1204.05	2910.18	2085.2	342.878	8785.89	8712.77	14431.6	9237.66	8545.28	7027.48	8961.82	12274.4
280	2090.32	1927.06	1326.97	3176.9	2328.31	377.392	7903.66	9695.72	14743	9462.9	9021.91	8218.02	8910.02	11421.7
310	2290.84	2104.45	1420.98	3385.61	2356.18	355.888	8096.56	9520.98	15786.1	8260.56	8573.94	7335.86	9680.39	11918.7
320	2306.01	2218.22	1398.94	3418.9	2406.49	385.198	8244.14	9753.93	15910	8144.14	8881.82	7134.86	9447.33	11851.6
620	3574.38	3008.04	2393.27	3649.06	3997.07	489.873	8165.67	9972.73	16104.4	8627.18	8801.92	6495.43	9963.77	12491.7
920	4203.25	3424.6	3106.77	4689.3	5342.35	517.214	8465.59	9749.8	15187.2	9182.58	8569.41	7684.21	9184.44	13328.7
1220	4171.23	4014.57	3126.79	6112.28	5477.34	491.65	8426.96	10419.7	17446.1	8389.75	8568.45	9125.96	8316.82	13566.8
1520	2910.11	4748.55	3171.38	5502.58	6285.89	340.926	8180.23	9632.82	15967.6	7137.38	8758.42	8177.89	8248.86	14124
1820	2357.36	4257.23	3710.95	5805.85	6183.4	544.833	8519.28	10279.7	16695.2	8562.26	9121.24	7817.08	9382.14	13595.3
2120	1998.47	4927.08	3588.3	6292.69	7264.17	867.293	7873.97	10768.5	16313.2	8086.09	8730.11	8506.44	9254.69	14031.1
2420	1248.79	5202.13	3465.52	6466.51	6728.45	856.65	8930.43	11467.9	16326.9	8386.29	8812.09	8360.81	8757.76	14006.9
2720	2106.93	4917.66	4433.85	6761.52	6492.66	369.982	9125.88	12154	16974.2	7828.17	8517.84	7531.37	9003.23	13547
3020	4647.51	5152.39	3898.06	6489.73	7628.85	404.21	9669.07	11859.1	16562.7	7733.1	8311.86	7729.92	9264.73	14650
3320	5049.46	5494.29	3763.84	6837.35	9167.06	677.833	10169.1	11674	16116.2	8191.8	8228.15	7324.81	9587.17	14021.4
3620	4870.31	5718.42	4225.9	7076.91	9546.37	436.026	9393.81	10773.6	8771.75	8141.34	8891.05	8374.99	9524.26	14422.9
3920	5524.81	5119.05	4029.27	7203.96	9721.34	309.196	9361.51	11794.2	14958.4	8770.65	8966.69	7946.81	8801.81	12984.2
4220	7953.53	5019.95	4264.48	5781.36	11056.6	221.594	8676.52	12457.4	16208.6	8069.48	8883.73	8018.88	8955.24	11864
4520	8079.14	5228.59	3589.36	6147.46	10740.1	180.374	9699.14	13488	16183.1	8005.63	8313.92	8926.78	8919.13	13102.7
time
0	11752.4	6115.43	5523.53	9056.91	6260.34	9006.69	10341.6	15109.2	8546.65	8072.27	6614.3	8978.44	12012.9
30	11678.3	6008.78	5434.85	9061.64	6150.07	8947.41	10090.5	16271.2	8669.01	7921.94	6981.14	9001.42	12401.4
60	11671.9	6262.63	5260.25	8768.8	6177.28	8697.33	8888.51	15136.5	8444.71	8165.26	6308.23	8910.18	12372.6
90	11521.7	5857.82	5069.28	9237.27	6234.8	8233.85	9140.57	14768.6	9111.81	8270.06	6569.56	9206.14	11604.2
120	12074.1	6166.89	4987.11	9262.23	6498.36	8623.41	9565.61	14275.6	8116.78	8274.1	6797.01	9288.39	11448.7
130	897.427	1069.66	482.362	1406.14	913.18	8482.66	9275.39	14086.2	8350.99	8331.11	7376.73	9255.98	11043.3
160	1343.86	1233.38	779.347	1844.19	1150.31	8403.62	9076.15	13032.5	9075.68	8365.83	6384.74	9137.65	11366.3
190	1490.76	1386.41	917.805	2136.92	1325.53	8665.84	9809.46	14097	9787.99	8491.08	6606.6	9428.38	10935.5
220	1665.55	1795.52	914.982	2426.46	1836.16	8547.46	9639.47	14558.1	8846.84	8144.06	6822.35	8410.73	11748.9
250	1702.35	1504.78	861.17	2567.3	1742.32	8443.01	8369.89	14088.8	8894.78	8202.4	6684.6	8618.94	11931.6
280	1712.93	1549.67	949.582	2799.51	1950.92	7526.27	9318.33	14365.6	9085.5	8644.52	7840.63	8532.63	11044.3
310	1934.95	1748.56	1065.1	3029.72	2000.29	7740.67	9165.09	15430.2	7904.67	8218.06	6979.98	9324.5	11562.8
320	1920.81	1833.02	1013.75	3033.7	2021.29	7858.94	9368.73	15524.8	7758.94	8496.62	6749.66	9062.13	11466.4
620	3084.51	2518.17	1903.39	3159.19	3507.2	7675.79	9482.86	15614.5	8137.31	8312.05	6005.56	9473.9	12001.8
920	3686.03	2907.39	2589.56	4172.09	4825.13	7948.38	9232.59	14670	8665.37	8052.19	7167	8667.22	12811.5
1220	3679.58	3522.92	2635.14	5620.64	4985.69	7935.31	9928.08	16954.5	7898.1	8076.8	8634.31	7825.17	13075.2
1520	2569.18	4407.62	2830.46	5161.65	5944.97	7839.3	9291.89	15626.7	6796.46	8417.5	7836.96	7907.93	13783.1
1820	1812.52	3712.4	3166.12	5261.02	5638.57	7974.45	9734.9	16150.3	8017.42	8576.4	7272.25	8837.31	13050.5
2120	1131.17	4059.79	2721.01	5425.39	6396.87	7006.68	9901.22	15445.9	7218.8	7862.82	7639.15	8387.39	13163.8
2420	392.143	4345.48	2608.87	5609.86	5871.8	8073.78	10611.3	15470.2	7529.64	7955.44	7504.16	7901.11	13150.2
2720	1736.95	4547.68	4063.87	6391.53	6122.68	8755.9	11784.1	16604.2	7458.19	8147.86	7161.39	8633.25	13177
3020	4243.3	4748.18	3493.85	6085.52	7224.64	9264.86	11454.8	16158.5	7328.89	7907.65	7325.71	8860.52	14245.8
3320	4371.63	4816.46	3086.01	6159.52	8489.23	9491.23	10996.2	15438.4	7513.97	7550.32	6646.98	8909.33	13343.6
3620	4434.28	5282.39	3789.88	6640.88	9110.35	8957.78	10337.5	8335.73	7705.32	8455.02	7938.97	9088.23	13986.9
3920	5215.61	4809.85	3720.07	6894.76	9412.15	9052.32	11485	14649.2	8461.46	8657.49	7637.62	8492.61	12675
4220	7731.94	4798.35	4042.89	5559.76	10835	8454.93	12235.8	15987	7847.89	8662.14	7797.28	8733.65	11642.4
4520	7898.77	5048.21	3408.99	5967.09	10559.7	9518.76	13307.6	16002.7	7825.26	8133.55	8746.41	8738.75	12922.4
	AVERAGE OF PREBLEACH
	11739.7	6082.31	5255	9077.37	6264.17	8701.74	9605.35	15112.2	8577.79	8140.72	6654.05	9076.91	11968
NORMALIZED DATA
time	b1	b2	b3	b4	b5	c1	c2	c3	c4	c5	c6	c7	c8	Average of controls
120	1	1	1	1	1	1	1	1	1	1	1	1	1	1
130	0.076444	0.175864	0.091791	0.154906	0.145778	0.974824	0.965649	0.932107	0.973559	1.02339	1.10861	1.01973	0.92274	0.990075
160	0.114472	0.202781	0.148306	0.203163	0.183634	0.965741	0.944906	0.862385	1.05804	1.02765	0.959527	1.00669	0.949732	0.971835
190	0.126985	0.227942	0.174654	0.235411	0.211604	0.995875	1.02125	0.932824	1.14109	1.04304	0.992869	1.03872	0.913728	1.00992
220	0.141874	0.295204	0.174116	0.267309	0.293122	0.982271	1.00355	0.963337	1.03137	1.00041	1.02529	0.926607	0.981694	0.989316
250	0.145009	0.247403	0.163876	0.282825	0.278141	0.970268	0.871378	0.932276	1.03695	1.00758	1.00459	0.949545	0.996959	0.971194
280	0.14591	0.254783	0.180701	0.308405	0.31144	0.864916	0.970119	0.950598	1.05919	1.06189	1.17832	0.940036	0.922827	0.993487
310	0.164821	0.287483	0.202682	0.333766	0.319323	0.889555	0.954166	1.02104	0.921528	1.0095	1.04898	1.02728	0.96615	0.979775
320	0.163617	0.301369	0.192911	0.334205	0.322675	0.903147	0.975366	1.0273	0.904539	1.04372	1.01437	0.998371	0.95809	0.978112
620	0.262742	0.414015	0.362206	0.348029	0.559882	0.882099	0.987248	1.03324	0.948649	1.02104	0.902542	1.04374	1.00283	0.977673
920	0.313981	0.478007	0.49278	0.459614	0.770275	0.913424	0.961192	0.970736	1.01021	0.989125	1.07709	0.954865	1.07048	0.993391
1220	0.313431	0.579207	0.501453	0.619192	0.795906	0.911922	1.0336	1.12191	0.920762	0.992148	1.2976	0.862096	1.09252	1.02907
1520	0.218846	0.724662	0.538621	0.568629	0.949043	0.90089	0.967367	1.03404	0.792332	1.034	1.17777	0.871214	1.15167	0.991161
1820	0.154393	0.61036	0.602497	0.579575	0.90013	0.91642	1.01349	1.06869	0.934672	1.05352	1.09291	0.973603	1.09045	1.01797
2120	0.0963548	0.667474	0.517794	0.597683	1.02118	0.805204	1.0308	1.02208	0.841568	0.965863	1.14805	0.924036	1.09992	0.97969
2420	0.0334032	0.714445	0.496455	0.618005	0.937363	0.927835	1.10472	1.02369	0.877806	0.97724	1.12776	0.870462	1.09879	1.00104
2720	0.147955	0.747689	0.773333	0.704118	0.977412	1.00622	1.22682	1.09873	0.869477	1.00088	1.07625	0.951121	1.10102	1.04131
3020	0.36145	0.780653	0.664862	0.670405	1.15333	1.06471	1.19255	1.06923	0.854403	0.97137	1.10094	0.97616	1.19033	1.05246
3320	0.372381	0.79188	0.587252	0.678558	1.3552	1.09073	1.1448	1.02158	0.87598	0.927475	0.998938	0.981538	1.11494	1.0195
3620	0.377718	0.868485	0.721194	0.731587	1.45436	1.02942	1.07623	0.551589	0.898287	1.03861	1.1931	1.00125	1.1687	0.994648
3920	0.444272	0.790794	0.70791	0.759555	1.50254	1.04029	1.19569	0.969364	0.986438	1.06348	1.14782	0.935627	1.05908	1.04972
4220	0.658617	0.788903	0.76934	0.612486	1.72968	0.971637	1.27386	1.05788	0.914908	1.06405	1.17181	0.962183	0.9728	1.04864
4520	0.672827	0.829982	0.648713	0.657358	1.68574	1.09389	1.38544	1.05893	0.912269	0.999118	1.31445	0.962745	1.07975	1.10082
CORRECTED DATA
Time	b1	b2	b3	b4	b5			Filter out due to large abrupt change or wrong targeting.
120	1	1	1	1	1
130	0.0772103	0.177627	0.0927111	0.156459	0.14724
160	0.117789	0.208658	0.152604	0.209051	0.188956
190	0.125737	0.225702	0.172937	0.233098	0.209525
220	0.143406	0.298391	0.175997	0.270196	0.296287
250	0.14931	0.254741	0.168737	0.291213	0.286391
280	0.146866	0.256453	0.181885	0.310427	0.313482
310	0.168224	0.293417	0.206866	0.340656	0.325914
320	0.167278	0.308113	0.197227	0.341683	0.329896
620	0.268743	0.423469	0.370478	0.355977	0.572668
920	0.31607	0.481188	0.496058	0.462672	0.7754
1220	0.304577	0.562845	0.487288	0.601701	0.773423
1520	0.220798	0.731125	0.543425	0.5737	0.957507
1820	0.151668	0.599585	0.591861	0.569345	0.884241
2120	0.0983523	0.681312	0.528528	0.610074	1.04235
2420	0.0333686	0.713704	0.49594	0.617365	0.936391
2720	0.142085	0.718024	0.742651	0.676182	0.938633
3020	0.343433	0.74174	0.63172	0.636988	1.09584
3320	0.365259	0.776735	0.576021	0.66558	1.32929
3620	0.37975	0.873158	0.725075	0.735523	1.46218
3920	0.423228	0.753335	0.674378	0.723576	1.43136
4220	0.628067	0.75231	0.733655	0.584076	1.64945
4520	0.611204	0.753966	0.589299	0.597152	1.53134
	Normalize the bouton fluorescent right after bleaching to 0
Recovery Time_(sec)	b1	b2	b3	b4	b5
0	0	0	0	0	0
30	0.0439744	0.0377335	0.0660128	0.0623473	0.0489191
60	0.0525867	0.0584594	0.0884241	0.0908543	0.0730397
90	0.071734	0.146849	0.091796	0.134833	0.174783
120	0.0781319	0.0937706	0.0837944	0.159749	0.163177
150	0.075484	0.0958525	0.0982863	0.182526	0.194946
180	0.0986284	0.140801	0.12582	0.218362	0.209525
190	0.0976041	0.15867	0.115196	0.219579	0.214194
480	0.207558	0.298943	0.30615	0.236524	0.498884
780	0.258845	0.369128	0.444563	0.36301	0.73662
1080	0.246391	0.468423	0.434897	0.527825	0.734302
1380	0.155602	0.67305	0.496769	0.49463	0.95017
1680	0.0806872	0.513099	0.550156	0.489467	0.864253
1980	0.022911	0.612477	0.480351	0.537751	1.04967
2280	-0.0475099	0.651867	0.444433	0.546394	0.925408
2580	0.070303	0.657119	0.716354	0.61612	0.928038
2880	0.288497	0.685958	0.594088	0.569657	1.11238
3180	0.31215	0.728512	0.532696	0.603552	1.38614
3480	0.327854	0.845761	0.696982	0.686469	1.54199
3780	0.374969	0.700058	0.641105	0.672306	1.50585
4080	0.596947	0.69881	0.706438	0.506931	1.76158
4380	0.578673	0.700824	0.547331	0.522432	1.62309

## Sheet: WT 22oct F4
time	b1	b2	b3	b4	b5	background	c1	c2	c3	c4	c5	c6	c7	c8
0	5641.37	8604.75	5914.12	10170.1	8261	74.829	8192.01	4434.31	12355.4	11981.3	13935.8	6376.72	5496.56	5877.7
30	5309.62	8765.96	5683.86	9461.35	8584.05	74.141	7912.81	4298.57	12611.3	14929.3	13245.5	6094.94	5595.16	6206.82
60	5536.1	9070.63	5401.3	9535.19	8345.1	80.293	8733.31	4259.91	12675.2	14534	13648.1	5964.67	5648.06	5843.76
90	5633.99	9222.6	5454.08	9430.68	8011.68	68.618	8608.73	4222.93	11740.3	12460.8	13732.7	5672.81	5617.6	5459.02
120	5701.07	9060.63	5524.74	9513	8245.46	70.091	8458.05	4554.26	12394.5	13068.3	13994.2	5587.68	5619.01	5549.18
130	685.324	1457.57	1330.52	1928.56	1718.29	80.148	8626.77	4242.08	9827.42	11834.4	14153.6	5093.83	5594.79	5608.54
160	910.781	1550.8	1949.07	2326.43	2412.81	72.668	8324.42	4440.96	11368.2	11306.9	13715.7	5423.38	5655.4	5509.39
190	1014.57	1789.82	2279.6	2553.21	3095.19	72.481	8257.37	4588.64	11773.5	11308.1	14130	5867.26	5477.97	5599.17
220	1062.79	1830.56	2144.7	2502.98	3590.78	77.319	8315.21	4400.77	11627	11083.8	13968.2	5153.39	5396.76	5388.39
250	1221.99	2230.11	2097.03	2688.92	3916.42	73.979	8417.02	4629.51	10941.1	11108.8	13434.4	5037.59	5396.81	5728.86
280	1232.54	2443.31	2446.79	2687.9	3977.7	63.625	8049.7	4808.72	11308.6	11323.3	13466.8	5130.09	5289.35	5524.57
310	1312.37	2564.03	2383.3	2755.38	4280.58	66.692	8184.55	4824.58	10399.8	11018.5	13317.9	5561.91	5242.98	5633.62
320	1273.98	2537.79	2579.28	2599.97	4757.3	73.15	8049.58	4602.32	11456.1	10486.8	13078.7	5572.27	5142.21	5536.52
620	1823.81	3072.18	2479.43	3721.36	4389.1	69.851	7989.44	4058.23	11821.7	11664.3	13772.1	5607.87	5316.99	5004.38
920	2072.97	3595.95	3501.88	3596.78	5441.11	62.795	7542.67	3856.88	11129.2	12071.8	13947.5	5503.98	5251.54	5448.03
1220	2521.3	4774.63	3818.13	4100.98	5329.16	64.336	7042.49	3557.93	10310	10314.2	14738.4	5242.46	5174.98	5200.11
1520	2834.81	4742.48	4080.3	3999.47	6060.82	66.316	7190.78	3270.7	11880.2	9802.95	14117.4	5151.76	4931.23	4895.2
1820	2797.93	4958.33	4309.44	4528.48	5751.55	67.254	7395.11	3505.64	11680.1	9887.94	14497.1	5216.54	4965.71	4462.85
2120	2927.99	5093.01	3982.84	4938.35	4644.56	61.222	6923.47	3777.14	10651.3	10052.2	13958.6	4875.22	5136.52	4749.27
2420	3243.11	5869.7	3964.13	5205.61	7156.66	62.146	7284.4	3487.53	10431.2	9220.63	14421.5	4901.58	4988.76	4099.03
2720	3260.32	6093.57	4062.84	5035.61	6503.46	67.079	7241.64	3907.68	10713.8	10012.7	13161.4	4988.59	4854.49	4054.05
3020	3563.16	6475.37	3463.24	7140.81	6615.55	65.72	6580.59	3647.43	9949.63	9489.81	13732.9	4940.04	4871.49	4489.35
3320	3543.54	6130.03	4253.35	6461.64	6776.28	62.976	7371.87	3911.17	10370.9	11861.9	12842.5	4919.27	4963.83	4976.74
3620	3487.48	5872.75	3953.68	5551.73	7499.21	70.233	7927.36	5277.58	10979.5	11812.1	13181.9	4683.11	4774.48	4583.54
3920	3684.04	6729.7	3727.64	5490.72	7278.71	75.205	7594.81	4176.38	11016.3	10860.8	12788.6	4632.97	4986.06	4638.51
4220	3677.52	6123.78	3752.19	5787.61	7235.72	67.542	7906.84	5141.67	11313.1	10731.2	13427.1	4336.08	4884.29	4311.72
4520	3262.8	6220.6	3499.78	6055.79	6991.45	68.851	7518.26	4263.38	11842.3	10578.9	12152.8	4990.49	4795.31	4264.01
time
0	5566.54	8529.92	5839.29	10095.2	8186.17	8117.18	4359.48	12280.5	11906.4	13860.9	6301.89	5421.73	5802.87
30	5235.48	8691.82	5609.72	9387.21	8509.91	7838.67	4224.43	12537.1	14855.2	13171.4	6020.8	5521.02	6132.68
60	5455.8	8990.34	5321	9454.9	8264.81	8653.02	4179.61	12595	14453.7	13567.8	5884.37	5567.76	5763.47
90	5565.37	9153.99	5385.46	9362.06	7943.06	8540.11	4154.31	11671.6	12392.1	13664	5604.2	5548.98	5390.4
120	5630.98	8990.54	5454.65	9442.91	8175.37	8387.95	4484.17	12324.4	12998.2	13924.1	5517.59	5548.92	5479.09
130	605.176	1377.42	1250.37	1848.42	1638.14	8546.62	4161.93	9747.28	11754.2	14073.4	5013.68	5514.64	5528.39
160	838.113	1478.13	1876.4	2253.76	2340.14	8251.75	4368.29	11295.5	11234.2	13643	5350.71	5582.74	5436.72
190	942.087	1717.34	2207.12	2480.73	3022.71	8184.89	4516.16	11701	11235.7	14057.5	5794.77	5405.49	5526.69
220	985.473	1753.24	2067.38	2425.66	3513.46	8237.9	4323.45	11549.7	11006.5	13890.9	5076.07	5319.44	5311.07
250	1148.01	2156.13	2023.05	2614.94	3842.44	8343.05	4555.53	10867.1	11034.8	13360.4	4963.61	5322.83	5654.88
280	1168.92	2379.69	2383.16	2624.28	3914.07	7986.08	4745.1	11245	11259.7	13403.2	5066.47	5225.72	5460.94
310	1245.68	2497.34	2316.61	2688.69	4213.89	8117.85	4757.89	10333.1	10951.8	13251.2	5495.22	5176.29	5566.92
320	1200.83	2464.64	2506.13	2526.82	4684.15	7976.43	4529.17	11382.9	10413.6	13005.5	5499.12	5069.06	5463.37
620	1753.95	3002.33	2409.58	3651.51	4319.25	7919.59	3988.38	11751.8	11594.5	13702.2	5538.02	5247.14	4934.53
920	2010.18	3533.15	3439.09	3533.99	5378.31	7479.87	3794.08	11066.4	12009	13884.7	5441.18	5188.74	5385.23
1220	2456.96	4710.3	3753.8	4036.64	5264.82	6978.16	3493.59	10245.7	10249.9	14674	5178.13	5110.64	5135.77
1520	2768.49	4676.16	4013.99	3933.15	5994.5	7124.46	3204.38	11813.9	9736.63	14051.1	5085.44	4864.91	4828.88
1820	2730.67	4891.08	4242.18	4461.23	5684.29	7327.86	3438.38	11612.8	9820.69	14429.9	5149.29	4898.46	4395.59
2120	2866.77	5031.79	3921.62	4877.13	4583.34	6862.25	3715.92	10590.1	9990.96	13897.4	4814	5075.3	4688.05
2420	3180.97	5807.55	3901.98	5143.47	7094.51	7222.25	3425.38	10369	9158.48	14359.3	4839.43	4926.61	4036.88
2720	3193.24	6026.5	3995.76	4968.53	6436.38	7174.56	3840.6	10646.7	9945.59	13094.3	4921.51	4787.41	3986.97
3020	3497.44	6409.65	3397.52	7075.09	6549.83	6514.86	3581.71	9883.91	9424.09	13667.2	4874.32	4805.77	4423.63
3320	3480.57	6067.06	4190.38	6398.67	6713.31	7308.89	3848.2	10307.9	11798.9	12779.5	4856.29	4900.85	4913.76
3620	3417.25	5802.51	3883.45	5481.5	7428.97	7857.13	5207.34	10909.2	11741.9	13111.7	4612.88	4704.25	4513.3
3920	3608.84	6654.49	3652.44	5415.52	7203.5	7519.6	4101.17	10941.1	10785.6	12713.4	4557.77	4910.86	4563.3
4220	3609.97	6056.23	3684.65	5720.07	7168.18	7839.3	5074.13	11245.5	10663.7	13359.6	4268.54	4816.75	4244.18
4520	3193.95	6151.75	3430.93	5986.94	6922.6	7449.41	4194.53	11773.5	10510	12084	4921.64	4726.46	4195.16
	AVERAGE OF PREBLEACH
	5490.83	8871.32	5522.02	9548.46	8215.86	8307.39	4280.4	12281.7	13321.1	13637.7	5865.77	5521.68	5713.7
NORMALIZED DATA
time	b1	b2	b3	b4	b5	c1	c2	c3	c4	c5	c6	c7	c8	Average of controls
120	1	1	1	1	1	1	1	1	1	1	1	1	1	1
130	0.110216	0.155267	0.226433	0.193583	0.199387	1.0288	0.972322	0.79364	0.882374	1.03195	0.854736	0.998725	0.967566	0.941264
160	0.152639	0.166619	0.339803	0.236034	0.284832	0.993303	1.02053	0.919702	0.843339	1.00039	0.912192	1.01106	0.951523	0.956505
190	0.171574	0.193584	0.399694	0.259804	0.367911	0.985254	1.05508	0.952716	0.843446	1.03079	0.987897	0.978956	0.967269	0.975175
220	0.179476	0.19763	0.374389	0.254037	0.427643	0.991635	1.01006	0.940394	0.826245	1.01857	0.865371	0.963372	0.929532	0.943147
250	0.209077	0.243045	0.36636	0.273859	0.467686	1.00429	1.06428	0.88482	0.828367	0.979671	0.8462	0.963986	0.989705	0.945165
280	0.212885	0.268245	0.431575	0.274838	0.476405	0.961322	1.10856	0.915589	0.845249	0.982805	0.863735	0.9464	0.955762	0.947428
310	0.226865	0.281507	0.419521	0.281583	0.512897	0.977185	1.11155	0.841341	0.822141	0.971662	0.936828	0.937448	0.974311	0.946559
320	0.218698	0.277821	0.453842	0.264631	0.570135	0.960161	1.05812	0.926818	0.781738	0.953647	0.937493	0.918027	0.956187	0.936524
620	0.319433	0.338431	0.436359	0.382418	0.525721	0.953319	0.931776	0.956856	0.870383	1.00473	0.944126	0.950279	0.86363	0.934388
920	0.366097	0.398267	0.622794	0.370111	0.654626	0.900388	0.886385	0.901044	0.901499	1.01811	0.927616	0.939703	0.942511	0.927157
1220	0.447465	0.530958	0.679786	0.422753	0.640812	0.839994	0.816183	0.834222	0.769444	1.07599	0.882771	0.925559	0.898852	0.880377
1520	0.504203	0.52711	0.726905	0.411915	0.729626	0.857606	0.748618	0.961911	0.730916	1.03032	0.866969	0.881056	0.84514	0.865316
1820	0.497315	0.551336	0.76823	0.467219	0.691868	0.88209	0.803285	0.945537	0.737226	1.05809	0.877854	0.887131	0.769307	0.870065
2120	0.522101	0.567198	0.710178	0.510777	0.557865	0.826042	0.868124	0.862263	0.750008	1.01905	0.820693	0.919157	0.820492	0.860728
2420	0.579323	0.654644	0.706622	0.53867	0.863514	0.869377	0.800247	0.844266	0.687515	1.05292	0.825029	0.89223	0.706527	0.834763
2720	0.581558	0.679324	0.723604	0.520348	0.783409	0.863636	0.897252	0.866871	0.746603	0.960158	0.839022	0.86702	0.697791	0.842294
3020	0.63696	0.722514	0.615267	0.740966	0.797218	0.784226	0.83677	0.804765	0.707454	1.00216	0.830977	0.870345	0.774213	0.826364
3320	0.633887	0.683896	0.758848	0.670125	0.817115	0.879807	0.899027	0.839292	0.88573	0.937073	0.827904	0.887565	0.859996	0.877049
3620	0.622355	0.654076	0.703265	0.574071	0.904223	0.9458	1.21656	0.888248	0.881446	0.96143	0.786407	0.851959	0.789909	0.915219
3920	0.657248	0.750113	0.661431	0.567161	0.87678	0.905171	0.958128	0.890846	0.809661	0.932229	0.777011	0.889377	0.798659	0.870135
4220	0.657455	0.682676	0.667264	0.599057	0.872481	0.943654	1.18543	0.915632	0.800507	0.979611	0.727703	0.872333	0.742807	0.89596
4520	0.581687	0.693442	0.621318	0.627005	0.842589	0.896721	0.979938	0.958616	0.788972	0.886072	0.839044	0.855982	0.734227	0.867447
CORRECTED DATA
Time	b1	b2	b3	b4	b5			Filter out due to large abrupt change or wrong targeting.
120	1	1	1	1	1
130	0.117093	0.164956	0.240563	0.205662	0.211829
160	0.159579	0.174195	0.355254	0.246767	0.297784
190	0.175942	0.198512	0.409869	0.266418	0.377277
220	0.190295	0.209544	0.396957	0.269351	0.453422
250	0.221207	0.257146	0.387615	0.289748	0.494819
280	0.224698	0.283129	0.455522	0.290088	0.50284
310	0.239673	0.297401	0.443207	0.297481	0.541854
320	0.233521	0.296651	0.484603	0.282568	0.608778
620	0.341864	0.362196	0.467	0.409272	0.562637
920	0.39486	0.429557	0.671725	0.399189	0.706057
1220	0.508266	0.603103	0.772153	0.480196	0.727884
1520	0.58268	0.609153	0.840045	0.476028	0.843189
1820	0.571584	0.633673	0.882957	0.536994	0.795191
2120	0.606581	0.658974	0.82509	0.593424	0.648131
2420	0.693997	0.784227	0.846494	0.645296	1.03444
2720	0.690446	0.806516	0.859087	0.617775	0.93009
3020	0.770798	0.874328	0.744547	0.896658	0.964729
3320	0.722749	0.779769	0.865229	0.764068	0.931665
3620	0.680007	0.714666	0.768412	0.62725	0.987985
3920	0.75534	0.862065	0.760148	0.651808	1.00764
4220	0.733799	0.761949	0.744747	0.66862	0.973794
4520	0.670574	0.799406	0.716261	0.722817	0.971344
	Normalize the bouton fluorescent right after bleaching to 0
Recovery Time_(sec)	b1	b2	b3	b4	b5
0	0	0	0	0	0
30	0.0481208	0.0110648	0.151022	0.0517472	0.109057
60	0.0666537	0.0401848	0.222937	0.0764861	0.209914
90	0.0829098	0.0533959	0.205934	0.080178	0.306523
120	0.117922	0.110402	0.193634	0.105856	0.359047
150	0.121875	0.141518	0.283051	0.106284	0.369223
180	0.138837	0.158608	0.266834	0.115592	0.418723
190	0.131869	0.157711	0.321343	0.0968173	0.503633
480	0.25458	0.236203	0.298164	0.256326	0.445091
780	0.314604	0.316871	0.567738	0.243633	0.627056
1080	0.443051	0.524699	0.699979	0.345613	0.654749
1380	0.527334	0.531945	0.789377	0.340366	0.801045
1680	0.514766	0.561308	0.845882	0.417117	0.740147
1980	0.554405	0.591607	0.769685	0.488157	0.553563
2280	0.653414	0.741602	0.797868	0.55346	1.0437
2580	0.649392	0.768295	0.81445	0.518813	0.911301
2880	0.740401	0.849503	0.663628	0.869902	0.95525
3180	0.68598	0.736264	0.822538	0.702983	0.913299
3480	0.637569	0.6583	0.695052	0.530741	0.984756
3780	0.722892	0.834817	0.684171	0.561657	1.00969
4080	0.698495	0.714924	0.663892	0.582822	0.966751
4380	0.626885	0.75978	0.626382	0.651052	0.963643

## Sheet: WT 10nov
time	b1	b2	b3	b4	b5	background	c1	c2	c3	c4	c5	c6	c7	c8
0	4871.56	5003.68	5933.95	4838.85	6472.25	222.976	7702.24	5113.16	13964	2818.98	5872.36	6538.89	5599.41	5795.13
30	5187.71	4725.9	6140.73	5933.35	6869.14	89.386	8247.78	4809.19	13649.3	3018.04	6112.09	6311.26	5571.41	4976.56
60	4857.97	4931.01	6051.82	5296.64	6672.71	145.027	8111.55	5137.3	13933	2869.63	5559.2	6431.96	6681.93	4868.32
90	4821.4	4640.15	5972.51	5082.64	6699.93	147.872	9213.96	4930.28	13013.2	2894.6	5447.89	6477.35	5914.22	4650.94
120	4637.06	4641.61	6001.52	5043.88	6929.57	233.63	8354.59	5255.41	13992.9	2818.84	5517.74	6459.9	6134.92	5349.26
130	1120.27	1088.67	1380.94	1459.19	2291.88	156.409	8349.94	5182.38	12582.3	2667.02	5196.51	6406.31	5981.2	5932.21
160	1117.03	1397.28	1703.9	1419.38	2649.67	117.243	8522.35	4954.08	12920.1	2981.71	5107.12	6204.77	5981.65	6346.41
190	1225.15	1537.99	1699.95	1420.87	3419.98	168.108	8507.6	4819.28	12736.5	3065.34	5367.61	6598.37	6646.51	5909.59
220	1336.69	1352.99	1963.62	1910.37	3916.07	146.239	8270.48	4613.83	13433.4	3118.98	4751.75	6506.56	5080.59	5432.15
250	1428.43	1416.06	2058.44	1880.2	3951.99	168.662	9345.01	4691.78	14323.5	3160.03	4805.23	6528.8	5215	5210.14
280	1573.41	1579.64	2097.76	1897.98	3981.48	122.592	8930.13	4852.86	14729.9	3144.29	5108.14	6565.26	6294.97	5170.67
310	1557.71	1892.62	2203.69	2039.3	4162.83	162.375	9466.73	4654.2	15393.6	3351.85	5224.75	6547.76	6118.81	5317.63
320	1529.14	1893.85	2099.1	1842.26	3893.67	173.509	9047.23	4514.32	14118.3	3177.89	5333.34	6461.73	6138.91	5038.99
620	2216.38	1231.02	2654.86	2385.05	3851.24	142.135	8880.77	4478.86	15365.7	3074.76	5525.66	6200.62	5680.43	6274.76
920	2356.09	1457.57	3508.64	2647.47	4375.36	170.351	8854.67	4940.19	13853.6	3687.04	7769.43	6032.66	4704.63	5009.04
1220	2730.69	1867.07	3802.52	2573.53	4603.31	168.756	8672.42	4782.14	13248.8	2959.35	7844.77	6190.91	6090.51	6181.53
1520	2124.08	1758.92	3961.3	3703.64	5794.14	188.763	8718.05	5420.57	12972.3	3453.91	7097.77	6004.76	7815.55	8090.85
1820	2796.08	2556.89	4229.74	4638.87	4362.67	176.831	8400.81	4475.81	12874.6	3137.82	7138.77	6229.08	7944.76	5982.66
2120	3143.05	2316.06	4428.83	3532.42	4965.84	134.753	8611.59	4837.49	13616.2	2950.47	7529.91	6003.82	6429.88	6747.56
2420	2657.49	2458.56	4565.52	3219.63	4300.78	185.946	9490.41	4851.66	15426.5	2742.36	8788.13	6062.95	4905.12	6586.33
2720	3044.03	1985.18	5033.52	4148.6	4415.77	128.914	10281.9	5105.05	13206.8	3482.39	7094.1	5872.47	6425.02	7029.94
3020	3440.04	2259.36	5391.38	2486.37	3534.68	198.331	9451.44	4483.7	14743.5	2887.23	6810.75	5933.97	6018.77	6191.77
3320	3443.68	2216.68	5553.6	4537.54	3895.8	184.8	10363.6	4963.72	13208.5	2998.41	5879.02	6000.83	5861.12	7843.08
3620	3694.25	1473.62	6267.75	3419.27	3761.8	309.547	9494.95	4713.21	12657.3	2521.98	7236.67	5725.44	5406.25	6851.7
3920	3609.31	1522.36	5675.6	5878	3878.58	171.399	9035.97	5061.97	13027.4	3753.32	6471.27	5752.68	6091.69	6455.03
4220	2926.22	2237.24	5708.52	5634.64	3982.99	154.489	7965.43	5304.8	13649.9	2858.17	6283.55	5912.43	5580.24	7135.05
4520	2669.23	1971.87	5870.56	6353.64	4063.1	326.151	8732.59	5389.25	12677.1	3092.96	6500.36	5619.75	5970.65	6543.13
time
0	4648.58	4780.7	5710.98	4615.87	6249.28	7479.27	4890.19	13741.1	2596	5649.38	6315.92	5376.43	5572.16
30	5098.32	4636.51	6051.35	5843.97	6779.75	8158.4	4719.8	13560	2928.66	6022.71	6221.88	5482.02	4887.18
60	4712.94	4785.98	5906.79	5151.61	6527.68	7966.53	4992.27	13787.9	2724.6	5414.17	6286.93	6536.9	4723.29
90	4673.53	4492.28	5824.64	4934.77	6552.06	9066.09	4782.41	12865.3	2746.73	5300.01	6329.48	5766.35	4503.07
120	4403.43	4407.98	5767.89	4810.24	6695.94	8120.96	5021.78	13759.3	2585.21	5284.11	6226.27	5901.29	5115.63
130	963.858	932.264	1224.53	1302.78	2135.47	8193.53	5025.97	12425.9	2510.61	5040.1	6249.9	5824.8	5775.8
160	999.788	1280.03	1586.65	1302.14	2532.43	8405.1	4836.84	12802.9	2864.47	4989.87	6087.53	5864.41	6229.17
190	1057.04	1369.88	1531.84	1252.77	3251.87	8339.49	4651.18	12568.4	2897.23	5199.5	6430.26	6478.4	5741.48
220	1190.45	1206.75	1817.38	1764.13	3769.83	8124.24	4467.59	13287.1	2972.74	4605.51	6360.33	4934.35	5285.92
250	1259.77	1247.4	1889.78	1711.54	3783.32	9176.35	4523.12	14154.8	2991.37	4636.56	6360.13	5046.34	5041.47
280	1450.82	1457.04	1975.16	1775.39	3858.89	8807.54	4730.27	14607.3	3021.7	4985.54	6442.66	6172.38	5048.08
310	1395.34	1730.24	2041.32	1876.92	4000.45	9304.35	4491.82	15231.2	3189.48	5062.38	6385.39	5956.44	5155.26
320	1355.64	1720.34	1925.59	1668.75	3720.16	8873.72	4340.81	13944.8	3004.39	5159.83	6288.22	5965.4	4865.48
620	2074.25	1088.89	2512.73	2242.91	3709.1	8738.64	4336.73	15223.5	2932.62	5383.52	6058.49	5538.3	6132.62
920	2185.74	1287.22	3338.29	2477.12	4205.01	8684.32	4769.83	13683.2	3516.69	7599.08	5862.31	4534.28	4838.69
1220	2561.94	1698.31	3633.76	2404.78	4434.55	8503.67	4613.38	13080	2790.59	7676.01	6022.16	5921.75	6012.78
1520	1935.32	1570.16	3772.54	3514.88	5605.38	8529.29	5231.81	12783.5	3265.15	6909	5815.99	7626.79	7902.09
1820	2619.25	2380.06	4052.91	4462.03	4185.84	8223.98	4298.98	12697.8	2960.98	6961.94	6052.25	7767.93	5805.83
2120	3008.3	2181.31	4294.08	3397.67	4831.09	8476.84	4702.74	13481.4	2815.71	7395.16	5869.07	6295.13	6612.8
2420	2471.54	2272.62	4379.57	3033.68	4114.83	9304.46	4665.71	15240.5	2556.41	8602.18	5877	4719.17	6400.39
2720	2915.12	1856.27	4904.61	4019.68	4286.86	10152.9	4976.13	13077.9	3353.47	6965.19	5743.56	6296.11	6901.03
3020	3241.71	2061.03	5193.05	2288.04	3336.35	9253.11	4285.37	14545.2	2688.9	6612.42	5735.64	5820.44	5993.44
3320	3258.88	2031.88	5368.8	4352.74	3711	10178.8	4778.92	13023.7	2813.61	5694.22	5816.03	5676.32	7658.28
3620	3384.7	1164.07	5958.2	3109.72	3452.26	9185.4	4403.67	12347.7	2212.43	6927.12	5415.89	5096.71	6542.15
3920	3437.91	1350.96	5504.2	5706.6	3707.18	8864.57	4890.57	12856	3581.93	6299.87	5581.28	5920.3	6283.63
4220	2771.73	2082.75	5554.03	5480.15	3828.5	7810.94	5150.31	13495.4	2703.68	6129.06	5757.94	5425.75	6980.56
4520	2343.08	1645.72	5544.41	6027.49	3736.95	8406.44	5063.1	12350.9	2766.81	6174.21	5293.6	5644.49	6216.98
	AVERAGE OF PREBLEACH
	4707.36	4620.69	5852.33	5071.29	6560.94	8158.25	4881.29	13542.7	2716.24	5534.08	6276.1	5812.6	4960.27
NORMALIZED DATA
time	b1	b2	b3	b4	b5	c1	c2	c3	c4	c5	c6	c7	c8	Average of controls
120	1	1	1	1	1	1	1	1	1	1	1	1	1	1
130	0.204756	0.201759	0.209238	0.256894	0.325483	1.00432	1.02964	0.91753	0.924295	0.91074	0.995826	1.0021	1.16441	0.993608
160	0.212388	0.277022	0.271115	0.256767	0.385986	1.03026	0.990894	0.945368	1.05457	0.901663	0.969955	1.00891	1.25581	1.01968
190	0.224551	0.296466	0.261749	0.247031	0.495641	1.02222	0.952858	0.928054	1.06663	0.939542	1.02456	1.11455	1.15749	1.02574
220	0.252891	0.261163	0.310539	0.347866	0.574587	0.995831	0.915249	0.981126	1.09443	0.832209	1.01342	0.848906	1.06565	0.968353
250	0.267617	0.26996	0.322911	0.337496	0.576643	1.12479	0.926623	1.0452	1.10129	0.837821	1.01339	0.868172	1.01637	0.991708
280	0.308202	0.315331	0.3375	0.350086	0.588161	1.07959	0.969062	1.07861	1.11246	0.900881	1.02654	1.0619	1.0177	1.03084
310	0.296416	0.374456	0.348804	0.370107	0.609737	1.14048	0.920212	1.12468	1.17422	0.914765	1.01741	1.02475	1.03931	1.04448
320	0.287982	0.372312	0.32903	0.329058	0.567016	1.0877	0.889275	1.02969	1.10608	0.932374	1.00193	1.02629	0.980891	1.00678
620	0.44064	0.235655	0.429355	0.442277	0.565331	1.07114	0.888439	1.12411	1.07966	0.972796	0.965327	0.952809	1.23635	1.03633
920	0.464323	0.278578	0.57042	0.488459	0.640915	1.06448	0.977167	1.01038	1.29469	1.37314	0.93407	0.780077	0.975491	1.05119
1220	0.54424	0.367544	0.620909	0.474194	0.675902	1.04234	0.945115	0.965836	1.02737	1.38704	0.959539	1.01878	1.21219	1.06978
1520	0.411126	0.33981	0.644622	0.693093	0.854355	1.04548	1.07181	0.943938	1.20208	1.24845	0.92669	1.31211	1.59308	1.16795
1820	0.556417	0.515088	0.692529	0.879861	0.637994	1.00806	0.880706	0.937607	1.0901	1.25801	0.964334	1.3364	1.17047	1.08071
2120	0.639063	0.472074	0.733739	0.669981	0.736341	1.03905	0.963422	0.995476	1.03662	1.33629	0.935146	1.08301	1.33316	1.09027
2420	0.525038	0.491834	0.748347	0.598207	0.627171	1.1405	0.955836	1.12537	0.941157	1.5544	0.936411	0.811887	1.29033	1.09449
2720	0.619268	0.401729	0.838061	0.792635	0.653391	1.2445	1.01943	0.965674	1.2346	1.2586	0.915149	1.08318	1.39126	1.13905
3020	0.688647	0.446044	0.887347	0.451175	0.508516	1.1342	0.877918	1.07402	0.989935	1.19485	0.913887	1.00135	1.20829	1.04931
3320	0.692295	0.439735	0.917378	0.858309	0.56562	1.24767	0.979028	0.961677	1.03585	1.02894	0.926696	0.976555	1.54392	1.08754
3620	0.719023	0.251926	1.01809	0.613201	0.526183	1.1259	0.902153	0.911762	0.814521	1.25172	0.86294	0.876838	1.31891	1.00809
3920	0.730326	0.292372	0.940515	1.12527	0.565038	1.08658	1.0019	0.949296	1.31871	1.13838	0.889292	1.01853	1.26679	1.08368
4220	0.588807	0.450744	0.94903	1.08062	0.58353	0.957429	1.05511	0.99651	0.995376	1.10751	0.91744	0.933446	1.4073	1.04627
4520	0.497747	0.356163	0.947385	1.18855	0.569575	1.03042	1.03725	0.911997	1.01862	1.11567	0.843454	0.971079	1.25336	1.02273
CORRECTED DATA
Time	b1	b2	b3	b4	b5			Filter out due to large abrupt change or wrong targeting.
120	1	1	1	1	1
130	0.206073	0.203056	0.210584	0.258546	0.327577
160	0.208289	0.271676	0.265883	0.251812	0.378536
190	0.218916	0.289027	0.255181	0.240832	0.483204
220	0.261156	0.269698	0.320688	0.359235	0.593365
250	0.269855	0.272217	0.325611	0.340318	0.581465
280	0.298981	0.305896	0.327403	0.339612	0.570564
310	0.283793	0.358509	0.33395	0.354346	0.583772
320	0.286043	0.369805	0.326815	0.326842	0.563198
620	0.425192	0.227394	0.414304	0.426772	0.545512
920	0.441713	0.265013	0.542644	0.464674	0.609706
1220	0.508742	0.343571	0.58041	0.443264	0.631816
1520	0.352005	0.290944	0.551924	0.593424	0.731497
1820	0.514862	0.47662	0.640809	0.814151	0.590347
2120	0.58615	0.432987	0.672986	0.614508	0.675373
2420	0.479712	0.449375	0.683743	0.546564	0.573028
2720	0.543671	0.352688	0.735755	0.695874	0.573628
3020	0.656287	0.425084	0.84565	0.429974	0.484621
3320	0.636568	0.404338	0.843533	0.789219	0.52009
3620	0.71325	0.249903	1.00992	0.608277	0.521958
3920	0.673929	0.269794	0.867886	1.03838	0.521404
4220	0.562771	0.430812	0.907064	1.03284	0.557726
4520	0.486685	0.348247	0.926329	1.16213	0.556916
	Normalize the bouton fluorescent right after bleaching to 0
Recovery Time_(sec)	b1	b2	b3	b4	b5
0	0	0	0	0	0
30	0.0027919	0.0861028	0.0700505	-0.00908277	0.0757852
60	0.0161774	0.107875	0.0564942	-0.0238908	0.231443
90	0.0693807	0.0836219	0.139475	0.135799	0.395269
120	0.0803373	0.0867825	0.145711	0.110286	0.377572
150	0.117023	0.129043	0.147981	0.109334	0.361361
180	0.097894	0.195062	0.156276	0.129205	0.381002
190	0.100728	0.209235	0.147237	0.0921107	0.350406
480	0.275995	0.0305382	0.258064	0.226887	0.324105
780	0.296804	0.0777422	0.42064	0.278005	0.419571
1080	0.381231	0.176317	0.46848	0.249129	0.452452
1380	0.183811	0.110281	0.432395	0.451651	0.600693
1680	0.388939	0.343266	0.544992	0.749345	0.390781
1980	0.47873	0.288516	0.585753	0.480086	0.517229
2280	0.344665	0.309079	0.599378	0.388451	0.365025
2580	0.425226	0.187756	0.665265	0.589824	0.365917
2880	0.567073	0.278599	0.804476	0.231205	0.23355
3180	0.542235	0.252568	0.801794	0.71572	0.286298
3480	0.638821	0.0587834	1.01256	0.471683	0.289077
3780	0.589294	0.0837421	0.832644	1.05176	0.288252
4080	0.449283	0.285786	0.882272	1.04429	0.342269
4380	0.353448	0.182184	0.906677	1.21867	0.341064

## Sheet: WT 9nov F1
time	b1	b2	b3	b4	b5	background	c1	c2	c3	c4	c5	c6	c7	c8
0	5835.36	8763.23	5117.78	3447.24	4919.64	86.202	6174.25	9469.57	10216.2	8721.74	9550.09	10752.8	11946.6	8856.06
30	5807.09	9128.72	5389.92	3352.81	4451.75	114.473	6280.22	9107.81	10059.8	8446.77	9404.16	10532.4	11926.1	8980.11
60	5643.51	8980.23	5488.58	3310.07	4205.15	105.987	6292.1	9189.47	9376.65	8410.05	9375.92	10674.1	12715.1	9043.51
90	5579.42	9098.65	5414.86	3375.3	5428.01	103.533	6453.81	9376.77	10021.7	8677.05	8983.56	10629	12693.9	8526.88
120	5950.55	9133.48	5240.83	3408.47	4311.21	130	6172.93	8321.84	9638.31	8825.53	9507.6	10613.4	12134.5	8680.76
130	1074.3	2823.7	545.117	196.865	600.824	119.981	6249.78	8245.61	9731.39	8534.76	9439.78	10572.7	12863.1	8281.15
160	1385.39	3376.51	699.087	219.687	801.702	137.642	6165.96	8489.37	9436.32	8424.16	9577.35	10531.7	12730.3	8597.13
190	1502.15	3479.89	766.329	222.471	868.616	124.615	6066.68	8815.91	9698.48	8253.07	9410.81	10508.5	12979.3	8506.64
220	1464.48	3646.35	795.543	207.199	903.697	92.156	6533.58	9330.62	9862.23	8315.41	9695.02	10255.7	13208.3	8542.55
250	1519.85	3585.19	943.521	216.287	858.342	103.759	6206.8	8858.32	9647.21	8353.8	9246.24	10100.3	12419.9	8758.58
280	1711.23	3585.86	962.667	219.179	937.649	93.483	6585.43	9401.54	9237.32	8289.25	9462.57	10501.1	12738.2	8902.05
310	1988.89	3656.95	868.505	243.203	1004.35	100.883	6448.19	9130.62	8969.59	8232.75	9539.71	10087.6	13223.2	8877.03
320	1956.65	3596.94	842.653	219.745	962.864	113.975	6602.49	9056.15	9378.86	8311.61	9142.61	10289	12567.1	8231.11
620	2008.4	4814.36	831.259	249.689	1344.89	81.436	6575.08	9094.31	8862.93	7683.51	9031.5	10570.2	12415.3	8936.75
920	2129.36	5350.28	797.886	209.786	1334.28	87.268	6261.82	9127.97	9325.39	7932.94	9681.2	9893.66	12223.4	8661.8
1220	2120.03	6736.59	789.336	254.974	1485.45	107.227	6422.18	9034.15	11026	8106	9864.8	9330.84	13864.9	8866.1
1520	1903.61	6880.66	930.402	232.81	1917.29	121.157	6463.85	9039.12	9703.87	7622.73	10139.7	10410.5	12633.9	9821.67
1820	2331.99	5408.52	815.159	232.495	2723.74	146.523	6618.53	8898.17	8247.5	8382.99	10202.7	10906.6	12648	8637.03
2120	2611.31	6702.75	1089.98	231.378	1831.7	107.684	6413.6	10338.7	9330	7946.31	9774.21	9968.78	12878.3	8413.62
2420	2414.38	7254.61	896.494	220.154	3012.28	100.878	6749.85	9152.17	10000	8689.42	10415.5	10690.2	12839.6	8832.86
2720	2545.95	7151.38	1017.23	216.327	2915.76	99.877	7305.31	9694.93	9079.86	8356.24	9741.29	10027.7	13151.2	8508.44
3020	2580.26	6491.14	990.252	228.183	2589.7	99.532	6886.2	9811.35	9642.15	8760.27	10000.3	9607.65	12744.5	7904.13
3320	2903.86	6294.84	901.759	207.93	3530.57	95.603	5636.17	9715.99	9602.07	8802.27	9300.2	9269.34	12235.3	7637.02
3620	2794.73	5887.68	825.132	194.071	2610.34	100.639	5955.49	9108.37	8794.16	8340.84	8802.21	8712.03	12632.2	7709.91
3920	2688.94	6885.73	832.357	264.788	2921.55	76.781	5391.59	8334.85	8355.85	7482.36	8759.02	9733.68	11733.2	7699.77
4220	2978.53	6867.08	891.873	207.951	2392.77	114.65	5629.15	8588.32	8594.65	8164.32	8041.2	8992.66	11256.5	7311.85
4520	3967.47	6434.01	1057.89	218.243	2616.09	117.712	5225.98	9274.19	8873.06	9390.27	9006.61	9698.47	11762.8	7943.98
time
0	5749.16	8677.03	5031.58	3361.04	4833.43	6088.05	9383.37	10130	8635.54	9463.89	10666.6	11860.4	8769.86
30	5692.62	9014.25	5275.44	3238.34	4337.28	6165.75	8993.34	9945.29	8332.3	9289.69	10417.9	11811.6	8865.63
60	5537.52	8874.24	5382.59	3204.09	4099.16	6186.11	9083.48	9270.66	8304.06	9269.93	10568.1	12609.1	8937.52
90	5475.89	8995.11	5311.32	3271.76	5324.47	6350.28	9273.24	9918.21	8573.52	8880.03	10525.5	12590.3	8423.35
120	5820.55	9003.48	5110.83	3278.47	4181.21	6042.93	8191.84	9508.31	8695.53	9377.6	10483.4	12004.5	8550.76
130	954.322	2703.71	425.136	76.884	480.843	6129.8	8125.63	9611.41	8414.78	9319.8	10452.7	12743.2	8161.17
160	1247.75	3238.87	561.445	82.045	664.06	6028.32	8351.73	9298.68	8286.52	9439.71	10394	12592.7	8459.49
190	1377.53	3355.28	641.714	97.856	744.001	5942.06	8691.3	9573.87	8128.46	9286.19	10383.9	12854.7	8382.02
220	1372.32	3554.19	703.387	115.043	811.541	6441.42	9238.46	9770.08	8223.25	9602.86	10163.5	13116.1	8450.39
250	1416.09	3481.43	839.762	112.528	754.583	6103.04	8754.56	9543.45	8250.04	9142.48	9996.57	12316.2	8654.82
280	1617.74	3492.38	869.184	125.696	844.166	6491.95	9308.06	9143.83	8195.77	9369.09	10407.6	12644.7	8808.57
310	1888	3556.07	767.622	142.32	903.467	6347.31	9029.73	8868.7	8131.87	9438.83	9986.76	13122.3	8776.14
320	1842.67	3482.96	728.678	105.77	848.889	6488.51	8942.17	9264.88	8197.64	9028.64	10175	12453.2	8117.14
620	1926.96	4732.93	749.823	168.253	1263.45	6493.64	9012.87	8781.49	7602.08	8950.06	10488.8	12333.9	8855.32
920	2042.09	5263.02	710.618	122.518	1247.01	6174.55	9040.7	9238.12	7845.68	9593.93	9806.39	12136.1	8574.53
1220	2012.8	6629.37	682.109	147.747	1378.22	6314.95	8926.92	10918.8	7998.78	9757.57	9223.61	13757.7	8758.87
1520	1782.45	6759.5	809.245	111.653	1796.13	6342.69	8917.96	9582.72	7501.57	10018.6	10289.3	12512.8	9700.51
1820	2185.47	5261.99	668.636	85.972	2577.22	6472.01	8751.65	8100.98	8236.46	10056.2	10760.1	12501.5	8490.5
2120	2503.63	6595.06	982.297	123.694	1724.02	6305.91	10231	9222.31	7838.63	9666.53	9861.1	12770.6	8305.94
2420	2313.5	7153.73	795.616	119.276	2911.41	6648.98	9051.29	9899.12	8588.54	10314.7	10589.3	12738.7	8731.98
2720	2446.07	7051.5	917.357	116.45	2815.89	7205.43	9595.05	8979.99	8256.37	9641.41	9927.82	13051.3	8408.57
3020	2480.73	6391.61	890.72	128.651	2490.17	6786.67	9711.82	9542.62	8660.73	9900.74	9508.12	12645	7804.6
3320	2808.26	6199.23	806.156	112.327	3434.97	5540.57	9620.39	9506.47	8706.67	9204.6	9173.73	12139.7	7541.42
3620	2694.09	5787.04	724.493	93.432	2509.7	5854.85	9007.73	8693.52	8240.2	8701.57	8611.4	12531.6	7609.27
3920	2612.16	6808.95	755.576	188.007	2844.77	5314.81	8258.07	8279.07	7405.58	8682.24	9656.9	11656.5	7622.99
4220	2863.88	6752.43	777.223	93.301	2278.12	5514.5	8473.67	8480	8049.67	7926.55	8878.01	11141.9	7197.2
4520	3849.75	6316.29	940.183	100.531	2498.38	5108.27	9156.48	8755.35	9272.56	8888.9	9580.76	11645.1	7826.27
	AVERAGE OF PREBLEACH
	5655.15	8912.82	5222.35	3270.74	4555.11	6166.63	8985.05	9754.49	8508.19	9256.23	10532.3	12175.2	8709.43
NORMALIZED DATA
time	b1	b2	b3	b4	b5	c1	c2	c3	c4	c5	c6	c7	c8	Average of controls
120	1	1	1	1	1	1	1	1	1	1	1	1	1	1
130	0.168753	0.303351	0.081407	0.0235066	0.105561	0.994028	0.90435	0.985331	0.989021	1.00687	0.992444	1.04665	0.93705	0.981968
160	0.22064	0.363394	0.107508	0.0250845	0.145783	0.977572	0.929513	0.953272	0.973946	1.01982	0.986871	1.03429	0.971303	0.980823
190	0.243589	0.376455	0.122878	0.0299186	0.163333	0.963584	0.967306	0.981483	0.955369	1.00324	0.985914	1.05581	0.962408	0.984389
220	0.242668	0.398773	0.134688	0.0351734	0.17816	1.04456	1.0282	1.0016	0.96651	1.03745	0.964989	1.07728	0.970258	1.01136
250	0.250407	0.39061	0.160801	0.0344045	0.165656	0.989689	0.974347	0.978364	0.969658	0.987711	0.949135	1.01158	0.993731	0.981777
280	0.286066	0.391838	0.166435	0.0384305	0.185323	1.05276	1.03595	0.937397	0.96328	1.01219	0.988163	1.03857	1.01138	1.00496
310	0.333856	0.398984	0.146988	0.0435131	0.198341	1.0293	1.00497	0.909192	0.955769	1.01973	0.948205	1.07779	1.00766	0.994077
320	0.32584	0.390781	0.139531	0.0323383	0.18636	1.0522	0.995227	0.949807	0.9635	0.975412	0.966076	1.02283	0.931995	0.982131
620	0.340745	0.531025	0.14358	0.0514419	0.27737	1.05303	1.0031	0.900251	0.893501	0.966923	0.995869	1.01303	1.01675	0.980307
920	0.361103	0.590499	0.136072	0.0374588	0.27376	1.00129	1.00619	0.947064	0.922132	1.03648	0.931079	0.996792	0.984511	0.978193
1220	0.355924	0.743801	0.130613	0.0451724	0.302566	1.02405	0.99353	1.11936	0.940127	1.05416	0.875746	1.12998	1.00568	1.01783
1520	0.315191	0.758402	0.154958	0.0341369	0.394311	1.02855	0.992533	0.98239	0.881689	1.08236	0.976933	1.02773	1.11379	1.01075
1820	0.386457	0.590385	0.128033	0.0262852	0.565786	1.04952	0.974023	0.830487	0.968063	1.08643	1.02163	1.0268	0.974864	0.991476
2120	0.442716	0.739952	0.188095	0.0378184	0.37848	1.02259	1.13867	0.945443	0.921304	1.04433	0.936273	1.04891	0.953672	1.0014
2420	0.409097	0.802633	0.152348	0.0364676	0.639151	1.07822	1.00737	1.01483	1.00944	1.11435	1.00542	1.04629	1.00259	1.03481
2720	0.432539	0.791163	0.17566	0.0356036	0.618182	1.16846	1.06789	0.9206	0.970402	1.04161	0.942608	1.07196	0.965456	1.01862
3020	0.438667	0.717125	0.170559	0.0393339	0.546675	1.10055	1.08089	0.978279	1.01793	1.06963	0.902759	1.03859	0.896109	1.01059
3320	0.496585	0.695541	0.154366	0.034343	0.754091	0.898476	1.07071	0.974573	1.02333	0.994422	0.87101	0.997084	0.865891	0.961937
3620	0.476396	0.649294	0.138729	0.028566	0.550963	0.949442	1.00252	0.891233	0.968502	0.940077	0.817619	1.02927	0.873683	0.934044
3920	0.461908	0.76395	0.144681	0.0574815	0.624523	0.861867	0.919089	0.848744	0.870407	0.937988	0.916885	0.957394	0.875258	0.898454
4220	0.506421	0.757609	0.148826	0.028526	0.500124	0.894248	0.943085	0.869344	0.946108	0.856348	0.842933	0.91513	0.826369	0.886696
4520	0.680752	0.708675	0.180031	0.0307365	0.548477	0.828374	1.01908	0.897571	1.08984	0.960315	0.909656	0.95646	0.898597	0.944986
CORRECTED DATA
Time	b1	b2	b3	b4	b5			Filter out due to large abrupt change or wrong targeting.
120	1	1	1	1	1
130	0.171852	0.308922	0.0829019	0.0239383	0.1075
160	0.224954	0.370499	0.10961	0.025575	0.148634
190	0.247452	0.382425	0.124827	0.0303931	0.165923
220	0.239943	0.394295	0.133175	0.0347784	0.17616
250	0.255055	0.39786	0.163786	0.035043	0.168731
280	0.284654	0.389904	0.165614	0.0382407	0.184408
310	0.335845	0.401361	0.147864	0.0437724	0.199523
320	0.331769	0.397891	0.142069	0.0329266	0.18975
620	0.34759	0.541692	0.146464	0.0524753	0.282942
920	0.369154	0.603664	0.139106	0.0382939	0.279863
1220	0.349689	0.730772	0.128325	0.0443811	0.297266
1520	0.311839	0.750338	0.15331	0.0337739	0.390119
1820	0.38978	0.59546	0.129134	0.0265112	0.57065
2120	0.442099	0.738919	0.187832	0.0377656	0.377951
2420	0.395334	0.775631	0.147223	0.0352408	0.617649
2720	0.424631	0.776699	0.172448	0.0349526	0.60688
3020	0.43407	0.709609	0.168772	0.0389217	0.540946
3320	0.516234	0.723063	0.160475	0.0357019	0.783929
3620	0.510036	0.695143	0.148525	0.0305832	0.589869
3920	0.514114	0.850294	0.161033	0.0639782	0.695108
4220	0.571133	0.854418	0.167844	0.0321711	0.564031
4520	0.720383	0.749931	0.190511	0.0325258	0.580407
	Normalize the bouton fluorescent right after bleaching to 0
Recovery Time_(sec)	b1	b2	b3	b4	b5
0	0	0	0	0	0
30	0.0641214	0.0891033	0.0291224	0.00167685	0.0460886
60	0.0912885	0.106361	0.0457149	0.00661311	0.0654607
90	0.0822215	0.123537	0.054818	0.011106	0.0769303
120	0.100469	0.128695	0.0881959	0.0113771	0.0686067
150	0.13621	0.117182	0.0901887	0.0146533	0.0861717
180	0.198024	0.133761	0.070834	0.0203205	0.103108
190	0.193102	0.12874	0.0645159	0.0092088	0.0921576
480	0.212206	0.336823	0.0693078	0.0292369	0.196574
780	0.238245	0.426496	0.0612847	0.0147077	0.193125
1080	0.214741	0.610423	0.0495296	0.0209442	0.212623
1380	0.169037	0.638735	0.076773	0.0100769	0.31666
1680	0.263151	0.414625	0.0504115	0.00263599	0.518936
1980	0.326327	0.622213	0.114416	0.0141664	0.303027
2280	0.269858	0.675335	0.0701354	0.0115797	0.571596
2580	0.305235	0.67688	0.0976409	0.0112845	0.559529
2880	0.316632	0.579801	0.093632	0.0153509	0.485654
3180	0.415846	0.599268	0.084585	0.0120522	0.757904
3480	0.408362	0.558868	0.0715556	0.00680786	0.540469
3780	0.413286	0.783373	0.0851943	0.0410219	0.658385
4080	0.482137	0.789341	0.0926201	0.00843473	0.511519
4380	0.662359	0.638147	0.117337	0.00879818	0.529868

## Sheet: WT 25Nov F2
time	b1	b2	b3	b4	b5	background	c1	c2	c3	c4	c5	c6	c7	c8
0	7007.84	3484.88	2893.82	2627.99	5101.98	8.602	3186.28	6225.1	3493.07	5933.46	2529.28	4098.46	5003.67	2313.01
30	7024.55	3634.94	3011.15	2689.53	4847.57	8.076	3343.46	6218.26	3413.32	5213.89	2467.07	4131.66	4698.33	2489.98
60	7271.02	3588.12	3009.3	2816.41	5008.49	12.073	3264.46	6480.89	3467.61	5567.97	2513.51	4237.71	4907.3	2539.39
90	7127.78	3586.01	3051.93	2722.07	4993.84	10.019	3247.96	6871.34	3483.24	5340.22	2560.03	4333.97	5224.9	2189.83
120	7205.82	3640.54	2809.62	2869.98	5370.33	9.523	3257.67	7413.58	3381.26	5404.76	2687.18	4300.21	5139.9	2454.36
130	2099.86	1415.96	1009.36	974.479	2686.64	9.752	3251	7240.99	3408.33	5417.65	3068.08	4344.8	5195.15	2393.75
160	2426.42	1617.73	1266.54	1091.2	2882.93	8.423	3194.16	7881.93	3536.42	5517.27	3182.15	4555.49	5213.49	2375.39
190	2335.85	1526.42	1468.64	1119.14	2816.02	12.042	3292.03	7522.56	3415.19	5499.37	3460.09	4401.32	5136.88	2561.09
220	2747.62	1661.28	1554.96	1119.51	3106.53	9.578	3225.17	7739.92	3454.51	5248.96	2940.23	4477.56	5000.23	2428.57
250	3124.25	1705.24	1602.47	1191.25	3209.24	8.943	3231.8	7501.83	3421.97	5449.22	2574.22	4220.25	5063.33	2319.86
280	3004.96	1672.47	1510.05	1301.74	3238.33	7.746	3356.35	7370.3	3680.92	5053.84	2654.3	4581.26	5210.37	2450.58
310	2815.96	1527.3	2065.21	1269.35	3349.13	8.907	3422.09	7392.74	3354.31	5107.37	3051.59	4345.84	5000.48	2221.69
320	2894.37	1582.64	1688.29	1241.88	3376.15	9.475	3564.15	7094.68	3452.65	4924.26	2949.2	4302.12	4905.72	2242.04
620	3548.1	2003.16	1673.46	1424.7	3269.99	9.943	3572.26	6837.69	3707.7	5223.98	2828.85	4200.91	4567.99	2182.08
920	2853.25	2116.57	1951.84	1360.03	3056.18	8.782	3513.11	5636.06	3552.32	5027.65	2871.15	4169.95	4511.1	2158.34
1220	3069.73	2011.1	1907.45	1585.4	2887.67	9.321	3435.25	5908.83	3855.12	5135.16	2640.14	4303.77	4858.86	1981.94
1520	2346.5	2489.68	2004.73	1642.27	2575.37	8.159	3564.91	5858.66	3690.74	5698.22	2189.51	4430.46	4555.76	2169.74
1820	2744.97	2419.53	1640.57	1853.49	2939.97	8.356	3880.74	6458.78	3871.38	6178.37	2587.69	4582.78	4617.31	2638.76
2120	2936.86	2841.39	2108.68	2329.48	3890.62	7.407	3796.49	7121.1	4743.52	6109.33	2742.68	4714.39	4649.52	2364.32
2420	2733.22	2740.25	2067.52	2108.07	3341.28	12.091	3783.83	7011.71	4121.5	6179	2889.13	4654.59	5433.1	2446.22
2720	2333.58	2038.61	2078.59	2551.07	3022.62	6.636	3913.39	6885.45	4088.83	6745.67	2657.63	4767.82	4498.49	2592.33
3020	3455.61	2339.03	1987.79	2058.44	3541.32	6.154	3795.56	7095.63	3906.02	6010.38	2824.64	4696.16	4580.1	2856.54
3320	3060.09	1967.58	2349.4	2187.41	3813.1	7.656	3875.44	7317.3	3444.65	5789.81	2845.4	5268.4	4236.82	2847.72
3620	3423.54	1710.73	2176.43	2155.66	3837.72	10.342	3868.84	7427.24	3972.25	6020.16	2688.88	3901.1	4050.07	2595.25
3920	3501.91	2753.76	2166.32	2329.82	3672.63	7.075	3772.21	7624.36	3382.91	5978.99	2561.27	4093.82	4540.09	2328.09
4220	3793.22	3528.45	2116.03	2290.63	3647.83	10.117	3599.34	7476.76	3789.87	5581.92	2662.51	3967.09	4599.99	2638.96
4520	4098.85	3192.05	2147.24	2710.01	4283.36	10.83	3557.74	7278.33	3902.96	5644.27	2832.21	4254.49	4713.21	2227.32
time
0	6999.24	3476.28	2885.22	2619.39	5093.38	3177.68	6216.5	3484.47	5924.86	2520.68	4089.86	4995.07	2304.41
30	7016.47	3626.86	3003.07	2681.45	4839.5	3335.39	6210.19	3405.24	5205.81	2459	4123.59	4690.26	2481.91
60	7258.94	3576.04	2997.23	2804.34	4996.42	3252.39	6468.82	3455.54	5555.9	2501.43	4225.64	4895.23	2527.32
90	7117.76	3576	3041.91	2712.05	4983.82	3237.94	6861.32	3473.22	5330.2	2550.01	4323.95	5214.88	2179.81
120	7196.29	3631.01	2800.1	2860.46	5360.81	3248.15	7404.06	3371.73	5395.24	2677.66	4290.69	5130.38	2444.83
130	2090.11	1406.21	999.608	964.727	2676.88	3241.25	7231.24	3398.58	5407.9	3058.33	4335.05	5185.4	2384
160	2418	1609.31	1258.11	1082.78	2874.51	3185.74	7873.5	3528	5508.85	3173.72	4547.06	5205.07	2366.97
190	2323.81	1514.38	1456.6	1107.09	2803.98	3279.99	7510.52	3403.14	5487.33	3448.05	4389.28	5124.84	2549.04
220	2738.05	1651.71	1545.38	1109.93	3096.95	3215.59	7730.34	3444.94	5239.38	2930.66	4467.98	4990.65	2418.99
250	3115.3	1696.3	1593.53	1182.31	3200.29	3222.85	7492.89	3413.02	5440.28	2565.27	4211.31	5054.38	2310.91
280	2997.22	1664.73	1502.3	1293.99	3230.59	3348.61	7362.55	3673.17	5046.09	2646.56	4573.51	5202.62	2442.84
310	2807.06	1518.4	2056.3	1260.44	3340.23	3413.18	7383.83	3345.4	5098.46	3042.69	4336.93	4991.57	2212.78
320	2884.89	1573.16	1678.81	1232.4	3366.68	3554.67	7085.21	3443.17	4914.78	2939.73	4292.64	4896.25	2232.56
620	3538.16	1993.21	1663.52	1414.76	3260.04	3562.32	6827.74	3697.76	5214.03	2818.9	4190.97	4558.05	2172.14
920	2844.47	2107.79	1943.06	1351.25	3047.39	3504.33	5627.28	3543.53	5018.87	2862.37	4161.17	4502.32	2149.56
1220	3060.41	2001.78	1898.13	1576.08	2878.35	3425.93	5899.51	3845.8	5125.84	2630.82	4294.45	4849.54	1972.62
1520	2338.34	2481.53	1996.57	1634.11	2567.21	3556.75	5850.5	3682.58	5690.06	2181.35	4422.3	4547.6	2161.58
1820	2736.62	2411.18	1632.22	1845.14	2931.61	3872.39	6450.42	3863.03	6170.02	2579.33	4574.43	4608.96	2630.4
2120	2929.46	2833.98	2101.27	2322.07	3883.22	3789.08	7113.7	4736.11	6101.93	2735.28	4706.98	4642.11	2356.91
2420	2721.13	2728.16	2055.43	2095.98	3329.18	3771.74	6999.62	4109.41	6166.91	2877.04	4642.5	5421.01	2434.13
2720	2326.95	2031.98	2071.96	2544.44	3015.98	3906.75	6878.82	4082.19	6739.03	2650.99	4761.19	4491.86	2585.69
3020	3449.45	2332.88	1981.63	2052.28	3535.16	3789.41	7089.48	3899.87	6004.22	2818.48	4690.01	4573.95	2850.39
3320	3052.44	1959.92	2341.74	2179.76	3805.45	3867.78	7309.65	3436.99	5782.15	2837.74	5260.74	4229.16	2840.06
3620	3413.19	1700.39	2166.09	2145.32	3827.38	3858.5	7416.9	3961.91	6009.82	2678.54	3890.76	4039.73	2584.91
3920	3494.83	2746.69	2159.24	2322.75	3665.56	3765.13	7617.28	3375.84	5971.91	2554.2	4086.75	4533.02	2321.01
4220	3783.1	3518.34	2105.91	2280.51	3637.72	3589.22	7466.65	3779.75	5571.8	2652.39	3956.97	4589.87	2628.84
4520	4088.02	3181.22	2136.41	2699.18	4272.53	3546.91	7267.5	3892.13	5633.44	2821.38	4243.66	4702.38	2216.49
	AVERAGE OF PREBLEACH
	7117.74	3577.24	2945.51	2735.54	5054.78	3250.31	6632.18	3438.04	5482.4	2541.75	4210.74	4985.16	2387.66
NORMALIZED DATA
time	b1	b2	b3	b4	b5	c1	c2	c3	c4	c5	c6	c7	c8	Average of controls
120	1	1	1	1	1	1	1	1	1	1	1	1	1	1
130	0.293648	0.393099	0.339367	0.352664	0.529574	0.997212	1.09033	0.988523	0.986411	1.20324	1.02952	1.04017	0.998468	1.04173
160	0.339714	0.449874	0.42713	0.395819	0.568671	0.980134	1.18717	1.02617	1.00482	1.24864	1.07987	1.04411	0.991336	1.07028
190	0.326482	0.423336	0.494515	0.404708	0.554718	1.00913	1.13244	0.98985	1.0009	1.35656	1.0424	1.02802	1.06759	1.07836
220	0.384679	0.461727	0.524657	0.405745	0.612677	0.989319	1.16558	1.00201	0.955672	1.153	1.06109	1.0011	1.01312	1.04261
250	0.437682	0.474191	0.541003	0.432203	0.633122	0.991553	1.12978	0.992724	0.992317	1.00925	1.00013	1.01389	0.967858	1.01219
280	0.421091	0.465367	0.510033	0.47303	0.639115	1.03024	1.11013	1.06839	0.920417	1.04123	1.08615	1.04362	1.02311	1.04041
310	0.394375	0.424461	0.698114	0.460765	0.660805	1.05011	1.11333	0.973054	0.929969	1.19708	1.02997	1.00128	0.926759	1.0277
320	0.40531	0.43977	0.569956	0.450515	0.666038	1.09364	1.06831	1.00149	0.896465	1.15657	1.01945	0.982164	0.935044	1.01914
620	0.49709	0.557193	0.564764	0.517178	0.644942	1.09599	1.02949	1.07554	0.951049	1.10904	0.995303	0.914323	0.909736	1.01006
920	0.399631	0.589223	0.659669	0.49396	0.602873	1.07815	0.848481	1.03068	0.915451	1.12614	0.988227	0.903144	0.90028	0.97382
1220	0.429969	0.559588	0.644415	0.576148	0.569431	1.05403	0.889529	1.1186	0.934962	1.03504	1.01988	0.972795	0.826173	0.981377
1520	0.328523	0.693698	0.677836	0.597364	0.507877	1.09428	0.882139	1.07113	1.03788	0.858207	1.05024	0.912227	0.905316	0.976427
1820	0.384478	0.674033	0.554138	0.674506	0.579967	1.19139	0.972595	1.12361	1.12542	1.01479	1.08637	0.924535	1.10167	1.06755
2120	0.411571	0.792225	0.713381	0.848854	0.768226	1.16576	1.0726	1.37756	1.113	1.07614	1.11785	0.931186	0.987125	1.10515
2420	0.382303	0.762645	0.697819	0.766202	0.658621	1.16043	1.0554	1.19528	1.12486	1.13191	1.10254	1.08743	1.01946	1.10966
2720	0.326922	0.568029	0.703429	0.930142	0.596659	1.20196	1.03719	1.18736	1.22921	1.04298	1.13072	0.901045	1.08294	1.10168
3020	0.484627	0.652145	0.672764	0.75023	0.69937	1.16586	1.06895	1.13433	1.09518	1.10887	1.11382	0.917512	1.1938	1.09979
3320	0.428849	0.547887	0.795021	0.796829	0.75284	1.18997	1.10215	0.999696	1.05468	1.11645	1.24936	0.84835	1.18948	1.09377
3620	0.479533	0.475337	0.735387	0.784239	0.757179	1.18712	1.11832	1.15237	1.0962	1.05381	0.924007	0.81035	1.08261	1.0531
3920	0.491003	0.767823	0.733063	0.8491	0.725166	1.15839	1.14853	0.981907	1.08929	1.0049	0.970553	0.909302	0.972087	1.02937
4220	0.531503	0.983535	0.714957	0.833661	0.719658	1.10427	1.12582	1.09939	1.01631	1.04353	0.939732	0.920706	1.10101	1.04385
4520	0.574342	0.889296	0.725312	0.98671	0.845244	1.09125	1.09579	1.13208	1.02755	1.11001	1.00782	0.943275	0.92831	1.04201
CORRECTED DATA
Time	b1	b2	b3	b4	b5			Filter out due to large abrupt change or wrong targeting.
120	1	1	1	1	1
130	0.281884	0.377351	0.325772	0.338536	0.508359
160	0.317407	0.420333	0.399082	0.369827	0.531329
190	0.302757	0.392574	0.45858	0.375299	0.514408
220	0.368957	0.442856	0.503214	0.389162	0.587636
250	0.432412	0.468482	0.534488	0.426999	0.625498
280	0.404735	0.447291	0.490222	0.454656	0.61429
310	0.383747	0.413022	0.679301	0.448348	0.642997
320	0.397697	0.43151	0.559251	0.442053	0.653528
620	0.492139	0.551644	0.55914	0.512027	0.638519
920	0.410374	0.605064	0.677403	0.50724	0.619081
1220	0.438128	0.570207	0.656644	0.587082	0.580237
1520	0.336454	0.710446	0.694201	0.611786	0.520138
1820	0.360151	0.631385	0.519075	0.631828	0.543271
2120	0.372411	0.716846	0.645505	0.768088	0.695131
2420	0.344522	0.687276	0.628857	0.690482	0.593532
2720	0.29675	0.515604	0.638508	0.844297	0.541592
3020	0.440654	0.592971	0.61172	0.682157	0.635911
3320	0.392085	0.500918	0.726866	0.728518	0.688301
3620	0.455354	0.451369	0.698307	0.744695	0.719
3920	0.476994	0.745915	0.712147	0.824873	0.704476
4220	0.509177	0.942222	0.684926	0.798644	0.689429
4520	0.551186	0.853442	0.69607	0.946928	0.811166
	Normalize the bouton fluorescent right after bleaching to 0
Recovery Time_(sec)	b1	b2	b3	b4	b5
0	0	0	0	0	0
30	0.0494662	0.0690309	0.108732	0.0473056	0.0467221
60	0.0290664	0.0244487	0.196978	0.0555778	0.0123048
90	0.121252	0.105203	0.263178	0.0765363	0.16125
120	0.209615	0.14636	0.309564	0.133738	0.238262
150	0.171074	0.112327	0.243909	0.17555	0.215465
180	0.141847	0.0572894	0.524346	0.166014	0.273855
190	0.161273	0.0869816	0.346291	0.156496	0.295274
480	0.292787	0.279922	0.346126	0.262284	0.264746
780	0.178927	0.365716	0.521532	0.255045	0.225209
1080	0.217575	0.309735	0.490742	0.375751	0.146201
1380	0.0759904	0.534964	0.546446	0.413099	0.0239586
1680	0.10899	0.407989	0.286704	0.443398	0.0710109
1980	0.126061	0.545244	0.474221	0.649395	0.379895
2280	0.0872252	0.497753	0.449529	0.532071	0.173243
2580	0.0207007	0.222041	0.463844	0.764608	0.0675957
2880	0.221092	0.346295	0.424112	0.519485	0.259442
3180	0.153458	0.198453	0.594893	0.589574	0.366003
3480	0.241563	0.118876	0.552536	0.614031	0.428445
3780	0.271697	0.591929	0.573063	0.735244	0.398903
4080	0.316513	0.907206	0.532689	0.69559	0.368298
4380	0.375012	0.764621	0.549217	0.919767	0.61591

## Sheet: WT 26nov F3
time	b1	b2	b3	b4	b5	background	c1	c2	c3	c4	c5	c6	c7	c8
0	9496.97	6071.91	5552.13	4107.87	11205.5	14.336	7555.83	5346.91	4181.2	7834.83	7322.39	16146.5	7394.08	3663.46
30	9375.5	5957.68	5326.17	3979.58	11493.5	15.355	7318.83	5010.71	4045.05	8346.82	7207.22	16707.7	7201.39	3513.48
60	9295.27	6101.14	5771	4022.62	10881.9	13.641	7175.02	4956.45	4064.35	7987.54	7555.75	16418.2	7348.22	3573.15
90	9298.72	5670.1	5444.07	4019.52	11005.5	16.944	7190.62	4790.61	4005.91	8136.26	7368.96	16256.9	7529.94	3528.04
120	9317.83	5661.82	5560.38	3940.41	10497.8	11.107	7648.18	5088.01	4019.8	8120.58	7397.45	16209.5	7750.61	3514.86
130	1794.87	1452.05	1496.14	780.722	2953.15	11.67	7252.92	4741.21	4038.38	7697.61	7339.13	16528.8	7505.67	3496.97
160	1954.45	1786.58	2127.4	1035.6	3514.24	14.435	7103.32	4787.89	4170.32	7975.51	7333.54	16515.5	7359.06	3589.74
190	1969.16	1909.57	2408.89	1105.7	3645.68	17.202	7134.76	4964.52	4186.72	7738.4	7507.11	16643.1	8043.61	3365.25
220	1959.25	1879.57	1937.08	1078.07	3964.7	15.257	7122.14	4921.85	4272.85	8032.26	7251.72	15875.4	7613.58	3463.11
250	2022.96	1974.3	1992.39	1131.78	4079.82	16.91	7232	5086.39	4204.59	8013.06	7507.08	16112.4	7959.89	3496.86
280	2000.61	2013.87	2673.49	1217.58	4022.33	11.501	7408.38	5042.08	4138.6	7977.68	7188.04	15416	7854.76	3537.41
310	2079.62	2052.04	2660.93	1408.89	4208.44	22.977	7308.48	4724.39	3944.26	8009.01	7120.68	15504.8	6829.3	3466.16
320	2021.76	2095.93	2769.9	1431.57	4247.44	16.029	7251.9	4887.37	4051.88	7799.4	7034.55	15313.3	7033.27	3499.71
620	2072.76	2413.3	2869.76	1818.66	5902.14	16.493	7023.11	4865.6	3701.77	8044.91	6910.33	14756.6	7214.27	3690.16
920	2099.42	2757.71	2965.93	1661.36	6070.59	15.963	6730.57	4998.77	3916.61	8100.09	6971.19	14935.3	7412.06	3425.82
1220	2028.58	3246.49	3999.93	1639.58	6506.5	12.517	6624.23	5199.85	3716.21	7950.17	6828.95	13428.3	6484.8	3602.63
1520	1952.57	2968.99	4198.67	1911.1	7350.68	12.429	7230.62	5083.44	3804.23	7649.83	6900.98	12853.7	6243.78	3465.8
1820	2012.94	3732.31	4831.25	1518.86	7753.31	10.348	7187.42	5675.32	3748.4	7669.41	6633.26	14083.2	6208.36	3560.9
2120	2017.98	4180.79	4603.55	1702.88	8878.72	13.504	7386.76	5300.01	3741.15	8301.33	6655.07	13712.3	7035.2	3730.19
2420	1940.91	4126.96	5048.43	2149.99	8053.94	14.746	6858.24	5348.93	3634.93	8090.59	6315.88	13348	6858.55	3763.23
2720	2057.79	3876.88	5593.63	2199.33	7921.38	12.571	6917.7	5588.03	3566.47	7876.08	6223.91	14258	6856.03	3460.86
3020	2000.81	4214.17	5322.61	2150.06	7705.27	15.216	6874.72	5355.42	3412.22	7708.87	6745.02	12685.3	7611.41	3407.48
3320	2013.34	3991.14	5100.09	2233.03	8334.66	17.65	6623.18	5111.09	3656.21	7905.18	6840.88	13567.5	7523.66	3516.19
3620	1983.92	4018.85	4923.06	2068.4	8475.42	15.81	6806.24	5187.23	3424.6	8168.45	6946.84	12716.8	7137.25	3942.68
3920	1959.12	4014.28	5759.21	2115.65	8077.75	12.415	7230.51	5005.18	3805.07	8350.07	7012.2	12600.1	8506.34	3642.54
4220	2123.47	4776.81	4985.79	2448.02	9226.23	14.891	7769.72	4598.02	3715.63	8616.99	6814.1	13685.8	7389.37	3559.53
4520	2024.58	4050.42	5016.14	2645.89	8446.89	18.254	7805.09	4785.79	3500.26	8199.77	6324.87	13844.4	6079.09	3732.52
time
0	9482.63	6057.57	5537.79	4093.54	11191.2	7541.5	5332.58	4166.86	7820.49	7308.06	16132.2	7379.74	3649.13
30	9360.15	5942.33	5310.81	3964.23	11478.1	7303.47	4995.36	4029.7	8331.46	7191.87	16692.4	7186.03	3498.12
60	9281.63	6087.5	5757.36	4008.98	10868.2	7161.38	4942.81	4050.71	7973.9	7542.11	16404.6	7334.58	3559.51
90	9281.77	5653.16	5427.13	4002.57	10988.6	7173.67	4773.67	3988.97	8119.31	7352.02	16240	7512.99	3511.1
120	9306.72	5650.71	5549.27	3929.31	10486.7	7637.07	5076.9	4008.7	8109.48	7386.34	16198.4	7739.51	3503.76
130	1783.2	1440.38	1484.47	769.052	2941.48	7241.25	4729.54	4026.71	7685.94	7327.46	16517.2	7494	3485.3
160	1940.02	1772.15	2112.96	1021.17	3499.8	7088.89	4773.46	4155.89	7961.08	7319.1	16501	7344.62	3575.3
190	1951.96	1892.36	2391.68	1088.5	3628.48	7117.56	4947.31	4169.52	7721.19	7489.91	16625.9	8026.41	3348.05
220	1943.99	1864.31	1921.82	1062.81	3949.44	7106.89	4906.6	4257.59	8017.01	7236.47	15860.2	7598.32	3447.86
250	2006.05	1957.39	1975.48	1114.87	4062.91	7215.09	5069.48	4187.68	7996.15	7490.17	16095.5	7942.98	3479.95
280	1989.11	2002.37	2661.98	1206.08	4010.83	7396.88	5030.58	4127.1	7966.18	7176.54	15404.5	7843.26	3525.91
310	2056.64	2029.06	2637.95	1385.91	4185.46	7285.5	4701.41	3921.28	7986.03	7097.71	15481.8	6806.32	3443.18
320	2005.73	2079.9	2753.87	1415.54	4231.41	7235.87	4871.34	4035.85	7783.37	7018.52	15297.3	7017.24	3483.68
620	2056.26	2396.81	2853.27	1802.17	5885.65	7006.62	4849.11	3685.28	8028.42	6893.84	14740.1	7197.78	3673.67
920	2083.46	2741.75	2949.96	1645.39	6054.63	6714.61	4982.81	3900.65	8084.12	6955.23	14919.3	7396.09	3409.86
1220	2016.06	3233.97	3987.41	1627.06	6493.98	6611.71	5187.34	3703.69	7937.65	6816.43	13415.7	6472.28	3590.11
1520	1940.14	2956.57	4186.24	1898.67	7338.25	7218.19	5071.01	3791.8	7637.4	6888.55	12841.3	6231.35	3453.37
1820	2002.59	3721.96	4820.91	1508.52	7742.96	7177.07	5664.97	3738.05	7659.06	6622.91	14072.8	6198.02	3550.55
2120	2004.48	4167.29	4590.04	1689.37	8865.21	7373.26	5286.5	3727.65	8287.83	6641.57	13698.8	7021.7	3716.68
2420	1926.16	4112.21	5033.69	2135.25	8039.19	6843.49	5334.18	3620.18	8075.84	6301.13	13333.2	6843.8	3748.48
2720	2045.22	3864.3	5581.06	2186.76	7908.81	6905.13	5575.46	3553.89	7863.51	6211.34	14245.5	6843.46	3448.28
3020	1985.6	4198.95	5307.4	2134.85	7690.06	6859.5	5340.2	3397.01	7693.65	6729.8	12670.1	7596.2	3392.27
3320	1995.69	3973.49	5082.44	2215.38	8317.01	6605.53	5093.44	3638.56	7887.53	6823.23	13549.9	7506.01	3498.54
3620	1968.12	4003.04	4907.25	2052.59	8459.61	6790.43	5171.42	3408.79	8152.64	6931.03	12701	7121.44	3926.87
3920	1946.7	4001.87	5746.8	2103.24	8065.34	7218.1	4992.76	3792.65	8337.65	6999.78	12587.7	8493.92	3630.12
4220	2108.58	4761.92	4970.9	2433.13	9211.34	7754.83	4583.13	3700.74	8602.1	6799.21	13670.9	7374.48	3544.64
4520	2006.33	4032.16	4997.88	2627.64	8428.64	7786.84	4767.54	3482.01	8181.51	6306.61	13826.2	6060.83	3714.26
	AVERAGE OF PREBLEACH
	9342.58	5878.25	5516.47	3999.73	11002.6	7363.42	5024.26	4048.99	8070.93	7356.08	16333.5	7430.57	3544.32
NORMALIZED DATA
time	b1	b2	b3	b4	b5	c1	c2	c3	c4	c5	c6	c7	c8	Average of controls
120	1	1	1	1	1	1	1	1	1	1	1	1	1	1
130	0.190868	0.245035	0.269098	0.192276	0.267345	0.983409	0.94134	0.994498	0.952299	0.99611	1.01124	1.00854	0.983348	0.983848
160	0.207653	0.301475	0.383028	0.25531	0.31809	0.962717	0.950081	1.0264	0.986389	0.994974	1.01026	0.988433	1.00874	0.990999
190	0.208931	0.321926	0.433553	0.272143	0.329785	0.966611	0.984684	1.02977	0.956668	1.01819	1.0179	1.08019	0.944622	0.999829
220	0.208079	0.317154	0.348379	0.26572	0.358956	0.965161	0.97658	1.05152	0.993319	0.98374	0.971019	1.02258	0.972784	0.992087
250	0.214721	0.332988	0.358106	0.278736	0.36927	0.979855	1.009	1.03425	0.990735	1.01823	0.985425	1.06896	0.981839	1.00854
280	0.212908	0.34064	0.482552	0.30154	0.364536	1.00454	1.00126	1.01929	0.987021	0.975593	0.943121	1.05554	0.994805	0.997647
310	0.220136	0.345181	0.478195	0.346501	0.380408	0.989419	0.935741	0.968459	0.989481	0.964876	0.947856	0.915989	0.971465	0.960411
320	0.214687	0.35383	0.499208	0.35391	0.384584	0.982678	0.969563	0.996755	0.964371	0.954112	0.936557	0.944375	0.982891	0.966413
620	0.220096	0.407742	0.517226	0.450573	0.534934	0.951544	0.965139	0.910173	0.994734	0.937162	0.902443	0.968672	1.03649	0.958295
920	0.223007	0.466423	0.534755	0.411376	0.550293	0.911887	0.991749	0.963363	1.00164	0.945508	0.913416	0.99536	0.962061	0.960622
1220	0.215793	0.550158	0.722819	0.406794	0.590224	0.897913	1.03246	0.91472	0.983487	0.92664	0.821363	0.871034	1.01292	0.932567
1520	0.207666	0.502967	0.758862	0.4747	0.666958	0.980277	1.0093	0.936481	0.946285	0.936444	0.786191	0.83861	0.974338	0.925991
1820	0.214351	0.633175	0.873911	0.377155	0.703741	0.974693	1.12752	0.923207	0.948969	0.900332	0.861591	0.834124	1.00176	0.946524
2120	0.214553	0.708933	0.832061	0.422372	0.805741	1.00134	1.05219	0.920638	1.02687	0.902868	0.838693	0.944974	1.04863	0.967026
2420	0.20617	0.699563	0.912483	0.533849	0.730665	0.929391	1.06168	0.894096	1.00061	0.856588	0.81631	0.921033	1.0576	0.942164
2720	0.218913	0.65739	1.01171	0.546727	0.718815	0.937762	1.10971	0.877724	0.9743	0.844382	0.872161	0.920988	0.972904	0.938741
3020	0.212532	0.714319	0.9621	0.533748	0.698933	0.931564	1.06288	0.838977	0.953255	0.914862	0.775713	1.02229	0.957099	0.93208
3320	0.213612	0.675964	0.921321	0.553884	0.755916	0.897073	1.01377	0.898634	0.977277	0.927563	0.829575	1.01015	0.987083	0.942641
3620	0.210661	0.680991	0.889562	0.513183	0.768877	0.922185	1.02929	0.841887	1.01012	0.942219	0.777605	0.958397	1.10793	0.948705
3920	0.208369	0.680792	1.04175	0.525845	0.733041	0.980264	0.993731	0.936692	1.03305	0.951565	0.770664	1.14311	1.02421	0.97916
4220	0.225696	0.81009	0.901101	0.608325	0.8372	1.05316	0.9122	0.913992	1.06581	0.924298	0.836985	0.992452	1.00009	0.962373
4520	0.214751	0.685945	0.905992	0.656955	0.766061	1.0575	0.948903	0.859971	1.0137	0.857334	0.846491	0.815662	1.04795	0.930939
CORRECTED DATA
Time	b1	b2	b3	b4	b5			Filter out due to large abrupt change or wrong targeting.
120	1	1	1	1	1
130	0.194002	0.249058	0.273515	0.195433	0.271734
160	0.209539	0.304213	0.386507	0.257629	0.320979
190	0.208967	0.321981	0.433627	0.272189	0.329841
220	0.209738	0.319683	0.351157	0.267839	0.361819
250	0.212904	0.33017	0.355075	0.276377	0.366144
280	0.21341	0.341443	0.48369	0.302251	0.365395
310	0.22921	0.35941	0.497907	0.360784	0.396089
320	0.222148	0.366127	0.516558	0.36621	0.39795
620	0.229675	0.425487	0.539736	0.470182	0.558214
920	0.232148	0.485542	0.556676	0.428239	0.57285
1220	0.231397	0.58994	0.775085	0.436209	0.632903
1520	0.224264	0.543166	0.819513	0.51264	0.720264
1820	0.226461	0.668947	0.923284	0.398463	0.7435
2120	0.221869	0.733106	0.860433	0.436774	0.833215
2420	0.218826	0.742507	0.968497	0.566619	0.775518
2720	0.233199	0.700289	1.07773	0.582405	0.765723
3020	0.228019	0.766371	1.03221	0.572641	0.749864
3320	0.226611	0.717097	0.977383	0.587588	0.801913
3620	0.222051	0.717811	0.937659	0.54093	0.810449
3920	0.212804	0.695282	1.06392	0.537037	0.748643
4220	0.23452	0.841763	0.936332	0.632109	0.869932
4520	0.230682	0.736832	0.973203	0.705691	0.822891
	Normalize the bouton fluorescent right after bleaching to 0
Recovery Time_(sec)	b1	b2	b3	b4	b5
0	0	0	0	0	0
30	0.0192772	0.0734481	0.155532	0.0773034	0.0676191
60	0.0185673	0.0971091	0.220393	0.0954008	0.0797877
90	0.0195242	0.0940488	0.106873	0.0899946	0.123698
120	0.0234521	0.108013	0.112266	0.100606	0.129636
150	0.0240801	0.123026	0.289304	0.132765	0.128608
180	0.0436834	0.146951	0.308873	0.205516	0.170754
190	0.0349213	0.155896	0.334546	0.212259	0.17331
480	0.0442593	0.234943	0.366451	0.341487	0.393373
780	0.0473286	0.314917	0.389768	0.289356	0.41347
1080	0.0463958	0.453939	0.690407	0.299261	0.49593
1380	0.0375464	0.391652	0.751562	0.394258	0.615888
1680	0.0402723	0.55915	0.894401	0.252347	0.647794
1980	0.0345749	0.644588	0.807887	0.299964	0.770983
2280	0.0308001	0.657106	0.956636	0.461349	0.691758
2580	0.0486319	0.600886	1.10699	0.480969	0.678308
2880	0.042205	0.688885	1.04433	0.468834	0.656531
3180	0.0404578	0.623269	0.968868	0.487411	0.728002
3480	0.0348005	0.62422	0.914189	0.42942	0.739722
3780	0.023328	0.594218	1.08799	0.424581	0.654856
4080	0.0502707	0.789282	0.912361	0.542747	0.821401
4380	0.0455093	0.649549	0.963114	0.634202	0.756807

## Sheet: WT 26nov F4
time	b1	b2	b3	b4	b5	background	c1	c2	c3	c4	c5	c6	c7	c8
0	8220.26	4750.54	5021.69	4878.34	6025.62	16.794	8597.09	7435.45	7416.18	5267.46	10234.2	3886.28	5898.24	2720.15
30	7458.71	4492.76	5134.48	5163.21	5495.79	16.055	7970.29	7536.61	7390.79	5064.13	9394.74	3719.4	5918.56	2717.11
60	7402.67	4820.32	4584.7	5176.75	5854.53	10.308	8448.93	7468.11	6963.78	4855.86	9631.02	3699.52	5859.46	2580.88
90	7829.83	4651.02	4975.88	5181.41	6013.34	14.813	8110.31	7560.76	6963.02	5413.12	9419.41	3657.94	6113.81	2696.86
120	7283.19	4615.88	4741.2	5295.16	5901.04	17.486	8404.82	7707.61	7687.28	5341.77	9170.9	3729.48	5702.68	2624.92
130	2760.24	1504.03	1027.83	1511.28	1713.11	17.546	8494.39	7455.55	6885.49	5306.75	9836.63	3787.72	5537.83	2675.75
160	3733.39	2611.55	1352.82	1805.19	2276.54	16.142	7963.33	7022.98	6699.55	5145.05	9089.02	4029.76	5746.24	2706.56
190	3889.16	1922.31	1557.62	1838.81	2014.86	15.515	8074.15	6970.03	6390.68	5209.05	9429.95	3802.9	5856.6	2610.02
220	4671.35	2301.24	1492.49	2016.2	2140.89	9.555	8842.33	7479.98	7381.08	5141.91	9691.11	3753.58	5594.59	2589.02
250	4518.41	2398.91	1466.63	1931.06	2301.04	17.496	8632.65	7032.38	7080.66	5709.11	9583.25	3787.21	5681.76	2782.61
280	5252.68	2132.07	1583.01	1915.36	2435.72	14.302	8502.97	7067.34	7369.67	5140.68	9525.79	3612.37	5753.22	2591.43
310	6317.38	2527.26	1619.81	1941.55	2324.37	15.364	8849.66	6427.6	6729.26	5232.56	9428.07	3798.9	5972.6	2585.25
320	5854.23	2310.61	1567.13	1932.58	2226.58	10.927	8786.78	6719.03	7052.93	5021.95	9159.96	4030.11	5720.15	2645.68
620	7319.65	2437.82	1960.42	2370.91	2368.48	14.913	8744.2	6975.3	7197.46	5419.99	9313.65	3657.13	5681.89	2499.88
920	6182.29	3097.98	2875.28	2454.22	3014.25	11.812	8668.55	6818.61	7046.35	5104.09	9853.77	3572.03	5756.9	2538.37
1220	7245.52	3211.59	3128.94	2574.12	2998.67	16.514	9489.55	6440.91	6563.99	5450.93	10523.9	3528.62	5698.05	2530.18
1520	7357.71	3898.71	2758.63	2700.86	3302.86	17.894	8764.59	6526.48	7061.32	5600.32	9904.91	3798.91	5667.57	2397.2
1820	8198.98	3553.54	3285.75	2753.82	3466.41	11.711	8897.42	6816.95	6566.45	5368.15	10112.2	3402.9	5236.6	2608.65
2120	7517.28	3535.3	3950.68	3263.49	3682.79	21.067	8722.67	6164.02	6900.41	4934.47	9338.62	4028.19	5832.2	2601.55
2420	7533.71	3432.8	4257.57	3444.63	3979.64	10.106	8454.24	6222.12	7769.16	5796.04	8558.44	3737.73	5882.26	2631.59
2720	7583.37	3587.6	3677.87	3330.64	4156.58	16.664	8677.96	7164.98	7017.05	5575.84	9004.48	3799.86	5733.05	2527.59
3020	8745.8	3412.82	3902.21	3786.74	4612.94	10.672	8831.35	5238.51	6936.32	5218.1	9816.06	3782.5	5829.88	2420.22
3320	7509.35	3373.25	4159.62	3957.83	4031.35	12.605	8659.28	6385.7	7156.62	5750.96	9182.8	3954.85	5627.92	2456.39
3620	8337.44	3064.4	5179.49	3890.97	4342.36	15.997	9071.16	5794.62	6674.77	5134.87	8747.2	3864.93	5608.59	2507.99
3920	6320.53	3239.56	4815.48	3960.9	4392.35	11.635	9231.55	6383.58	7519.49	5378.28	8011.04	4032.18	6126.54	2654.61
4220	6581.45	3298.28	5063.92	4102.69	4265.88	8.605	9425.17	6300.59	6939.91	5538.26	8826.33	3714.41	5639.85	2689.75
4520	5738.48	3189.51	5574.49	4102.86	4887.68	12.061	10049.8	6195.69	7406.34	5520.63	8854.3	3737.33	5579.09	2618.86
time
0	8203.47	4733.75	5004.9	4861.54	6008.83	8580.29	7418.66	7399.39	5250.66	10217.4	3869.49	5881.45	2703.36
30	7442.66	4476.71	5118.42	5147.15	5479.73	7954.24	7520.55	7374.74	5048.07	9378.68	3703.35	5902.51	2701.06
60	7392.36	4810.01	4574.39	5166.45	5844.22	8438.62	7457.8	6953.48	4845.55	9620.71	3689.22	5849.15	2570.57
90	7815.02	4636.2	4961.07	5166.6	5998.52	8095.5	7545.94	6948.21	5398.31	9404.6	3643.13	6099	2682.05
120	7265.7	4598.39	4723.72	5277.68	5883.55	8387.34	7690.12	7669.79	5324.28	9153.41	3712	5685.19	2607.43
130	2742.69	1486.48	1010.28	1493.73	1695.56	8476.85	7438.01	6867.95	5289.2	9819.08	3770.18	5520.28	2658.2
160	3717.25	2595.41	1336.68	1789.05	2260.4	7947.19	7006.84	6683.41	5128.9	9072.88	4013.62	5730.1	2690.42
190	3873.64	1906.8	1542.1	1823.29	1999.35	8058.63	6954.52	6375.16	5193.54	9414.44	3787.38	5841.09	2594.5
220	4661.8	2291.68	1482.94	2006.64	2131.33	8832.77	7470.42	7371.53	5132.36	9681.56	3744.03	5585.04	2579.47
250	4500.91	2381.42	1449.14	1913.56	2283.54	8615.15	7014.89	7063.16	5691.62	9565.75	3769.71	5664.26	2765.12
280	5238.38	2117.77	1568.71	1901.06	2421.41	8488.66	7053.04	7355.37	5126.38	9511.49	3598.07	5738.91	2577.12
310	6302.01	2511.9	1604.44	1926.18	2309.01	8834.3	6412.23	6713.9	5217.2	9412.7	3783.54	5957.24	2569.88
320	5843.31	2299.68	1556.2	1921.65	2215.65	8775.85	6708.1	7042	5011.03	9149.03	4019.18	5709.23	2634.75
620	7304.74	2422.91	1945.51	2356	2353.57	8729.28	6960.39	7182.54	5405.07	9298.74	3642.21	5666.97	2484.97
920	6170.47	3086.17	2863.47	2442.41	3002.44	8656.74	6806.8	7034.54	5092.28	9841.96	3560.22	5745.09	2526.56
1220	7229.01	3195.08	3112.43	2557.61	2982.16	9473.04	6424.39	6547.48	5434.42	10507.4	3512.1	5681.54	2513.67
1520	7339.81	3880.82	2740.74	2682.97	3284.97	8746.69	6508.59	7043.43	5582.43	9887.01	3781.02	5649.67	2379.31
1820	8187.27	3541.83	3274.04	2742.11	3454.69	8885.71	6805.24	6554.74	5356.44	10100.5	3391.19	5224.89	2596.94
2120	7496.21	3514.23	3929.61	3242.43	3661.73	8701.61	6142.95	6879.35	4913.4	9317.56	4007.12	5811.13	2580.48
2420	7523.6	3422.7	4247.47	3434.53	3969.54	8444.14	6212.01	7759.06	5785.94	8548.33	3727.62	5872.16	2621.48
2720	7566.7	3570.94	3661.2	3313.97	4139.92	8661.3	7148.31	7000.38	5559.18	8987.81	3783.2	5716.38	2510.92
3020	8735.13	3402.15	3891.54	3776.06	4602.27	8820.67	5227.84	6925.65	5207.42	9805.39	3771.83	5819.2	2409.55
3320	7496.74	3360.64	4147.02	3945.22	4018.75	8646.68	6373.09	7144.01	5738.35	9170.19	3942.24	5615.32	2443.78
3620	8321.45	3048.4	5163.5	3874.97	4326.36	9055.17	5778.62	6658.78	5118.87	8731.21	3848.93	5592.59	2491.99
3920	6308.9	3227.93	4803.85	3949.26	4380.72	9219.91	6371.94	7507.86	5366.65	7999.41	4020.54	6114.91	2642.97
4220	6572.85	3289.67	5055.32	4094.08	4257.28	9416.57	6291.98	6931.3	5529.65	8817.73	3705.81	5631.25	2681.14
4520	5726.42	3177.45	5562.43	4090.8	4875.62	10037.7	6183.63	7394.28	5508.57	8842.24	3725.27	5567.03	2606.8
	AVERAGE OF PREBLEACH
	7623.84	4651.01	4876.5	5123.88	5842.97	8291.2	7526.62	7269.12	5173.38	9554.97	3723.44	5883.46	2652.89
NORMALIZED DATA
time	b1	b2	b3	b4	b5	c1	c2	c3	c4	c5	c6	c7	c8	Average of controls
120	1	1	1	1	1	1	1	1	1	1	1	1	1	1
130	0.359752	0.319604	0.207173	0.291523	0.290189	1.02239	0.988227	0.944812	1.02239	1.02764	1.01255	0.938271	1.002	0.994786
160	0.487582	0.558032	0.274106	0.349159	0.386858	0.958509	0.930941	0.919425	0.991404	0.949546	1.07793	0.973934	1.01415	0.97698
190	0.508096	0.409975	0.316231	0.355841	0.34218	0.97195	0.92399	0.87702	1.0039	0.985292	1.01717	0.992798	0.97799	0.968764
220	0.611476	0.492727	0.304099	0.391625	0.364769	1.06532	0.992534	1.01409	0.992072	1.01325	1.00553	0.949278	0.972322	1.00055
250	0.590373	0.512022	0.297167	0.373459	0.390819	1.03907	0.932011	0.971667	1.10017	1.00113	1.01243	0.962744	1.0423	1.00769
280	0.687105	0.455336	0.321688	0.371019	0.414415	1.02382	0.937079	1.01186	0.990916	0.995449	0.96633	0.975432	0.971439	0.984041
310	0.826619	0.540076	0.329015	0.375923	0.395177	1.0655	0.851941	0.923619	1.00847	0.985111	1.01614	1.01254	0.96871	0.979004
320	0.766452	0.494447	0.319122	0.375037	0.379199	1.05845	0.89125	0.968755	0.968619	0.957516	1.07943	0.970386	0.993161	0.985946
620	0.958144	0.520942	0.398956	0.459807	0.402803	1.05284	0.92477	0.98809	1.04479	0.973184	0.978186	0.963204	0.936702	0.98272
920	0.809366	0.663548	0.587198	0.476672	0.513855	1.04409	0.904364	0.967729	0.984324	1.03004	0.956166	0.976482	0.95238	0.976946
1220	0.94821	0.686965	0.63825	0.499154	0.510384	1.14254	0.853557	0.900725	1.05046	1.09968	0.943243	0.96568	0.94752	0.987926
1520	0.962745	0.834403	0.562029	0.523621	0.562208	1.05494	0.864743	0.968952	1.07907	1.03475	1.01546	0.960264	0.896874	0.984382
1820	1.0739	0.761518	0.671391	0.535161	0.591256	1.0717	0.904157	0.901724	1.03539	1.05709	0.910768	0.888064	0.978907	0.968475
2120	0.983259	0.755584	0.805827	0.632806	0.626689	1.0495	0.816163	0.946379	0.949748	0.975153	1.07619	0.987707	0.972703	0.971693
2420	0.986852	0.735904	0.871007	0.670298	0.67937	1.01845	0.825339	1.0674	1.11841	0.894648	1.00112	0.998079	0.988161	0.988951
2720	0.992505	0.767777	0.750786	0.646769	0.708529	1.04464	0.949738	0.96303	1.07457	0.940643	1.01605	0.971602	0.946486	0.988345
3020	1.14577	0.731485	0.798019	0.736953	0.787659	1.06386	0.694581	0.952749	1.00658	1.02621	1.013	0.989079	0.908271	0.956791
3320	0.983329	0.722562	0.850409	0.769967	0.687792	1.04287	0.846741	0.982789	1.10921	0.95973	1.05877	0.954425	0.921176	0.984464
3620	1.0915	0.655427	1.05885	0.756256	0.740439	1.09214	0.767758	0.916036	0.989464	0.913787	1.0337	0.950562	0.939349	0.95035
3920	0.827523	0.694027	0.985102	0.770756	0.749741	1.11201	0.846588	1.03284	1.03736	0.837199	1.07979	1.03934	0.996261	0.997674
4220	0.862144	0.707302	1.03667	0.79902	0.728615	1.13573	0.835964	0.953527	1.06887	0.922842	0.995266	0.957132	1.01065	0.984997
4520	0.75112	0.683174	1.14066	0.798378	0.834442	1.21065	0.821569	1.01722	1.06479	0.925407	1.00049	0.946218	0.982627	0.996122
CORRECTED DATA
Time	b1	b2	b3	b4	b5			Filter out due to large abrupt change or wrong targeting.
120	1	1	1	1	1
130	0.361637	0.32128	0.208259	0.293051	0.29171
160	0.499071	0.571181	0.280565	0.357386	0.395973
190	0.524478	0.423194	0.326427	0.367315	0.353213
220	0.611141	0.492457	0.303933	0.39141	0.364569
250	0.585867	0.508114	0.294899	0.370609	0.387836
280	0.698248	0.46272	0.326905	0.377036	0.421136
310	0.844347	0.551658	0.336071	0.383985	0.403652
320	0.777377	0.501495	0.323671	0.380383	0.384605
620	0.974992	0.530102	0.405971	0.467892	0.409886
920	0.828465	0.679206	0.601055	0.48792	0.525981
1220	0.959799	0.69536	0.646051	0.505254	0.516622
1520	0.97802	0.847642	0.570947	0.531928	0.571128
1820	1.10886	0.786306	0.693245	0.552582	0.610503
2120	1.0119	0.777595	0.829302	0.651241	0.644946
2420	0.997878	0.744126	0.880739	0.677787	0.68696
2720	1.00421	0.776831	0.759639	0.654396	0.716885
3020	1.19751	0.76452	0.834058	0.770234	0.82323
3320	0.998847	0.733965	0.863829	0.782118	0.698646
3620	1.14853	0.689669	1.11417	0.795766	0.779122
3920	0.829451	0.695644	0.987398	0.772552	0.751489
4220	0.875275	0.718076	1.05246	0.81119	0.739713
4520	0.754045	0.685834	1.1451	0.801487	0.837691
	Normalize the bouton fluorescent right after bleaching to 0
Recovery Time_(sec)	b1	b2	b3	b4	b5
0	0	0	0	0	0
30	0.215291	0.368194	0.0913246	0.0910039	0.147204
60	0.255092	0.150157	0.149251	0.105048	0.0868336
90	0.390849	0.252206	0.120839	0.139132	0.102866
120	0.351258	0.275274	0.10943	0.109708	0.135716
150	0.527304	0.208393	0.149854	0.118799	0.18273
180	0.756168	0.339431	0.161432	0.128628	0.158046
190	0.651259	0.265522	0.14577	0.123534	0.131154
480	0.960824	0.30767	0.249718	0.247318	0.166847
780	0.731289	0.527355	0.496117	0.275648	0.330756
1080	0.937025	0.551156	0.552948	0.300167	0.317542
1380	0.965568	0.775521	0.458089	0.337899	0.394498
1680	1.17053	0.685152	0.612557	0.367113	0.450088
1980	1.01865	0.672318	0.784402	0.50667	0.498717
2280	0.996676	0.623005	0.849369	0.54422	0.558035
2580	1.00659	0.671191	0.696415	0.511133	0.600283
2880	1.3094	0.653052	0.790409	0.67499	0.750427
3180	0.998194	0.608035	0.828011	0.6918	0.574534
3480	1.23267	0.54277	1.1442	0.711105	0.688154
3780	0.732834	0.551574	0.984084	0.678269	0.649139
4080	0.804617	0.584623	1.06626	0.732922	0.632513
4380	0.614709	0.53712	1.18327	0.719197	0.770844

## Sheet: WT 27nov F3
time	b1	b2	b3	b4	b5	background	c1	c2	c3	c4	c5	c6	c7	c8
0	4337.66	4736.2	3006.46	5337.5	6436.86	16.794	3420.16	3484.88	4468.33	6076.83	4345.04	2044.72	2299.49	2592.77
30	4340.51	4431.56	2776.12	5126.22	6800.88	16.369	3219.95	3612.74	4294.35	5799.99	4298.45	1961.51	2530.61	2586.54
60	4056.8	4488.79	2864.9	5033.42	6717.39	18.488	3310.81	3518.9	4467.72	6124.19	4505.55	1877.28	2502.65	2544.63
90	4109.24	4379.07	2787.82	5212.96	6797.43	16.115	3300.04	3594.47	4428.68	6274.17	4313.7	2071.55	2404.79	2929.71
120	3861.62	4281.62	2751.17	5179.63	6518.79	13.095	3673.86	3507.34	4202.54	5944.18	4891.94	1928.76	2502.2	2711.24
130	923.038	933.485	758.716	1926.34	1353.75	16.048	3635.03	3538.09	4244.41	6148.61	4711.44	1740.98	2542.56	2763.87
160	1080.63	983.14	820.055	2297.66	1502.89	12.791	3408.13	3405.32	4422.51	6159.88	4288.77	1868.27	2510.15	2656.26
190	1306.86	982.037	851.982	2492.72	1690.61	14.446	3220.39	3564.89	4381.15	5720.97	4364.84	2048.8	2469.96	2646.48
220	1421.5	1024.15	835.935	2455.47	1701.97	13.133	3251.63	3052.54	4372.56	5547.09	4542.9	1862.86	2536.84	2618.57
250	1633.51	1062.68	827.782	2550.68	1677.91	17.508	3319.01	3007.51	4274.37	5916.58	4064.46	1965.35	2172.86	2642.34
280	1560.31	1093.12	887.427	2618.51	1726.54	20.738	3218.38	3010.38	4097.34	5788.23	4003.66	1872.39	1985.08	2432.5
310	1749.24	1114.76	913.377	2779.45	1724.52	10.953	3239.64	3028.16	4147.85	5572.48	3853.28	1779.15	2120.09	2288.96
320	1809.45	1107.93	889.4	2866.19	1686.04	17.219	3202.72	3143.1	4270.04	5753.75	3884.56	1635.89	2049.72	2304.39
620	1643.62	1048.22	1091.21	3012.66	2030.13	11.725	2947	3226.91	4022.74	5837.26	3635.17	1745.13	2753.78	2285.8
920	1735.82	1835.29	1022.47	3033.99	2349.63	14.427	2838.8	2707.42	4743.67	5331.57	4062.74	2014.95	2902.91	2474.9
1220	2301.54	2332.13	1163.82	3170.14	2502.44	10.371	2722.36	2847.54	4304.23	5881.35	3747.11	2170.83	2962.05	2574.36
1520	2497.73	2140.68	1187.31	3159.72	2482.51	10.898	2579.85	3025.96	4368.33	5437.91	3636.65	2242.33	3068.59	2371.3
1820	2607.78	2315.95	958.709	3672.17	2524.86	14.4	2394.18	2890.05	4581.07	5752.96	3486.5	1964.77	2957	2323.4
2120	2758	2316.07	974.902	3276.73	2411.66	15.317	2438.63	2821.89	4528.9	5563.28	3740.64	1998.65	3103.62	2381.4
2420	2986.8	2035.37	1003.41	3342.56	2501.8	15.95	2483.42	2617.35	4588.5	5670.09	3086.71	1706.62	3146.66	2462.4
2720	3436.22	2036.15	899.444	2975.92	2482.95	16.526	2369.81	2951.28	4734.4	5504.53	3842.22	1894.72	3259.82	2397.33
3020	2946.91	2348.53	1030.58	3504.37	2571.4	15.238	2758	2659.28	4720.53	5511.91	3684.82	1657.48	3202.38	2589.68
3320	3232.74	2587.41	1099.5	3080.11	2751.42	15.376	2542.85	2896.39	4240.9	5518.51	4114.21	1792.37	3521.53	2623.01
3620	2944.03	2772.25	1364.84	3074.48	2631.87	15.154	2504.12	2820.97	4239.49	5171.97	3755.65	1861.86	3404.73	2685.76
3920	3090.66	2203.67	1247.2	2756.16	2661.89	14.21	2460.36	2928.63	4357.33	5267.86	3354.54	1473.23	3189.38	2831.54
4220	3391.85	2498.25	1355.57	3102.14	2861.61	13.187	2933.43	2889.9	4730.61	5081.02	4297.53	1577.67	3117.86	2663.06
4520	2936.34	3309.16	1283.51	3125.6	2802.72	17.28	2607.22	2924.22	4488.36	5498.64	4765.94	1704.29	3275.65	3011.07
time
0	4320.87	4719.41	2989.67	5320.7	6420.06	3403.37	3468.08	4451.53	6060.03	4328.24	2027.93	2282.7	2575.97
30	4324.14	4415.2	2759.75	5109.85	6784.51	3203.58	3596.37	4277.98	5783.62	4282.08	1945.14	2514.24	2570.17
60	4038.31	4470.3	2846.41	5014.93	6698.9	3292.32	3500.41	4449.23	6105.7	4487.06	1858.79	2484.16	2526.14
90	4093.12	4362.95	2771.7	5196.84	6781.31	3283.93	3578.36	4412.56	6258.06	4297.58	2055.43	2388.68	2913.6
120	3848.52	4268.52	2738.07	5166.54	6505.7	3660.76	3494.24	4189.45	5931.08	4878.85	1915.67	2489.11	2698.14
130	906.99	917.437	742.668	1910.29	1337.7	3618.99	3522.04	4228.36	6132.56	4695.39	1724.93	2526.51	2747.82
160	1067.84	970.349	807.264	2284.87	1490.1	3395.34	3392.53	4409.72	6147.09	4275.98	1855.48	2497.36	2643.47
190	1292.41	967.591	837.536	2478.27	1676.16	3205.94	3550.44	4366.7	5706.53	4350.39	2034.35	2455.52	2632.04
220	1408.37	1011.02	822.802	2442.34	1688.83	3238.5	3039.41	4359.43	5533.96	4529.76	1849.73	2523.71	2605.44
250	1616	1045.17	810.274	2533.17	1660.4	3301.5	2990	4256.86	5899.07	4046.95	1947.84	2155.35	2624.83
280	1539.58	1072.38	866.689	2597.77	1705.81	3197.64	2989.64	4076.6	5767.49	3982.92	1851.65	1964.34	2411.77
310	1738.29	1103.81	902.424	2768.5	1713.57	3228.69	3017.2	4136.9	5561.53	3842.32	1768.2	2109.14	2278.01
320	1792.23	1090.71	872.181	2848.97	1668.82	3185.5	3125.88	4252.82	5736.53	3867.34	1618.67	2032.5	2287.17
620	1631.9	1036.49	1079.49	3000.93	2018.4	2935.27	3215.19	4011.02	5825.54	3623.45	1733.41	2742.06	2274.07
920	1721.4	1820.86	1008.04	3019.57	2335.2	2824.37	2693	4729.24	5317.15	4048.32	2000.53	2888.48	2460.47
1220	2291.17	2321.76	1153.44	3159.77	2492.07	2711.99	2837.17	4293.86	5870.98	3736.74	2160.46	2951.68	2563.99
1520	2486.83	2129.78	1176.42	3148.82	2471.61	2568.95	3015.07	4357.43	5427.01	3625.75	2231.44	3057.7	2360.4
1820	2593.38	2301.55	944.309	3657.77	2510.46	2379.78	2875.65	4566.67	5738.56	3472.1	1950.37	2942.6	2309
2120	2742.68	2300.76	959.585	3261.42	2396.34	2423.31	2806.57	4513.58	5547.96	3725.32	1983.33	3088.31	2366.08
2420	2970.85	2019.42	987.463	3326.61	2485.85	2467.47	2601.4	4572.55	5654.14	3070.76	1690.67	3130.71	2446.45
2720	3419.69	2019.63	882.918	2959.4	2466.42	2353.28	2934.76	4717.87	5488.01	3825.7	1878.2	3243.29	2380.8
3020	2931.67	2333.29	1015.34	3489.13	2556.16	2742.76	2644.04	4705.29	5496.67	3669.58	1642.25	3187.14	2574.44
3320	3217.36	2572.04	1084.13	3064.73	2736.04	2527.48	2881.02	4225.53	5503.13	4098.84	1777	3506.15	2607.63
3620	2928.88	2757.09	1349.68	3059.32	2616.71	2488.97	2805.81	4224.33	5156.82	3740.5	1846.71	3389.58	2670.6
3920	3076.45	2189.46	1232.99	2741.95	2647.68	2446.15	2914.42	4343.12	5253.65	3340.33	1459.02	3175.17	2817.33
4220	3378.66	2485.06	1342.38	3088.95	2848.42	2920.24	2876.71	4717.42	5067.84	4284.35	1564.49	3104.67	2649.87
4520	2919.06	3291.88	1266.23	3108.32	2785.44	2589.94	2906.94	4471.09	5481.36	4748.66	1687.01	3258.37	2993.79
	AVERAGE OF PREBLEACH
	4124.99	4447.28	2821.12	5161.77	6638.1	3368.79	3527.49	4356.15	6027.7	4454.76	1960.59	2431.78	2656.81
NORMALIZED DATA
time	b1	b2	b3	b4	b5	c1	c2	c3	c4	c5	c6	c7	c8	Average of controls
120	1	1	1	1	1	1	1	1	1	1	1	1	1	1
130	0.219877	0.206292	0.263253	0.370084	0.201519	1.07427	0.998455	0.970665	1.0174	1.05402	0.879803	1.03896	1.03426	1.00848
160	0.25887	0.218189	0.28615	0.442652	0.224476	1.00788	0.961739	1.0123	1.01981	0.959868	0.946388	1.02697	0.994982	0.991241
190	0.313312	0.217569	0.296881	0.480121	0.252507	0.951659	1.00651	1.00242	0.946717	0.976571	1.03762	1.00976	0.990677	0.990242
220	0.341423	0.227335	0.291658	0.473158	0.254415	0.961324	0.861634	1.00075	0.918089	1.01684	0.943453	1.0378	0.980667	0.96507
250	0.391759	0.235014	0.287217	0.490756	0.250132	0.980026	0.847628	0.977206	0.978661	0.908455	0.993497	0.886327	0.987965	0.944971
280	0.373231	0.241132	0.307214	0.503271	0.256972	0.949196	0.847526	0.935827	0.956831	0.894082	0.944434	0.807778	0.907769	0.90543
310	0.421403	0.248199	0.319881	0.536347	0.258142	0.958412	0.855339	0.949669	0.922662	0.86252	0.901872	0.867324	0.857423	0.896903
320	0.43448	0.245255	0.309161	0.551936	0.251401	0.945592	0.886149	0.976279	0.951695	0.868137	0.825601	0.835808	0.860872	0.893767
620	0.395612	0.233062	0.382644	0.581376	0.304063	0.871313	0.911466	0.920771	0.966461	0.813388	0.884124	1.12759	0.855941	0.918882
920	0.417309	0.409432	0.357319	0.584986	0.351788	0.838392	0.763431	1.08565	0.882119	0.908762	1.02037	1.18781	0.926102	0.951578
1220	0.555435	0.522063	0.40886	0.612149	0.375419	0.805034	0.804303	0.985701	0.974	0.83882	1.10194	1.21379	0.965063	0.961082
1520	0.60287	0.478896	0.417003	0.610028	0.372337	0.762573	0.854734	1.00029	0.900345	0.813905	1.13814	1.25739	0.888435	0.951978
1820	0.628699	0.517518	0.334728	0.708626	0.37819	0.70642	0.815212	1.04833	0.952032	0.779414	0.994787	1.21006	0.869088	0.921918
2120	0.664893	0.51734	0.340143	0.63184	0.360998	0.719341	0.795627	1.03614	0.920411	0.836256	1.0116	1.26998	0.890574	0.934991
2420	0.720207	0.45408	0.350025	0.644471	0.374483	0.732451	0.737465	1.04968	0.938027	0.689321	0.862326	1.28742	0.920822	0.902188
2720	0.829018	0.454126	0.312967	0.573329	0.371555	0.698554	0.831966	1.08304	0.910465	0.858788	0.957974	1.33371	0.896114	0.946326
3020	0.710709	0.524656	0.359908	0.675956	0.385074	0.814168	0.749553	1.08015	0.911902	0.823744	0.837628	1.31062	0.968997	0.937095
3320	0.779968	0.57834	0.384289	0.593736	0.412173	0.750262	0.816733	0.970014	0.912974	0.920103	0.906356	1.44181	0.981492	0.962467
3620	0.710032	0.619951	0.478421	0.592689	0.394196	0.738832	0.795412	0.96974	0.855521	0.839662	0.941913	1.39387	1.00519	0.942518
3920	0.745808	0.492315	0.437057	0.531202	0.398861	0.726121	0.826201	0.997009	0.871585	0.749833	0.744174	1.3057	1.06042	0.91013
4220	0.819072	0.558782	0.475833	0.598428	0.429102	0.866851	0.815511	1.08293	0.840758	0.961746	0.797966	1.27671	0.99739	0.954983
4520	0.707652	0.740201	0.44884	0.602181	0.419615	0.768805	0.824081	1.02638	0.909362	1.06597	0.860461	1.33991	1.12684	0.990227
CORRECTED DATA
Time	b1	b2	b3	b4	b5			Filter out due to large abrupt change or wrong targeting.
120	1	1	1	1	1
130	0.218029	0.204558	0.26104	0.366973	0.199825
160	0.261158	0.220117	0.288679	0.446563	0.22646
190	0.3164	0.219713	0.299806	0.484852	0.254995
220	0.35378	0.235563	0.302214	0.490284	0.263624
250	0.414572	0.2487	0.303943	0.519335	0.264698
280	0.412214	0.266318	0.339302	0.555836	0.283812
310	0.469843	0.276729	0.356651	0.597999	0.287815
320	0.486123	0.274406	0.345908	0.617539	0.281282
620	0.430536	0.253637	0.416423	0.632699	0.330906
920	0.438544	0.430267	0.375501	0.614753	0.369689
1220	0.577927	0.543204	0.425417	0.636937	0.390621
1520	0.633282	0.503053	0.438039	0.6408	0.391119
1820	0.681947	0.561349	0.363078	0.768643	0.410221
2120	0.711123	0.553311	0.363793	0.675771	0.386098
2420	0.798289	0.50331	0.387974	0.714342	0.415083
2720	0.876038	0.479884	0.330718	0.605848	0.392629
3020	0.758417	0.559874	0.384068	0.721331	0.410924
3320	0.810384	0.600893	0.399275	0.61689	0.428246
3620	0.753335	0.657761	0.507599	0.628836	0.418238
3920	0.819452	0.540929	0.480214	0.583655	0.438247
4220	0.857682	0.585123	0.498263	0.626637	0.449329
4520	0.714636	0.747506	0.45327	0.608124	0.423756
	Normalize the bouton fluorescent right after bleaching to 0
Recovery Time_(sec)	b1	b2	b3	b4	b5
0	0	0	0	0	0
30	0.0551545	0.019561	0.0374021	0.125729	0.0332862
60	0.125799	0.0190529	0.0524604	0.186215	0.068947
90	0.173602	0.038979	0.0557192	0.194796	0.0797308
120	0.251344	0.0554936	0.0580585	0.240687	0.0810737
150	0.248328	0.0776424	0.105908	0.298349	0.104961
180	0.322025	0.0907304	0.129386	0.364954	0.109963
190	0.342844	0.08781	0.114848	0.395822	0.101799
480	0.271759	0.0617	0.210273	0.419771	0.163815
780	0.281999	0.283752	0.154895	0.391421	0.212284
1080	0.460245	0.425733	0.222443	0.426465	0.238443
1380	0.531033	0.375257	0.239524	0.432568	0.239065
1680	0.593268	0.448545	0.138084	0.634523	0.262938
1980	0.630578	0.438439	0.139051	0.487812	0.232791
2280	0.742048	0.37558	0.171773	0.548743	0.269013
2580	0.841475	0.346129	0.0942919	0.377353	0.240952
2880	0.691059	0.446691	0.166488	0.559783	0.263815
3180	0.757515	0.498258	0.187067	0.394796	0.285464
3480	0.684561	0.569749	0.333657	0.413668	0.272956
3780	0.769111	0.422873	0.296597	0.342295	0.297962
4080	0.818001	0.478432	0.321023	0.410194	0.311812
4380	0.635071	0.682574	0.260136	0.380949	0.279852

[truncated: 11 more sheets: KO oct21 F2, KO oct21 F3, KO oct22 F2, KO oct22 F3, KO nov11 F1, KO nov11 F2, KO nov9 F2, KO nov24 F2, KO nov25 F3, KO 27Nov F1, KO nov27 F2]
