# Supplementary material for: A proline-rich motif on VGLUT1 reduces synaptic vesicle super-pool and spontaneous release frequency
Source: eLife journal article supplement (doi:10.7554/elife.50401), 2019-10-30
Supplement: supp [file elife-50401-supp-v1.zip › elife_poa_e50401_Figure_1_source_data_2.xlsx]

## Sheet: WT 13nov F1
time	b1	b2	b3	b4	b5	background	c1	c2	c3	c4	c5	c6	c7	c8
0	5369.08	6565.49	5730.31	7696.85	4277.89	99.789	4603.42	5091.75	4402.38	8056.81	9300.24	4537.67	7406.11	8243.56
30	4917.23	6622.94	5540.69	7430.04	3773.16	103.166	4511.33	5190.72	4228.54	8069.42	9684.08	4332.41	7610.54	7186.09
60	5011.28	6525.99	5424.08	7456.02	3263.84	93.602	4250.9	4612.68	4318.79	7826.49	9041.79	4200.4	7606.45	7946.31
90	4207.44	6484	5670.16	7070.57	3424.99	101.287	4428.12	4894.97	4498.41	7682.25	9285.27	4254.54	7245.9	7520.05
120	4736.02	6287.15	5651.37	6813.47	3968.03	102.729	4241.58	4690.29	4783.43	7568.6	8695.14	4398.31	7265.22	7385.36
130	428.747	451.899	349.922	653.69	184.574	96.817	4058.85	4290.66	4135.94	7561.15	8529.16	4037.68	5123.02	6838.64
160	642.628	717.667	678.205	1232.59	314.099	97.285	4204.84	4862.38	4094.61	7549.46	8276.44	4095.22	5228.68	6708.32
190	724.608	876.601	1062.1	1585.46	389.128	94.087	4748.13	4845.05	4019.29	7523.05	8030.53	4075.71	5498.5	6945.9
220	864.554	1081.31	1150.01	1527.38	417.754	89.613	4343.85	4507.22	3646.86	7338.73	7601.54	4179.81	5681.86	6952.72
250	872.746	1194.12	1061.94	1866.39	415.038	97.489	4074.16	4442.69	3816.24	7481.44	7404.95	4089.29	5394.67	6595.61
280	908.299	1137.05	1034.17	1946.38	481.844	98.796	3988.04	4763.33	3962.88	7118.08	7375.55	4251.41	5460.21	6446.01
310	977.827	1231.58	1271.12	1820.36	547.158	105.606	4377.49	4781.47	4048.29	7154.1	7147.84	3956.76	5506.3	5924.18
320	971.496	1170.58	1199.62	1852.62	529.898	111.393	4358.99	4639.4	3627.18	6898.69	6962.91	3929.82	5539.13	5935.89
620	1244.66	1849.86	1935.12	3014.9	738.883	111.479	4632.61	3396.82	4320.45	7424.86	7789.57	4111.52	6211.39	6567.31
920	1854.72	2813.98	3084.77	4127.71	949.604	96.634	4437.99	4572.32	3943.5	8193.97	8164.41	4144.56	6235.53	6466.47
1220	2379.8	3010.55	3099.9	4777.79	1032.72	91.269	4536.79	5164.97	4064.71	8717.42	8557.9	4262.84	5914.19	7495.49
1520	2504.67	3264.95	2625.73	5093.04	1218.73	102.723	4922.02	4533.69	3750.39	8534.1	8652.32	4884.09	6256.39	7759.56
1820	2399.75	2497.14	3196.6	5998.96	1241.43	84.838	4930.48	5092.8	4289.69	8020.67	8847.2	4790.79	6541.25	8218.45
2120	2850.4	3602.25	3070.87	6258.27	1382.64	107.032	4724.8	4662.39	4582.7	7956.21	8776.56	4801.67	6231.73	8988.84
2420	2480.93	4224.86	2984.81	5881.11	1462.61	89.524	4887.99	5560.88	3951.24	7115.18	8378.05	5013.02	6103.24	9531.77
2720	3078.09	3659.48	3204.33	5036.35	1435.3	112.489	4750.71	5656.25	3809.11	8001.15	9155.76	4966.8	5705.19	8775.67
3020	3443.69	3548.16	3097.29	6067.4	1609.06	91.645	4933	6371.19	4072.89	7193.29	9083.66	4698.49	6465.3	8899.46
3320	3110.14	3274.44	2993.01	8611.28	1558.77	89.612	4286.06	4629.36	3793.87	7197.34	9008.69	4563.02	5760.4	8252.08
3620	3446.15	4055.56	3524.41	7838.05	1725.02	90.621	4351.06	6392.62	3746.38	7199.14	8891.68	4510.69	6850.99	7628.6
3920	3490.78	4039.86	4205.23	7011.24	1674.54	105.968	4141.1	6966.41	4646.93	7298.33	9252.3	4554.04	6508.68	8929.17
4220	3465.01	4098.79	3800.49	3411.84	1772.67	122.46	4403.48	6806.35	4046.32	7352.01	8532.98	4105.91	6223	9570.16
4520	3496.13	4714.85	3926.6	4454.4	1909.94	129.981	4029.63	6753.16	4455.61	8247.17	8867.33	4501.13	7186.69	8765.52
time
0	5269.29	6465.7	5630.52	7597.06	4178.1	4503.64	4991.96	4302.59	7957.02	9200.45	4437.88	7306.32	8143.77
30	4814.07	6519.77	5437.52	7326.87	3669.99	4408.16	5087.55	4125.38	7966.25	9580.92	4229.25	7507.38	7082.93
60	4917.68	6432.39	5330.48	7362.42	3170.24	4157.3	4519.08	4225.18	7732.89	8948.19	4106.8	7512.84	7852.7
90	4106.15	6382.71	5568.88	6969.28	3323.7	4326.84	4793.69	4397.12	7580.97	9183.98	4153.25	7144.61	7418.77
120	4633.29	6184.43	5548.64	6710.74	3865.31	4138.85	4587.56	4680.7	7465.87	8592.41	4295.59	7162.49	7282.63
130	331.93	355.082	253.105	556.873	87.757	3962.03	4193.85	4039.13	7464.34	8432.35	3940.86	5026.21	6741.82
160	545.343	620.382	580.92	1135.31	216.814	4107.56	4765.09	3997.32	7452.17	8179.15	3997.94	5131.39	6611.03
190	630.521	782.514	968.015	1491.37	295.041	4654.05	4750.96	3925.2	7428.96	7936.44	3981.63	5404.41	6851.81
220	774.941	991.696	1060.39	1437.76	328.141	4254.24	4417.6	3557.25	7249.11	7511.93	4090.2	5592.24	6863.11
250	775.257	1096.63	964.45	1768.9	317.549	3976.67	4345.2	3718.75	7383.96	7307.46	3991.8	5297.18	6498.12
280	809.503	1038.25	935.372	1847.58	383.048	3889.25	4664.53	3864.09	7019.28	7276.75	4152.61	5361.42	6347.21
310	872.221	1125.98	1165.51	1714.75	441.552	4271.89	4675.86	3942.69	7048.49	7042.24	3851.15	5400.69	5818.57
320	860.103	1059.19	1088.23	1741.22	418.505	4247.6	4528.01	3515.79	6787.3	6851.52	3818.43	5427.74	5824.5
620	1133.18	1738.38	1823.65	2903.42	627.404	4521.13	3285.34	4208.97	7313.38	7678.09	4000.04	6099.91	6455.84
920	1758.08	2717.35	2988.14	4031.08	852.97	4341.36	4475.68	3846.86	8097.34	8067.78	4047.93	6138.89	6369.84
1220	2288.53	2919.28	3008.63	4686.52	941.45	4445.52	5073.7	3973.44	8626.15	8466.63	4171.57	5822.92	7404.22
1520	2401.95	3162.23	2523.01	4990.32	1116.01	4819.29	4430.97	3647.66	8431.38	8549.59	4781.36	6153.66	7656.84
1820	2314.91	2412.3	3111.77	5914.12	1156.6	4845.64	5007.96	4204.85	7935.83	8762.37	4705.95	6456.41	8133.61
2120	2743.37	3495.22	2963.84	6151.24	1275.61	4617.77	4555.36	4475.67	7849.18	8669.53	4694.64	6124.7	8881.81
2420	2391.41	4135.34	2895.28	5791.59	1373.09	4798.47	5471.35	3861.72	7025.65	8288.52	4923.5	6013.72	9442.25
2720	2965.6	3546.99	3091.84	4923.87	1322.81	4638.22	5543.76	3696.63	7888.66	9043.27	4854.31	5592.7	8663.18
3020	3352.05	3456.52	3005.65	5975.75	1517.42	4841.35	6279.54	3981.24	7101.64	8992.01	4606.85	6373.66	8807.81
3320	3020.52	3184.82	2903.39	8521.67	1469.16	4196.44	4539.75	3704.26	7107.72	8919.08	4473.41	5670.78	8162.47
3620	3355.53	3964.94	3433.78	7747.43	1634.4	4260.44	6302	3655.76	7108.52	8801.06	4420.07	6760.37	7537.98
3920	3384.81	3933.89	4099.26	6905.27	1568.57	4035.13	6860.44	4540.96	7192.36	9146.33	4448.07	6402.71	8823.21
4220	3342.55	3976.33	3678.03	3289.38	1650.21	4281.02	6683.89	3923.86	7229.55	8410.52	3983.45	6100.54	9447.7
4520	3366.15	4584.87	3796.62	4324.42	1779.96	3899.65	6623.18	4325.63	8117.18	8737.35	4371.15	7056.71	8635.54
	AVERAGE OF PREBLEACH
	4748.09	6397	5503.21	7193.28	3641.47	4306.96	4795.97	4346.2	7740.6	9101.19	4244.55	7326.73	7556.16
NORMALIZED DATA
time	b1	b2	b3	b4	b5	c1	c2	c3	c4	c5	c6	c7	c8	Average of controls
120	1	1	1	1	1	1	1	1	1	1	1	1	1	1
130	0.069908	0.0555076	0.0459923	0.0774158	0.0240993	0.919915	0.874453	0.929348	0.96431	0.92651	0.928452	0.68601	0.892229	0.890153
160	0.114855	0.0969801	0.10556	0.157829	0.0595403	0.953703	0.993562	0.919729	0.962738	0.89869	0.941899	0.700366	0.87492	0.905701
190	0.132795	0.122325	0.1759	0.207328	0.0810225	1.08059	0.990616	0.903134	0.95974	0.872022	0.938055	0.73763	0.906785	0.923571
220	0.163211	0.155025	0.192687	0.199876	0.0901123	0.98776	0.921108	0.818474	0.936506	0.825379	0.963635	0.763266	0.90828	0.890551
250	0.163277	0.171428	0.175252	0.24591	0.0872036	0.923314	0.906012	0.855634	0.953925	0.802913	0.940452	0.722994	0.859976	0.870652
280	0.17049	0.162302	0.169969	0.256849	0.105191	0.903015	0.972595	0.889073	0.906814	0.799538	0.978339	0.731761	0.840005	0.877643
310	0.183699	0.176016	0.211788	0.238383	0.121257	0.991858	0.974957	0.907158	0.910587	0.773771	0.907316	0.737122	0.770043	0.871602
320	0.181147	0.165576	0.197745	0.242062	0.114928	0.986219	0.944128	0.808936	0.876844	0.752815	0.899606	0.740814	0.770828	0.847524
620	0.23866	0.271749	0.331379	0.40363	0.172294	1.04973	0.685021	0.968426	0.944808	0.843636	0.942393	0.832556	0.854381	0.890118
920	0.370271	0.424784	0.542982	0.560395	0.234238	1.00799	0.933218	0.88511	1.04609	0.886453	0.953675	0.837877	0.842999	0.924176
1220	0.48199	0.456351	0.546704	0.651514	0.258536	1.03217	1.05791	0.914234	1.1144	0.930277	0.982806	0.79475	0.979892	0.975806
1520	0.505876	0.49433	0.458461	0.693748	0.306473	1.11896	0.923895	0.839278	1.08924	0.939393	1.12647	0.839892	1.01332	0.986306
1820	0.487545	0.377099	0.565446	0.822174	0.317618	1.12507	1.0442	0.967478	1.02522	0.962771	1.1087	0.881213	1.07642	1.02389
2120	0.577784	0.546384	0.538566	0.855137	0.3503	1.07217	0.949832	1.02979	1.01403	0.95257	1.10604	0.835939	1.17544	1.01698
2420	0.503656	0.64645	0.526109	0.80514	0.377069	1.11412	1.14082	0.888528	0.907637	0.910707	1.15996	0.820792	1.24961	1.02402
2720	0.624588	0.554477	0.561826	0.68451	0.363263	1.07691	1.15592	0.850543	1.01913	0.993636	1.14366	0.763328	1.14651	1.0187
3020	0.705977	0.540334	0.546163	0.830741	0.416704	1.12408	1.30934	0.916029	0.917454	0.988004	1.08536	0.869919	1.16565	1.04698
3320	0.636155	0.497862	0.527582	1.18467	0.403453	0.974341	0.946576	0.852299	0.918239	0.979991	1.05392	0.773986	1.08024	0.947449
3620	0.70671	0.619812	0.623961	1.07704	0.448831	0.989199	1.31402	0.841139	0.918342	0.967022	1.04135	0.922699	0.997594	0.998921
3920	0.712878	0.614959	0.744885	0.959962	0.430753	0.936886	1.43046	1.04481	0.929173	1.00496	1.04795	0.873884	1.16768	1.05448
4220	0.703976	0.621593	0.668343	0.457286	0.453172	0.993979	1.39365	0.902826	0.933978	0.924111	0.938485	0.832642	1.25033	1.02125
4520	0.708947	0.716722	0.689892	0.601175	0.488802	0.905429	1.38099	0.995268	1.04865	0.960023	1.02983	0.963146	1.14285	1.05327
CORRECTED DATA
Time	b1	b2	b3	b4	b5
120	1	1	1	1	1
130	0.0785348	0.0623573	0.0516678	0.086969	0.0270733
160	0.126814	0.107077	0.116551	0.174261	0.0657394
190	0.143784	0.132448	0.190456	0.224485	0.0877274
220	0.18327	0.174078	0.216368	0.224441	0.101187
250	0.187535	0.196896	0.201289	0.282443	0.100159
280	0.194259	0.18493	0.193665	0.292658	0.119856
310	0.21076	0.201946	0.242987	0.2735	0.139119
320	0.213737	0.195364	0.23332	0.285612	0.135604
620	0.268122	0.305295	0.372286	0.453456	0.193563
920	0.40065	0.459636	0.587531	0.606373	0.253456
1220	0.49394	0.467666	0.56026	0.667668	0.264946
1520	0.512899	0.501193	0.464826	0.70338	0.310728
1820	0.476171	0.368302	0.552255	0.802994	0.310208
2120	0.568139	0.537264	0.529576	0.840863	0.344453
2420	0.491841	0.631286	0.513767	0.786252	0.368224
2720	0.61312	0.544297	0.55151	0.671942	0.356594
3020	0.6743	0.516089	0.521657	0.793466	0.398007
3320	0.67144	0.525477	0.556845	1.25038	0.425831
3620	0.707474	0.620481	0.624635	1.0782	0.449316
3920	0.67605	0.58319	0.706403	0.910369	0.408499
4220	0.689328	0.608659	0.654436	0.44777	0.443742
4520	0.67309	0.680472	0.654999	0.570769	0.46408
	Normalize the bouton fluorescent right after bleaching to 0
Recovery Time_(sec)
0	0	0	0	0	0
30	0.0523934	0.0476942	0.0684181	0.0956073	0.0397421
60	0.0708099	0.074752	0.14635	0.150615	0.062342
90	0.113661	0.11915	0.173674	0.150566	0.0761762
120	0.11829	0.143487	0.157773	0.214094	0.0751193
150	0.125587	0.130724	0.149733	0.225281	0.0953644
180	0.143495	0.148872	0.201743	0.204299	0.115164
190	0.146725	0.141852	0.19155	0.217564	0.111551
490	0.205745	0.259095	0.338087	0.401396	0.171123
790	0.349569	0.423699	0.565058	0.568879	0.232682
1090	0.45081	0.432263	0.536301	0.636012	0.244492
1390	0.471384	0.468021	0.435669	0.675126	0.291548
1690	0.431526	0.326291	0.527861	0.784228	0.291014
1990	0.531333	0.50649	0.503946	0.825705	0.326212
2290	0.448531	0.606764	0.487276	0.765892	0.350644
2590	0.580147	0.51399	0.527075	0.640693	0.33869
2890	0.646541	0.483907	0.495595	0.773793	0.381256
3190	0.643437	0.493919	0.532701	1.27423	0.409853
3490	0.682542	0.595242	0.604184	1.08565	0.433992
3790	0.64844	0.55547	0.690407	0.901831	0.39204
4090	0.66285	0.582633	0.635609	0.395169	0.428264
4390	0.645228	0.659222	0.636202	0.529883	0.449167

## Sheet: WT 12nov F3
time	b1	b2	b3	b4	b5	background	c1	c2	c3	c4	c5	c6	c7	c8
0	5241.11	10813.8	7107.31	3820.77	3298.24	64.864	3155.24	3727.49	3760.55	4298.08	3451.94	3195.61	3973.34	5919.86
30	5128.67	10287.9	6999.31	3876.42	3320.49	63.898	2932.7	3600.26	3590.64	4451.76	3173.01	3338.87	3938.4	5707.28
60	5095.61	10417.5	6791.9	3671.3	3094.58	60.812	2967.61	3611.44	3509.86	4158.04	3229.11	3418.21	3707.09	5685.68
90	5034.54	10127.7	7263.6	3714.5	2947.86	53.83	2749.99	3524.37	3572.63	4327.06	3218.93	3598.47	3787.13	5540.53
120	4901.74	10096.3	7083.21	3531.55	2885.53	55.485	2795.17	3490.05	3293.87	4254.97	3196.05	3458.58	3571.34	5655.03
130	307.744	550.161	556.393	194.945	226.607	60.928	2652.95	3220.64	3376.76	4220.31	3132.6	3572.95	3709.89	5005.78
160	456.752	818.974	842.057	281.241	330.602	50.393	2578.34	3188.2	3364.65	4084.29	3026.21	3498.08	3434.46	5056.01
190	536.272	941.277	1018.86	325.141	380.016	62.139	2614.44	3530.33	3198.42	4023.16	3105.09	3345.52	3550.37	5080.29
220	530.054	1096.81	985.475	342.072	345.57	56.486	2534.91	3384.02	3137.09	4035.89	3106.99	3303.08	3326.36	5047.32
250	556.4	1125.9	1143.03	359.148	376.448	61.552	2527.22	3514.07	3033.67	3892.68	2919.18	3407.89	3278.53	5020.03
280	587.464	1121.13	1255.94	376.078	375.547	53.52	2447.34	3345.79	3130.46	3820.45	3091.01	3376.03	3350.98	4917.53
310	630.489	1139.54	1157.91	375.014	398.511	47.46	2420.87	3413.22	3090.07	3826.46	2829.18	3359.21	3231.67	4959.01
320	598.5	1102.09	1302.53	368.427	389.015	42.284	2388.38	3271.24	3024.32	3637.26	2835.69	3487.61	3181.32	4771.88
620	917.255	1437.55	1375.55	574.214	505.321	50.161	2858.01	3460.53	3192.59	4230.41	3010.3	3535.79	3257.48	4935.08
920	990.882	1690.53	2046.38	606.115	1061.95	55.815	3056.2	3204.82	3370	4480.1	3182.11	3642.04	3614.9	4883.87
1220	1171.55	1734.48	2067.46	559.929	953.629	54.186	3078.59	3765.73	3395.62	4222.71	2938.61	3442.56	3825.39	5241.48
1520	1287.7	1818.17	2232.56	582.658	748.176	51.25	3365.7	3265.14	3369.74	4397.31	3004.95	3472.41	3581.78	5292.32
1820	1354.19	1782.98	2359.78	731.766	743.972	56.198	3074.21	3417.51	3352.19	4322.01	3152.43	3979.68	3671.78	5704.51
2120	1346.91	1796.26	2212.4	824.774	856.4	63.051	2769.8	3425.77	3247.54	4690.51	3145.54	3649.81	3414.41	5192.05
2420	1688.42	1877.18	2511.23	1401.47	978.058	52.757	2609.91	3648.68	3112.03	4354.48	3080.38	3666.29	3495.18	4968.92
2720	1907.94	1771.55	2621.39	1984.57	874.699	43.355	2884.03	3781.76	3330.25	5012.07	3342.45	3810.12	3539.18	5237.13
3020	1774.74	2025.49	2650.64	1904.14	851.948	38.979	2904.63	3934.86	3347.79	5040.37	3138.92	3737.54	3650.1	5234.74
3320	1843.08	2078.12	2471.07	2273.36	945.124	55.413	2707.32	3868.95	3124.72	4786.63	3105.36	3935.32	3647.28	5312.15
3620	1831.21	2134.65	2491.3	1790.47	867.749	95.646	3135.03	4035.4	3202.92	4756.86	3006.06	3873.05	3630.82	5331.79
3920	2077.21	2168.69	2584.36	1858.17	926.466	43.585	2949.54	3569.51	3319.29	4492.12	3225.61	3917.65	3707.11	5249.52
4220	2079.91	2217.17	2981.83	1668.11	1021.05	62.106	2734.99	3669.96	3271.13	4212.29	3390.15	3640.53	3791.81	5398.3
4520	1965.72	2123	3424.34	1664.68	1119.38	57.226	3075.8	3607.18	3106.43	4464.14	3228.55	3776.81	3561.82	5457.56
time
0	5176.24	10749	7042.45	3755.9	3233.38	3090.37	3662.62	3695.69	4233.22	3387.07	3130.75	3908.47	5855
30	5064.77	10224	6935.42	3812.52	3256.6	2868.81	3536.36	3526.75	4387.86	3109.11	3274.98	3874.5	5643.38
60	5034.79	10356.6	6731.09	3610.49	3033.77	2906.8	3550.63	3449.05	4097.23	3168.29	3357.39	3646.28	5624.86
90	4980.71	10073.9	7209.77	3660.67	2894.03	2696.16	3470.54	3518.8	4273.23	3165.1	3544.64	3733.3	5486.7
120	4846.26	10040.8	7027.73	3476.06	2830.05	2739.69	3434.57	3238.39	4199.48	3140.56	3403.1	3515.86	5599.54
130	246.816	489.233	495.465	134.017	165.679	2592.02	3159.72	3315.84	4159.38	3071.67	3512.02	3648.96	4944.85
160	406.359	768.581	791.664	230.848	280.209	2527.94	3137.8	3314.26	4033.9	2975.82	3447.68	3384.07	5005.62
190	474.133	879.138	956.724	263.002	317.877	2552.3	3468.19	3136.28	3961.03	3042.95	3283.38	3488.23	5018.15
220	473.568	1040.32	928.989	285.586	289.084	2478.43	3327.54	3080.6	3979.4	3050.51	3246.6	3269.87	4990.83
250	494.848	1064.35	1081.48	297.596	314.896	2465.67	3452.52	2972.12	3831.12	2857.62	3346.34	3216.98	4958.48
280	533.944	1067.62	1202.42	322.558	322.027	2393.82	3292.27	3076.94	3766.93	3037.49	3322.51	3297.46	4864.01
310	583.029	1092.08	1110.45	327.554	351.051	2373.41	3365.76	3042.61	3779	2781.72	3311.75	3184.21	4911.55
320	556.216	1059.8	1260.24	326.143	346.731	2346.1	3228.96	2982.04	3594.98	2793.4	3445.33	3139.03	4729.6
620	867.094	1387.39	1325.39	524.053	455.16	2807.85	3410.36	3142.42	4180.24	2960.13	3485.63	3207.32	4884.92
920	935.067	1634.71	1990.57	550.3	1006.13	3000.38	3149	3314.18	4424.28	3126.3	3586.22	3559.09	4828.05
1220	1117.36	1680.3	2013.27	505.743	899.443	3024.4	3711.54	3341.43	4168.52	2884.43	3388.37	3771.2	5187.29
1520	1236.45	1766.92	2181.31	531.408	696.926	3314.45	3213.89	3318.49	4346.06	2953.7	3421.16	3530.53	5241.07
1820	1297.99	1726.78	2303.59	675.568	687.774	3018.01	3361.31	3295.99	4265.81	3096.24	3923.48	3615.59	5648.31
2120	1283.86	1733.21	2149.35	761.723	793.349	2706.75	3362.72	3184.49	4627.46	3082.49	3586.76	3351.36	5129
2420	1635.66	1824.42	2458.47	1348.71	925.301	2557.15	3595.92	3059.27	4301.72	3027.62	3613.53	3442.42	4916.16
2720	1864.58	1728.19	2578.03	1941.21	831.344	2840.68	3738.4	3286.9	4968.72	3299.09	3766.76	3495.82	5193.77
3020	1735.76	1986.51	2611.66	1865.16	812.969	2865.65	3895.89	3308.82	5001.39	3099.94	3698.56	3611.12	5195.76
3320	1787.67	2022.71	2415.65	2217.94	889.711	2651.91	3813.53	3069.31	4731.22	3049.95	3879.91	3591.87	5256.74
3620	1735.56	2039.01	2395.66	1694.83	772.103	3039.38	3939.75	3107.27	4661.22	2910.41	3777.4	3535.18	5236.15
3920	2033.63	2125.1	2540.78	1814.58	882.881	2905.95	3525.92	3275.7	4448.54	3182.02	3874.07	3663.52	5205.94
4220	2017.8	2155.06	2919.73	1606	958.945	2672.88	3607.85	3209.02	4150.18	3328.04	3578.42	3729.7	5336.19
4520	1908.5	2065.78	3367.11	1607.45	1062.15	3018.57	3549.95	3049.21	4406.92	3171.33	3719.58	3504.6	5400.34
	AVERAGE OF PREBLEACH
	5020.55	10288.9	6989.29	3663.13	3049.56	2860.37	3530.95	3485.73	4238.2	3194.03	3342.17	3735.68	5641.9
NORMALIZED DATA
time	b1	b2	b3	b4	b5	c1	c2	c3	c4	c5	c6	c7	c8	Average of controls
120	1	1	1	1	1	1	1	1	1	1	1	1	1	1
130	0.0491611	0.0475498	0.0708892	0.0365854	0.0543288	0.906184	0.894864	0.951259	0.981402	0.961693	1.05082	0.976786	0.876452	0.949933
160	0.0809391	0.0747003	0.113268	0.0630193	0.091885	0.883783	0.888658	0.950806	0.951794	0.931682	1.03157	0.905877	0.887223	0.928924
190	0.0944384	0.0854456	0.136884	0.0717971	0.104237	0.892299	0.982226	0.899747	0.9346	0.9527	0.982411	0.933761	0.889444	0.933399
220	0.0943258	0.101111	0.132916	0.0779623	0.0947952	0.866473	0.942392	0.883773	0.938936	0.955066	0.971403	0.875308	0.884602	0.914744
250	0.0985644	0.103447	0.154733	0.0812409	0.103259	0.862011	0.977789	0.852651	0.90395	0.894677	1.00125	0.861149	0.878868	0.904043
280	0.106352	0.103764	0.172037	0.0880553	0.105598	0.836892	0.932405	0.882725	0.888802	0.95099	0.994117	0.882692	0.862123	0.903843
310	0.116128	0.106142	0.158878	0.0894192	0.115115	0.829757	0.953218	0.872876	0.891651	0.870911	0.990899	0.852378	0.870549	0.89153
320	0.110788	0.103005	0.18031	0.089034	0.113699	0.820209	0.914474	0.855498	0.848231	0.874571	1.03087	0.840284	0.838299	0.877804
620	0.172709	0.134844	0.189631	0.143062	0.149254	0.98164	0.96585	0.90151	0.986325	0.926772	1.04292	0.858563	0.865829	0.941177
920	0.186248	0.158882	0.284802	0.150227	0.329928	1.04895	0.891829	0.950784	1.0439	0.978795	1.07302	0.952728	0.85575	0.97447
1220	0.222557	0.163312	0.288051	0.138063	0.294942	1.05735	1.05115	0.958602	0.983559	0.903069	1.01382	1.00951	0.919424	0.98706
1520	0.246277	0.171731	0.312093	0.145069	0.228533	1.15875	0.910207	0.952021	1.02545	0.924756	1.02363	0.945083	0.928955	0.983607
1820	0.258536	0.16783	0.329588	0.184424	0.225532	1.05511	0.951958	0.945567	1.00651	0.969383	1.17393	0.967852	1.00114	1.00893
2120	0.25572	0.168455	0.307521	0.207943	0.260152	0.946295	0.952357	0.913579	1.09184	0.965079	1.07318	0.897122	0.909091	0.968569
2420	0.325793	0.17732	0.351749	0.368185	0.303421	0.893995	1.0184	0.877654	1.01499	0.9479	1.08119	0.921497	0.871367	0.953374
2720	0.371389	0.167968	0.368854	0.529932	0.272611	0.993117	1.05875	0.942957	1.17236	1.03289	1.12704	0.935793	0.920572	1.02294
3020	0.345731	0.193074	0.373667	0.509171	0.266585	1.00185	1.10335	0.949245	1.18007	0.970542	1.10663	0.966657	0.920925	1.02491
3320	0.356069	0.196592	0.345622	0.605478	0.29175	0.927122	1.08003	0.880534	1.11633	0.95489	1.16089	0.961504	0.931733	1.00163
3620	0.345691	0.198176	0.342761	0.462672	0.253185	1.06258	1.11578	0.891425	1.09981	0.911204	1.13022	0.946327	0.928083	1.01068
3920	0.40506	0.206544	0.363524	0.495364	0.289511	1.01594	0.998578	0.939746	1.04963	0.996241	1.15915	0.980684	0.922728	1.00784
4220	0.401908	0.209456	0.417743	0.438424	0.314453	0.934455	1.02178	0.920616	0.979231	1.04196	1.07069	0.998399	0.945815	0.989118
4520	0.380137	0.200778	0.481753	0.438819	0.348295	1.05531	1.00538	0.874768	1.03981	0.992893	1.11292	0.938142	0.957185	0.997052
CORRECTED DATA
Time	b1	b2	b3	b4	b5
120	1	1	1	1	1
130	0.0517522	0.050056	0.0746255	0.0385137	0.0571922
160	0.0871321	0.080416	0.121935	0.0678412	0.0989155
190	0.101177	0.0915425	0.146651	0.0769201	0.111675
220	0.103117	0.110535	0.145304	0.0852285	0.10363
250	0.109026	0.114427	0.171157	0.089864	0.11422
280	0.117666	0.114803	0.190339	0.0974232	0.116832
310	0.130257	0.119056	0.178209	0.100299	0.129121
320	0.12621	0.117344	0.205411	0.101428	0.129526
620	0.183503	0.143271	0.201483	0.152003	0.158583
920	0.191127	0.163044	0.292264	0.154162	0.338571
1220	0.225475	0.165453	0.291827	0.139873	0.298808
1520	0.250382	0.174593	0.317294	0.147487	0.232342
1820	0.256247	0.166344	0.32667	0.182791	0.223535
2120	0.264018	0.173922	0.3175	0.214691	0.268594
2420	0.341726	0.185992	0.368951	0.386192	0.31826
2720	0.363062	0.164201	0.360584	0.51805	0.266498
3020	0.337328	0.188382	0.364585	0.496796	0.260106
3320	0.35549	0.196273	0.34506	0.604493	0.291276
3620	0.342038	0.196082	0.339139	0.457783	0.250509
3920	0.401911	0.204938	0.360698	0.491513	0.28726
4220	0.406329	0.211761	0.422339	0.443248	0.317913
4520	0.381261	0.201372	0.483178	0.440117	0.349325
	Normalize the bouton fluorescent right after bleaching to 0
Recovery Time_(sec)
0	0	0	0	0	0
30	0.0373108	0.0319598	0.0511245	0.0305023	0.0442543
60	0.0521221	0.0436726	0.0778345	0.0399448	0.0577874
90	0.0541683	0.063666	0.0763784	0.0485861	0.0492551
120	0.0603999	0.067763	0.104316	0.0534073	0.0604867
150	0.0695111	0.0681591	0.125046	0.0612693	0.0632575
180	0.0827898	0.072636	0.111937	0.0642598	0.076292
190	0.0785216	0.0708338	0.141332	0.0654346	0.0767219
490	0.138941	0.0981271	0.137088	0.118035	0.107541
790	0.146982	0.118942	0.235189	0.120281	0.298448
1090	0.183204	0.121478	0.234718	0.105419	0.256273
1390	0.20947	0.1311	0.262239	0.113339	0.185775
1690	0.215655	0.122416	0.27237	0.150057	0.176434
1990	0.223851	0.130393	0.262461	0.183235	0.224226
2290	0.3058	0.143099	0.318061	0.361605	0.276905
2590	0.3283	0.12016	0.309019	0.498745	0.222003
2890	0.301162	0.145615	0.313343	0.476639	0.215223
3190	0.320315	0.153921	0.292243	0.58865	0.248283
3490	0.306129	0.153721	0.285845	0.436064	0.205044
3790	0.369269	0.163044	0.309142	0.471145	0.244024
4090	0.373929	0.170225	0.375754	0.420946	0.276536
4390	0.347492	0.159289	0.441499	0.41769	0.309854

## Sheet: WT 12nov F4
time	b1	b2	b3	b4	b5	background	c1	c2	c3	c4	c5	c6	c7	c8
0	4552.69	5940.52	4512.12	7013.23	4939.09	125.715	5038.63	6730.6	3072.58	3022.5	3576.39	4196.58	3967.1	2949.21
30	4288.95	5865.85	4400.3	7076.91	4869.26	117.919	5008.74	6519.13	3009.91	2841.17	3471.73	4261.71	4092.21	3031.95
60	4302.27	5793.59	4233.29	6993.16	4545.34	119.746	4795.22	6836.64	2932.77	2844.62	3422.89	3960.22	3687.02	2859.1
90	4300.22	5710.78	4025.51	6948.1	4776.41	120.153	4925.84	6537.84	2856.68	3034.68	3457.39	3958.49	3857.85	2952.07
120	4385.38	5586.31	4240.32	6848.81	4701.28	135.283	4838.29	6516.68	3044.13	3038.54	3362.12	4061.94	3742.76	2863.31
130	237.611	338.13	243.646	486.788	364.231	112.333	4496.41	6263.21	2826.58	2820.98	3589.16	3686.44	3699.24	2786.48
160	401.532	486.451	358.737	784.677	525.289	129.948	4581.25	6134.74	2951.44	2869.18	3483	3677.18	3681.23	2636.1
190	463.453	547.971	490.131	826.778	596.173	132.934	4450.25	6180.31	2662.27	2587.69	3237.17	3785.3	3785.47	2566.98
220	529.81	593.646	590.322	935.259	621.816	109.906	4579.07	5980.73	2664.99	2687.05	3377.09	3637	3695.26	2540.68
250	544.82	650.909	570.543	920.227	659.283	140.015	4543.93	5861.62	2812.36	2752.43	3420.25	3674.91	3707.2	2449.49
280	586.076	662.434	618.693	974.432	689.539	127.78	4457.67	6137.87	2702.94	2849.31	3210.07	3501.42	3556.83	2461.76
310	576.613	684.901	735.763	992.954	732.154	131.636	4397.8	6036.46	2770.8	2842.51	3484.11	3665.32	3639.97	2425.05
320	562.646	671.715	690.662	964.763	691.426	127.642	4257.21	5784.27	2555.77	2652.4	3578.44	3575	3511.39	2402.29
620	619.975	950.43	1059.27	1148.45	1032.74	135.913	4590.28	5830.07	2741.28	2988	3670.75	3932.38	3876.37	2722.11
920	630.597	1104.84	1416	1220.64	1198.52	128.404	4684.69	6147.89	2900.27	3044.35	3930.89	3772.42	4041.62	2795.71
1220	764.043	1267.74	1593.74	1262.92	1277.11	111.072	4812.67	6159.36	2889.86	2901.39	3882.99	4078.23	3786.51	2752.53
1520	818.028	1531.27	1702.35	1306.64	1340.9	136.027	4538.32	6150.18	2927.23	3067.42	4058.45	4389.99	3754.36	2693.23
1820	825.936	1750.47	1485.02	1472.2	1415.23	128.106	4594.56	6279.15	2974.61	3057.87	3903.23	4158.92	3857.75	2518.88
2120	913.217	1784.86	1718.24	1405.85	1693.1	118.768	4725.33	6179.4	3233.43	2890.29	4002.34	4229.68	3804.72	2566.79
2420	988.214	1774.71	1765.36	1431.28	1711.86	138.279	4429.32	6238.72	3057.69	3247.67	4347.69	4285.51	3850.9	2593.55
2720	1009.11	1790.98	2341.85	1470.93	1671.61	125.429	4488.9	6282.74	3068.61	2917.25	4031.41	4351.77	3751.68	2453.5
3020	995.218	2080.58	2464	1533.77	1657.83	123.327	4781.05	6187.83	2835.43	3051.18	3949.68	4236.29	3830.94	2490.94
3320	1035.41	1838.46	2361.47	1565.1	1578.41	116.966	4707.06	6550.9	2871.34	3327.77	4065.92	4461.35	3620.7	2306.67
3620	1017.96	2122.91	2317.66	1765.28	1535.84	100.455	4922.67	7616.38	2918.36	3264.29	4033.97	4403.33	3650.92	2253.53
3920	982.291	2154.28	2414.56	1641.97	1630.69	112.855	4886.41	7363.17	2959.76	3073.61	4141.66	4414.24	3474.58	2174.06
4220	993.55	2398.11	2345.15	1672.6	1915.3	162.284	4633.66	7480.99	3004.34	2936.35	3840.74	4514.44	3540.78	2225.89
4520	982.024	2283.09	2423.26	1656.01	1612.46	112.228	4440.02	6690.14	2880.14	2825.94	4075.68	4345.04	3537.34	2175.88
time
0	4426.98	5814.81	4386.41	6887.51	4813.38	4912.91	6604.89	2946.86	2896.79	3450.67	4070.87	3841.39	2823.49
30	4171.04	5747.93	4282.38	6958.99	4751.35	4890.82	6401.21	2891.99	2723.25	3353.81	4143.79	3974.29	2914.03
60	4182.52	5673.84	4113.55	6873.42	4425.59	4675.47	6716.9	2813.02	2724.87	3303.15	3840.47	3567.28	2739.36
90	4180.06	5590.62	3905.36	6827.95	4656.26	4805.69	6417.69	2736.53	2914.52	3337.24	3838.34	3737.69	2831.92
120	4250.1	5451.03	4105.04	6713.53	4566	4703	6381.4	2908.85	2903.26	3226.84	3926.66	3607.48	2728.02
130	125.278	225.797	131.313	374.455	251.898	4384.08	6150.88	2714.25	2708.65	3476.83	3574.11	3586.9	2674.15
160	271.584	356.503	228.789	654.729	395.341	4451.3	6004.79	2821.5	2739.23	3353.05	3547.23	3551.29	2506.15
190	330.519	415.037	357.197	693.844	463.239	4317.32	6047.38	2529.34	2454.75	3104.23	3652.37	3652.53	2434.05
220	419.904	483.74	480.416	825.353	511.91	4469.16	5870.82	2555.08	2577.14	3267.18	3527.09	3585.36	2430.78
250	404.805	510.894	430.528	780.212	519.268	4403.91	5721.61	2672.35	2612.42	3280.23	3534.89	3567.18	2309.47
280	458.296	534.654	490.913	846.652	561.759	4329.89	6010.09	2575.16	2721.53	3082.29	3373.64	3429.05	2333.98
310	444.977	553.265	604.127	861.318	600.518	4266.16	5904.82	2639.17	2710.87	3352.47	3533.68	3508.33	2293.41
320	435.004	544.073	563.02	837.121	563.784	4129.57	5656.62	2428.13	2524.76	3450.8	3447.36	3383.75	2274.65
620	484.062	814.517	923.353	1012.54	896.831	4454.37	5694.16	2605.36	2852.08	3534.83	3796.46	3740.46	2586.2
920	502.193	976.435	1287.6	1092.24	1070.12	4556.29	6019.49	2771.87	2915.94	3802.49	3644.02	3913.21	2667.31
1220	652.971	1156.67	1482.67	1151.85	1166.04	4701.6	6048.29	2778.79	2790.31	3771.92	3967.15	3675.44	2641.46
1520	682.001	1395.24	1566.33	1170.62	1204.88	4402.29	6014.15	2791.21	2931.39	3922.42	4253.97	3618.33	2557.2
1820	697.83	1622.37	1356.91	1344.1	1287.12	4466.45	6151.05	2846.51	2929.76	3775.12	4030.82	3729.65	2390.78
2120	794.449	1666.09	1599.47	1287.08	1574.33	4606.56	6060.63	3114.67	2771.53	3883.57	4110.91	3685.96	2448.02
2420	849.935	1636.43	1627.08	1293	1573.58	4291.05	6100.44	2919.41	3109.39	4209.41	4147.23	3712.62	2455.28
2720	883.685	1665.55	2216.42	1345.51	1546.18	4363.47	6157.32	2943.19	2791.82	3905.98	4226.35	3626.25	2328.07
3020	871.891	1957.25	2340.67	1410.44	1534.51	4657.72	6064.5	2712.11	2927.86	3826.35	4112.97	3707.62	2367.61
3320	918.444	1721.49	2244.5	1448.13	1461.45	4590.09	6433.94	2754.37	3210.81	3948.95	4344.38	3503.73	2189.7
3620	917.5	2022.45	2217.2	1664.83	1435.39	4822.22	7515.92	2817.91	3163.83	3933.52	4302.88	3550.47	2153.08
3920	869.436	2041.43	2301.7	1529.11	1517.83	4773.55	7250.32	2846.91	2960.76	4028.81	4301.39	3361.73	2061.2
4220	831.266	2235.82	2182.87	1510.32	1753.02	4471.38	7318.71	2842.05	2774.06	3678.45	4352.16	3378.5	2063.6
4520	869.796	2170.86	2311.03	1543.78	1500.23	4327.79	6577.91	2767.92	2713.72	3963.46	4232.81	3425.11	2063.65
	AVERAGE OF PREBLEACH
	4242.14	5655.64	4158.55	6852.28	4642.51	4797.58	6504.42	2859.45	2832.54	3334.34	3964.03	3745.62	2807.36
NORMALIZED DATA
time	b1	b2	b3	b4	b5	c1	c2	c3	c4	c5	c6	c7	c8	Average of controls
120	1	1	1	1	1	1	1	1	1	1	1	1	1	1
130	0.0295318	0.0399242	0.0315767	0.0546468	0.054259	0.91381	0.945646	0.949221	0.956261	1.04273	0.901636	0.957625	0.952547	0.952435
160	0.0640205	0.0630349	0.0550166	0.0955491	0.0851567	0.927822	0.923186	0.986726	0.967058	1.00561	0.894856	0.948116	0.892705	0.94326
190	0.0779133	0.0733846	0.0858947	0.101257	0.0997819	0.899895	0.929734	0.884554	0.866626	0.930988	0.921378	0.975147	0.867022	0.909418
220	0.098984	0.0855322	0.115525	0.120449	0.110266	0.931545	0.90259	0.893557	0.909835	0.979859	0.889775	0.957212	0.865857	0.916279
250	0.0954247	0.0903335	0.103528	0.113862	0.111851	0.917945	0.87965	0.934566	0.922289	0.983772	0.891743	0.95236	0.822648	0.913122
280	0.108034	0.0945346	0.118049	0.123558	0.121003	0.902515	0.924001	0.900579	0.96081	0.924409	0.851065	0.915481	0.831377	0.90128
310	0.104894	0.0978253	0.145274	0.125698	0.129352	0.889232	0.907817	0.922962	0.957046	1.00544	0.891438	0.936647	0.816928	0.915938
320	0.102544	0.0962	0.135389	0.122167	0.121439	0.860761	0.869659	0.849159	0.891342	1.03493	0.869662	0.903388	0.810243	0.886143
620	0.114108	0.144018	0.222037	0.147767	0.193178	0.928461	0.875429	0.91114	1.0069	1.06013	0.957729	0.99862	0.921218	0.957453
920	0.118382	0.172648	0.309626	0.159398	0.230504	0.949706	0.925446	0.96937	1.02944	1.1404	0.919273	1.04474	0.950111	0.991062
1220	0.153925	0.204515	0.356536	0.168097	0.251165	0.979994	0.929874	0.97179	0.985093	1.13123	1.00079	0.981261	0.940904	0.990117
1520	0.160768	0.246699	0.376652	0.170836	0.259531	0.917607	0.924626	0.976134	1.0349	1.17637	1.07314	0.966015	0.910891	0.997461
1820	0.1645	0.286858	0.326295	0.196153	0.277247	0.930981	0.945673	0.995472	1.03432	1.13219	1.01685	0.995734	0.851609	0.987854
2120	0.187276	0.294589	0.384623	0.187832	0.339112	0.960185	0.931772	1.08925	0.97846	1.16472	1.03705	0.98407	0.872	1.00219
2420	0.200355	0.289344	0.391261	0.188696	0.338951	0.894419	0.937892	1.02097	1.09774	1.26244	1.04622	0.991189	0.874584	1.01568
2720	0.208311	0.294494	0.532979	0.196359	0.333049	0.909515	0.946636	1.02928	0.985625	1.17144	1.06618	0.968131	0.829274	0.98826
3020	0.205531	0.346071	0.562859	0.205836	0.330533	0.970848	0.932367	0.948471	1.03365	1.14756	1.03757	0.989852	0.843357	0.98796
3320	0.216505	0.304385	0.539733	0.211336	0.314796	0.956751	0.989165	0.963251	1.13354	1.18433	1.09595	0.93542	0.779986	1.0048
3620	0.216282	0.357599	0.533168	0.24296	0.309183	1.00513	1.15551	0.985471	1.11696	1.1797	1.08548	0.947898	0.766938	1.03039
3920	0.204952	0.360954	0.553487	0.223154	0.326942	0.994992	1.11468	0.995614	1.04527	1.20828	1.08511	0.897508	0.734214	1.00946
4220	0.195954	0.395326	0.524911	0.220411	0.377601	0.932006	1.12519	0.993915	0.979355	1.1032	1.09791	0.901985	0.735068	0.983579
4520	0.205037	0.383839	0.555731	0.225295	0.32315	0.902079	1.0113	0.967989	0.95805	1.18868	1.06781	0.91443	0.735084	0.968177
CORRECTED DATA
Time	b1	b2	b3	b4	b5
120	1	1	1	1	1
130	0.0310066	0.041918	0.0331536	0.0573759	0.0569687
160	0.0678716	0.0668266	0.058326	0.101297	0.0902791
190	0.0856738	0.080694	0.0944502	0.111343	0.109721
220	0.108028	0.0933474	0.126081	0.131455	0.120341
250	0.104504	0.0989282	0.113379	0.124695	0.122493
280	0.119868	0.104889	0.13098	0.137091	0.134257
310	0.114521	0.106803	0.158606	0.137234	0.141223
320	0.115719	0.10856	0.152784	0.137864	0.137043
620	0.119179	0.150418	0.231904	0.154333	0.201762
920	0.11945	0.174205	0.312419	0.160835	0.232583
1220	0.155461	0.206557	0.360094	0.169775	0.253672
1520	0.161177	0.247327	0.377611	0.171271	0.260192
1820	0.166522	0.290385	0.330306	0.198565	0.280656
2120	0.186867	0.293945	0.383783	0.187422	0.338371
2420	0.197262	0.284877	0.385221	0.185783	0.333718
2720	0.210786	0.297992	0.539311	0.198692	0.337006
3020	0.208036	0.350288	0.569718	0.208344	0.334562
3320	0.215471	0.302931	0.537155	0.210326	0.313293
3620	0.209904	0.347053	0.517445	0.235795	0.300065
3920	0.203032	0.357572	0.548302	0.221063	0.323879
4220	0.199226	0.401926	0.533674	0.22409	0.383905
4520	0.211777	0.396456	0.573998	0.2327	0.333772
	Normalize the bouton fluorescent right after bleaching to 0
Recovery Time_(sec)
0	0	0	0	0	0
30	0.0380446	0.0259984	0.0260355	0.0465941	0.0353227
60	0.0564164	0.0404725	0.0633984	0.0572521	0.0559387
90	0.0794863	0.0536795	0.0961135	0.0785882	0.0672004
120	0.0758491	0.0595045	0.082976	0.0714167	0.0694822
150	0.0917044	0.0657264	0.10118	0.0845677	0.0819574
180	0.0861871	0.0677242	0.129755	0.0847191	0.0893445
190	0.0874231	0.0695581	0.123733	0.0853869	0.0849113
490	0.0909934	0.113247	0.205566	0.102859	0.15354
790	0.0912731	0.138075	0.288841	0.109757	0.186223
1090	0.128437	0.171842	0.338152	0.119241	0.208586
1390	0.134336	0.214396	0.356269	0.120827	0.2155
1690	0.139852	0.259338	0.307342	0.149783	0.2372
1990	0.160847	0.263054	0.362652	0.137961	0.298402
2290	0.171575	0.253589	0.36414	0.136223	0.293467
2590	0.185532	0.267278	0.523514	0.149917	0.296954
2890	0.182694	0.321862	0.554964	0.160158	0.294362
3190	0.190367	0.272432	0.521284	0.16226	0.271809
3490	0.184622	0.318485	0.500898	0.189279	0.257782
3790	0.17753	0.329465	0.532814	0.173651	0.283034
4090	0.173602	0.375759	0.517684	0.176862	0.346687
4390	0.186554	0.37005	0.55939	0.185996	0.293525

## Sheet: WT 11nov F3
time	b1	b2	b3	b4	b5	background	c1	c2	c3	c4	c5	c6	c7	c8
0	5438.08	7319.21	8759.54	4605.25	3949.03	251.501	8445.92	4441.11	4044.4	4345.52	5319.48	3913.83	3226.94	4892.22
30	5552.27	7763.25	9016.01	4390.59	3747.34	319.255	8324.66	4466.88	4277.79	4405	5127.01	3838.67	3327.31	5290.63
60	5369.61	7541.77	8564.99	4444.6	3953.64	280.391	7994.07	4683.5	4197.31	4307.06	4748.3	3916.91	3198.68	4740.39
90	5296.16	7454.07	8277.04	4488.49	3763.96	285.569	7197.54	4514.02	4109.22	4573.44	4862.62	3914.08	3144.67	5045.53
120	5336.99	7536.6	8131.88	4432.81	4259.54	288.782	7452.79	4276.47	4053.31	4397.26	4743.46	4160.11	2919.76	4747.94
130	439.178	526.193	769.291	476.543	381.791	277.664	7091.14	4258.64	3593.44	4283.9	4631.27	3804.7	2943.1	4652.73
160	649.396	880.113	1170.44	680.693	493.624	342.65	6967.38	4301.67	3737.85	4361.71	4562.77	3772.81	3027.98	4432.67
190	872.1	943.753	1254.16	738.698	601.618	258.099	7113.01	4208.31	3529.23	4456.1	4911.19	3761.99	2759.53	4468.53
220	978.094	899.808	1231.85	750.902	601.571	250.667	7072.74	4231.23	3427.78	4378.67	4919.96	3970.27	2912.14	4182.34
250	1008.24	957.325	1766.08	796.485	624.235	250.704	6705.22	4257.49	3427.39	4124.84	4816.11	3988.59	2995.77	4241.3
280	1039.65	920.924	1637.65	751.43	640.812	300.504	6707.88	3928.67	3490.6	4474.9	4751.66	4090.67	2963.36	4091.62
310	1179.63	938.236	1484.78	812.861	625.607	306.173	6624.92	4021.15	3406.05	4073.18	4569.9	3990.16	2748.45	4214.56
320	1124.95	888.799	1435.36	849.318	605.844	290.252	6349.91	3862.16	3313.38	4101.78	4394.67	4006.39	2613.68	4225.55
620	1927.39	1189.62	1868.15	1231.12	1099.81	260.46	7136.13	4670.75	3459.79	4869.79	4615.14	4248.47	2903.08	3732.03
920	2280.51	1505.52	2213.66	1100.94	1306.1	317.943	6684.09	4625.87	3096.34	4176.95	5082.44	4552.82	2941.22	4062.18
1220	2573.71	1722.42	2304.19	1401.17	1487.97	355.535	6081.52	4909.44	3255.9	4389.8	5247.34	5026.75	2745.3	4074.93
1520	2552.75	1985.21	2778.03	1357.67	1725.22	289.64	6956.83	5024.1	3059.42	4517.75	5770.46	5002.84	2887.86	3947.38
1820	2961.34	2075.48	3303.89	1361.61	1942.76	317.266	6320.72	4996.53	2769.87	4518.23	5394.19	5383.54	2869.72	3987.58
2120	3557.83	2073.72	3128.63	1626.8	2781.14	272.491	7606.58	5044.17	2808.86	4512.36	5292.14	5384.49	2872.05	3835.17
2420	3254.57	2371.09	3235.97	2312.96	2018.93	309.476	6924.16	4736.17	2981.47	4743.19	5505.22	5255.04	2788.02	3849.72
2720	3560.67	2708.36	3405.91	2331.23	2486.83	326.596	6785.74	4686.57	3470.88	4790.19	5081.7	5269.29	2931.41	3679.55
3020	3747.92	3151.57	3306.76	2632.38	2489.23	311.483	6374.08	4349.96	3290.49	4788.78	4443.81	5043.01	2736.58	3402.09
3320	3301.2	2901.21	3620.93	2641.51	2101.24	376.812	6169.89	4819.03	3576.17	5286.79	5095.39	4781.93	2747.13	3851.21
3620	3919.84	2896.16	3694.24	2854.57	2152.73	319.313	5932.79	4416.21	3509.45	5240.83	4747.59	4874.24	2796.53	3736.46
3920	3840.39	3219.96	3651.93	3003.6	2635.72	351.969	6094.76	4977.21	3551.31	4820.42	4917.41	4669.95	2594.87	3597.4
4220	4091.5	3214.22	3598.65	2614.05	2491.49	542.57	6686.01	4871.1	3090.74	4976.35	5324.18	4988.25	2637.23	3676.3
4520	4048.84	3276.42	3885.32	2365.53	2516.83	353.8	6534.78	5034.64	3224.64	4824.58	5785.05	4834.29	2569.01	3461.49
time
0	5186.58	7067.71	8508.04	4353.75	3697.53	8194.42	4189.61	3792.9	4094.02	5067.97	3662.33	2975.44	4640.72
30	5233.01	7444	8696.76	4071.34	3428.08	8005.41	4147.62	3958.53	4085.74	4807.75	3519.41	3008.06	4971.37
60	5089.22	7261.38	8284.6	4164.21	3673.25	7713.68	4403.11	3916.92	4026.66	4467.91	3636.52	2918.28	4460
90	5010.6	7168.5	7991.47	4202.92	3478.39	6911.97	4228.45	3823.65	4287.87	4577.05	3628.51	2859.1	4759.96
120	5048.21	7247.82	7843.1	4144.03	3970.76	7164.01	3987.69	3764.53	4108.48	4454.68	3871.33	2630.98	4459.15
130	161.514	248.529	491.627	198.879	104.127	6813.48	3980.98	3315.78	4006.23	4353.61	3527.03	2665.43	4375.07
160	306.746	537.463	827.793	338.043	150.974	6624.73	3959.02	3395.2	4019.06	4220.12	3430.16	2685.33	4090.02
190	614.001	685.654	996.066	480.599	343.519	6854.91	3950.21	3271.13	4198	4653.09	3503.89	2501.43	4210.43
220	727.427	649.141	981.184	500.235	350.904	6822.07	3980.57	3177.11	4128	4669.29	3719.61	2661.47	3931.67
250	757.534	706.621	1515.38	545.781	373.531	6454.51	4006.79	3176.69	3874.14	4565.41	3737.89	2745.06	3990.6
280	739.142	620.42	1337.15	450.926	340.308	6407.37	3628.16	3190.09	4174.39	4451.16	3790.17	2662.86	3791.11
310	873.454	632.063	1178.6	506.688	319.434	6318.75	3714.97	3099.87	3767	4263.73	3683.98	2442.28	3908.39
320	834.696	598.547	1145.11	559.066	315.592	6059.66	3571.91	3023.13	3811.53	4104.42	3716.14	2323.43	3935.3
620	1666.93	929.162	1607.69	970.66	839.345	6875.67	4410.29	3199.33	4609.33	4354.68	3988.01	2642.62	3471.57
920	1962.56	1187.57	1895.71	782.995	988.159	6366.15	4307.93	2778.4	3859.01	4764.5	4234.88	2623.28	3744.24
1220	2218.18	1366.89	1948.66	1045.64	1132.44	5725.98	4553.9	2900.37	4034.26	4891.8	4671.22	2389.77	3719.39
1520	2263.11	1695.57	2488.39	1068.03	1435.58	6667.19	4734.46	2769.78	4228.11	5480.82	4713.19	2598.22	3657.74
1820	2644.07	1758.21	2986.62	1044.34	1625.5	6003.45	4679.26	2452.61	4200.97	5076.92	5066.28	2552.45	3670.31
2120	3285.34	1801.23	2856.14	1354.31	2508.65	7334.09	4771.68	2536.37	4239.87	5019.64	5112	2599.56	3562.68
2420	2945.09	2061.62	2926.49	2003.49	1709.45	6614.68	4426.69	2672	4433.72	5195.75	4945.56	2478.54	3540.24
2720	3234.07	2381.76	3079.32	2004.63	2160.23	6459.15	4359.98	3144.28	4463.6	4755.1	4942.7	2604.81	3352.96
3020	3436.43	2840.09	2995.27	2320.9	2177.75	6062.6	4038.47	2979.01	4477.3	4132.33	4731.53	2425.1	3090.6
3320	2924.38	2524.4	3244.11	2264.7	1724.43	5793.08	4442.22	3199.36	4909.98	4718.58	4405.11	2370.32	3474.4
3620	3600.53	2576.85	3374.93	2535.25	1833.41	5613.48	4096.9	3190.13	4921.52	4428.27	4554.93	2477.22	3417.15
3920	3488.42	2867.99	3299.96	2651.63	2283.76	5742.79	4625.24	3199.34	4468.45	4565.44	4317.98	2242.9	3245.43
4220	3548.93	2671.65	3056.08	2071.48	1948.92	6143.44	4328.53	2548.17	4433.78	4781.61	4445.68	2094.66	3133.73
4520	3695.04	2922.62	3531.52	2011.73	2163.03	6180.98	4680.84	2870.84	4470.78	5431.24	4480.49	2215.21	3107.69
	AVERAGE OF PREBLEACH
	5113.52	7237.88	8264.79	4187.25	3649.6	7597.89	4191.3	3851.31	4120.56	4675.07	3663.62	2878.37	4658.24
NORMALIZED DATA
time	b1	b2	b3	b4	b5	c1	c2	c3	c4	c5	c6	c7	c8	Average of controls
120	1	1	1	1	1	1	1	1	1	1	1	1	1	1
130	0.0315857	0.0343373	0.0594845	0.0474963	0.028531	0.896759	0.94982	0.860949	0.972256	0.931239	0.962718	0.926021	0.93921	0.929871
160	0.0599872	0.0742569	0.100159	0.0807315	0.0413672	0.871917	0.94458	0.88157	0.975368	0.902686	0.936276	0.932935	0.878018	0.915419
190	0.120074	0.0947313	0.120519	0.114777	0.094125	0.902212	0.942479	0.849357	1.01879	0.995298	0.956402	0.869044	0.903866	0.929682
220	0.142256	0.0896866	0.118719	0.119466	0.0961485	0.897889	0.949722	0.824944	1.00181	0.998763	1.01528	0.924644	0.844025	0.932135
250	0.148143	0.0976281	0.183353	0.130344	0.102348	0.849513	0.955978	0.824834	0.940199	0.976543	1.02027	0.953687	0.856674	0.922212
280	0.144547	0.0857184	0.161788	0.10769	0.0932452	0.843309	0.865642	0.828314	1.01307	0.952105	1.03454	0.925126	0.813851	0.909494
310	0.170813	0.0873271	0.142605	0.121007	0.0875257	0.831645	0.886354	0.804889	0.914198	0.912014	1.00556	0.848493	0.839027	0.880272
320	0.163233	0.0826964	0.138553	0.133516	0.0864729	0.797545	0.85222	0.784963	0.925004	0.877937	1.01434	0.807201	0.844804	0.863001
620	0.325985	0.128375	0.194523	0.231813	0.229982	0.904944	1.05225	0.830713	1.11862	0.931467	1.08854	0.918095	0.745253	0.948736
920	0.383799	0.164077	0.229372	0.186995	0.270758	0.837883	1.02783	0.721417	0.936527	1.01913	1.15593	0.911375	0.803788	0.926734
1220	0.433787	0.188852	0.235778	0.249719	0.31029	0.753627	1.08651	0.753087	0.979058	1.04636	1.27503	0.83025	0.798455	0.940297
1520	0.442573	0.234263	0.301084	0.255068	0.393352	0.877505	1.12959	0.719179	1.0261	1.17235	1.28649	0.902668	0.785218	0.987388
1820	0.517075	0.242918	0.361367	0.24941	0.44539	0.790147	1.11642	0.636825	1.01951	1.08596	1.38286	0.886769	0.787918	0.963302
2120	0.64248	0.248861	0.345579	0.323437	0.687375	0.965279	1.13847	0.658574	1.02896	1.0737	1.39534	0.903135	0.764813	0.991034
2420	0.575941	0.284837	0.354092	0.478473	0.468395	0.870594	1.05616	0.69379	1.076	1.11137	1.34991	0.861091	0.759995	0.972365
2720	0.632455	0.329069	0.372583	0.478747	0.591909	0.850123	1.04025	0.816419	1.08325	1.01712	1.34913	0.90496	0.71979	0.97263
3020	0.672029	0.392393	0.362414	0.554277	0.596709	0.797931	0.963538	0.773506	1.08658	0.883907	1.29149	0.842525	0.66347	0.912868
3320	0.571892	0.348776	0.392522	0.540857	0.472499	0.762459	1.05987	0.83072	1.19158	1.00931	1.20239	0.823493	0.74586	0.95321
3620	0.704119	0.356022	0.40835	0.60547	0.50236	0.73882	0.977477	0.828325	1.19438	0.947209	1.24329	0.860632	0.73357	0.940463
3920	0.682195	0.396247	0.399279	0.633263	0.625754	0.75584	1.10353	0.830716	1.08443	0.976549	1.17861	0.779226	0.696707	0.925702
4220	0.694029	0.369121	0.369771	0.494712	0.534009	0.808571	1.03274	0.661639	1.07601	1.02279	1.21347	0.727722	0.672728	0.901959
4520	0.722601	0.403795	0.427298	0.480441	0.592675	0.813513	1.1168	0.745419	1.08499	1.16175	1.22297	0.769606	0.667138	0.947773
CORRECTED DATA
Time	b1	b2	b3	b4	b5
120	1	1	1	1	1
130	0.0339678	0.0369269	0.0639707	0.0510784	0.0306828
160	0.0655298	0.081118	0.109413	0.0881908	0.0451894
190	0.129156	0.101896	0.129635	0.123458	0.101244
220	0.152613	0.0962164	0.127362	0.128164	0.103149
250	0.160639	0.105863	0.198819	0.141338	0.110981
280	0.158931	0.0942485	0.177888	0.118407	0.102524
310	0.194045	0.0992046	0.162001	0.137466	0.0994302
320	0.189146	0.0958242	0.160547	0.154712	0.1002
620	0.343599	0.135312	0.205033	0.244339	0.242409
920	0.414141	0.177049	0.247506	0.201778	0.292163
1220	0.461329	0.200843	0.250749	0.265575	0.329992
1520	0.448226	0.237256	0.30493	0.258326	0.398377
1820	0.536774	0.252173	0.375134	0.258911	0.462358
2120	0.648293	0.251113	0.348706	0.326363	0.693594
2420	0.59231	0.292933	0.364155	0.492072	0.481707
2720	0.650252	0.338329	0.383067	0.492219	0.608566
3020	0.736173	0.429846	0.397006	0.607182	0.653664
3320	0.599964	0.365896	0.41179	0.567405	0.495692
3620	0.748694	0.378561	0.434202	0.6438	0.534162
3920	0.73695	0.428051	0.431326	0.68409	0.675979
4220	0.769468	0.409243	0.409965	0.548486	0.592055
4520	0.76242	0.426047	0.450844	0.506916	0.625335
	Normalize the bouton fluorescent right after bleaching to 0	Normalize the bouton fluorescent right after bleaching to 0
Recovery Time_(sec)
0	0	0	0	0	0
30	0.0326718	0.0458855	0.0485483	0.0391101	0.0149658
60	0.0985353	0.0674607	0.0701519	0.0762758	0.0727951
90	0.122817	0.0615628	0.0677237	0.0812351	0.0747598
120	0.131125	0.0715793	0.144064	0.095118	0.0828403
150	0.129357	0.0595195	0.121703	0.0709525	0.0741155
180	0.165706	0.0646656	0.10473	0.0910375	0.0709236
190	0.160634	0.0611556	0.103177	0.109212	0.071718
490	0.320519	0.102157	0.150703	0.203664	0.218429
790	0.393541	0.145495	0.196079	0.158812	0.269758
1090	0.442389	0.170201	0.199543	0.226042	0.308783
1390	0.428824	0.20801	0.257427	0.218404	0.379333
1690	0.520486	0.223499	0.332429	0.21902	0.445339
1990	0.635926	0.222398	0.304195	0.290103	0.683895
2290	0.577975	0.265822	0.3207	0.464731	0.465301
2590	0.637954	0.312959	0.340905	0.464887	0.596175
2890	0.726896	0.407985	0.355795	0.586038	0.642701
3190	0.585898	0.341582	0.37159	0.54412	0.479729
3490	0.739857	0.354733	0.395534	0.624626	0.519417
3790	0.7277	0.406121	0.392461	0.667086	0.665722
4090	0.761362	0.386592	0.36964	0.524182	0.579142
4390	0.754066	0.40404	0.413313	0.480374	0.613475

## Sheet: KO 12nov F1
time	b1	b2	b3	b4	b5	background	c1	c2	c3	c4	c5	c6	c7	c8
0	7182.17	8485.49	7422.99	5011	6317.33	124.64	4533.41	4432.9	7343.77	5308.99	11656	3545.68	11602.8	6757.75
30	7563.84	8496.89	7308.52	4997.65	6500.02	117.327	4378.59	4450.62	7573.03	5119.4	11643.4	3526.52	10839.7	7025.6
60	6983.83	8525.86	6806.52	4832.71	6323.98	124.775	4495.45	4435.45	7308.32	4984.33	11052.3	3423.37	10704.8	6894.94
90	6910.14	8595.03	7371.48	4799.87	5608.7	112.133	4154.38	4391.37	7096.77	5024.47	10981.3	3500.52	10350.8	6881.56
120	7632.87	8209.83	7013.91	4039.54	5742.94	120.64	4080.77	3989.53	6833.92	4801.66	10599	3425.14	10477.1	6487.96
130	714.873	811.024	519.487	743.909	515.596	124.358	4061	3687.64	6816.81	4586.89	10740.1	3297.88	10189.8	6386.13
160	979.164	1164.98	950.499	913.756	709.871	115.123	4040.97	3831.76	6545.53	4679.75	10927	3246.19	10427.1	6184.61
190	1446.31	1372.67	1051.17	987.547	780.972	116.554	4146.86	3818.58	6598.67	4555.46	11187.3	3213.47	10190.1	6313.42
220	1533.1	1460.16	1160.18	969.504	801.175	126.998	4247.66	3821.83	6370.56	4487.4	10791.1	3211.98	10526	6315.48
250	1585.87	1491.87	1109.06	1104.42	834.278	113.488	3839.66	3554.09	6524.47	4319.04	10300.5	3128.05	10054.5	6029.83
280	1607.88	1731.15	1189.9	1131.29	838.127	118.509	3693.01	3659.88	6187.66	4208.91	10281.1	3035.77	10056.7	6070.28
310	1668.06	1860.85	1249.22	1240.23	901.412	111.043	3543.4	3888.87	6045.83	3909.97	10437.1	3070.84	10158	6044.93
320	1634.39	1796.38	1169.57	1199.45	857.677	111.756	3284.33	3724.92	6135.25	3943.71	10054.8	2944.2	9701.59	6030.16
620	2539.78	2279.87	1590.12	1464.01	1888.32	124.297	3151.71	3873.87	6397.13	4548.19	10510.1	3111.85	10537.4	6252.2
920	2754.42	3185.74	1666.3	1661.37	1969.93	118.297	3736.74	4129.4	7476.18	4532.05	10211	3455.41	10652.8	6749.28
1220	2569.3	3195.82	1867.18	1761.58	2331.24	120.312	3864.98	4250.45	7853.12	4440.97	10416.4	3987.95	11442.7	6930.08
1520	2632.26	3713.61	1763.52	1728.24	2501.63	117.362	4370.45	4251.21	7142.13	4576.91	9664.51	3806.11	11303.7	6869.6
1820	2857.42	3899.51	1897.43	1766.04	2596.38	122.933	4096.46	3669.82	7388.65	4545.57	10620.2	3907.31	11317.5	6231.76
2120	2778.51	3595.27	1998.52	1956.02	2637.44	121.742	3706.27	3760.17	6447.79	4714.06	10916.9	3297.25	11987.3	7071.81
2420	2725.4	4319.03	2183.11	1568.84	2651.68	128.544	3876.33	3770.99	6700.17	4932.24	9913.18	3544.42	11898.7	7197.77
2720	3066.14	4322.96	2167.72	2689.37	2899.43	129.59	4156.25	3961.76	6224.32	4967.6	10791.6	3471.67	11484.4	7101.19
3020	3061.28	4383.56	2098.16	2584.35	2815.05	130.931	4191.61	4091.89	5997.46	4892.07	10332.6	3487.96	12229.6	7760.07
3320	3564.07	4601.81	2093.34	3200.06	3478.29	134.557	3915.3	3566.73	5900.05	4976.84	10705.1	3299.04	12466.3	6888.89
3620	3663.92	4551.91	2000.81	2982.34	3134.21	134.501	4157.06	3965.09	5715.1	5161.44	10150.9	3287.09	12020.7	7418.43
3920	3830.48	5119.85	2033.69	3265.18	3191.34	134.676	4274.61	4318.77	5221.03	4893.15	10570	3386.34	12159.7	7057.62
4220	4362.12	5272.87	2007.14	3299.62	3278.98	129.8	4103.49	3633.63	5604.01	4428.23	11012.9	2919.54	11544.8	7201.91
4520	4778.57	5398.96	2292.57	3415.07	3255.58	139.306	4554.98	3645.19	5420.06	4863.66	12117.4	3474.86	11838.6	7170.43
time
0	7057.53	8360.85	7298.35	4886.36	6192.69	4408.77	4308.26	7219.13	5184.35	11531.4	3421.04	11478.2	6633.11
30	7446.51	8379.56	7191.19	4880.32	6382.69	4261.26	4333.29	7455.71	5002.07	11526.1	3409.19	10722.4	6908.27
60	6859.05	8401.09	6681.74	4707.94	6199.21	4370.68	4310.67	7183.54	4859.55	10927.5	3298.59	10580	6770.16
90	6798	8482.9	7259.35	4687.74	5496.57	4042.24	4279.24	6984.64	4912.34	10869.1	3388.39	10238.7	6769.43
120	7512.23	8089.19	6893.27	3918.9	5622.3	3960.13	3868.89	6713.28	4681.02	10478.4	3304.5	10356.5	6367.32
130	590.515	686.666	395.129	619.551	391.238	3936.65	3563.28	6692.45	4462.53	10615.8	3173.52	10065.4	6261.77
160	864.041	1049.85	835.376	798.633	594.748	3925.84	3716.63	6430.41	4564.63	10811.9	3131.07	10312	6069.49
190	1329.75	1256.11	934.618	870.993	664.418	4030.31	3702.03	6482.12	4438.91	11070.7	3096.92	10073.5	6196.86
220	1406.11	1333.16	1033.18	842.506	674.177	4120.66	3694.83	6243.56	4360.4	10664.2	3084.98	10399	6188.48
250	1472.38	1378.38	995.574	990.935	720.79	3726.17	3440.6	6410.98	4205.55	10187	3014.56	9941.04	5916.34
280	1489.37	1612.64	1071.39	1012.78	719.618	3574.51	3541.37	6069.15	4090.41	10162.6	2917.26	9938.18	5951.77
310	1557.01	1749.8	1138.18	1129.18	790.369	3432.35	3777.83	5934.79	3798.93	10326	2959.79	10047	5933.89
320	1522.63	1684.62	1057.82	1087.7	745.921	3172.58	3613.17	6023.49	3831.95	9943.09	2832.45	9589.83	5918.4
620	2415.49	2155.58	1465.83	1339.71	1764.02	3027.41	3749.57	6272.84	4423.9	10385.8	2987.55	10413.1	6127.9
920	2636.12	3067.45	1548	1543.07	1851.63	3618.44	4011.1	7357.88	4413.75	10092.8	3337.11	10534.5	6630.99
1220	2448.99	3075.51	1746.87	1641.27	2210.93	3744.67	4130.14	7732.8	4320.66	10296.1	3867.64	11322.4	6809.77
1520	2514.89	3596.25	1646.16	1610.88	2384.27	4253.09	4133.85	7024.77	4459.55	9547.15	3688.75	11186.3	6752.23
1820	2734.49	3776.58	1774.5	1643.11	2473.45	3973.52	3546.89	7265.72	4422.64	10497.3	3784.38	11194.6	6108.82
2120	2656.76	3473.53	1876.78	1834.27	2515.7	3584.53	3638.43	6326.05	4592.32	10795.1	3175.51	11865.5	6950.07
2420	2596.85	4190.49	2054.56	1440.29	2523.14	3747.79	3642.45	6571.62	4803.7	9784.63	3415.88	11770.2	7069.23
2720	2936.55	4193.37	2038.13	2559.78	2769.84	4026.66	3832.17	6094.73	4838.01	10662	3342.08	11354.8	6971.6
3020	2930.35	4252.63	1967.23	2453.42	2684.12	4060.68	3960.96	5866.53	4761.14	10201.6	3357.03	12098.7	7629.14
3320	3429.52	4467.25	1958.78	3065.51	3343.73	3780.74	3432.18	5765.49	4842.28	10570.6	3164.49	12331.7	6754.34
3620	3529.42	4417.41	1866.31	2847.84	2999.71	4022.56	3830.59	5580.6	5026.93	10016.4	3152.59	11886.2	7283.92
3920	3695.81	4985.17	1899.01	3130.51	3056.66	4139.94	4184.09	5086.35	4758.47	10435.4	3251.67	12025	6922.95
4220	4232.32	5143.07	1877.34	3169.82	3149.18	3973.69	3503.83	5474.21	4298.43	10883.1	2789.74	11415	7072.11
4520	4639.26	5259.65	2153.26	3275.76	3116.28	4415.67	3505.88	5280.76	4724.35	11978.1	3335.55	11699.2	7031.12
	AVERAGE OF PREBLEACH
	7134.66	8342.72	7064.78	4616.25	5978.69	4208.62	4220.07	7111.26	4927.87	11066.5	3364.34	10675.1	6689.66
NORMALIZED DATA
time	b1	b2	b3	b4	b5	c1	c2	c3	c4	c5	c6	c7	c8	Average of controls
120	1	1	1	1	1	1	1	1	1	1	1	1	1	1
130	0.082767	0.0823072	0.0559294	0.134211	0.0654387	0.935378	0.844366	0.941106	0.905571	0.959272	0.94328	0.942885	0.936037	0.925987
160	0.121105	0.125841	0.118245	0.173005	0.0994779	0.932812	0.880704	0.904257	0.92629	0.976993	0.930663	0.965978	0.907294	0.928124
190	0.186379	0.150564	0.132293	0.18868	0.111131	0.957633	0.877243	0.911529	0.900777	1.00038	0.920512	0.943643	0.926335	0.929757
220	0.197081	0.159799	0.146244	0.182509	0.112763	0.979102	0.875538	0.877982	0.884846	0.963643	0.916964	0.974129	0.925081	0.924661
250	0.20637	0.16522	0.140921	0.214662	0.12056	0.885367	0.815295	0.901526	0.853423	0.920525	0.896032	0.931233	0.884401	0.885975
280	0.208751	0.193299	0.151652	0.219394	0.120364	0.849331	0.839174	0.853457	0.830056	0.91832	0.867111	0.930965	0.889698	0.872264
310	0.218232	0.20974	0.161106	0.244611	0.132198	0.815554	0.895206	0.834562	0.770908	0.93309	0.879754	0.941159	0.887024	0.869657
320	0.213414	0.201927	0.149731	0.235623	0.124763	0.753829	0.856186	0.847036	0.777609	0.898486	0.841902	0.898333	0.88471	0.844761
620	0.338556	0.258378	0.207484	0.290216	0.295052	0.719337	0.888509	0.882099	0.897731	0.938494	0.888005	0.975455	0.916026	0.888207
920	0.36948	0.36768	0.219115	0.334269	0.309706	0.85977	0.950481	1.03468	0.895671	0.91201	0.991907	0.986823	0.991229	0.952821
1220	0.343253	0.368646	0.247265	0.355542	0.369802	0.889763	0.97869	1.0874	0.87678	0.930383	1.1496	1.06063	1.01795	0.998901
1520	0.352489	0.431064	0.233009	0.348958	0.398795	1.01057	0.979568	0.987837	0.904966	0.862708	1.09643	1.04789	1.00935	0.987414
1820	0.383268	0.45268	0.251175	0.355939	0.413711	0.94414	0.840481	1.02172	0.897475	0.948567	1.12485	1.04866	0.913174	0.967383
2120	0.372374	0.416355	0.265652	0.397351	0.420778	0.851711	0.862173	0.889582	0.931908	0.97548	0.943871	1.11151	1.03893	0.950645
2420	0.363977	0.502293	0.290817	0.312004	0.422022	0.890503	0.863126	0.924115	0.974804	0.884167	1.01532	1.10258	1.05674	0.963919
2720	0.411589	0.502639	0.288491	0.554515	0.463286	0.956765	0.908083	0.857054	0.981766	0.963448	0.993381	1.06367	1.04215	0.970789
3020	0.41072	0.509741	0.278456	0.531475	0.448948	0.964849	0.938601	0.824963	0.966167	0.921849	0.997825	1.13335	1.14044	0.986006
3320	0.480683	0.535467	0.27726	0.664068	0.559274	0.898334	0.813299	0.810756	0.982633	0.955187	0.940596	1.15518	1.00967	0.945707
3620	0.494687	0.529493	0.264171	0.616916	0.501734	0.955793	0.907707	0.784756	1.0201	0.905109	0.93706	1.11344	1.08883	0.964101
3920	0.518007	0.597548	0.2688	0.678149	0.51126	0.983682	0.991475	0.715253	0.965625	0.94297	0.966508	1.12645	1.03487	0.965855
4220	0.593206	0.616475	0.265732	0.686665	0.526735	0.944179	0.830277	0.769795	0.872271	0.983432	0.829208	1.06931	1.05717	0.919455
4520	0.650242	0.630449	0.304788	0.709616	0.521231	1.0492	0.830764	0.742591	0.958702	1.08238	0.991442	1.09593	1.05104	0.975256
CORRECTED DATA
Time	b1	b2	b3	b4	b5
120	1	1	1	1	1
130	0.0893825	0.088886	0.0603998	0.144938	0.0706692
160	0.130483	0.135586	0.127402	0.186403	0.107182
190	0.20046	0.161939	0.142287	0.202934	0.119527
220	0.213139	0.172819	0.15816	0.197379	0.121951
250	0.23293	0.186484	0.159057	0.242289	0.136076
280	0.239321	0.221607	0.17386	0.251523	0.13799
310	0.250941	0.241176	0.185253	0.281273	0.152011
320	0.252632	0.239035	0.177247	0.278923	0.14769
620	0.381168	0.290899	0.233598	0.326744	0.332188
920	0.387775	0.385885	0.229964	0.35082	0.32504
1220	0.34363	0.369052	0.247537	0.355933	0.370209
1520	0.356982	0.436559	0.235979	0.353406	0.403878
1820	0.396191	0.467942	0.259644	0.36794	0.42766
2120	0.391707	0.437971	0.279444	0.417981	0.442624
2420	0.377601	0.521094	0.301703	0.323683	0.437819
2720	0.423974	0.517763	0.297172	0.5712	0.477226
3020	0.416549	0.516976	0.282408	0.539018	0.45532
3320	0.50828	0.566208	0.293178	0.702192	0.591383
3620	0.513107	0.549209	0.274008	0.639887	0.520416
3920	0.53632	0.618673	0.278302	0.702123	0.529334
4220	0.645171	0.670478	0.28901	0.746817	0.572877
4520	0.66674	0.646444	0.312521	0.72762	0.534455
	Normalize the bouton fluorescent right after bleaching to 0
Recovery Time_(sec)
0	0	0	0	0	0
30	0.045135	0.0512562	0.0713096	0.0484928	0.0392891
60	0.12198	0.0801802	0.0871514	0.067827	0.0525731
90	0.135904	0.0921217	0.104044	0.06133	0.0551814
120	0.157638	0.107119	0.104999	0.113853	0.0703804
150	0.164656	0.145668	0.120754	0.124652	0.0724402
180	0.177416	0.167147	0.132879	0.159444	0.0875276
190	0.179273	0.164797	0.124358	0.156696	0.0828782
490	0.320426	0.221721	0.184332	0.212623	0.281406
790	0.327682	0.325974	0.180465	0.24078	0.273714
1090	0.279204	0.307498	0.199167	0.24676	0.322318
1390	0.293866	0.381591	0.186866	0.243805	0.358547
1690	0.336923	0.416036	0.212052	0.260803	0.384137
1990	0.331999	0.383141	0.233125	0.319325	0.400239
2290	0.316509	0.474374	0.256815	0.209043	0.395069
2590	0.367433	0.470717	0.251993	0.498516	0.437473
2890	0.35928	0.469854	0.23628	0.460879	0.413901
3190	0.460014	0.523889	0.247742	0.651712	0.56031
3490	0.465315	0.505231	0.227339	0.578846	0.483947
3790	0.490807	0.581471	0.23191	0.651631	0.493543
4090	0.610343	0.638331	0.243306	0.703901	0.540397
4390	0.634028	0.611952	0.268328	0.681449	0.499053

## Sheet: KO 12nov F2
time	b1	b2	b3	b4	b5	background	c1	c2	c3	c4	c5	c6	c7	c8
0	5329.55	4615	6824.99	4990.19	10413.5	123.635	4169.45	6164.05	5767.6	5821.7	5121.88	11356.5	8401.64	4843.03
30	5519.02	4673.97	6433.99	5024.93	9975.21	127.559	3963.62	7079.16	6203.4	5462.18	4981.56	11120.7	8796.66	4553.53
60	5303.78	4484.21	5881	4579.08	10211.5	128.974	3941.8	6276.18	5568.05	5464.65	4470.63	10322.4	8475.7	4157.61
90	5207.34	4485.35	5921.28	4460.42	9759.27	119.257	4053.31	5690.63	5385.69	5732.28	4369.61	10531.8	8331.75	4244.27
120	5482.12	3894.32	5639.68	4409.44	9048.8	125.389	4359.08	5347.82	5282.21	5381.31	4605.25	10137.1	8687.91	4342.39
130	384.851	391.532	655.619	396.844	754.251	126.174	3882.87	5106.74	5144.41	5272.95	4379.65	9673.2	7996.89	4093.23
160	893.255	510.626	1015.72	705.919	1108.24	124.959	4225.03	5049.4	4947.36	5050.23	4430.91	9771.75	8170.84	3766.54
190	947.669	694.376	1192.11	906.626	1309.54	128.622	3632.14	4719.86	5075.47	5208.78	4491.02	9786.78	8076.81	3702.88
220	944.494	765.782	1257.43	1036.96	1375.9	142.145	3609.32	4713.92	5292.05	5011.13	4531.79	9413.33	7789.9	3711.99
250	1032.94	735.785	1387.15	1089.53	1392.45	131.653	3344.4	4859.68	4837.84	5280.23	4067.13	9902.02	7874.53	4049.71
280	1183.69	751.637	1440.39	1199.98	1556.83	132.515	3398.22	4576.02	5017	5251.22	3827.81	9608.28	7482.46	3702.71
310	1266.81	820.503	1619.96	1330.65	1670.81	133.728	3211.95	4854.88	4716.77	4849.89	4007.68	8962.56	7620.77	3684.47
320	1117.52	745.976	1572.81	1278.58	1686.33	139.305	3308.5	4455.62	4895.9	4831.28	3850.81	8938.71	7269.49	3492.76
620	1729.17	1071.25	2076.61	1683.23	2563.72	127.855	4223.99	5583.62	5246.2	5522.15	4544.58	9694.99	7209.29	3797.81
920	1430.51	1426.65	2501.26	2542.07	3400.01	123.623	5384.44	5879.47	5466.11	5607.92	4340.96	8380.25	6596.11	3884.8
1220	1669.93	1800.75	3041.73	3032.18	3639.6	127.332	5070.36	5976.77	5595.87	5377.73	4296.09	9911.65	7640.61	4283.2
1520	2099.85	1844.36	3212.93	2853.93	3629.17	120.001	4663.84	5790.48	6077.42	6068.71	3702.24	10037.2	7480.17	4282
1820	2422.18	2120.75	3093.54	3329.13	3805.25	128.542	4491.56	5495.59	6078.23	5649.3	3849.34	10144.7	8205.98	4518.09
2120	2402.92	2231.39	2486.22	2756.95	5032.47	128.99	4758.59	5395.33	5658.23	5613.29	3630.15	11070.6	8462.9	3931.95
2420	2471.49	1955.24	3946.22	2987.91	5579.55	120.601	4550.72	5939.49	5996.01	5966.16	3596.67	10332.8	8670.66	4133.93
2720	2877.91	2238.02	3679.12	2871.2	5080.43	128.131	4574.47	5967.8	5960.98	5890.18	3543.08	11210	7650.46	4125.18
3020	3072.59	2268.17	3815.09	4026.64	4665.29	110.177	4277.12	5762.48	6858.2	5838.83	3680.68	11086.7	8045.51	4054.13
3320	3200.98	2433.95	3889.49	3713.18	5305.66	127.782	4559.94	6220.34	5599.47	5750.96	4039.82	10630.9	8785.09	4408.46
3620	3274.87	2575.11	3393.1	3535.89	5495.08	125.731	4199.15	6070.05	5305.4	6048.73	4108.84	9936.55	7656.2	4251.34
3920	3427.15	2638.79	3825.12	3839.9	5964	119.793	4243.01	6097.49	5322.74	6064.44	3665.16	10652.6	7597.81	4238.28
4220	3244.13	3402.47	3352.87	3876.91	6378.06	110.32	4614.89	6260.92	5930.39	6230.01	3600.45	10696.6	7645.31	4242.33
4520	3207.31	3009.29	2662.9	3521.32	6713.79	116.626	4134.78	6869.79	6407.91	6032.15	3765.5	11144.2	6827.85	3831.68
time
0	5205.91	4491.37	6701.36	4866.56	10289.8	4045.82	6040.41	5643.96	5698.07	4998.25	11232.8	8278	4719.4
30	5391.46	4546.41	6306.43	4897.37	9847.65	3836.06	6951.6	6075.84	5334.62	4854	10993.2	8669.1	4425.97
60	5174.81	4355.23	5752.03	4450.11	10082.5	3812.82	6147.2	5439.07	5335.68	4341.65	10193.4	8346.73	4028.63
90	5088.08	4366.09	5802.02	4341.16	9640.01	3934.05	5571.37	5266.44	5613.02	4250.35	10412.5	8212.49	4125.02
120	5356.73	3768.93	5514.29	4284.05	8923.41	4233.69	5222.43	5156.82	5255.92	4479.86	10011.7	8562.52	4217
130	258.677	265.358	529.445	270.67	628.077	3756.69	4980.56	5018.24	5146.78	4253.47	9547.03	7870.71	3967.06
160	768.296	385.667	890.757	580.96	983.283	4100.07	4924.44	4822.4	4925.27	4305.95	9646.8	8045.88	3641.58
190	819.047	565.754	1063.49	778.004	1180.91	3503.52	4591.24	4946.85	5080.16	4362.4	9658.16	7948.19	3574.26
220	802.349	623.637	1115.29	894.818	1233.76	3467.18	4571.77	5149.9	4868.99	4389.64	9271.18	7647.76	3569.84
250	901.288	604.132	1255.5	957.879	1260.8	3212.74	4728.03	4706.19	5148.58	3935.48	9770.36	7742.88	3918.06
280	1051.18	619.122	1307.87	1067.47	1424.32	3265.7	4443.51	4884.48	5118.71	3695.29	9475.76	7349.95	3570.19
310	1133.09	686.775	1486.23	1196.92	1537.08	3078.22	4721.16	4583.04	4716.16	3873.95	8828.84	7487.04	3550.74
320	978.219	606.671	1433.51	1139.28	1547.02	3169.19	4316.32	4756.6	4691.98	3711.5	8799.41	7130.18	3353.45
620	1601.32	943.399	1948.76	1555.37	2435.86	4096.14	5455.77	5118.35	5394.29	4416.72	9567.13	7081.44	3669.96
920	1306.88	1303.03	2377.64	2418.45	3276.38	5260.81	5755.84	5342.48	5484.3	4217.34	8256.63	6472.49	3761.18
1220	1542.6	1673.42	2914.4	2904.85	3512.27	4943.02	5849.44	5468.54	5250.4	4168.76	9784.32	7513.28	4155.87
1520	1979.85	1724.36	3092.92	2733.93	3509.17	4543.84	5670.48	5957.42	5948.7	3582.24	9917.19	7360.17	4162
1820	2293.64	1992.21	2965	3200.59	3676.71	4363.02	5367.05	5949.69	5520.75	3720.8	10016.1	8077.44	4389.55
2120	2273.93	2102.4	2357.23	2627.96	4903.48	4629.6	5266.34	5529.24	5484.3	3501.16	10941.6	8333.91	3802.95
2420	2350.88	1834.64	3825.62	2867.3	5458.95	4430.12	5818.89	5875.4	5845.56	3476.07	10212.2	8550.06	4013.33
2720	2749.77	2109.89	3550.99	2743.07	4952.29	4446.34	5839.67	5832.85	5762.05	3414.95	11081.9	7522.33	3997.05
3020	2962.41	2157.99	3704.92	3916.46	4555.11	4166.94	5652.3	6748.02	5728.66	3570.5	10976.5	7935.34	3943.95
3320	3073.19	2306.17	3761.71	3585.4	5177.88	4432.16	6092.56	5471.69	5623.18	3912.03	10503.1	8657.31	4280.68
3620	3149.14	2449.38	3267.37	3410.16	5369.35	4073.42	5944.32	5179.67	5922.99	3983.11	9810.82	7530.47	4125.61
3920	3307.36	2518.99	3705.33	3720.11	5844.21	4123.21	5977.7	5202.95	5944.64	3545.37	10532.8	7478.02	4118.49
4220	3133.81	3292.15	3242.55	3766.59	6267.74	4504.57	6150.6	5820.07	6119.69	3490.13	10586.3	7534.99	4132.01
4520	3090.68	2892.66	2546.28	3404.7	6597.17	4018.15	6753.16	6291.29	5915.52	3648.88	11027.6	6711.23	3715.05
	AVERAGE OF PREBLEACH
	5243.4	4305.61	6015.22	4567.85	9756.68	3972.49	5986.6	5516.43	5447.46	4584.82	10568.7	8413.77	4303.2
NORMALIZED DATA
time	b1	b2	b3	b4	b5	c1	c2	c3	c4	c5	c6	c7	c8	Average of controls
120	1	1	1	1	1	1	1	1	1	1	1	1	1	1
130	0.0493338	0.0616308	0.0880175	0.0592555	0.064374	0.945677	0.831951	0.909689	0.944802	0.927729	0.903329	0.935457	0.921885	0.915065
160	0.146526	0.0895732	0.148084	0.127185	0.10078	1.03212	0.822576	0.874189	0.904141	0.939176	0.912769	0.956275	0.846249	0.910936
190	0.156205	0.131399	0.176799	0.170322	0.121036	0.881945	0.766919	0.896749	0.932574	0.951487	0.913844	0.944665	0.830603	0.889848
220	0.153021	0.144843	0.185411	0.195895	0.126452	0.872797	0.763667	0.933558	0.893808	0.957429	0.877229	0.908957	0.829578	0.879628
250	0.17189	0.140313	0.20872	0.2097	0.129224	0.808748	0.789768	0.853123	0.945133	0.858371	0.924461	0.920263	0.910498	0.876296
280	0.200477	0.143794	0.217427	0.233691	0.145984	0.82208	0.742242	0.885443	0.93965	0.805984	0.896586	0.873562	0.829659	0.849401
310	0.216097	0.159507	0.247079	0.262033	0.157541	0.774885	0.78862	0.830799	0.865754	0.84495	0.835375	0.889856	0.825138	0.831922
320	0.186562	0.140903	0.238313	0.249412	0.15856	0.797785	0.720996	0.86226	0.861314	0.80952	0.832591	0.847443	0.779292	0.8139
620	0.305397	0.219109	0.32397	0.340504	0.249661	1.03113	0.911329	0.927837	0.990239	0.963336	0.905232	0.841649	0.852844	0.927949
920	0.249244	0.302636	0.39527	0.529451	0.335809	1.32431	0.961454	0.968468	1.00676	0.919848	0.781233	0.769273	0.874042	0.950674
1220	0.294198	0.38866	0.484504	0.635935	0.359986	1.24431	0.977088	0.991319	0.963824	0.909253	0.925781	0.892975	0.965762	0.98379
1520	0.37759	0.400491	0.514183	0.598516	0.359668	1.14383	0.947195	1.07994	1.09201	0.781325	0.938354	0.874777	0.967187	0.978077
1820	0.437433	0.462701	0.492916	0.700677	0.37684	1.09831	0.896509	1.07854	1.01345	0.811547	0.947715	0.960027	1.02006	0.978271
2120	0.433675	0.488292	0.391878	0.575316	0.502577	1.16542	0.879687	1.00232	1.00676	0.76364	1.03529	0.990509	0.88375	0.965922
2420	0.448351	0.426104	0.635989	0.627714	0.559509	1.1152	0.971986	1.06507	1.07308	0.758168	0.966264	1.0162	0.932638	0.987326
2720	0.524426	0.490033	0.590333	0.600516	0.50758	1.11928	0.975457	1.05736	1.05775	0.744837	1.04855	0.89405	0.928854	0.978268
3020	0.56498	0.501205	0.615923	0.857397	0.466871	1.04895	0.944158	1.22326	1.05162	0.778766	1.03859	0.943137	0.916515	0.993124
3320	0.586107	0.53562	0.625364	0.78492	0.530701	1.11571	1.0177	0.991889	1.03226	0.853257	0.993794	1.02895	0.994765	1.00354
3620	0.600591	0.568881	0.543183	0.746557	0.550325	1.02541	0.992937	0.938953	1.08729	0.868761	0.928289	0.895018	0.95873	0.961924
3920	0.630766	0.58505	0.615992	0.814411	0.598995	1.03794	0.998513	0.943173	1.09127	0.773284	0.996605	0.888784	0.957075	0.960831
4220	0.597667	0.76462	0.539057	0.824588	0.642405	1.13394	1.02739	1.05504	1.1234	0.761236	1.00167	0.895555	0.960217	0.994807
4520	0.589442	0.671835	0.423306	0.745361	0.676169	1.0115	1.12805	1.14046	1.08592	0.79586	1.04342	0.797648	0.863322	0.983273
CORRECTED DATA
Time	b1	b2	b3	b4	b5
120	1	1	1	1	1
130	0.0539129	0.0673513	0.0961871	0.0647555	0.0703491
160	0.160852	0.0983309	0.162562	0.13962	0.110634
190	0.175542	0.147665	0.198685	0.191405	0.136019
220	0.173961	0.164664	0.210783	0.222702	0.143757
250	0.196155	0.16012	0.238185	0.239303	0.147467
280	0.236022	0.169289	0.255977	0.275125	0.171867
310	0.259757	0.191733	0.296998	0.314972	0.18937
320	0.22922	0.17312	0.292804	0.306441	0.194815
620	0.32911	0.236122	0.349125	0.366943	0.269046
920	0.262176	0.318338	0.415779	0.556922	0.353233
1220	0.299046	0.395064	0.492488	0.646413	0.365917
1520	0.386053	0.409468	0.525707	0.611931	0.36773
1820	0.447149	0.472978	0.503865	0.71624	0.385211
2120	0.448975	0.50552	0.405704	0.595613	0.520308
2420	0.454107	0.431574	0.644153	0.635772	0.566691
2720	0.536076	0.500919	0.603447	0.613857	0.518856
3020	0.568892	0.504675	0.620188	0.863334	0.470104
3320	0.58404	0.533731	0.623158	0.782151	0.528828
3620	0.624364	0.591399	0.564684	0.776108	0.572109
3920	0.656479	0.6089	0.641103	0.847611	0.623414
4220	0.600787	0.768612	0.541871	0.828892	0.645758
4520	0.59947	0.683265	0.430507	0.758041	0.687672
	Normalize the bouton fluorescent right after bleaching to 0
Recovery Time_(sec)
0	0	0	0	0	0
30	0.113033	0.0332168	0.0734388	0.0800477	0.0433332
60	0.12856	0.0861135	0.113406	0.135419	0.0706395
90	0.126889	0.10434	0.126792	0.168882	0.0789625
120	0.150348	0.0994685	0.15711	0.186633	0.0829531
150	0.192486	0.109299	0.176795	0.224935	0.1092
180	0.217574	0.133364	0.222181	0.267542	0.128028
190	0.185297	0.113407	0.217542	0.258419	0.133885
490	0.290879	0.180959	0.279857	0.323111	0.213732
790	0.220131	0.269112	0.353604	0.526243	0.30429
1090	0.259102	0.351379	0.438476	0.621931	0.317935
1390	0.351067	0.366822	0.475232	0.585061	0.319884
1690	0.415645	0.434919	0.451064	0.696593	0.338688
1990	0.417575	0.469811	0.342456	0.567614	0.484009
2290	0.422999	0.390525	0.606282	0.610553	0.533901
2590	0.509639	0.464878	0.561245	0.58712	0.482446
2890	0.544325	0.468905	0.579767	0.853871	0.430005
3190	0.560336	0.500059	0.583053	0.767067	0.493174
3490	0.602958	0.561892	0.518356	0.760606	0.539729
3790	0.636904	0.580657	0.602908	0.83706	0.594917
4090	0.578038	0.751902	0.493116	0.817045	0.618952
4390	0.576646	0.660392	0.369899	0.741288	0.664037

## Sheet: KO 11nov F4
time	b1	b2	b3	b4	b5	background	c1	c2	c3	c4	c5	c6	c7	c8
0	6403.85	4270.39	5623.3	3614.4	7080.56	187.533	4654.84	2819.24	6078.11	4801.34	4112.13	3784.61	4227.1	4587.65
30	6172.01	4065.48	5216.29	3356.72	7241.84	184.618	4800.82	2970.8	6039.18	4592.12	3882.43	3651.79	4077.79	4433.92
60	6168.96	4196.44	5414.11	3420.48	6991.47	178.081	4467.52	2763.26	6100.27	4552.88	3955.41	3629.5	3760.34	4279.06
90	6340.89	3807.54	5371.27	3279.63	7119.42	163.276	4285.4	2683.56	6108.17	4445.81	3670.56	3375.43	3698.37	4297.73
120	6027.53	3828.41	5226.23	3224.02	7202.03	183.918	4078.73	2664.62	6201.6	4307.27	3638.61	3401.59	3896.38	4142.48
130	463.821	564.727	615.523	433.974	773.149	200.237	4125.79	2839.16	5760.34	3945.55	3602.56	3271.6	3864.35	4303.95
160	600.973	663.421	843.209	521.179	1158.4	170.582	3838.37	2578.09	5745.64	4186.47	3483.48	3230.36	3822.8	3960.53
190	709.876	724.508	912.363	553.448	1074.47	173.003	3919.1	2556.48	5683.14	4000.42	3459.27	3243.3	3884.55	4488.73
220	887.987	726.274	1018.77	555.461	1169.61	173.748	3820.45	2564.55	5707.28	4208.37	3481.42	3140.99	4066.17	4055.88
250	916.561	829.016	1050.93	637.58	1409.64	179.635	3653.43	2580.69	5638.01	4028.96	3439.34	3240.18	3738.82	3707.43
280	883.938	864.875	1076.69	642.303	1715.37	169.119	3603.74	2487.05	5650.96	4127.65	3517.43	3138.69	3625.73	3747.38
310	811.635	862.632	1157.91	652.976	1608.41	148.034	3628.91	2341.87	5576.88	4141.21	3522.09	3152.11	3538.1	3742.56
320	875.522	926.495	1186.57	668.438	1510.31	158.553	3512.95	2358.32	5511.42	4173.18	3456.71	3206.14	3560.45	3839.02
620	972.904	1095.63	1388.78	1072.23	1983.91	169.242	3548.7	2505.63	5454.7	4170.17	3628.82	3102.97	3726.49	4619.31
920	1155.21	1028.24	1524.52	1415.25	2263.56	161.262	3447.45	2503.88	5796.74	4604.74	3706.3	3126.06	3631.66	4680.38
1220	1214.79	1276.97	1746.37	1242.74	2456.28	156.368	3357.43	2730.52	5348.77	4492.74	3899.65	3235.98	3615.52	4561.76
1520	996.746	1284.84	1667.27	1235.51	2593.98	153.666	3302.04	2469.19	5650.92	3941.92	3740.56	3103.28	3404.69	4467.35
1820	1183.36	1317.16	1829.11	1385.48	2881.46	151.469	3242.57	2717.5	5626.85	4099.9	4003.07	2991.21	3666.96	4592.58
2120	1089.52	1001.59	1809.88	1662.93	3101.09	150.365	3257.05	2498.12	5924.55	4386.73	4168.29	3095.45	3538.11	3958.4
2420	1432.95	982.052	1756.41	1440.31	3027.14	143.22	3166.86	2400.22	5423.36	3780.58	4531.78	3251.7	3392.41	3928.12
2720	1263.03	886.962	1669.64	1995.05	3469.64	136.046	3128.95	2595.68	5307.51	4314.64	4250.83	3077.76	3425.23	3933.73
3020	1056.13	897.128	1987.09	1732.73	3532.31	138.269	3707.95	2420.35	5613.48	3648.38	4361.33	2921.01	2652.05	4237.51
3320	1387.8	1246.62	2383.24	1746.65	3723.57	130.367	3204.76	2166.06	5470.19	3621.54	4504.66	3102.1	2996.4	3799.58
3620	1156.1	1440.26	2744.08	1686.02	4092.72	125.929	3304.99	2306.23	5356.84	3817.4	4211.29	3055.83	3217.8	3970.32
3920	1189.59	1173.48	2970.6	1708.33	4017.15	141.156	3121.4	2331.95	5538.92	3498.01	4121.44	2928.26	2878.49	3972.91
4220	1138	1456.3	2679.5	1966.68	3846.54	118.682	3179.58	2337.5	5443.64	3417.12	4343.24	3030.27	2837.91	3851.29
4520	1268.99	1093.6	2551.77	1602.61	3733.55	127.55	3170.88	2317.92	5196.02	3496.39	4461.13	3077.06	3105.89	4235.53
time
0	6216.32	4082.85	5435.76	3426.87	6893.03	4467.3	2631.71	5890.58	4613.81	3924.59	3597.08	4039.57	4400.11
30	5987.39	3880.87	5031.67	3172.11	7057.22	4616.2	2786.18	5854.56	4407.5	3697.82	3467.18	3893.18	4249.3
60	5990.88	4018.36	5236.03	3242.4	6813.39	4289.44	2585.17	5922.19	4374.8	3777.33	3451.42	3582.26	4100.98
90	6177.61	3644.26	5207.99	3116.35	6956.15	4122.12	2520.28	5944.9	4282.54	3507.29	3212.16	3535.1	4134.45
120	5843.61	3644.49	5042.31	3040.1	7018.11	3894.81	2480.7	6017.68	4123.35	3454.69	3217.68	3712.46	3958.56
130	263.584	364.49	415.286	233.737	572.912	3925.56	2638.92	5560.1	3745.31	3402.33	3071.36	3664.11	4103.72
160	430.391	492.839	672.627	350.597	987.818	3667.79	2407.51	5575.05	4015.89	3312.89	3059.77	3652.22	3789.95
190	536.873	551.505	739.36	380.445	901.466	3746.1	2383.47	5510.14	3827.41	3286.27	3070.29	3711.54	4315.73
220	714.239	552.526	845.027	381.713	995.865	3646.71	2390.81	5533.53	4034.62	3307.67	2967.24	3892.42	3882.13
250	736.926	649.381	871.298	457.945	1230.01	3473.79	2401.05	5458.38	3849.32	3259.7	3060.54	3559.18	3527.79
280	714.819	695.756	907.573	473.184	1546.25	3434.62	2317.94	5481.84	3958.53	3348.31	2969.57	3456.61	3578.26
310	663.601	714.598	1009.88	504.942	1460.37	3480.88	2193.84	5428.85	3993.17	3374.05	3004.08	3390.07	3594.53
320	716.969	767.942	1028.02	509.885	1351.76	3354.4	2199.77	5352.86	4014.63	3298.16	3047.59	3401.9	3680.47
620	803.662	926.393	1219.54	902.984	1814.67	3379.46	2336.39	5285.46	4000.93	3459.58	2933.73	3557.24	4450.07
920	993.946	866.983	1363.26	1253.99	2102.3	3286.19	2342.62	5635.47	4443.48	3545.04	2964.8	3470.39	4519.11
1220	1058.42	1120.6	1590	1086.37	2299.91	3201.06	2574.15	5192.4	4336.38	3743.28	3079.61	3459.15	4405.39
1520	843.08	1131.17	1513.6	1081.84	2440.31	3148.38	2315.52	5497.25	3788.25	3586.89	2949.61	3251.03	4313.68
1820	1031.89	1165.69	1677.64	1234.02	2729.99	3091.1	2566.03	5475.38	3948.43	3851.6	2839.74	3515.49	4441.11
2120	939.157	851.229	1659.51	1512.57	2950.73	3106.68	2347.76	5774.19	4236.37	4017.93	2945.08	3387.75	3808.04
2420	1289.73	838.832	1613.19	1297.09	2883.92	3023.64	2257	5280.14	3637.36	4388.56	3108.48	3249.19	3784.9
2720	1126.99	750.916	1533.59	1859.01	3333.6	2992.9	2459.63	5171.47	4178.59	4114.78	2941.71	3289.18	3797.69
3020	917.863	758.859	1848.82	1594.46	3394.04	3569.69	2282.09	5475.21	3510.11	4223.06	2782.74	2513.78	4099.24
3320	1257.44	1116.25	2252.87	1616.28	3593.2	3074.39	2035.7	5339.82	3491.17	4374.29	2971.73	2866.04	3669.21
3620	1030.17	1314.33	2618.15	1560.09	3966.79	3179.06	2180.3	5230.91	3691.47	4085.36	2929.9	3091.87	3844.39
3920	1048.43	1032.32	2829.45	1567.17	3876	2980.24	2190.79	5397.76	3356.85	3980.29	2787.11	2737.34	3831.75
4220	1019.32	1337.62	2560.82	1848	3727.86	3060.9	2218.82	5324.96	3298.44	4224.56	2911.59	2719.23	3732.61
4520	1141.44	966.047	2424.22	1475.06	3606	3043.33	2190.37	5068.47	3368.84	4333.58	2949.51	2978.34	4107.98
	AVERAGE OF PREBLEACH
	6043.16	3854.17	5190.75	3199.57	6947.58	4277.97	2600.81	5925.98	4360.4	3672.34	3389.1	3752.51	4168.68
NORMALIZED DATA
time	b1	b2	b3	b4	b5	c1	c2	c3	c4	c5	c6	c7	c8	Average of controls
120	1	1	1	1	1	1	1	1	1	1	1	1	1	1
130	0.0436169	0.0945704	0.080005	0.0730527	0.0824621	0.91762	1.01465	0.938258	0.858938	0.926473	0.906246	0.976442	0.984416	0.940381
160	0.0712195	0.127872	0.129582	0.109576	0.142182	0.857367	0.925678	0.940781	0.920992	0.90212	0.902827	0.973273	0.909147	0.916523
190	0.0888398	0.143093	0.142438	0.118905	0.129753	0.875672	0.916436	0.929827	0.877767	0.894869	0.905931	0.989082	1.03527	0.928107
220	0.11819	0.143358	0.162795	0.119301	0.14334	0.852438	0.919255	0.933774	0.925288	0.900698	0.875525	1.03729	0.931261	0.92194
250	0.121944	0.168488	0.167856	0.143127	0.177041	0.812018	0.923194	0.921092	0.882792	0.887636	0.903054	0.94848	0.846261	0.890566
280	0.118286	0.18052	0.174844	0.14789	0.22256	0.802861	0.891236	0.925052	0.907836	0.911764	0.876212	0.921145	0.858368	0.886809
310	0.10981	0.185409	0.194553	0.157816	0.210199	0.813675	0.84352	0.916109	0.915782	0.918773	0.886395	0.903413	0.862269	0.882492
320	0.118641	0.19925	0.198048	0.159361	0.194565	0.784109	0.845801	0.903287	0.920703	0.898107	0.899231	0.906565	0.882886	0.880086
620	0.132987	0.240361	0.234944	0.282221	0.261194	0.789968	0.898332	0.891912	0.917559	0.942064	0.865637	0.947964	1.0675	0.915117
920	0.164475	0.224947	0.262633	0.391924	0.302595	0.768166	0.900728	0.950977	1.01905	0.965335	0.874805	0.924819	1.08406	0.935993
1220	0.175144	0.290751	0.306314	0.339536	0.331038	0.748265	0.989749	0.87621	0.994491	1.01932	0.908681	0.921823	1.05678	0.939415
1520	0.13951	0.293493	0.291596	0.338121	0.351246	0.735951	0.890308	0.927652	0.868785	0.976731	0.870323	0.86636	1.03478	0.896362
1820	0.170753	0.302451	0.323198	0.385682	0.392941	0.722562	0.986627	0.923962	0.90552	1.04881	0.837904	0.936837	1.06535	0.928447
2120	0.155408	0.220859	0.319706	0.472742	0.424713	0.726205	0.902702	0.974385	0.971555	1.0941	0.868987	0.902795	0.913487	0.919277
2420	0.213419	0.217643	0.310782	0.405396	0.415097	0.706792	0.867805	0.891016	0.83418	1.19503	0.917198	0.865871	0.907936	0.898229
2720	0.186489	0.194832	0.295447	0.581018	0.479821	0.699607	0.945718	0.872677	0.958305	1.12048	0.867992	0.876528	0.911004	0.906539
3020	0.151885	0.196893	0.356176	0.498337	0.488521	0.834434	0.877452	0.923933	0.804998	1.14996	0.821085	0.669893	0.983342	0.883137
3320	0.208076	0.289621	0.434017	0.505157	0.517187	0.718656	0.782716	0.901086	0.800654	1.19114	0.876849	0.763765	0.880186	0.864382
3620	0.170469	0.341015	0.504388	0.487596	0.57096	0.743124	0.838316	0.882708	0.84659	1.11247	0.864508	0.823947	0.922209	0.879234
3920	0.17349	0.267846	0.545093	0.489808	0.557892	0.696649	0.842351	0.910863	0.769849	1.08386	0.822373	0.729468	0.919177	0.846823
4220	0.168673	0.347058	0.493343	0.577579	0.53657	0.715501	0.853125	0.898578	0.756453	1.15037	0.859103	0.724641	0.895393	0.856646
4520	0.188882	0.25065	0.467027	0.461019	0.51903	0.711394	0.842188	0.855296	0.7726	1.18006	0.870293	0.793693	0.985439	0.87637
CORRECTED DATA
Time	b1	b2	b3	b4	b5
120	1	1	1	1	1
130	0.0463822	0.100566	0.0850772	0.0776842	0.0876901
160	0.0777062	0.139518	0.141384	0.119557	0.155131
190	0.0957214	0.154177	0.153471	0.128116	0.139803
220	0.128197	0.155496	0.176578	0.129403	0.155476
250	0.136928	0.189192	0.188482	0.160715	0.198796
280	0.133383	0.203562	0.197161	0.166766	0.250967
310	0.124432	0.210097	0.220459	0.17883	0.238188
320	0.134807	0.226398	0.225033	0.181074	0.221075
620	0.145322	0.262656	0.256736	0.308398	0.285422
920	0.175722	0.24033	0.280593	0.418725	0.323287
1220	0.186439	0.309502	0.326069	0.361434	0.352387
1520	0.15564	0.327427	0.32531	0.377215	0.391858
1820	0.183913	0.32576	0.348106	0.415406	0.423224
2120	0.169055	0.240253	0.34778	0.514253	0.462007
2420	0.2376	0.242302	0.345995	0.451329	0.462128
2720	0.205716	0.214919	0.325907	0.640919	0.529289
3020	0.171983	0.222947	0.403308	0.56428	0.553165
3320	0.240722	0.335061	0.502112	0.584414	0.598332
3620	0.193883	0.387855	0.573668	0.554569	0.649384
3920	0.204872	0.316295	0.643692	0.578407	0.658806
4220	0.1969	0.405136	0.5759	0.674233	0.626361
4520	0.215528	0.286009	0.53291	0.526056	0.59225
	Normalize the bouton fluorescent right after bleaching to 0
Recovery Time_(sec)
0	0	0	0	0	0
30	0.0328475	0.0433075	0.0615428	0.0453992	0.0739237
60	0.051739	0.0596057	0.074754	0.0546793	0.0571223
90	0.0857937	0.0610718	0.10001	0.0560745	0.0743017
120	0.0949503	0.0985354	0.11302	0.0900242	0.121785
150	0.0912328	0.114512	0.122506	0.0965854	0.178971
180	0.081846	0.121778	0.14797	0.109665	0.164963
190	0.0927252	0.139901	0.15297	0.112098	0.146206
490	0.103752	0.180214	0.187621	0.250147	0.216737
790	0.135631	0.155391	0.213696	0.369766	0.258243
1090	0.146869	0.232297	0.263402	0.307649	0.29014
1390	0.114572	0.252227	0.262572	0.32476	0.333404
1690	0.14422	0.250373	0.287488	0.366167	0.367785
1990	0.128639	0.155306	0.287131	0.47334	0.410296
2290	0.200519	0.157584	0.28518	0.405116	0.410429
2590	0.167083	0.127139	0.263224	0.610675	0.484045
2890	0.13171	0.136065	0.347822	0.527581	0.510216
3190	0.203792	0.260714	0.455814	0.549411	0.559724
3490	0.154675	0.31941	0.534024	0.517052	0.615683
3790	0.166199	0.23985	0.61056	0.542897	0.62601
4090	0.157838	0.338624	0.536464	0.646795	0.590447
4390	0.177373	0.206178	0.489476	0.486136	0.553057
