# Supplementary material for: A proline-rich motif on VGLUT1 reduces synaptic vesicle super-pool and spontaneous release frequency
Source: eLife journal article supplement (doi:10.7554/elife.50401), 2019-10-30
Supplement: supp [file elife-50401-supp-v1.zip › elife_poa_e50401_Figure_2_source_data_1.xlsx]

## Sheet: WT_delta PRD
Bouton_Area				Bouton_Intensity				Bouton_Intensity Normalized
WT	PRD2	PRD1+2		WT	PRD2	PRD1+2		WT	PRD2	PRD1+2
1.12	1.16	1.12		7008.96	6752.36	7019.04		0.540898	0.521096	0.541676
1	2.56	1.64		4440	26416.6	17597.2		0.342645	2.03864	1.35802
1.72	0.88	0.88		11682.2	4461.6	8755.12		0.901547	0.344312	0.675654
1.16	1.32	1.36		6987.84	7455.36	12120.3		0.539268	0.575348	0.935354
1.88	1.12	2.32		18083.7	6721.12	25452.7		1.39556	0.518685	1.96425
0.84	1.24	1.56		3615.36	7440	14470.6		0.279006	0.574163	1.11673
1.56	1.88	0.96		10155.6	16348.5	6168		0.783732	1.26165	0.475999
0.88	1.48	0.8		4240.72	10479.9	5288		0.327267	0.808758	0.408088
1.12	2	0.96		6754.72	18240	7129.92		0.521278	1.40762	0.550233
1.36	2.4	1.84		9445.2	21974.4	19434.1		0.728909	1.69582	1.49978
0.92	1.16	1.84		5143.72	6305.76	15997		0.396953	0.486631	1.23452
0.88	1.44	2.8		5147.12	9069.12	30928.8		0.397216	0.699886	2.38685
1.76	1.12	1.36		11751.5	8108.8	10095.3		0.906893	0.625776	0.779077
1.48	1.8	2.32		9723.6	14412.6	24392.5		0.750394	1.11225	1.88243
1.32	1.64	2.4		8607.72	11714.5	27936		0.664278	0.904038	2.15589
1.32	1.04	0.76		9603	6599.84	5962.2		0.741087	0.509325	0.460117
0.92	1.64	1.68		4287.2	12598.5	14965.4		0.330854	0.972255	1.15492
2.24	1.8	1.88		21047	14907.6	17119.3		1.62425	1.15046	1.32114
2.16	1.84	0.8		19872	15800.1	5177.6		1.53357	1.21933	0.399568
1.84	0.88	0.68		16089	4873.44	4046		1.24162	0.376095	0.31224
1.76	2.08	0.64		13536.2	19025.8	3467.52		1.04462	1.46826	0.267597
0.96	2.08	1.52		5023.68	18393.4	14143.6		0.38769	1.41947	1.0915
0.76	0.56	0.76		5024.36	3153.36	4535.68		0.387742	0.243352	0.350029
0.88	0.88	1.08		4450.16	5499.12	6929.28		0.343429	0.42438	0.534749
1.56	1.44	0.76		11381.8	11365.9	3427.6		0.878358	0.877135	0.264516
1.56	1.48	2.12		13617.2	9233.72	18418.6		1.05088	0.712588	1.4214
1.8	1.24	1.44		15910.2	7618.56	12012.5		1.22783	0.587943	0.927032
1.36	1.16	1.96		9301.04	6409	17653.7		0.717784	0.494598	1.36238
1.32	1.12	1.76		10082.2	6577.76	14546.4		0.778065	0.507621	1.12258
0.8	1.32	1.16		4162.4	9034.08	9088.6		0.321222	0.697182	0.701389
1.92	2.48	1.84		16732.8	30213.8	16232.5		1.29131	2.33168	1.2527
2	1.4	1.76		18236	9623.6	15375.4		1.40732	0.742676	1.18655
1.08	1.32	1.4		8285.76	8536.44	11582.2		0.639432	0.658778	0.893826
1.6	0.88	1.64		13032	5260.64	14899.4		1.00571	0.405976	1.14982
1.64	2.16	1.8		13861.3	15452.6	15615		1.06971	1.19252	1.20505
0.84	2.2	1		5664.96	15402.2	7086		0.437179	1.18863	0.546844
0.8	0.88	1.08		4327.2	3980.24	7635.6		0.33394	0.307165	0.589258
1.64	1.24	1.6		13587.4	6883.24	10740.8		1.04857	0.531196	0.828893
1.48	1.68	1.64		10249	12309.4	15371.7		0.79094	0.949943	1.18627
0.8	1.04	1.12		4742.4	6121.44	8572.48		0.365982	0.472406	0.661559
0.96	0.64	1.56		5801.28	2949.12	16107		0.447699	0.227591	1.24302
0.92	1.6	0.72		5986.44	13110.4	3414.24		0.461988	1.01176	0.263485
1.08	0.8	0.76		8105.4	3956	5188.52		0.625513	0.305294	0.400411
1.32	1.04	0.56		8129.88	5029.44	4805.36		0.627402	0.388134	0.370841
0.8	1.04	0.72		4364	4886.96	6359.04		0.33678	0.377138	0.490742
1.32	0.92	1.16		8884.92	3752.68	12988.5		0.685671	0.289603	1.00236
2.2	1.2	1		17439.4	7010.4	11909		1.34584	0.541009	0.919046
1.32	1.76	1.12		7382.76	11883.5	12576.5		0.569745	0.91708	0.970557
1.68	1.28	1.12		12616.8	6818.56	14519.7		0.973669	0.526205	1.12052
2.04	2.72	0.64		16897.3	29550.1	6376.32		1.30401	2.28045	0.492076
1.2	0.88	1.4		7243.2	3869.36	19509		0.558975	0.298608	1.50556
0.88	2	1.44		5074.96	14228	21218.4		0.391647	1.09801	1.63748
1.24	2.08	0.8		7735.12	17278.6	8574.4		0.596938	1.33343	0.661707
1.76	1.6	1		14645	9673.6	12161		1.13019	0.746535	0.938494
0.64	1.96	0.92		3067.52	17863.4	8570.72		0.236728	1.37857	0.661423
0.88	1.2	1.04		4511.76	6760.8	9964.24		0.348183	0.521747	0.768964
0.72	1.08	2.52		3702.96	6351.48	37958.8		0.285766	0.490159	2.92937
1.72	1.84	1.36		14511.6	14502.9	18758.5		1.1199	1.11922	1.44764
1.36	1.52	1.56		7998.16	13930.8	22343.9		0.617237	1.07507	1.72433
1.76	0.56	1.36		14877.3	2758.56	16079.3		1.14811	0.212885	1.24088
0.72	1.24	1.04		3642.48	7900.04	14474.7		0.281099	0.609665	1.11705
1.68	1.28	1.88		13508.9	8126.72	29845		1.04251	0.627158	2.30321
1.12	0.92	0.96		11698.4	8475.96	9619.2		0.902794	0.65411	0.742337
1.28	0.6	0.56		13989.1	4403.4	5186.16		1.07957	0.339821	0.400228
1.2	1.48	1.84		16165.2	15252.9	28106		1.24751	1.1771	2.16901
1.72	1.92	1.56		31427.8	24890.9	20241		2.42536	1.92089	1.56205
1.44	1.28	0.76		18424.8	11681.3	7442.68		1.42189	0.901472	0.574369
1.12	0.8	0.64		9854.88	6033.6	6350.08		0.760525	0.465627	0.490051
1.2	1.72	1.52		12584.4	24568.5	21325.6		0.971168	1.89601	1.64575
0.84	1.2	1.44		8667.12	13394.4	21513.6		0.668863	1.03368	1.66026
1.16	1.44	0.6		13863.2	16092	5664		1.06985	1.24186	0.437105
0.6	0.92	1		5257.2	6518.2	11335		0.405711	0.503025	0.874749
0.8	1.36	0.76		7890.4	12868.3	8987		0.608921	0.993079	0.693548
1.28	1.4	1.2		16794.9	14256.2	14234.4		1.2961	1.10018	1.0985
0.72	0.8	0.96		6255.36	6160.8	11826.2		0.482741	0.475444	0.912659
0.76	0.56	0.72		7173.64	4205.6	8289.36		0.553607	0.324556	0.63971
1.08	0.56	1.4		11403.7	4857.44	17103.8		0.880052	0.37486	1.31994
0.52	0.8	1.12		4403.36	7968.8	11371.4		0.339818	0.614972	0.877555
1.68	0.88	0.96		20825.3	13727.1	10766.4		1.60714	1.05936	0.830869
1.68	1.24	1.12		18520.3	26842.3	13125.3		1.42926	2.07148	1.01291
0.88	1.16	0.96		7732.56	23487.7	10729.9		0.59674	1.8126	0.828054
0.72	0.92	1		6839.28	14989.6	12242		0.527804	1.15678	0.944745
0.84	0.8	0.76		9554.16	11725.6	8746.08		0.737317	0.904893	0.674956
0.72	1	0.68		6810.48	15146	7665.64		0.525581	1.16885	0.591576
0.52	0.72	0.96		4892.68	10933.9	10107.8		0.37758	0.843797	0.780046
0.84	1.04	0.92		7013.16	21296.1	9990.28		0.541222	1.64347	0.770974
2.28	1	1.68		44079.2	19750	22236.5		3.4017	1.52415	1.71604
1.96	0.84	1.32		28668.9	13651.7	14308.8		2.21245	1.05353	1.10424
1.48	0.92	1.32		18779.7	14219.5	19846.2		1.44928	1.09736	1.53158
1.52	0.92	1.36		18949.8	19217.9	16838.2		1.4624	1.48309	1.29944
0.96	0.88	0.96		11843.5	14853.5	11951		0.913993	1.14628	0.922291
1.84	0.88	2.04		28418.8	13932.2	19694.2		2.19315	1.07518	1.51985
0.96	0.88	1.52		8851.2	15497.7	12913.9		0.683068	1.19599	0.996598
1.2	0.88	1.12		12543.6	14576.3	8579.2		0.96802	1.12489	0.662077
1.84	0.72	1.52		24356.1	10674.7	12970.2		1.87962	0.823794	1.00094
0.8	1.2	1.56		6924.8	20677.2	15002.5		0.534403	1.59571	1.15778
1.48	1.24	1.72		19691.4	18689.3	15156.6		1.51963	1.4423	1.16967
0.76	1.08	0.76		7460.92	15962.4	6330.04		0.575777	1.23186	0.488504
1.52	1	1.08		18376.8	14799	6652.8		1.41818	1.14207	0.513413
2	1.12	1.32		38668	17260.3	9995.04		2.9841	1.33202	0.771341
2.24	0.88	1		37985.9	12094.7	5679		2.93147	0.933379	0.438262
0.88	1.32	1.28		9935.2	21415.7	9698.56		0.766723	1.6527	0.748461
2.12	1.72	1.16		36156.6	32956.9	9822.88		2.79029	2.54337	0.758055
1.4	1.12	0.96		20307	18807	5667.84		1.56714	1.45138	0.437401
1.68	1	0.6		26592.7	17492	3397.2		2.05222	1.3499	0.26217
0.96	1.2	1.24		9499.2	25500	9262.8		0.733076	1.9679	0.714832
1.44	1.04	1.2		20223.4	18587.9	9122.4		1.56069	1.43447	0.703998
1.36	0.72			18588.5	11270.9			1.43452	0.869801
1.16	0.8			15396.7	10812.8			1.1882	0.83445
1.08	1.4			11736.4	28264.6			0.905723	2.18125
1.12	1.28			13127.5	26897.9			1.01308	2.07578
1.64	0.84			25925.1	12019.6			2.0007	0.927578
1.24	0.72			18536.8	11040.5			1.43053	0.85202
0.88	1.48			10088.3	25208.8			0.77854	1.94543
1.04	1.04			11524.2	16891.7			0.889353	1.30357
1.56	0.88			22949.2	12655.3			1.77104	0.976638
1.4	1.44			22846.6	22657			1.76313	1.74849
1.48	1.12			20588.3	23177.3			1.58885	1.78865
1.52	0.72			24119.4	9610.56			1.86135	0.74167
1.4	0.96			15708	15657.6			1.21222	1.20833
1.64	1.32			22031.8	26220.5			1.70024	2.0235
1.48	1.44			23167.9	27943.2			1.78792	2.15644
0.88	1.28			9152	28453.1			0.706282	2.1958
0.76	0.68			8660.96	8148.44			0.668387	0.628835
0.76	1.08			8474	20781.4			0.653959	1.60375
1	1.08			12717	18805			0.981401	1.45122

## Sheet: WT_S540A_P554A
Bouton_Area				Bouton_Intensity				Bouton_Intensity_Normalized
WT	S540A	P554A		WT	S540A	P554A		WT	S540A	P544A
2.52	1.4	1.04		67319.3	25410	12553.8		2.69979	1.01905	0.503463
1.76	1.92	1.12		31225.9	51481	15723.7		1.25229	2.06461	0.630587
1.48	0.52	1.92		29218.2	6211.4	33417.6		1.17177	0.249104	1.34019
0.76	0.8	1.32		10206	11374.4	19282.6		0.409306	0.456162	0.773313
1.36	1.2	1.16		29907.8	24182.4	15649.6		1.19943	0.969817	0.627614
2.2	1.4	1.56		48800.4	28849.8	22504.6		1.9571	1.157	0.902529
1.28	0.76	1.44		22351.4	10447	27699.8		0.896385	0.418968	1.11088
0.8	0.56	1.36		12132	8617.28	24474.6		0.486545	0.34559	0.981534
1.2	1.8	0.76		20413.2	35938.8	9935.48		0.818657	1.4413	0.398455
1.04	1.6	1.6		14310.4	33193.6	26724.8		0.573908	1.3312	1.07178
0.84	2.32	2.16		10879.7	48082	39106.8		0.436322	1.92829	1.56835
0.56	1.56	0.84		8070.72	25261.1	10177.4		0.32367	1.01308	0.408159
0.88	1.72	1.16		13622.4	39425.8	15216.9		0.546316	1.58115	0.610262
0.76	1.2	0.56		13902.7	25536	6767.6		0.557557	1.0241	0.27141
0.8	0.96	1.76		10023.2	17039	36535.8		0.401973	0.683338	1.46524
1.36	1.4	0.6		20236.8	27375.6	7990.2		0.811582	1.09788	0.320441
1.16	0.84	2.52		20044.8	15692	50082.5		0.803882	0.629318	2.00852
0.92	1.32	1.28		13446.7	27741.1	21689.6		0.539271	1.11254	0.869846
1.84	1.12	1.8		32319.6	22247.7	32560.2		1.29615	0.892227	1.3058
0.92	1.12	1.08		13373.1	18193.3	12849.8		0.536319	0.729628	0.515333
1.44	1.6	1.4		23762.9	31864	22877.4		0.952993	1.27788	0.917481
0.88	1.04	2.76		12981.8	25208.6	58363		0.520624	1.01097	2.3406
1	1.72	1.16		14380	38227	18399.9		0.576699	1.53307	0.737915
1.36	1.12	0.88		21712.4	20673	10975.4		0.87076	0.829074	0.440159
1.44	1.68	1.88		27324	38045.3	36206.9		1.09581	1.52578	1.45205
1.28	0.84	0.88		19578.9	12072.5	10718.4		0.785197	0.484158	0.429854
1.04	1.72	1.56		13836.2	37231.1	25476.4		0.554889	1.49313	1.02171
1.52	0.88	1.08		23479.4	15032.2	13922.3		0.941626	0.602854	0.558343
0.92	1.68	0.52		11125.6	29554.6	6294.08		0.446182	1.18526	0.25242
1.72	1.48	2		29642.5	26616.3	38232		1.18879	1.06743	1.53327
1.92	1.96	1.28		33928.3	44423.4	20844.8		1.36067	1.78157	0.835966
1.72	1.08	0.6		34042.2	19327.7	6921		1.36524	0.775123	0.277562
1.04	1.44	0.92		14224.1	24117.1	10247.9		0.570446	0.967199	0.410984
1.68	1.08	1.44		34665.1	17986.3	22446.7		1.39022	0.721328	0.900209
1.56	0.96	1.2		26296.9	15865	16316.4		1.05462	0.636253	0.654357
1.52	1.92	1.08		27998.4	36756.5	15088.7		1.12285	1.47409	0.60512
0.84	1.04	1.32		10497.5	20361.1	20539.2		0.420994	0.816568	0.82371
1.56	1.24	0.92		27803.9	25728.8	10336.2		1.11505	1.03183	0.414526
1.28	1.44	1.12		21730.6	28628.6	15104.3		0.871488	1.14813	0.605748
1.36	0.88	1.16		23840.8	15274.2	14284.2		0.956118	0.612559	0.572859
1.12	2.64	1.16		15746.1	81111.4	14610.2		0.631485	3.25291	0.585931
0.88	1.48	1		13884.6	27829.9	12985		0.556833	1.1161	0.520754
1.76	2.08	0.6		42984.5	50444.2	6689.4		1.72386	2.02303	0.268273
0.72	0.68	0.72		10593.4	9473.08	7461.36		0.424839	0.379911	0.299232
1.72	1.32	1.2		46940.5	22923.1	17469.6		1.88251	0.919315	0.700606
1.44	0.8	1.96		31250.9	6850.4	28670.9		1.25329	0.27473	1.14983
1.36	1.48	1.16		24470.5	18059	14762.2		0.981371	0.724241	0.592026
1.76	0.56	1.76		43301.3	5462.8	26982.6		1.73657	0.219082	1.08212
1.28	1.88	1.28		22749.4	28303.4	18973.4		0.91235	1.13509	0.760916
1.28	1.56	1.88		28408.3	24211.2	29707.8		1.13929	0.970973	1.19141
1.6	0.92	1.76		41545.6	9821	30006.2		1.66616	0.393864	1.20338
1.44	0.68	1.52		35773.9	7250.84	22310.6		1.43469	0.29079	0.894749
1.84	1.28	0.72		47908.1	13739.5	10171.4		1.92132	0.551013	0.407918
0.56	0.64	1.36		9120.72	6478.08	18388.6		0.36578	0.259799	0.73746
1.32	2.2	2.24		29746.2	39855.2	41675.2		1.19295	1.59836	1.67135
1.52	1.16	1.24		31006.5	15105.5	15793.9		1.24349	0.605796	0.633402
0.68	0.84	1.4		8842.72	9985.08	29215.2		0.354631	0.400444	1.17165
1.16	1.08	0.88		20740.8	13383.4	17274.4		0.831795	0.53673	0.692777
2.16	0.76	0.6		59209.9	7923.76	9288		2.37457	0.317777	0.372489
1.6	1.52	0.88		31491.2	19864.9	17103.7		1.26293	0.796667	0.685931
0.68	1.28	1.28		8859.72	16629.8	27649.3		0.355313	0.666924	1.10885
1.16	1.56	1.2		20769.8	21510.8	21309.6		0.832958	0.862677	0.854606
1.04	1.36	1.64		16474.6	19448	34531.8		0.660703	0.779948	1.38487
1.68	1.2	2.28		31713.4	13294.8	52180.1		1.27184	0.533178	2.09264
1.72	2.04	0.72		32052.2	35190	13754.9		1.28543	1.41127	0.551629
1.84	1.12	1.04		39762.4	13014.4	18945.7		1.59464	0.521933	0.759803
1.24	1.12	0.8		22106.7	12947.2	14111.2		0.886574	0.519238	0.565919
2.16	0.96	1		44586.7	13631	23249		1.78812	0.546663	0.932384
1.56	1.6	1.4		33276.4	25524.8	30304.4		1.33452	1.02365	1.21534
2.44	1.12	0.64		73902.7	13323.5	9613.44		2.96381	0.53433	0.38554
1.04	1.52	0.84		17014.4	23287.9	12707.5		0.68235	0.933945	0.509626
1.08	1.12	1.2		17014.3	13695.4	22244.4		0.682347	0.549242	0.892095
1.8	0.6	1.6		46643.4	5633.4	45072		1.8706	0.225923	1.80758
1.4	1.16	1.48		27748	15828.2	29413.5		1.11281	0.634778	1.17961
2.04	1.48	1.24		37595.2	21292.8	24420.6		1.50773	0.853931	0.979369
1.4	1.68	0.6		24521	28274.4	9057		0.983397	1.13392	0.363224
0.88	1.08	0.52		13345.2	12804.5	7563.92		0.5352	0.513514	0.303345
0.84		1.6		13291.3		33796.8		0.533039		1.3554
1.08		0.8		18873		9714.4		0.756888		0.389589
0.68		2.16		10093.2		56378.2		0.404782		2.261
0.8		2.16		12800		48353.8		0.513335		1.93919
1.36		1.44		25883.5		28971.4		1.03804		1.16187
0.96		1.88		16638.7		39841		0.667284		1.59779
0.68		1.96		10611.4		43937.3		0.425563		1.76207
1.12		1.96		19000.8		48302.2		0.762013		1.93713
1.16		1.64		19485.7		36335.8		0.781459		1.45722
		1.8				42481.8				1.7037
		1.92				38636.2				1.54947
		0.96				14567				0.584201
		0.72				9174.96				0.367955
		1.2				20114.4				0.806673
		0.64				8165.76				0.327482
		1.04				16173				0.648608
		1.04				16302				0.65378
		1.28				21132.8				0.847515
		2.12				59184				2.37353
		0.56				6700.4				0.268715
		2				46392				1.86052
		1.36				22682.1				0.909648
		1.4				25498.2				1.02259
		1.64				30564.7				1.22577
		1.6				25779.2				1.03386

## Sheet: WT_T544A
Bouton_Area			Bouton_Intensity			Bouton_Intensity_Normalized
WT	T544A		WT	T544A		WT	T544A
2.36	2.32		42161.4	39999.1		2.34634	2.22601
1.2	1.68		11812.8	19645.9		0.657399	1.09332
0.68	0.88		5774.56	9125.6		0.321362	0.507852
1.48	0.8		20819.2	8323.2		1.15861	0.463198
0.96	1.12		8576.64	10038.6		0.477302	0.55866
1.76	3		26305	53634		1.46391	2.98481
0.92	1.88		9154.92	23795.2		0.509484	1.32423
0.76	0.72		7377.32	6290.64		0.410558	0.350083
0.8	0.8		7805.6	6432		0.434393	0.35795
1.64	1.52		20621.4	18676.2		1.14761	1.03936
2.16	0.68		33417.4	5465.16		1.85972	0.304144
0.8	1.52		7044.8	20018.4		0.392053	1.11405
1.44	0.96		17432.6	10146.2		0.970151	0.564652
1.32	1.24		12764.4	12727.4		0.710357	0.708295
1.76	0.76		22309.8	8364.56		1.24157	0.4655
1.84	1.84		25531.8	29684.7		1.42088	1.652
1.16	1		11405.1	8666		0.634711	0.482275
1.08	1.88		10648.8	29502.8		0.592621	1.64187
0.88	0.8		9015.6	6812.8		0.501731	0.379142
1.44	1.12		20301.1	11286.2		1.12979	0.628095
1	1.08		10252	12145.7		0.570538	0.675924
1.04	0.88		13089.4	7970.16		0.728446	0.443551
1.4	1.56		20798.4	16312.9		1.15746	0.907837
1.52	2.48		19741.8	43992.7		1.09866	2.44826
0.84	1		11934.7	11557		0.664184	0.643163
1.6	1.64		27600	28467.1		1.53598	1.58424
1.08	1.32		14749.6	20227.7		0.820834	1.1257
1.08	1.4		13287.2	21295.4		0.739453	1.18512
1.68	1.36		26586	18713.6		1.47955	1.04144
1.76	1.48		27904.8	22843.8		1.55294	1.27129
1.64	1.28		24634.4	19338.2		1.37094	1.0762
1.56	0.8		20105.3	8137.6		1.11889	0.452869
1.6	1.52		25305.6	24116.3		1.40829	1.34211
1.6	1.96		22792	31444.3		1.26841	1.74992
1.2	1.32		16818	18249		0.935945	1.01558
0.8	0.8		9136.8	10648.8		0.508476	0.592621
0.96	1.36		15054.7	21679.8		0.837816	1.20651
1.92	1.64		37952.6	28162.1		2.11212	1.56726
0.96	1.24		12050.9	18415.2		0.670648	1.02483
0.68	0.96		7751.32	13408.3		0.431372	0.746192
1.04	1.28		14148.2	21769		0.787365	1.21147
1.24	2.04		18225.5	37621.7		1.01428	2.0937
1.28	0.56		21400.3	6359.92		1.19096	0.353938
2	1.92		39398	33450.2		2.19255	1.86155
1.08	1.52		15694.6	24899.1		0.873424	1.38567
1.36	1.84		18564	43597		1.03311	2.42623
1.4	0.84		19726	13844		1.09778	0.77044
1.36	2.04		19631.6	39086.4		1.09253	2.17521
1.2	1.08		14740.8	16798.3		0.820346	0.93485
1.56	1.36		32480.8	23069.7		1.8076	1.28386
1.08	1.04		14736.6	15508.5		0.820112	0.863069
1.16	0.92		13266.9	14187.3		0.738323	0.789544
2.16	1.2		47001.6	20612.4		2.61571	1.14711
0.84	1.08		11465.2	16260.5		0.638052	0.904918
1.08	1.16		18120.2	21316.2		1.00842	1.18627
0.96	1.32		11346.2	23836.6		0.631434	1.32654
1.28	1.6		19740.2	31092.8		1.09857	1.73036
1.48	1.12		24904	18736.5		1.38594	1.04271
1.12	1.4		14575.7	29810.2		0.811157	1.65898
0.84	0.72		11704.6	11325.6		0.651375	0.630286
0.88	0.8		11670.6	10671.2		0.649483	0.593867
1.16	0.84		16792.2	15213.2		0.934507	0.846638
0.92	0.84		8216.52	11365.2		0.457261	0.632489
1.48	2.12		18705.7	56269		1.041	3.13145
0.92	1.4		7996.64	22407		0.445024	1.24698
1.96	1.8		33075	36648		1.84067	2.03951
0.84	1.56		9602.88	27239.2		0.534414	1.5159
0.88	2.28		7677.12	54767.9		0.427243	3.04791
1.08	1.68		13443.8	33309.4		0.748169	1.85371
1.04	0.68		9941.36	8830.48		0.553251	0.491429
1.08	0.6		11672.6	7938.6		0.649599	0.441794
1	0.96		11225	15122.9		0.624687	0.841609
1.44	0.72		15462.7	9848.88		0.860522	0.548104
1.4	2.12		20955.2	52514.5		1.16619	2.92251
0.88	0.96		8105.68	12277.4		0.451093	0.683257
1.08	1.16		15926.8	16707.5		0.886347	0.929795
1.44	0.64		18869.8	9250.56		1.05013	0.514807
1.8	1.64		26690.4	28914.8		1.48536	1.60915
1.44	1.52		18267.8	24353.4		1.01663	1.3553
1.4	1.36		16993.2	21598.2		0.945695	1.20197
1.48	0.76		18380.1	8255.88		1.02288	0.459451
1.32	0.64		19204.7	8188.16		1.06877	0.455683
1.28	0.64		17199.4	8347.52		0.957168	0.464551
1.48	0.84		21115.2	11889.4		1.17509	0.661659
0.96	1.36		11139.8	20272.2		0.619948	1.12817
1.24	0.8		15939	10515.2		0.887025	0.585186
1.88	1.84		41121.2	40369.6		2.28845	2.24662
1.64	2.04		24363.8	51463.1		1.35588	2.86399
1.52			30898.6			1.71955
0.76			8394.2			0.467149
1.4			17474.8			0.972497
