# Supplementary material for: A proline-rich motif on VGLUT1 reduces synaptic vesicle super-pool and spontaneous release frequency
Source: eLife journal article supplement (doi:10.7554/elife.50401), 2019-10-30
Supplement: supp [file elife-50401-supp-v1.zip › elife_poa_e50401_Figure_3_figure_supplement_1_source_data_1.xlsx]

## Sheet: WT
			DIV	Code	Mutant		Leak current	Access Resistance	Membrane Resistance	Tau		At -70mV	Time (sec)	Event number	Mean Amplitude	Frequency		At 0mV	Time (sec)	Event number	Mean Amplitude	Frequency
###		Cell 18/ 17 o16 029	19	278	AAV-WT	###	-1	-1133	-45	1.61	###	mEPSC	38	19	-13.921		###	mIPSC	86	202	20.358		###
###		Cell 19/ 17 o16 029	19	278	AAV-WT	###	-459	-1313	-80	1.06	###	mEPSC	38	19	-15.491		###	mIPSC	86	169	24.359		###
###		Cell 20/ 17 o16 032	19	278	AAV-WT	###	-71	-1488	-139	2.73	###	mEPSC	60	480	-11.644		###	mIPSC	65	42	17.28		###
###		Cell 21/ 17 o16 032	19	278	AAV-WT	###	-23	-889	-34	2.22	###	mEPSC	60	284	-11.695		###	mIPSC	60	51	16.907		###
###		Cell 22/ 17 o16 034	19	278	AAV-WT	###	-210	-1245	-94	2.28	###	mEPSC	66	138	-10.65		###	mIPSC	66	368	16.823		###
###		Cell 23/ 17 o16 034	19	278	AAV-WT	###	-7	-1127	-45	1.77	###	mEPSC	66	124	-12.888		###	mIPSC	66	358	19.031		###
###		Cell 17/ 17 o17 023	20	278	AAV-WT	###	-14	-1036	-62	1.44	###	mEPSC	11	28	-15.108		###	mIPSC	65	497	18.863		###
###		Cell 18/ 17 o17 025	20	278	AAV-WT	###	-60	-1340	-65	1.66	###	mEPSC	58	85	-14.702		###	mIPSC	41	279	16.72		###
###		Cell 19/ 17 o17 027	20	278	AAV-WT	###	-48	-1062	-26	1.47	###	mEPSC	43	48	-10.78		###	mIPSC	43	266	21.19		###
###		Cell 20/ 17 o17 027	20	278	AAV-WT	###	-105	-921	-36	1.19	###	mEPSC	43	87	-16.912		###	mIPSC	43	401	21.76		###
###		Cell 21/ 17 o17 030	20	278	AAV-WT	###	-213	-1424	-147	2.08	###	mEPSC	34	395	-28.83		###	mIPSC	34	149	20.28		###
###		Cell 21/ 17 o18 028	21	278	AAV-WT	###	-29	-1191	-67	2.4	###	mEPSC	51	50	-9.72		###	mIPSC	51	171	16.52		###
###		Cell 22/ 17 o18 028	21	278	AAV-WT	###	-410	-801	-108	2.12	###	mEPSC	51	450	-10.976		###	mIPSC	51	698	15.44		###
###		Cell 23/ 17 o18 030	21	278	AAV-WT	###	-100	-835	-53	1.52	###	mEPSC	45	55	-14.009		###	mIPSC	45	2	7.56		###
###		Cell 24/ 17 o18 032	21	278	AAV-WT	###	-71	-776	-56	1.28	###	mEPSC	66	134	-7.823		###	mIPSC	66	47	22.21		###
###		Cell 25/ 17 o18 032	21	278	AAV-WT	###	-28	-858	-43	1.78	###	mEPSC	52	505	-12.322		###	mIPSC	52	20	16.82		###
###		Cell 21/ 17 o23 028	19	278	AAV-WT	###	-165	-1211	-82	2.44	###	mEPSC	66	436	-15.732	6.60606	###	mIPSC	66	455	20.405	6.89394	###
###		Cell 22/ 17 o23 028	19	278	AAV-WT	###	-94	-833	-67	1.05	###	mEPSC	66	689	-42.965	10.4394	###	mIPSC	66	452	42.184	6.84848	###
###		Cell 23/ 17 o23 030	19	278	AAV-WT	###	-5	-1092	-46	2.42	###	mEPSC	54	119	-13.992	2.2037	###	mIPSC	54	242	16.292	4.48148	###
###		Cell 24/ 17 o23 033	19	278	AAV-WT	###	-248	-973	-51	1.72	###	mEPSC					###	mIPSC	60	59	12.977	0.983333	###
###		Cell 25/ 17 o23 033	19	278	AAV-WT	###	-305	-1010	-78	2.5	###	mEPSC					###	mIPSC	60	162	12.881	2.7	###
###		Cell 9/ 17 o24 017	20	278	AAV-WT	###	-115	-1100	-27	1.19	###	mEPSC	67	121	-14.609	1.80597	###	mIPSC	67	126	17.751	1.8806	###
###		Cell 10/ 17 o24 017	20	278	AAV-WT	###	-60	-956	-24	1.49	###	mEPSC	67	135	-22.522	2.01493	###	mIPSC	67	168	19.257	2.50746	###
###		Cell 11/ 17 o24 020	20	278	AAV-WT	###	-101	-1238	-70	1.8	###	mEPSC	13	47	-13.959	3.61538	###	mIPSC	60	40	12.823	0.666667	###
###		Cell 12/ 17 o24 020	20	278	AAV-WT	###	0	-859	-37	1.93	###	mEPSC	60	102	-13.975	1.7	###	mIPSC	60	506	19.072	8.43333	###
###		Cell 13/ 17 o24 022	20	278	AAV-WT	###	-37	-975	-34	1.82	###	mEPSC	32	85	-14.012	2.65625	###	mIPSC	60	155	missing	2.58333	###
###		Cell 14/ 17 o24 022	20	278	AAV-WT	###	-13	-867	-34	2.13	###	mEPSC	60	92	-13.205	1.53333	###	mIPSC	60	186	missing	3.1	###
###		Cell 20/ 17 o25 035	21	278	AAV-WT	###	-28	-313	-5	0.81	###	mEPSC	48	4	-14.984	0.0833333	###	mIPSC	48	0	--	0	###
###		Cell 21/ 17 o25 037	21	278	AAV-WT	###	-87	-1233	-37	2.1	###	mEPSC	65	67	1.03077	-13.39	###	mIPSC	65	333	16.68	5.12308	###
###		Cell 22/ 17 o25 037	21	278	AAV-WT	###	-52	-1272	-43	1.68	###	mEPSC	45	68	1.51111	-15.96	###	mIPSC	45	341	21.098	7.57778	###
###		Cell 23/ 17 o25 040	21	278	AAV-WT	###	-126	-1323	-205	1.63	###	mEPSC	22	215	-19.753	9.77273	###	mIPSC	70	187	14.13	2.67143	###
###		Cell 24/ 17 o25 042	21	278	AAV-WT	###	-69	-1090	-62	2.25	###	mEPSC	60	149	-15.08	2.48333	###	mIPSC	60	29	12.12	0.483333	###
###		Cell 25/ 17 o25 042	21	278	AAV-WT	###	-18	-1017	-44	2.57	###	mEPSC	60	130	-12.573	2.16667	###	mIPSC	60	230	12.06	3.83333	###

## Sheet: sVGLUT1
			DIV	Code	Mutant		Leak current	Access Resistance	Membrane Resistance	Tau		At -70mV	Time (sec)	Event number	Mean Amplitude	Frequency		At 0mV	Time (sec)	Event number	Mean Amplitude	Frequency
###	9/27/17	Cell 1/ 17 o16 002	19	282	AAV-sVGLUT1	###	-140	-998	-44	1.37	###	mEPSC	67	9	-10.118		###	mIPSC	67	119	13.678		###
###		Cell 15/ 17 o16 023	19	282	AAV-sVGLUT1	###	-116	-956	-41	1.28	###	mEPSC	69	35	-11.911		###	mIPSC	69	47	35.052		###
###		Cell 16/ 17 o16 027	19	282	AAV-sVGLUT1	###	-40	-1030	-60	2.9	###	mEPSC	82	34	-10.173		###	mIPSC	82	218	15.275		###
###		Cell 17/ 17 o16 027	19	282	AAV-sVGLUT1	###	-67	-872	-45	1.75	###	mEPSC	82	60	-11.593		###	mIPSC	82	146	19.021		###
###		Cell 22/ 17 o17 032	20	282	AAV-sVGLUT1	###	-16	-1103	-41	1.89	###	mEPSC	57	11	-10.48		###	mIPSC	57	45	18.728		###
###		Cell 23/ 17 o17 032	20	282	AAV-sVGLUT1	###	-120	-919	-55	2.74	###	mEPSC	57	Dead	--		###	mIPSC	57	59	18.83		###
###		Cell 24/ 17 o17 034	20	282	AAV-sVGLUT1	###	4	-1340	-48	2.01	###	mEPSC	65	26	-12.771		###	mIPSC	65	425	17.01		###
###		Cell 25/ 17 o17 034	20	282	AAV-sVGLUT1	###	-4	-1130	-45	2.16	###	mEPSC	65	35	-9.09		###	mIPSC	65	492	16.252		###
###		Cell 26/ 17 o17 036	20	282	AAV-sVGLUT1	###	-56	-1348	-40	1.99	###	mEPSC	72	65	-8.238		###	mIPSC	72	247	14.75		###
###		Cell 27/ 17 o17 038	20	282	AAV-sVGLUT1	###	16	-1128	-35	1.51	###	mEPSC	3	8	-10.98		###	mIPSC	36	101	13.46		###
###		Cell 13/ 17 o18 015	21	282	AAV-sVGLUT1	###	-113	-1218	-43	2	###	mEPSC	46	54	-11.07		###	mIPSC	46	251	18.31		###
###		Cell 14/ 17 o18 017	21	282	AAV-sVGLUT1	###	-47	-752	-42	1.5	###	mEPSC	63	25	-6.246		###	mIPSC	63	8	12.65		###
###		Cell 15/ 17 o18 019	21	282	AAV-sVGLUT1	###	-70	-1109	-46	1.48	###	mEPSC	92	95	-14.611		###	mIPSC	92	18	14.437		###
###		Cell 16/ 17 o18 019	21	282	AAV-sVGLUT1	###	-62	-1029	-39	1.85	###	mEPSC	23	101	-9.08		###	mIPSC	64	16	21.36		###
###	2017-04-10	Cell 13/ 17 o21 019	17	282	AAV-sVGLUT1	###	5	-1052	-25	0.688146	###	mEPSC	68	38	-12.768	0.558824	###	mIPSC	100	373	17.684	3.73	###
###		Cell 14/ 17 o21 022	17	282	AAV-sVGLUT1	###	-18	-1060	-28	0.819611	###	mEPSC	21	45	-19.458	2.14286	###	mIPSC	74	190	15.726	2.56757	###
###		Cell 15/ 17 o21 024	17	282	AAV-sVGLUT1	###	-35	-1056	-27	0.650892	###	mEPSC	68	32	-13.228	0.470588	###	mIPSC	68	137	14.831	2.01471	###
###		Cell 16/ 17 o21 028	17	282	AAV-sVGLUT1	###	-30	-1072	-45	1.53623	###	mEPSC	58	144	-17.646	2.48276	###	mIPSC	69	382	20.394	5.53623	###
###		Cell 17/ 17 o21 031	17	282	AAV-sVGLUT1	###	-46	-995	-50	1.7193	###	mEPSC	105	0	-11.083	0	###	mIPSC	59	579	20.545	9.81356	###
###		Cell 6/ 17 o22 011	18	282	AAV-sVGLUT1	###	-140	-1110	-50	1.35861	###	mEPSC	57	29	-8.391	0.508772	###	mIPSC	57	117	11.146	2.05263	###
###		Cell 7/ 17 o22 011	18	282	AAV-sVGLUT1	###	-310	-835	-105	1.67228	###	mEPSC	57	1682	-28.453	29.5088	###	mIPSC	57	3	6.148	0.0526316	###
###		Cell 8/ 17 o22 013	18	282	AAV-sVGLUT1	###	-70	-860	-28	0.932313	###	mEPSC	57	412	-22.14	7.22807	###	mIPSC	57	297	18.53	5.21053	###
###		Cell 9/ 17 o22 015	18	282	AAV-sVGLUT1	###	-45	-958	-36	1.57492	###	mEPSC	63	420	-16.836	6.66667	###	mIPSC	63	94	15.08	1.49206	###
###		Cell 10/ 17 o22 017	18	282	AAV-sVGLUT1	###	-80	-858	-60	0.925288	###	mEPSC	62	256	-22.458	4.12903	###	mIPSC	62	180	16.943	2.90323	###
###		Cell11/ 17 o22 019	18	282	AAV-sVGLUT1	###	-198	-847	-65	1.35393	###	mEPSC	63	149	-12.025	2.36508	###	mIPSC	66	27	12.559	0.409091	###
###		Cell 12/ 17 o22 019	18	282	AAV-sVGLUT1	###	-204	-1070	-68	1.5881	###	mEPSC	63	154	-12.843	2.44444	###	mIPSC	66	176	18.374	2.66667	###
###		Cell 17/ 17 o23 021	19	282	AAV-sVGLUT1	###	-49	-950	-29	1.44	###	mEPSC	55	10	-8.1	0.181818	###	mIPSC	55	1	5	0.0181818	###
###		Cell 18/ 17 o23 021	19	282	AAV-sVGLUT1	###	-40	-844	-30	1.73	###	mEPSC	55	17	-6.603	0.309091	###	mIPSC	55	0	--	0	###
###		Cell 19/ 17 o23 024	19	282	AAV-sVGLUT1	###	-35	-1006	-34	1.51	###	mEPSC	65	66	-12.837	1.01538	###	mIPSC	65	257	12.581	3.95385	###
###		Cell 20/ 17 o23 026	19	282	AAV-sVGLUT1	###	-192	-945	-60	1.36	###	mEPSC	19	31	-8.263	1.63158	###	mIPSC	75	206	16.195	2.74667	###
###		Cell 6/ 17 o24 010	20	282	AAV-sVGLUT1	###	-160	-1032	-51	1.8	###	mEPSC	49	75	-7.759	1.53061	###	mIPSC	49	400	12.956	8.16327	###
###		Cell 7/ 17 o24 012	20	282	AAV-sVGLUT1	###	-157	-1095	-59	1.73	###	mEPSC	51	474	-11.021	9.29412	###	mIPSC	51	178	11.606	3.4902	###
###		Cell 8/ 17 o24 012	20	282	AAV-sVGLUT1	###	-445	-630	-106	1.03	###	mEPSC	51	409	-18.289	8.01961	###	mIPSC	51	140	11.693	2.7451	###
###		Cell 16/ 17 o25 022	21	282	AAV-sVGLUT1	###	-189	-797	-85	1.81	###	mEPSC	60	361	-18.906	6.01667	###	mIPSC	60	728	30.08	12.1333	###
###		Cell 17/ 17 o25 022	21	282	AAV-sVGLUT1	###	-2	-898	-33	1.51	###	mEPSC	60	32	-9.98	0.533333	###	mIPSC	60	687	28.66	11.45	###
###		Cell 18/ 17 o25 030	21	282	AAV-sVGLUT1	###	-73	-1500	-24	0.98	###	mEPSC	24	27	-10.629	1.125	###	mIPSC	60	249	17.3	4.15	###
###		Cell 19/ 17 o25 032	21	282	AAV-sVGLUT1	###	-68	-1346	-44	2.34	###	mEPSC	13	6	-19.816	0.461538	###	mIPSC	66	171	15.46	2.59091	###
###		Cell 9/ 17 n04 014	17	282	AAV-sVGLUT1	###	2	-815	-15	0.544102	###	mEPSC	52	193	-24.563	3.71154	###	mIPSC	64	293	16.368	4.57812	###
###		Cell 10/ 17 n04 014	17	282	AAV-sVGLUT1	###	-22	-775	-18	0.650722	###	mEPSC	52	96	-15.596	1.84615	###	mIPSC	64	396	17.478	6.1875	###
###		Cell 11/ 17 n04 016	17	282	AAV-sVGLUT1	###	-40	1345	-40	0.700482	###	mEPSC	20	20	-14.685	1	###	mIPSC	56	408	20.485	7.28571	###
###		Cell 12/ 17 n04 019	17	282	AAV-sVGLUT1	###	-105	-920	-35	1.08606	###	mEPSC	54	87	-9.012	1.61111	###	mIPSC	54	192	13.002	3.55556	###
###		Cell 3/ 17 n05 009	18	282	AAV-sVGLUT1	###	-58	-825	-34	0.538851	###	mEPSC	61	21	-11.3	0.344262	###	mIPSC	170	63	27.414	0.370588	###
###		Cell 4/ 17 n05 009	18	282	AAV-sVGLUT1	###	15	-925	-22	0.601815	###	mEPSC	61	17	-11.433	0.278689	###	mIPSC	170	638	28.51	3.75294	###
###		Cell 5/ 17 n05 015	18	282	AAV-sVGLUT1	###	-44	-828	-16	0.675304	###	mEPSC	61	17	-9.49	0.278689	###	mIPSC	74	30	20.967	0.405405	###
###		Cell 6/ 17 n06 009	19	282	AAV-sVGLUT1	###	-10	-928	-20	0.497477	###	mEPSC	75	14	-18.856	0.186667	###	mIPSC	75	6	17.757	0.08	###
###		Cell 7/ 17 n06 012	19	282	AAV-sVGLUT1	###	-60	-759	-22	1.23163	###	mEPSC	61	62	-14.178	1.01639	###	mIPSC	61	239	13.927	3.91803	###
###		Cell 8/ 17 n06 015	19	282	AAV-sVGLUT1	###	-20	-865	-30	0.672373	###	mEPSC	51	121	-17.27	2.37255	###	mIPSC	51	424	17.747	8.31373	###
###		Cell 9/ 17 n06 015	19	282	AAV-sVGLUT1	###	-50	-504	-30	0.507133	###	mEPSC	51	386	-31.437	7.56863	###	mIPSC	51	298	18.631	5.84314	###
###		Cell 6/ 17 n07 007	20	282	AAV-sVGLUT1	###	-60	-800	-50	0.939247	###	mEPSC	50	270	-8.988	5.4	###	mIPSC	40	673	20.261	16.825	###
###		Cell 7/ 17 n07 007	20	282	AAV-sVGLUT1	###	24	-835	-38	1.05319	###	mEPSC	50	211	-8.334	4.22	###	mIPSC	40	716	24.775	17.9	###
###		Cell 8/ 17 n07 010	20	282	AAV-sVGLUT1	###	-104	-1095	-33	0.982288	###	mEPSC	43	94	-9.809	2.18605	###	mIPSC	63	235	19.289	3.73016	###
###		Cell 9/ 17 n07 010	20	282	AAV-sVGLUT1	###	-5	-808	-20	1.07249	###	mEPSC	43	28	-10.828	0.651163	###	mIPSC	63	6	23.378	0.0952381	###
###		Cell 10/ 17 n07 012	20	282	AAV-sVGLUT1	###	-50	-907	-16	0.435931	###	mEPSC	47	34	-9.156	0.723404	###	mIPSC	65	84	20.59	1.29231	###
###		Cell 7/ 17 n08 013	21	282	AAV-sVGLUT1	###	-20	-835	-20	0.704544	###	mEPSC	106	20	-11.519	0.188679	###	mIPSC	103	156	15.92	1.51456	###
###		Cell 8/ 17 n08 013	21	282	AAV-sVGLUT1	###	22	-880	-25	1.12363	###	mEPSC	106	15	-9.044	0.141509	###	mIPSC	103	226	14.293	2.19417	###
###		Cell 9/ 17 n08 016	21	282	AAV-sVGLUT1	###	-101	-855	-42	0.748843	###	mEPSC	43	189	-10.557	4.39535	###	mIPSC	114	936	23.75	8.21053	###
###		Cell 10/ 17 n08 016	21	282	AAV-sVGLUT1	###	-20	-960	-45	1.26404	###	mEPSC	32	13	-12.704	0.40625	###	mIPSC	114	385	17.849	3.37719	###
