# Supplementary material for: A proline-rich motif on VGLUT1 reduces synaptic vesicle super-pool and spontaneous release frequency
Source: eLife journal article supplement (doi:10.7554/elife.50401), 2019-10-30
Supplement: supp [file elife-50401-supp-v1.zip › elife_poa_e50401_Figure_3_source_data_1.xlsx]

## Sheet: WT-1010-C1
		Raw Data
	Time_(sec)	Roi1	Roi2	Roi3	Roi4	Roi5	Ref_fluo	Background
1	0	2097401	923601	1938395	2070153	1618502	706888623	38469368
2	30	2.04591e+06	926890	1.87786e+06	1.13804e+06	1.6645e+06	7.02103e+08	3.85263e+07			Filter out due to large abrupt change or wrong targeting
3	60	2.03821e+06	1.17857e+06	1.87928e+06	1.61973e+06	1.70158e+06	7.01393e+08	3.86415e+07
4	90	1.92218e+06	1.81928e+06	1.90272e+06	1.18872e+06	1.62948e+06	7.03355e+08	3.84948e+07
5	120	1.92072e+06	1.0113e+06	1.87349e+06	1.12979e+06	1.55918e+06	7.02145e+08	3.85334e+07
6	150	2.02726e+06	978742	1.87538e+06	1.43172e+06	1.6939e+06	7.03578e+08	3.85618e+07
7	180	1.94088e+06	909198	1.92473e+06	1.47845e+06	1.61113e+06	6.99608e+08	3.85449e+07
8	210	1.22605e+06	857129	1.22547e+06	886820	1.33655e+06	6.89908e+08	3.84818e+07
9	240	1.36143e+06	863120	1.27826e+06	901408	1.44958e+06	7.04004e+08	3.84852e+07
10	270	1.36116e+06	968540	1.30726e+06	1.02915e+06	1.46145e+06	6.98391e+08	3.85032e+07
11	300	1.40567e+06	957574	1.29079e+06	1.02251e+06	1.48326e+06	6.98041e+08	3.84638e+07
12	330	1.37967e+06	955167	1.28391e+06	968219	1.47477e+06	6.99849e+08	3.85886e+07
13	360	1.40414e+06	888087	1.29891e+06	1.13746e+06	1.42329e+06	6.99547e+08	3.84218e+07
14	390	1.4426e+06	923379	1.29811e+06	1.15851e+06	1.41229e+06	6.96318e+08	3.84118e+07
15	690	1.48904e+06	1.06381e+06	1276614	1.08138e+06	1.38507e+06	6.9721e+08	3.85114e+07
16	990	1.50975e+06	1.12326e+06	1.28794e+06	1.2376e+06	1.47926e+06	6.97914e+08	3.84436e+07
17	1290	1.52462e+06	1.15295e+06	1.28754e+06	1.67256e+06	1.58891e+06	6.95531e+08	3.84556e+07
18	1590	1.53175e+06	1.28202e+06	1.2828e+06	1.19015e+06	1.58572e+06	6.96877e+08	3.84746e+07
19	1890	1.56313e+06	1.35274e+06	1.29408e+06	1.19804e+06	1.39896e+06	6.95162e+08	3.8289e+07
20	2190	1.55553e+06	1.16631e+06	1.28559e+06	1.0752e+06	1.46225e+06	6.93486e+08	3.84203e+07
21	2490	1.53353e+06	870952	1.28544e+06	1.02804e+06	1.4981e+06	6.87315e+08	3.8282e+07
22	2790	1.5066e+06	863416	1.29245e+06	1.00036e+06	1.4498e+06	6.87465e+08	3.82535e+07
23	3090	1.59351e+06	1.20716e+06	1.26538e+06	1.0769e+06	1.44293e+06	6.93195e+08	3.83718e+07
24	3390	1.63542e+06	1.26223e+06	1.27448e+06	1.08179e+06	1.50541e+06	6.81653e+08	3.8387e+07
25	3690	1.59477e+06	1.23934e+06	1.27682e+06	924814	1.30301e+06	6.84671e+08	3.83816e+07
26	3990	1.63089e+06	1.12976e+06	1.30086e+06	925071	1.3412e+06	6.92469e+08	3.8561e+07
27	4290	1.74365e+06	994171	1.29994e+06	1.01332e+06	1.35617e+06	6.86213e+08	3.83897e+07
28	4590	1.81098e+06	899653	1.31162e+06	1.03201e+06	1.35831e+06	6.81736e+08	3.84189e+07
		Background corrected Data
	Time_(sec)	Roi1-bkgd-corr	Roi2-bkgd-corr	Roi3-bkgd-corr	Roi4-bkgd-corr	Roi5-bkgd-corr	Ref_fluo-bkgd-corr
1	0	1.37548e+06	201680	1.21647e+06	1.34823e+06	896581	3.66864e+08
2	30	1.32292e+06	203901	1.15487e+06	415049	941514	3.61575e+08
3	60	1.31306e+06	453418	1.15413e+06	894579	976424	3.59847e+08
4	90	1.19978e+06	1.09688e+06	1.18032e+06	466319	907082	3.63105e+08
5	120	1.1976e+06	288179	1.15036e+06	406666	836053	3.61554e+08
6	150	1.3036e+06	255086	1.15172e+06	708060	970239	3.62736e+08
7	180	1.21754e+06	185858	1.20139e+06	755107	887792	3.58915e+08
8	210	503901	134976	503318	164667	614394	3.49773e+08
9	240	639208	140903	556042	179191	727358	3.6384e+08
10	270	638602	245984	584700	306591	738896	3.58067e+08
11	300	683854	235758	568971	300699	761446	3.58066e+08
12	330	655511	231008	559755	244060	750611	3.5877e+08
13	360	683107	167058	577883	416431	702265	3.59943e+08
14	390	721755	202538	577273	437664	691445	3.56802e+08
15	690	766329	341099	553904	358675	662356	3.56813e+08
16	990	788311	401818	566503	516163	757824	3.58117e+08
17	1290	802957	431289	565881	950899	867245	3.55628e+08
18	1590	809726	560003	560777	468134	863697	3.56805e+08
19	1890	844592	634207	575548	479506	680423	3.56732e+08
20	2190	834530	445308	564594	354202	741245	3.53895e+08
21	2490	815121	152547	567033	309632	779691	3.48946e+08
22	2790	788734	145547	574579	282487	731931	3.49349e+08
23	3090	873424	487070	545289	356813	722840	3.54032e+08
24	3390	915046	541852	554107	361413	785035	3.42357e+08
25	3690	874492	519062	556548	204540	582731	3.45421e+08
26	3990	907246	406122	577223	201430	617562	3.51634e+08
27	4290	1.02323e+06	273744	579511	292896	635739	3.46892e+08
28	4590	1.09e+06	178680	590642	311041	637341	3.42158e+08
		Bleaching Corrected Data
	Time_(sec)	Roi1-bkgd_bleach-corr	Roi2-bkgd_bleach-corr	Roi3-bkgd_bleach-corr	Roi4-bkgd_bleach-corr	Roi5-bkgd_bleach-corr
1	0	0.004	0.0005497	0.003	0.004	0.002
2	30	0.004	0.0005639	0.003	0.001	0.003
3	60	0.004	0.001	0.003	0.002	0.003
4	90	0.003	0.003	0.003	0.001	0.002
5	120	0.003	0.0007971	0.003	0.001	0.002
6	150	0.004	0.0007032	0.003	0.002	0.003
7	180	0.003	0.0005178	0.003	0.002	0.002
8	210	0.001	0.0003859	0.001	0.0004708	0.002
9	240	0.002	0.0003873	0.002	0.0004925	0.002
10	270	0.002	0.000687	0.002	0.0008562	0.002
11	300	0.002	0.0006584	0.002	0.0008398	0.002
12	330	0.002	0.0006439	0.002	0.0006803	0.002
13	360	0.002	0.0004641	0.002	0.001	0.002
14	390	0.002	0.0005676	0.002	0.001	0.002
15	690	0.002	0.000956	0.002	0.001	0.002
16	990	0.002	0.001	0.002	0.001	0.002
17	1290	0.002	0.001	0.002	0.003	0.002
18	1590	0.002	0.002	0.002	0.001	0.002
19	1890	0.002	0.002	0.002	0.001	0.002
20	2190	0.002	0.001	0.002	0.001	0.002
21	2490	0.002	0.0004372	0.002	0.0008873	0.002
22	2790	0.002	0.0004166	0.002	0.0008086	0.002
23	3090	0.002	0.001	0.002	0.001	0.002
24	3390	0.003	0.002	0.002	0.001	0.002
25	3690	0.003	0.002	0.002	0.0005921	0.002
26	3990	0.003	0.001	0.002	0.0005728	0.002
27	4290	0.003	0.0007891	0.002	0.0008443	0.002
28	4590	0.003	0.0005222	0.002	0.0009091	0.002
		Normalized Data
	Time_(sec)	Roi1_corr_norm	Roi2_corr_norm	Roi3_corr_norm	Roi4_corr_norm	Roi5_corr_norm
1	0	1	1	1	1	1
2	30	0.972342	1.01352	0.960983	0.323031	1.05896
3	60	0.971269	2.03412	0.966451	0.696242	1.08977
4	90	0.882955	4.95746	0.975506	0.372389	0.99697
5	120	0.895986	1.38321	0.952471	0.313781	0.9399
6	150	0.967874	1.20689	0.953585	0.532948	1.07478
7	180	0.917466	0.97562	1.00566	0.606528	0.994965
8	210	0.455473	0.69462	0.439804	0.152201	0.712423
9	240	0.523955	0.785	0.467283	0.1428	0.816597
10	270	0.532236	1.24883	0.49356	0.240307	0.841624
11	300	0.577409	1.14128	0.484938	0.236553	0.855931
12	330	0.531921	1.14938	0.474301	0.204646	0.840763
13	360	0.567309	0.8461	0.491196	0.329067	0.791045
14	390	0.59052	1.00704	0.490313	0.336691	0.792044
15	690	0.610995	1.71292	0.474061	0.274579	0.764448
16	990	0.61835	1.79889	0.483137	0.405796	0.882614
17	1290	0.639659	1.95016	0.49341	0.726379	1.00153
18	1590	0.643312	2.47016	0.490138	0.356064	0.9732
19	1890	0.66165	2.72821	0.497999	0.364291	0.779685
20	2190	0.667786	2.01595	0.494877	0.285512	0.852341
21	2490	0.649644	0.77295	0.506387	0.244764	0.929939
22	2790	0.627245	0.76191	0.507525	0.229974	0.860723
23	3090	0.680355	2.36004	0.476161	0.290857	0.838172
24	3390	0.706451	2.68605	0.512682	0.285832	0.929937
25	3690	0.685403	2.47356	0.507568	0.166287	0.713222
26	3990	0.70996	2.06092	0.514968	0.159307	0.764332
27	4290	0.788924	1.39207	0.5219	0.241245	0.808375
28	4590	0.84016	0.91886	0.542467	0.255945	0.800063
		Normalize the bouton fluorescent right after bleaching to 0
	Recovery Time_(sec)
1	0	0	0	0	0	0
2	30	0.336297	0.0820732	0.0514859	-0.0236757	0.336297
3	60	0.41709	0.503273	0.10072	0.221889	0.41709
4	90	0.463276	0.405608	0.0845652	0.212434	0.463276
5	120	0.41431	0.412963	0.0646352	0.132079	0.41431
6	150	0.253809	0.137558	0.0962904	0.445424	0.253809
7	180	0.257034	0.283706	0.094636	0.464625	0.257034
8	480	0.167948	0.924709	0.0641855	0.3082	0.167948
9	780	0.549415	1.00278	0.0811907	0.638661	0.549415
10	1080	0.933315	1.14014	0.100439	1.44603	0.933315
11	1380	0.841847	1.61235	0.0943081	0.513414	0.841847
12	1680	0.217137	1.84668	0.109037	0.534133	0.217137
13	1980	0.451687	1.19989	0.103187	0.335734	0.451687
14	2280	0.70219	0.0711308	0.124753	0.233113	0.70219
15	2580	0.478746	0.0611054	0.126885	0.195866	0.478746
16	2880	0.405946	1.51235	0.0681202	0.349195	0.405946
17	3180	0.702184	1.8084	0.136548	0.33654	0.702184
18	3480	0.00257935	1.61544	0.126966	0.0354746	0.00257935
19	3780	0.167574	1.24072	0.140831	0.0178959	0.167574
20	4080	0.309755	0.633348	0.153819	0.224251	0.309755
21	4380	0.282922	0.20363	0.192354	0.261272	0.282922

## Sheet: WT-1011-C5
		Raw Data
	Time_(sec)	Roi1	Roi2	Roi3	Roi4	Roi5	Ref_fluo	Background
1	0	1937828	1937074	1918682	2517711	2136565	1155669093	19520964
2	30	2.03624e+06	1.97393e+06	2.02496e+06	2.46075e+06	2.21863e+06	1.16308e+09	1.94125e+07			Filter out due to large abrupt change or boutons moved.
3	60	2.04603e+06	2.01061e+06	2.02187e+06	2.45362e+06	2.23987e+06	1.16692e+09	1.93928e+07
4	90	2.05857e+06	1.92147e+06	2.05688e+06	2.34922e+06	2.33188e+06	1.16485e+09	1.93898e+07
5	120	2.09768e+06	1.9165e+06	2.05191e+06	2.39433e+06	2.41724e+06	1.14604e+09	1.93033e+07
6	150	2.06472e+06	1.91314e+06	2.01951e+06	2.45542e+06	2.46203e+06	1.13942e+09	1.92843e+07
7	180	2.06676e+06	1.94244e+06	1.88275e+06	2.41931e+06	2.27937e+06	1.14084e+09	1.92332e+07
8	210	1.13861e+06	1.02474e+06	1.2909e+06	1.61164e+06	1.31767e+06	1.11499e+09	1.91768e+07
9	240	1.21698e+06	1.08393e+06	1.37408e+06	1.90433e+06	1.69824e+06	1.14405e+09	1.92585e+07
10	270	1.2418e+06	1.10903e+06	1.50242e+06	2.07816e+06	1.73282e+06	1.13189e+09	1.92224e+07
11	300	1.24476e+06	1.08177e+06	1.59337e+06	2.04803e+06	1.75279e+06	1.12165e+09	1.93212e+07
12	330	1.25691e+06	1.15231e+06	1.72787e+06	2.03281e+06	1.79528e+06	1.12485e+09	1.92414e+07
13	360	1.28313e+06	1.22911e+06	1.65678e+06	2.0268e+06	1.85494e+06	1.12997e+09	1.91882e+07
14	390	1.29561e+06	1.23143e+06	1.62078e+06	1.98862e+06	1.9206e+06	1.13652e+09	1.9207e+07
15	690	1.38497e+06	1.31852e+06	1.39299e+06	1.37395e+06	1.93237e+06	1.1207e+09	1.91347e+07
16	990	1.45544e+06	1.40642e+06	1.37734e+06	1.51102e+06	2.29277e+06	1.12774e+09	1.91615e+07
17	1290	1.4951e+06	1.60728e+06	1.28517e+06	2.0451e+06	2.2696e+06	1.11403e+09	1.91738e+07
18	1590	1.68792e+06	1.56512e+06	1.27136e+06	1.82972e+06	3.02219e+06	1.12327e+09	1.92725e+07
19	1890	1.71726e+06	1.60335e+06	1.22746e+06	2.30256e+06	2.56986e+06	1.13296e+09	1.92509e+07
20	2190	1.6515e+06	1.58258e+06	1.39896e+06	2.36337e+06	2.25154e+06	1.0874e+09	1.90851e+07
21	2490	1.88834e+06	1.42209e+06	1.3852e+06	1.76019e+06	2.11394e+06	1.11605e+09	1.91456e+07
22	2790	1.90693e+06	1.45785e+06	1.34024e+06	1.6926e+06	2.34816e+06	1.12098e+09	1.91892e+07
23	3090	1.90156e+06	1.5193e+06	1.45576e+06	1.76278e+06	2.34215e+06	1.12938e+09	1.92973e+07
24	3390	1.70404e+06	1.5078e+06	1.2713e+06	1.89574e+06	2.50274e+06	1.13798e+09	1.92708e+07
25	3690	1.62577e+06	1.52819e+06	1.24979e+06	1913572	2.70931e+06	1.1255e+09	1.91965e+07
26	3990	1.57239e+06	1.66485e+06	1.56794e+06	2.00275e+06	2.57655e+06	1.13188e+09	1.91131e+07
27	4290	1.60274e+06	1.81227e+06	1.29504e+06	1.91314e+06	2.17596e+06	1.1248e+09	1.92008e+07
28	4590	1.61356e+06	1.6986e+06	1.318e+06	1.68828e+06	2.60876e+06	1.12403e+09	1.92192e+07
		Background corrected Data
	Time_(sec)	Roi1-bkgd-corr	Roi2-bkgd-corr	Roi3-bkgd-corr	Roi4-bkgd-corr	Roi5-bkgd-corr	Ref_fluo-bkgd-corr
1	0	1.18485e+06	1.1841e+06	1.1657e+06	1.76473e+06	1.38359e+06	7.09802e+08
2	30	1.28744e+06	1.22513e+06	1.27616e+06	1.71196e+06	1.46984e+06	7.19693e+08
3	60	1.298e+06	1.26258e+06	1.27383e+06	1.70558e+06	1.49184e+06	7.23979e+08
4	90	1.31065e+06	1.17356e+06	1.30896e+06	1.6013e+06	1.58396e+06	7.21981e+08
5	120	1.3531e+06	1.17192e+06	1.30733e+06	1.64975e+06	1.67266e+06	7.05143e+08
6	150	1.32087e+06	1.16929e+06	1.27566e+06	1.71158e+06	1.71818e+06	6.98962e+08
7	180	1.32488e+06	1.20056e+06	1.14087e+06	1.67743e+06	1.53749e+06	7.01544e+08
8	210	398906	285033	551191	871938	577968	6.76988e+08
9	240	474122	341079	631231	1.16147e+06	955382	7.04182e+08
10	270	500332	367569	760957	1.33669e+06	991360	6.92837e+08
11	300	499488	336495	848096	1.30275e+06	1.00752e+06	6.8035e+08
12	330	514712	410120	985678	1.29062e+06	1.05309e+06	6.85367e+08
13	360	542983	488968	916637	1.28666e+06	1.1148e+06	6.917e+08
14	390	554744	490564	879908	1.24775e+06	1.17974e+06	6.97824e+08
15	690	646890	580443	654909	635869	1.19429e+06	6.83656e+08
16	990	716324	667309	638223	771906	1.55365e+06	6.90082e+08
17	1290	755513	867699	545585	1.30551e+06	1.53001e+06	6.76094e+08
18	1590	944526	821731	527962	1.08633e+06	2.2788e+06	6.83082e+08
19	1890	974698	860786	484894	1.56e+06	1.8273e+06	6.93261e+08
20	2190	915330	846414	662788	1.62721e+06	1.51538e+06	6.51486e+08
21	2490	1.14984e+06	683592	646705	1.0217e+06	1.37544e+06	6.78754e+08
22	2790	1.16675e+06	717669	600057	952418	1.60798e+06	6.8269e+08
23	3090	1.15721e+06	774953	711405	1.01843e+06	1.5978e+06	6.88621e+08
24	3390	960709	764468	527973	1.15241e+06	1.75941e+06	6.97822e+08
25	3690	885307	787729	509325	1.17311e+06	1.96884e+06	6.87042e+08
26	3990	835148	927601	830698	1.26551e+06	1.83931e+06	6.95333e+08
27	4290	862111	1.07164e+06	554412	1.17251e+06	1.43533e+06	6.86247e+08
28	4590	872220	957265	576667	946941	1.86743e+06	6.85052e+08
		Bleaching Corrected Data
	Time_(sec)	Roi1-bkgd_bleach-corr	Roi2-bkgd_bleach-corr	Roi3-bkgd_bleach-corr	Roi4-bkgd_bleach-corr	Roi5-bkgd_bleach-corr
1	0	0.002	0.002	0.002	0.002	0.002
2	30	0.002	0.002	0.002	0.002	0.002
3	60	0.002	0.002	0.002	0.002	0.002
4	90	0.002	0.002	0.002	0.002	0.002
5	120	0.002	0.002	0.002	0.002	0.002
6	150	0.002	0.002	0.002	0.002	0.002
7	180	0.002	0.002	0.002	0.002	0.002
8	210	0.0005892	0.000421	0.0008142	0.001	0.0008537
9	240	0.0006733	0.0004844	0.0008964	0.002	0.001
10	270	0.0007221	0.0005305	0.001	0.002	0.001
11	300	0.0007342	0.0004946	0.001	0.002	0.001
12	330	0.000751	0.0005984	0.001	0.002	0.002
13	360	0.000785	0.0007069	0.001	0.002	0.002
14	390	0.000795	0.000703	0.001	0.002	0.002
15	690	0.0009462	0.000849	0.000958	0.0009301	0.002
16	990	0.001	0.000967	0.0009249	0.001	0.002
17	1290	0.001	0.001	0.000807	0.002	0.002
18	1590	0.001	0.001	0.0007729	0.002	0.003
19	1890	0.001	0.001	0.0006994	0.002	0.003
20	2190	0.001	0.001	0.001	0.002	0.002
21	2490	0.002	0.001	0.0009528	0.002	0.002
22	2790	0.002	0.001	0.000879	0.001	0.002
23	3090	0.002	0.001	0.001	0.001	0.002
24	3390	0.001	0.001	0.0007566	0.002	0.003
25	3690	0.001	0.001	0.0007413	0.002	0.003
26	3990	0.001	0.001	0.001	0.002	0.003
27	4290	0.001	0.002	0.0008079	0.002	0.002
28	4590	0.001	0.001	0.0008418	0.001	0.003
		Normalized Data
	Time_(sec)	Roi1_corr_norm	Roi2_corr_norm	Roi3_corr_norm	Roi4_corr_norm	Roi5_corr_norm
1	0	1	1	1	1	1
2	30	1.06096	1.02616	1.05265	0.954516	1.07852
3	60	1.08995	1.02706	1.05332	0.947117	1.07846
4	90	1.06027	0.983108	1.0403	0.965591	1.04991
5	120	1.11706	1.02118	1.06723	1.04069	1.19476
6	150	1.10452	1.03004	1.07672	1.02424	1.20877
7	180	1.14006	1.03477	0.991659	1.0052	1.12583
8	210	0.474159	0.313387	0.56611	0.588138	0.519884
9	240	0.47884	0.345103	0.607715	0.691493	0.758803
10	270	0.520685	0.386119	0.697795	0.827908	0.78257
11	300	0.526975	0.375531	0.797501	0.849611	0.820205
12	330	0.547205	0.437128	0.873016	0.824926	0.828215
13	360	0.559253	0.499144	0.821395	0.832564	0.844228
14	390	0.592926	0.469173	0.8431	0.830831	0.89734
15	690	0.732261	0.552648	0.675196	0.654225	0.923484
16	990	0.751475	0.686329	0.665537	0.717476	1.19373
17	1290	0.800215	0.815623	0.613811	0.909277	1.12756
18	1590	0.984502	0.767405	0.631027	0.830347	1.50747
19	1890	0.999067	0.797163	0.524419	0.935171	1.28611
20	2190	1.06432	0.85522	0.793937	1.03435	1.19837
21	2490	1.17889	0.630685	0.702213	0.820829	1.06772
22	2790	1.19543	0.629009	0.707567	0.794191	1.28062
23	3090	1.17849	0.685573	0.804223	0.759716	1.25
24	3390	1.02103	0.673255	0.617373	0.735716	1.33068
25	3690	0.936809	0.737437	0.600743	0.719853	1.47365
26	3990	0.909117	0.820068	0.759947	0.777409	1.35242
27	4290	0.828958	0.957813	0.659506	0.782182	1.29576
28	4590	0.931593	0.89059	0.705786	0.672023	1.42233
		Normalize the bouton fluorescent right after bleaching to 0
	Recovery Time_(sec)
1	0	0	0	0	0	0
2	30	0.00770317	0.0450455	0.0877448	0.25652	0.408204
3	60	0.0765643	0.1033	0.277723	0.595092	0.448811
4	90	0.0869153	0.0882617	0.488003	0.648957	0.513112
5	120	0.120206	0.175747	0.647264	0.587691	0.526797
6	150	0.140033	0.263827	0.538395	0.606648	0.554156
7	180	0.195446	0.221259	0.584171	0.602346	0.6449
8	480	0.424739	0.339817	0.230062	0.164023	0.689569
9	780	0.456358	0.529681	0.209691	0.321007	1.15129
10	1080	0.536566	0.713315	0.100601	0.797044	1.03823
11	1380	0.839833	0.644832	0.13691	0.601145	1.68733
12	1680	0.863801	0.687096	-0.0879261	0.861311	1.30912
13	1980	0.971188	0.769553	0.480486	1.10746	1.15922
14	2280	1.15972	0.450651	0.287041	0.577522	0.935999
15	2580	1.18693	0.448271	0.298332	0.511409	1.29975
16	2880	1.15906	0.528607	0.502179	0.425844	1.24743
17	3180	0.899947	0.511112	0.108113	0.366278	1.38528
18	3480	0.761348	0.602269	0.0730409	0.326907	1.62955
19	3780	0.715777	0.719628	0.408801	0.469757	1.42242
20	4080	0.583866	0.915264	0.196972	0.481603	1.32562
21	4380	0.752764	0.819788	0.294576	0.208196	1.54188

## Sheet: WT-1012-C1
		Raw Data
	Time_(sec)	Roi1	Roi2	Roi3	Roi4	Roi5	Ref_fluo	Background
1	0	2324278	2283670	3676555	2028642	2823771	1245486785	13664723
2	30	2.29643e+06	2.23902e+06	3.60977e+06	2.06269e+06	2.68434e+06	1.26006e+09	1.37856e+07			Filter out due to large abrupt change or bouton moved.
3	60	2.34028e+06	2.29763e+06	3.79416e+06	2.11492e+06	2.72918e+06	1.26609e+09	1.36925e+07
4	90	2.32409e+06	2.25896e+06	4.10344e+06	2.05963e+06	2.69376e+06	1.23897e+09	1.37196e+07
5	120	2.27434e+06	2.24372e+06	4.18036e+06	2.04227e+06	2.61917e+06	1.23751e+09	1.37177e+07
6	150	2.2583e+06	2.24436e+06	4.09426e+06	2.04698e+06	2.6795e+06	1.24483e+09	1.3659e+07
7	180	2.2577e+06	2.24095e+06	4.0291e+06	2.09917e+06	2.66124e+06	1.22489e+09	1.36662e+07
8	210	1.72584e+06	1.71398e+06	2.40207e+06	1.67846e+06	2.05456e+06	1.20416e+09	1.37743e+07
9	240	1.771e+06	1.7374e+06	2.77671e+06	1.73641e+06	2.19149e+06	1.23165e+09	1.36923e+07
10	270	1.74815e+06	1.79938e+06	2.85294e+06	1.74302e+06	2.29724e+06	1.24509e+09	1.38088e+07
11	300	1.77978e+06	1.77506e+06	2.72323e+06	1.7408e+06	2.24321e+06	1.24957e+09	1.38014e+07
12	330	1.80061e+06	1.78806e+06	2.8213e+06	1.75639e+06	2.28168e+06	1.25338e+09	1.38384e+07
13	360	1.80958e+06	1.87792e+06	2.91947e+06	1.78461e+06	2.27208e+06	1.26716e+09	1.38517e+07
14	390	1.86169e+06	1.88024e+06	3.02443e+06	1.81358e+06	2.26109e+06	1.27113e+09	1.38357e+07
15	690	1.87817e+06	1.78896e+06	2.7678e+06	1.89452e+06	2.39207e+06	1.24866e+09	1.37415e+07
16	990	1.95584e+06	1.87226e+06	2.6514e+06	1.91111e+06	2.25532e+06	1.26032e+09	1.37899e+07
17	1290	1.86738e+06	1.86661e+06	2.5139e+06	1.94439e+06	2.29841e+06	1.24712e+09	1.36333e+07
18	1590	1.88659e+06	1.93555e+06	2.59579e+06	1.95426e+06	2.28903e+06	1.23047e+09	1.36654e+07
19	1890	1.92294e+06	1.91915e+06	3.0709e+06	1.90306e+06	2.47563e+06	1.25616e+09	1.37997e+07
20	2190	1.98202e+06	1.91568e+06	2.97111e+06	1.92128e+06	2.51633e+06	1.23696e+09	1.38686e+07
21	2490	2.01977e+06	2.04554e+06	2.64588e+06	1.96063e+06	2.61025e+06	1.27113e+09	1.38962e+07
22	2790	2.04576e+06	2.09968e+06	2.90196e+06	1.95862e+06	2.57399e+06	1.25518e+09	1.3983e+07
23	3090	2.0391e+06	2.04826e+06	3.15889e+06	2.00039e+06	2.66908e+06	1.26373e+09	1.38565e+07
24	3390	2.05163e+06	2.13019e+06	2.95378e+06	2.00616e+06	2.55565e+06	1.26885e+09	1.39741e+07
25	3690	2.01264e+06	2.22141e+06	2.92284e+06	2.04948e+06	2.74212e+06	1.251e+09	1.38977e+07
26	3990	1.99367e+06	1.97667e+06	2.98666e+06	1.94737e+06	2.48662e+06	1.2657e+09	1.3896e+07
27	4290	2.18806e+06	2.02173e+06	2.85706e+06	2.03343e+06	2.46685e+06	1.24397e+09	1.38632e+07
28	4590	2.06544e+06	1.95697e+06	2.58795e+06	1.99037e+06	2.70003e+06	1.24056e+09	1.38595e+07
		Background corrected Data
	Time_(sec)	Roi1-bkgd-corr	Roi2-bkgd-corr	Roi3-bkgd-corr	Roi4-bkgd-corr	Roi5-bkgd-corr	Ref_fluo-bkgd-corr
1	0	801637	761029	2.15391e+06	506001	1.30113e+06	6.32019e+08
2	30	760321	702908	2.07365e+06	526582	1.14823e+06	6.4116e+08
3	60	814546	771896	2.26842e+06	589182	1.20345e+06	6.51374e+08
4	90	795335	730202	2.57469e+06	530875	1.165e+06	6.23037e+08
5	120	745796	715180	2.65182e+06	513731	1.09063e+06	6.21669e+08
6	150	736301	722355	2.57225e+06	524975	1.1575e+06	6.31616e+08
7	180	734894	718141	2.50629e+06	576359	1.13843e+06	6.11351e+08
8	210	190990	179123	867214	143604	519710	5.85768e+08
9	240	245284	211688	1.251e+06	210697	665780	6.16948e+08
10	270	209456	260678	1.31424e+06	204320	758546	6.25151e+08
11	300	241908	237190	1.18536e+06	202928	705336	6.29967e+08
12	330	258613	246067	1.2793e+06	214394	739686	6.3211e+08
13	360	266099	334446	1.376e+06	241136	728605	6.45292e+08
14	390	320000	338546	1.48274e+06	271891	719404	6.49982e+08
15	690	346973	257771	1.23661e+06	363324	860881	6.31748e+08
16	990	419245	335665	1.11481e+06	374519	718729	6.41228e+08
17	1290	348237	347470	994751	425246	779261	6.35064e+08
18	1590	363878	412834	1.07308e+06	431549	766320	6.1697e+08
19	1890	385264	381471	1.53322e+06	365381	937948	6.36636e+08
20	2190	436666	370323	1.42575e+06	375925	970971	6.14339e+08
21	2490	471343	497105	1.09745e+06	412199	1.06182e+06	6.47271e+08
22	2790	487648	541571	1.34385e+06	400506	1.01588e+06	6.2742e+08
23	3090	495088	504258	1.61488e+06	456384	1.12507e+06	6.41648e+08
24	3390	494515	573072	1.39666e+06	449039	998529	6.41494e+08
25	3690	464043	672806	1.37424e+06	500876	1.19352e+06	6.27077e+08
26	3990	445251	428249	1.43825e+06	398955	938202	6.41851e+08
27	4290	643300	476974	1.3123e+06	488667	922087	6.21589e+08
28	4590	521100	412627	1.04361e+06	446033	1.15569e+06	6.18354e+08
		Bleaching Corrected Data
	Time_(sec)	Roi1-bkgd_bleach-corr	Roi2-bkgd_bleach-corr	Roi3-bkgd_bleach-corr	Roi4-bkgd_bleach-corr	Roi5-bkgd_bleach-corr
1	0	0.001	0.001	0.003	0.0008006	0.002
2	30	0.001	0.001	0.003	0.0008213	0.002
3	60	0.001	0.001	0.003	0.0009045	0.002
4	90	0.001	0.001	0.004	0.0008521	0.002
5	120	0.001	0.001	0.004	0.0008264	0.002
6	150	0.001	0.001	0.004	0.0008312	0.002
7	180	0.001	0.001	0.004	0.0009428	0.002
8	210	0.0003261	0.0003058	0.001	0.0002452	0.0008872
9	240	0.0003976	0.0003431	0.002	0.0003415	0.001
10	270	0.000335	0.000417	0.002	0.0003268	0.001
11	300	0.000384	0.0003765	0.002	0.0003221	0.001
12	330	0.0004091	0.0003893	0.002	0.0003392	0.001
13	360	0.0004124	0.0005183	0.002	0.0003737	0.001
14	390	0.0004923	0.0005209	0.002	0.0004183	0.001
15	690	0.0005492	0.000408	0.002	0.0005751	0.001
16	990	0.0006538	0.0005235	0.002	0.0005841	0.001
17	1290	0.0005483	0.0005471	0.002	0.0006696	0.001
18	1590	0.0005898	0.0006691	0.002	0.0006995	0.001
19	1890	0.0006052	0.0005992	0.002	0.0005739	0.001
20	2190	0.0007108	0.0006028	0.002	0.0006119	0.002
21	2490	0.0007282	0.000768	0.002	0.0006368	0.002
22	2790	0.0007772	0.0008632	0.002	0.0006383	0.002
23	3090	0.0007716	0.0007859	0.003	0.0007113	0.002
24	3390	0.0007709	0.0008933	0.002	0.0007	0.002
25	3690	0.00074	0.001	0.002	0.0007987	0.002
26	3990	0.0006937	0.0006672	0.002	0.0006216	0.001
27	4290	0.001	0.0007673	0.002	0.0007862	0.001
28	4590	0.0008427	0.0006673	0.002	0.0007213	0.002
		Normalized Data
	Time_(sec)	Roi1_corr_norm	Roi2_corr_norm	Roi3_corr_norm	Roi4_corr_norm	Roi5_corr_norm
1	0	1	1	1	1	1
2	30	0.935	0.91	0.949	1.026	0.87
3	60	0.986	0.984	1.022	1.13	0.897
4	90	1.006	0.973	1.213	1.064	0.908
5	120	0.946	0.955	1.252	1.032	0.852
6	150	0.919	0.95	1.195	1.038	0.89
7	180	0.948	0.976	1.203	1.178	0.905
8	210	0.257	0.254	0.434	0.306	0.431
9	240	0.313	0.285	0.595	0.427	0.524
10	270	0.264	0.346	0.617	0.408	0.589
11	300	0.303	0.313	0.552	0.402	0.544
12	330	0.323	0.323	0.594	0.424	0.568
13	360	0.325	0.43	0.626	0.467	0.548
14	390	0.388	0.433	0.669	0.522	0.538
15	690	0.433	0.339	0.574	0.718	0.662
16	990	0.515	0.435	0.51	0.73	0.544
17	1290	0.432	0.454	0.46	0.836	0.596
18	1590	0.465	0.556	0.51	0.874	0.603
19	1890	0.477	0.498	0.707	0.717	0.716
20	2190	0.56	0.501	0.681	0.764	0.768
21	2490	0.574	0.638	0.498	0.795	0.797
22	2790	0.613	0.717	0.628	0.797	0.786
23	3090	0.608	0.653	0.738	0.888	0.852
24	3390	0.608	0.742	0.639	0.874	0.756
25	3690	0.583	0.891	0.643	0.998	0.925
26	3990	0.547	0.554	0.658	0.776	0.71
27	4290	0.816	0.637	0.619	0.982	0.721
28	4590	0.664	0.554	0.495	0.901	0.908
		Normalize the bouton fluorescent right after bleaching to 0
	Recovery Time_(sec)
1	0	0	0	0	0	0
2	30	0.196974	0.043662	0.234987	0.159031	0.196974
3	60	0.334644	0.129577	0.267098	0.134059	0.334644
4	90	0.239334	0.0830986	0.172227	0.126173	0.239334
5	120	0.290166	0.0971831	0.233528	0.155088	0.290166
6	150	0.247806	0.247887	0.280234	0.211603	0.247806
7	180	0.226626	0.252113	0.342994	0.28389	0.226626
8	480	0.489259	0.119718	0.204337	0.541495	0.489259
9	780	0.239334	0.25493	0.110926	0.557266	0.239334
10	1080	0.34947	0.28169	0.0379483	0.696583	0.34947
11	1380	0.364297	0.425352	0.110926	0.746526	0.364297
12	1680	0.603631	0.343662	0.398457	0.54018	0.603631
13	1980	0.713767	0.347887	0.360509	0.601953	0.713767
14	2280	0.775189	0.540845	0.0934112	0.642696	0.775189
15	2580	0.751891	0.652113	0.283153	0.645325	0.751891
16	2880	0.891679	0.561972	0.443703	0.764927	0.891679
17	3180	0.688351	0.687324	0.299208	0.746526	0.688351
18	3480	1.04629	0.897183	0.305046	0.909501	1.04629
19	3780	0.590923	0.422535	0.326939	0.617724	0.590923
20	4080	0.614221	0.539437	0.270017	0.888472	0.614221
21	4380	1.01029	0.422535	0.0890325	0.782013	1.01029

## Sheet: WT-0128-C1
		Raw Data
	Time_(sec)	Roi1	Roi2	Roi3	Roi4	Roi5	Ref_fluo	Background
1	0	3022167	3959263	2588913	3725838	3597220	739858989	3.04447e+07
2	30	3.0636e+06	4.04271e+06	2.63411e+06	3.73875e+06	3.5449e+06	7.37721e+08	3.05424e+07			Filter out due to large abrupt change.
3	60	3.08673e+06	4.06283e+06	2.67742e+06	3.64549e+06	3.56635e+06	7.43811e+08	3.07024e+07
4	90	3.08942e+06	4.0857e+06	2.61453e+06	3.65109e+06	3.52277e+06	7.42245e+08	3.05616e+07
5	120	3.05674e+06	4.24462e+06	2.60774e+06	3.66154e+06	3.39858e+06	7.37955e+08	3.04837e+07
6	150	3.07962e+06	4.17466e+06	2.51616e+06	3.61369e+06	3.3171e+06	730458581	3.05613e+07
7	180	3.08012e+06	4.25911e+06	2.57488e+06	3.61562e+06	3.27909e+06	7.31996e+08	3.07581e+07
8	210	1.42923e+06	2.10547e+06	1.31132e+06	1.69865e+06	1.96281e+06	7.09419e+08	3.05741e+07
9	240	1.50312e+06	2.52977e+06	1.46626e+06	1.91231e+06	2.23799e+06	7.25821e+08	3.09864e+07
10	270	1.59162e+06	2.7939e+06	1.4961e+06	1.90553e+06	2.36042e+06	7.25445e+08	3.07404e+07
11	300	1.64838e+06	2.8943e+06	1.4741e+06	1.90492e+06	2.24599e+06	7.25232e+08	3.10171e+07
12	330	1.71698e+06	2.91304e+06	1.51936e+06	1.88818e+06	2.334e+06	7.29889e+08	3.07724e+07
13	360	1.69475e+06	2.88475e+06	1.57986e+06	1.89364e+06	2.30143e+06	7.26482e+08	3.09134e+07
14	390	1.7361e+06	2.90898e+06	1.61608e+06	2.00113e+06	2.26591e+06	7.28328e+08	3.11675e+07
15	690	1.86007e+06	3.47301e+06	1.76329e+06	2.10122e+06	2.51084e+06	7.32918e+08	3.09191e+07
16	990	1.80582e+06	3.4965e+06	1.74357e+06	2.08331e+06	2.3051e+06	7.27711e+08	3.06406e+07
17	1290	1.86069e+06	4.17181e+06	1.9121e+06	2.14652e+06	2.60325e+06	7.20014e+08	3.0576e+07
18	1590	1.92775e+06	4.27476e+06	1.98252e+06	2.15266e+06	2.78595e+06	7.22917e+08	3.0593e+07
19	1890	2.05396e+06	4.38469e+06	1.93527e+06	2.37921e+06	3.05049e+06	7.23883e+08	3.11168e+07
20	2190	2.11766e+06	4.48377e+06	2.00742e+06	2.2403e+06	3.12834e+06	7.22348e+08	3.09777e+07
21	2490	2.19881e+06	4.621e+06	2.05065e+06	2.2619e+06	3.0159e+06	7.18091e+08	3.15049e+07
22	2790	2.21616e+06	4.51857e+06	2.06309e+06	2.37715e+06	3.03236e+06	7.12233e+08	3.19007e+07
23	3090	2.21437e+06	4.3788e+06	1.99934e+06	2.17182e+06	3.13574e+06	7.18419e+08	3.1466e+07
24	3390	2.30493e+06	4.41302e+06	2.08339e+06	2.25699e+06	3.08275e+06	7.26177e+08	3.12445e+07
25	3690	2.34832e+06	4.08669e+06	2.13476e+06	2.37894e+06	2.82298e+06	7.2061e+08	3.08344e+07
26	3990	2.27444e+06	4.78521e+06	1.99713e+06	2.29076e+06	3.07958e+06	7.14736e+08	3.07671e+07
27	4290	2.42571e+06	4.23868e+06	2.04283e+06	2.2725e+06	3.02894e+06	7.2138e+08	3.0951e+07
28	4590	2.41843e+06	4.57208e+06	2.14985e+06	2.28021e+06	2.84324e+06	7.16854e+08	3.09345e+07	1.43526e+06	3.58892e+06	1.16669e+06	1.29705e+06	1.86007e+06	4.56992e+08	0.00314067	0.00785335	0.00255298	0.00283823	0.00407025	0.740026	1.27083	0.762297	0.498149	0.749329
		Background corrected Data
	Time_(sec)	Roi1-bkgd-corr	Roi2-bkgd-corr	Roi3-bkgd-corr	Roi4-bkgd-corr	Roi5-bkgd-corr	Ref_fluo-bkgd-corr
1	0	2.05457e+06	2.99167e+06	1.62132e+06	2.75824e+06	2.62962e+06	4.84111e+08
2	30	2.0929e+06	3.07201e+06	1.66341e+06	2.76806e+06	2.5742e+06	4.81153e+08
3	60	2.11095e+06	3.08704e+06	1.70163e+06	2.66971e+06	2.59056e+06	4.85899e+08
4	90	2.11811e+06	3.11439e+06	1.64322e+06	2.67978e+06	2.55146e+06	4.85515e+08
5	120	2.08791e+06	3.27579e+06	1.6389e+06	2.69271e+06	2.42974e+06	4.8188e+08
6	150	2.10832e+06	3.20336e+06	1.54486e+06	2.64239e+06	2.3458e+06	4.73731e+08
7	180	2.10256e+06	3.28155e+06	1.59733e+06	2.63806e+06	2.30154e+06	4.73616e+08
8	210	457522	1.13376e+06	339606	726940	991105	4.52584e+08
9	240	518304	1.54496e+06	481450	927493	1.25318e+06	4.65523e+08
10	270	614630	1.8169e+06	519105	928536	1.38342e+06	4.67213e+08
11	300	662589	1.90852e+06	488312	919132	1.2602e+06	4.64677e+08
12	330	738968	1.93503e+06	541346	910164	1.35599e+06	4.71388e+08
13	360	712258	1.90226e+06	597364	911152	1.31893e+06	4.66797e+08
14	390	745534	1.91841e+06	625516	1.01057e+06	1.27535e+06	4.66508e+08
15	690	877393	2.49033e+06	780617	1.11855e+06	1.52817e+06	4.73185e+08
16	990	831997	2.52268e+06	769746	1.10949e+06	1.33128e+06	4.70318e+08
17	1290	888918	3.20004e+06	940337	1.17475e+06	1.63148e+06	4.63163e+08
18	1590	955439	3.30246e+06	1.01021e+06	1.18035e+06	1.81364e+06	4.65924e+08
19	1890	1.06501e+06	3.39573e+06	946312	1.39025e+06	2.06153e+06	4.6249e+08
20	2190	1.13312e+06	3.49923e+06	1.02289e+06	1.25577e+06	2.1438e+06	4.62123e+08
21	2490	1.19752e+06	3.61971e+06	1.04936e+06	1.26061e+06	2.01461e+06	4.53438e+08
22	2790	1.20229e+06	3.5047e+06	1.04922e+06	1.36327e+06	2.01849e+06	4.44255e+08
23	3090	1.21432e+06	3.37874e+06	999288	1.17177e+06	2.13569e+06	4.54092e+08
24	3390	1.31191e+06	3.42e+06	1.09037e+06	1.26397e+06	2.08974e+06	4.63711e+08
25	3690	1.36834e+06	3.10671e+06	1.15478e+06	1.39896e+06	1.843e+06	4.61589e+08
26	3990	1.2966e+06	3.80737e+06	1.01929e+06	1.31292e+06	2.10174e+06	4.5628e+08
27	4290	1.44202e+06	3.255e+06	1.05914e+06	1.28881e+06	2.04525e+06	4.61379e+08
28	4590	1.43526e+06	3.58892e+06	1.16669e+06	1.29705e+06	1.86007e+06	4.56992e+08
		Bleaching Corrected Data
	Time_(sec)	Roi1-bkgd_bleach-corr	Roi2-bkgd_bleach-corr	Roi3-bkgd_bleach-corr	Roi4-bkgd_bleach-corr	Roi5-bkgd_bleach-corr
1	0	0.00424401	0.00617971	0.00334906	0.00569754	0.00543186
2	30	0.00434976	0.00638468	0.00345713	0.00575296	0.00535007
3	60	0.00434442	0.00635325	0.00350202	0.00549436	0.00533148
4	90	0.00436261	0.00641461	0.00338449	0.00551945	0.00525516
5	120	0.00433284	0.00679793	0.00340106	0.00558792	0.00504221
6	150	0.00445045	0.00676197	0.00326104	0.00557783	0.00495175
7	180	0.00443938	0.00692871	0.00337262	0.00557005	0.0048595
8	210	0.00101091	0.00250508	0.000750372	0.0016062	0.00218988
9	240	0.00111338	0.00331876	0.00103421	0.00199237	0.00269199
10	270	0.00131552	0.00388881	0.00111107	0.00198739	0.00296101
11	300	0.00142591	0.00410719	0.00105086	0.001978	0.00271199
12	330	0.00156764	0.00410496	0.00114841	0.00193082	0.0028766
13	360	0.00152584	0.00407513	0.00127971	0.00195192	0.0028255
14	390	0.00159811	0.00411227	0.00134085	0.00216623	0.00273381
15	690	0.00185423	0.00526292	0.00164971	0.00236387	0.00322953
16	990	0.00176901	0.00536378	0.00163665	0.00235901	0.0028306
17	1290	0.00191923	0.0069091	0.00203025	0.00253636	0.00352248
18	1590	0.00205063	0.00708797	0.00216819	0.00253335	0.00389257
19	1890	0.00230277	0.00734228	0.00204612	0.00300601	0.00445746
20	2190	0.002452	0.00757209	0.00221346	0.00271739	0.00463903
21	2490	0.00264098	0.00798281	0.00231424	0.00278012	0.00444297
22	2790	0.0027063	0.00788895	0.00236175	0.00306868	0.00454355
23	3090	0.00267417	0.00744065	0.00220063	0.00258047	0.0047032
24	3390	0.00282916	0.0073753	0.00235141	0.00272578	0.00450655
25	3690	0.00296441	0.00673047	0.00250175	0.00303075	0.00399272
26	3990	0.00284168	0.00834438	0.00223391	0.00287744	0.00460626
27	4290	0.00312545	0.00705493	0.0022956	0.00279338	0.00443291
28	4590	0.00314067	0.00785335	0.00255298	0.00283823	0.00407025
		Normalized Data
	Time_(sec)	Roi1_corr_norm	Roi2_corr_norm	Roi3_corr_norm	Roi4_corr_norm	Roi5_corr_norm
1	0	1	1	1	1	1
2	30	1.02492	1.03317	1.03227	1.00973	0.984942
3	60	1.02366	1.02808	1.04567	0.964339	0.98152
4	90	1.02795	1.03801	1.01058	0.968743	0.96747
5	120	1.02093	1.10004	1.01553	0.98076	0.928266
6	150	1.04864	1.09422	0.973718	0.978989	0.911613
7	180	1.04604	1.1212	1.00704	0.977623	0.894628
8	210	0.238198	0.405371	0.224055	0.281911	0.403155
9	240	0.262342	0.537041	0.308807	0.349689	0.495592
10	270	0.309972	0.629287	0.331755	0.348816	0.545119
11	300	0.335983	0.664625	0.313779	0.347168	0.499275
12	330	0.369378	0.664264	0.342905	0.338886	0.529578
13	360	0.359529	0.659436	0.38211	0.342591	0.520171
14	390	0.376558	0.665448	0.400365	0.380205	0.503293
15	690	0.436905	0.851645	0.492588	0.414894	0.594554
16	990	0.416825	0.867966	0.488689	0.414041	0.52111
17	1290	0.452222	1.11803	0.606215	0.445167	0.648486
18	1590	0.483184	1.14697	0.647402	0.444639	0.716619
19	1890	0.542593	1.18813	0.610955	0.527599	0.820615
20	2190	0.577755	1.22531	0.660919	0.476941	0.854041
21	2490	0.622285	1.29178	0.691012	0.48795	0.817947
22	2790	0.637676	1.27659	0.705199	0.538598	0.836463
23	3090	0.630105	1.20405	0.657089	0.452909	0.865855
24	3390	0.666625	1.19347	0.702111	0.478414	0.829652
25	3690	0.698493	1.08912	0.747002	0.531941	0.735057
26	3990	0.669574	1.35029	0.667025	0.505032	0.848007
27	4290	0.73644	1.14163	0.685446	0.490279	0.816095
28	4590	0.740026	1.27083	0.762297	0.498149	0.749329
		Normalize the bouton fluorescent right after bleaching to 0
	Recovery Time_(sec)
1	0	0	0	0	0	0
2	30	0.0305911	0.201367	0.107545	0.0966917	0.168227
3	60	0.0909398	0.342443	0.136665	0.0954459	0.258361
4	90	0.123897	0.396488	0.113855	0.0930947	0.174929
5	120	0.166209	0.395937	0.150814	0.08128	0.230078
6	150	0.153729	0.388553	0.200563	0.0865651	0.212958
7	180	0.175306	0.397746	0.223728	0.140225	0.18224
8	480	0.251768	0.682505	0.340753	0.189711	0.348327
9	780	0.226325	0.707466	0.335805	0.188495	0.214667
10	1080	0.271174	1.0899	0.484938	0.2329	0.446478
11	1380	0.310403	1.13417	0.537202	0.232146	0.570475
12	1680	0.385677	1.1971	0.490953	0.350496	0.759737
13	1980	0.430228	1.25397	0.554354	0.278228	0.820569
14	2280	0.486649	1.35562	0.59254	0.293933	0.754882
15	2580	0.506149	1.33239	0.610543	0.366186	0.78858
16	2880	0.496556	1.22145	0.549494	0.243944	0.84207
17	3180	0.542828	1.20527	0.606625	0.280329	0.776184
18	3480	0.583206	1.04569	0.663588	0.35669	0.604029
19	3780	0.546565	1.4451	0.562102	0.318302	0.809589
20	4080	0.631285	1.12599	0.585478	0.297255	0.751512
21	4380	0.635829	1.32358	0.682996	0.308483	0.630005

## Sheet: WT-0129-C2
		Raw Data
	Time_(sec)	Roi1	Roi2	Roi3	Roi4	Roi5	Ref_fluo	Background
1	0	2454911	2291082	1968982	2081738	2054615	690316712	48446638
2	30	2.59039e+06	2.11653e+06	2.00556e+06	2.04275e+06	1.96563e+06	6.8693e+08	4.8653e+07			Filter out due to large abrupt change.
3	60	2.68284e+06	2.25667e+06	2.01205e+06	2.12794e+06	2.13767e+06	6.93073e+08	4.86267e+07
4	90	2.64924e+06	2.33509e+06	1.88786e+06	2.04531e+06	2.01269e+06	6.87393e+08	4.84285e+07
5	120	2.7526e+06	2.27031e+06	1.84264e+06	1.98243e+06	2.0211e+06	6.84658e+08	4.81601e+07
6	150	2.69368e+06	2.25556e+06	1.96635e+06	1.9811e+06	1.86275e+06	6.86354e+08	4.84047e+07
7	180	2.59936e+06	2.18377e+06	1.95303e+06	2.07391e+06	1.80136e+06	6.86763e+08	4.82375e+07
8	210	1.27807e+06	1.35463e+06	1.15488e+06	1.42524e+06	1.22404e+06	6.75243e+08	4.8298e+07
9	240	1.41989e+06	1.58651e+06	1.21154e+06	1.50564e+06	1.44622e+06	6.89877e+08	4.84972e+07
10	270	1.44692e+06	1.57143e+06	1.355e+06	1.51863e+06	1.46829e+06	6.89498e+08	4.84324e+07
11	300	1.44998e+06	1.6096e+06	1.51127e+06	1.49146e+06	1.50648e+06	6.87939e+08	4.82761e+07
12	330	1.48592e+06	1.64326e+06	1.50766e+06	1.46061e+06	1.5949e+06	6.864e+08	4.82783e+07
13	360	1.48785e+06	1.59778e+06	1.52441e+06	1.51252e+06	1.65939e+06	6.84919e+08	4.8362e+07
14	390	1.54513e+06	1.60246e+06	1.47446e+06	1.66222e+06	1.71235e+06	6.8983e+08	4.85834e+07
15	690	1.70449e+06	1.63411e+06	1.56567e+06	1.64117e+06	1.61692e+06	6.80218e+08	4.84795e+07
16	990	1.80182e+06	1.54445e+06	1.59622e+06	1.68348e+06	1.47828e+06	6.80265e+08	4.83316e+07
17	1290	1.90266e+06	1.59546e+06	1.53995e+06	1.81877e+06	1.78386e+06	6.76267e+08	4.81252e+07
18	1590	1.78938e+06	1.58413e+06	1.5108e+06	1.69556e+06	1.52074e+06	6.71664e+08	4.79967e+07
19	1890	1.7783e+06	1.89249e+06	1.6196e+06	1.59031e+06	1.51391e+06	6.75274e+08	4.80958e+07
20	2190	1.66553e+06	1.77411e+06	1.56571e+06	1.58218e+06	1.67082e+06	6.72752e+08	4.7978e+07
21	2490	1.78677e+06	1.71742e+06	1.57562e+06	1.55218e+06	1.54659e+06	6.61726e+08	4.76665e+07
22	2790	2.09088e+06	1.8616e+06	1.6356e+06	1.5968e+06	1.64393e+06	6.73073e+08	4.79028e+07
23	3090	2.15663e+06	1.71109e+06	1.73822e+06	1.56943e+06	1.79007e+06	6.75438e+08	4.80035e+07
24	3390	2.09509e+06	1.77593e+06	1.79891e+06	1.72015e+06	1.65888e+06	6.8064e+08	4.80692e+07
25	3690	2.18777e+06	1.93991e+06	1.82917e+06	1.79345e+06	1.63139e+06	6.83182e+08	4.80903e+07
26	3990	2.34219e+06	1.79606e+06	1.72941e+06	1.80038e+06	1.74369e+06	6.75203e+08	4.80139e+07
27	4290	2.4958e+06	1.80531e+06	1.70349e+06	1.98602e+06	1.79017e+06	6.79741e+08	4.79717e+07
28	4590	2.2671e+06	1.8266e+06	1.76215e+06	1.908e+06	1.52511e+06	6.75833e+08	4.8399e+07
		Background corrected Data
	Time_(sec)	Roi1-bkgd-corr	Roi2-bkgd-corr	Roi3-bkgd-corr	Roi4-bkgd-corr	Roi5-bkgd-corr	Ref_fluo-bkgd-corr
1	0	1.4573e+06	1.29347e+06	1.04263e+06	1.08412e+06	1.057e+06	3.17512e+08
2	30	1.58852e+06	1.11467e+06	1.07526e+06	1.04088e+06	963764	3.12537e+08
3	60	1.68152e+06	1.25535e+06	1.08225e+06	1.12662e+06	1.13634e+06	3.18883e+08
4	90	1.652e+06	1.33785e+06	961850	1.04807e+06	1.01545e+06	3.14728e+08
5	120	1.76089e+06	1.2786e+06	921763	990718	1.02939e+06	3.14058e+08
6	150	1.69693e+06	1.25881e+06	1.0408e+06	984347	866004	3.13872e+08
7	180	1.60605e+06	1.19046e+06	1.03067e+06	1.0806e+06	808056	3.15567e+08
8	210	283522	360081	231366	430691	229482	3.03582e+08
9	240	421234	587852	284216	506987	447560	3.16683e+08
10	270	449597	574109	428913	521313	470966	3.16803e+08
11	300	455876	615496	588172	497353	512379	3.16447e+08
12	330	491773	649107	584524	466457	600749	3.14891e+08
13	360	491983	601912	599674	516653	663518	3.12765e+08
14	390	544699	602026	545488	661788	711917	3.15973e+08
15	690	706202	635820	638685	642877	618633	3.07161e+08
16	990	806576	549206	672063	688235	483039	3.08345e+08
17	1290	911669	604468	619738	827776	792866	3.05936e+08
18	1590	801031	595779	593049	707213	532393	3.02321e+08
19	1890	787907	902100	699950	599923	523522	3.05169e+08
20	2190	677565	786151	648314	594219	682855	3.03554e+08
21	2490	805221	735870	664179	570634	565045	2.94925e+08
22	2790	1.10446e+06	875184	719645	610380	657516	3.04453e+08
23	3090	1.16814e+06	722606	820335	580944	801579	3.06044e+08
24	3390	1.10525e+06	786090	879766	730308	669035	3.1074e+08
25	3690	1.19749e+06	949638	909629	803170	641114	3.13119e+08
26	3990	1.35349e+06	807355	811324	811676	754983	3.05728e+08
27	4290	1.50797e+06	817474	786212	998183	802341	3.10591e+08
28	4590	1.27047e+06	829968	836706	911370	528478	3.03395e+08
		Bleaching Corrected Data
	Time_(sec)	Roi1-bkgd_bleach-corr	Roi2-bkgd_bleach-corr	Roi3-bkgd_bleach-corr	Roi4-bkgd_bleach-corr	Roi5-bkgd_bleach-corr
1	0	0.00458974	0.00407376	0.00328374	0.00341444	0.00332901
2	30	0.00508267	0.00356651	0.00344042	0.00333044	0.00308368
3	60	0.00527316	0.00393672	0.0033939	0.00353303	0.00356352
4	90	0.00524897	0.0042508	0.00305613	0.00333007	0.00322645
5	120	0.00560688	0.00407122	0.002935	0.00315457	0.00327771
6	150	0.00540644	0.00401057	0.003316	0.00313614	0.0027591
7	180	0.0050894	0.00377244	0.00326609	0.00342432	0.00256065
8	210	0.000933921	0.00118611	0.000762119	0.0014187	0.000755915
9	240	0.00133014	0.00185628	0.000897479	0.00160093	0.00141327
10	270	0.00141917	0.0018122	0.00135388	0.00164554	0.00148662
11	300	0.00144061	0.00194502	0.00185868	0.00157168	0.00161917
12	330	0.00156173	0.00206137	0.00185628	0.00148133	0.0019078
13	360	0.00157301	0.00192448	0.00191733	0.00165189	0.00212145
14	390	0.00172388	0.00190531	0.00172638	0.00209445	0.0022531
15	690	0.00229913	0.00206999	0.00207932	0.00209297	0.00201404
16	990	0.00261582	0.00178114	0.00217958	0.00223203	0.00156655
17	1290	0.00297994	0.0019758	0.00202571	0.00270572	0.00259161
18	1590	0.0026496	0.00197068	0.00196165	0.00233928	0.00176102
19	1890	0.00258187	0.00295607	0.00229365	0.00196587	0.00171552
20	2190	0.00223211	0.00258982	0.00213574	0.00195754	0.00224953
21	2490	0.00273026	0.00249511	0.00225203	0.00193484	0.00191589
22	2790	0.00362768	0.00287461	0.00236373	0.00200484	0.00215966
23	3090	0.00381692	0.00236112	0.00268045	0.00189824	0.00261917
24	3390	0.00355683	0.00252974	0.0028312	0.00235022	0.00215304
25	3690	0.0038244	0.00303284	0.00290506	0.00256506	0.00204751
26	3990	0.0044271	0.00264076	0.00265375	0.0026549	0.00246946
27	4290	0.00485516	0.00263199	0.00253134	0.00321382	0.00258327
28	4590	0.0041875	0.0027356	0.00275781	0.00300391	0.00174188
		Normalized Data
	Time_(sec)	Roi1_corr_norm	Roi2_corr_norm	Roi3_corr_norm	Roi4_corr_norm	Roi5_corr_norm
1	0	1	1	1	1	1
2	30	1.1074	0.875483	1.04772	0.975399	0.926304
3	60	1.1489	0.96636	1.03355	1.03473	1.07044
4	90	1.14363	1.04346	0.930686	0.975291	0.96919
5	120	1.22161	0.999375	0.893799	0.923891	0.984588
6	150	1.17794	0.984488	1.00982	0.918495	0.828804
7	180	1.10887	0.926034	0.994626	1.00289	0.769191
8	210	0.20348	0.291158	0.232089	0.4155	0.227069
9	240	0.289808	0.455667	0.27331	0.468871	0.424532
10	270	0.309205	0.444846	0.412299	0.481937	0.446565
11	300	0.313876	0.477451	0.566025	0.460304	0.48638
12	330	0.340265	0.506012	0.565293	0.433844	0.573084
13	360	0.342723	0.472409	0.583886	0.483795	0.637263
14	390	0.375594	0.467703	0.525735	0.61341	0.676807
15	690	0.500928	0.508128	0.633217	0.612977	0.604995
16	990	0.569928	0.437222	0.663749	0.653703	0.470575
17	1290	0.649261	0.485007	0.616893	0.792436	0.778493
18	1590	0.577288	0.48375	0.597384	0.685114	0.528991
19	1890	0.562531	0.725636	0.698487	0.575754	0.515323
20	2190	0.486325	0.635732	0.6504	0.573312	0.675736
21	2490	0.594861	0.612483	0.685812	0.566666	0.575514
22	2790	0.790389	0.70564	0.719829	0.587166	0.64874
23	3090	0.83162	0.579592	0.816281	0.555945	0.78677
24	3390	0.774952	0.620984	0.862188	0.68832	0.646751
25	3690	0.833249	0.74448	0.88468	0.751241	0.61505
26	3990	0.964564	0.648237	0.808148	0.777551	0.7418
27	4290	1.05783	0.646084	0.770871	0.941244	0.775987
28	4590	0.912362	0.671517	0.839839	0.879766	0.523243
		Normalize the bouton fluorescent right after bleaching to 0
	Recovery Time_(sec)
1	0	0	0	0	0	0
2	30	0.093198	0.242073	0.0545916	0.095252	0.278733
3	60	0.114139	0.226151	0.238663	0.118572	0.309834
4	90	0.119182	0.274128	0.442251	0.0799625	0.366034
5	120	0.147671	0.316156	0.441282	0.0327386	0.488422
6	150	0.150324	0.266709	0.465905	0.121886	0.579015
7	180	0.185812	0.259784	0.388893	0.353212	0.634834
8	480	0.32112	0.319269	0.531238	0.352439	0.533468
9	780	0.395611	0.214932	0.571673	0.425124	0.343725
10	1080	0.481257	0.285246	0.509618	0.672721	0.77837
11	1380	0.403557	0.283397	0.483781	0.481182	0.426183
12	1680	0.387625	0.639329	0.617679	0.286007	0.406889
13	1980	0.305355	0.507037	0.553994	0.28165	0.633322
14	2280	0.422528	0.472826	0.600892	0.269788	0.491853
15	2580	0.633617	0.609905	0.645943	0.306374	0.595215
16	2880	0.678128	0.424428	0.77368	0.250655	0.790054
17	3180	0.616951	0.485334	0.834477	0.486905	0.592408
18	3480	0.679888	0.667058	0.864265	0.5992	0.547661
19	3780	0.821653	0.525437	0.762909	0.646156	0.726576
20	4080	0.92234	0.52227	0.713541	0.938301	0.774833
21	4380	0.765296	0.559694	0.80488	0.828582	0.418069

## Sheet: WT-0129-C4
		Raw Data
	Time_(sec)	Roi1	Roi2	Roi3	Roi4	Roi5	Ref_fluo	Background
1	0	3798508	4672240	3354583	2713024	4371115	8.65462e+08	43618731
2	30	3.85729e+06	4.52603e+06	3.35739e+06	2.75701e+06	4.09603e+06	8.66656e+08	4.32978e+07			Filter out due to large abrupt change.
3	60	3.68834e+06	4.5322e+06	3.41405e+06	2.87382e+06	4.43845e+06	8.70462e+08	4.40643e+07
4	90	3.83162e+06	4.53695e+06	3.43727e+06	2.7179e+06	4.72747e+06	8.65154e+08	4.29836e+07
5	120	3.60185e+06	4.5434e+06	3.58386e+06	2.75195e+06	4.63735e+06	8.73442e+08	4.31215e+07
6	150	3.68664e+06	4.50847e+06	3.55484e+06	2.82478e+06	4.51729e+06	8.7412e+08	4.33563e+07
7	180	3.54582e+06	4.33778e+06	3.52227e+06	2.84689e+06	4.55623e+06	8.70021e+08	4.28869e+07
8	210	2.09983e+06	2.22028e+06	2.16718e+06	1.7107e+06	2.51567e+06	8.51456e+08	4.25946e+07
9	240	2.49015e+06	2.63224e+06	2.51837e+06	1.92006e+06	3.00125e+06	8.65786e+08	4.2771e+07
10	270	2.45038e+06	2.74144e+06	2.4735e+06	1.95084e+06	3.11771e+06	8.6937e+08	4.299e+07
11	300	2.48861e+06	2.76083e+06	2.5424e+06	2.05553e+06	3.2377e+06	8.67584e+08	4.30686e+07
12	330	2.44788e+06	2.76554e+06	2.54282e+06	2.14901e+06	3.41393e+06	8.70263e+08	4.29453e+07
13	360	2.48531e+06	2.75258e+06	2.6265e+06	2.19641e+06	3.56909e+06	8.70131e+08	4.35268e+07
14	390	2.4715e+06	2.80694e+06	2.54407e+06	2.22583e+06	3.58849e+06	8.64099e+08	4.33736e+07
15	690	2.74067e+06	2.83579e+06	2.90243e+06	2.6885e+06	4.7677e+06	8.71284e+08	4.29998e+07
16	990	2.99316e+06	2.69825e+06	3.00459e+06	2.95444e+06	4.70079e+06	8.70779e+08	4.26652e+07
17	1290	2.91894e+06	2.79461e+06	3.1799e+06	2.93295e+06	4.76678e+06	8.72749e+08	4.29904e+07
18	1590	2.83705e+06	2.5405e+06	3.08917e+06	3.44277e+06	4.0814e+06	8.63957e+08	4.30338e+07
19	1890	3.23963e+06	2.70376e+06	2.97845e+06	3.32474e+06	4.49126e+06	8.57231e+08	4.31911e+07
20	2190	3.01723e+06	2.51235e+06	3.14293e+06	3.15865e+06	4.39031e+06	8.50435e+08	4.24208e+07
21	2490	3.1422e+06	2.64027e+06	3.21516e+06	2.90591e+06	4.74357e+06	8.69277e+08	4.33451e+07
22	2790	3.27466e+06	2.8307e+06	3.07264e+06	2.71118e+06	5.76386e+06	8.67336e+08	4.23479e+07
23	3090	3.12294e+06	2.46585e+06	3.03366e+06	2.70804e+06	4.98691e+06	8.59094e+08	4.24236e+07
24	3390	3.16253e+06	2.67265e+06	3.08339e+06	2.90398e+06	4.33537e+06	8.55328e+08	4.22976e+07
25	3690	2.8718e+06	2.56598e+06	3.1418e+06	2.89374e+06	4.71935e+06	8.5401e+08	4.28506e+07
26	3990	2.83498e+06	2.72393e+06	3.06841e+06	2.88914e+06	4.58196e+06	8.48796e+08	4.31321e+07
27	4290	2.66111e+06	2.71968e+06	3.19315e+06	2.93586e+06	5.19353e+06	8.52455e+08	4.30491e+07
28	4590	2.54196e+06	3.02749e+06	3.35815e+06	2.70023e+06	4.75128e+06	8.51494e+08	4.27916e+07
		Background corrected Data
	Time_(sec)	Roi1-bkgd-corr	Roi2-bkgd-corr	Roi3-bkgd-corr	Roi4-bkgd-corr	Roi5-bkgd-corr	Ref_fluo-bkgd-corr
1	0	2680079	3553811	2236154	1594595	3252686	4.77018e+08
2	30	2.74709e+06	3.41583e+06	2.24719e+06	1.64681e+06	2.98583e+06	4.8107e+08
3	60	2.55849e+06	3.40234e+06	2.2842e+06	1.74397e+06	3.30859e+06	4.78049e+08
4	90	2.72948e+06	3.4348e+06	2.33513e+06	1.61576e+06	3.62532e+06	4.82366e+08
5	120	2.49618e+06	3.43772e+06	2.47818e+06	1.64627e+06	3.53167e+06	4.89426e+08
6	150	2.57494e+06	3.39677e+06	2.44314e+06	1.71308e+06	3.40559e+06	4.88013e+08
7	180	2.44616e+06	3.23812e+06	2.42261e+06	1.74723e+06	3.45657e+06	4.88094e+08
8	210	1.00766e+06	1.12811e+06	1.07501e+06	618527	1.4235e+06	4.72132e+08
9	240	1.39346e+06	1.53555e+06	1.42168e+06	823364	1.90456e+06	4.84891e+08
10	270	1.34808e+06	1.63913e+06	1.37119e+06	848533	2.0154e+06	4.86525e+08
11	300	1.38429e+06	1.6565e+06	1.43808e+06	951209	2.13338e+06	4.84039e+08
12	330	1.34672e+06	1.66438e+06	1.44166e+06	1.04785e+06	2.31277e+06	4.87816e+08
13	360	1.36924e+06	1.6365e+06	1.51043e+06	1.08033e+06	2.45302e+06	4.82505e+08
14	390	1.35936e+06	1.69479e+06	1.43192e+06	1.11368e+06	2.47634e+06	4.77837e+08
15	690	1.63812e+06	1.73323e+06	1.79987e+06	1.58594e+06	3.66515e+06	4.88352e+08
16	990	1.89918e+06	1.60427e+06	1.91061e+06	1.86046e+06	3.60681e+06	4.90827e+08
17	1290	1.81662e+06	1.6923e+06	2.07758e+06	1.83063e+06	3.66446e+06	4.899e+08
18	1590	1.73362e+06	1.43707e+06	1.98574e+06	2.33934e+06	2.97797e+06	4.80721e+08
19	1890	2.13217e+06	1.5963e+06	1.87099e+06	2.21727e+06	3.3838e+06	4.72595e+08
20	2190	1.92951e+06	1.42464e+06	2.05522e+06	2.07094e+06	3.3026e+06	4.72658e+08
21	2490	2.03078e+06	1.52886e+06	2.10375e+06	1.79449e+06	3.63216e+06	4.83269e+08
22	2790	2.18882e+06	1.74486e+06	1.98679e+06	1.62533e+06	4.67802e+06	4.90209e+08
23	3090	2.03515e+06	1.37806e+06	1.94587e+06	1.62025e+06	3.89913e+06	4.81293e+08
24	3390	2.07798e+06	1.5881e+06	1.99884e+06	1.81942e+06	3.25082e+06	4.78649e+08
25	3690	1.77307e+06	1.46725e+06	2.04307e+06	1.79501e+06	3.62062e+06	4.72405e+08
26	3990	1.72903e+06	1.61798e+06	1.96245e+06	1.78319e+06	3.47601e+06	4.64685e+08
27	4290	1.55729e+06	1.61586e+06	2.08932e+06	1.83204e+06	4.0897e+06	4.69084e+08
28	4590	1.44474e+06	1.93027e+06	2.26093e+06	1.60301e+06	3.65406e+06	4.70416e+08
		Bleaching Corrected Data
	Time_(sec)	Roi1-bkgd_bleach-corr	Roi2-bkgd_bleach-corr	Roi3-bkgd_bleach-corr	Roi4-bkgd_bleach-corr	Roi5-bkgd_bleach-corr
1	0	0.00561841	0.00745006	0.00468778	0.00334284	0.0068188
2	30	0.00571036	0.00710048	0.00467124	0.00342322	0.00620664
3	60	0.00535193	0.00711714	0.00477817	0.00364809	0.00692103
4	90	0.00565851	0.00712074	0.00484098	0.00334965	0.0075157
5	120	0.00510021	0.00702398	0.00506344	0.00336368	0.00721594
6	150	0.00527638	0.00696041	0.0050063	0.00351032	0.00697849
7	180	0.00501165	0.00663421	0.0049634	0.00357969	0.00708177
8	210	0.00213428	0.0023894	0.00227692	0.00131007	0.00301505
9	240	0.00287376	0.00316679	0.00293195	0.00169804	0.00392781
10	270	0.00277083	0.00336907	0.00281834	0.00174407	0.00414244
11	300	0.00285988	0.00342225	0.002971	0.00196515	0.00440746
12	330	0.00276071	0.0034119	0.00295534	0.00214804	0.00474107
13	360	0.00283776	0.00339168	0.00313039	0.00223901	0.00508393
14	390	0.00284481	0.00354681	0.00299668	0.00233068	0.00518241
15	690	0.00335438	0.00354915	0.00368561	0.00324753	0.00750513
16	990	0.00386936	0.00326851	0.00389263	0.00379047	0.00734844
17	1290	0.00370815	0.00345437	0.00424083	0.00373675	0.00748003
18	1590	0.00360629	0.0029894	0.00413075	0.0048663	0.00619479
19	1890	0.00451162	0.00337773	0.00395897	0.00469171	0.00716004
20	2190	0.00408226	0.00301409	0.00434821	0.00438147	0.00698729
21	2490	0.00420218	0.00316357	0.00435316	0.00371324	0.0075158
22	2790	0.00446507	0.00355941	0.00405296	0.00331559	0.00954291
23	3090	0.00422851	0.00286325	0.00404301	0.00336645	0.00810136
24	3390	0.00434134	0.00331788	0.004176	0.00380117	0.00679165
25	3690	0.00375328	0.00310591	0.00432482	0.00379972	0.00766422
26	3990	0.00372087	0.00348188	0.00422319	0.00383742	0.00748036
27	4290	0.00331985	0.00344471	0.00445405	0.00390557	0.00871848
28	4590	0.00307119	0.00410333	0.00480624	0.00340765	0.00776773
		Normalized Data
	Time_(sec)	Roi1_corr_norm	Roi2_corr_norm	Roi3_corr_norm	Roi4_corr_norm	Roi5_corr_norm
1	0	1	1	1	1	1
2	30	1.01637	0.953077	0.996471	1.02404	0.910225
3	60	0.95257	0.955312	1.01928	1.09131	1.01499
4	90	1.00714	0.955795	1.03268	1.00204	1.1022
5	120	0.907768	0.942809	1.08014	1.00623	1.05824
6	150	0.939124	0.934275	1.06795	1.0501	1.02342
7	180	0.892004	0.89049	1.05879	1.07085	1.03857
8	210	0.379872	0.320722	0.485714	0.391903	0.442167
9	240	0.51149	0.425069	0.625446	0.507962	0.576027
10	270	0.493169	0.45222	0.601209	0.521733	0.607503
11	300	0.509019	0.459359	0.633776	0.587868	0.646369
12	330	0.491368	0.457969	0.630434	0.64258	0.695294
13	360	0.505084	0.455256	0.667777	0.669792	0.745575
14	390	0.506338	0.476077	0.639254	0.697215	0.760018
15	690	0.597033	0.476392	0.786216	0.971488	1.10065
16	990	0.688693	0.438722	0.830379	1.13391	1.07767
17	1290	0.660001	0.46367	0.904656	1.11784	1.09697
18	1590	0.641871	0.401258	0.881173	1.45574	0.908487
19	1890	0.803007	0.453382	0.844529	1.40351	1.05004
20	2190	0.726586	0.404573	0.927563	1.3107	1.02471
21	2490	0.747931	0.424637	0.928618	1.1108	1.10222
22	2790	0.794722	0.477769	0.864579	0.991848	1.3995
23	3090	0.752618	0.384326	0.862457	1.00706	1.18809
24	3390	0.7727	0.445349	0.890826	1.13711	0.996019
25	3690	0.668033	0.416897	0.922573	1.13667	1.12398
26	3990	0.662265	0.467362	0.900894	1.14795	1.09702
27	4290	0.590889	0.462373	0.95014	1.16834	1.2786
28	4590	0.54663	0.550778	1.02527	1.01939	1.13916
		Normalize the bouton fluorescent right after bleaching to 0
	Recovery Time_(sec)
1	0	0	0	0	0	0
2	30	0.227159	0.16651	0.253708	0.180486	0.231222
3	60	0.195539	0.209835	0.209702	0.2019	0.285592
4	90	0.222893	0.221227	0.268833	0.304749	0.352725
5	120	0.192431	0.21901	0.262765	0.389832	0.437237
6	150	0.216102	0.214679	0.330568	0.432151	0.524088
7	180	0.218267	0.247905	0.278779	0.474796	0.549036
8	480	0.374797	0.248407	0.545614	0.901324	1.13743
9	780	0.532992	0.188296	0.625799	1.1539	1.09774
10	1080	0.483473	0.228107	0.760664	1.12891	1.13107
11	1380	0.452183	0.128513	0.718025	1.65439	0.805492
12	1680	0.730287	0.21169	0.651493	1.57317	1.05001
13	1980	0.598392	0.133803	0.802254	1.42884	1.00625
14	2280	0.635231	0.165821	0.804171	1.11798	1.14013
15	2580	0.715988	0.250605	0.687896	0.932987	1.65364
16	2880	0.64332	0.101495	0.684044	0.956648	1.28846
17	3180	0.677979	0.198871	0.735552	1.15888	0.95669
18	3480	0.497335	0.153469	0.793194	1.15821	1.17773
19	3780	0.48738	0.233998	0.753832	1.17575	1.13115
20	4080	0.364192	0.226036	0.843248	1.20745	1.44479
21	4380	0.287806	0.367108	0.979658	0.975814	1.20395

## Sheet: WT-0130-C1
		Raw Data
	Time_(sec)	Roi1	Roi2	Roi3	Roi4	Roi5	Ref_fluo	Background
1	0	2421430	2200500	2378216	4617847	2853435	980793365	68979905
2	30	2.49428e+06	2.24026e+06	2.34997e+06	4.77913e+06	2.98242e+06	1.03595e+09	6.89268e+07			Filter out due to large abrupt change or bouton moved.
3	60	2.45595e+06	2.27987e+06	2.31414e+06	4.91654e+06	3.02796e+06	1.03728e+09	6.89261e+07
4	90	2.43569e+06	2.25199e+06	2.33407e+06	4.79804e+06	2.98682e+06	1.03652e+09	6.88324e+07
5	120	2.47975e+06	2.2466e+06	2.31137e+06	4.92262e+06	2.98911e+06	1.03287e+09	6.87508e+07
6	150	2.55921e+06	2.23712e+06	2.31925e+06	5.13286e+06	3.05688e+06	1.04982e+09	6.90401e+07
7	180	2.50031e+06	2.28054e+06	2.29106e+06	5.35617e+06	3.01716e+06	1.04452e+09	6.88287e+07
8	210	1.53428e+06	1.46901e+06	1.55201e+06	2.59457e+06	1.76625e+06	1.01844e+09	6.86292e+07
9	240	1.67889e+06	1.55242e+06	1.64132e+06	2.83874e+06	1.9156e+06	1.04343e+09	6.88423e+07
10	270	1.7626e+06	1.58055e+06	1.68071e+06	3.04945e+06	1.9028e+06	1.03668e+09	6.87485e+07
11	300	1.72347e+06	1.5604e+06	1.68119e+06	2.95787e+06	1.9303e+06	1.02415e+09	6.84954e+07
12	330	1.75887e+06	1.58225e+06	1.71227e+06	3.05501e+06	1.95684e+06	1.03274e+09	6.85755e+07
13	360	1.80415e+06	1.59945e+06	1.72985e+06	3.16479e+06	1.97495e+06	1.03914e+09	6.87702e+07
14	390	1.76821e+06	1.58664e+06	1.77112e+06	3.12412e+06	1.98931e+06	1.03051e+09	6.8809e+07
15	690	1.85659e+06	1.71198e+06	1.85389e+06	3.32158e+06	2.03109e+06	1.01896e+09	6.8521e+07
16	990	1.90849e+06	1.73913e+06	1.80673e+06	3.44905e+06	2.17301e+06	1.02009e+09	6.88318e+07
17	1290	1.95717e+06	1.75208e+06	1.87143e+06	3.39438e+06	2.32757e+06	1.01562e+09	6.88229e+07
18	1590	1.94701e+06	1.78264e+06	1.89273e+06	3.52122e+06	2.27219e+06	1.01486e+09	6.89857e+07
19	1890	1.996e+06	1.79334e+06	1.90837e+06	3.87725e+06	2.31703e+06	1.01246e+09	6.91811e+07
20	2190	1.99119e+06	1.79618e+06	1.91252e+06	3.70796e+06	2.36334e+06	1.00785e+09	6.89466e+07
21	2490	1.89305e+06	1.77963e+06	1.93814e+06	3.51738e+06	2.27395e+06	1.0016e+09	6.85365e+07
22	2790	1.81568e+06	1.77562e+06	1.91611e+06	3.71496e+06	2.41127e+06	9.95961e+08	6.85643e+07
23	3090	1.85316e+06	1.81998e+06	1.85404e+06	3.94588e+06	2.33826e+06	9.84732e+08	6.84168e+07
24	3390	1.75632e+06	1.87412e+06	1.86956e+06	4.12012e+06	2.40182e+06	9.83808e+08	6.8436e+07
25	3690	1.65895e+06	1.94824e+06	1.93853e+06	4.05101e+06	2.35178e+06	9.86151e+08	6.82422e+07
26	3990	1.56889e+06	1.89752e+06	1.88435e+06	3.9476e+06	2.38333e+06	9.82171e+08	6.87275e+07
27	4290	1.59496e+06	1.98967e+06	1.87741e+06	3.92938e+06	2.46258e+06	9.76308e+08	6.8321e+07
28	4590	1.76693e+06	1.94897e+06	1.92083e+06	4.25442e+06	2.40495e+06	9.79607e+08	6.80679e+07
		Background corrected Data
	Time_(sec)	Roi1-bkgd-corr	Roi2-bkgd-corr	Roi3-bkgd-corr	Roi4-bkgd-corr	Roi5-bkgd-corr	Ref_fluo-bkgd-corr
1	0	1.11105e+06	890117	1.06783e+06	3.30746e+06	1.54305e+06	5.18052e+08
2	30	1.18491e+06	930889	1.0406e+06	3.46976e+06	1.67305e+06	5.73567e+08
3	60	1.14659e+06	970512	1.00478e+06	3.60718e+06	1.7186e+06	5.74903e+08
4	90	1.12811e+06	944410	1.02649e+06	3.49046e+06	1.67924e+06	5.74763e+08
5	120	1.17372e+06	940572	1.00534e+06	3.61659e+06	1.68308e+06	5.71669e+08
6	150	1.24768e+06	925593	1.00772e+06	3.82134e+06	1.74535e+06	5.86675e+08
7	180	1.1928e+06	973027	983546	4.04866e+06	1.70965e+06	5.82794e+08
8	210	230560	165288	248292	1.29085e+06	462532	5.58049e+08
9	240	371119	244651	333550	1.53097e+06	607828	5.8161e+08
10	270	456614	274566	374722	1.74346e+06	596816	5.75488e+08
11	300	422293	259221	380011	1.65669e+06	629120	5.64658e+08
12	330	456165	279551	409570	1.75231e+06	654141	5.7271e+08
13	360	497751	293048	423452	1.85839e+06	668550	5.7781e+08
14	390	461077	279501	463987	1.81699e+06	682171	5.68916e+08
15	690	554928	410315	552230	2.01991e+06	729421	5.593e+08
16	990	600922	431559	499161	2.14148e+06	865443	5.58344e+08
17	1290	649773	444681	564034	2.08698e+06	1.02017e+06	5.53927e+08
18	1590	636512	472144	582236	2.21073e+06	961694	5.52081e+08
19	1890	681799	479135	594161	2.56304e+06	1.00283e+06	5.48366e+08
20	2190	681436	486428	602771	2.39821e+06	1.05358e+06	5.4533e+08
21	2490	591093	477675	636186	2.21542e+06	971995	5.41834e+08
22	2790	513193	473128	613623	2.41248e+06	1.10878e+06	5.36008e+08
23	3090	553471	520290	554354	2.6462e+06	1.03858e+06	5.25768e+08
24	3390	456273	574067	569509	2.82007e+06	1.10177e+06	5.24715e+08
25	3690	362581	651869	642164	2.75464e+06	1.05541e+06	5.28358e+08
26	3990	263303	591935	578759	2.64202e+06	1.07774e+06	5.21123e+08
27	4290	297094	691803	579544	2.63152e+06	1.16472e+06	5.17987e+08
28	4590	473875	655913	627769	2.96136e+06	1.11189e+06	5.22984e+08
		Bleaching Corrected Data
	Time_(sec)	Roi1-bkgd_bleach-corr	Roi2-bkgd_bleach-corr	Roi3-bkgd_bleach-corr	Roi4-bkgd_bleach-corr	Roi5-bkgd_bleach-corr
1	0	0.00214466	0.0017182	0.00206125	0.00638443	0.00297857
2	30	0.00206586	0.00162298	0.00181426	0.00604944	0.00291692
3	60	0.0019944	0.00168813	0.00174774	0.00627441	0.00298937
4	90	0.00196274	0.00164313	0.00178593	0.00607286	0.00292162
5	120	0.00205315	0.00164531	0.00175861	0.00632638	0.00294416
6	150	0.00212671	0.00157769	0.00171768	0.00651355	0.00297499
7	180	0.00204669	0.00166959	0.00168764	0.00694698	0.00293354
8	210	0.000413154	0.000296188	0.000444929	0.00231314	0.000828837
9	240	0.000638089	0.000420645	0.000573495	0.0026323	0.00104508
10	270	0.000793437	0.0004771	0.000651137	0.00302953	0.00103706
11	300	0.000747875	0.000459076	0.000672994	0.00293398	0.00111416
12	330	0.000796502	0.000488119	0.000715143	0.00305968	0.00114218
13	360	0.000861444	0.00050717	0.000732857	0.00321628	0.00115704
14	390	0.000810448	0.000491287	0.000815563	0.00319377	0.00119907
15	690	0.000992183	0.000733622	0.000987358	0.0036115	0.00130417
16	990	0.00107626	0.000772927	0.000894004	0.00383542	0.00155002
17	1290	0.00117303	0.00080278	0.00101825	0.0037676	0.0018417
18	1590	0.00115293	0.000855207	0.00105462	0.00400436	0.00174194
19	1890	0.00124333	0.000873751	0.00108351	0.00467397	0.00182876
20	2190	0.00124959	0.000891989	0.00110533	0.00439773	0.00193201
21	2490	0.00109091	0.000881591	0.00117413	0.00408874	0.0017939
22	2790	0.000957435	0.000882689	0.0011448	0.00450082	0.00206859
23	3090	0.00105269	0.000989581	0.00105437	0.00503301	0.00197536
24	3390	0.000869564	0.00109406	0.00108537	0.00537448	0.00209975
25	3690	0.00068624	0.00123376	0.0012154	0.00521359	0.00199753
26	3990	0.000505262	0.00113588	0.0011106	0.00506985	0.00206811
27	4290	0.000573555	0.00133556	0.00111884	0.00508028	0.00224855
28	4590	0.000906099	0.00125417	0.00120036	0.00566243	0.00212606
		Normalized Data
	Time_(sec)	Roi1_corr_norm	Roi2_corr_norm	Roi3_corr_norm	Roi4_corr_norm	Roi5_corr_norm
1	0	1	1	1	1	1
2	30	0.963255	0.944582	0.880175	0.947531	0.979304
3	60	0.929936	0.9825	0.847905	0.982768	1.00363
4	90	0.915175	0.956309	0.866432	0.951199	0.980882
5	120	0.957331	0.957576	0.853177	0.990907	0.988448
6	150	0.991627	0.918224	0.833321	1.02022	0.998798
7	180	0.954318	0.971708	0.818747	1.08811	0.984883
8	210	0.192643	0.172383	0.215854	0.36231	0.278267
9	240	0.297524	0.244817	0.278227	0.4123	0.350866
10	270	0.369959	0.277674	0.315894	0.474519	0.348174
11	300	0.348714	0.267184	0.326498	0.459552	0.37406
12	330	0.371388	0.284087	0.346947	0.479241	0.383468
13	360	0.401669	0.295175	0.35554	0.503769	0.388456
14	390	0.37789	0.285931	0.395665	0.500243	0.402566
15	690	0.462629	0.426971	0.47901	0.565672	0.43785
16	990	0.50183	0.449847	0.43372	0.600746	0.520391
17	1290	0.546953	0.467221	0.493995	0.590124	0.618317
18	1590	0.537581	0.497734	0.511642	0.627207	0.584825
19	1890	0.579732	0.508527	0.525659	0.732089	0.613974
20	2190	0.582649	0.519141	0.536245	0.688821	0.648639
21	2490	0.508663	0.513089	0.569623	0.640424	0.602269
22	2790	0.446427	0.513729	0.555393	0.704969	0.694492
23	3090	0.490841	0.57594	0.511521	0.788326	0.66319
24	3390	0.405455	0.636745	0.526559	0.841811	0.704951
25	3690	0.319976	0.718055	0.589641	0.81661	0.670634
26	3990	0.23559	0.661089	0.5388	0.794097	0.694332
27	4290	0.267433	0.777302	0.542797	0.79573	0.75491
28	4590	0.42249	0.729935	0.582347	0.886913	0.713785
		Normalize the bouton fluorescent right after bleaching to 0
	Recovery Time_(sec)
1	0	0	0	0	0	0
2	30	0.136891	0.0917851	0.0951475	0.0787325	0.101882
3	60	0.231434	0.13342	0.152608	0.176725	0.0981037
4	90	0.203705	0.120127	0.168783	0.153152	0.13443
5	120	0.233299	0.141546	0.199976	0.184161	0.147633
6	150	0.272822	0.155596	0.213086	0.222791	0.154633
7	180	0.241786	0.143882	0.274294	0.217239	0.174435
8	480	0.352387	0.322601	0.401434	0.320287	0.223951
9	780	0.403553	0.351588	0.332345	0.375526	0.339784
10	1080	0.462448	0.373603	0.424293	0.358797	0.477208
11	1380	0.450215	0.412268	0.451212	0.417201	0.430208
12	1680	0.505231	0.425944	0.472594	0.582386	0.471113
13	1980	0.509037	0.439394	0.488744	0.51424	0.51976
14	2280	0.412472	0.431725	0.539661	0.438017	0.454687
15	2580	0.33124	0.432536	0.517953	0.539673	0.584109
16	2880	0.38921	0.511367	0.451027	0.670957	0.54018
17	3180	0.277763	0.588415	0.473969	0.755193	0.598786
18	3480	0.166196	0.691448	0.570197	0.715502	0.550627
19	3780	0.0560552	0.619262	0.492641	0.680045	0.583883
20	4080	0.0976172	0.766522	0.498738	0.682617	0.668895
21	4380	0.299997	0.7065	0.55907	0.826226	0.611183

## Sheet: WT-0130-C4
		Raw Data
	Time_(sec)	Roi1	Roi2	Roi3	Roi4	Roi5	Ref_fluo	Background
1	0	5450455	4816949	2644951	1837123	2224085	1020128812	15684151
2	30	5.55033e+06	4.73726e+06	2.72365e+06	1.79359e+06	2.16153e+06	1.02096e+09	1.5665e+07
3	60	5.48516e+06	4.72643e+06	2.6799e+06	1.79147e+06	2.20909e+06	1.01606e+09	1.56077e+07
4	90	5.51872e+06	4.78051e+06	2.7304e+06	1.77781e+06	2.2211e+06	1.02152e+09	1.56533e+07
5	120	5.50469e+06	4.75199e+06	2.7248e+06	1.82913e+06	2.16332e+06	1.0213e+09	1.56763e+07
6	150	5.65193e+06	4.68774e+06	2.6824e+06	1.76101e+06	2.15006e+06	1.01352e+09	1.56075e+07
7	180	5.5339e+06	4.79667e+06	2.70764e+06	1.85178e+06	2.11779e+06	1.02127e+09	1.57208e+07
8	210	2.82808e+06	2.37684e+06	2.18044e+06	1.30536e+06	1.43958e+06	9.95196e+08	1.56493e+07
9	240	3.28473e+06	2.75342e+06	2.38224e+06	1.40434e+06	1.59288e+06	1.01815e+09	1.56089e+07
10	270	3.27372e+06	2.82246e+06	2.41533e+06	1.50413e+06	1.59768e+06	1.0177e+09	1.5612e+07
11	300	3.22643e+06	2.75926e+06	2.39268e+06	1.48788e+06	1.63189e+06	1.01784e+09	1.55239e+07
12	330	3.24488e+06	2.75447e+06	2.35262e+06	1.60757e+06	1.72398e+06	1.01825e+09	1.56675e+07
13	360	3.25561e+06	2.72162e+06	2.38507e+06	1.46243e+06	1.72574e+06	1.01497e+09	1.56371e+07
14	390	3.27186e+06	2.66551e+06	2.38693e+06	1.47777e+06	1.69979e+06	1.01786e+09	1.56317e+07
15	690	3.51596e+06	2.82605e+06	2.37979e+06	1.47195e+06	1.77934e+06	1.01666e+09	1.55336e+07
16	990	3.89875e+06	2.91581e+06	2.3636e+06	1.48784e+06	1.92359e+06	1.00876e+09	1.5598e+07
17	1290	3.86319e+06	3.13956e+06	2.4009e+06	1.47847e+06	2.01093e+06	1.01902e+09	1.56353e+07
18	1590	3.91854e+06	3.07366e+06	2.38892e+06	1.45141e+06	2.19557e+06	1.01722e+09	1.56334e+07
19	1890	4.11707e+06	3.04298e+06	2.34163e+06	1.50613e+06	2.07763e+06	1.01007e+09	1.55836e+07
20	2190	3.87468e+06	3.1826e+06	2.4052e+06	1.64716e+06	1.96329e+06	1.0121e+09	1.56384e+07
21	2490	4.25012e+06	3.38918e+06	2.37333e+06	1.53893e+06	1876061	1.01214e+09	1.56536e+07
22	2790	4.34797e+06	3.42091e+06	2.37312e+06	1.47441e+06	1.8919e+06	1.00943e+09	1.5562e+07
23	3090	4.36928e+06	3.25737e+06	2.38598e+06	1.53841e+06	1.88476e+06	1.01518e+09	1.56357e+07
24	3390	4.36099e+06	3.28836e+06	2.37382e+06	1.43265e+06	1.9343e+06	1.02112e+09	1.5568e+07
25	3690	4.55352e+06	3.50668e+06	2.37121e+06	1.43344e+06	1.94569e+06	1.02338e+09	1.56022e+07
26	3990	4.45812e+06	3.52258e+06	2.38114e+06	1.56265e+06	1.97451e+06	1.0127e+09	1.55345e+07
27	4290	4.49628e+06	3.51356e+06	2.39106e+06	1.41576e+06	1.96508e+06	1.01329e+09	1.57033e+07
28	4590	4.62014e+06	3.64966e+06	2.3254e+06	1.5142e+06	2.09887e+06	1.01059e+09	1.56262e+07
		Background corrected Data
	Time_(sec)	Roi1-bkgd-corr	Roi2-bkgd-corr	Roi3-bkgd-corr	Roi4-bkgd-corr	Roi5-bkgd-corr	Ref_fluo-bkgd-corr
1	0	4.4552e+06	3.82169e+06	1.6497e+06	841868	1.22883e+06	6.02584e+08
2	30	4.55629e+06	3.74322e+06	1.72961e+06	799545	1.16749e+06	6.0392e+08
3	60	4.49476e+06	3.73603e+06	1.6895e+06	801067	1.21869e+06	6.00548e+08
4	90	4.52542e+06	3.78721e+06	1.7371e+06	784513	1.2278e+06	6.04795e+08
5	120	4.50994e+06	3.75723e+06	1.73004e+06	834369	1.16856e+06	6.03965e+08
6	150	4.66154e+06	3.69734e+06	1.69201e+06	770620	1.15967e+06	5.98011e+08
7	180	4.53632e+06	3.79909e+06	1.71006e+06	854205	1.12021e+06	6.0275e+08
8	210	1.83504e+06	1.3838e+06	1.1874e+06	312320	446534	5.78579e+08
9	240	2.29424e+06	1.76294e+06	1.39176e+06	413855	602399	6.02611e+08
10	270	2.28304e+06	1.83178e+06	1.42465e+06	513450	606996	6.02078e+08
11	300	2.24134e+06	1.77418e+06	1.40759e+06	502797	646805	6.04559e+08
12	330	2.25068e+06	1.76027e+06	1.35842e+06	613371	729784	6.01152e+08
13	360	2.26334e+06	1.72935e+06	1.3928e+06	470159	733473	5.98676e+08
14	390	2.27994e+06	1.67359e+06	1.39501e+06	485851	707868	6.01708e+08
15	690	2.53026e+06	1.84035e+06	1.39409e+06	486242	793633	6.03122e+08
16	990	2.90897e+06	1.92602e+06	1.37382e+06	498053	933808	5.93505e+08
17	1290	2.87104e+06	2.1474e+06	1.40875e+06	486316	1.01878e+06	6.02781e+08
18	1590	2.92651e+06	2.08163e+06	1.39688e+06	459371	1.20353e+06	6.01023e+08
19	1890	3.1282e+06	2.05411e+06	1.35276e+06	517259	1.08876e+06	5.95201e+08
20	2190	2.88233e+06	2.19025e+06	1.41285e+06	654808	970945	5.95771e+08
21	2490	3.2568e+06	2.39587e+06	1.38002e+06	545616	882747	5.95411e+08
22	2790	3.36047e+06	2.4334e+06	1.38561e+06	486905	904395	5.95139e+08
23	3090	3.3771e+06	2.26518e+06	1.3938e+06	546225	892584	5.98924e+08
24	3390	3.37311e+06	2.30048e+06	1.38594e+06	444762	946414	6.06665e+08
25	3690	3.56347e+06	2.51663e+06	1.38116e+06	443387	955638	6.0802e+08
26	3990	3.47236e+06	2.53682e+06	1.39538e+06	576889	988744	5.99134e+08
27	4290	3.49981e+06	2.51709e+06	1.39459e+06	419292	968608	5.95236e+08
28	4590	3.62856e+06	2.65809e+06	1.33383e+06	522617	1.10729e+06	5.9459e+08
		Bleaching Corrected Data
	Time_(sec)	Roi1-bkgd_bleach-corr	Roi2-bkgd_bleach-corr	Roi3-bkgd_bleach-corr	Roi4-bkgd_bleach-corr	Roi5-bkgd_bleach-corr
1	0	0.00739349	0.00634218	0.0027377	0.0013971	0.00203927
2	30	0.00754452	0.00619821	0.00286397	0.00132393	0.00193318
3	60	0.00748444	0.00622103	0.00281326	0.00133389	0.0020293
4	90	0.00748257	0.00626198	0.00287222	0.00129716	0.00203011
5	120	0.00746721	0.00622094	0.00286446	0.00138149	0.00193481
6	150	0.00779507	0.00618274	0.0028294	0.00128864	0.00193921
7	180	0.00752604	0.00630293	0.00283709	0.00141718	0.0018585
8	210	0.00317163	0.00239171	0.00205226	0.000539804	0.000771777
9	240	0.00380717	0.00292549	0.00230954	0.000686769	0.000999647
10	270	0.00379193	0.00304243	0.00236623	0.000852797	0.00100817
11	300	0.0037074	0.00293466	0.0023283	0.000831675	0.00106988
12	330	0.00374395	0.00292816	0.00225969	0.00102033	0.00121398
13	360	0.00378058	0.00288862	0.00232646	0.000785332	0.00122516
14	390	0.00378911	0.0027814	0.00231841	0.000807454	0.00117643
15	690	0.00419527	0.00305137	0.00231145	0.000806208	0.00131588
16	990	0.00490133	0.00324517	0.00231475	0.000839173	0.00157338
17	1290	0.00476299	0.00356249	0.00233709	0.000806788	0.00169013
18	1590	0.0048692	0.00346347	0.00232418	0.000764314	0.00200247
19	1890	0.00525571	0.00345112	0.00227278	0.00086905	0.00182923
20	2190	0.00483798	0.00367633	0.00237146	0.00109909	0.00162973
21	2490	0.00546984	0.00402389	0.00231776	0.000916368	0.00148258
22	2790	0.00564653	0.0040888	0.00232822	0.000818137	0.00151964
23	3090	0.0056386	0.00378209	0.00232717	0.00091201	0.00149031
24	3390	0.00556009	0.00379201	0.00228452	0.000733127	0.00156003
25	3690	0.00586077	0.00413905	0.00227157	0.000729231	0.00157172
26	3990	0.00579563	0.00423414	0.002329	0.000962872	0.00165029
27	4290	0.0058797	0.00422873	0.00234291	0.000704413	0.00162726
28	4590	0.00610263	0.00447046	0.00224327	0.000878954	0.00186228
		Normalized Data
	Time_(sec)	Roi1_corr_norm	Roi2_corr_norm	Roi3_corr_norm	Roi4_corr_norm	Roi5_corr_norm
1	0	1	1	1	1	1
2	30	1.02043	0.9773	1.04612	0.947627	0.947979
3	60	1.0123	0.980898	1.0276	0.954761	0.995111
4	90	1.01205	0.987355	1.04913	0.928466	0.99551
5	120	1.00997	0.980884	1.0463	0.988826	0.948778
6	150	1.05431	0.97486	1.03349	0.922368	0.950936
7	180	1.01793	0.993811	1.0363	1.01437	0.911355
8	210	0.428976	0.377112	0.749628	0.386376	0.378458
9	240	0.514935	0.461276	0.843606	0.491568	0.490199
10	270	0.512874	0.479714	0.864311	0.610406	0.494378
11	300	0.50144	0.462721	0.850457	0.595288	0.524639
12	330	0.506385	0.461696	0.825396	0.730319	0.5953
13	360	0.511339	0.455462	0.849787	0.562117	0.600783
14	390	0.512492	0.438556	0.846846	0.577951	0.576889
15	690	0.567427	0.481123	0.844302	0.577059	0.645268
16	990	0.662925	0.51168	0.845509	0.600655	0.771541
17	1290	0.644214	0.561714	0.853666	0.577475	0.82879
18	1590	0.65858	0.546102	0.848952	0.547073	0.981954
19	1890	0.710856	0.544153	0.830178	0.62204	0.897002
20	2190	0.654357	0.579664	0.866224	0.786697	0.799173
21	2490	0.739818	0.634465	0.846607	0.655908	0.727017
22	2790	0.763716	0.6447	0.850428	0.585598	0.745188
23	3090	0.762644	0.596339	0.850046	0.652789	0.730807
24	3390	0.752024	0.597904	0.834464	0.52475	0.764994
25	3690	0.792693	0.652623	0.829735	0.521962	0.770728
26	3990	0.783882	0.667616	0.850712	0.689195	0.809256
27	4290	0.795253	0.666762	0.855795	0.504197	0.797965
28	4590	0.825405	0.704877	0.819399	0.629129	0.913207
		Normalize the bouton fluorescent right after bleaching to 0
	Recovery Time_(sec)
1	0	0	0	0	0	0
2	30	0.1459	0.138449	0.330317	0.181734	0.190756
3	60	0.142402	0.168779	0.403093	0.387042	0.19789
4	90	0.122994	0.140827	0.354398	0.360924	0.249549
5	120	0.131387	0.139141	0.266312	0.594208	0.370176
6	150	0.139796	0.128885	0.352043	0.303616	0.379537
7	180	0.141753	0.101075	0.341704	0.330971	0.338747
8	480	0.234995	0.171097	0.332765	0.329431	0.455479
9	780	0.397086	0.221365	0.337006	0.370195	0.671041
10	1080	0.365327	0.30367	0.365677	0.330148	0.768774
11	1380	0.38971	0.277987	0.349106	0.277626	1.03024
12	1680	0.47844	0.274783	0.283121	0.40714	0.885219
13	1980	0.382542	0.333198	0.409815	0.691608	0.718212
14	2280	0.527597	0.423345	0.340865	0.465653	0.595033
15	2580	0.568159	0.440182	0.354294	0.344182	0.626054
16	2880	0.56634	0.360628	0.352953	0.460264	0.601503
17	3180	0.548315	0.363202	0.298186	0.23906	0.659866
18	3480	0.617343	0.453215	0.281561	0.234243	0.669654
19	3780	0.602388	0.477878	0.355293	0.523159	0.735426
20	4080	0.621688	0.476474	0.37316	0.203552	0.716151
21	4380	0.672866	0.539173	0.245232	0.419388	0.912884

## Sheet: sVGLUT1-1109-C4
		Raw Data
	Time_(sec)	Roi1	Roi2	Roi3	Roi4	Roi5	Ref_fluo	Background
1	0	1860914	2392663	1858529	1518113	1630424	1241402554	27195361
2	30	1.83513e+06	2.36819e+06	1.82244e+06	1.53002e+06	1.63742e+06	1.24984e+09	2.71479e+07			Filter out due to large abrupt change.
3	60	1.7838e+06	2.37843e+06	1.78849e+06	1.47439e+06	1.59562e+06	1.24568e+09	2.71433e+07
4	90	1.78657e+06	2.3639e+06	1.8056e+06	1.50375e+06	1.65838e+06	1.21917e+09	2.7139e+07
5	120	1.82558e+06	2.34731e+06	1.76518e+06	1.50227e+06	1.59693e+06	1.21485e+09	2.70816e+07
6	150	1.80022e+06	2.32319e+06	1.80056e+06	1.51133e+06	1.65244e+06	1.22276e+09	2.7061e+07
7	180	1.78506e+06	2.33771e+06	1.88007e+06	1.47583e+06	1.61875e+06	1.21328e+09	2.71388e+07
8	210	1.23797e+06	1.26886e+06	1.30515e+06	1.27192e+06	1.16029e+06	1.18228e+09	2.70815e+07
9	240	1.33803e+06	1.44173e+06	1.40165e+06	1.36482e+06	1.23695e+06	1.21908e+09	2.70946e+07
10	270	1.34415e+06	1.42755e+06	1.62898e+06	1.36457e+06	1.27831e+06	1.21745e+09	2.70666e+07
11	300	1.34086e+06	1.45383e+06	1.57113e+06	1.34348e+06	1.27664e+06	1.21163e+09	2.70945e+07
12	330	1.3878e+06	1.43412e+06	1.70587e+06	1.36951e+06	1.29422e+06	1.21041e+09	2.70324e+07
13	360	1.39781e+06	1.47384e+06	1.72523e+06	1.35304e+06	1.28934e+06	1.21752e+09	2.70654e+07
14	390	1.51383e+06	1.50174e+06	1.68415e+06	1.34958e+06	1.31771e+06	1.21397e+09	2.70785e+07
15	690	1.36617e+06	1.58486e+06	1.4463e+06	1.33306e+06	1.22965e+06	1.22035e+09	2.71578e+07
16	990	1.4402e+06	1.59178e+06	1.57198e+06	1.39499e+06	1.30271e+06	1.20809e+09	2.70901e+07
17	1290	1.49521e+06	1.56489e+06	1.43196e+06	1.43304e+06	1.25625e+06	1.19489e+09	2.71273e+07
18	1590	1.51579e+06	1.55662e+06	1.53989e+06	1.40243e+06	1.25974e+06	1.20403e+09	2.70596e+07
19	1890	1.45819e+06	1.54996e+06	1.55121e+06	1.45315e+06	1.23427e+06	1.2085e+09	2.70348e+07
20	2190	1.40666e+06	1.59648e+06	1.46701e+06	1.44053e+06	1.24775e+06	1.19862e+09	2.7075e+07
21	2490	1.46035e+06	1.58842e+06	1.52407e+06	1.41675e+06	1.21387e+06	1.18081e+09	2.70266e+07
22	2790	1.45928e+06	1.65515e+06	1.37567e+06	1.42599e+06	1.2314e+06	1.20364e+09	2.70548e+07
23	3090	1.44671e+06	1.60382e+06	1.56858e+06	1.40091e+06	1.20511e+06	1.18321e+09	2.69824e+07
24	3390	1.47602e+06	1.61672e+06	1.59338e+06	1.413e+06	1.21638e+06	1.16349e+09	2.70047e+07
25	3690	1.63759e+06	1.7105e+06	1.52087e+06	1.39999e+06	1.23883e+06	1.21336e+09	2.69718e+07
26	3990	1.53845e+06	1.69477e+06	1.64953e+06	1.36346e+06	1.21669e+06	1.21755e+09	2.69915e+07
27	4290	1.42665e+06	1.73309e+06	1.56981e+06	1.39391e+06	1.23216e+06	1.19795e+09	2.70521e+07
28	4590	1.49471e+06	1.64118e+06	1.65663e+06	1.42354e+06	1.20279e+06	1.20734e+09	2.70209e+07
		Background corrected Data
	Time_(sec)	Roi1-bkgd-corr	Roi2-bkgd-corr	Roi3-bkgd-corr	Roi4-bkgd-corr	Roi5-bkgd-corr	Ref_fluo-bkgd-corr
1	0	1.2062e+06	1.73794e+06	1.20381e+06	863395	975706	8.40158e+08
2	30	1.18155e+06	1.71461e+06	1.16887e+06	876440	983841	8.49299e+08
3	60	1.13033e+06	1.72496e+06	1.13503e+06	820931	942158	8.45209e+08
4	90	1.13321e+06	1.71053e+06	1.15224e+06	850388	1.00502e+06	8.18754e+08
5	120	1.1736e+06	1.69533e+06	1.1132e+06	850294	944956	8.15281e+08
6	150	1.14874e+06	1.67171e+06	1.14908e+06	859846	1.00096e+06	8.235e+08
7	180	1.1317e+06	1.68435e+06	1.22671e+06	822469	965394	8.12867e+08
8	210	585989	616880	653176	619945	508314	7.82711e+08
9	240	685733	789440	749359	712528	584657	8.19317e+08
10	270	692536	775929	977365	712950	626695	8.1811e+08
11	300	688566	801540	918836	691186	624346	8.11877e+08
12	330	737011	783323	1.05508e+06	718718	643422	8.11571e+08
13	360	746218	822253	1.07364e+06	701451	637754	8.18191e+08
14	390	861922	849836	1.03225e+06	697679	665810	8.14448e+08
15	690	712360	931050	792486	679246	575837	8.19658e+08
16	990	788014	939597	919794	742804	650521	8.08396e+08
17	1290	842134	911812	778883	779955	603172	7.9465e+08
18	1590	864339	905174	888441	750977	608293	8.04794e+08
19	1890	807333	899107	900358	802299	583412	8.0963e+08
20	2190	754839	944657	815186	788712	595927	7.99154e+08
21	2490	809696	937768	873417	766097	563213	7.82058e+08
22	2790	807941	1.00382e+06	724333	774658	580061	8.04465e+08
23	3090	797114	954232	918984	751315	555514	7.85107e+08
24	3390	825890	966593	943250	762870	566254	7.6506e+08
25	3690	988252	1.06117e+06	871535	750652	589497	8.15413e+08
26	3990	888635	1.04496e+06	999722	713644	566881	8.19316e+08
27	4290	775381	1.08182e+06	918539	742636	580890	7.98821e+08
28	4590	844189	990667	1.00611e+06	773021	552270	8.08673e+08
		Bleaching Corrected Data
	Time_(sec)	Roi1-bkgd_bleach-corr	Roi2-bkgd_bleach-corr	Roi3-bkgd_bleach-corr	Roi4-bkgd_bleach-corr	Roi5-bkgd_bleach-corr
1	0	0.00143568	0.00206859	0.00143284	0.00102766	0.00116134
2	30	0.00139121	0.00201886	0.00137627	0.00103196	0.00115842
3	60	0.00133734	0.00204087	0.0013429	0.000971276	0.0011147
4	90	0.00138407	0.00208919	0.00140731	0.00103864	0.0012275
5	120	0.0014395	0.00207945	0.00136542	0.00104295	0.00115905
6	150	0.00139494	0.00203001	0.00139536	0.00104414	0.00121549
7	180	0.00139224	0.00207211	0.00150911	0.00101181	0.00118764
8	210	0.000748666	0.000788133	0.000834504	0.000792048	0.000649427
9	240	0.000836957	0.000963533	0.000914614	0.00086966	0.000713591
10	270	0.000846507	0.00094844	0.00119466	0.000871459	0.000766028
11	300	0.000848116	0.000987269	0.00113174	0.000851344	0.000769015
12	330	0.000908128	0.000965193	0.00130004	0.000885588	0.000792811
13	360	0.000912034	0.00100497	0.00131221	0.00085732	0.000779468
14	390	0.00105829	0.00104345	0.00126742	0.000856628	0.000817499
15	690	0.000869094	0.0011359	0.00096685	0.000828694	0.000702534
16	990	0.000974787	0.0011623	0.0011378	0.000918862	0.000804707
17	1290	0.00105975	0.00114744	0.000980158	0.000981508	0.000759041
18	1590	0.00107399	0.00112473	0.00110394	0.00093313	0.000755837
19	1890	0.000997163	0.00111052	0.00111206	0.000990946	0.000720592
20	2190	0.000944547	0.00118207	0.00102006	0.000986933	0.000745697
21	2490	0.00103534	0.0011991	0.00111682	0.000979591	0.000720168
22	2790	0.00100432	0.00124781	0.00090039	0.000962948	0.000721052
23	3090	0.00101529	0.00121542	0.00117052	0.000956959	0.000707565
24	3390	0.00107951	0.00126342	0.00123291	0.000997137	0.000740143
25	3690	0.00121196	0.00130138	0.00106883	0.000920578	0.000722943
26	3990	0.0010846	0.00127541	0.00122019	0.000871024	0.000691895
27	4290	0.000970657	0.00135426	0.00114987	0.000929665	0.000727184
28	4590	0.00104392	0.00122505	0.00124415	0.000955913	0.000682934
		Normalized Data
	Time_(sec)	Roi1_corr_norm	Roi2_corr_norm	Roi3_corr_norm	Roi4_corr_norm	Roi5_corr_norm
1	0	1	1	1	1	1
2	30	0.969027	0.975957	0.960523	1.00418	0.997485
3	60	0.931505	0.986599	0.93723	0.945136	0.959847
4	90	0.964051	1.00996	0.982181	1.01068	1.05698
5	120	1.00267	1.00525	0.952951	1.01488	0.998037
6	150	0.971628	0.981348	0.973845	1.01604	1.04663
7	180	0.969742	1.0017	1.05323	0.984581	1.02265
8	210	0.521473	0.381	0.582414	0.770732	0.559207
9	240	0.58297	0.465792	0.638324	0.846255	0.614457
10	270	0.589622	0.458496	0.833773	0.848006	0.65961
11	300	0.590743	0.477266	0.789861	0.828432	0.662182
12	330	0.632544	0.466594	0.90732	0.861754	0.682672
13	360	0.635264	0.485821	0.915809	0.834247	0.671183
14	390	0.737136	0.504425	0.884551	0.833574	0.70393
15	690	0.605355	0.549118	0.67478	0.806392	0.604936
16	990	0.678974	0.561879	0.79409	0.894133	0.692915
17	1290	0.738158	0.554696	0.684068	0.955093	0.653594
18	1590	0.748071	0.543717	0.770454	0.908017	0.650834
19	1890	0.69456	0.536846	0.776125	0.964277	0.620485
20	2190	0.657911	0.571438	0.711917	0.960372	0.642103
21	2490	0.721151	0.579671	0.779445	0.953227	0.620121
22	2790	0.699545	0.603216	0.628397	0.937032	0.620882
23	3090	0.707188	0.587557	0.816924	0.931204	0.609268
24	3390	0.751918	0.610764	0.860467	0.970301	0.637321
25	3690	0.844177	0.629116	0.745951	0.895803	0.62251
26	3990	0.755466	0.616557	0.85159	0.847582	0.595775
27	4290	0.676097	0.65468	0.802511	0.904645	0.626162
28	4590	0.727127	0.592216	0.868315	0.930187	0.588059
		Normalize the bouton fluorescent right after bleaching to 0
	Recovery Time_(sec)
1	0	0	0	0	0	0
2	30	0.136302	0.138233	0.140626	0.334517	0.122111
3	60	0.151045	0.126338	0.632222	0.342272	0.221906
4	90	0.153529	0.156939	0.521774	0.255573	0.227591
5	120	0.246174	0.139541	0.817207	0.403167	0.272877
6	150	0.252204	0.170885	0.838561	0.281328	0.247484
7	180	0.477991	0.201215	0.759939	0.278347	0.319861
8	480	0.185915	0.274075	0.23232	0.157949	0.101068
9	780	0.349082	0.294879	0.53241	0.546582	0.295516
10	1080	0.480255	0.283169	0.255682	0.816597	0.20861
11	1380	0.502227	0.26527	0.472962	0.608079	0.202511
12	1680	0.383625	0.25407	0.487225	0.857274	0.135435
13	1980	0.302398	0.310462	0.325729	0.839979	0.183213
14	2280	0.442563	0.323884	0.495575	0.808332	0.134629
15	2580	0.394676	0.362269	0.115657	0.736599	0.136311
16	2880	0.411614	0.336741	0.589843	0.710784	0.110643
17	3180	0.510752	0.374574	0.699362	0.883959	0.172644
18	3480	0.715234	0.404493	0.41133	0.553982	0.13991
19	3780	0.518617	0.384018	0.677035	0.340396	0.0808206
20	4080	0.342705	0.446168	0.553591	0.593146	0.147981
21	4380	0.455807	0.344336	0.719101	0.706278	0.063767

## Sheet: sVGLUT1-1110-C1
		Raw Data
	Time_(sec)	Roi1	Roi2	Roi3	Roi4	Roi5	Ref_fluo	Background
1	0	2292274	3857747	3052270	1835285	2452703	1423325536	23998329
2	30	2.21149e+06	3.81459e+06	3.07348e+06	1.8245e+06	2.38729e+06	1.42362e+09	2.40556e+07
3	60	2.21336e+06	3.84206e+06	3.0696e+06	1.8185e+06	2.32641e+06	1.4174e+09	2.39116e+07
4	90	2.21889e+06	3.81782e+06	3.05028e+06	1.85141e+06	2.30393e+06	1.40527e+09	2.38708e+07
5	120	2.22917e+06	3.83078e+06	3.10302e+06	1.79703e+06	2.42753e+06	1.42125e+09	2.40217e+07
6	150	2.29164e+06	3.76171e+06	3.11207e+06	1.84557e+06	2.25069e+06	1.4075e+09	2.39583e+07
7	180	2.19574e+06	3.72934e+06	3.03348e+06	1.844e+06	2.33047e+06	1.40728e+09	2.39235e+07
8	210	1.78324e+06	2.34856e+06	2.05351e+06	1.37177e+06	1.58768e+06	1.37678e+09	2.38462e+07
9	240	1.89428e+06	2.64287e+06	2.24362e+06	1.4219e+06	1.78598e+06	1.4201e+09	2.39342e+07
10	270	1.86497e+06	2.81443e+06	2.22706e+06	1.45008e+06	1.75816e+06	1.42511e+09	2.39281e+07
11	300	1.97846e+06	2.81847e+06	2.18709e+06	1.44103e+06	1.83627e+06	1.41082e+09	2.39444e+07
12	330	2.0327e+06	2.98569e+06	2.19872e+06	1.45779e+06	1.82749e+06	1.41332e+09	2.40875e+07
13	360	2.04901e+06	2.99301e+06	2.23594e+06	1.46211e+06	1.83516e+06	1.40892e+09	2.39613e+07
14	390	1.96634e+06	3.05678e+06	2.2616e+06	1.45179e+06	1.85872e+06	1.42127e+09	2.40334e+07
15	690	1.96081e+06	3.05027e+06	2.33642e+06	1.46919e+06	1.86854e+06	1.39403e+09	2.38917e+07
16	990	2.00663e+06	2.87601e+06	2.45361e+06	1.43614e+06	1.94231e+06	1.40077e+09	2.38534e+07
17	1290	1.8979e+06	2.82734e+06	2.49453e+06	1.43048e+06	2.02687e+06	1.39654e+09	2.37419e+07
18	1590	2.14711e+06	2.78439e+06	2.57796e+06	1.49095e+06	1.99502e+06	1.39066e+09	2.37757e+07
19	1890	2.24224e+06	2.73583e+06	2.55212e+06	1.47117e+06	2.02853e+06	1.39987e+09	2.38691e+07
20	2190	2.0846e+06	2.78918e+06	2.51436e+06	1.39373e+06	2.16205e+06	1.38654e+09	2.37325e+07
21	2490	2.05124e+06	2.66753e+06	2.44218e+06	1.26042e+06	2.19322e+06	1.37999e+09	2.37724e+07
22	2790	2.06851e+06	2.7698e+06	2.29701e+06	1.23357e+06	2.22576e+06	1.36817e+09	2.38793e+07
23	3090	2.02296e+06	2.77012e+06	2.49602e+06	1.35735e+06	2.08441e+06	1.39862e+09	2.38111e+07
24	3390	1.99983e+06	2.75402e+06	2.46245e+06	1.54661e+06	2.25248e+06	1.37139e+09	2.38633e+07
25	3690	2.05268e+06	2.59569e+06	2.48761e+06	1.50659e+06	2.12144e+06	1.38531e+09	2.39559e+07
26	3990	1.90848e+06	2.86774e+06	2.5941e+06	1.58258e+06	1.99789e+06	1.37683e+09	2.38599e+07
27	4290	1.87642e+06	2.5411e+06	2.51075e+06	1.57921e+06	2.16123e+06	1.38113e+09	2.38548e+07
28	4590	1.97933e+06	2.40741e+06	2.51177e+06	1.64154e+06	2.21655e+06	1.38932e+09	2.3908e+07
		Background corrected Data
	Time_(sec)	Roi1-bkgd-corr	Roi2-bkgd-corr	Roi3-bkgd-corr	Roi4-bkgd-corr	Roi5-bkgd-corr	Ref_fluo-bkgd-corr
1	0	1.26756e+06	2.83304e+06	2.02756e+06	810576	1.42799e+06	1.03579e+09
2	30	1.18433e+06	2.78744e+06	2.04633e+06	797345	1.36013e+06	1.03516e+09
3	60	1.19235e+06	2.82105e+06	2.04859e+06	797489	1.3054e+06	1.03127e+09
4	90	1.19962e+06	2.79856e+06	2.03102e+06	832143	1.28467e+06	1.0198e+09
5	120	1.20347e+06	2.80508e+06	2.07731e+06	771321	1.40182e+06	1.03334e+09
6	150	1.26864e+06	2.73871e+06	2.08907e+06	822570	1.22769e+06	1.02062e+09
7	180	1.17423e+06	2.70783e+06	2.01196e+06	822488	1.30896e+06	1.02096e+09
8	210	765028	1.33034e+06	1.03529e+06	353557	569464	9.91706e+08
9	240	872307	1.6209e+06	1.22165e+06	399924	764005	1.0336e+09
10	270	843257	1.79272e+06	1.20535e+06	428368	736454	1.03872e+09
11	300	956052	1.79607e+06	1.16468e+06	418625	813858	1.02416e+09
12	330	1.00418e+06	1.95717e+06	1.17021e+06	429274	798974	1.02435e+09
13	360	1.02588e+06	1.96989e+06	1.21281e+06	438980	812034	1.02198e+09
14	390	940133	2.03057e+06	1.23539e+06	425582	832513	1.03317e+09
15	690	940653	2.03012e+06	1.31626e+06	449029	848384	1.00822e+09
16	990	988108	1.85748e+06	1.43509e+06	417616	923791	1.01558e+09
17	1290	884133	1.81357e+06	1.48077e+06	416720	1.01311e+06	1.01315e+09
18	1590	1.1319e+06	1.76918e+06	1.56275e+06	475749	979815	1.00672e+09
19	1890	1.22305e+06	1.71664e+06	1.53293e+06	451975	1.00934e+06	1.01443e+09
20	2190	1.07124e+06	1.77582e+06	1.501e+06	380370	1.14869e+06	1.0033e+09
21	2490	1.03618e+06	1.65246e+06	1.42711e+06	245355	1.17816e+06	9.96105e+08
22	2790	1.04889e+06	1.75017e+06	1.27738e+06	213944	1.20613e+06	9.82557e+08
23	3090	1.00625e+06	1.75341e+06	1.47931e+06	340638	1.0677e+06	1.01411e+09
24	3390	980882	1.73507e+06	1.4435e+06	527663	1.23354e+06	9.86036e+08
25	3690	1.02978e+06	1.57279e+06	1.46471e+06	483695	1.09854e+06	9.9846e+08
26	3990	889677	1.84894e+06	1.5753e+06	563783	979086	9.91535e+08
27	4290	857839	1.52251e+06	1.49217e+06	560629	1.14265e+06	9.95917e+08
28	4590	958475	1.38656e+06	1.49092e+06	620686	1.1957e+06	1.00325e+09
		Bleaching Corrected Data
	Time_(sec)	Roi1-bkgd_bleach-corr	Roi2-bkgd_bleach-corr	Roi3-bkgd_bleach-corr	Roi4-bkgd_bleach-corr	Roi5-bkgd_bleach-corr
1	0	0.00122376	0.00273514	0.0019575	0.000782565	0.00137865
2	30	0.0011441	0.00269275	0.00197682	0.000770261	0.00131393
3	60	0.0011562	0.00273552	0.00198648	0.00077331	0.00126582
4	90	0.00117634	0.00274423	0.0019916	0.00081599	0.00125973
5	120	0.00116464	0.00271458	0.0020103	0.000746438	0.0013566
6	150	0.00124301	0.00268338	0.00204686	0.000805953	0.00120289
7	180	0.00115012	0.00265224	0.00197066	0.000805602	0.00128208
8	210	0.000771426	0.00134147	0.00104395	0.000356514	0.000574227
9	240	0.000843948	0.0015682	0.00118194	0.000386922	0.000739167
10	270	0.000811827	0.0017259	0.00116043	0.000412402	0.000709005
11	300	0.000933499	0.0017537	0.00113721	0.00040875	0.000794659
12	330	0.000980315	0.00191066	0.0011424	0.000419071	0.000779985
13	360	0.00100381	0.00192752	0.00118673	0.000429538	0.000794568
14	390	0.000909951	0.00196538	0.00119573	0.000411919	0.000805786
15	690	0.000932987	0.00201357	0.00130554	0.00044537	0.00084147
16	990	0.000972952	0.00182899	0.00141307	0.00041121	0.000909622
17	1290	0.00087266	0.00179004	0.00146155	0.000411312	0.000999963
18	1590	0.00112435	0.00175738	0.00155232	0.000472574	0.000973277
19	1890	0.00120565	0.00169222	0.00151113	0.000445547	0.000994985
20	2190	0.00106772	0.00176998	0.00149606	0.00037912	0.00114491
21	2490	0.00104023	0.00165892	0.0014327	0.000246315	0.00118277
22	2790	0.00106751	0.00178124	0.00130006	0.000217743	0.00122754
23	3090	0.000992246	0.00172901	0.00145872	0.000335898	0.00105284
24	3390	0.000994773	0.00175964	0.00146394	0.000535136	0.00125101
25	3690	0.00103137	0.00157522	0.00146697	0.000484441	0.00110023
26	3990	0.000897273	0.00186473	0.00158875	0.000568597	0.000987445
27	4290	0.000861356	0.00152875	0.00149829	0.000562928	0.00114734
28	4590	0.000955372	0.00138207	0.00148609	0.000618677	0.00119183
		Normalized Data
	Time_(sec)	Roi1_corr_norm	Roi2_corr_norm	Roi3_corr_norm	Roi4_corr_norm	Roi5_corr_norm
1	0	1	1	1	1	1
2	30	0.934906	0.984504	1.00987	0.984277	0.953059
3	60	0.944791	1.00014	1.01481	0.988174	0.918162
4	90	0.961246	1.00333	1.01742	1.04271	0.913746
5	120	0.951688	0.992484	1.02697	0.953835	0.984006
6	150	1.01573	0.981077	1.04565	1.02989	0.872513
7	180	0.939823	0.96969	1.00672	1.02944	0.929958
8	210	0.630373	0.490457	0.533309	0.455571	0.416515
9	240	0.689634	0.573353	0.6038	0.494428	0.536154
10	270	0.663386	0.63101	0.592812	0.526987	0.514276
11	300	0.762811	0.641174	0.580951	0.52232	0.576405
12	330	0.801066	0.698559	0.5836	0.53551	0.565761
13	360	0.820268	0.704723	0.606248	0.548885	0.576339
14	390	0.743568	0.718567	0.610846	0.52637	0.584475
15	690	0.762393	0.736187	0.666941	0.569116	0.610359
16	990	0.79505	0.668702	0.721879	0.525465	0.659793
17	1290	0.713096	0.65446	0.746645	0.525594	0.725322
18	1590	0.918764	0.642518	0.793014	0.603879	0.705965
19	1890	0.985204	0.618698	0.77197	0.569342	0.721711
20	2190	0.872491	0.647126	0.764275	0.484458	0.830462
21	2490	0.850025	0.606523	0.731902	0.314753	0.857919
22	2790	0.872316	0.651244	0.664145	0.278242	0.890396
23	3090	0.810816	0.632147	0.745198	0.429227	0.763675
24	3390	0.812881	0.643347	0.747866	0.683823	0.907416
25	3690	0.842784	0.57592	0.749414	0.619042	0.798052
26	3990	0.733209	0.681766	0.811624	0.726581	0.716242
27	4290	0.703859	0.558932	0.765409	0.719337	0.832219
28	4590	0.780684	0.505301	0.75918	0.790575	0.864489
		Normalize the bouton fluorescent right after bleaching to 0
	Recovery Time_(sec)
1	0	0	0	0	0	0
2	30	0.177613	0.165887	0.145631	0.0708459	0.229078
3	60	0.0989455	0.281267	0.12293	0.130209	0.187187
4	90	0.396934	0.301604	0.0984262	0.121699	0.30615
5	120	0.51159	0.41644	0.103899	0.145747	0.285769
6	150	0.56914	0.428776	0.150689	0.170133	0.306022
7	180	0.339261	0.456479	0.160188	0.129083	0.321602
8	480	0.39568	0.491738	0.276077	0.207018	0.371163
9	780	0.493558	0.356693	0.389575	0.127433	0.465816
10	1080	0.247931	0.328193	0.440739	0.127669	0.591287
11	1380	0.864345	0.304295	0.536536	0.2704	0.554224
12	1680	1.06347	0.256628	0.493059	0.207432	0.584372
13	1980	0.725658	0.313515	0.477162	0.0526679	0.792603
14	2280	0.658324	0.232265	0.410281	-0.256745	0.845176
15	2580	0.725133	0.321756	0.270299	-0.323313	0.907362
16	2880	0.540811	0.283541	0.437749	-0.048032	0.664723
17	3180	0.547001	0.305954	0.443263	0.416157	0.93995
18	3480	0.636623	0.171023	0.446459	0.298046	0.730547
19	3780	0.308212	0.382836	0.574982	0.494115	0.573901
20	4080	0.220248	0.137027	0.479506	0.480907	0.795967
21	4380	0.450503	0.0297047	0.466637	0.610792	0.857757

[truncated: 17 more sheets: sVGLUT1-1110-C6, sVGLUT1-1126-C1, sVGLUT1-1126-C4, sVGLUT1-1128-C1, sVGLUT1-1201-C1, sVGLUT1-0128-C3, sVGLUT1-0129-C3, sVGLUT1-0130-C3, KO-1110-C2, KO-1109-C3, KO-1126-C3, KO-1126-C2, KO-0128-C2, KO-0129-C1, KO-0130-C2, Sheet26, Sheet27]
