# Supplementary material for: A proline-rich motif on VGLUT1 reduces synaptic vesicle super-pool and spontaneous release frequency
Source: eLife journal article supplement (doi:10.7554/elife.50401), 2019-10-30
Supplement: supp [file elife-50401-supp-v1.zip › elife_poa_e50401_Figure_4_source_data_1.xlsx]

## Sheet: WT-1127-C3
		Raw Data
	Time_(sec)	Roi1	Roi2	Roi3	Roi4	Roi5	Ref_fluo	Background
1	0	2408848	2066473	2101689	2432281	2057453	621536661	45803857
2	30	2.41558e+06	2.09854e+06	2.17751e+06	2.46978e+06	2.09935e+06	6.26145e+08	4.58114e+07			Filter out due to large abrupt change.
3	60	2.39995e+06	2.18877e+06	2.01835e+06	2.55451e+06	2.08884e+06	6.23126e+08	4.57234e+07
4	90	2.33667e+06	2.11904e+06	2.01374e+06	2.53944e+06	2.0912e+06	6.1912e+08	4.55561e+07
5	120	2.38764e+06	2.16221e+06	2.06618e+06	2.61012e+06	2.08311e+06	6.21121e+08	4.56936e+07
6	150	2.40236e+06	2.1261e+06	2.09251e+06	2.55649e+06	2.08002e+06	6.22548e+08	4.59056e+07
7	180	2.33791e+06	2.10261e+06	1.94719e+06	2.55822e+06	2.11346e+06	6.19858e+08	4.58529e+07
8	210	1.84256e+06	1.68105e+06	1.75105e+06	1.80426e+06	1.64631e+06	6.18136e+08	4.57149e+07
9	240	1.88489e+06	1.77885e+06	1.82205e+06	1.92472e+06	1.72722e+06	6.20906e+08	4.58875e+07
10	270	1.92863e+06	1.92184e+06	1.89576e+06	1.96223e+06	1.66877e+06	6.19924e+08	4.57893e+07
11	300	2.02118e+06	1.8289e+06	1.87739e+06	1.86515e+06	1.75613e+06	6.21647e+08	4.57791e+07
12	330	2.01895e+06	1.79342e+06	1.83825e+06	2.12455e+06	1.7154e+06	6.17309e+08	4.57304e+07
13	360	2.04703e+06	1.79995e+06	1.88521e+06	2.11686e+06	1.72629e+06	6.18832e+08	4.57558e+07
14	390	2.03909e+06	1.80798e+06	1.93567e+06	2.07339e+06	1.73302e+06	6.14878e+08	4.56375e+07
15	690	2.10448e+06	1.86357e+06	1.95133e+06	2.16612e+06	1.73971e+06	6.19881e+08	4.57179e+07
16	990	2.03881e+06	1.85716e+06	2.01694e+06	2.77598e+06	1.745e+06	6.22996e+08	4.57207e+07
17	1290	2.1969e+06	1.93043e+06	1.97316e+06	2.35118e+06	1.786e+06	6.24008e+08	4.58948e+07
18	1590	2.13338e+06	1.8782e+06	2.01674e+06	2.30073e+06	1.8656e+06	6.18771e+08	4.57141e+07
19	1890	2.06273e+06	1.92984e+06	2.16615e+06	2.23873e+06	1.88627e+06	6.19096e+08	4.60065e+07
20	2190	2.10495e+06	1.87504e+06	2.20888e+06	2.27153e+06	1.89661e+06	6.21253e+08	4.60505e+07
21	2490	2.10927e+06	1.96523e+06	2.14579e+06	2.48449e+06	1.92369e+06	6.20611e+08	4.60163e+07
22	2790	2.08687e+06	1.88148e+06	2.17836e+06	2.30739e+06	1.90554e+06	6.22432e+08	4.61253e+07
23	3090	2.06263e+06	1.88112e+06	2.1518e+06	2.41381e+06	1.98229e+06	6.18244e+08	4.59245e+07
24	3390	2.23913e+06	1.96454e+06	2.07848e+06	2.30532e+06	1.94932e+06	6.14284e+08	4.58255e+07
25	3690	2.11559e+06	1.83991e+06	2.07447e+06	2.30583e+06	1.97888e+06	6.15108e+08	4.57292e+07
26	3990	2.26839e+06	1.99062e+06	2.12896e+06	2.24053e+06	1.99816e+06	6.17043e+08	4.59254e+07
27	4290	2.20577e+06	1.86747e+06	2.2053e+06	2.13979e+06	2.00338e+06	6.19599e+08	4.59908e+07
28	4590	2.22462e+06	1.84472e+06	2.0709e+06	2.07402e+06	1.9448e+06	6.14044e+08	4.5798e+07
		Background corrected Data
	Time_(sec)	Roi1-bkgd-corr	Roi2-bkgd-corr	Roi3-bkgd-corr	Roi4-bkgd-corr	Roi5-bkgd-corr	Ref_fluo-bkgd-corr
1	0	1.04418e+06	701805	737021	1.06761e+06	692785	1.42608e+08
2	30	1.05069e+06	733648	812620	1.10489e+06	734459	1.47138e+08
3	60	1.03768e+06	826499	656080	1.19224e+06	726571	1.45039e+08
4	90	979381	761751	656455	1.18216e+06	733913	1.42782e+08
5	120	1.02625e+06	800830	704796	1.24874e+06	721728	1.43346e+08
6	150	1.03467e+06	758404	724810	1.18879e+06	712325	1.42556e+08
7	180	971778	736478	581066	1.19209e+06	747335	1.40417e+08
8	210	480537	319034	389028	442244	284295	1.40137e+08
9	240	517729	411691	454891	557565	360057	1.41103e+08
10	270	564396	557604	531528	597991	304532	1.41147e+08
11	300	657250	464973	513458	501220	392195	1.42977e+08
12	330	656473	430945	475768	762070	352920	1.39148e+08
13	360	683795	436712	521969	753625	363053	1.40406e+08
14	390	679382	448266	575956	713679	373311	1.37689e+08
15	690	742374	501466	589219	804011	377599	1.41851e+08
16	990	676622	494972	654750	1.41379e+06	382812	1.44937e+08
17	1290	829522	563052	605786	983807	418625	1.44129e+08
18	1590	771381	516201	654741	938739	503604	1.40781e+08
19	1890	692024	559135	795442	868023	515560	1.38048e+08
20	2190	732929	503020	836862	899516	524598	1.39746e+08
21	2490	738272	594231	774796	1.1135e+06	552687	1.39461e+08
22	2790	712626	507235	804112	933144	531294	1.40142e+08
23	3090	694373	512863	783537	1.04555e+06	614030	1.38055e+08
24	3390	873814	599233	713170	940011	584012	1.35129e+08
25	3690	753145	477469	712030	943382	616435	1.36959e+08
26	3990	900098	622332	760669	872242	629874	1.36843e+08
27	4290	835535	497230	835066	769552	633145	1.38716e+08
28	4590	860121	480223	706402	709523	580310	1.35176e+08
		Bleaching Corrected Data
	Time_(sec)	Roi1-bkgd_bleach-corr	Roi2-bkgd_bleach-corr	Roi3-bkgd_bleach-corr	Roi4-bkgd_bleach-corr	Roi5-bkgd_bleach-corr
1	0	0.00732202	0.00492121	0.00516815	0.00748634	0.00485796
2	30	0.00714086	0.00498612	0.00552284	0.00750922	0.00499163
3	60	0.00715453	0.00569848	0.00452349	0.00822013	0.0050095
4	90	0.00685926	0.00533505	0.00459759	0.00827943	0.00514008
5	120	0.0071593	0.00558671	0.00491676	0.00871139	0.00503488
6	150	0.00725795	0.00532003	0.00508438	0.00833908	0.0049968
7	180	0.00692067	0.00524495	0.00413816	0.00848969	0.00532226
8	210	0.00342904	0.00227658	0.00277604	0.00315579	0.00202868
9	240	0.00366916	0.00291766	0.00322382	0.00395147	0.00255173
10	270	0.00399864	0.00395052	0.00376578	0.00423666	0.00215756
11	300	0.0045969	0.00325208	0.00359119	0.0035056	0.00274306
12	330	0.00471779	0.00309701	0.00341914	0.00547667	0.00253628
13	360	0.00487013	0.00311035	0.00371757	0.00536747	0.00258574
14	390	0.0049342	0.00325565	0.00418304	0.00518329	0.00271127
15	690	0.00523346	0.00353515	0.00415377	0.00566798	0.00266193
16	990	0.0046684	0.00341509	0.00451749	0.00975455	0.00264124
17	1290	0.00575542	0.00390659	0.00420309	0.00682589	0.00290452
18	1590	0.00547931	0.00366671	0.00465079	0.0066681	0.00357722
19	1890	0.00501291	0.00405029	0.00576206	0.00628782	0.00373464
20	2190	0.00524473	0.00359953	0.00598845	0.0064368	0.00375394
21	2490	0.00529374	0.0042609	0.00555563	0.00798427	0.00396302
22	2790	0.00508501	0.00361942	0.00573782	0.00665854	0.0037911
23	3090	0.00502969	0.00371492	0.00567555	0.00757343	0.00444773
24	3390	0.00646651	0.00443452	0.0052777	0.0069564	0.00432188
25	3690	0.00549904	0.00348621	0.00519883	0.00688804	0.00450085
26	3990	0.00657758	0.00454777	0.00555869	0.00637402	0.00460289
27	4290	0.00602333	0.00358451	0.00601995	0.00554766	0.00456431
28	4590	0.00636295	0.00355257	0.00522578	0.00524886	0.00429298
		Normalized Data
	Time_(sec)	Roi1_corr_norm	Roi2_corr_norm	Roi3_corr_norm	Roi4_corr_norm	Roi5_corr_norm
1	0	1	1	1	1	1
2	30	0.975258	1.01319	1.06863	1.00306	1.02752
3	60	0.977125	1.15794	0.875262	1.09802	1.03119
4	90	0.936799	1.08409	0.889601	1.10594	1.05807
5	120	0.977776	1.13523	0.951357	1.16364	1.03642
6	150	0.99125	1.08104	0.98379	1.11391	1.02858
7	180	0.945186	1.06578	0.800703	1.13402	1.09558
8	210	0.468318	0.462606	0.537144	0.42154	0.4176
9	240	0.501112	0.592875	0.623786	0.527825	0.525268
10	270	0.546112	0.802754	0.728651	0.565919	0.444128
11	300	0.627818	0.66083	0.69487	0.468267	0.564653
12	330	0.644329	0.629319	0.661579	0.731555	0.522088
13	360	0.665134	0.63203	0.719323	0.716969	0.532268
14	390	0.673885	0.661555	0.809387	0.692366	0.558109
15	690	0.714756	0.71835	0.803725	0.757109	0.547953
16	990	0.637584	0.693954	0.874102	1.30298	0.543693
17	1290	0.786043	0.793827	0.813268	0.91178	0.597889
18	1590	0.748333	0.745082	0.899894	0.890702	0.736363
19	1890	0.684635	0.823026	1.11492	0.839906	0.768766
20	2190	0.716295	0.731432	1.15872	0.859806	0.77274
21	2490	0.722989	0.865823	1.07497	1.06651	0.815777
22	2790	0.694482	0.735474	1.11023	0.889426	0.780389
23	3090	0.686927	0.75488	1.09818	1.01163	0.915555
24	3390	0.883159	0.901104	1.0212	0.929212	0.88965
25	3690	0.751027	0.708404	1.00594	0.920081	0.92649
26	3990	0.898329	0.924116	1.07557	0.85142	0.947494
27	4290	0.822632	0.728379	1.16482	0.741038	0.939553
28	4590	0.869016	0.721889	1.01115	0.701126	0.8837
		Normalize the bouton fluorescent right after bleaching to 0
	Recovery Time_(sec)
1	0	0	0	0	0	0
2	30	0.0651197	0.212114	0.215884	0.159389	0.173094
3	60	0.154477	0.553854	0.477178	0.216516	0.0426484
4	90	0.316723	0.322762	0.393004	0.0700735	0.236412
5	120	0.349508	0.271454	0.310053	0.46491	0.167982
6	150	0.390822	0.275869	0.453934	0.443036	0.184348
7	180	0.408197	0.323943	0.678347	0.406141	0.225891
8	480	0.489357	0.41642	0.664237	0.503232	0.209563
9	780	0.336115	0.376697	0.839596	1.32184	0.202716
10	1080	0.630912	0.539318	0.688015	0.735181	0.289844
11	1380	0.556032	0.459948	0.903861	0.703572	0.512463
12	1680	0.429545	0.586862	1.43963	0.627397	0.564556
13	1980	0.492412	0.437722	1.54878	0.65724	0.570944
14	2280	0.505706	0.656548	1.34011	0.967222	0.640133
15	2580	0.449099	0.444303	1.42794	0.701658	0.583241
16	2880	0.434096	0.475902	1.39793	0.884925	0.800542
17	3180	0.823759	0.713993	1.20611	0.761323	0.758895
18	3480	0.561381	0.400226	1.16809	0.74763	0.818122
19	3780	0.853882	0.751464	1.34158	0.644663	0.851888
20	4080	0.703569	0.432751	1.56397	0.47913	0.839122
21	4380	0.795674	0.422183	1.18108	0.419277	0.74933

## Sheet: WT-1129-C4
		Raw Data
	Time_(sec)	Roi1	Roi2	Roi3	Roi4	Roi5	Ref_fluo	Background
1	0	1669270	1641335	1879349	1619277	1569555	361688269	34022477
2	30	1.6856e+06	1.63685e+06	1.88004e+06	1.61254e+06	1.54914e+06	3.59433e+08	3.39821e+07
3	60	1.6661e+06	1.66405e+06	1.85991e+06	1.64604e+06	1.55913e+06	3.60312e+08	3.39824e+07
4	90	1.68532e+06	1.6517e+06	1.89096e+06	1.62809e+06	1.57111e+06	3.62018e+08	3.40065e+07
5	120	1.68132e+06	1.66158e+06	1.88637e+06	1.60685e+06	1.5595e+06	3.61813e+08	3.39808e+07
6	150	1.66777e+06	1.66773e+06	1.8767e+06	1.61708e+06	1.5523e+06	3.61302e+08	3.39652e+07
7	180	1.67151e+06	1.656e+06	1.86114e+06	1.60323e+06	1.54636e+06	3.6006e+08	3.39518e+07
8	210	1.39279e+06	1.36361e+06	1.42213e+06	1.34167e+06	1.3191e+06	3.59176e+08	3.39487e+07
9	240	1.43157e+06	1.40157e+06	1.44292e+06	1.38713e+06	1.34379e+06	3.59694e+08	3.39355e+07
10	270	1.43744e+06	1.41652e+06	1.49097e+06	1.39223e+06	1.34608e+06	3.60375e+08	3.39323e+07
11	300	1.46804e+06	1.41143e+06	1.48546e+06	1.41208e+06	1.35596e+06	3.59197e+08	3.39451e+07
12	330	1.46308e+06	1.42033e+06	1.49035e+06	1.39297e+06	1.36849e+06	3.58307e+08	3.39113e+07
13	360	1.45907e+06	1.42591e+06	1.48249e+06	1.40935e+06	1.36239e+06	3.58721e+08	3.38588e+07
14	390	1.44793e+06	1.43448e+06	1.50002e+06	1.4101e+06	1.36127e+06	3.58878e+08	3.38895e+07
15	690	1.50551e+06	1.44303e+06	1.52303e+06	1.50347e+06	1.35896e+06	3.62458e+08	3.3957e+07
16	990	1.49366e+06	1.49739e+06	1.53377e+06	1.43785e+06	1.35459e+06	3.64741e+08	3.39407e+07
17	1290	1.50929e+06	1.51221e+06	1.56736e+06	1.446e+06	1.34417e+06	3.63497e+08	3.38683e+07
18	1590	1.57587e+06	1.51638e+06	1.55502e+06	1.49136e+06	1.35909e+06	3.63765e+08	3.39248e+07
19	1890	1.54442e+06	1.52587e+06	1.57482e+06	1.52683e+06	1.35342e+06	3.64251e+08	3.38442e+07
20	2190	1.55981e+06	1.52633e+06	1.61705e+06	1.53803e+06	1.3536e+06	3.62085e+08	3.38359e+07
21	2490	1.54663e+06	1.57404e+06	1.61836e+06	1.55195e+06	1.37621e+06	3.648e+08	3.38599e+07
22	2790	1.54769e+06	1.58947e+06	1.60733e+06	1.54864e+06	1.39012e+06	3.65143e+08	3.38239e+07
23	3090	1.55602e+06	1.56772e+06	1.6249e+06	1.54967e+06	1.38881e+06	3.65374e+08	3.38927e+07
24	3390	1.59134e+06	1.58299e+06	1.64675e+06	1.51736e+06	1.40312e+06	3.67081e+08	3.38747e+07
25	3690	1.58629e+06	1.58798e+06	1.66545e+06	1.51501e+06	1.42378e+06	3.67873e+08	3.39272e+07
26	3990	1.58605e+06	1.55952e+06	1.62843e+06	1.53099e+06	1.39797e+06	3.67079e+08	3.38788e+07
27	4290	1.5872e+06	1.58143e+06	1.65592e+06	1.54516e+06	1.39312e+06	3.6843e+08	3.39383e+07
28	4590	1.60314e+06	1.58507e+06	1.64911e+06	1.55061e+06	1.39266e+06	3.68593e+08	3.38827e+07
		Background corrected Data
	Time_(sec)	Roi1-bkgd-corr	Roi2-bkgd-corr	Roi3-bkgd-corr	Roi4-bkgd-corr	Roi5-bkgd-corr	Ref_fluo-bkgd-corr
1	0	419857	391922	629936	369864	320142	6.92856e+07
2	30	437670	388915	632110	364610	301208	6.73773e+07
3	60	418157	416111	611969	398100	311194	6.82539e+07
4	90	436493	402868	642127	379259	322278	6.97527e+07
5	120	433432	413695	638486	358964	311615	6.9768e+07
6	150	420461	420425	629388	369768	304987	6.93916e+07
7	180	424698	409181	614323	356411	299544	6.82651e+07
8	210	146091	116910	175426	94970.3	72401.2	6.74078e+07
9	240	185356	155350	196706	140907	97569.1	6.80386e+07
10	270	191333	170416	244872	146123	99979.5	6.87473e+07
11	300	221468	164853	238892	165512	109384	6.74588e+07
12	330	217746	175002	245016	147636	123157	6.68596e+07
13	360	215664	182507	239089	165945	118991	6.77253e+07
14	390	203401	189953	255490	165569	116746	6.76186e+07
15	690	258498	196023	276018	256465	111953	7.06181e+07
16	990	247244	250982	287357	191437	108177	7.3041e+07
17	1290	265537	268459	323608	202248	100417	7.24195e+07
18	1590	330048	270555	309197	245530	113266	7.22022e+07
19	1890	301554	283001	331955	283960	110555	7.33799e+07
20	2190	317245	283765	374493	295466	111034	7.12854e+07
21	2490	303187	330598	374919	308511	132772	7.37945e+07
22	2790	305564	347351	365207	306517	147999	7.44468e+07
23	3090	311376	323068	380249	305020	144167	7.4087e+07
24	3390	347354	339009	402759	273377	159133	7.59483e+07
25	3690	340381	342062	419540	269098	177864	7.62891e+07
26	3990	341913	315382	384291	286851	153835	7.59113e+07
27	4290	340872	335109	409594	298836	146801	7.67509e+07
28	4590	358860	340786	404833	306328	148377	7.73918e+07
		Bleaching Corrected Data
	Time_(sec)	Roi1-bkgd_bleach-corr	Roi2-bkgd_bleach-corr	Roi3-bkgd_bleach-corr	Roi4-bkgd_bleach-corr	Roi5-bkgd_bleach-corr
1	0	0.0060598	0.00565662	0.00909188	0.00533825	0.00462061
2	30	0.00649581	0.0057722	0.00938165	0.00541147	0.00447046
3	60	0.00612649	0.00609652	0.00896606	0.00583264	0.00455937
4	90	0.00625771	0.00577567	0.00920577	0.00543719	0.00462029
5	120	0.00621248	0.00592957	0.00915156	0.0051451	0.00446644
6	150	0.00605925	0.00605873	0.00907009	0.00532871	0.00439516
7	180	0.00622131	0.005994	0.00899908	0.00522099	0.00438795
8	210	0.00216727	0.00173436	0.00260246	0.00140889	0.00107408
9	240	0.00272427	0.00228326	0.00289109	0.00207099	0.00143403
10	270	0.00278314	0.00247888	0.00356191	0.00212551	0.0014543
11	300	0.00328301	0.00244376	0.0035413	0.00245353	0.0016215
12	330	0.00325677	0.00261745	0.00366464	0.00220815	0.00184203
13	360	0.00318439	0.00269482	0.00353028	0.00245027	0.00175697
14	390	0.00300806	0.00280919	0.0037784	0.00244857	0.00172653
15	690	0.00366051	0.00277582	0.00390861	0.00363172	0.00158534
16	990	0.00338501	0.00343618	0.00393419	0.00262094	0.00148105
17	1290	0.00366665	0.003707	0.00446852	0.00279273	0.00138661
18	1590	0.00457116	0.00374719	0.00428238	0.00340058	0.00156873
19	1890	0.00410949	0.00385665	0.00452379	0.00386973	0.00150662
20	2190	0.00445034	0.00398069	0.00525343	0.00414484	0.0015576
21	2490	0.00410854	0.00447998	0.00508059	0.00418067	0.00179921
22	2790	0.00410446	0.00466576	0.00490561	0.00411727	0.00198798
23	3090	0.00420285	0.00436066	0.00513246	0.00411704	0.00194592
24	3390	0.00457356	0.00446368	0.00530307	0.00359951	0.00209528
25	3690	0.00446173	0.00448376	0.00549935	0.00352734	0.00233145
26	3990	0.00450411	0.00415461	0.00506236	0.00377877	0.00202651
27	4290	0.00444128	0.00436619	0.00533666	0.00389358	0.0019127
28	4590	0.00463693	0.00440339	0.00523096	0.00395815	0.00191722
		Normalized Data
	Time_(sec)	Roi1_corr_norm	Roi2_corr_norm	Roi3_corr_norm	Roi4_corr_norm	Roi5_corr_norm
1	0	1	1	1	1	1
2	30	1.07195	1.02043	1.03187	1.01371	0.967503
3	60	1.011	1.07777	0.986162	1.09261	0.986744
4	90	1.03266	1.02105	1.01253	1.01853	0.99993
5	120	1.02519	1.04825	1.00656	0.963817	0.966633
6	150	0.999908	1.07109	0.997604	0.998213	0.951207
7	180	1.02665	1.05964	0.989794	0.978033	0.949646
8	210	0.357647	0.306608	0.286241	0.263924	0.232453
9	240	0.449564	0.403644	0.317986	0.387953	0.310354
10	270	0.459278	0.438227	0.391769	0.398166	0.314743
11	300	0.541769	0.432018	0.389502	0.459613	0.350927
12	330	0.537439	0.462724	0.403068	0.413647	0.398655
13	360	0.525495	0.476401	0.388289	0.459001	0.380245
14	390	0.496395	0.49662	0.41558	0.458684	0.373659
15	690	0.604064	0.490721	0.429901	0.680319	0.343101
16	990	0.5586	0.607462	0.432715	0.490974	0.32053
17	1290	0.605077	0.655338	0.491485	0.523155	0.300092
18	1590	0.754342	0.662444	0.471012	0.637022	0.339507
19	1890	0.678156	0.681795	0.497564	0.724905	0.326064
20	2190	0.734404	0.703722	0.577816	0.77644	0.337099
21	2490	0.677998	0.79199	0.558805	0.783154	0.389388
22	2790	0.677325	0.824832	0.53956	0.771276	0.430241
23	3090	0.693561	0.770895	0.564511	0.771234	0.421139
24	3390	0.754738	0.789107	0.583276	0.674286	0.453463
25	3690	0.736283	0.792657	0.604864	0.660768	0.504575
26	3990	0.743277	0.734469	0.556801	0.707866	0.43858
27	4290	0.732908	0.771873	0.586971	0.729373	0.413949
28	4590	0.765194	0.77845	0.575345	0.741469	0.414927
		Normalize the bouton fluorescent right after bleaching to 0
	Recovery Time_(sec)
1	0	0	0	0	0	0
2	30	0.137959	0.131844	0.0442594	0.166404	0.104977
3	60	0.152539	0.178831	0.147126	0.180106	0.110892
4	90	0.276351	0.170395	0.143966	0.262547	0.159653
5	120	0.269851	0.212115	0.162879	0.200877	0.22397
6	150	0.251924	0.230699	0.142275	0.261726	0.199162
7	180	0.208249	0.25817	0.180324	0.261301	0.190286
8	480	0.369849	0.250156	0.20029	0.558657	0.149106
9	780	0.301612	0.408772	0.204213	0.304623	0.118691
10	1080	0.37137	0.473821	0.286149	0.347798	0.0911479
11	1380	0.595402	0.483475	0.257606	0.500567	0.144263
12	1680	0.481054	0.509767	0.294625	0.618476	0.126148
13	1980	0.565478	0.53956	0.406511	0.687618	0.141018
14	2280	0.480818	0.65949	0.380007	0.696625	0.211482
15	2580	0.479808	0.704112	0.353175	0.680689	0.266535
16	2880	0.504177	0.630828	0.387961	0.680633	0.254269
17	3180	0.595998	0.655573	0.414124	0.550562	0.297829
18	3480	0.568298	0.660396	0.444221	0.532426	0.366706
19	3780	0.578796	0.581336	0.377212	0.595615	0.277773
20	4080	0.563233	0.632157	0.419275	0.62447	0.24458
21	4380	0.611691	0.641093	0.403066	0.640699	0.245899

## Sheet: WT-1130-C4
		Raw Data
	Time_(sec)	Roi1	Roi2	Roi3	Roi4	Roi5	Ref_fluo	Background
1	0	2082912	2187303	2343376	2049213	1902253	701862416	29716220
2	30	2.08232e+06	2.15514e+06	2.3449e+06	2.01001e+06	1.92452e+06	7.01186e+08	2.96206e+07			Filter out due be large abrupt change.
3	60	2.11753e+06	2.20769e+06	2.33227e+06	2.01178e+06	1.87152e+06	7.02635e+08	2.97123e+07
4	90	2.08184e+06	2.16833e+06	2.33759e+06	2.03113e+06	1.90631e+06	7.03113e+08	2.96702e+07
5	120	2.1329e+06	2.15794e+06	2.35421e+06	1.9907e+06	1.93947e+06	704898137	2.96983e+07
6	150	2.16199e+06	2.14054e+06	2.34462e+06	1.96651e+06	1.9085e+06	7.04747e+08	2.96842e+07
7	180	2.13362e+06	2.14037e+06	2.36603e+06	2.00956e+06	1.92848e+06	7.0217e+08	2.95984e+07
8	210	1.46044e+06	1.54428e+06	1.66031e+06	1.88239e+06	1.59964e+06	7.00896e+08	2.96425e+07
9	240	1.49491e+06	1.58839e+06	1.77613e+06	1.93927e+06	1.63204e+06	7.03176e+08	2.96558e+07
10	270	1.51815e+06	1.58767e+06	1.76414e+06	1.94864e+06	1.64706e+06	7.00798e+08	2.96546e+07
11	300	1.53993e+06	1.62084e+06	1.81032e+06	1.94011e+06	1.62934e+06	702029555	2.95758e+07
12	330	1.53126e+06	1.65888e+06	1.76521e+06	1.94417e+06	1.62714e+06	7.03039e+08	2.95352e+07
13	360	1.55324e+06	1.63991e+06	1.75013e+06	1.98017e+06	1.65151e+06	6.99631e+08	2.95482e+07
14	390	1.55014e+06	1.63125e+06	1.7667e+06	2.0332e+06	1.64771e+06	7.00314e+08	2.95617e+07
15	690	1.59237e+06	1.69932e+06	1.81557e+06	1.99886e+06	1.71461e+06	7.10472e+08	2.96207e+07
16	990	1633654	1.74999e+06	1.92201e+06	2.07575e+06	1.71459e+06	7.14236e+08	2.9621e+07
17	1290	1.68692e+06	1.74998e+06	1.94386e+06	2.04808e+06	1.74547e+06	7.20486e+08	2.98879e+07
18	1590	1.6696e+06	1.80461e+06	1.90196e+06	2.15068e+06	1.7725e+06	7.18752e+08	2.96026e+07
19	1890	1.67029e+06	1.81506e+06	1.92258e+06	2.15955e+06	1.85728e+06	7.21306e+08	2.96339e+07
20	2190	1.67651e+06	1.83622e+06	1.96071e+06	2.16494e+06	1.74314e+06	7.13471e+08	2.94291e+07
21	2490	1.6776e+06	1.87386e+06	1.95909e+06	2.11705e+06	1.75276e+06	7.1718e+08	2.97171e+07
22	2790	1.70426e+06	1.88143e+06	1.97327e+06	2.05057e+06	1.74145e+06	7.21321e+08	2.9671e+07
23	3090	1.6793e+06	1.99081e+06	2.01981e+06	2.14578e+06	1.7442e+06	7.22576e+08	2.96645e+07
24	3390	1.69221e+06	1.96747e+06	2.05697e+06	2.12338e+06	1.80386e+06	722858552	2.9676e+07
25	3690	1.69381e+06	1.94034e+06	2.10462e+06	2.03128e+06	1.77793e+06	7.20995e+08	2.95979e+07
26	3990	1.71174e+06	1.98207e+06	2.16386e+06	2.04816e+06	1.60258e+06	7.32843e+08	3.22416e+07
27	4290	1.69253e+06	1.96242e+06	2.13511e+06	2.06139e+06	1.78248e+06	7.34329e+08	2.9698e+07
28	4590	1.73213e+06	1.98381e+06	2.27302e+06	2.04726e+06	1.55331e+06	7.26234e+08	2.95911e+07
		Background corrected Data
	Time_(sec)	Roi1-bkgd-corr	Roi2-bkgd-corr	Roi3-bkgd-corr	Roi4-bkgd-corr	Roi5-bkgd-corr	Ref_fluo-bkgd-corr
1	0	808660	913051	1.06912e+06	774961	628001	1.82784e+08
2	30	812170	884985	1.07475e+06	739858	654365	1.83778e+08
3	60	843444	933604	1.05819e+06	737693	597439	1.83626e+08
4	90	809560	896055	1.06531e+06	758850	634029	1.84838e+08
5	120	859412	884456	1.08072e+06	717215	665987	1.86133e+08
6	150	889106	867662	1.07174e+06	693636	635618	1.86228e+08
7	180	864424	871171	1.09683e+06	740360	659281	1.8515e+08
8	210	189350	273184	389221	611293	328552	1.83105e+08
9	240	223249	316728	504470	667603	360375	1.85153e+08
10	270	246543	316056	492531	677033	375445	182795244
11	300	271703	352612	542088	671882	361104	185403970
12	330	264773	392390	498721	677681	360650	187122837
13	360	286192	372862	483084	713126	384463	1.83488e+08
14	390	282514	363617	499067	765570	380080	1.83934e+08
15	690	322213	429164	545417	728707	444457	1.93062e+08
16	990	363485	479818	651838	805584	444421	1.96822e+08
17	1290	405308	468365	662244	766468	463862	1.98409e+08
18	1590	400220	535231	632583	881296	503118	2.01659e+08
19	1890	399562	544331	651853	888830	586555	203665134
20	2190	414567	574283	698772	903002	481201	1.99408e+08
21	2490	403306	599571	684796	842762	478465	1.98086e+08
22	2790	431946	609119	700955	778260	469139	2.03033e+08
23	3090	407266	718776	747781	873747	472163	204402237
24	3390	419687	694943	784444	850853	531336	2.04484e+08
25	3690	424626	671165	835438	762100	508747	2.03984e+08
26	3990	329197	599533	781324	665619	220044	1.69652e+08
27	4290	419058	688948	861635	787918	509007	2.15569e+08
28	4590	463240	714926	1.00414e+06	778374	284425	209342596
		Bleaching Corrected Data
	Time_(sec)	Roi1-bkgd_bleach-corr	Roi2-bkgd_bleach-corr	Roi3-bkgd_bleach-corr	Roi4-bkgd_bleach-corr	Roi5-bkgd_bleach-corr
1	0	0.00442412	0.00499524	0.0058491	0.00423976	0.00343575
2	30	0.00441929	0.0048155	0.00584809	0.00402582	0.00356062
3	60	0.00459327	0.00508426	0.00576272	0.00401737	0.00325356
4	90	0.00437983	0.00484778	0.00576347	0.00410548	0.00343018
5	120	0.0046172	0.00475175	0.00580619	0.00385324	0.00357802
6	150	0.00477428	0.00465912	0.00575496	0.00372465	0.00341311
7	180	0.00466877	0.00470521	0.005924	0.0039987	0.00356079
8	210	0.00103411	0.00149195	0.00212567	0.00333848	0.00179433
9	240	0.00120575	0.00171062	0.0027246	0.00360568	0.00194636
10	270	0.00134874	0.00172902	0.00269444	0.00370378	0.00205391
11	300	0.00146546	0.00190186	0.00292382	0.00362388	0.00194766
12	330	0.00141497	0.00209697	0.00266521	0.00362158	0.00192734
13	360	0.00155974	0.00203208	0.00263279	0.00388651	0.00209531
14	390	0.00153595	0.00197688	0.00271329	0.00416219	0.00206639
15	690	0.00166896	0.00222293	0.00282508	0.00377446	0.00230214
16	990	0.00184677	0.00243783	0.00331182	0.00409296	0.00225799
17	1290	0.00204279	0.0023606	0.00333776	0.00386306	0.0023379
18	1590	0.00198464	0.00265414	0.00313689	0.00437023	0.0024949
19	1890	0.00196186	0.00267268	0.00320061	0.00436418	0.00288
20	2190	0.00207899	0.00287993	0.00350423	0.00452841	0.00241314
21	2490	0.00203601	0.00302682	0.00345706	0.00425452	0.00241544
22	2790	0.00212746	0.00300009	0.00345241	0.00383316	0.00231065
23	3090	0.00199247	0.00351648	0.00365838	0.00427464	0.00230997
24	3390	0.00205242	0.00339853	0.00383622	0.00416099	0.00259843
25	3690	0.00208167	0.00329029	0.00409562	0.00373609	0.00249406
26	3990	0.00194042	0.00353389	0.00460544	0.00392344	0.00129703
27	4290	0.00194396	0.00319595	0.00399702	0.00365506	0.00236122
28	4590	0.00221283	0.0034151	0.00479663	0.00371818	0.00135866
		Normalized Data
	Time_(sec)	Roi1_corr_norm	Roi2_corr_norm	Roi3_corr_norm	Roi4_corr_norm	Roi5_corr_norm
1	0	1	1	1	1	1
2	30	0.998908	0.964019	0.999826	0.94954	1.03635
3	60	1.03823	1.01782	0.985232	0.947546	0.946973
4	90	0.989988	0.97048	0.985359	0.968329	0.99838
5	120	1.04364	0.951256	0.992663	0.908837	1.04141
6	150	1.07915	0.932713	0.983904	0.878506	0.99341
7	180	1.0553	0.94194	1.0128	0.943144	1.03639
8	210	0.233743	0.298675	0.363418	0.787422	0.522254
9	240	0.272541	0.342451	0.465816	0.850445	0.566502
10	270	0.30486	0.346133	0.460659	0.873583	0.597806
11	300	0.331244	0.380734	0.499876	0.854738	0.56688
12	330	0.319831	0.419793	0.455661	0.854196	0.560967
13	360	0.352553	0.406805	0.450119	0.916682	0.609856
14	390	0.347177	0.395754	0.463882	0.981706	0.601438
15	690	0.37724	0.44501	0.482994	0.890255	0.670056
16	990	0.417433	0.488031	0.56621	0.965377	0.657204
17	1290	0.461739	0.47257	0.570646	0.911152	0.680463
18	1590	0.448595	0.531334	0.536304	1.03077	0.726158
19	1890	0.443445	0.535045	0.547197	1.02935	0.838244
20	2190	0.469921	0.576536	0.599105	1.06808	0.702363
21	2490	0.460208	0.605941	0.591042	1.00348	0.703031
22	2790	0.480878	0.600591	0.590246	0.9041	0.672531
23	3090	0.450366	0.703966	0.62546	1.00823	0.672334
24	3390	0.463917	0.680354	0.655865	0.981421	0.756292
25	3690	0.470527	0.658686	0.700213	0.881203	0.725914
26	3990	0.438601	0.707452	0.787377	0.925392	0.37751
27	4290	0.4394	0.639799	0.683357	0.862091	0.687251
28	4590	0.500174	0.683671	0.820063	0.87698	0.395448
		Normalize the bouton fluorescent right after bleaching to 0
	Recovery Time_(sec)
1	0	0	0	0	0	0
2	30	0.0487672	0.0653726	0.16232	0.406992	0.0911765
3	60	0.0893912	0.0708706	0.154145	0.556416	0.15568
4	90	0.122555	0.122541	0.216311	0.434719	0.0919559
5	120	0.108209	0.18087	0.146223	0.431218	0.0797719
6	150	0.149339	0.161473	0.137437	0.834745	0.18051
7	180	0.142582	0.144971	0.159254	1.25466	0.163164
8	480	0.18037	0.218526	0.189551	0.664084	0.304556
9	780	0.23089	0.282772	0.321465	1.14921	0.278074
10	1080	0.286581	0.259683	0.328496	0.799033	0.326
11	1380	0.27006	0.347438	0.274057	1.57154	0.420156
12	1680	0.263587	0.352979	0.291325	1.56232	0.651117
13	1980	0.296865	0.414939	0.37361	1.81247	0.371126
14	2280	0.284656	0.45885	0.360827	1.39529	0.372503
15	2580	0.310638	0.45086	0.359567	0.75349	0.309656
16	2880	0.272285	0.605234	0.415387	1.42595	0.309249
17	3180	0.289318	0.569973	0.463585	1.25282	0.48225
18	3480	0.297626	0.537615	0.533885	0.605627	0.419654
19	3780	0.257497	0.61044	0.672056	0.890992	-0.298252
20	4080	0.258502	0.509412	0.507165	0.482206	0.339987
21	4380	0.334892	0.574927	0.72387	0.578356	-0.26129

## Sheet: WT-0131-C1
		Raw Data
	Time_(sec)	Roi1	Roi2	Roi3	Roi4	Roi5	Ref_fluo	Background
1	0	2292718	1395464	1274858	1380038	1609473	470246246	40558816			Filter out due to wrong targeting.
2	30	2.37842e+06	1.43972e+06	1.29782e+06	1.5794e+06	1.6473e+06	4.8971e+08	4.04921e+07
3	60	2.34434e+06	1.40086e+06	1.2972e+06	1.44414e+06	1.57763e+06	4.91535e+08	4.04728e+07
4	90	2.32776e+06	1.43058e+06	1.32514e+06	1.42203e+06	1.58914e+06	4.91386e+08	4.07135e+07
5	120	2.38253e+06	1.40947e+06	1.30058e+06	1.42312e+06	1.5786e+06	4.94519e+08	4.06728e+07
6	150	2.31977e+06	1.43461e+06	1.26602e+06	1.35967e+06	1.56141e+06	4.91022e+08	4.05562e+07
7	180	2.25621e+06	1.40336e+06	1.29767e+06	1.37666e+06	1.58373e+06	4.91588e+08	4.05747e+07
8	210	1.02255e+06	817203	822927	813178	818401	4.89425e+08	4.06477e+07
9	240	1.14568e+06	884852	842138	899106	849259	4.90169e+08	4.06675e+07
10	270	1.22957e+06	901603	835404	893882	904837	4.93165e+08	4.07228e+07
11	300	1.28608e+06	925902	862276	922601	919915	4.93268e+08	4.08448e+07
12	330	1.29638e+06	899679	861321	887366	904060	4.87082e+08	4.06392e+07
13	360	1.53759e+06	882473	842309	901154	901058	4.91165e+08	4.07564e+07
14	390	1.56761e+06	936256	861552	940079	915949	4.97245e+08	4.08858e+07
15	690	1.56415e+06	924157	864321	925952	903705	4.99199e+08	4.07094e+07
16	990	1.69813e+06	979837	917525	954089	1.02528e+06	5.05236e+08	4.08822e+07
17	1290	1.76986e+06	1.02868e+06	948878	1.23171e+06	1.20586e+06	5.02886e+08	4.07937e+07
18	1590	1.86224e+06	1.0526e+06	1.02166e+06	1.0093e+06	1.11258e+06	5.05357e+08	4.08391e+07
19	1890	1.95523e+06	1.00281e+06	1.01995e+06	1.00251e+06	1.15831e+06	5.07009e+08	4.08412e+07
20	2190	1.91723e+06	1.06601e+06	964304	1.01102e+06	846834	5.13141e+08	4.11457e+07
21	2490	2.15473e+06	1.07692e+06	1.00415e+06	1.06105e+06	944785	5.10724e+08	4.09665e+07
22	2790	1.97889e+06	1.1115e+06	990429	1.0838e+06	859465	5.08634e+08	4.08951e+07
23	3090	2.1613e+06	1.13111e+06	1.11899e+06	1.06949e+06	977216	5.10121e+08	4.10566e+07
24	3390	2.17494e+06	1.16859e+06	1.05157e+06	1.05147e+06	1.10707e+06	5.10785e+08	4.07971e+07
25	3690	2.23193e+06	1.20393e+06	1.13135e+06	983528	888975	5.1162e+08	4.10897e+07
26	3990	2.17979e+06	1.24047e+06	1.25551e+06	1.04982e+06	890233	5.09293e+08	4.08863e+07
27	4290	2.3889e+06	1.24021e+06	1.19957e+06	1.20226e+06	899223	5.08994e+08	4.09647e+07
28	4590	2.42447e+06	1.24056e+06	1.21101e+06	1.08119e+06	791594	5.09307e+08	4.09248e+07
		Background corrected Data
	Time_(sec)	Roi1-bkgd-corr	Roi2-bkgd-corr	Roi3-bkgd-corr	Roi4-bkgd-corr	Roi5-bkgd-corr	Ref_fluo-bkgd-corr
1	0	1.60615e+06	708899	588293	693473	922908	1.66364e+08
2	30	1.69299e+06	754288	612387	893965	961860	1.86328e+08
3	60	1.65923e+06	715753	612092	759030	892520	1.88297e+08
4	90	1.63858e+06	741398	635958	732846	899954	1.86345e+08
5	120	1.69403e+06	720980	612088	734629	890104	1.89783e+08
6	150	1.63325e+06	748092	579497	673146	874886	1.8716e+08
7	180	1.56938e+06	716529	610834	689823	896896	1.87587e+08
8	210	334482	129135	134858	125109	130332	1.84877e+08
9	240	457275	196446	153732	210700	160853	1.85472e+08
10	270	540232	212263	146064	204542	215497	1.88055e+08
11	300	594677	234496	170870	231195	228508	1.87243e+08
12	330	608456	211754	173396	199441	216134	1.82598e+08
13	360	847679	192563	152399	211245	211148	1.85802e+08
14	390	875513	244156	169453	247979	223849	1.90913e+08
15	690	875038	235043	175207	236838	214591	1.94189e+08
16	990	1.00609e+06	287798	225486	262050	333245	1.98931e+08
17	1290	1.07932e+06	338137	258337	541168	515320	1.97244e+08
18	1590	1.17093e+06	361290	330347	317990	421272	1.99375e+08
19	1890	1.26389e+06	311468	328605	311162	466967	2.01011e+08
20	2190	1.22073e+06	369506	267804	314519	150335	2.04862e+08
21	2490	1.46126e+06	383456	310688	367583	251320	2.03787e+08
22	2790	1.28663e+06	419241	298172	391541	167207	2.02232e+08
23	3090	1.4663e+06	436121	423997	374499	282226	2.02509e+08
24	3390	1.48434e+06	477990	360971	360874	416477	2.05118e+08
25	3690	1.53638e+06	508377	435803	287976	193423	2.0376e+08
26	3990	1.48769e+06	548358	563403	357715	198125	2.02957e+08
27	4290	1.69547e+06	546773	506131	508821	205788	2.02071e+08
28	4590	1.73171e+06	547804	518249	388427	98833.6	2.02683e+08
		Bleaching Corrected Data
	Time_(sec)	Roi1-bkgd_bleach-corr	Roi2-bkgd_bleach-corr	Roi3-bkgd_bleach-corr	Roi4-bkgd_bleach-corr	Roi5-bkgd_bleach-corr
1	0	0.00965445	0.00426113	0.00353618	0.00416841	0.00554752
2	30	0.00908608	0.00404818	0.00328661	0.00479781	0.0051622
3	60	0.00881178	0.00380119	0.00325067	0.00403102	0.00473996
4	90	0.00879325	0.00397863	0.0034128	0.00393273	0.0048295
5	120	0.00892615	0.00379897	0.0032252	0.00387089	0.00469011
6	150	0.00872649	0.00399708	0.00309627	0.00359664	0.00467454
7	180	0.00836617	0.00381972	0.00325628	0.00367736	0.00478124
8	210	0.00180921	0.000698489	0.000729445	0.000676716	0.000704964
9	240	0.00246546	0.00105917	0.000828871	0.00113602	0.000867265
10	270	0.00287274	0.00112873	0.000776712	0.00108767	0.00114593
11	300	0.00317597	0.00125236	0.000912556	0.00123473	0.00122038
12	330	0.00333222	0.00115967	0.000949604	0.00109224	0.00118366
13	360	0.00456227	0.00103639	0.000820224	0.00113693	0.00113642
14	390	0.00458592	0.00127889	0.000887589	0.00129891	0.00117252
15	690	0.00450612	0.00121038	0.000902252	0.00121963	0.00110506
16	990	0.00505747	0.00144672	0.00113349	0.00131729	0.00167518
17	1290	0.005472	0.00171431	0.00130973	0.00274364	0.0026126
18	1590	0.00587302	0.00181212	0.00165692	0.00159493	0.00211296
19	1890	0.00628764	0.00154951	0.00163476	0.00154798	0.00232309
20	2190	0.00595881	0.00180368	0.00130724	0.00153528	0.000733835
21	2490	0.00717052	0.00188165	0.00152457	0.00180376	0.00123325
22	2790	0.00636212	0.00207307	0.0014744	0.0019361	0.000826807
23	3090	0.00724068	0.00215359	0.00209371	0.00184929	0.00139364
24	3390	0.00723652	0.00233032	0.00175982	0.00175935	0.00203042
25	3690	0.00754013	0.00249497	0.0021388	0.00141331	0.000949267
26	3990	0.00733005	0.00270184	0.00277597	0.00176251	0.00097619
27	4290	0.00839046	0.00270585	0.00250472	0.00251803	0.00101839
28	4590	0.00854394	0.00270277	0.00255695	0.00191643	0.000487627
		Normalized Data
	Time_(sec)	Roi1_corr_norm	Roi2_corr_norm	Roi3_corr_norm	Roi4_corr_norm	Roi5_corr_norm
1	0	1	1	1	1	1
2	30	0.941129	0.950025	0.929425	1.15099	0.930541
3	60	0.912717	0.892061	0.919262	0.967042	0.854428
4	90	0.910798	0.933702	0.965109	0.943462	0.87057
5	120	0.924564	0.89154	0.912057	0.928626	0.845443
6	150	0.903883	0.938032	0.875599	0.862834	0.842637
7	180	0.866561	0.89641	0.920847	0.882197	0.861869
8	210	0.187397	0.163921	0.206281	0.162344	0.127077
9	240	0.255371	0.248565	0.234397	0.272531	0.156334
10	270	0.297556	0.264889	0.219647	0.260933	0.206566
11	300	0.328964	0.293903	0.258063	0.296211	0.219987
12	330	0.345148	0.272151	0.268539	0.262028	0.213368
13	360	0.472557	0.24322	0.231952	0.272751	0.204851
14	390	0.475006	0.300128	0.251002	0.311608	0.211359
15	690	0.466741	0.284052	0.255149	0.292588	0.199199
16	990	0.523849	0.339516	0.32054	0.316018	0.301969
17	1290	0.566785	0.402313	0.370381	0.658199	0.470948
18	1590	0.608323	0.425266	0.468561	0.382624	0.380884
19	1890	0.651269	0.363638	0.462296	0.371361	0.418762
20	2190	0.617208	0.423288	0.369677	0.368312	0.132282
21	2490	0.742717	0.441584	0.431135	0.432721	0.222306
22	2790	0.658984	0.486506	0.416948	0.464469	0.149041
23	3090	0.749984	0.505402	0.592084	0.443645	0.251219
24	3390	0.749553	0.546877	0.497661	0.422067	0.366005
25	3690	0.781001	0.585519	0.604833	0.339053	0.171116
26	3990	0.759241	0.634067	0.785019	0.422827	0.175969
27	4290	0.869077	0.635007	0.708313	0.604076	0.183576
28	4590	0.884974	0.634284	0.723082	0.459752	0.0879001
		Normalize the bouton fluorescent right after bleaching to 0
	Recovery Time_(sec)
1	0	0	0	0	0	0
2	30	0.0924299	0.11066	0.0387564	0.137765	0.0385247
3	60	0.149793	0.132002	0.0184244	0.123264	0.10467
4	90	0.192501	0.169933	0.0713766	0.167372	0.122343
5	120	0.214508	0.141496	0.0858179	0.124633	0.113627
6	150	0.387756	0.103671	0.0353856	0.138039	0.102412
7	180	0.391086	0.178071	0.0616446	0.186622	0.110981
8	480	0.379847	0.157054	0.06736	0.162842	0.0949697
9	780	0.457503	0.229566	0.157496	0.192136	0.230297
10	1080	0.515887	0.311662	0.226197	0.619958	0.452807
11	1380	0.572369	0.341671	0.361529	0.275412	0.334211
12	1680	0.630766	0.2611	0.352893	0.26133	0.384088
13	1980	0.584451	0.339084	0.225226	0.257518	0.00685309
14	2280	0.755116	0.363004	0.30994	0.338047	0.125396
15	2580	0.641257	0.421733	0.290385	0.377741	0.0289215
16	2880	0.764998	0.446437	0.531793	0.351705	0.16347
17	3180	0.764411	0.50066	0.401641	0.324727	0.314619
18	3480	0.807173	0.551178	0.549367	0.220935	0.0579893
19	3780	0.777585	0.614647	0.797735	0.325676	0.0643798
20	4080	0.926939	0.615876	0.692004	0.552288	0.0743975
21	4380	0.948555	0.614931	0.712362	0.371843	-0.0515882

## Sheet: WT-0205-C1
		Raw Data
	Time_(sec)	Roi1	Roi2	Roi3	Roi4	Roi5	Ref_fluo	Background
1	0	1666070	2283001	1494733	1515908	1456691	793778490	18857835
2	30	1.66307e+06	2.35718e+06	1.48402e+06	1.52748e+06	1.49011e+06	8.04831e+08	1.89215e+07			Filter out due to wrong targeting.
3	60	1.66837e+06	2.36283e+06	1.48316e+06	1.54316e+06	1.477e+06	8.04013e+08	1.89021e+07
4	90	1.64853e+06	2.34776e+06	1.47494e+06	1.52826e+06	1.49265e+06	8.0508e+08	1.88813e+07
5	120	1.67582e+06	2.33347e+06	1.4809e+06	1.54606e+06	1.48946e+06	8.09306e+08	1.89207e+07
6	150	1.69288e+06	2.37071e+06	1.4832e+06	1.58586e+06	1.51416e+06	8.12476e+08	1.89197e+07
7	180	1.68551e+06	2.3986e+06	1.4579e+06	1.55021e+06	1.4866e+06	8.11948e+08	1.89348e+07
8	210	1.32419e+06	1.53568e+06	1.14909e+06	1.18587e+06	1.23865e+06	8.08824e+08	1.88952e+07
9	240	1.37509e+06	1.65696e+06	1.16854e+06	1.21806e+06	1.27464e+06	8.11018e+08	1.89102e+07
10	270	1.39416e+06	1.69558e+06	1.18493e+06	1.21665e+06	1.28757e+06	8.10168e+08	1.89225e+07
11	300	1.4045e+06	1.77999e+06	1.18091e+06	1.2195e+06	1.28927e+06	8.13288e+08	1.89398e+07
12	330	1.37796e+06	1.72151e+06	1.19188e+06	1.19594e+06	1.28759e+06	8.02993e+08	1.89054e+07
13	360	1.39294e+06	1.7351e+06	1.21091e+06	1.21319e+06	1.30305e+06	8.02834e+08	1.89038e+07
14	390	1.37851e+06	1.69205e+06	1.24026e+06	1.21456e+06	1.29063e+06	8.04613e+08	1.8898e+07
15	690	1.41626e+06	1.84343e+06	1.24219e+06	1.25515e+06	1.33012e+06	8.12112e+08	1.89059e+07
16	990	1.42421e+06	1.96818e+06	1.25579e+06	1.29107e+06	1.34125e+06	8.15302e+08	1.8941e+07
17	1290	1.41008e+06	1.68068e+06	1.19896e+06	1.27768e+06	1.33544e+06	8.12289e+08	1.88715e+07
18	1590	1.3818e+06	1.8518e+06	1.18105e+06	1.28119e+06	1.34467e+06	8.1695e+08	1.89433e+07
19	1890	1.4272e+06	1.97066e+06	1.22736e+06	1.40138e+06	1.37674e+06	8.19937e+08	1.89318e+07
20	2190	1.3961e+06	1.89738e+06	1.24586e+06	1.43292e+06	1.39385e+06	8.16308e+08	1.89282e+07
21	2490	1.38448e+06	1.93062e+06	1.27896e+06	1.40968e+06	1.43212e+06	8.23855e+08	1.89896e+07
22	2790	1.40074e+06	1.7982e+06	1.26683e+06	1.45345e+06	1.40164e+06	8.13761e+08	1.89004e+07
23	3090	1.36069e+06	1.77364e+06	1.31395e+06	1.43125e+06	1.42432e+06	8.17328e+08	1.89836e+07
24	3390	1.38212e+06	1.88105e+06	1.28831e+06	1.3965e+06	1.42157e+06	8.11934e+08	1.89459e+07
25	3690	1.35591e+06	1.94544e+06	1.27772e+06	1.35565e+06	1.3826e+06	8.05323e+08	1.89684e+07
26	3990	1.31408e+06	1.95824e+06	1.28374e+06	1.32927e+06	1.38055e+06	8.07698e+08	1.88947e+07
27	4290	1.33875e+06	1.83169e+06	1.26626e+06	1.35352e+06	1.38479e+06	7.96635e+08	1.89583e+07
28	4590	1.38698e+06	1.99954e+06	1.26389e+06	1.37103e+06	1.37776e+06	8.03804e+08	1.89067e+07
		Background corrected Data
	Time_(sec)	Roi1-bkgd-corr	Roi2-bkgd-corr	Roi3-bkgd-corr	Roi4-bkgd-corr	Roi5-bkgd-corr	Ref_fluo-bkgd-corr
1	0	786404	1.40334e+06	615067	636242	577025	2.64447e+08
2	30	780435	1.47454e+06	601379	644842	607469	2.73713e+08
3	60	786642	1.48109e+06	601423	661424	595267	2.73439e+08
4	90	767773	1.467e+06	594177	647501	611888	2.75091e+08
5	120	793221	1.45087e+06	598298	663462	606860	2.7821e+08
6	150	810327	1.48816e+06	600647	703313	631612	2.81409e+08
7	180	802256	1.51534e+06	574640	666951	603345	2.80455e+08
8	210	442784	654274	267674	304460	357240	2.78443e+08
9	240	492985	774852	286427	335952	392529	2.80217e+08
10	270	511475	812893	302246	333969	404888	2.79021e+08
11	300	521009	896507	297419	336008	405780	2.81657e+08
12	330	496075	839619	309996	314049	405701	2.72326e+08
13	360	511130	853292	329099	331384	421237	2.72212e+08
14	390	496971	810509	358723	333017	409084	2.74153e+08
15	690	534353	961516	360282	373243	448215	2.81431e+08
16	990	540662	1.08463e+06	372250	407524	457706	2.83638e+08
17	1290	529775	800375	318658	397375	455134	2.82575e+08
18	1590	498153	968153	297404	397541	461021	2.85221e+08
19	1890	544082	1.08755e+06	344246	518261	493625	2.88531e+08
20	2190	513150	1.01443e+06	362915	549969	510905	2.85001e+08
21	2490	498671	1.04481e+06	393148	523872	546310	2.90825e+08
22	2790	519094	916546	385183	571804	519993	2.83236e+08
23	3090	475152	888109	428413	545716	538787	2.84466e+08
24	3390	498351	997275	404534	512730	537801	2.80131e+08
25	3690	471091	1.06062e+06	392893	470828	497779	2.72888e+08
26	3990	432690	1.07686e+06	402356	447882	499162	2.77331e+08
27	4290	454401	947343	381911	469170	500434	2.64485e+08
28	4590	505033	1.11759e+06	381941	489087	495814	2.731e+08
		Bleaching Corrected Data
	Time_(sec)	Roi1-bkgd_bleach-corr	Roi2-bkgd_bleach-corr	Roi3-bkgd_bleach-corr	Roi4-bkgd_bleach-corr	Roi5-bkgd_bleach-corr
1	0	0.00297376	0.00530667	0.00232586	0.00240593	0.002182
2	30	0.00285129	0.00538719	0.00219712	0.00235591	0.00221937
3	60	0.00287685	0.00541654	0.00219948	0.00241891	0.00217696
4	90	0.00279098	0.00533277	0.00215993	0.00235377	0.00222431
5	120	0.00285116	0.00521503	0.00215053	0.00238475	0.0021813
6	150	0.00287953	0.00528823	0.00213442	0.00249925	0.00224446
7	180	0.00286055	0.00540316	0.00204895	0.0023781	0.00215131
8	210	0.00159021	0.00234976	0.000961325	0.00109344	0.00128299
9	240	0.0017593	0.00276518	0.00102216	0.0011989	0.0014008
10	270	0.00183311	0.00291338	0.00108324	0.00119693	0.0014511
11	300	0.0018498	0.00318297	0.00105596	0.00119297	0.00144068
12	330	0.00182162	0.00308314	0.00113833	0.00115321	0.00148976
13	360	0.00187769	0.00313466	0.00120898	0.00121737	0.00154746
14	390	0.00181275	0.00295641	0.00130848	0.00121471	0.00149217
15	690	0.0018987	0.00341652	0.00128018	0.00132623	0.00159263
16	990	0.00190617	0.003824	0.00131241	0.00143678	0.0016137
17	1290	0.00187482	0.00283244	0.0011277	0.00140627	0.00161067
18	1590	0.00174655	0.0033944	0.00104271	0.0013938	0.00161637
19	1890	0.00188569	0.00376926	0.0011931	0.0017962	0.00171082
20	2190	0.00180052	0.00355938	0.00127338	0.00192971	0.00179264
21	2490	0.00171468	0.00359258	0.00135184	0.00180133	0.00187848
22	2790	0.00183273	0.00323598	0.00135994	0.00201883	0.0018359
23	3090	0.00167033	0.00312202	0.00150603	0.00191839	0.00189403
24	3390	0.00177899	0.00356003	0.00144409	0.00183032	0.00191982
25	3690	0.00172632	0.00388665	0.00143976	0.00172535	0.00182411
26	3990	0.00156019	0.00388292	0.00145081	0.00161497	0.00179987
27	4290	0.00171806	0.00358184	0.00144398	0.0017739	0.00189211
28	4590	0.00184926	0.00409223	0.00139854	0.00179087	0.0018155
		Normalized Data
	Time_(sec)	Roi1_corr_norm	Roi2_corr_norm	Roi3_corr_norm	Roi4_corr_norm	Roi5_corr_norm
1	0	1	1	1	1	1
2	30	0.958817	1.01517	0.944648	0.979209	1.01712
3	60	0.96741	1.0207	0.945663	1.00539	0.997691
4	90	0.938533	1.00492	0.928659	0.97832	1.01939
5	120	0.958771	0.982731	0.924616	0.991198	0.999679
6	150	0.968312	0.996525	0.917693	1.03879	1.02862
7	180	0.961929	1.01818	0.880946	0.988433	0.985932
8	210	0.534748	0.442793	0.413321	0.454476	0.587988
9	240	0.591606	0.521077	0.439478	0.49831	0.64198
10	270	0.616426	0.549003	0.465737	0.497493	0.665033
11	300	0.622039	0.599805	0.454009	0.495844	0.660258
12	330	0.612565	0.580994	0.489422	0.47932	0.68275
13	360	0.631418	0.590701	0.519799	0.505988	0.709191
14	390	0.609581	0.557112	0.562579	0.504882	0.683855
15	690	0.638483	0.643816	0.550411	0.551235	0.729892
16	990	0.640995	0.720603	0.56427	0.597181	0.739549
17	1290	0.630452	0.533751	0.484852	0.584499	0.73816
18	1590	0.58732	0.639647	0.448313	0.579318	0.740771
19	1890	0.63411	0.710288	0.512971	0.746574	0.78406
20	2190	0.605468	0.670737	0.547488	0.802063	0.821557
21	2490	0.576601	0.676993	0.581221	0.748703	0.860897
22	2790	0.616298	0.609795	0.584703	0.839104	0.841382
23	3090	0.561689	0.58832	0.647514	0.797358	0.868024
24	3390	0.59823	0.67086	0.620885	0.760755	0.879843
25	3690	0.580515	0.732408	0.619022	0.717125	0.83598
26	3990	0.524651	0.731706	0.623776	0.671246	0.824872
27	4290	0.577739	0.67497	0.620838	0.737304	0.867144
28	4590	0.621859	0.771148	0.6013	0.744357	0.832035
		Normalize the bouton fluorescent right after bleaching to 0
	Recovery Time_(sec)
1	0	0	0	0	0	0
2	30	0.132205	0.13913	0.0501784	0.0807469	0.12888
3	60	0.189916	0.188761	0.100553	0.0792422	0.183908
4	90	0.202965	0.279049	0.0780551	0.0762046	0.172511
5	120	0.180937	0.245616	0.145989	0.0457646	0.2262
6	150	0.224774	0.262869	0.204262	0.0948895	0.289316
7	180	0.173998	0.203173	0.286329	0.0928526	0.228836
8	480	0.2412	0.357268	0.262987	0.178239	0.338729
9	780	0.247043	0.493736	0.289573	0.262877	0.361779
10	1080	0.222528	0.161654	0.137222	0.239516	0.358465
11	1380	0.122238	0.349857	0.0671276	0.229972	0.364698
12	1680	0.231034	0.475404	0.191163	0.538073	0.468029
13	1980	0.164436	0.405111	0.257379	0.640289	0.557535
14	2280	0.0973164	0.41623	0.32209	0.541996	0.651441
15	2580	0.189618	0.296803	0.32877	0.708524	0.604859
16	2880	0.0626419	0.258637	0.449263	0.631623	0.668452
17	3180	0.147605	0.405331	0.398179	0.564196	0.696665
18	3480	0.106417	0.514717	0.394605	0.483825	0.591964
19	3780	-0.0234762	0.513469	0.403726	0.399312	0.565449
20	4080	0.0999621	0.412635	0.398089	0.520998	0.666351
21	4380	0.202547	0.583567	0.360609	0.53399	0.582545

## Sheet: WT-0206-C1
		Raw Data
	Time_(sec)	Roi1	Roi2	Roi3	Roi4	Roi5	Ref_fluo	Background
1	0	1643000	1632470	1532612	1525996	1717426	535399847	2.47611e+07
2	30	1.63578e+06	1.6286e+06	1.58269e+06	1.54435e+06	1.71719e+06	5.44953e+08	2.47617e+07
3	60	1.61167e+06	1.66447e+06	1.54283e+06	1.58992e+06	1.78053e+06	5.49008e+08	2.48805e+07
4	90	1.61827e+06	1.61697e+06	1.53454e+06	1.58442e+06	1.72958e+06	5.65253e+08	2.48829e+07
5	120	1.68175e+06	1.62503e+06	1.56519e+06	1.5875e+06	1.82744e+06	5.73755e+08	2.50113e+07
6	150	1.62971e+06	1.63131e+06	1.56052e+06	1.57822e+06	1.76157e+06	5.63085e+08	2.49055e+07
7	180	1.63497e+06	1.63504e+06	1.54791e+06	1.60195e+06	1.76483e+06	5.58783e+08	2.48945e+07
8	210	1.2495e+06	1.07045e+06	1.15203e+06	1.15962e+06	1.13708e+06	5.57022e+08	2.48845e+07
9	240	1.27557e+06	1.109e+06	1.16352e+06	1.18295e+06	1.18052e+06	5.57957e+08	2.48977e+07
10	270	1.29999e+06	1.11789e+06	1.2151e+06	1.18061e+06	1.23874e+06	5.56718e+08	2.49123e+07
11	300	1.31204e+06	1.1051e+06	1.20661e+06	1.18987e+06	1.22893e+06	5.55721e+08	2.49042e+07
12	330	1.31345e+06	1.11025e+06	1.18099e+06	1.18034e+06	1.27923e+06	5.51636e+08	2.48119e+07
13	360	1.30831e+06	1.10595e+06	1.28279e+06	1.18354e+06	1.29746e+06	5.53618e+08	2.48214e+07
14	390	1.27327e+06	1.10198e+06	1.29523e+06	1.18546e+06	1.23707e+06	5.44007e+08	2.47779e+07
15	690	1.32042e+06	1.1303e+06	1.35924e+06	1.30282e+06	1.43186e+06	5.56949e+08	2.48691e+07
16	990	1.3229e+06	1.17312e+06	1.33759e+06	1.28017e+06	1.50947e+06	5.59086e+08	2.48627e+07
17	1290	1.35532e+06	1.20536e+06	1.334e+06	1.32813e+06	1.49769e+06	5.52041e+08	2.47528e+07
18	1590	1.42331e+06	1.21473e+06	1.31077e+06	1.32566e+06	1.52932e+06	5.58113e+08	2.48091e+07
19	1890	1.38875e+06	1.22761e+06	1.45275e+06	1.33094e+06	1.54628e+06	5.60098e+08	2.48979e+07
20	2190	1.41672e+06	1.2091e+06	1.37788e+06	1.35383e+06	1.66713e+06	5.62732e+08	2.48703e+07
21	2490	1.41845e+06	1.18412e+06	1.36417e+06	1.35714e+06	1.65882e+06	5.67384e+08	2.49731e+07
22	2790	1.47041e+06	1.19436e+06	1.39228e+06	1.42384e+06	1.73069e+06	5.81584e+08	2.50975e+07
23	3090	1.41548e+06	1.19638e+06	1.42259e+06	1.37888e+06	1.72736e+06	5.64556e+08	2.49405e+07
24	3390	1.46328e+06	1.2089e+06	1.43097e+06	1.48489e+06	1.78676e+06	5.74754e+08	2.5038e+07
25	3690	1.44325e+06	1.21193e+06	1.56958e+06	1.50534e+06	1.76264e+06	5.74104e+08	2.50516e+07
26	3990	1.47971e+06	1.22684e+06	1.43276e+06	1.50975e+06	1.81767e+06	5.7056e+08	2.50414e+07
27	4290	1.51713e+06	1.24676e+06	1.4144e+06	1.48783e+06	1.73199e+06	5.69075e+08	2.49874e+07
28	4590	1.48563e+06	1.22947e+06	1.5298e+06	1.56119e+06	1.72876e+06	5.65793e+08	2.49823e+07
		Background corrected Data
	Time_(sec)	Roi1-bkgd-corr	Roi2-bkgd-corr	Roi3-bkgd-corr	Roi4-bkgd-corr	Roi5-bkgd-corr	Ref_fluo-bkgd-corr
1	0	694233	683703	583845	577229	768659	2.07669e+08
2	30	686988	679813	633900	595564	768407	2.17215e+08
3	60	658328	711134	589489	636578	827187	2.19697e+08
4	90	664833	663532	581109	630985	776142	2.3591e+08
5	120	723392	666675	606831	629146	869085	2.42711e+08
6	150	675411	677005	606221	623923	807271	2.33443e+08
7	180	681097	681163	594031	648070	810953	2.29287e+08
8	210	296009	116961	198541	206130	183584	2.27658e+08
9	240	321572	155002	209515	228954	226520	2.28418e+08
10	270	345427	163330	260537	226046	284175	2.26986e+08
11	300	357786	150853	252358	235616	274681	2.26096e+08
12	330	362738	159536	230275	229626	328512	2.23232e+08
13	360	357235	154871	331714	232468	346382	2.25089e+08
14	390	323860	152568	345822	236051	287661	2.16053e+08
15	690	367512	177394	406337	349913	478957	2.27789e+08
16	990	370237	220456	384926	327509	556805	2.3001e+08
17	1290	406873	256911	385548	379679	549238	2.2442e+08
18	1590	472706	264131	360171	375053	578711	2.29747e+08
19	1890	434748	273608	498748	376938	592274	2.30557e+08
20	2190	463771	256149	424935	400878	714179	2.33556e+08
21	2490	461562	227229	407282	400254	701933	2.36846e+08
22	2790	508755	232703	430622	462186	769031	2.494e+08
23	3090	459837	240744	466956	423236	771721	2.34451e+08
24	3390	503904	249527	471596	525518	827388	2.43358e+08
25	3690	483354	252029	609680	545448	802739	2.42528e+08
26	3990	520205	267335	473255	550240	858166	2.39119e+08
27	4290	559698	289322	456966	530390	774556	2.3835e+08
28	4590	528388	272227	572562	603953	771521	2.35134e+08
		Bleaching Corrected Data
	Time_(sec)	Roi1-bkgd_bleach-corr	Roi2-bkgd_bleach-corr	Roi3-bkgd_bleach-corr	Roi4-bkgd_bleach-corr	Roi5-bkgd_bleach-corr
1	0	0.00334299	0.00329228	0.00281143	0.00277957	0.00370137
2	30	0.00316272	0.00312968	0.00291831	0.00274183	0.00353755
3	60	0.00299652	0.00323688	0.00268319	0.00289753	0.00376512
4	90	0.00281816	0.00281265	0.00246327	0.00267469	0.00328999
5	120	0.00298046	0.00274678	0.00250022	0.00259216	0.00358073
6	150	0.00289326	0.00290009	0.00259687	0.0026727	0.00345811
7	180	0.0029705	0.00297079	0.00259077	0.00282646	0.00353684
8	210	0.00130023	0.000513759	0.000872103	0.000905438	0.0008064
9	240	0.00140782	0.000678592	0.000917243	0.00100235	0.000991691
10	270	0.0015218	0.000719558	0.00114781	0.000995857	0.00125195
11	300	0.00158245	0.000667209	0.00111615	0.00104211	0.00121489
12	330	0.00162494	0.000714666	0.00103155	0.00102864	0.00147162
13	360	0.00158708	0.000688043	0.0014737	0.00103278	0.00153886
14	390	0.00149898	0.000706157	0.00160063	0.00109256	0.00133143
15	690	0.00161339	0.000778765	0.00178383	0.00153613	0.00210264
16	990	0.00160966	0.000958463	0.00167352	0.00142389	0.00242079
17	1290	0.001813	0.00114478	0.00171798	0.00169182	0.00244737
18	1590	0.00205751	0.00114966	0.00156768	0.00163246	0.00251891
19	1890	0.00188564	0.00118673	0.00216323	0.0016349	0.00256888
20	2190	0.0019857	0.00109673	0.00181942	0.00171641	0.00305785
21	2490	0.00194878	0.000959394	0.00171961	0.00168993	0.00296366
22	2790	0.00203991	0.000933051	0.00172663	0.00185319	0.00308352
23	3090	0.00196134	0.00102684	0.0019917	0.00180522	0.00329161
24	3390	0.00207062	0.00102535	0.00193787	0.00215944	0.00339988
25	3690	0.00199298	0.00103918	0.00251385	0.00224901	0.00330988
26	3990	0.00217551	0.001118	0.00197916	0.00230112	0.00358887
27	4290	0.00234822	0.00121386	0.00191721	0.00222526	0.00324966
28	4590	0.00224718	0.00115775	0.00243504	0.00256855	0.00328119
		Normalized Data
	Time_(sec)	Roi1_corr_norm	Roi2_corr_norm	Roi3_corr_norm	Roi4_corr_norm	Roi5_corr_norm
1	0	1	1	1	1	1
2	30	0.946076	0.950613	1.03802	0.986422	0.95574
3	60	0.896362	0.983173	0.954388	1.04244	1.01722
4	90	0.843008	0.854317	0.876162	0.962267	0.888858
5	120	0.891557	0.83431	0.889305	0.932575	0.967407
6	150	0.865473	0.880877	0.923686	0.961553	0.934278
7	180	0.888576	0.902349	0.921516	1.01687	0.955549
8	210	0.388944	0.15605	0.310199	0.325748	0.217865
9	240	0.421127	0.206116	0.326256	0.360612	0.267925
10	270	0.455221	0.218559	0.408266	0.358278	0.338239
11	300	0.473365	0.202659	0.397005	0.374916	0.328226
12	330	0.486074	0.217073	0.366914	0.370073	0.397587
13	360	0.47475	0.208987	0.524182	0.371562	0.415755
14	390	0.448396	0.214489	0.569331	0.393067	0.359714
15	690	0.482619	0.236543	0.634493	0.55265	0.568069
16	990	0.481504	0.291124	0.595257	0.512271	0.654025
17	1290	0.54233	0.347716	0.61107	0.608664	0.661205
18	1590	0.61547	0.349198	0.557612	0.587306	0.680533
19	1890	0.564059	0.360458	0.769441	0.588185	0.694035
20	2190	0.59399	0.333123	0.647151	0.617511	0.82614
21	2490	0.582947	0.291407	0.611649	0.607983	0.800693
22	2790	0.610208	0.283406	0.614148	0.666718	0.833076
23	3090	0.586703	0.311895	0.708431	0.649463	0.889295
24	3390	0.619394	0.31144	0.689283	0.776898	0.918544
25	3690	0.596169	0.31564	0.894156	0.809123	0.894231
26	3990	0.650769	0.339583	0.703971	0.82787	0.969606
27	4290	0.702432	0.368698	0.681934	0.800578	0.877961
28	4590	0.672207	0.351657	0.866124	0.924081	0.88648
		Normalize the bouton fluorescent right after bleaching to 0
	Recovery Time_(sec)
1	0	0	0	0	0	0
2	30	0.0624323	0.0659601	0.0253614	0.0528032	0.0674663
3	60	0.12857	0.0823533	0.1549	0.0492676	0.16223
4	90	0.163767	0.0614052	0.137113	0.0744676	0.148734
5	120	0.188422	0.0803959	0.0895834	0.0671321	0.242212
6	150	0.166454	0.0697423	0.337993	0.0693875	0.266698
7	180	0.115331	0.0769907	0.409307	0.101957	0.19117
8	480	0.18172	0.106046	0.512234	0.34365	0.471973
9	780	0.179556	0.177954	0.450259	0.282495	0.587817
10	1080	0.297553	0.252511	0.475237	0.428486	0.597494
11	1380	0.439437	0.254464	0.390797	0.396139	0.623541
12	1680	0.339704	0.269298	0.725389	0.39747	0.641739
13	1980	0.397767	0.233286	0.532227	0.441885	0.819777
14	2280	0.376345	0.178327	0.476151	0.427454	0.785482
15	2580	0.429228	0.167786	0.480098	0.516411	0.829125
16	2880	0.383631	0.205318	0.629021	0.490277	0.904892
17	3180	0.447048	0.204719	0.598776	0.683281	0.944312
18	3480	0.401995	0.210253	0.922381	0.732087	0.911544
19	3780	0.507913	0.241796	0.621977	0.760479	1.01313
20	4080	0.608134	0.280153	0.587169	0.719146	0.889617
21	4380	0.5495	0.257703	0.878103	0.906196	0.901098

## Sheet: P554A-1127-C4
		Raw Data
	Time_(sec)	Roi1	Roi2	Roi3	Roi4	Roi5	Ref_fluo	Background
1	0	1893330	3477723	3405416	2442000	2890070	772557885	26177472
2	30	1.89399e+06	3.44697e+06	3.36795e+06	2.37763e+06	2.80159e+06	7.69519e+08	2.60843e+07			Filter out due to large abrupt change.
3	60	1.86456e+06	3.40279e+06	3.31992e+06	2.34616e+06	2.79516e+06	7.69871e+08	2.62014e+07
4	90	1.8984e+06	3.36644e+06	3.34613e+06	2.38048e+06	2.82293e+06	7.67768e+08	2.60322e+07
5	120	1.89274e+06	3.32759e+06	3.40119e+06	2.33904e+06	2.7986e+06	7.66627e+08	2.60297e+07
6	150	1.92289e+06	3.48645e+06	3.4554e+06	2.3153e+06	2.87279e+06	7.70579e+08	2.60479e+07
7	180	1.87669e+06	3.38873e+06	3.43721e+06	2.2803e+06	2.78389e+06	7.69555e+08	2.61279e+07
8	210	1.57587e+06	2.23027e+06	2.01753e+06	1.96494e+06	2.05528e+06	7.65769e+08	2.60516e+07
9	240	1.60453e+06	2.25525e+06	2.16064e+06	1.97126e+06	2.14371e+06	7.65072e+08	2.61172e+07
10	270	1.61438e+06	2.36853e+06	2.27045e+06	2.03856e+06	2.19521e+06	7.66948e+08	2.60938e+07
11	300	1.63516e+06	2.45582e+06	2.37417e+06	2.03286e+06	2.19122e+06	7.65273e+08	2.61406e+07
12	330	2.07168e+06	2.48814e+06	2.39384e+06	2.04455e+06	2.22677e+06	7.61231e+08	2.60894e+07
13	360	2.04188e+06	2.38974e+06	2.45262e+06	2.03568e+06	2.21294e+06	7.56377e+08	2.59528e+07
14	390	1.89163e+06	2.36104e+06	2.42633e+06	2.03072e+06	2.25076e+06	7.56559e+08	2.60337e+07
15	690	1.5837e+06	2.63591e+06	2.86993e+06	2.19757e+06	2.26015e+06	7.66364e+08	2.61148e+07
16	990	1.63537e+06	2.59607e+06	3.23384e+06	2.04466e+06	2.33704e+06	7.60143e+08	2.594e+07
17	1290	1.66161e+06	2.53264e+06	3.19546e+06	2.0306e+06	2.33432e+06	7.59075e+08	2.5888e+07
18	1590	1.73404e+06	2.54032e+06	3.42333e+06	2.10695e+06	2.47305e+06	7.63529e+08	2.59665e+07
19	1890	1.62719e+06	2.62413e+06	3.28425e+06	2.14143e+06	2.56217e+06	7.58422e+08	2.58907e+07
20	2190	1.71377e+06	2.5604e+06	3.54373e+06	2.30893e+06	2.66376e+06	7.62451e+08	2.59848e+07
21	2490	1.61336e+06	2.53499e+06	3.65704e+06	2.29794e+06	2.76893e+06	7.56851e+08	2.58786e+07
22	2790	1.59749e+06	2.55531e+06	4.08325e+06	2.22404e+06	2.76836e+06	7.57598e+08	2.58614e+07
23	3090	1.571e+06	2.52616e+06	3.80174e+06	2.25932e+06	2.76852e+06	7.62262e+08	2.59749e+07
24	3390	1.6003e+06	2.53425e+06	3.53004e+06	2.2868e+06	2.60906e+06	7.58596e+08	2.58911e+07
25	3690	1.62681e+06	2.69486e+06	3.54372e+06	2.26082e+06	2.48787e+06	7.59559e+08	2.59396e+07
26	3990	1.63255e+06	3.02001e+06	3.8096e+06	2.48872e+06	2.85292e+06	8.25843e+08	2.65399e+07
27	4290	1.61492e+06	2.78295e+06	3.5694e+06	2.33383e+06	2.66692e+06	7.6104e+08	2.585e+07
28	4590	1.57523e+06	2.71842e+06	3.6518e+06	2.36233e+06	2.57508e+06	7.6003e+08	2.58229e+07
		Background corrected Data
	Time_(sec)	Roi1-bkgd-corr	Roi2-bkgd-corr	Roi3-bkgd-corr	Roi4-bkgd-corr	Roi5-bkgd-corr	Ref_fluo-bkgd-corr
1	0	463468	2.04786e+06	1.97555e+06	1.01214e+06	1.46021e+06	2.72106e+08
2	30	469219	2.02219e+06	1.94317e+06	952858	1.37682e+06	2.70848e+08
3	60	433391	1.97162e+06	1.88875e+06	914990	1.36399e+06	2.68962e+08
4	90	476476	1.94452e+06	1.9242e+06	958556	1.40101e+06	2.70095e+08
5	120	470954	1.9058e+06	1.9794e+06	917251	1.37681e+06	2.69001e+08
6	150	500103	2.06367e+06	2.03262e+06	892508	1.45001e+06	2.72604e+08
7	180	449534	1.96158e+06	2.01006e+06	853152	1.35674e+06	2.70052e+08
8	210	152878	807285	594541	541956	632287	2.67723e+08
9	240	177958	828684	734076	544690	717139	2.65773e+08
10	270	189093	943239	845155	613267	769922	2.68097e+08
11	300	207311	1.02797e+06	946316	605014	763369	2.65526e+08
12	330	646631	1.06309e+06	968790	619502	801724	2.62464e+08
13	360	624290	972153	1.03503e+06	618093	795345	2.6022e+08
14	390	469623	939032	1.00432e+06	608706	828752	2.58855e+08
15	690	157256	1.20947e+06	1.44349e+06	771133	833715	2.6711e+08
16	990	218478	1.17918e+06	1.81695e+06	627772	920150	2.64231e+08
17	1290	247559	1.11859e+06	1.78141e+06	616551	920266	2.64157e+08
18	1590	315700	1.12199e+06	2.005e+06	688613	1.05472e+06	2.67112e+08
19	1890	212994	1.20994e+06	1.87005e+06	727234	1.14798e+06	2.63453e+08
20	2190	294433	1.14106e+06	2.12439e+06	889590	1.24442e+06	2.65683e+08
21	2490	199818	1.12145e+06	2.2435e+06	884403	1.35539e+06	2.62112e+08
22	2790	184894	1.14272e+06	2.67066e+06	811439	1.35576e+06	2.63189e+08
23	3090	152200	1.10736e+06	2.38294e+06	840520	1.34972e+06	2.65682e+08
24	3390	186083	1.12003e+06	2.11582e+06	872582	1.19484e+06	2.63619e+08
25	3690	209939	1.278e+06	2.12685e+06	843953	1.071e+06	2.63656e+08
26	3990	182890	1.57035e+06	2.35994e+06	1.03906e+06	1.40326e+06	3.18463e+08
27	4290	202948	1.37098e+06	2.15742e+06	921856	1.25494e+06	2.66848e+08
28	4590	164732	1.30792e+06	2.2413e+06	951835	1.16458e+06	2.66356e+08
		Bleaching Corrected Data
	Time_(sec)	Roi1-bkgd_bleach-corr	Roi2-bkgd_bleach-corr	Roi3-bkgd_bleach-corr	Roi4-bkgd_bleach-corr	Roi5-bkgd_bleach-corr
1	0	0.00170326	0.00752596	0.00726023	0.00371964	0.00536632
2	30	0.0017324	0.00746615	0.0071744	0.00351805	0.00508336
3	60	0.00161134	0.00733047	0.00702237	0.00340193	0.0050713
4	90	0.00176411	0.00719939	0.00712417	0.00354896	0.0051871
5	120	0.00175075	0.00708475	0.00735835	0.00340985	0.00511823
6	150	0.00183454	0.0075702	0.0074563	0.00327401	0.0053191
7	180	0.00166462	0.00726369	0.00744321	0.00315921	0.00502397
8	210	0.000571029	0.00301537	0.00222073	0.00202431	0.00236172
9	240	0.000669587	0.00311801	0.00276204	0.00204945	0.00269831
10	270	0.000705315	0.00351828	0.00315243	0.00228748	0.00287181
11	300	0.000780757	0.00387146	0.00356393	0.00227855	0.00287493
12	330	0.00246369	0.00405042	0.00369114	0.00236033	0.00305461
13	360	0.00239908	0.00373588	0.00397753	0.00237527	0.00305643
14	390	0.00181423	0.00362764	0.00387985	0.00235153	0.00320161
15	690	0.000588728	0.00452799	0.00540408	0.00288694	0.00312124
16	990	0.000826846	0.00446269	0.00687639	0.00237585	0.00348237
17	1290	0.000937163	0.00423457	0.00674373	0.00233403	0.00348378
18	1590	0.0011819	0.00420044	0.00750621	0.002578	0.0039486
19	1890	0.000808469	0.0045926	0.00709824	0.00276039	0.00435742
20	2190	0.00110821	0.00429483	0.00799596	0.00334832	0.00468385
21	2490	0.000762339	0.0042785	0.00855931	0.00337414	0.00517102
22	2790	0.000702513	0.00434181	0.0101473	0.0030831	0.0051513
23	3090	0.000572864	0.004168	0.00896914	0.00316363	0.00508021
24	3390	0.000705876	0.00424867	0.00802604	0.00331001	0.00453246
25	3690	0.000796261	0.00484722	0.00806677	0.00320096	0.00406212
26	3990	0.000574291	0.00493103	0.00741041	0.00326273	0.00440636
27	4290	0.000760537	0.00513767	0.00808483	0.00345461	0.00470282
28	4590	0.000618466	0.00491042	0.00841466	0.00357354	0.00437227
		Normalized Data
	Time_(sec)	Roi1_corr_norm	Roi2_corr_norm	Roi3_corr_norm	Roi4_corr_norm	Roi5_corr_norm
1	0	1	1	1	1	1
2	30	1.01711	0.992052	0.988178	0.945803	0.947272
3	60	0.946034	0.974025	0.967237	0.914584	0.945025
4	90	1.03572	0.956607	0.98126	0.954114	0.966603
5	120	1.02788	0.941375	1.01351	0.916713	0.95377
6	150	1.07708	1.00588	1.02701	0.880195	0.991202
7	180	0.977312	0.965151	1.0252	0.849331	0.936205
8	210	0.335256	0.400662	0.305876	0.544222	0.4401
9	240	0.39312	0.414301	0.380434	0.550981	0.502824
10	270	0.414097	0.467485	0.434205	0.614974	0.535154
11	300	0.45839	0.514414	0.490884	0.612573	0.535737
12	330	1.44646	0.538193	0.508405	0.634558	0.569218
13	360	1.40852	0.4964	0.547851	0.638575	0.569559
14	390	1.06515	0.482016	0.534398	0.632193	0.596611
15	690	0.345648	0.601649	0.74434	0.776135	0.581635
16	990	0.485449	0.592973	0.947131	0.638731	0.648932
17	1290	0.550217	0.562661	0.928858	0.627487	0.649194
18	1590	0.693906	0.558126	1.03388	0.693076	0.735812
19	1890	0.474659	0.610235	0.977688	0.742111	0.811994
20	2190	0.650642	0.570669	1.10134	0.900171	0.872825
21	2490	0.447576	0.568499	1.17893	0.907113	0.963607
22	2790	0.412451	0.57691	1.39765	0.828871	0.959932
23	3090	0.336333	0.553816	1.23538	0.850519	0.946684
24	3390	0.414426	0.564535	1.10548	0.889872	0.844613
25	3690	0.467492	0.644066	1.11109	0.860557	0.756966
26	3990	0.337171	0.655203	1.02069	0.877161	0.821115
27	4290	0.446518	0.682659	1.11358	0.928748	0.87636
28	4590	0.363107	0.652464	1.15901	0.960721	0.814761
		Normalize the bouton fluorescent right after bleaching to 0
	Recovery Time_(sec)
1	0	0	0	0	0	0
2	30	0.0855557	0.0236872	0.10736	0.0178448	0.119984
3	60	0.11657	0.116057	0.184787	0.186806	0.181828
4	90	0.18206	0.197561	0.266403	0.180467	0.182943
5	120	1.64297	0.238861	0.291632	0.238517	0.246989
6	150	1.58689	0.166275	0.348433	0.249121	0.247641
7	180	1.07919	0.141294	0.329061	0.23227	0.299389
8	480	0.0153645	0.34907	0.631367	0.612324	0.270741
9	780	0.222068	0.334	0.923377	0.249533	0.399473
10	1080	0.317832	0.281356	0.897066	0.219845	0.399974
11	1380	0.530284	0.27348	1.04829	0.393022	0.565665
12	1680	0.206116	0.36398	0.967378	0.522492	0.711395
13	1980	0.466316	0.295263	1.14543	0.939822	0.827756
14	2280	0.166071	0.291496	1.25716	0.958151	1.00141
15	2580	0.114138	0.306104	1.57211	0.751566	0.994382
16	2880	0.00159291	0.265994	1.33844	0.808723	0.969042
17	3180	0.117057	0.28461	1.15139	0.91263	0.773791
18	3480	0.195518	0.422739	1.15947	0.835227	0.606131
19	3780	0.00283136	0.44208	1.02929	0.879067	0.728841
20	4080	0.164507	0.489766	1.16305	1.01528	0.834519
21	4380	0.0411791	0.437324	1.22847	1.09969	0.716687

## Sheet: P554A-1129-C3
		Raw Data
	Time_(sec)	Roi1	Roi2	Roi3	Roi4	Roi5	Ref_fluo	Background
1	0	1545953	2091018	1512559	1856852	2102880	632305518	31146236			Filter out due to wrong targeting.
2	30	1.55509e+06	2.00814e+06	1.48452e+06	1.8219e+06	2.02236e+06	6.32247e+08	3.11088e+07
3	60	1.5662e+06	2.0591e+06	1.46605e+06	1.82415e+06	2.15207e+06	6.35286e+08	3.11665e+07
4	90	1.57626e+06	2.0302e+06	1.47368e+06	1.79376e+06	1.99e+06	6.32625e+08	3.10929e+07
5	120	1.56886e+06	1.9893e+06	1.4482e+06	1.79965e+06	2.12709e+06	6.33804e+08	3.1091e+07
6	150	1.64005e+06	1.97619e+06	1.49249e+06	1.75324e+06	2.07233e+06	6.32964e+08	3.11024e+07
7	180	1.59926e+06	2.00962e+06	1.47372e+06	1.76606e+06	2.0161e+06	6.2886e+08	3.11198e+07
8	210	1.12002e+06	1.23444e+06	1.09355e+06	1.15787e+06	1.66094e+06	6.26693e+08	3.10778e+07
9	240	1.14994e+06	1.31237e+06	1.12774e+06	1.22033e+06	1.65491e+06	6.29886e+08	3.11347e+07
10	270	1.1289e+06	1.30347e+06	1.12535e+06	1.23035e+06	1.68325e+06	6.27163e+08	3.11018e+07
11	300	1.14803e+06	1.34055e+06	1.13574e+06	1.23186e+06	1.75724e+06	6.24173e+08	3.11025e+07
12	330	1.15588e+06	1.32436e+06	1.1175e+06	1.23468e+06	1.61251e+06	6.22865e+08	3.10901e+07
13	360	1.14333e+06	1.35656e+06	1.1231e+06	1.26243e+06	1.73367e+06	6.2354e+08	3.11061e+07
14	390	1.13997e+06	1.36267e+06	1.12096e+06	1.28198e+06	1.6928e+06	6.22835e+08	3.10544e+07
15	690	1.1375e+06	1.42142e+06	1.24227e+06	1.31768e+06	1.6703e+06	6.29913e+08	3.11663e+07
16	990	1.22879e+06	1.58263e+06	1.33453e+06	1.35965e+06	1.6008e+06	6.30689e+08	3.11333e+07
17	1290	1.23517e+06	1.65144e+06	1.3567e+06	1.44432e+06	1.6074e+06	6.27034e+08	3.10222e+07
18	1590	1.2026e+06	1.75308e+06	1.38606e+06	1.39945e+06	1.77967e+06	6.25572e+08	3.10833e+07
19	1890	1.24193e+06	1.76742e+06	1.45159e+06	1.43975e+06	1.71779e+06	6.28125e+08	3.10347e+07
20	2190	1.27612e+06	1.81852e+06	1.4133e+06	1.49315e+06	1.67065e+06	6.26653e+08	3.10499e+07
21	2490	1.29048e+06	1.78766e+06	1.42296e+06	1.49767e+06	1.65518e+06	6.33429e+08	3.11301e+07
22	2790	1.28777e+06	1.8874e+06	1.46483e+06	1.56111e+06	1.61361e+06	6.32532e+08	3.10972e+07
23	3090	1.3151e+06	1.79828e+06	1.48466e+06	1.54085e+06	1.53405e+06	6.31116e+08	3.11332e+07
24	3390	1.31979e+06	1.82969e+06	1.43811e+06	1.5723e+06	1.63596e+06	6.31077e+08	3.1149e+07
25	3690	1.26952e+06	1.89575e+06	1.52555e+06	1.59839e+06	1.63064e+06	6.32101e+08	3.11191e+07
26	3990	1.26887e+06	1.87691e+06	1.63952e+06	1.59595e+06	1.72043e+06	6.2902e+08	3.11832e+07
27	4290	1.31342e+06	1.86021e+06	1.58081e+06	1.65235e+06	1.72306e+06	6.30712e+08	3.11725e+07
28	4590	1.32462e+06	1.86975e+06	1.41634e+06	1.61504e+06	1.73037e+06	6.30272e+08	3.11316e+07
		Background corrected Data
	Time_(sec)	Roi1-bkgd-corr	Roi2-bkgd-corr	Roi3-bkgd-corr	Roi4-bkgd-corr	Roi5-bkgd-corr	Ref_fluo-bkgd-corr
1	0	660353	1.20542e+06	626959	971252	1.21728e+06	1.87639e+08
2	30	670552	1.1236e+06	599985	937361	1.13783e+06	1.88115e+08
3	60	680026	1.17293e+06	579873	937972	1.2659e+06	1.90331e+08
4	90	692173	1.14611e+06	589597	909675	1.10592e+06	1.88721e+08
5	120	684832	1.10527e+06	564170	915624	1.24306e+06	1.89927e+08
6	150	755700	1.09183e+06	608133	868882	1.18798e+06	1.88924e+08
7	180	714410	1.12477e+06	588874	881209	1.13126e+06	1.84571e+08
8	210	236364	350788	209900	274218	777289	1.83004e+08
9	240	264671	427103	242469	335057	769640	1.85385e+08
10	270	244564	419133	241016	346018	798918	1.83132e+08
11	300	263675	456191	251387	347508	872889	1.80132e+08
12	330	271872	440358	233496	350674	728510	1.79e+08
13	360	258871	472100	238637	377970	849213	1.79447e+08
14	390	256981	479687	237973	398994	809815	1.79481e+08
15	690	251328	535253	356103	431505	784128	1.84961e+08
16	990	343560	697396	449299	474414	715563	1.86207e+08
17	1290	353092	769367	474628	562249	725327	1.84138e+08
18	1590	318790	869264	502250	515639	895861	1.81804e+08
19	1890	359502	884990	569159	557325	835365	1.85052e+08
20	2190	393258	935654	530438	610292	787786	1.83362e+08
21	2490	405341	902516	537816	612524	770043	1.88994e+08
22	2790	403558	1.0032e+06	580621	676904	729401	1.88565e+08
23	3090	429872	913054	599436	655622	648823	1.86636e+08
24	3390	434114	944010	552435	686627	750282	1.86372e+08
25	3690	384691	1.01093e+06	640728	713563	745817	1.87823e+08
26	3990	382218	990257	752871	709297	833780	1.83826e+08
27	4290	427074	973862	694460	766000	836715	1.85671e+08
28	4590	439436	984568	531157	729859	845183	1.85814e+08
		Bleaching Corrected Data
	Time_(sec)	Roi1-bkgd_bleach-corr	Roi2-bkgd_bleach-corr	Roi3-bkgd_bleach-corr	Roi4-bkgd_bleach-corr	Roi5-bkgd_bleach-corr
1	0	0.00351927	0.00642412	0.0033413	0.00517616	0.00648734
2	30	0.00356458	0.00597295	0.00318945	0.00498291	0.00604857
3	60	0.00357286	0.00616256	0.00304666	0.00492811	0.00665103
4	90	0.00366772	0.00607308	0.00312418	0.00482022	0.00586007
5	120	0.00360577	0.00581943	0.00297046	0.00482094	0.00654496
6	150	0.00400003	0.00577923	0.00321894	0.00459912	0.00628814
7	180	0.00387064	0.00609397	0.0031905	0.00477436	0.0061291
8	210	0.00129158	0.00191683	0.00114697	0.00149843	0.00424739
9	240	0.00142768	0.00230387	0.00130792	0.00180736	0.00415158
10	270	0.00133545	0.00228869	0.00131608	0.00188945	0.00436252
11	300	0.00146379	0.00253253	0.00139557	0.00192918	0.00484582
12	330	0.00151884	0.00246009	0.00130444	0.00195907	0.00406988
13	360	0.00144261	0.00263087	0.00132985	0.00210631	0.0047324
14	390	0.0014318	0.00267264	0.0013259	0.00222304	0.00451199
15	690	0.00135882	0.00289388	0.00192529	0.00233295	0.00423943
16	990	0.00184504	0.00374526	0.0024129	0.00254777	0.00384283
17	1290	0.00191754	0.0041782	0.00257756	0.0030534	0.00393903
18	1590	0.00175348	0.00478132	0.00276259	0.00283623	0.00492762
19	1890	0.00194271	0.00478239	0.00307568	0.00301172	0.00451422
20	2190	0.00214471	0.00510277	0.00289284	0.00332835	0.00429634
21	2490	0.00214473	0.00477537	0.00284568	0.00324098	0.00407444
22	2790	0.00214015	0.00532017	0.00307916	0.00358977	0.00386817
23	3090	0.00230327	0.00489217	0.00321179	0.00351284	0.00347641
24	3390	0.00232929	0.00506519	0.00296415	0.00368418	0.00402572
25	3690	0.00204815	0.00538233	0.00341133	0.00379912	0.00397084
26	3990	0.00207924	0.00538693	0.00409557	0.00385853	0.00453571
27	4290	0.00230017	0.00524511	0.00374028	0.00412559	0.00450645
28	4590	0.00236492	0.00529867	0.00285853	0.0039279	0.00454854
		Normalized Data
	Time_(sec)	Roi1_corr_norm	Roi2_corr_norm	Roi3_corr_norm	Roi4_corr_norm	Roi5_corr_norm
1	0	1	1	1	1	1
2	30	1.01288	0.92977	0.954556	0.962665	0.932365
3	60	1.01523	0.959285	0.911819	0.952079	1.02523
4	90	1.04218	0.945356	0.93502	0.931235	0.903309
5	120	1.02458	0.905872	0.889015	0.931373	1.00888
6	150	1.13661	0.899615	0.963379	0.888519	0.969294
7	180	1.09984	0.948609	0.954868	0.922374	0.944779
8	210	0.367001	0.29838	0.343271	0.289486	0.65472
9	240	0.405676	0.358629	0.391442	0.34917	0.639952
10	270	0.379468	0.356265	0.393882	0.365028	0.672467
11	300	0.415935	0.394223	0.417672	0.372705	0.746967
12	330	0.431578	0.382947	0.390401	0.37848	0.627358
13	360	0.409917	0.409529	0.398004	0.406924	0.729483
14	390	0.406847	0.416032	0.396821	0.429478	0.695507
15	690	0.386109	0.45047	0.576211	0.450711	0.653493
16	990	0.524269	0.583	0.722144	0.492213	0.592359
17	1290	0.544868	0.650393	0.771425	0.589898	0.607188
18	1590	0.498252	0.744277	0.826802	0.547941	0.759575
19	1890	0.552022	0.744443	0.920504	0.581845	0.695852
20	2190	0.609419	0.794314	0.865785	0.643014	0.662266
21	2490	0.609426	0.74335	0.851669	0.626135	0.62806
22	2790	0.608126	0.828155	0.921546	0.693519	0.596265
23	3090	0.654474	0.761531	0.961241	0.678657	0.535877
24	3390	0.661867	0.788465	0.887126	0.711759	0.620551
25	3690	0.581983	0.837832	1.02096	0.733965	0.612091
26	3990	0.590816	0.838548	1.22574	0.745442	0.699163
27	4290	0.653594	0.816471	1.11941	0.797036	0.694653
28	4590	0.671993	0.824808	0.855516	0.758843	0.701141
		Normalize the bouton fluorescent right after bleaching to 0
	Recovery Time_(sec)
1	0	0	0	0	0	0
2	30	0.0568472	0.0937232	0.0801744	0.0915832	-0.0469725
3	60	0.0183247	0.0900467	0.0842363	0.115917	0.0564479
4	90	0.0719263	0.149094	0.123832	0.127696	0.293403
5	120	0.0949199	0.131552	0.078442	0.136557	-0.0870266
6	150	0.0630803	0.172905	0.0910968	0.180205	0.237794
7	180	0.0585684	0.183021	0.0891277	0.214812	0.129729
8	480	0.0280857	0.236593	0.387701	0.247395	-0.00390176
9	780	0.231164	0.442758	0.63059	0.311078	-0.198348
10	1080	0.261442	0.547595	0.712613	0.460972	-0.15118
11	1380	0.192922	0.693641	0.804781	0.396591	0.333504
12	1680	0.271956	0.6939	0.960738	0.448616	0.130825
13	1980	0.356324	0.771479	0.869663	0.542478	0.0240016
14	2280	0.356334	0.692199	0.84617	0.516577	-0.0847954
15	2580	0.354422	0.824123	0.962472	0.619976	-0.185922
16	2880	0.422548	0.720482	1.02854	0.59717	-0.377996
17	3180	0.433416	0.76238	0.905184	0.647964	-0.108678
18	3480	0.315996	0.839176	1.12794	0.682038	-0.135586
19	3780	0.328979	0.84029	1.46877	0.699649	0.141357
20	4080	0.421255	0.805947	1.29179	0.778819	0.127013
21	4380	0.448299	0.818916	0.852573	0.720214	0.147647

## Sheet: P554A-1130-C3
		Raw Data
	Time_(sec)	Roi1	Roi2	Roi3	Roi4	Roi5	Ref_fluo	Background
1	0	2196994	1737062	2225582	1424359	2057087	366259811	34526458
2	30	2.13465e+06	1.77454e+06	2.23005e+06	1.40293e+06	1.99917e+06	3.64875e+08	3.44883e+07			Filter out due to large abrupt change.
3	60	2.14803e+06	1.78058e+06	2.26955e+06	1.42718e+06	2.03429e+06	3.65751e+08	3.44877e+07
4	90	2.26283e+06	1.82561e+06	2.23495e+06	1.41843e+06	2.01134e+06	3.66766e+08	3.45738e+07
5	120	2.23612e+06	1.74808e+06	2.24862e+06	1.47283e+06	1.98844e+06	3.65482e+08	3.45047e+07
6	150	2.17888e+06	1.86392e+06	2.26298e+06	1.46947e+06	1.98801e+06	3.66222e+08	3.4568e+07
7	180	2.28251e+06	1.842e+06	2.27022e+06	1.48336e+06	1.94577e+06	3.65623e+08	3.45393e+07
8	210	1.69481e+06	1.09877e+06	1.18767e+06	1.02319e+06	1.25158e+06	3.64143e+08	3.44943e+07
9	240	1.72732e+06	1.14222e+06	1.28195e+06	1.08523e+06	1.29222e+06	3.6496e+08	3.45305e+07
10	270	1.75139e+06	1.15769e+06	1.31013e+06	1.11205e+06	1.30514e+06	3.64538e+08	3.45425e+07
11	300	1.72482e+06	1.16832e+06	1.35663e+06	1.08228e+06	1.31993e+06	3.63017e+08	3.44341e+07
12	330	1.73541e+06	1.1933e+06	1.38141e+06	1.08242e+06	1.33314e+06	3.62346e+08	3.44484e+07
13	360	1.78782e+06	1.22352e+06	1.34769e+06	1.07563e+06	1.3219e+06	3.62349e+08	3.44819e+07
14	390	1.77356e+06	1.23474e+06	1.35535e+06	1.09501e+06	1.32229e+06	3.62743e+08	3.45342e+07
15	690	1.86442e+06	1.33745e+06	1.62324e+06	1.17794e+06	1.45861e+06	3.63158e+08	3.45123e+07
16	990	1.95201e+06	1.30167e+06	1.56624e+06	1.20938e+06	1.5764e+06	3.64477e+08	3.45169e+07
17	1290	2.06047e+06	1.33209e+06	1.75313e+06	1.15291e+06	1.52851e+06	3.63769e+08	3.44457e+07
18	1590	1.96786e+06	1.32713e+06	1.78767e+06	1.19098e+06	1.53147e+06	3.63525e+08	3.44725e+07
19	1890	1.81081e+06	1.45042e+06	1.74998e+06	1.22651e+06	1.44107e+06	3.62465e+08	3.43777e+07
20	2190	1.82165e+06	1.58661e+06	1.70683e+06	1.22873e+06	1.48097e+06	3.6123e+08	3.4384e+07
21	2490	1.79321e+06	1.56944e+06	1.7132e+06	1.29722e+06	1.4457e+06	3.62381e+08	3.43947e+07
22	2790	1.83205e+06	1.5726e+06	1.76444e+06	1.31644e+06	1.4319e+06	3.62479e+08	3.43947e+07
23	3090	1.84579e+06	1.49545e+06	1.7696e+06	1.2669e+06	1.61722e+06	3.62763e+08	3.44114e+07
24	3390	1.85158e+06	1.44603e+06	1.73398e+06	1.29453e+06	1.48299e+06	3.62587e+08	3.43909e+07
25	3690	1.86489e+06	1.4483e+06	1.73573e+06	1.23804e+06	1.38249e+06	3.61323e+08	3.43196e+07
26	3990	1.91726e+06	1.37946e+06	1.75544e+06	1.25572e+06	1.52073e+06	3.62967e+08	3.43578e+07
27	4290	1.801e+06	1.17541e+06	1.48616e+06	1.2125e+06	1.55672e+06	3.61855e+08	3.43349e+07
28	4590	1.92011e+06	1.21646e+06	1.52168e+06	1.23355e+06	1.59462e+06	3.64801e+08	3.44039e+07
		Background corrected Data
	Time_(sec)	Roi1-bkgd-corr	Roi2-bkgd-corr	Roi3-bkgd-corr	Roi4-bkgd-corr	Roi5-bkgd-corr	Ref_fluo-bkgd-corr
1	0	1.28648e+06	826546	1.31507e+06	513843	1.14657e+06	9.06172e+07
2	30	1.22514e+06	865026	1.32054e+06	493420	1.08966e+06	8.95364e+07
3	60	1.23854e+06	871087	1.36006e+06	517687	1.12479e+06	9.0418e+07
4	90	1.35107e+06	913845	1.32319e+06	506667	1.09958e+06	9.07455e+07
5	120	1.32618e+06	838138	1.33867e+06	562890	1.0785e+06	9.00133e+07
6	150	1.26727e+06	952313	1.35137e+06	557855	1.0764e+06	9.0248e+07
7	180	1.37166e+06	931147	1.35936e+06	572503	1.03491e+06	8.98779e+07
8	210	785142	189107	278002	113521	341915	8.87572e+07
9	240	816702	231601	371324	174611	381597	8.92851e+07
10	270	840449	246749	399189	201112	394195	8.8767e+07
11	300	816743	260242	448551	174198	411851	8.81118e+07
12	330	826948	284840	472953	173966	424680	8.73264e+07
13	360	878479	314177	438347	166288	412563	8.70623e+07
14	390	862842	324020	444626	184287	411572	8.70385e+07
15	690	954281	427305	713100	267800	548467	8.76282e+07
16	990	1.04175e+06	391403	655974	299115	666135	8.89103e+07
17	1290	1.15208e+06	423704	844749	244520	620128	8.8771e+07
18	1590	1.05877e+06	418039	878572	281881	622380	8.83128e+07
19	1890	904214	543828	843386	319913	534475	8.801e+07
20	2190	914891	679851	800069	321976	574213	8.67246e+07
21	2490	886171	662404	806157	390175	538664	8.77904e+07
22	2790	925009	665563	857395	409400	524856	8.78888e+07
23	3090	938303	587965	862120	359419	709733	8.8039e+07
24	3390	944635	539087	827041	387592	576054	8.80269e+07
25	3690	959825	543238	830674	332976	477434	8.73325e+07
26	3990	1.01119e+06	473390	849369	349652	614658	8.86715e+07
27	4290	895540	269949	580691	307030	651256	8.7742e+07
28	4590	1.01283e+06	309180	614399	326263	687332	9.01369e+07
		Bleaching Corrected Data
	Time_(sec)	Roi1-bkgd_bleach-corr	Roi2-bkgd_bleach-corr	Roi3-bkgd_bleach-corr	Roi4-bkgd_bleach-corr	Roi5-bkgd_bleach-corr
1	0	0.0141968	0.00912129	0.0145123	0.00567047	0.0126529
2	30	0.0136831	0.00966116	0.0147486	0.00551083	0.01217
3	60	0.0136979	0.00963401	0.0150419	0.00572549	0.01244
4	90	0.0148885	0.0100704	0.0145813	0.00558338	0.0121172
5	120	0.0147332	0.00931127	0.014872	0.00625341	0.0119815
6	150	0.0140421	0.0105522	0.0149739	0.00618136	0.0119271
7	180	0.0152613	0.0103601	0.0151245	0.00636979	0.0115146
8	210	0.00884596	0.00213061	0.00313217	0.00127901	0.00385225
9	240	0.00914713	0.00259395	0.00415886	0.00195566	0.00427391
10	270	0.00946803	0.00277974	0.00449705	0.00226561	0.00444079
11	300	0.0092694	0.00295354	0.0050907	0.00197701	0.00467419
12	330	0.00946962	0.00326178	0.00541592	0.00199213	0.00486314
13	360	0.0100902	0.00360865	0.00503487	0.00190999	0.00473871
14	390	0.00991333	0.00372273	0.00510839	0.0021173	0.00472862
15	690	0.0108901	0.00487634	0.00813779	0.0030561	0.00625903
16	990	0.0117169	0.00440223	0.00737793	0.00336424	0.00749221
17	1290	0.0129782	0.004773	0.00951605	0.0027545	0.0069857
18	1590	0.0119888	0.00473362	0.00994841	0.00319185	0.00704745
19	1890	0.010274	0.00617916	0.00958284	0.00363496	0.00607289
20	2190	0.0105494	0.0078392	0.0092254	0.00371263	0.00662111
21	2490	0.0100942	0.00754529	0.00918275	0.0044444	0.0061358
22	2790	0.0105248	0.00757279	0.00975546	0.00465816	0.00597182
23	3090	0.0106578	0.00667846	0.00979248	0.0040825	0.00806157
24	3390	0.0107312	0.00612411	0.00939531	0.00440311	0.00654407
25	3690	0.0109905	0.00622035	0.00951163	0.00381274	0.00546685
26	3990	0.0114038	0.00533869	0.00957882	0.00394322	0.00693185
27	4290	0.0102065	0.00307662	0.00661816	0.00349924	0.0074224
28	4590	0.0112365	0.00343011	0.00681629	0.00361964	0.00762542
		Normalized Data
	Time_(sec)	Roi1_corr_norm	Roi2_corr_norm	Roi3_corr_norm	Roi4_corr_norm	Roi5_corr_norm
1	0	1	1	1	1	1
2	30	0.963816	1.05919	1.01628	0.971847	0.961836
3	60	0.964856	1.05621	1.03649	1.0097	0.98317
4	90	1.04872	1.10406	1.00475	0.984641	0.957659
5	120	1.03778	1.02083	1.02478	1.1028	0.94694
6	150	0.989099	1.15687	1.03181	1.0901	0.942636
7	180	1.07498	1.13582	1.04219	1.12333	0.910039
8	210	0.623094	0.233586	0.215828	0.225556	0.304456
9	240	0.644308	0.284384	0.286574	0.344884	0.337781
10	270	0.666912	0.304753	0.309878	0.399545	0.35097
11	300	0.65292	0.323808	0.350785	0.348649	0.369417
12	330	0.667023	0.357601	0.373195	0.351316	0.384349
13	360	0.710738	0.395629	0.346938	0.33683	0.374515
14	390	0.698278	0.408136	0.352004	0.37339	0.373718
15	690	0.76708	0.534611	0.560751	0.538949	0.494671
16	990	0.825315	0.482633	0.508391	0.593291	0.592134
17	1290	0.914158	0.523281	0.655722	0.485762	0.552103
18	1590	0.844471	0.518964	0.685515	0.56289	0.556983
19	1890	0.723682	0.677444	0.660325	0.641033	0.47996
20	2190	0.74308	0.85944	0.635695	0.65473	0.523288
21	2490	0.711016	0.827218	0.632756	0.783779	0.484933
22	2790	0.741346	0.830232	0.672219	0.821477	0.471972
23	3090	0.750718	0.732185	0.67477	0.719957	0.637132
24	3390	0.755887	0.671409	0.647403	0.776498	0.517199
25	3690	0.774149	0.681959	0.655418	0.672385	0.432063
26	3990	0.80326	0.5853	0.660048	0.695396	0.547847
27	4290	0.718929	0.337301	0.456037	0.617098	0.586616
28	4590	0.791482	0.376056	0.46969	0.638331	0.602662
		Normalize the bouton fluorescent right after bleaching to 0
	Recovery Time_(sec)
1	0	0	0	0	0	0
2	30	0.0546427	0.0602907	0.0877195	0.146453	0.0510328
3	60	0.112866	0.0844657	0.116615	0.213539	0.0712292
4	90	0.0768266	0.107081	0.167336	0.151074	0.0994779
5	120	0.113153	0.14719	0.195122	0.154347	0.122346
6	150	0.225754	0.192323	0.162566	0.136568	0.107286
7	180	0.193659	0.207168	0.168847	0.181439	0.106065
8	480	0.370881	0.357277	0.427678	0.384631	0.291289
9	780	0.520881	0.295585	0.362756	0.451325	0.44054
10	1080	0.749725	0.34383	0.545435	0.319354	0.379237
11	1380	0.570224	0.338706	0.582376	0.414013	0.386711
12	1680	0.259096	0.526801	0.551142	0.509919	0.268761
13	1980	0.309061	0.742806	0.520603	0.52673	0.335112
14	2280	0.22647	0.704563	0.516959	0.685114	0.276375
15	2580	0.304595	0.70814	0.56589	0.73138	0.256528
16	2880	0.328734	0.591771	0.569053	0.606784	0.509449
17	3180	0.34205	0.519638	0.53512	0.676177	0.325787
18	3480	0.389089	0.53216	0.545058	0.548398	0.195413
19	3780	0.464073	0.417438	0.550799	0.57664	0.37272
20	4080	0.246852	0.123096	0.297841	0.480544	0.43209
21	4380	0.433736	0.169093	0.314769	0.506604	0.456662

## Sheet: P554A-0131-C2
		Raw Data
	Time_(sec)	Roi1	Roi2	Roi3	Roi4	Roi5	Ref_fluo	Background
1	0	2150220	2953498	1656895	3496132	1864889	295536998	57469278
2	30	2.18152e+06	3.03044e+06	1.69258e+06	3.15123e+06	1.83716e+06	2.96979e+08	5.74785e+07			Filter out due to large abrupt change.
3	60	2.13286e+06	3.03251e+06	1.67268e+06	3.15351e+06	1.82153e+06	2.9638e+08	5.77433e+07
4	90	2.11827e+06	3.06712e+06	1.64961e+06	2.97098e+06	1.84588e+06	2.94937e+08	5.76239e+07
5	120	2.18027e+06	2.91647e+06	1.61965e+06	3.01827e+06	1.83325e+06	2.93467e+08	5.74187e+07
6	150	2.21326e+06	3.01431e+06	1.66545e+06	2.91652e+06	1.8819e+06	2.92555e+08	5.75733e+07
7	180	2.18419e+06	3.15193e+06	1.66555e+06	2.97916e+06	1.77044e+06	2.93269e+08	5.73976e+07
8	210	1.53243e+06	2.41216e+06	1.26089e+06	1.70322e+06	1.39535e+06	2.91408e+08	5.743e+07
9	240	1.62034e+06	2.50032e+06	1.29859e+06	2.05996e+06	1.4526e+06	2.92406e+08	5.74552e+07
10	270	1.5801e+06	2.63716e+06	1.29726e+06	2.20754e+06	1.4569e+06	2.91845e+08	5.74136e+07
11	300	1.57102e+06	2.41127e+06	1.3077e+06	2.42534e+06	1.42587e+06	2.90951e+08	5.72661e+07
12	330	1.6185e+06	2.37891e+06	1.31061e+06	2.43819e+06	1.44072e+06	2.90851e+08	5.73349e+07
13	360	1.59188e+06	2.66544e+06	1.28762e+06	2.44198e+06	1.45988e+06	2.91258e+08	5.74776e+07
14	390	1.5801e+06	2.73111e+06	1.32401e+06	2.39697e+06	1.4709e+06	2.91432e+08	5.74474e+07
15	690	1.58213e+06	2.44149e+06	1.42852e+06	2.63969e+06	1.53843e+06	2.93588e+08	5.71881e+07
16	990	1.55537e+06	2.64094e+06	1.37387e+06	2.84905e+06	1.53466e+06	2.96489e+08	5.73519e+07
17	1290	1.69675e+06	2.76467e+06	1.45717e+06	3.02102e+06	1.56476e+06	2.95161e+08	5.74329e+07
18	1590	1.57739e+06	2.63514e+06	1.43242e+06	3.24629e+06	1.61229e+06	2.96344e+08	5.73624e+07
19	1890	1.55808e+06	2.71429e+06	1.41727e+06	3.21636e+06	1.59368e+06	2.95013e+08	5.72683e+07
20	2190	1.63234e+06	2.48665e+06	1.40613e+06	3.29928e+06	1.62008e+06	2.98017e+08	5.74463e+07
21	2490	1.59286e+06	2.53656e+06	1.37361e+06	3.81759e+06	1.64386e+06	2.95059e+08	5.73519e+07
22	2790	1.57441e+06	2.54967e+06	1.4154e+06	3.63546e+06	1.62154e+06	2.93729e+08	5.72114e+07
23	3090	1.57601e+06	2.04775e+06	1.40392e+06	3.40865e+06	1.66942e+06	2.9528e+08	5.72336e+07
24	3390	1.81115e+06	2.50362e+06	1.40119e+06	3.79596e+06	1.66721e+06	2.97071e+08	5.71278e+07
25	3690	1.58791e+06	2.52146e+06	1.40237e+06	3.42231e+06	1.66745e+06	2.96411e+08	5.72857e+07
26	3990	1.58153e+06	2.64742e+06	1.61475e+06	3.48987e+06	1.64094e+06	2.94033e+08	5.70636e+07
27	4290	1.56216e+06	2.41564e+06	1.62088e+06	3.7301e+06	1.697e+06	2.95096e+08	5.73876e+07
28	4590	1.73436e+06	2.4223e+06	1.67291e+06	3.45384e+06	1.5611e+06	2.95677e+08	5.72198e+07
		Background corrected Data
	Time_(sec)	Roi1-bkgd-corr	Roi2-bkgd-corr	Roi3-bkgd-corr	Roi4-bkgd-corr	Roi5-bkgd-corr	Ref_fluo-bkgd-corr
1	0	1.18042e+06	1.9837e+06	687096	2.52633e+06	895090	1.7381e+08
2	30	1.21156e+06	2.06049e+06	722623	2.18128e+06	867204	1.75232e+08
3	60	1.15844e+06	2.05808e+06	698256	2.17908e+06	847104	1.74072e+08
4	90	1.14586e+06	2.09471e+06	677196	1.99857e+06	873467	1.72882e+08
5	120	1.21133e+06	1.94753e+06	650705	2.04932e+06	864303	1.71847e+08
6	150	1.2417e+06	2.04275e+06	693896	1.94496e+06	910345	1.70607e+08
7	180	1.2156e+06	2.18334e+06	696965	2.01057e+06	801849	1.71694e+08
8	210	563292	1.44302e+06	291751	734082	426213	1.69764e+08
9	240	650779	1.53076e+06	329033	1.09039e+06	483037	1.70708e+08
10	270	611244	1.6683e+06	328405	1.23868e+06	488042	1.70236e+08
11	300	604653	1.4449e+06	341330	1.45896e+06	459503	1.69654e+08
12	330	650970	1.41138e+06	343079	1.47066e+06	473191	1.69408e+08
13	360	621940	1.6955e+06	317676	1.47204e+06	489936	1.69513e+08
14	390	610666	1.76168e+06	354583	1.42754e+06	501473	1.69751e+08
15	690	617076	1.47643e+06	463467	1.67463e+06	573376	1.72457e+08
16	990	587547	1.67312e+06	406055	1.88123e+06	566839	1.7501e+08
17	1290	727565	1.79549e+06	487987	2.05183e+06	595575	1.73511e+08
18	1590	609390	1.66714e+06	464425	2.27829e+06	644290	1.74843e+08
19	1890	591668	1.74789e+06	450860	2.24996e+06	627276	1.73711e+08
20	2190	662926	1.51724e+06	436723	2.32986e+06	650666	1.76339e+08
21	2490	625046	1.56874e+06	405795	2.84977e+06	676046	1.7358e+08
22	2790	608961	1.58422e+06	449951	2.67001e+06	656092	1.72549e+08
23	3090	610187	1.08193e+06	438095	2.44283e+06	703597	1.74052e+08
24	3390	847118	1.53959e+06	437154	2.83192e+06	703169	1.76067e+08
25	3690	621213	1.55476e+06	435670	2.45561e+06	700745	1.75073e+08
26	3990	618572	1.68447e+06	651795	2.52692e+06	677982	1.73165e+08
27	4290	593742	1.44722e+06	652459	2.76168e+06	728577	1.73542e+08
28	4590	768770	1.45671e+06	707323	2.48825e+06	595513	1.74479e+08
		Bleaching Corrected Data
	Time_(sec)	Roi1-bkgd_bleach-corr	Roi2-bkgd_bleach-corr	Roi3-bkgd_bleach-corr	Roi4-bkgd_bleach-corr	Roi5-bkgd_bleach-corr
1	0	0.00679145	0.011413	0.00395314	0.014535	0.00514982
2	30	0.00691404	0.0117586	0.0041238	0.0124479	0.00494888
3	60	0.00665492	0.0118232	0.0040113	0.0125183	0.0048664
4	90	0.00662799	0.0121164	0.00391709	0.0115603	0.00505237
5	120	0.00704889	0.0113329	0.00378654	0.0119253	0.0050295
6	150	0.00727813	0.0119734	0.00406722	0.0114002	0.00533592
7	180	0.00708003	0.0127165	0.00405935	0.0117102	0.00467023
8	210	0.00331809	0.00850016	0.00171857	0.00432414	0.00251062
9	240	0.00381222	0.00896709	0.00192746	0.00638747	0.0028296
10	270	0.00359056	0.00979989	0.00192911	0.00727621	0.00286685
11	300	0.00356404	0.00851676	0.00201192	0.00859966	0.00270848
12	330	0.00384261	0.00833122	0.00202516	0.00868116	0.0027932
13	360	0.00366898	0.0100022	0.00187405	0.00868393	0.00289025
14	390	0.00359741	0.010378	0.00208884	0.00840962	0.00295417
15	690	0.00357816	0.00856118	0.00268744	0.00971045	0.00332475
16	990	0.00335721	0.00956011	0.00232017	0.0107492	0.00323889
17	1290	0.0041932	0.010348	0.00281243	0.0118254	0.00343249
18	1590	0.00348536	0.00953509	0.00265624	0.0130305	0.00368497
19	1890	0.00340604	0.010062	0.00259546	0.0129523	0.00361103
20	2190	0.00375939	0.00860413	0.00247662	0.0132124	0.00368987
21	2490	0.0036009	0.00903756	0.00233779	0.0164176	0.00389472
22	2790	0.00352921	0.0091813	0.00260767	0.015474	0.00380236
23	3090	0.00350577	0.00621612	0.00251704	0.0140351	0.00404245
24	3390	0.00481133	0.00874431	0.00248288	0.0160843	0.00399375
25	3690	0.00354832	0.00888063	0.00248851	0.0140262	0.0040026
26	3990	0.00357216	0.00972756	0.00376402	0.0145926	0.00391525
27	4290	0.00342132	0.00833932	0.00375966	0.0159136	0.00419828
28	4590	0.0044061	0.00834896	0.00405392	0.0142611	0.0034131
		Normalized Data
	Time_(sec)	Roi1_corr_norm	Roi2_corr_norm	Roi3_corr_norm	Roi4_corr_norm	Roi5_corr_norm
1	0	1	1	1	1	1
2	30	1.01805	1.03028	1.04317	0.856407	0.960981
3	60	0.979898	1.03594	1.01471	0.861248	0.944964
4	90	0.975931	1.06163	0.99088	0.79534	0.981078
5	120	1.03791	0.992981	0.957856	0.820451	0.976636
6	150	1.07166	1.0491	1.02886	0.784329	1.03614
7	180	1.04249	1.11421	1.02687	0.805655	0.906872
8	210	0.488569	0.744776	0.434736	0.297498	0.487517
9	240	0.561327	0.785689	0.487575	0.439453	0.549456
10	270	0.528689	0.858657	0.487995	0.500598	0.55669
11	300	0.524784	0.74623	0.508941	0.59165	0.525936
12	330	0.565801	0.729974	0.512291	0.597257	0.542388
13	360	0.540235	0.876381	0.474065	0.597448	0.561233
14	390	0.529698	0.909314	0.5284	0.578576	0.573644
15	690	0.526862	0.750123	0.679823	0.668072	0.645606
16	990	0.494329	0.837649	0.586918	0.73954	0.628932
17	1290	0.617423	0.906682	0.711441	0.813579	0.666527
18	1590	0.513198	0.835456	0.671932	0.896489	0.715553
19	1890	0.50152	0.881625	0.656555	0.891108	0.701195
20	2190	0.553548	0.753886	0.626492	0.909006	0.716504
21	2490	0.530212	0.791863	0.591375	1.12952	0.756282
22	2790	0.519656	0.804457	0.659645	1.0646	0.738349
23	3090	0.516204	0.544651	0.636717	0.965602	0.784969
24	3390	0.70844	0.766168	0.628077	1.10659	0.775513
25	3690	0.522469	0.778113	0.629501	0.964993	0.77723
26	3990	0.525979	0.85232	0.952158	1.00396	0.760268
27	4290	0.503769	0.730683	0.951056	1.09485	0.815228
28	4590	0.648771	0.731528	1.02549	0.981152	0.662761
		Normalize the bouton fluorescent right after bleaching to 0
	Recovery Time_(sec)
1	0	0	0	0	0	0
2	30	0.137429	0.138304	0.0920278	0.258709	0.127745
3	60	0.07578	0.384977	0.0927588	0.370144	0.142664
4	90	0.0684046	0.00491522	0.12924	0.536084	0.0792363
5	120	0.145879	-0.0500394	0.135073	0.546302	0.113167
6	150	0.0975885	0.444892	0.068497	0.54665	0.152034
7	180	0.0776854	0.55622	0.163129	0.512256	0.177632
8	480	0.0723293	0.0180732	0.426856	0.67536	0.326048
9	780	0.0108799	0.313956	0.265048	0.805608	0.291659
10	1080	0.243385	0.547324	0.481923	0.940541	0.369196
11	1380	0.0465201	0.306542	0.413112	1.09164	0.470308
12	1680	0.0244612	0.462618	0.38633	1.08184	0.440697
13	1980	0.122735	0.030794	0.333972	1.11445	0.47227
14	2280	0.0786561	0.159176	0.27281	1.51633	0.55431
15	2580	0.0587176	0.201752	0.391713	1.39801	0.517323
16	2880	0.0521975	-0.676526	0.35178	1.2176	0.613475
17	3180	0.415302	0.0723147	0.336732	1.47454	0.593972
18	3480	0.0640308	0.112695	0.339212	1.21649	0.597515
19	3780	0.0706624	0.363552	0.901166	1.2875	0.562531
20	4080	0.0287098	-0.0476415	0.899247	1.45314	0.675882
21	4380	0.302598	-0.0447858	1.02889	1.24594	0.36143

[truncated: 3 more sheets: P554A-0131-C5, P554A-0201-C2, P554A-0201-C4]
