# Supplementary material for: A proline-rich motif on VGLUT1 reduces synaptic vesicle super-pool and spontaneous release frequency
Source: eLife journal article supplement (doi:10.7554/elife.50401), 2019-10-30
Supplement: supp [file elife-50401-supp-v1.zip › elife_poa_e50401_Figure_4_source_data_2.xlsx]

## Sheet: WT 30july F1
time	b1	b2	b3	b4	b5	background	c1	c2	c3	c4	c5	c6	c7	c8
0	511107	315718	392494	162406	305201	20034	401735	308208	240758	156411	405207	159705	258997	264178
30	488343	335833	399966	161106	297679	21185	401505	320131	243553	151481	408372	152151	266154	265623
60	464314	311703	387549	168075	289794	21382	405417	310136	243938	151390	395473	160804	265214	251223
90	465355	323815	386143	152296	274267	19149	392734	309277	230304	147157	386007	171840	258149	255259
120	467577	306230	387350	147498	276898	20005	376582	288424	221512	146504	384926	158704	258201	246797
130	41571	26365	35202	38759	44769	19914	360073	282677	228967	145134	369411	168179	247540	258011
160	64564	38553	46731	43811	57912	19041	368653	276354	246130	139206	359340	159615	247187	237360
190	74532	43502	57331	43440	70565	20832	381387	268197	231113	138158	355210	174418	237331	231979
220	76913	43387	62789	44996	76639	19608	366944	273904	223733	139151	360399	165920	234126	221692
250	79963	48402	67610	44057	84849	20877	356833	270029	219253	140654	335807	161053	242781	229699
280	80074	58215	69875	47762	83326	20429	359241	276471	226604	139945	350326	158054	238069	237824
310	84287	58308	69225	47703	86536	20028	343262	258749	215987	139820	309392	148753	228370	224457
320	80918	55187	64793	47571	86886	19121	337644	263408	213813	136760	322466	152664	221844	222483
620	121079	82226	93223	50720	116628	19950	380353	262104	228329	138273	343271	165919	230941	249668
920	137267	83789	110749	57114	137218	20699	390424	253021	221581	136119	330172	196985	226329	242806
1220	137547	83569	125854	65699	145616	20953	412649	287412	215782	136961	338931	163204	234153	241150
1520	165265	105784	136764	69145	151020	21208	408888	289378	240508	138127	390717	179872	248652	227248
1820	171746	93963	163824	69965	157880	21648	449523	304265	275598	144481	378132	166192	257386	246236
2120	176929	92002	160752	77925	193795	20535	433274	322661	304148	140289	370367	157856	259990	237108
2420	189402	104735	171073	82962	182009	22295	473056	351643	300942	130538	372663	144349	262189	249771
2720	185103	109084	171575	80937	198773	21647	436051	331190	282926	132912	354154	165464	284041	282801
3020	209423	122023	178246	91812	210804	22087	443260	328791	313214	138787	343405	192607	260790	238906
3320	204127	133907	167722	101505	245974	20755	462805	320311	296039	136734	355606	212616	261746	242873
3620	221261	123938	189834	85189	214740	22064	458644	303697	315922	136318	354970	171101	265411	244273
3920	217238	125851	180753	88299	211704	21416	445557	294408	274963	143257	359766	152597	254447	239477
4220	231346	122523	186744	87723	237477	21566	406570	306717	289026	142909	362121	219301	266213	255495
4520	231393	128026	185343	91741	215744	21253	459259	286661	307302	141415	352575	198325	238838	227215
time
0	491073	295684	372460	142372	285167	381701	288174	220724	136377	385173	139671	238963	244144
30	467158	314648	378781	139921	276494	380320	298946	222368	130296	387187	130966	244969	244438
60	442932	290321	366167	146693	268412	384035	288754	222556	130008	374091	139422	243832	229841
90	446206	304666	366994	133147	255118	373585	290128	211155	128008	366858	152691	239000	236110
120	447572	286225	367345	127493	256893	356577	268419	201507	126499	364921	138699	238196	226792
130	21657	6451	15288	18845	24855	340159	262763	209053	125220	349497	148265	227626	238097
160	45523	19512	27690	24770	38871	349612	257313	227089	120165	340299	140574	228146	218319
190	53700	22670	36499	22608	49733	360555	247365	210281	117326	334378	153586	216499	211147
220	57305	23779	43181	25388	57031	347336	254296	204125	119543	340791	146312	214518	202084
250	59086	27525	46733	23180	63972	335956	249152	198376	119777	314930	140176	221904	208822
280	59645	37786	49446	27333	62897	338812	256042	206175	119516	329897	137625	217640	217395
310	64259	38280	49197	27675	66508	323234	238721	195959	119792	289364	128725	208342	204429
320	61797	36066	45672	28450	67765	318523	244287	194692	117639	303345	133543	202723	203362
620	101129	62276	73273	30770	96678	360403	242154	208379	118323	323321	145969	210991	229718
920	116568	63090	90050	36415	116519	369725	232322	200882	115420	309473	176286	205630	222107
1220	116594	62616	104901	44746	124663	391696	266459	194829	116008	317978	142251	213200	220197
1520	144057	84576	115556	47937	129812	387680	268170	219300	116919	369509	158664	227444	206040
1820	150098	72315	142176	48317	136232	427875	282617	253950	122833	356484	144544	235738	224588
2120	156394	71467	140217	57390	173260	412739	302126	283613	119754	349832	137321	239455	216573
2420	167107	82440	148778	60667	159714	450761	329348	278647	108243	350368	122054	239894	227476
2720	163456	87437	149928	59290	177126	414404	309543	261279	111265	332507	143817	262394	261154
3020	187336	99936	156159	69725	188717	421173	306704	291127	116700	321318	170520	238703	216819
3320	183372	113152	146967	80750	225219	442050	299556	275284	115979	334851	191861	240991	222118
3620	199197	101874	167770	63125	192676	436580	281633	293858	114254	332906	149037	243347	222209
3920	195822	104435	159337	66883	190288	424141	272992	253547	121841	338350	131181	233031	218061
4220	209780	100957	165178	66157	215911	385004	285151	267460	121343	340555	197735	244647	233929
4520	210140	106773	164090	70488	194491	438006	265408	286049	120162	331322	177072	217585	205962
	AVERAGE OF PREBLEACH
	458988	298309	370349	137925	268417	375244	286884	215662	130238	375646	140290	240992	236265
NORMALIZED DATA
time	b1	b2	b3	b4	b5	c1	c2	c3	c4	c5	c6	c7	c8	Average of controls
120	1	1	1	1	1	1	1	1	1	1	1	1	1	1
130	0.0471842	0.0216252	0.0412799	0.136632	0.0925985	0.906502	0.91592	0.969355	0.961473	0.930389	1.05685	0.944538	1.00775	0.961597
160	0.0991812	0.0654087	0.0747672	0.17959	0.144816	0.931693	0.896923	1.05299	0.92266	0.905903	1.00203	0.946695	0.924043	0.947866
190	0.116996	0.0759951	0.0985529	0.163915	0.185283	0.960856	0.862247	0.975049	0.900861	0.890141	1.09478	0.898366	0.893687	0.934498
220	0.124851	0.0797127	0.116595	0.184071	0.212472	0.925628	0.886406	0.946504	0.917884	0.907213	1.04293	0.890146	0.855328	0.921505
250	0.128731	0.0922702	0.126186	0.168062	0.238331	0.895301	0.868476	0.919847	0.919681	0.838369	0.999189	0.920794	0.883847	0.905688
280	0.129949	0.126667	0.133512	0.198173	0.234326	0.902912	0.892493	0.95601	0.917677	0.878212	0.981005	0.903101	0.920132	0.918943
310	0.140001	0.128323	0.132839	0.200652	0.247779	0.861398	0.832116	0.908639	0.919796	0.77031	0.917565	0.864518	0.865253	0.867449
320	0.134637	0.120902	0.123321	0.206271	0.252462	0.848843	0.851518	0.902765	0.903264	0.807529	0.951908	0.841202	0.860737	0.870971
620	0.22033	0.208764	0.197848	0.223092	0.360179	0.960451	0.844083	0.96623	0.908516	0.860707	1.04048	0.87551	0.97229	0.928534
920	0.253967	0.211492	0.243149	0.26402	0.434097	0.985293	0.809811	0.931467	0.886226	0.823842	1.25658	0.853265	0.940076	0.935821
1220	0.254024	0.209903	0.283249	0.324422	0.464438	1.04384	0.928803	0.9034	0.890741	0.846483	1.01398	0.884677	0.931992	0.93049
1520	0.313858	0.283518	0.312019	0.347558	0.483621	1.03314	0.934767	1.01687	0.897736	0.983663	1.13097	0.943782	0.872072	0.976626
1820	0.327019	0.242417	0.383897	0.350313	0.507539	1.14026	0.985126	1.17754	0.943145	0.948989	1.03032	0.978198	0.950577	1.01927
2120	0.340736	0.239574	0.378607	0.416095	0.645489	1.09992	1.05313	1.31508	0.919504	0.931281	0.978838	0.993622	0.916653	1.026
2420	0.364077	0.276358	0.401723	0.439854	0.595022	1.20125	1.14802	1.29205	0.831119	0.932708	0.870013	0.995444	0.9628	1.02918
2720	0.356122	0.293109	0.404829	0.429871	0.659892	1.10436	1.07898	1.21152	0.854323	0.88516	1.02514	1.08881	1.10534	1.04421
3020	0.40815	0.335009	0.421653	0.505528	0.703074	1.1224	1.06909	1.34992	0.896055	0.855374	1.21548	0.990502	0.917694	1.05206
3320	0.399514	0.379312	0.396833	0.585462	0.839064	1.17803	1.04417	1.27646	0.890519	0.8914	1.3676	0.999996	0.940122	1.07354
3620	0.433992	0.341505	0.453005	0.457676	0.717824	1.16346	0.981696	1.36259	0.877274	0.886223	1.06235	1.00977	0.940507	1.03548
3920	0.426638	0.35009	0.430234	0.484922	0.708927	1.13031	0.951576	1.17567	0.935529	0.900715	0.935072	0.966966	0.922951	0.989848
4220	0.457049	0.338431	0.446006	0.479659	0.804387	1.02601	0.993959	1.24018	0.931705	0.906585	1.40948	1.01517	0.990113	1.06415
4520	0.457833	0.357928	0.443068	0.51106	0.724586	1.16726	0.92514	1.32638	0.922637	0.882006	1.26219	0.902872	0.871741	1.03253
CORRECTED DATA
Time	b1	b2	b3	b4	b5
120	1	1	1	1	1
130	0.0490686	0.0224889	0.0429285	0.142089	0.0962966
160	0.104636	0.0690063	0.0788795	0.189468	0.152781
190	0.125197	0.0813218	0.105461	0.175404	0.19827
220	0.135486	0.0865028	0.126527	0.19975	0.230571
250	0.142136	0.101879	0.139326	0.185563	0.263149
280	0.141411	0.13784	0.145288	0.215653	0.254995
310	0.161394	0.147932	0.153138	0.231313	0.285641
320	0.154583	0.138812	0.141591	0.236829	0.289863
620	0.237288	0.224831	0.213076	0.240263	0.387901
920	0.271385	0.225997	0.259824	0.282127	0.463868
1220	0.273	0.225584	0.304408	0.348657	0.499133
1520	0.32137	0.290304	0.319487	0.355876	0.495196
1820	0.320837	0.237834	0.376639	0.34369	0.497944
2120	0.332101	0.233502	0.369012	0.405549	0.629129
2420	0.353756	0.268524	0.390335	0.427385	0.578154
2720	0.341046	0.280701	0.387691	0.411673	0.631956
3020	0.387951	0.31843	0.400786	0.48051	0.668281
3320	0.372146	0.353328	0.36965	0.545358	0.781588
3620	0.41912	0.329803	0.437481	0.441992	0.693226
3920	0.431014	0.353681	0.434647	0.489896	0.716198
4220	0.429497	0.31803	0.41912	0.450744	0.755897
4520	0.44341	0.346652	0.42911	0.49496	0.70176
	Normalize the bouton fluorescent right after bleaching to 0
Recovery Time_(sec)	b1	b2	b3	b4	b5
0	0	0	0	0	0
30	0.0584351	0.0475876	0.0375636	0.0552262	0.0625032
60	0.0800568	0.0601865	0.0653371	0.0388335	0.112839
90	0.0908763	0.0654866	0.0873483	0.0672117	0.148582
120	0.0978699	0.0812161	0.100722	0.0506747	0.184632
150	0.0971077	0.118005	0.106951	0.0857481	0.175609
180	0.118122	0.128329	0.115153	0.104002	0.20952
190	0.110959	0.119	0.103088	0.110432	0.214192
490	0.197932	0.206998	0.177779	0.114434	0.322677
790	0.233788	0.20819	0.226624	0.163231	0.406739
1090	0.235487	0.207767	0.273208	0.240781	0.445762
1390	0.286352	0.273977	0.288963	0.249196	0.441405
1690	0.285792	0.220299	0.348679	0.234991	0.444446
1990	0.297637	0.215868	0.340709	0.307096	0.58961
2290	0.320409	0.251695	0.362989	0.332548	0.533203
2590	0.307044	0.264152	0.360226	0.314233	0.592738
2890	0.356369	0.302749	0.373909	0.394471	0.632933
3190	0.339749	0.338451	0.341376	0.470059	0.758314
3490	0.389146	0.314384	0.41225	0.349574	0.660537
3790	0.401654	0.338811	0.409288	0.405411	0.685957
4090	0.400058	0.30234	0.393065	0.359775	0.729886
4390	0.41469	0.331621	0.403504	0.411315	0.66998

## Sheet: WT 31july F3
time	b1	b2	b3	b4	b5	background	c1	c2	c3	c4	c5	c6	c7	c8
1	283760	501269	357170	312347	340812	6993	220595	468575	475642	299697	330781	286544	288853	258511
2	273270	494031	364310	301604	356502	7085	213904	447500	480294	285064	332411	284492	279672	251339
3	271303	478631	358110	301502	350450	7195	221146	444697	470272	295067	315865	271964	306346	249846
4	262466	490550	352115	286773	353412	7023	219336	451695	463709	293979	316786	272791	278088	236571
5	257102	481364	343396	285193	349875	7355	213372	435331	466781	289305	319764	270057	271197	232925
6	22565	44359	20332	42936	26466	6968	211585	430028	437671	279004	278350	256583	268056	218813
7	33087	60093	28253	53720	36449	6778	209604	429917	462528	261581	253707	247208	264989	206541
8	37095	64207	32239	60949	40474	6583	194079	421028	438904	278423	252181	257199	261811	215631
9	38069	72542	34463	62540	40173	6669	194646	418882	432479	271534	252208	251658	263889	218818
10	42073	74147	35819	63398	44599	6839	197641	422214	424922	280644	265751	257159	262879	220660
11	42717	75939	37632	64036	47599	6598	202993	424636	426369	281263	257114	253081	259897	210728
12	44818	80506	37767	65392	45726	6508	207903	423369	419135	288390	254246	253392	264240	195132
13	43270	76583	36915	67852	44142	7348	208357	418798	412766	280269	257783	254660	250732	193018
14	70909	100692	44915	65062	61482	7309	201505	469509	470952	287966	258401	261902	269426	197716
15	82055	99379	46405	81377	63339	6830	234551	463579	461971	319656	283141	276392	299460	189869
16	95629	107501	40641	84023	68035	7773	237225	444544	478976	354165	318082	292425	299094	204219
17	110710	124196	69429	86010	74835	7357	218750	479007	455156	372025	283938	280821	327667	201547
18	151560	133199	63530	86513	82050	7108	224305	486915	493543	371505	297376	282913	334656	232646
19	138665	142800	89755	90035	79003	7728	243308	490820	506116	389441	344244	302756	322285	241580
20	159993	171333	98213	104040	86525	8138	218099	459705	505691	377286	322869	272391	320649	242564
21	114095	174505	106789	105874	92218	7430	212163	429009	506873	377139	316066	280611	302845	233294
22	110685	168955	117417	115251	98819	7972	191947	447968	462176	368022	293450	286306	323719	230521
23	116425	157636	128304	121062	101435	7407	199934	468068	472478	391450	300560	271305	306051	231076
24	152402	177663	132306	112139	90377	7196	213538	438431	489662	390203	299965	274683	309981	240482
25	147537	180650	137825	121885	106291	8019	208854	397048	488269	387152	290152	271657	299855	228520
26	169813	204900	142926	115643	116856	7424	191725	381618	494167	397351	268771	266301	292471	220754
27	163493	189228	150776	130951	111910	7613	192299	431163	485390	402835	260667	264735	310291	231967
time
0	276767	494276	350177	305354	333819	213602	461582	468649	292704	323788	279551	281860	251518
30	266185	486946	357225	294519	349417	206819	440415	473209	277979	325326	277407	272587	244254
60	264108	471436	350915	294307	343255	213951	437502	463077	287872	308670	264769	299151	242651
90	255443	483527	345092	279750	346389	212313	444672	456686	286956	309763	265768	271065	229548
120	249747	474009	336041	277838	342520	206017	427976	459426	281950	312409	262702	263842	225570
130	15597	37391	13364	35968	19498	204617	423060	430703	272036	271382	249615	261088	211845
160	26309	53315	21475	46942	29671	202826	423139	455750	254803	246929	240430	258211	199763
190	30512	57624	25656	54366	33891	187496	414445	432321	271840	245598	250616	255228	209048
220	31400	65873	27794	55871	33504	187977	412213	425810	264865	245539	244989	257220	212149
250	35234	67308	28980	56559	37760	190802	415375	418083	273805	258912	250320	256040	213821
280	36119	69341	31034	57438	41001	196395	418038	419771	274665	250516	246483	253299	204130
310	38310	73998	31259	58884	39218	201395	416861	412627	281882	247738	246884	257732	188624
320	35922	69235	29567	60504	36794	201009	411450	405418	272921	250435	247312	243384	185670
620	63600	93383	37606	57753	54173	194196	462200	463643	280657	251092	254593	262117	190407
920	75225	92549	39575	74547	56509	227721	456749	455141	312826	276311	269562	292630	183039
1220	87856	99728	32868	76250	60262	229452	436771	471203	346392	310309	284652	291321	196446
1520	103353	116839	62072	78653	67478	211393	471650	447799	364668	276581	273464	320310	194190
1820	144452	126091	56422	79405	74942	217197	479807	486435	364397	290268	275805	327548	225538
2120	130937	135072	82027	82307	71275	235580	483092	498388	381713	336516	295028	314557	233852
2420	151855	163195	90075	95902	78387	209961	451567	497553	369148	314731	264253	312511	234426
2720	106665	167075	99359	98444	84788	204733	421579	499443	369709	308636	273181	295415	225864
3020	102713	160983	109445	107279	90847	183975	439996	454204	360050	285478	278334	315747	222549
3320	109018	150229	120897	113655	94028	192527	460661	465071	384043	293153	263898	298644	223669
3620	145206	170467	125110	104943	83181	206342	431235	482466	383007	292769	267487	302785	233286
3920	139518	172631	129806	113866	98272	200835	389029	480250	379133	282133	263638	291836	220501
4220	162389	197476	135502	108219	109432	184301	374194	486743	389927	261347	258877	285047	213330
4520	155880	181615	143163	123338	104297	184686	423550	477777	395222	253054	257122	302678	224354
	AVERAGE OF PREBLEACH
	262450	482039	347890	290354	343080	210540	442429	464209	285492	315991	270039	277701	238708
NORMALIZED DATA
time	b1	b2	b3	b4	b5	c1	c2	c3	c4	c5	c6	c7	c8	Average of controls
120	1	1	1	1	1	1	1	1	1	1	1	1	1	1
130	0.0594285	0.0775684	0.0384144	0.123877	0.0568322	0.971866	0.95622	0.927821	0.952867	0.858828	0.924365	0.940177	0.887464	0.927451
160	0.100244	0.110603	0.0617293	0.161672	0.0864842	0.963359	0.956399	0.981777	0.892504	0.781443	0.890352	0.929817	0.83685	0.904062
190	0.116258	0.119542	0.0737474	0.187241	0.0987845	0.890546	0.936748	0.931306	0.95218	0.777231	0.928072	0.919075	0.875747	0.901363
220	0.119642	0.136655	0.0798931	0.192424	0.0976565	0.892831	0.931703	0.91728	0.927749	0.777044	0.907234	0.926248	0.888738	0.896103
250	0.13425	0.139632	0.0833022	0.194794	0.110062	0.906249	0.93885	0.900634	0.959063	0.819365	0.926976	0.921999	0.895742	0.90861
280	0.137622	0.143849	0.0892064	0.197821	0.119509	0.932814	0.944869	0.904271	0.962075	0.792794	0.912767	0.912129	0.855144	0.902108
310	0.145971	0.15351	0.0898531	0.202801	0.114312	0.956562	0.942209	0.888881	0.987354	0.784003	0.914252	0.928092	0.790187	0.898942
320	0.136872	0.14363	0.0849895	0.20838	0.107246	0.954729	0.929979	0.873352	0.955967	0.792538	0.915837	0.876425	0.777812	0.88458
620	0.242332	0.193725	0.108097	0.198906	0.157902	0.922369	1.04469	0.99878	0.983064	0.794617	0.942799	0.943882	0.797656	0.928482
920	0.286626	0.191995	0.113757	0.256746	0.164711	1.0816	1.03237	0.980465	1.09574	0.874426	0.998232	1.05376	0.76679	0.985423
1220	0.334753	0.206888	0.0944781	0.262611	0.17565	1.08982	0.987211	1.01507	1.21332	0.982018	1.05411	1.04905	0.822955	1.02669
1520	0.393801	0.242385	0.178424	0.270887	0.196683	1.00405	1.06605	0.964649	1.27733	0.875281	1.01268	1.15343	0.813504	1.02087
1820	0.550398	0.261579	0.162183	0.273477	0.218439	1.03162	1.08448	1.04788	1.27638	0.918595	1.02135	1.1795	0.944827	1.06308
2120	0.498903	0.28021	0.235784	0.283472	0.20775	1.11893	1.09191	1.07363	1.33703	1.06495	1.09254	1.13272	0.979656	1.11142
2420	0.578605	0.338552	0.258918	0.330294	0.22848	0.997248	1.02065	1.07183	1.29302	0.996012	0.978572	1.12535	0.982061	1.05809
2720	0.40642	0.346601	0.285605	0.339049	0.247138	0.972417	0.952873	1.0759	1.29499	0.976723	1.01163	1.06379	0.946193	1.03681
3020	0.391362	0.333963	0.314597	0.369477	0.264798	0.873823	0.9945	0.978446	1.26116	0.903437	1.03072	1.137	0.932306	1.01392
3320	0.415386	0.311653	0.347515	0.391437	0.27407	0.914442	1.04121	1.00186	1.3452	0.927725	0.977257	1.07542	0.936998	1.02751
3620	0.553271	0.353638	0.359625	0.361432	0.242454	0.980059	0.974698	1.03933	1.34157	0.92651	0.990548	1.09033	0.977285	1.04004
3920	0.531598	0.358127	0.373124	0.392163	0.28644	0.953902	0.879302	1.03455	1.328	0.892851	0.976295	1.0509	0.923726	1.00494
4220	0.618743	0.409668	0.389497	0.372715	0.318969	0.875371	0.845771	1.04854	1.36581	0.827071	0.958664	1.02645	0.893685	0.98017
4520	0.593942	0.376764	0.411518	0.424786	0.304002	0.8772	0.957328	1.02923	1.38435	0.800826	0.952165	1.08994	0.939867	1.00386
CORRECTED DATA
Time	b1	b2	b3	b4	b5
120	1	1	1	1	1
130	0.0640772	0.0836362	0.0414194	0.133567	0.0612779
160	0.110882	0.12234	0.0682799	0.178828	0.0956618
190	0.128981	0.132624	0.0818177	0.207731	0.109595
220	0.133513	0.152499	0.0891561	0.214734	0.108979
250	0.147754	0.153676	0.0916809	0.214386	0.121132
280	0.152556	0.159459	0.0988866	0.219287	0.132477
310	0.16238	0.170768	0.0999542	0.2256	0.127162
320	0.154731	0.16237	0.096079	0.23557	0.12124
620	0.260998	0.208647	0.116424	0.214227	0.170065
920	0.290866	0.194835	0.11544	0.260544	0.167147
1220	0.32605	0.201509	0.0920218	0.255783	0.171083
1520	0.385749	0.237429	0.174776	0.265349	0.192662
1820	0.51774	0.246057	0.15256	0.25725	0.205478
2120	0.448887	0.252119	0.212147	0.255053	0.186923
2420	0.546838	0.319964	0.244702	0.312159	0.215936
2720	0.391989	0.334294	0.275464	0.32701	0.238362
3020	0.385988	0.329377	0.310276	0.364403	0.261162
3320	0.404264	0.303309	0.33821	0.380956	0.266732
3620	0.531971	0.340023	0.34578	0.347517	0.233119
3920	0.528985	0.356366	0.371289	0.390235	0.285032
4220	0.63126	0.417956	0.397377	0.380255	0.325422
4520	0.591656	0.375314	0.409934	0.423151	0.302832
	Normalize the bouton fluorescent right after bleaching to 0
Recovery Time_(sec)	b1	b2	b3	b4	b5
0	0	0	0	0	0
30	0.0500088	0.0422364	0.0280211	0.0522389	0.0366284
60	0.069347	0.0534587	0.0421439	0.0855967	0.0514707
90	0.0741901	0.075148	0.0497994	0.09368	0.0508151
120	0.0894052	0.0764328	0.0524333	0.0932785	0.0637614
150	0.0945369	0.0827434	0.0599503	0.0989351	0.0758468
180	0.105033	0.0950841	0.0610641	0.10622	0.0701851
190	0.0968602	0.0859203	0.0570214	0.117728	0.063876
490	0.210403	0.136421	0.0782453	0.0930945	0.115888
790	0.242316	0.121348	0.077219	0.146551	0.112781
1090	0.279909	0.128631	0.0527889	0.141057	0.116973
1390	0.343695	0.16783	0.139119	0.152097	0.13996
1690	0.484722	0.177246	0.115943	0.14275	0.153613
1990	0.411156	0.18386	0.178104	0.140215	0.133847
2290	0.515812	0.257897	0.212067	0.206124	0.164754
2590	0.350362	0.273535	0.244157	0.223264	0.188644
2890	0.34395	0.268169	0.280474	0.266422	0.212932
3190	0.363477	0.239722	0.309615	0.285526	0.218865
3490	0.499928	0.279787	0.317512	0.246932	0.183059
3790	0.496737	0.297622	0.344123	0.296235	0.23836
4090	0.606015	0.364833	0.371338	0.284717	0.281387
4390	0.563699	0.318299	0.384438	0.334225	0.257322

## Sheet: WT 31july F5
time	b1	b2	b3	b4	b5	background	c1	c2	c3	c4	c5	c6	c7	c8
1	337960	283663	289495	368831	294544	7641	290773	181068	311405	200568	426172	287794	410271	254494
2	324725	272085	294982	324979	291610	7460	274818	181174	292023	202466	415646	273701	392253	229646
3	313665	263385	275727	328914	292314	7242	265456	184262	272599	202755	392236	282854	385647	236187
4	317722	253247	280046	332954	286847	7896	263645	168571	282910	194820	382546	281521	397849	227423
5	296847	240987	268977	339269	295553	8061	250540	187838	281269	201573	385082	268295	384594	224446
6	27298	28823	19373	33558	21800	7839	243341	178158	254837	199273	337512	268429	376189	219694
7	41736	44431	29843	48968	32419	8690	246595	170458	245303	185544	346754	268444	370485	220728
8	49740	53716	37191	56457	36693	7561	247581	178153	215616	180329	341006	267098	374225	214407
9	59164	57007	43563	59147	42417	8468	247889	180598	228259	177202	323894	264848	354855	209453
10	66964	69427	42171	62887	42162	7554	237778	170938	246698	171761	311189	256604	349649	222373
11	67562	69782	41874	63680	44830	8194	232418	176243	242574	178873	314766	262322	372749	216678
12	68912	70991	43797	74839	45863	7793	219244	180299	222638	175637	320648	244507	357298	214923
13	66646	71270	43819	72179	48008	7981	214037	172657	238604	164028	336527	246943	342783	215207
14	97339	98114	66414	104220	62118	8663	227568	172200	247415	167790	369212	270524	352705	232181
15	106561	116738	70565	118988	83589	8167	222749	186116	288355	150280	356545	288066	349904	218260
16	119024	131342	90461	147965	88717	8055	201985	191445	276811	179181	379347	290478	363349	234493
17	119918	158780	96678	139088	114909	7753	176330	195251	283622	180565	403687	267853	349844	234081
18	136112	141158	133620	144717	116508	7496	202202	212155	291895	181939	408549	295679	337818	200033
19	133222	148904	127335	126920	118249	7635	197804	214552	280567	184872	423304	276815	331952	210695
20	131059	133195	127122	128223	138797	7451	209435	244833	293795	175528	389442	278050	297197	169875
21	152897	142453	135549	116436	127695	7560	202707	229218	271496	176263	371127	268379	276928	202601
22	158175	150941	132858	107022	126308	7834	201692	239899	271750	177796	377934	259300	281539	187086
23	157005	153474	130996	125075	116445	7707	227760	228010	289998	175998	353692	266491	281601	187581
24	159391	116779	139705	127911	133155	7855	211664	233774	279665	163648	314812	270355	272346	194143
25	168235	142428	152749	138804	132821	8029	203035	230269	265123	176478	313651	253070	275511	164455
26	177243	125493	147144	146584	142927	8094	199699	241795	287679	169682	336037	267780	274548	176975
27	165292	139469	148677	153722	141109	7807	185672	224684	286822	158040	327073	245766	281043	166103
time
0	330319	276022	281854	361190	286903	283132	173427	303764	192927	418531	280153	402630	246853
30	317265	264625	287522	317519	284150	267358	173714	284563	195006	408186	266241	384793	222186
60	306423	256143	268485	321672	285072	258214	177020	265357	195513	384994	275612	378405	228945
90	309826	245351	272150	325058	278951	255749	160675	275014	186924	374650	273625	389953	219527
120	288786	232926	260916	331208	287492	242479	179777	273208	193512	377021	260234	376533	216385
130	19459	20984	11534	25719	13961	235502	170319	246998	191434	329673	260590	368350	211855
160	33046	35741	21153	40278	23729	237905	161768	236613	176854	338064	259754	361795	212038
190	42179	46155	29630	48896	29132	240020	170592	208055	172768	333445	259537	366664	206846
220	50696	48539	35095	50679	33949	239421	172130	219791	168734	315426	256380	346387	200985
250	59410	61873	34617	55333	34608	230224	163384	239144	164207	303635	249050	342095	214819
280	59368	61588	33680	55486	36636	224224	168049	234380	170679	306572	254128	364555	208484
310	61119	63198	36004	67046	38070	211451	172506	214845	167844	312855	236714	349505	207130
320	58665	63289	35838	64198	40027	206056	164676	230623	156047	328546	238962	334802	207226
620	88676	89451	57751	95557	53455	218905	163537	238752	159127	360549	261861	344042	223518
920	98394	108571	62398	110821	75422	214582	177949	280188	142113	348378	279899	341737	210093
1220	110969	123287	82406	139910	80662	193930	183390	268756	171126	371292	282423	355294	226438
1520	112165	151027	88925	131335	107156	168577	187498	275869	172812	395934	260100	342091	226328
1820	128616	133662	126124	137221	109012	194706	204659	284399	174443	401053	288183	330322	192537
2120	125587	141269	119700	119285	110614	190169	206917	272932	177237	415669	269180	324317	203060
2420	123608	125744	119671	120772	131346	201984	237382	286344	168077	381991	270599	289746	162424
2720	145337	134893	127989	108876	120135	195147	221658	263936	168703	363567	260819	269368	195041
3020	150341	143107	125024	99188	118474	193858	232065	263916	169962	370100	251466	273705	179252
3320	149298	145767	123289	117368	108738	220053	220303	282291	168291	345985	258784	273894	179874
3620	151536	108924	131850	120056	125300	203809	225919	271810	155793	306957	262500	264491	186288
3920	160206	134399	144720	130775	124792	195006	222240	257094	168449	305622	245041	267482	156426
4220	169149	117399	139050	138490	134833	191605	233701	279585	161588	327943	259686	266454	168881
4520	157485	131662	140870	145915	133302	177865	216877	279015	150233	319266	237959	273236	158296
	AVERAGE OF PREBLEACH
	310524	255013	274185	331329	284514	261386	172923	280381	192776	392676	271173	386463	226779
NORMALIZED DATA
time	b1	b2	b3	b4	b5	c1	c2	c3	c4	c5	c6	c7	c8	Average of controls
120	1	1	1	1	1	1	1	1	1	1	1	1	1	1
130	0.0626651	0.0822859	0.0420664	0.0776237	0.0490697	0.900973	0.984944	0.880936	0.993036	0.839554	0.960973	0.953132	0.934191	0.930967
160	0.10642	0.140153	0.0771485	0.121565	0.083402	0.910166	0.935494	0.843898	0.917405	0.860923	0.95789	0.93617	0.934998	0.912118
190	0.135832	0.18099	0.108066	0.147575	0.102392	0.918257	0.986522	0.742043	0.896209	0.84916	0.95709	0.948769	0.912103	0.901269
220	0.16326	0.190339	0.127997	0.152957	0.119323	0.915966	0.995416	0.783901	0.875283	0.803272	0.945448	0.896301	0.886259	0.887731
250	0.191322	0.242626	0.126254	0.167003	0.121639	0.88078	0.944839	0.852925	0.8518	0.773245	0.918417	0.885195	0.947261	0.881808
280	0.191187	0.241509	0.122837	0.167465	0.128767	0.857826	0.971816	0.835933	0.885373	0.780724	0.937143	0.943312	0.919326	0.891432
310	0.196825	0.247822	0.131313	0.202355	0.133807	0.808959	0.997591	0.76626	0.870667	0.796725	0.872926	0.904369	0.913355	0.866357
320	0.188923	0.248179	0.130707	0.193759	0.140686	0.78832	0.95231	0.822534	0.809471	0.836684	0.881216	0.866324	0.913779	0.85883
620	0.285569	0.35077	0.210628	0.288405	0.187882	0.837477	0.945724	0.851526	0.825449	0.918184	0.96566	0.890233	0.985619	0.902484
920	0.316865	0.425746	0.227576	0.334474	0.265091	0.820938	1.02907	0.999311	0.737191	0.887189	1.03218	0.884269	0.926421	0.914571
1220	0.357361	0.483453	0.300548	0.422269	0.283508	0.741928	1.06053	0.958538	0.887692	0.945542	1.04149	0.919349	0.998495	0.944195
1520	0.361212	0.592232	0.324324	0.396388	0.376629	0.644934	1.08429	0.983907	0.896438	1.0083	0.959166	0.885185	0.99801	0.932528
1820	0.41419	0.524137	0.459995	0.414153	0.383152	0.744897	1.18353	1.01433	0.904898	1.02133	1.06273	0.854732	0.849006	0.954432
2120	0.404436	0.553967	0.436566	0.360019	0.388783	0.72754	1.19659	0.973432	0.919392	1.05855	0.99265	0.839193	0.895408	0.950345
2420	0.398063	0.493088	0.43646	0.364507	0.461651	0.772741	1.37276	1.02127	0.871875	0.972788	0.997883	0.749738	0.716221	0.93441
2720	0.468038	0.528964	0.466797	0.328603	0.422247	0.746584	1.28183	0.941347	0.875123	0.925869	0.961818	0.697009	0.860048	0.911204
3020	0.484153	0.561174	0.455983	0.299364	0.416409	0.741653	1.34202	0.941276	0.881654	0.942506	0.927327	0.708231	0.790425	0.909386
3320	0.480794	0.571605	0.449656	0.354234	0.382189	0.841869	1.274	1.00681	0.872985	0.881094	0.954313	0.70872	0.793168	0.91662
3620	0.488001	0.42713	0.480879	0.362346	0.440401	0.779723	1.30647	0.96943	0.808154	0.781705	0.968017	0.684389	0.821451	0.889918
3920	0.515922	0.527027	0.527818	0.394698	0.438615	0.746045	1.2852	0.916945	0.873805	0.778305	0.903633	0.692129	0.689772	0.860729
4220	0.544722	0.460364	0.507139	0.417983	0.473907	0.733034	1.35148	0.99716	0.838215	0.835148	0.95764	0.689469	0.744694	0.893354
4520	0.507159	0.516294	0.513776	0.440393	0.468526	0.680468	1.25419	0.995127	0.779312	0.813051	0.877517	0.707018	0.698018	0.850587
CORRECTED DATA
Time	b1	b2	b3	b4	b5
120	1	1	1	1	1
130	0.0673118	0.0883875	0.0451857	0.0833796	0.0527083
160	0.116674	0.153657	0.0845818	0.133278	0.0914377
190	0.150712	0.200817	0.119904	0.163742	0.113609
220	0.183907	0.214411	0.144185	0.172301	0.134413
250	0.216966	0.275147	0.143176	0.189387	0.137943
280	0.214471	0.270922	0.137797	0.18786	0.14445
310	0.227188	0.286051	0.151569	0.23357	0.154448
320	0.219977	0.288974	0.152192	0.225608	0.163811
620	0.316426	0.388672	0.233386	0.319568	0.208183
920	0.346463	0.465515	0.248834	0.365717	0.289853
1220	0.378482	0.512027	0.318312	0.447226	0.300265
1520	0.387347	0.635082	0.34779	0.425068	0.403879
1820	0.433966	0.549162	0.481957	0.433926	0.401445
2120	0.425568	0.582912	0.459376	0.37883	0.409097
2420	0.426005	0.5277	0.467097	0.390094	0.494056
2720	0.513648	0.580511	0.512286	0.360626	0.463395
3020	0.532395	0.617092	0.501419	0.329193	0.457901
3320	0.524529	0.623601	0.490558	0.386456	0.416955
3620	0.548367	0.479966	0.540363	0.407168	0.494878
3920	0.599401	0.612303	0.613222	0.458562	0.509586
4220	0.609748	0.515321	0.567679	0.46788	0.53048
4520	0.596246	0.606986	0.604026	0.517751	0.550827
	Normalize the bouton fluorescent right after bleaching to 0
Recovery Time_(sec)	b1	b2	b3	b4	b5
0	0	0	0	0	0
30	0.0529243	0.071598	0.0412604	0.0544369	0.0408844
60	0.0894188	0.123331	0.0782539	0.087672	0.0642893
90	0.125009	0.138242	0.103684	0.0970097	0.0862512
120	0.160454	0.204867	0.102628	0.11565	0.0899772
150	0.15778	0.200233	0.096994	0.113985	0.0968461
180	0.171414	0.216829	0.111418	0.163852	0.107401
190	0.163683	0.220034	0.112071	0.155166	0.117285
490	0.267092	0.329399	0.197107	0.257673	0.164126
790	0.299297	0.413693	0.213285	0.30802	0.25034
1090	0.333627	0.464714	0.286052	0.396943	0.261331
1390	0.343132	0.5997	0.316925	0.37277	0.37071
1690	0.393115	0.505449	0.457442	0.382434	0.368141
1990	0.384111	0.542472	0.433792	0.322326	0.376218
2290	0.38458	0.481907	0.441878	0.334614	0.465905
2590	0.478548	0.539839	0.489206	0.302465	0.433537
2890	0.498648	0.579966	0.477824	0.268174	0.427738
3190	0.490215	0.587107	0.46645	0.330646	0.384514
3490	0.515772	0.429545	0.518611	0.353242	0.466772
3790	0.57049	0.574713	0.594918	0.409311	0.482299
4090	0.581584	0.468328	0.54722	0.419476	0.504356
4390	0.567107	0.56888	0.585287	0.473884	0.525834

## Sheet: WT 15sept F1
time	b1	b2	b3	b4	b5	background	c1	c2	c3	c4	c5	c6	c7	c8
0	296958	345300	371606	361389	339845	8963	356293	138847	242401	153906	264645	201882	241653	128674
30	303066	315407	352971	378099	337864	9229	373355	133191	254692	145432	257102	191619	263185	115565
60	280357	318459	337815	380285	353589	9078	336066	128726	247732	138062	252615	187422	264160	117124
90	287861	313051	357129	381176	326051	9154	325267	129564	256960	148392	250102	194013	290144	118240
120	293903	300443	360510	361963	329727	8964	366352	120823	244980	143947	242023	199304	295221	120324
130	41919	54262	48081	33900	41331	8743	351450	112470	237675	150329	217663	180471	276859	120564
160	53915	78729	61043	45018	52142	9732	352737	116744	236828	157363	232770	177269	280011	123964
190	61206	90394	63457	50908	55535	7632	345007	126002	233484	151077	236352	190671	271709	126590
220	61180	94311	67542	55742	62214	8448	368398	129815	242764	151985	230064	205464	297032	124390
250	65073	95816	75481	54318	62394	8814	358021	125144	225269	139302	227567	199258	260109	123539
280	68555	96990	85718	56794	63826	8524	348503	130755	219725	147252	239097	208635	275163	123323
310	67564	99102	82271	61194	63358	8833	379869	124727	229207	151560	235646	207226	291441	127698
320	71098	101986	85990	60426	61583	8809	372803	126914	232100	150163	236580	210092	287252	123572
620	87279	115364	102961	64746	75624	9184	392486	122972	238973	168615	239411	208609	219739	136953
920	101441	130810	99296	72659	85816	7891	346242	123934	247615	164380	225597	189743	231180	129642
1220	119806	129466	110664	68003	86935	9065	339365	139485	245393	156210	200043	187782	245473	116197
1520	125241	151946	123904	77894	98541	8326	304478	141745	263430	153470	212416	183401	279984	107726
1820	131434	154548	118587	90892	97991	8841	355945	149048	245321	152267	224812	185400	327609	119435
2120	134753	160686	155468	94355	111895	9201	375933	159404	223248	163613	235103	200029	368243	144294
2420	126786	169311	154681	80802	121318	9070	371148	151773	262305	168055	259891	212351	366376	150202
2720	128416	185812	160719	87548	122819	9409	399826	155632	222670	169108	264729	202541	283139	136643
3020	138624	185581	157753	107238	123436	9460	370922	146667	255745	172848	269667	197220	297680	141221
3320	148190	188840	171645	131885	132332	8860	398001	137857	258385	187098	274577	209631	304428	138288
3620	145709	204145	204159	138366	122853	10108	368877	135975	254406	201983	254484	189730	278866	141148
3920	151842	210392	190279	140939	144080	9692	375502	141848	288159	193439	282707	199141	264081	145129
4220	169537	204998	193877	151721	137343	10232	372578	151483	290231	190676	274176	212639	231165	149407
4520	171409	239949	184552	161490	131440	10178	337805	154895	292486	190302	273672	207726	226458	139292
time
0	287995	336337	362643	352426	330882	347330	129884	233438	144943	255682	192919	232690	119711
30	293837	306178	343742	368870	328635	364126	123962	245463	136203	247873	182390	253956	106336
60	271279	309381	328737	371207	344511	326988	119648	238654	128984	243537	178344	255082	108046
90	278707	303897	347975	372022	316897	316113	120410	247806	139238	240948	184859	280990	109086
120	284939	291479	351546	352999	320763	357388	111859	236016	134983	233059	190340	286257	111360
130	33176	45519	39338	25157	32588	342707	103727	228932	141586	208920	171728	268116	111821
160	44183	68997	51311	35286	42410	343005	107012	227096	147631	223038	167537	270279	114232
190	53574	82762	55825	43276	47903	337375	118370	225852	143445	228720	183039	264077	118958
220	52732	85863	59094	47294	53766	359950	121367	234316	143537	221616	197016	288584	115942
250	56259	87002	66667	45504	53580	349207	116330	216455	130488	218753	190444	251295	114725
280	60031	88466	77194	48270	55302	339979	122231	211201	138728	230573	200111	266639	114799
310	58731	90269	73438	52361	54525	371036	115894	220374	142727	226813	198393	282608	118865
320	62289	93177	77181	51617	52774	363994	118105	223291	141354	227771	201283	278443	114763
620	78095	106180	93777	55562	66440	383302	113788	229789	159431	230227	199425	210555	127769
920	93550	122919	91405	64768	77925	338351	116043	239724	156489	217706	181852	223289	121751
1220	110741	120401	101599	58938	77870	330300	130420	236328	147145	190978	178717	236408	107132
1520	116915	143620	115578	69568	90215	296152	133419	255104	145144	204090	175075	271658	99400
1820	122593	145707	109746	82051	89150	347104	140207	236480	143426	215971	176559	318768	110594
2120	125552	151485	146267	85154	102694	366732	150203	214047	154412	225902	190828	359042	135093
2420	117716	160241	145611	71732	112248	362078	142703	253235	158985	250821	203281	357306	141132
2720	119007	176403	151310	78139	113410	390417	146223	213261	159699	255320	193132	273730	127234
3020	129164	176121	148293	97778	113976	361462	137207	246285	163388	260207	187760	288220	131761
3320	139330	179980	162785	123025	123472	389141	128997	249525	178238	265717	200771	295568	129428
3620	135601	194037	194051	128258	112745	358769	125867	244298	191875	244376	179622	268758	131040
3920	142150	200700	180587	131247	134388	365810	132156	278467	183747	273015	189449	254389	135437
4220	159305	194766	183645	141489	127111	362346	141251	279999	180444	263944	202407	220933	139175
4520	161231	229771	174374	151312	121262	327627	144717	282308	180124	263494	197548	216280	129114
	AVERAGE OF PREBLEACH
	283351	309454	346929	363505	328338	342389	121153	240275	136870	244220	185770	261795	110908
NORMALIZED DATA
time	b1	b2	b3	b4	b5	c1	c2	c3	c4	c5	c6	c7	c8	Average of controls
120	1	1	1	1	1	1	1	1	1	1	1	1	1	1
130	0.117084	0.147094	0.113389	0.0692068	0.0992515	1.00093	0.856168	0.95279	1.03445	0.855459	0.92441	1.02414	1.00823	0.957074
160	0.15593	0.222963	0.147901	0.0970716	0.129166	1.0018	0.883283	0.945149	1.07862	0.913267	0.90185	1.03241	1.02997	0.973294
190	0.189073	0.267445	0.160912	0.119052	0.145896	0.985356	0.977032	0.939971	1.04804	0.936533	0.985297	1.00872	1.07258	0.994191
220	0.186101	0.277466	0.170335	0.130106	0.163752	1.05129	1.00177	0.975198	1.04871	0.907445	1.06053	1.10233	1.04539	1.02408
250	0.198549	0.281146	0.192163	0.125181	0.163186	1.01991	0.960194	0.900862	0.95337	0.895722	1.02516	0.959892	1.03442	0.968691
280	0.211861	0.285877	0.222507	0.132791	0.16843	0.992961	1.0089	0.878996	1.01357	0.944121	1.0772	1.0185	1.03508	0.996167
310	0.207273	0.291704	0.21168	0.144045	0.166064	1.08367	0.956595	0.917173	1.04279	0.928725	1.06795	1.0795	1.07175	1.01852
320	0.21983	0.301101	0.222469	0.141998	0.160731	1.0631	0.974845	0.929313	1.03276	0.932648	1.0835	1.06359	1.03476	1.01432
620	0.275612	0.34312	0.270306	0.152851	0.202353	1.11949	0.939212	0.956357	1.16483	0.942704	1.0735	0.804274	1.15203	1.01905
920	0.330155	0.397212	0.263469	0.178176	0.237332	0.988206	0.957825	0.997705	1.14334	0.891435	0.978907	0.852915	1.09777	0.988513
1220	0.390826	0.389075	0.292853	0.162138	0.237164	0.964692	1.07649	0.983571	1.07507	0.781992	0.962032	0.903027	0.965956	0.964104
1520	0.412615	0.464107	0.333146	0.191381	0.274763	0.864958	1.10125	1.06172	1.06045	0.835682	0.942427	1.03767	0.89624	0.975049
1820	0.432654	0.470851	0.316336	0.225722	0.271519	1.01377	1.15728	0.984204	1.0479	0.88433	0.950415	1.21762	0.997171	1.03159
2120	0.443096	0.489523	0.421605	0.234258	0.31277	1.0711	1.23978	0.89084	1.12816	0.924995	1.02723	1.37146	1.21807	1.10895
2420	0.415442	0.517818	0.419715	0.197334	0.341868	1.0575	1.17788	1.05394	1.16157	1.02703	1.09426	1.36483	1.27252	1.15119
2720	0.419998	0.570045	0.436142	0.21496	0.345407	1.14027	1.20693	0.887569	1.16679	1.04545	1.03963	1.04559	1.14721	1.08493
3020	0.455844	0.569134	0.427445	0.268987	0.347131	1.05571	1.13251	1.02501	1.19374	1.06546	1.01071	1.10094	1.18802	1.09651
3320	0.491722	0.581604	0.469218	0.338441	0.376052	1.13655	1.06475	1.0385	1.30224	1.08802	1.08075	1.12901	1.16699	1.12585
3620	0.478561	0.627029	0.55934	0.352837	0.343381	1.04784	1.03891	1.01674	1.40188	1.00064	0.966903	1.0266	1.18152	1.08513
3920	0.501674	0.648561	0.520531	0.36106	0.409298	1.0684	1.09082	1.15895	1.34249	1.11791	1.0198	0.971711	1.22117	1.12391
4220	0.562217	0.629385	0.529345	0.389236	0.387135	1.05829	1.16589	1.16533	1.31836	1.08076	1.08955	0.843916	1.25487	1.12212
4520	0.569014	0.742504	0.502622	0.416259	0.369321	0.956885	1.1945	1.17494	1.31602	1.07892	1.0634	0.826143	1.16416	1.09687
CORRECTED DATA
Time	b1	b2	b3	b4	b5
120	1	1	1	1	1
130	0.122336	0.153692	0.118475	0.0723108	0.103703
160	0.160209	0.229081	0.151959	0.0997352	0.13271
190	0.190177	0.269008	0.161852	0.119748	0.146748
220	0.181725	0.270941	0.166329	0.127046	0.159901
250	0.204966	0.290233	0.198374	0.129227	0.16846
280	0.212676	0.286977	0.223363	0.133301	0.169078
310	0.203504	0.2864	0.207832	0.141426	0.163045
320	0.216727	0.296851	0.21933	0.139994	0.158462
620	0.270459	0.336706	0.265253	0.149993	0.19857
920	0.333992	0.401828	0.266531	0.180247	0.24009
1220	0.405377	0.403561	0.303756	0.168175	0.245995
1520	0.423173	0.475983	0.341671	0.196279	0.281794
1820	0.419406	0.456434	0.30665	0.218811	0.263206
2120	0.399562	0.441428	0.380183	0.211243	0.28204
2420	0.36088	0.44981	0.364592	0.171418	0.296969
2720	0.38712	0.525421	0.402	0.198133	0.318368
3020	0.415721	0.51904	0.389822	0.245311	0.316577
3320	0.436756	0.516591	0.416768	0.30061	0.334016
3620	0.441018	0.577839	0.515459	0.325157	0.316443
3920	0.446366	0.577059	0.463144	0.321254	0.364175
4220	0.501031	0.560889	0.471736	0.346875	0.345003
4520	0.518762	0.676929	0.458233	0.379497	0.336704
	Normalize the bouton fluorescent right after bleaching to 0
Recovery Time_(sec)	b1	b2	b3	b4	b5
0	0	0	0	0	0
30	0.043152	0.0890804	0.0379842	0.029562	0.0323632
60	0.077298	0.136258	0.0492071	0.0511344	0.0480253
90	0.067667	0.138542	0.0542855	0.0590015	0.0627004
120	0.0941477	0.161338	0.0906376	0.061353	0.0722494
150	0.102932	0.157491	0.118985	0.0657447	0.0729393
180	0.0924823	0.156808	0.101366	0.0745024	0.0662073
190	0.107548	0.169158	0.114409	0.072959	0.0610952
490	0.16877	0.21625	0.166505	0.0837376	0.105843
790	0.241159	0.293198	0.167954	0.116349	0.152167
1090	0.322494	0.295247	0.210183	0.103336	0.158755
1390	0.342771	0.380821	0.253193	0.133631	0.198696
1690	0.338478	0.357721	0.213465	0.157919	0.177957
1990	0.315869	0.339989	0.296881	0.149761	0.198971
2290	0.271794	0.349894	0.279194	0.106832	0.215626
2590	0.301692	0.439236	0.32163	0.135629	0.239502
2890	0.33428	0.431696	0.307816	0.186485	0.237503
3190	0.358247	0.428803	0.338382	0.246094	0.256961
3490	0.363102	0.501173	0.450338	0.272555	0.237354
3790	0.369196	0.500252	0.390992	0.268348	0.290608
4090	0.43148	0.481145	0.400739	0.295965	0.269219
4390	0.451683	0.618259	0.385421	0.33113	0.25996

## Sheet: WT 17sept F1
time	b1	b2	b3	b4	b5	background	c1	c2	c3	c4	c5	c6	c7	c8
0	316373	490984	340174	287264	342852	12865	292200	270929	218730	327924	491879	525208	230886	239628
30	332567	465434	332721	270245	361612	13787	278772	266557	226746	301642	511836	505754	222764	220607
60	309940	462436	326483	282617	347550	13258	264504	272666	211393	298011	496543	508187	231575	232808
90	292249	423421	324802	258603	328407	12940	258078	275927	214106	310494	462274	513171	214330	226120
120	297645	437544	327113	256927	343984	13548	252842	253058	209942	310564	453902	489318	213129	208294
130	44941	38606	33543	18525	33276	12771	255487	248612	201091	299502	444109	455581	201438	205490
160	58840	49567	48557	26506	45813	12773	258879	265518	178442	282319	423794	466033	198052	203112
190	65245	55804	54633	26949	47025	12766	262995	258788	137623	297940	449827	461451	189698	205829
220	63795	56750	55264	31678	54095	12987	247118	257514	162784	282285	430768	450258	192997	198690
250	85460	58654	63611	31253	57435	13294	234217	236441	162289	281133	437296	452571	190531	192705
280	81768	62924	63074	33109	58381	12547	240740	257823	151518	280244	432435	438757	189108	185641
310	77563	61777	66821	33166	65438	12994	245284	247561	159902	267730	415903	427821	189730	176619
320	75738	62497	67211	32700	63525	12517	247522	247480	159842	257180	418299	428460	188998	170491
620	88677	74390	85555	38905	78298	13075	241721	240223	193186	309788	418533	427490	189963	180791
920	100573	81554	105816	37396	80740	13731	258087	253478	185812	342397	427393	449898	174515	181798
1220	101911	89012	114096	32899	101770	13626	289427	246566	204211	334624	409355	414201	168033	175500
1520	109546	90261	113803	32811	101557	12528	286823	235196	208768	342008	402947	421777	174686	172680
1820	120134	100375	118979	38748	105192	12867	294695	234144	202279	345627	398659	421967	188371	177001
2120	122783	109117	128341	34725	107472	13004	305221	241092	203780	353385	406883	451752	184996	186956
2420	132610	112137	135115	38493	135479	12760	289743	241493	194200	382457	413775	437668	188775	177407
2720	136017	119530	139638	35747	134202	12986	280098	236691	158426	405646	413282	468740	197331	190918
3020	154668	134810	142550	35231	146368	12471	345196	243977	204545	365455	427738	466899	189232	182036
3320	146036	146801	161089	42359	169717	13399	336169	251487	222286	416298	446107	490026	192588	199819
3620	143430	151455	163241	40595	162261	12692	348917	260936	233337	427599	442046	485826	209737	173496
3920	136795	163248	156317	40454	183540	12905	330866	251246	195451	415369	406513	477308	226243	162658
4220	149113	189988	169458	37808	187917	13311	361795	285557	225621	444868	448742	457276	203178	177333
4520	133257	182725	141687	37354	186800	13368	378079	260453	219427	441844	411382	463976	210225	191546
time
0	303508	478119	327309	274399	329987	279335	258064	205865	315059	479014	512343	218021	226763
30	318780	451647	318934	256458	347825	264985	252770	212959	287855	498049	491967	208977	206820
60	296682	449178	313225	269359	334292	251246	259408	198135	284753	483285	494929	218317	219550
90	279309	410481	311862	245663	315467	245138	262987	201166	297554	449334	500231	201390	213180
120	284097	423996	313565	243379	330436	239294	239510	196394	297016	440354	475770	199581	194746
130	32170	25835	20772	5754	20505	242716	235841	188320	286731	431338	442810	188667	192719
160	46067	36794	35784	13733	33040	246106	252745	165669	269546	411021	453260	185279	190339
190	52479	43038	41867	14183	34259	250229	246022	124857	285174	437061	448685	176932	193063
220	50808	43763	42277	18691	41108	234131	244527	149797	269298	417781	437271	180010	185703
250	72166	45360	50317	17959	44141	220923	223147	148995	267839	424002	439277	177237	179411
280	69221	50377	50527	20562	45834	228193	245276	138971	267697	419888	426210	176561	173094
310	64569	48783	53827	20172	52444	232290	234567	146908	254736	402909	414827	176736	163625
320	63221	49980	54694	20183	51008	235005	234963	147325	244663	405782	415943	176481	157974
620	75602	61315	72480	25830	65223	228646	227148	180111	296713	405458	414415	176888	167716
920	86842	67823	92085	23665	67009	244356	239747	172081	328666	413662	436167	160784	168067
1220	88285	75386	100470	19273	88144	275801	232940	190585	320998	395729	400575	154407	161874
1520	97018	77733	101275	20283	89029	274295	222668	196240	329480	390419	409249	162158	160152
1820	107267	87508	106112	25881	92325	281828	221277	189412	332760	385792	409100	175504	164134
2120	109779	96113	115337	21721	94468	292217	228088	190776	340381	393879	438748	171992	173952
2420	119850	99377	122355	25733	122719	276983	228733	181440	369697	401015	424908	176015	164647
2720	123031	106544	126652	22761	121216	267112	223705	145440	392660	400296	455754	184345	177932
3020	142197	122339	130079	22760	133897	332725	231506	192074	352984	415267	454428	176761	169565
3320	132637	133402	147690	28960	156318	322770	238088	208887	402899	432708	476627	179189	186420
3620	130738	138763	150549	27903	149569	336225	248244	220645	414907	429354	473134	197045	160804
3920	123890	150343	143412	27549	170635	317961	238341	182546	402464	393608	464403	213338	149753
4220	135802	176677	156147	24497	174606	348484	272246	212310	431557	435431	443965	189867	164022
4520	119889	169357	128319	23986	173432	364711	247085	206059	428476	398014	450608	196857	178178
	AVERAGE OF PREBLEACH
	296475	442684	316979	257852	331601	256000	254548	202904	296447	470007	495048	209257	212212
NORMALIZED DATA
time	b1	b2	b3	b4	b5	c1	c2	c3	c4	c5	c6	c7	c8	Average of controls
120	1	1	1	1	1	1	1	1	1	1	1	1	1	1
130	0.108508	0.0583599	0.0655312	0.0223152	0.0618363	0.948111	0.92651	0.928125	0.967224	0.917726	0.894479	0.901603	0.908145	0.92399
160	0.155382	0.0831157	0.112891	0.0532593	0.0996377	0.961353	0.992918	0.81649	0.909254	0.874499	0.915588	0.885413	0.896929	0.906556
190	0.17701	0.0972205	0.132081	0.0550045	0.103314	0.977459	0.966506	0.615351	0.961972	0.929903	0.906346	0.845524	0.909766	0.889103
220	0.171374	0.0988583	0.133375	0.0724874	0.123968	0.914576	0.960633	0.738266	0.908417	0.888882	0.88329	0.860233	0.875083	0.878673
250	0.243413	0.102466	0.158739	0.0696486	0.133115	0.862982	0.876641	0.734314	0.903496	0.902118	0.887342	0.846982	0.845434	0.857413
280	0.23348	0.113799	0.159402	0.0797435	0.13822	0.89138	0.963575	0.684911	0.903017	0.893365	0.860947	0.843751	0.815666	0.857077
310	0.217789	0.110198	0.169813	0.078231	0.158154	0.907384	0.921505	0.724028	0.859296	0.85724	0.837953	0.844587	0.771046	0.84038
320	0.213242	0.112902	0.172548	0.0782737	0.153823	0.91799	0.92306	0.726083	0.825317	0.863353	0.840207	0.843369	0.744417	0.835474
620	0.255003	0.138507	0.228659	0.100174	0.196691	0.89315	0.892359	0.887667	1.0009	0.862663	0.837121	0.845314	0.790324	0.876187
920	0.292915	0.153209	0.290508	0.0917776	0.202077	0.954517	0.941855	0.848092	1.10868	0.880118	0.88106	0.768356	0.791978	0.896832
1220	0.297782	0.170293	0.316961	0.0747445	0.265813	1.07735	0.915113	0.939287	1.08282	0.841964	0.809164	0.737881	0.762795	0.895796
1520	0.327238	0.175595	0.319501	0.0786615	0.268482	1.07147	0.874759	0.967158	1.11143	0.830666	0.826685	0.774922	0.75468	0.901471
1820	0.361808	0.197676	0.33476	0.100372	0.278422	1.10089	0.869294	0.933506	1.12249	0.820821	0.826385	0.8387	0.773444	0.910692
2120	0.370281	0.217114	0.363863	0.0842384	0.284884	1.14147	0.896052	0.940229	1.1482	0.838028	0.886274	0.821917	0.819709	0.936485
2420	0.40425	0.224487	0.386003	0.0997977	0.37008	1.08197	0.898586	0.894217	1.24709	0.85321	0.858317	0.841142	0.775862	0.931299
2720	0.414979	0.240677	0.39956	0.0882717	0.365547	1.04341	0.878833	0.716793	1.32455	0.851681	0.920626	0.880949	0.838464	0.931913
3020	0.479625	0.276357	0.410371	0.0882678	0.403789	1.29971	0.909479	0.946626	1.19071	0.883533	0.917947	0.844707	0.799037	0.973969
3320	0.44738	0.301348	0.46593	0.112313	0.471403	1.26082	0.935337	1.02949	1.35909	0.920641	0.962789	0.85631	0.878462	1.02537
3620	0.440974	0.313458	0.474949	0.108213	0.451051	1.31338	0.975235	1.08744	1.3996	0.913505	0.955734	0.94164	0.757752	1.04304
3920	0.417876	0.339617	0.452434	0.106841	0.514579	1.24204	0.936331	0.899668	1.35762	0.837451	0.938097	1.0195	0.705677	0.992048
4220	0.458055	0.399104	0.49261	0.0950043	0.526554	1.36127	1.06953	1.04636	1.45576	0.926435	0.896812	0.907338	0.772916	1.05455
4520	0.404381	0.382568	0.404819	0.0930225	0.523013	1.42465	0.970682	1.01555	1.44537	0.846825	0.910231	0.940742	0.839623	1.04921
CORRECTED DATA
Time	b1	b2	b3	b4	b5			Filter out due to large abrupt change or wrong targeting.
120	1	1	1	1	1
130	0.117434	0.0631607	0.0709219	0.0241509	0.0669231
160	0.171399	0.0916829	0.124527	0.0587491	0.109908
190	0.199088	0.109347	0.148556	0.0618652	0.1162
220	0.195037	0.112509	0.151791	0.0824965	0.141086
250	0.283893	0.119506	0.185137	0.081231	0.155251
280	0.272414	0.132776	0.185983	0.0930413	0.161269
310	0.259155	0.131129	0.202066	0.0930901	0.188193
320	0.255235	0.135135	0.206527	0.0936877	0.184115
620	0.291037	0.15808	0.26097	0.114329	0.224485
920	0.326611	0.170833	0.323927	0.102335	0.225323
1220	0.332422	0.190102	0.353832	0.0834392	0.296734
1520	0.363005	0.194787	0.354422	0.0872591	0.297827
1820	0.397289	0.217061	0.367589	0.110215	0.305725
2120	0.395394	0.231839	0.388541	0.0899516	0.304206
2420	0.434071	0.241048	0.414479	0.10716	0.39738
2720	0.445298	0.258261	0.428752	0.0947209	0.392255
3020	0.492444	0.283743	0.421339	0.0906269	0.414581
3320	0.436312	0.293893	0.454403	0.109534	0.459741
3620	0.42278	0.300525	0.455353	0.103749	0.43244
3920	0.421226	0.342339	0.45606	0.107697	0.518703
4220	0.43436	0.378458	0.467127	0.0900897	0.499315
4520	0.385415	0.364625	0.385832	0.0886596	0.498483
	Normalize the bouton fluorescent right after bleaching to 0
Recovery Time_(sec)	b1	b2	b3	b4	b5
0	0	0	0	0	0
30	0.0611446	0.0304452	0.0576972	0.0354545	0.0460679
60	0.0925184	0.0492998	0.08356	0.0386477	0.0528112
90	0.0879282	0.052675	0.0870425	0.0597896	0.0794818
120	0.188607	0.0601437	0.122934	0.0584928	0.0946635
150	0.175602	0.0743083	0.123844	0.0705954	0.101113
180	0.160578	0.0725506	0.141155	0.0706454	0.129968
190	0.156136	0.0768271	0.145956	0.0712578	0.125597
490	0.196702	0.101318	0.204556	0.0924103	0.168863
790	0.237009	0.114931	0.272318	0.0801194	0.169761
1090	0.243594	0.1355	0.304506	0.0607557	0.246293
1390	0.278246	0.1405	0.305141	0.0646701	0.247465
1690	0.317092	0.164276	0.319313	0.0881938	0.25593
1990	0.314945	0.180051	0.341865	0.0674292	0.254301
2290	0.358768	0.18988	0.369782	0.0850632	0.354159
2590	0.371489	0.208254	0.385145	0.0723166	0.348665
2890	0.424909	0.235454	0.377166	0.0681213	0.372593
3190	0.361307	0.246288	0.412754	0.0874963	0.420992
3490	0.345975	0.253367	0.413777	0.0815676	0.391733
3790	0.344214	0.298	0.414538	0.0856137	0.484183
4090	0.359096	0.336554	0.42645	0.0675707	0.463404
4390	0.303638	0.321789	0.338949	0.0661052	0.462513

## Sheet: WT 17sept F2
time	b1	b2	b3	b4	b5	background	c1	c2	c3	c4	c5	c6	c7	c8
1	353297	344745	253730	323075	382058	13590	238641	569674	262708	248471	310172	351857	255948	195446
2	353665	366764	254169	317113	366897	14210	244406	560029	241614	241471	296693	360373	249346	195135
3	355059	337345	243563	285141	367514	14668	232990	542650	239778	235433	292301	358090	249760	192758
4	358554	317838	247272	294019	357767	13834	232166	539205	244789	243023	295778	381448	255399	182605
5	343428	322045	236914	290190	357016	13902	227394	510193	248690	246150	295242	360424	231381	180032
6	30098	37599	41208	32209	47005	13597	229082	520676	236196	239842	295438	356064	239327	173308
7	42226	48657	51340	41624	62999	14426	227605	515350	241009	236675	282709	353671	249281	169955
8	48273	71508	64730	47146	71329	13054	226244	495551	241473	230814	275342	354951	247874	168982
9	51807	81214	66886	49080	78808	13690	233234	504922	234009	227193	297538	346294	252303	165316
10	61082	74038	69359	53013	77592	13850	217716	490966	236336	224965	286237	342430	262421	165988
11	91715	87131	74919	56218	79402	13532	215951	509628	220224	206937	267491	331947	246949	170000
12	90214	89276	78251	58247	81925	13982	216267	518645	232723	222951	283185	315834	246569	173630
13	90010	86796	80938	56476	81097	14108	216826	499614	219711	204580	272871	302219	241416	164694
14	129428	118316	113532	86978	105285	13813	235724	523860	241491	244702	316715	272940	253519	195181
15	229069	135505	105370	128454	112520	14910	237405	534718	239272	226365	331651	303063	252162	207000
16	204287	149177	118485	150256	89447	14026	225050	525247	220789	232009	334510	332654	251449	216095
17	147837	104747	145205	156517	106135	14916	265013	539183	238460	221568	328983	323466	251696	210362
18	208736	129476	152354	168912	110930	13419	294791	531031	226613	223495	333426	362362	269626	236177
19	225932	116310	141195	191835	106860	13749	271590	523544	220558	249830	322188	364610	265158	228560
20	222625	118822	142723	198358	115120	14824	251852	562393	210224	224160	324921	329334	212607	234442
21	184989	110825	152640	210533	126502	14280	262903	537999	240622	238191	333372	331844	228517	236170
22	207321	92301	151104	209736	131431	14167	248936	575177	236754	249975	363707	378408	240601	283335
23	186654	107935	155555	218268	133138	13147	227718	563009	219568	236574	348187	328674	226077	279645
24	165082	102068	166024	198310	127207	13834	234638	549458	202087	236215	316593	336911	244238	248087
25	237931	146310	168700	214335	127507	14278	222133	542303	220964	228216	330259	321021	245513	252843
26	266648	84287	168827	225000	127530	13841	190678	565033	221459	241305	339423	355970	249235	261054
27	280389	100592	171592	235840	137833	20024	207041	572952	226517	256626	357237	314255	222042	256196
time
0	339707	331155	240140	309485	368468	225051	556084	249118	234881	296582	338267	242358	181856
30	339455	352554	239959	302903	352687	230196	545819	227404	227261	282483	346163	235136	180925
60	340391	322677	228895	270473	352846	218322	527982	225110	220765	277633	343422	235092	178090
90	344720	304004	233438	280185	343933	218332	525371	230955	229189	281944	367614	241565	168771
120	329526	308143	223012	276288	343114	213492	496291	234788	232248	281340	346522	217479	166130
130	16501	24002	27611	18612	33408	215485	507079	222599	226245	281841	342467	225730	159711
160	27800	34231	36914	27198	48573	213179	500924	226583	222249	268283	339245	234855	155529
190	35219	58454	51676	34092	58275	213190	482497	228419	217760	262288	341897	234820	155928
220	38117	67524	53196	35390	65118	219544	491232	220319	213503	283848	332604	238613	151626
250	47232	60188	55509	39163	63742	203866	477116	222486	211115	272387	328580	248571	152138
280	78183	73599	61387	42686	65870	202419	496096	206692	193405	253959	318415	233417	156468
310	76232	75294	64269	44265	67943	202285	504663	218741	208969	269203	301852	232587	159648
320	75902	72688	66830	42368	66989	202718	485506	205603	190472	258763	288111	227308	150586
620	115615	104503	99719	73165	91472	221911	510047	227678	230889	302902	259127	239706	181368
920	214159	120595	90460	113544	97610	222495	519808	224362	211455	316741	288153	237252	192090
1220	190261	135151	104459	136230	75421	211024	511221	206763	217983	320484	318628	237423	202069
1520	132921	89831	130289	141601	91219	250097	524267	223544	206652	314067	308550	236780	195446
1820	195317	116057	138935	155493	97511	281372	517612	213194	210076	320007	348943	256207	222758
2120	212183	102561	127446	178086	93111	257841	509795	206809	236081	308439	350861	251409	214811
2420	207801	103998	127899	183534	100296	237028	547569	195400	209336	310097	314510	197783	219618
2720	170709	96545	138360	196253	112222	248623	523719	226342	223911	319092	317564	214237	221890
3020	193154	78134	136937	195569	117264	234769	561010	222587	235808	349540	364241	226434	269168
3320	173507	94788	142408	205121	119991	214571	549862	206421	223427	335040	315527	212930	266498
3620	151248	88234	152190	184476	113373	220804	535624	188253	222381	302759	323077	230404	234253
3920	223653	132032	154422	200057	113229	207855	528025	206686	213938	315981	306743	231235	238565
4220	252807	70446	154986	211159	113689	176837	551192	207618	227464	325582	342129	235394	247213
4520	260365	80568	151568	215816	117809	187017	552928	206493	236602	337213	294231	202018	236172
	AVERAGE OF PREBLEACH
	338760	323707	233089	287867	352210	221079	530309	233475	228869	283996	348398	234326	175154
NORMALIZED DATA
time	b1	b2	b3	b4	b5	c1	c2	c3	c4	c5	c6	c7	c8	Average of controls
120	1	1	1	1	1	1	1	1	1	1	1	1	1	1
130	0.04871	0.0741474	0.118457	0.0646549	0.0948526	0.974699	0.956195	0.953417	0.988536	0.99241	0.982977	0.963316	0.91183	0.965422
160	0.082064	0.105747	0.158369	0.0944812	0.137909	0.964268	0.944588	0.970481	0.971076	0.94467	0.973729	1.00226	0.887954	0.957378
190	0.103965	0.180577	0.221701	0.11843	0.165455	0.964318	0.909841	0.978345	0.951462	0.923561	0.981341	1.00211	0.890232	0.950151
220	0.112519	0.208596	0.228222	0.122939	0.184884	0.993059	0.926312	0.943651	0.932862	0.999477	0.954668	1.0183	0.865671	0.954249
250	0.139426	0.185934	0.238145	0.136046	0.180977	0.922143	0.899694	0.952933	0.922428	0.959121	0.943118	1.06079	0.868594	0.941103
280	0.230792	0.227363	0.263363	0.148284	0.187019	0.915597	0.935484	0.885285	0.845047	0.894233	0.913941	0.996121	0.893315	0.909878
310	0.225033	0.2326	0.275728	0.153769	0.192905	0.914991	0.951639	0.936893	0.913051	0.94791	0.866401	0.992579	0.91147	0.929367
320	0.224058	0.224549	0.286715	0.147179	0.190196	0.91695	0.915515	0.880621	0.832232	0.911149	0.82696	0.97005	0.859733	0.889151
620	0.341289	0.322832	0.427815	0.254163	0.259709	1.00377	0.961791	0.975171	1.00883	1.06657	0.743768	1.02296	1.03547	0.977291
920	0.632185	0.372544	0.388092	0.394432	0.277136	1.00641	0.980198	0.960968	0.923914	1.1153	0.827081	1.01249	1.09669	0.99038
1220	0.56164	0.417511	0.448151	0.47324	0.214137	0.95452	0.964005	0.885589	0.952437	1.12848	0.914553	1.01322	1.15366	0.995808
1520	0.392375	0.277507	0.558967	0.491898	0.258991	1.13126	0.988606	0.957464	0.902928	1.10588	0.885626	1.01047	1.11585	1.01226
1820	0.576565	0.358525	0.59606	0.540156	0.276855	1.27272	0.976057	0.913134	0.917888	1.1268	1.00157	1.09338	1.27178	1.07167
2120	0.626352	0.316833	0.54677	0.61864	0.264362	1.16629	0.961316	0.885786	1.03151	1.08607	1.00707	1.0729	1.22641	1.05467
2420	0.613417	0.321272	0.548714	0.637566	0.284762	1.07214	1.03255	0.83692	0.914655	1.0919	0.902733	0.844051	1.25385	0.993601
2720	0.503923	0.298248	0.593594	0.681749	0.318623	1.12459	0.987573	0.969449	0.978338	1.12358	0.911499	0.914269	1.26683	1.03452
3020	0.57018	0.241373	0.587489	0.679373	0.332938	1.06193	1.05789	0.953365	1.03032	1.23079	1.04548	0.96632	1.53675	1.11035
3320	0.512183	0.292821	0.61096	0.712555	0.340681	0.970564	1.03687	0.884125	0.976223	1.17973	0.905652	0.908691	1.5215	1.04792
3620	0.446476	0.272574	0.652927	0.640838	0.321891	0.998758	1.01002	0.806309	0.971653	1.06607	0.927323	0.983263	1.33741	1.0126
3920	0.660211	0.407876	0.662503	0.694964	0.321482	0.940186	0.995692	0.88526	0.934763	1.11262	0.880439	0.986809	1.36203	1.01222
4220	0.746272	0.217623	0.664923	0.73353	0.322788	0.799883	1.03938	0.889252	0.993862	1.14643	0.982007	1.00456	1.4114	1.03335
4520	0.768583	0.248892	0.650259	0.749708	0.334485	0.84593	1.04265	0.884433	1.03379	1.18738	0.844526	0.862124	1.34836	1.00615
CORRECTED DATA
Time	b1	b2	b3	b4	b5			Filter out due to large abrupt change or wrong targeting.
120	1	1	1	1	1
130	0.0504546	0.0768031	0.1227	0.0669706	0.0982498
160	0.0857175	0.110455	0.165419	0.0986875	0.144049
190	0.109419	0.190051	0.233332	0.124643	0.174136
220	0.117914	0.218597	0.239164	0.128833	0.193748
250	0.148152	0.19757	0.253049	0.14456	0.192304
280	0.253651	0.249883	0.289449	0.162971	0.205543
310	0.242135	0.250277	0.296683	0.165456	0.207566
320	0.251991	0.252543	0.322459	0.165528	0.213908
620	0.34922	0.330334	0.437757	0.260069	0.265744
920	0.638326	0.376163	0.391862	0.398264	0.279828
1220	0.564004	0.419268	0.450038	0.475232	0.215038
1520	0.387623	0.274146	0.552197	0.48594	0.255854
1820	0.538008	0.334549	0.5562	0.504034	0.258341
2120	0.593885	0.30041	0.518428	0.586573	0.250659
2420	0.617368	0.323342	0.552248	0.641672	0.286596
2720	0.487111	0.288298	0.573789	0.659004	0.307992
3020	0.513512	0.217384	0.5291	0.611853	0.299849
3320	0.488761	0.27943	0.583022	0.679971	0.325102
3620	0.44092	0.269182	0.644802	0.632864	0.317885
3920	0.652238	0.40295	0.654502	0.686571	0.317599
4220	0.72219	0.2106	0.643465	0.709859	0.312371
4520	0.763885	0.247371	0.646284	0.745125	0.332441
	Normalize the bouton fluorescent right after bleaching to 0
Recovery Time_(sec)	b1	b2	b3	b4	b5
0	0	0	0	0	0
30	0.0371366	0.0364513	0.0486944	0.0339934	0.0507892
60	0.0620974	0.122669	0.126106	0.0618121	0.0841543
90	0.0710437	0.15359	0.132753	0.0663027	0.105903
120	0.102889	0.130814	0.14858	0.0831583	0.104301
150	0.213994	0.187479	0.190071	0.102891	0.118984
180	0.201866	0.187906	0.198317	0.105554	0.121227
190	0.212246	0.19036	0.227698	0.105631	0.128259
490	0.31464	0.274623	0.359121	0.206958	0.185743
790	0.619108	0.324264	0.306808	0.355072	0.201362
1090	0.540837	0.370956	0.37312	0.437565	0.129513
1390	0.355084	0.213761	0.489567	0.449041	0.174775
1690	0.51346	0.279189	0.49413	0.468435	0.177534
1990	0.572306	0.24221	0.451075	0.556898	0.169015
2290	0.597036	0.267049	0.489625	0.615952	0.208868
2590	0.459858	0.22909	0.514179	0.634528	0.232595
2890	0.487662	0.152276	0.46324	0.583992	0.223564
3190	0.461596	0.219484	0.524703	0.657	0.251568
3490	0.411213	0.208384	0.595124	0.606512	0.243566
3790	0.633759	0.353279	0.60618	0.664073	0.243249
4090	0.707428	0.144928	0.5936	0.689033	0.237451
4390	0.751339	0.184758	0.596813	0.726831	0.259707

## Sheet: PRD2 30july F3
time	b1	b2	b3	b4	b5	background	c1	c2	c3	c4	c5	c6	c7	c8
1	479383	648744	489301	425423	474642	34747	372201	307489	491440	577481	398351	288660	366943	340249
2	477209	637811	456709	411255	513015	33747	379625	308015	520796	576111	379910	278028	337274	328459
3	447181	628634	470723	414500	453147	35475	402095	288157	527219	522256	375923	271904	337815	317011
4	464511	578752	457106	392621	464148	35602	375503	301653	533077	557835	367107	273425	340526	300190
5	490125	541504	476638	353141	477390	35510	368749	297492	535293	569016	353028	274957	347376	310551
6	66285	77615	74394	76287	59099	37624	385744	286194	512699	586078	352440	257295	329364	299108
7	89191	131162	100527	101913	87424	36304	365824	305116	502309	582563	331306	257390	347785	304937
8	102322	127767	141442	110848	91163	34025	343815	314961	495477	528612	332755	263026	335728	286986
9	113229	141518	123177	104467	99141	32948	371562	303818	522315	547928	355998	264763	345809	290371
10	117310	142145	142587	128214	105662	34251	377324	275498	514148	604740	341672	269450	328411	289065
11	130709	142658	141018	130421	106286	33806	366767	289171	510209	595447	355469	257923	331263	322607
12	124037	144237	136014	129364	94475	34178	370828	273713	476921	575669	353465	247044	310999	295001
13	119241	140990	129105	123801	96445	33984	360431	278952	473313	570807	333182	235016	300032	282815
14	159777	173081	260289	166328	154819	32985	359231	309701	461186	570513	348699	226042	360146	278622
15	196352	252997	252014	177820	134560	33250	371101	296412	477000	493153	368073	229319	338129	223411
16	198503	305705	229043	202331	146620	33914	366198	294885	443118	486842	406430	219005	334826	301726
17	235874	326470	258414	214040	237330	34409	374160	285782	472526	497295	370220	225862	335582	326392
18	251803	441203	330619	262457	237075	32078	391718	297152	458136	375215	445472	243306	310281	294904
19	271774	437726	377761	293239	172513	33723	383338	284040	447156	414335	462262	252311	314986	304071
20	274416	386888	411781	288530	229731	36872	362996	303217	446419	536208	439526	201911	460844	321081
21	322439	398878	414097	400975	185282	35194	377457	271971	457492	586995	431645	178782	341951	336766
22	319642	426857	397831	405228	117493	35109	388450	306026	459807	497653	474434	189438	332647	323117
23	362444	425268	477929	351060	200967	32984	366812	293851	415342	504451	440040	200851	352784	293703
24	405606	395898	461782	319109	191288	35756	363064	299738	440329	530734	466300	222421	312369	341557
25	403732	467456	482097	316038	249097	35831	341504	290379	413598	548721	442179	241160	345254	321455
26	416326	421591	478200	311285	277517	38087	305212	307192	416304	300993	409381	207850	320173	334610
27	426219	439391	487969	308001	294308	34745	370400	273522	374923	509735	409016	209575	304216	332205
time
0	444636	613997	454554	390676	439895	337454	272742	456693	542734	363604	253913	332196	305502
30	443462	604064	422962	377508	479268	345878	274268	487049	542364	346163	244281	303527	294712
60	411706	593159	435248	379025	417672	366620	252682	491744	486781	340448	236429	302340	281536
90	428909	543150	421504	357019	428546	339901	266051	497475	522233	331505	237823	304924	264588
120	454615	505994	441128	317631	441880	333239	261982	499783	533506	317518	239447	311866	275041
130	28661	39991	36770	38663	21475	348120	248570	475075	548454	314816	219671	291740	261484
160	52887	94858	64223	65609	51120	329520	268812	466005	546259	295002	221086	311481	268633
190	68297	93742	107417	76823	57138	309790	280936	461452	494587	298730	229001	301703	252961
220	80281	108570	90229	71519	66193	338614	270870	489367	514980	323050	231815	312861	257423
250	83059	107894	108336	93963	71411	343073	241247	479897	570489	307421	235199	294160	254814
280	96903	108852	107212	96615	72480	332961	255365	476403	561641	321663	224117	297457	288801
310	89859	110059	101836	95186	60297	336650	239535	442743	541491	319287	212866	276821	260823
320	85257	107006	95121	89817	62461	326447	244968	439329	536823	299198	201032	266048	248831
620	126792	140096	227304	133343	121834	326246	276716	428201	537528	315714	193057	327161	245637
920	163102	219747	218764	144570	101310	337851	263162	443750	459903	334823	196069	304879	190161
1220	164589	271791	195129	168417	112706	332284	260971	409204	452928	372516	185091	300912	267812
1520	201465	292061	224005	179631	202921	339751	251373	438117	462886	335811	191453	301173	291983
1820	219725	409125	298541	230379	204997	359640	265074	426058	343137	413394	211228	278203	262826
2120	238051	404003	344038	259516	138790	349615	250317	413433	380612	428539	218588	281263	270348
2420	237544	350016	374909	251658	192859	326124	266345	409547	499336	402654	165039	423972	284209
2720	287245	363684	378903	365781	150088	342263	236777	422298	551801	396451	143588	306757	301572
3020	284533	391748	362722	370119	82384	353341	270917	424698	462544	439325	154329	297538	288008
3320	329460	392284	444945	318076	167983	333828	260867	382358	471467	407056	167867	319800	260719
3620	369850	360142	426026	283353	155532	327308	263982	404573	494978	430544	186665	276613	305801
3920	367901	431625	446266	280207	213266	305673	254548	377767	512890	406348	205329	309423	285624
4220	378239	383504	440113	273198	239430	267125	269105	378217	262906	371294	169763	282086	296523
4520	391474	404646	453224	273256	259563	335655	238777	340178	474990	374271	174830	269471	297460
	AVERAGE OF PREBLEACH
	436666	572073	435079	364372	441452	344618	265545	486549	525524	339848	242379	310971	284276
NORMALIZED DATA
time	b1	b2	b3	b4	b5	c1	c2	c3	c4	c5	c6	c7	c8	Average of controls
120	1	1	1	1	1	1	1	1	1	1	1	1	1	1
130	0.065636	0.0699054	0.0845133	0.106109	0.0486463	1.01016	0.936075	0.976418	1.04363	0.926345	0.906314	0.938159	0.919825	0.957116
160	0.121116	0.165815	0.147612	0.180061	0.1158	0.956188	1.0123	0.957776	1.03946	0.868042	0.912151	1.00164	0.944973	0.961567
190	0.156406	0.163864	0.246891	0.210837	0.129432	0.898936	1.05796	0.948419	0.941132	0.879012	0.944807	0.970198	0.889844	0.941288
220	0.18385	0.189784	0.207385	0.19628	0.149944	0.982577	1.02005	1.00579	0.979937	0.950573	0.956417	1.00608	0.90554	0.975871
250	0.190212	0.188602	0.249003	0.257877	0.161764	0.995516	0.908498	0.986329	1.08556	0.904585	0.970379	0.945942	0.896362	0.961646
280	0.221916	0.190276	0.24642	0.265155	0.164185	0.966173	0.961664	0.979147	1.06873	0.946492	0.924657	0.956544	1.01592	0.977415
310	0.205784	0.192386	0.234063	0.261233	0.136588	0.976878	0.90205	0.909966	1.03038	0.939501	0.878238	0.890184	0.9175	0.930587
320	0.195246	0.18705	0.218629	0.246498	0.14149	0.947271	0.92251	0.90295	1.0215	0.880389	0.829413	0.855541	0.875315	0.904361
620	0.290364	0.244892	0.522443	0.365953	0.275985	0.946688	1.04207	0.880078	1.02284	0.928987	0.79651	1.05206	0.86408	0.941665
920	0.373517	0.384124	0.502814	0.396765	0.229493	0.980363	0.991026	0.912036	0.875133	0.985215	0.808937	0.980411	0.668931	0.900256
1220	0.376922	0.475099	0.448491	0.462212	0.255307	0.964209	0.982775	0.841034	0.86186	1.09613	0.763644	0.967654	0.942085	0.927423
1520	0.461371	0.510531	0.51486	0.492988	0.459667	0.985876	0.946631	0.900458	0.880809	0.988122	0.789892	0.968493	1.02711	0.935924
1820	0.503188	0.715162	0.686176	0.632264	0.46437	1.04359	0.998226	0.875674	0.652943	1.21641	0.87148	0.894628	0.924546	0.934687
2120	0.545156	0.706209	0.790748	0.712229	0.314394	1.0145	0.942654	0.849726	0.724253	1.26097	0.901845	0.904468	0.951006	0.943678
2420	0.543995	0.611838	0.861703	0.690663	0.436874	0.946334	1.00301	0.841739	0.950169	1.18481	0.680914	1.36338	0.999765	0.996265
2720	0.657815	0.63573	0.870883	1.00387	0.339987	0.993165	0.891664	0.867946	1.05	1.16656	0.592412	0.98645	1.06084	0.95113
3020	0.651604	0.684787	0.833692	1.01577	0.18662	1.02531	1.02023	0.872879	0.880158	1.29271	0.636727	0.956804	1.01313	0.962244
3320	0.75449	0.685724	1.02268	0.872944	0.380524	0.968689	0.982383	0.785857	0.897138	1.19776	0.692582	1.02839	0.917134	0.933742
3620	0.846987	0.629539	0.979192	0.777648	0.352319	0.949769	0.994114	0.831516	0.941876	1.26687	0.770138	0.889515	1.07572	0.96494
3920	0.842523	0.754493	1.02571	0.769014	0.483101	0.88699	0.958587	0.776422	0.97596	1.19568	0.847142	0.995023	1.00474	0.955068
4220	0.866198	0.670376	1.01157	0.749778	0.542369	0.775133	1.01341	0.777346	0.500274	1.09253	0.700404	0.907115	1.04308	0.851161
4520	0.896508	0.707333	1.0417	0.749937	0.587975	0.97399	0.899196	0.699165	0.903841	1.10129	0.72131	0.866548	1.04638	0.901465
CORRECTED DATA
Time	b1	b2	b3	b4	b5			Filter out due to large abrupt change or wrong targeting.
120	1	1	1	1	1
130	0.0685769	0.0730376	0.0883	0.110863	0.0508259
160	0.125957	0.172442	0.153512	0.187258	0.120428
190	0.166161	0.174085	0.26229	0.223988	0.137505
220	0.188396	0.194476	0.212513	0.201133	0.153651
250	0.197798	0.196124	0.258934	0.268162	0.168215
280	0.227044	0.194673	0.252113	0.271282	0.167979
310	0.221134	0.206736	0.251522	0.280719	0.146776
320	0.215893	0.206831	0.24175	0.272566	0.156453
620	0.308352	0.260063	0.554808	0.388624	0.293082
920	0.414901	0.426683	0.558523	0.440724	0.254919
1220	0.406419	0.512278	0.483588	0.498383	0.275287
1520	0.492958	0.545483	0.550109	0.526739	0.491137
1820	0.53835	0.765136	0.734124	0.676444	0.496818
2120	0.577693	0.748358	0.837942	0.754737	0.333158
2420	0.546034	0.614132	0.864933	0.693252	0.438512
2720	0.691614	0.668395	0.91563	1.05545	0.357456
3020	0.677171	0.711656	0.866404	1.05563	0.193943
3320	0.808029	0.734383	1.09524	0.934887	0.407525
3620	0.877761	0.652412	1.01477	0.805903	0.36512
3920	0.882161	0.789989	1.07397	0.805193	0.505829
4220	1.01767	0.787602	1.18846	0.880888	0.63721
4520	0.994501	0.784648	1.15557	0.83191	0.652244
	Normalize the bouton fluorescent right after bleaching to 0
Recovery Time_(sec)	b1	b2	b3	b4	b5
0	0	0	0	0	0
30	0.0616043	0.107237	0.0715281	0.08592	0.0733293
60	0.104769	0.109009	0.190841	0.12723	0.0913206
90	0.128641	0.131007	0.136243	0.101526	0.108331
120	0.138735	0.132785	0.18716	0.176912	0.123676
150	0.170134	0.131219	0.179679	0.180421	0.123427
180	0.163789	0.144233	0.17903	0.191034	0.101088
190	0.158163	0.144335	0.168312	0.181865	0.111283
490	0.257429	0.201761	0.51169	0.312394	0.255228
790	0.371822	0.38151	0.515765	0.370991	0.215022
1090	0.362716	0.473849	0.433572	0.435838	0.23648
1390	0.455627	0.509671	0.506536	0.467731	0.463889
1690	0.50436	0.74663	0.708373	0.636101	0.469874
1990	0.5466	0.72853	0.822247	0.724156	0.297451
2290	0.512611	0.583728	0.851852	0.655004	0.408445
2590	0.668909	0.642267	0.907458	1.06236	0.323049
2890	0.653403	0.688937	0.853465	1.06257	0.150781
3190	0.793895	0.713454	1.10447	0.926769	0.3758
3490	0.868761	0.625025	1.0162	0.781702	0.331124
3790	0.873485	0.773442	1.08113	0.780903	0.479367
4090	1.01897	0.770866	1.20671	0.866037	0.617784
4390	0.994096	0.76768	1.17064	0.810951	0.633623

## Sheet: PRD2 31july F4
time	b1	b2	b3	b4	b5	background	c1	c2	c3	c4	c5	c6	c7	c8
1	495422	662903	444313	380256	317304	13889	268229	415168	470521	582290	267810	297968	264544	493667
2	455371	695062	436989	394965	315229	12547	263845	405791	477827	567774	272623	287273	264109	457717
3	463593	668429	444281	397592	318259	11944	260148	395253	443533	618107	281177	300817	270846	445140
4	473343	688370	428928	366853	325268	13306	244943	419723	466473	566373	262855	320456	268157	439592
5	489639	588478	429241	383753	342674	12715	273048	404934	459129	557038	249827	311757	251002	417219
6	28760	49712	24922	19280	37016	11588	263618	386099	427147	584787	253888	317049	239813	378308
7	47692	133565	44624	29293	50243	12947	254812	397258	446463	552583	254856	307430	245622	399686
8	56006	279326	47436	30754	61710	11805	261964	386913	455473	540785	234125	300512	240059	391607
9	88990	231487	56933	36570	59299	12349	245871	385343	428052	546851	236678	314616	253174	386544
10	101878	255779	74465	46880	69068	11940	246243	379565	434206	540497	241123	313834	227027	380464
11	116355	308931	91633	50268	71237	12809	239276	373025	420842	509476	238569	302255	237066	366458
12	125607	375218	94615	52241	80085	14795	241868	430703	413177	495800	244575	272392	232077	351751
13	124406	350751	91514	50352	82939	15339	250163	357799	425401	507933	222756	278945	227124	353858
14	220566	294074	116662	106702	96747	11903	294491	405067	428689	560066	247280	291604	233421	388918
15	258808	455079	150962	120344	113776	13159	261981	427455	438186	572714	271036	271359	277919	334257
16	273655	264279	175032	179735	148521	15189	303083	401658	399405	561721	265096	316404	257911	357373
17	292390	410591	201910	186028	175199	12939	296055	418366	400005	576102	271677	320577	197774	252940
18	349638	237737	227433	193238	175630	11338	287087	427833	390752	574252	275780	335178	222294	328938
19	368401	181304	266882	193155	185546	12453	299942	453425	361109	619166	267698	336007	227894	310732
20	425252	267758	242378	178995	246283	11358	294583	461537	353158	598328	270706	350378	193991	363322
21	446827	188147	246943	188897	183205	12711	324895	477557	386379	590397	261752	343400	225265	380298
22	507569	146462	257889	215712	229107	14869	328104	486839	340784	568189	264973	330368	188333	371957
23	500287	120381	264003	195653	252262	17952	290477	458160	381830	619400	313384	309329	186794	382692
24	595712	236114	264638	222238	264930	14819	333809	474503	352627	561541	283058	347380	205896	375291
25	555316	106358	295031	201630	246993	13709	302261	435387	432688	605483	257761	338957	249182	338709
26	526903	98294	317097	190988	284468	16090	276880	448110	439494	534692	267875	358512	278044	368142
27	502449	77361	309628	219677	311037	14336	285550	453888	416330	532213	284137	357218	247565	328869
time
0	481533	649014	430424	366367	303415	254340	401279	456632	568401	253921	284079	250655	479778
30	442824	682515	424442	382418	302682	251298	393244	465280	555227	260076	274726	251562	445170
60	451649	656485	432337	385648	306315	248204	383309	431589	606163	269233	288873	258902	433196
90	460037	675064	415622	353547	311962	231637	406417	453167	553067	249549	307150	254851	426286
120	476924	575763	416526	371038	329959	260333	392219	446414	544323	237112	299042	238287	404504
130	17172	38124	13334	7692	25428	252030	374511	415559	573199	242300	305461	228225	366720
160	34745	120618	31677	16346	37296	241865	384311	433516	539636	241909	294483	232675	386739
190	44201	267521	35631	18949	49905	250159	375108	443668	528980	222320	288707	228254	379802
220	76641	219138	44584	24221	46950	233522	372994	415703	534502	224329	302267	240825	374195
250	89938	243839	62525	34940	57128	234303	367625	422266	528557	229183	301894	215087	368524
280	103546	296122	78824	37459	58428	226467	360216	408033	496667	225760	289446	224257	353649
310	110812	360423	79820	37446	65290	227073	415908	398382	481005	229780	257597	217282	336956
320	109067	335412	76175	35013	67600	234824	342460	410062	492594	207417	263606	211785	338519
620	208663	282171	104759	94799	84844	282588	393164	416786	548163	235377	279701	221518	377015
920	245649	441920	137803	107185	100617	248822	414296	425027	559555	257877	258200	264760	321098
1220	258466	249090	159843	164546	133332	287894	386469	384216	546532	249907	301215	242722	342184
1520	279451	397652	188971	173089	162260	283116	405427	387066	563163	258738	307638	184835	240001
1820	338300	226399	216095	181900	164292	275749	416495	379414	562914	264442	323840	210956	317600
2120	355948	168851	254429	180702	173093	287489	440972	348656	606713	255245	323554	215441	298279
2420	413894	256400	231020	167637	234925	283225	450179	341800	586970	259348	339020	182633	351964
2720	434116	175436	234232	176186	170494	312184	464846	373668	577686	249041	330689	212554	367587
3020	492700	131593	243020	200843	214238	313235	471970	325915	553320	250104	315499	173464	357088
3320	482335	102429	246051	177701	234310	272525	440208	363878	601448	295432	291377	168842	364740
3620	580893	221295	249819	207419	250111	318990	459684	337808	546722	268239	332561	191077	360472
3920	541607	92649	281322	187921	233284	288552	421678	418979	591774	244052	325248	235473	325000
4220	510813	82204	301007	174898	268378	260790	432020	423404	518602	251785	342422	261954	352052
4520	488113	63025	295292	205341	296701	271214	439552	401994	517877	269801	342882	233229	314533
	AVERAGE OF PREBLEACH
	462593	647768	423870	371804	310867	249162	395294	450616	565436	253978	290774	250851	437787
NORMALIZED DATA
time	b1	b2	b3	b4	b5	c1	c2	c3	c4	c5	c6	c7	c8	Average of controls
120	1	1	1	1	1	1	1	1	1	1	1	1	1	1
130	0.0371212	0.0588544	0.0314577	0.0206883	0.0817971	1.01151	0.947425	0.922201	1.01373	0.954019	1.05051	0.909802	0.837668	0.955858
160	0.0751092	0.186205	0.0747328	0.0439641	0.119974	0.970712	0.972217	0.962051	0.954371	0.952479	1.01276	0.927541	0.883396	0.95444
190	0.0955504	0.412989	0.0840611	0.0509651	0.160535	1.004	0.948935	0.98458	0.935526	0.875351	0.992891	0.909917	0.86755	0.939844
220	0.165677	0.338297	0.105183	0.0651446	0.151029	0.937228	0.943587	0.922521	0.945291	0.883261	1.03953	0.960031	0.854743	0.935773
250	0.194421	0.376429	0.14751	0.0939743	0.18377	0.940363	0.930005	0.937085	0.934777	0.902373	1.03824	0.857428	0.841789	0.922758
280	0.223838	0.457142	0.185963	0.100749	0.187952	0.908913	0.911262	0.9055	0.878378	0.888895	0.995433	0.893983	0.807811	0.898772
310	0.239545	0.556407	0.188312	0.100714	0.210026	0.911345	1.05215	0.884082	0.85068	0.904723	0.885901	0.866178	0.769681	0.890592
320	0.235773	0.517796	0.179713	0.0941707	0.217457	0.942454	0.866343	0.910002	0.871175	0.816672	0.906567	0.844265	0.773251	0.866341
620	0.451072	0.435605	0.247149	0.254971	0.272927	1.13415	0.994613	0.924924	0.969452	0.926761	0.961919	0.883065	0.861184	0.957009
920	0.531026	0.682219	0.325107	0.288284	0.323666	0.998634	1.04807	0.943212	0.989599	1.01535	0.887975	1.05545	0.733457	0.958968
1220	0.558733	0.384536	0.377104	0.442562	0.428904	1.15545	0.977676	0.852645	0.966567	0.98397	1.03591	0.967593	0.781622	0.965179
1520	0.604096	0.61388	0.445823	0.465539	0.52196	1.13627	1.02564	0.85897	0.99598	1.01874	1.058	0.736831	0.548214	0.92233
1820	0.731312	0.349506	0.509814	0.489237	0.528497	1.1067	1.05363	0.841989	0.995539	1.0412	1.11372	0.84096	0.725467	0.964901
2120	0.769462	0.260666	0.600252	0.486015	0.556808	1.15382	1.11556	0.773731	1.073	1.00499	1.11273	0.858839	0.681334	0.97175
2420	0.894725	0.395821	0.545025	0.450875	0.75571	1.13671	1.13885	0.758517	1.03808	1.02114	1.16592	0.728053	0.803962	0.973904
2720	0.93844	0.270831	0.552603	0.473868	0.548447	1.25293	1.17595	0.829237	1.02166	0.980561	1.13727	0.84733	0.839648	1.01057
3020	1.06508	0.203148	0.573336	0.540186	0.689164	1.25715	1.19397	0.723265	0.978572	0.984746	1.08503	0.691501	0.815666	0.966238
3320	1.04268	0.158126	0.580487	0.477943	0.753732	1.09376	1.11362	0.807512	1.06369	1.16322	1.00207	0.673076	0.833145	0.968763
3620	1.25573	0.341627	0.589376	0.557872	0.804561	1.28025	1.16289	0.749658	0.966903	1.05615	1.14371	0.761714	0.823396	0.993084
3920	1.17081	0.143028	0.663698	0.505431	0.750431	1.15809	1.06675	0.929791	1.04658	0.960917	1.11856	0.938695	0.74237	0.995218
4220	1.10424	0.126903	0.71014	0.470404	0.863322	1.04667	1.09291	0.939611	0.917172	0.991365	1.17762	1.04426	0.804163	1.00172
4520	1.05517	0.0972956	0.696657	0.552284	0.954432	1.0885	1.11196	0.892098	0.915889	1.0623	1.1792	0.92975	0.718462	0.987271
CORRECTED DATA
Time	b1	b2	b3	b4	b5			Filter out due to large abrupt change or wrong targeting.
120	1	1	1	1	1
130	0.0388354	0.0615723	0.0329105	0.0216437	0.0855746
160	0.0786944	0.195094	0.0783001	0.0460627	0.125701
190	0.101666	0.439423	0.0894416	0.0542272	0.17081
220	0.177048	0.361516	0.112402	0.0696158	0.161395
250	0.210696	0.40794	0.159858	0.101841	0.199153
280	0.249049	0.508629	0.206907	0.112097	0.209121
310	0.268973	0.624761	0.211446	0.113087	0.235827
320	0.272148	0.597682	0.207439	0.108699	0.251006
620	0.471336	0.455173	0.258251	0.266425	0.285188
920	0.553747	0.71141	0.339017	0.300619	0.337515
1220	0.57889	0.398409	0.390709	0.458528	0.444378
1520	0.654968	0.665575	0.483366	0.504742	0.565915
1820	0.757914	0.36222	0.528359	0.507033	0.547721
2120	0.791831	0.268244	0.617702	0.500144	0.572995
2420	0.918699	0.406427	0.559629	0.462956	0.775959
2720	0.92862	0.267997	0.546821	0.46891	0.542708
3020	1.1023	0.210247	0.593369	0.559061	0.713244
3320	1.0763	0.163225	0.599204	0.493354	0.778036
3620	1.26448	0.344006	0.593481	0.561758	0.810164
3920	1.17643	0.143715	0.666887	0.507859	0.754037
4220	1.10234	0.126685	0.70892	0.469596	0.861839
4520	1.06877	0.09855	0.705639	0.559404	0.966737
	Normalize the bouton fluorescent right after bleaching to 0
Recovery Time_(sec)	b1	b2	b3	b4	b5
0	0	0	0	0	0
30	0.0414695	0.142282	0.0469342	0.0249591	0.0438818
60	0.0653695	0.402642	0.0584549	0.0333043	0.0932124
90	0.143797	0.319624	0.0821971	0.0490333	0.0829162
120	0.178804	0.369093	0.131267	0.0819711	0.124208
150	0.218707	0.47639	0.179918	0.0924541	0.135108
180	0.239436	0.600141	0.184611	0.0934662	0.164314
190	0.242739	0.571285	0.180468	0.0889815	0.180913
490	0.449975	0.419426	0.233009	0.250196	0.218294
790	0.535716	0.692475	0.316524	0.285147	0.275518
1090	0.561876	0.358937	0.369974	0.446549	0.392381
1390	0.641027	0.643633	0.465785	0.493786	0.525292
1690	0.748132	0.320373	0.512309	0.496127	0.505395
1990	0.78342	0.220231	0.604692	0.489085	0.533034
2290	0.915414	0.367481	0.544643	0.451075	0.754993
2590	0.925736	0.219969	0.531399	0.457161	0.499914
2890	1.10643	0.158429	0.579531	0.549306	0.686408
3190	1.07938	0.108322	0.585565	0.482146	0.757263
3490	1.27516	0.300965	0.579647	0.552063	0.792398
3790	1.18356	0.0875325	0.655551	0.496972	0.731019
4090	1.10648	0.0693853	0.699014	0.457862	0.848909
4390	1.07155	0.0394039	0.695621	0.549657	0.963624

## Sheet: PRD2 16sept F1
time	b1	b2	b3	b4	b5	background	c1	c2	c3	c4	c5	c6	c7	c8
0	374388	693123	478232	303599	399723	22040	436184	335321	340949	209762	411493	265248	319585	513066
30	348379	765230	499926	358248	393673	21293	444439	291243	324500	200281	386616	269384	313358	479723
60	361436	588744	491512	325722	380670	21968	412907	317486	341205	232751	392687	267894	290963	465638
90	363194	757949	511533	341902	381448	22211	423261	326443	318876	198702	409039	262265	276467	451475
120	368198	723351	462841	332487	381470	21658	446886	312343	331735	199560	382175	258461	293428	460966
130	30716	65616	51855	34123	30291	21412	411399	276155	311045	193928	375353	201725	283976	431619
160	39997	90560	102062	45265	45466	21838	420441	323363	321097	189838	376947	214780	308334	439273
190	44380	117109	117739	65493	55115	21478	422897	298835	314973	198310	384927	200316	289337	478100
220	46235	134237	127704	78425	58833	21579	408282	310404	317641	205998	380065	205838	277195	493309
250	46797	137861	150625	78945	60162	21905	404729	351413	301363	188249	389286	197025	306064	510642
280	49014	145080	151024	87665	53690	22728	397911	322921	307209	186073	382861	193137	293433	446632
310	50638	176831	186425	87394	59454	21284	393818	323215	275704	183506	391693	192809	272685	466985
320	49891	170376	174611	84824	57700	21139	382545	308713	260805	184599	356913	189121	301256	459787
620	65419	448827	242477	141172	80812	22231	424114	390610	305190	179671	416033	225812	354883	453375
920	80330	406885	333489	168343	106260	23053	456831	387158	324918	179503	405434	224335	378992	497141
1220	70548	421767	413048	202541	112709	22847	485693	295268	366286	281223	430307	250999	325709	625549
1520	78810	403190	378618	234509	137049	23961	491953	290867	332517	214488	439875	256014	216071	608022
1820	84582	299558	316027	284314	150243	22021	476711	275795	294977	273099	425085	222839	329236	545458
2120	93626	479783	435680	299707	160574	22488	500155	368890	281434	242587	386807	249814	392432	532516
2420	88298	598285	428847	342385	139774	24286	481807	368810	357619	224739	416170	245956	331969	513781
2720	94914	556426	445216	361410	153691	22153	476321	371719	337029	266721	381522	239092	403677	599840
3020	99814	613885	457860	393784	155653	21903	450569	371574	309241	195744	380031	200422	347126	480905
3320	106225	571822	419101	364962	157796	22980	506332	433450	369258	175273	397254	157022	425407	503029
3620	124969	559181	393692	464109	148305	22804	423406	446274	291781	251401	404820	228571	447973	519902
3920	123972	574287	433695	431074	150662	22556	506414	399824	287017	301986	413704	187799	461754	408526
4220	127840	528445	408716	406964	140674	20769	421033	461208	254986	292582	378267	194965	423854	262655
4520	140900	505040	411632	425976	156704	21137	432898	339871	279091	291163	372290	229841	436055	459416
time
0	352348	671083	456192	281559	377683	414144	313281	318909	187722	389453	243208	297545	491026
30	327086	743937	478633	336955	372380	423146	269950	303207	178988	365323	248091	292065	458430
60	339468	566776	469544	303754	358702	390939	295518	319237	210783	370719	245926	268995	443670
90	340983	735738	489322	319691	359237	401050	304232	296665	176491	386828	240054	254256	429264
120	346540	701693	441183	310829	359812	425228	290685	310077	177902	360517	236803	271770	439308
130	9304	44204	30443	12711	8879	389987	254743	289633	172516	353941	180313	262564	410207
160	18159	68722	80224	23427	23628	398603	301525	299259	168000	355109	192942	286496	417435
190	22902	95631	96261	44015	33637	401419	277357	293495	176832	363449	178838	267859	456622
220	24656	112658	106125	56846	37254	386703	288825	296062	184419	358486	184259	255616	471730
250	24892	115956	128720	57040	38257	382824	329508	279458	166344	367381	175120	284159	488737
280	26286	122352	128296	64937	30962	375183	300193	284481	163345	360133	170409	270705	423904
310	29354	155547	165141	66110	38170	372534	301931	254420	162222	370409	171525	251401	445701
320	28752	149237	153472	63685	36561	361406	287574	239666	163460	335774	167982	280117	438648
620	43188	426596	220246	118941	58581	401883	368379	282959	157440	393802	203581	332652	431144
920	57277	383832	310436	145290	83207	433778	364105	301865	156450	382381	201282	355939	474088
1220	47701	398920	390201	179694	89862	462846	272421	343439	258376	407460	228152	302862	602702
1520	54849	379229	354657	210548	113088	467992	266906	308556	190527	415914	232053	192110	584061
1820	62561	277537	294006	262293	128222	454690	253774	272956	251078	403064	200818	307215	523437
2120	71138	457295	413192	277219	138086	477667	346402	258946	220099	364319	227326	369944	510028
2420	64012	573999	404561	318099	115488	457521	344524	333333	200453	391884	221670	307683	489495
2720	72761	534273	423063	339257	131538	454168	349566	314876	244568	359369	216939	381524	577687
3020	77911	591982	435957	371881	133750	428666	349671	287338	173841	358128	178519	325223	459002
3320	83245	548842	396121	341982	134816	483352	410470	346278	152293	374274	134042	402427	480049
3620	102165	536377	370888	441305	125501	400602	423470	268977	228597	382016	205767	425169	497098
3920	101416	551731	411139	408518	128106	483858	377268	264461	279430	391148	165243	439198	385970
4220	107071	507676	387947	386195	119905	400264	440439	234217	271813	357498	174196	403085	241886
4520	119763	483903	390495	404839	135567	411761	318734	257954	270026	351153	208704	414918	438279
	AVERAGE OF PREBLEACH
	341285	683845	466975	310558	365563	410901	294733	309619	186377	374568	242816	276926	452340
NORMALIZED DATA
time	b1	b2	b3	b4	b5	c1	c2	c3	c4	c5	c6	c7	c8	Average of controls
120	1	1	1	1	1	1	1	1	1	1	1	1	1	1
130	0.0272617	0.0646403	0.065192	0.0409296	0.0242886	0.949101	0.864317	0.93545	0.925628	0.944931	0.74259	0.948137	0.906856	0.902126
160	0.0532077	0.100493	0.171795	0.0754353	0.0646346	0.97007	1.02304	0.96654	0.901398	0.948049	0.7946	1.03456	0.922835	0.945137
190	0.0671052	0.139843	0.206137	0.141729	0.0920143	0.976923	0.941044	0.947923	0.948786	0.970315	0.736515	0.967258	1.00947	0.937279
220	0.0722446	0.164742	0.227261	0.183045	0.101909	0.941109	0.979954	0.956214	0.989493	0.957065	0.758841	0.923047	1.04287	0.943574
250	0.0729361	0.169565	0.275647	0.18367	0.104652	0.931669	1.11799	0.902587	0.892513	0.980813	0.721203	1.02612	1.08046	0.956669
280	0.0770207	0.178918	0.274739	0.209098	0.0846968	0.913073	1.01852	0.91881	0.876422	0.961462	0.701802	0.977535	0.937137	0.913096
310	0.0860102	0.227459	0.35364	0.212875	0.104414	0.906626	1.02442	0.82172	0.870396	0.988897	0.706398	0.907827	0.985324	0.901451
320	0.0842463	0.218232	0.328652	0.205067	0.100013	0.879544	0.97571	0.774067	0.877039	0.89643	0.691807	1.01152	0.969732	0.884481
620	0.126545	0.623819	0.471644	0.382992	0.160249	0.978052	1.24987	0.913894	0.844739	1.05135	0.838415	1.20123	0.953142	1.00384
920	0.167827	0.561285	0.664781	0.467836	0.227613	1.05567	1.23537	0.974956	0.839427	1.02086	0.828947	1.28532	1.04808	1.03608
1220	0.139769	0.583348	0.835593	0.578617	0.245818	1.12642	0.924297	1.10923	1.38631	1.08781	0.939607	1.09366	1.33241	1.12497
1520	0.160713	0.554554	0.759478	0.677968	0.309353	1.13894	0.905585	0.996567	1.02227	1.11038	0.955673	0.693723	1.2912	1.01429
1820	0.18331	0.405848	0.629597	0.844587	0.350752	1.10657	0.86103	0.881587	1.34715	1.07608	0.827036	1.10937	1.15718	1.04575
2120	0.208442	0.668711	0.884827	0.892649	0.377735	1.16249	1.17531	0.836338	1.18093	0.972638	0.936205	1.33589	1.12753	1.09092
2420	0.187562	0.83937	0.866344	1.02428	0.315918	1.11346	1.16894	1.07659	1.07552	1.04623	0.912912	1.11106	1.08214	1.07336
2720	0.213197	0.781277	0.905965	1.09241	0.359823	1.1053	1.18604	1.01698	1.31222	0.959423	0.893428	1.37771	1.27711	1.14103
3020	0.228287	0.865666	0.933577	1.19746	0.365874	1.04323	1.1864	0.928037	0.932737	0.956109	0.735202	1.1744	1.01473	0.996356
3320	0.243916	0.802582	0.848271	1.10119	0.36879	1.17632	1.39268	1.1184	0.817122	0.999215	0.55203	1.45319	1.06126	1.07128
3620	0.299354	0.784354	0.794236	1.42101	0.343309	0.974935	1.43679	0.868735	1.22653	1.01988	0.847418	1.53532	1.09895	1.12607
3920	0.297159	0.806807	0.880431	1.31543	0.350435	1.17755	1.28003	0.85415	1.49927	1.04426	0.680527	1.58597	0.853275	1.12188
4220	0.313729	0.742384	0.830766	1.24355	0.328001	0.974112	1.49437	0.756468	1.4584	0.954428	0.717398	1.45557	0.534744	1.04319
4520	0.350918	0.70762	0.836223	1.30359	0.370845	1.00209	1.08143	0.833134	1.44881	0.937488	0.859514	1.4983	0.968916	1.07871
CORRECTED DATA
Time	b1	b2	b3	b4	b5			Filter out due to large abrupt change or wrong targeting.
120	1	1	1	1	1
130	0.0302194	0.0716533	0.0722648	0.0453701	0.0269237
160	0.0562963	0.106327	0.181768	0.0798142	0.0683865
190	0.0715958	0.149201	0.219932	0.151213	0.0981717
220	0.0765649	0.174594	0.240851	0.193991	0.108003
250	0.0762396	0.177245	0.288132	0.191989	0.109392
280	0.0843512	0.195946	0.300887	0.228999	0.0927579
310	0.0954131	0.252326	0.392301	0.236147	0.115829
320	0.0952494	0.246735	0.371575	0.23185	0.113075
620	0.126062	0.621435	0.469842	0.381528	0.159636
920	0.161983	0.541739	0.641631	0.451544	0.219687
1220	0.124243	0.518547	0.742771	0.514341	0.218511
1520	0.158449	0.54674	0.748776	0.668415	0.304994
1820	0.175291	0.388092	0.602053	0.807638	0.335407
2120	0.19107	0.612981	0.811086	0.818256	0.346255
2420	0.174743	0.782004	0.807136	0.954281	0.294327
2720	0.186847	0.684715	0.793992	0.957395	0.315351
3020	0.229122	0.868832	0.936991	1.20184	0.367212
3320	0.227687	0.749182	0.791831	1.02792	0.344253
3620	0.26584	0.696542	0.705317	1.26192	0.304874
3920	0.264876	0.719155	0.784781	1.17253	0.312364
4220	0.300741	0.711651	0.796374	1.19207	0.314423
4520	0.325312	0.655987	0.775206	1.20847	0.343785
	Normalize the bouton fluorescent right after bleaching to 0
Recovery Time_(sec)	b1	b2	b3	b4	b5
0	0	0	0	0	0
30	0.0268896	0.0373498	0.118032	0.036081	0.04261
60	0.0426658	0.0835332	0.159169	0.110873	0.0732194
90	0.0477897	0.110886	0.181718	0.155684	0.0833225
120	0.0474543	0.113741	0.232681	0.153587	0.0847505
150	0.0558186	0.133886	0.24643	0.192356	0.0676557
180	0.0672252	0.194617	0.344965	0.199844	0.0913654
190	0.0670564	0.188595	0.322625	0.195342	0.0885352
490	0.0988288	0.592216	0.428546	0.352134	0.136385
790	0.13587	0.506369	0.613717	0.425478	0.198097
1090	0.0969531	0.481386	0.722735	0.49126	0.196889
1390	0.132225	0.511755	0.729208	0.652656	0.285764
1690	0.149592	0.340863	0.571056	0.798496	0.317019
1990	0.165863	0.583109	0.796371	0.809619	0.328167
2290	0.149027	0.765179	0.792113	0.952108	0.274803
2590	0.161508	0.66038	0.777945	0.95537	0.296407
2890	0.205101	0.858708	0.932083	1.21144	0.349704
3190	0.203621	0.729823	0.775616	1.02925	0.326109
3490	0.242962	0.673119	0.682363	1.27437	0.285641
3790	0.241969	0.697479	0.768017	1.18073	0.293338
4090	0.278952	0.689395	0.780513	1.2012	0.295453
4390	0.304288	0.629435	0.757696	1.21838	0.325628

## Sheet: PRD2 16sept F2
time	b1	b2	b3	b4	b5	background	c1	c2	c3	c4	c5	c6	c7	c8
0	287116	454437	332522	375803	257402	16132	319407	302885	329918	198778	291314	192323	321429	513016
30	286141	397706	307134	329366	255207	16235	313389	285723	352839	196722	287861	172001	318704	521314
60	291300	406557	301329	326647	242291	16378	268496	283019	332484	202954	281019	180746	281879	500317
90	247014	412993	319083	299304	250744	17263	293654	286213	352330	190457	278314	177902	308819	492023
120	232420	393606	296272	314699	240386	16094	298993	273586	361643	183680	247553	179281	277227	491407
130	25237	37223	39852	40177	25157	15981	292812	257041	361959	180846	245486	172551	265463	474541
160	41657	63175	60628	72835	41550	16964	282313	264515	286552	181274	258214	134809	269208	438108
190	44868	81343	63999	76838	59045	17341	268854	258528	364091	175257	253186	163093	267595	444812
220	52420	96798	70881	97405	50742	16273	277313	245938	356136	181141	236873	158160	279796	467249
250	57504	151354	81506	92152	61832	16711	286460	252189	336895	181306	247324	164015	271028	447427
280	57703	156008	84990	83218	68033	16680	297259	247473	318872	205085	250942	146426	268109	475225
310	58987	148873	97029	85848	67783	16076	268116	234770	338272	175043	251060	132468	263670	471260
320	56126	156560	91571	84613	60862	15542	247837	235530	319019	175620	235846	130614	251587	455247
620	92889	194143	125924	147720	144391	16627	273960	269101	372988	173889	266523	147031	283604	460415
920	108495	220545	165471	155319	80092	15331	283150	292001	388010	157147	232085	152569	299612	477425
1220	121454	245950	174499	165405	92947	16460	297362	313060	414360	164576	280251	110203	300490	468654
1520	129627	279576	189003	239163	192938	17179	319096	321790	353325	155878	267138	118797	276582	499223
1820	126436	277551	164739	255598	196730	17487	322876	301570	372279	197406	253412	131198	273678	505652
2120	145148	282161	186184	234664	187766	17163	329526	335664	386338	225304	284693	108244	282840	474616
2420	164933	307771	177306	224338	167890	17894	350062	312357	377415	212059	303730	142686	287193	479653
2720	193650	254821	159875	205415	179592	17699	296325	342947	393880	229173	311958	139192	301311	467769
3020	162523	343740	138802	194525	229433	17842	326331	339447	405515	234615	320887	130582	274901	460935
3320	165655	339753	147673	180232	211783	17809	319239	340693	383170	222090	325742	129901	275029	494452
3620	192462	338143	158098	220007	226873	19654	330215	345179	398065	218072	351212	145766	271524	561684
3920	186437	339202	147036	205563	154339	19060	341798	331685	446494	220834	334363	172035	281009	492620
4220	167709	352412	136799	183761	201633	18746	290230	366394	400201	246928	281258	161187	278226	516134
4520	192220	371524	164749	226411	205620	18845	346546	378885	433947	259489	299408	167750	334262	520211
time
0	270984	438305	316390	359671	241270	303275	286753	313786	182646	275182	176191	305297	496884
30	269906	381471	290899	313131	238972	297154	269488	336604	180487	271626	155766	302469	505079
60	274922	390179	284951	310269	225913	252118	266641	316106	186576	264641	164368	265501	483939
90	229751	395730	301820	282041	233481	276391	268950	335067	173194	261051	160639	291556	474760
120	216326	377512	280178	298605	224292	282899	257492	345549	167586	231459	163187	261133	475313
130	9256	21242	23871	24196	9176	276831	241060	345978	164865	229505	156570	249482	458560
160	24693	46211	43664	55871	24586	265349	247551	269588	164310	241250	117845	252244	421144
190	27527	64002	46658	59497	41704	251513	241187	346750	157916	235845	145752	250254	427471
220	36147	80525	54608	81132	34469	261040	229665	339863	164868	220600	141887	263523	450976
250	40793	134643	64795	75441	45121	269749	235478	320184	164595	230613	147304	254317	430716
280	41023	139328	68310	66538	51353	280579	230793	302192	188405	234262	129746	251429	458545
310	42911	132797	80953	69772	51707	252040	218694	322196	158967	234984	116392	247594	455184
320	40584	141018	76029	69071	45320	232295	219988	303477	160078	220304	115072	236045	439705
620	76262	177516	109297	131093	127764	257333	252474	356361	157262	249896	130404	266977	443788
920	93164	205214	150140	139988	64761	267819	276670	372679	141816	216754	137238	284281	462094
1220	104994	229490	158039	148945	76487	280902	296600	397900	148116	263791	93743	284030	452194
1520	112448	262397	171824	221984	175759	301917	304611	336146	138699	249959	101618	259403	482044
1820	108949	260064	147252	238111	179243	305389	284083	354792	179919	235925	113711	256191	488165
2120	127985	264998	169021	217501	170603	312363	318501	369175	208141	267530	91081	265677	457453
2420	147039	289877	159412	206444	149996	332168	294463	359521	194165	285836	124792	269299	461759
2720	175951	237122	142176	187716	161893	278626	325248	376181	211474	294259	121493	283612	450070
3020	144681	325898	120960	176683	211591	308489	321605	387673	216773	303045	112740	257059	443093
3320	147846	321944	129864	162423	193974	301430	322884	365361	204281	307933	112092	257220	476643
3620	172808	318489	138444	200353	207219	310561	325525	378411	198418	331558	126112	251870	542030
3920	167377	320142	127976	186503	135279	322738	312625	427434	201774	315303	152975	261949	473560
4220	148963	333666	118053	165015	182887	271484	347648	381455	228182	262512	142441	259480	497388
4520	173375	352679	145904	207566	186775	327701	360040	415102	240644	280563	148905	315417	501366
	AVERAGE OF PREBLEACH
	252378	396639	294848	312743	232786	282367	269865	329422	178098	260792	164030	285191	487195
NORMALIZED DATA
time	b1	b2	b3	b4	b5	c1	c2	c3	c4	c5	c6	c7	c8	Average of controls
120	1	1	1	1	1	1	1	1	1	1	1	1	1	1
130	0.0366752	0.0535549	0.0809605	0.0773669	0.0394182	0.980393	0.893262	1.05026	0.925699	0.880032	0.954519	0.874789	0.941225	0.937522
160	0.0978414	0.116506	0.14809	0.178648	0.105616	0.93973	0.917315	0.818366	0.922583	0.925067	0.718435	0.884473	0.864426	0.873799
190	0.109071	0.161361	0.158244	0.190242	0.179152	0.89073	0.893733	1.0526	0.886681	0.904342	0.888568	0.877496	0.877413	0.908945
220	0.143226	0.203018	0.185208	0.25942	0.148072	0.924469	0.851037	1.03169	0.925716	0.845885	0.865005	0.924022	0.925658	0.911686
250	0.161635	0.339459	0.219758	0.241223	0.193831	0.955312	0.872578	0.971956	0.924183	0.88428	0.89803	0.891742	0.884073	0.910269
280	0.162546	0.351271	0.231679	0.212756	0.220602	0.993666	0.855217	0.917339	1.05787	0.898272	0.790988	0.881616	0.941194	0.917021
310	0.170027	0.334805	0.274559	0.223097	0.222123	0.892596	0.810384	0.978063	0.892583	0.901041	0.709577	0.868168	0.934295	0.873338
320	0.160807	0.355532	0.257859	0.220855	0.194686	0.822669	0.815179	0.92124	0.898821	0.84475	0.701529	0.827673	0.902524	0.841798
620	0.302174	0.44755	0.37069	0.419171	0.548848	0.911341	0.935557	1.08178	0.883009	0.95822	0.795	0.936133	0.910904	0.926493
920	0.369145	0.517382	0.509212	0.447613	0.2782	0.948477	1.02522	1.13131	0.796282	0.831138	0.836663	0.996808	0.948479	0.939297
1220	0.416019	0.578586	0.536002	0.476253	0.328573	0.99481	1.09907	1.20787	0.831655	1.0115	0.571498	0.995928	0.928158	0.955061
1520	0.445554	0.661551	0.582755	0.709796	0.755025	1.06923	1.12875	1.02041	0.77878	0.958462	0.619508	0.909576	0.989427	0.934269
1820	0.43169	0.655669	0.499417	0.761362	0.769992	1.08153	1.05269	1.07701	1.01023	0.904649	0.693232	0.898313	1.00199	0.964955
2120	0.507117	0.668108	0.573249	0.695462	0.732876	1.10623	1.18022	1.12067	1.16869	1.02584	0.55527	0.931575	0.938953	1.00343
2420	0.582615	0.730833	0.540659	0.660107	0.644353	1.17637	1.09115	1.09137	1.09022	1.09603	0.760787	0.944275	0.947791	1.02475
2720	0.697173	0.597828	0.482202	0.600224	0.69546	0.98675	1.20523	1.14194	1.1874	1.12833	0.740675	0.994463	0.923798	1.03857
3020	0.573272	0.821648	0.410246	0.564946	0.908952	1.09251	1.19173	1.17683	1.21716	1.16202	0.687312	0.901357	0.909478	1.0423
3320	0.585812	0.811679	0.440444	0.519349	0.833273	1.06751	1.19647	1.1091	1.14702	1.18076	0.683362	0.901921	0.978341	1.03306
3620	0.684719	0.802969	0.469544	0.640631	0.890171	1.09985	1.20625	1.14871	1.1141	1.27135	0.768834	0.883162	1.11255	1.0756
3920	0.6632	0.807136	0.434041	0.596345	0.581131	1.14297	1.15845	1.29753	1.13294	1.20902	0.932603	0.918503	0.972013	1.0955
4220	0.590238	0.841233	0.400387	0.527637	0.785646	0.961457	1.28823	1.15795	1.28122	1.0066	0.868383	0.909846	1.02092	1.06183
4520	0.686966	0.889168	0.494845	0.663694	0.802348	1.16055	1.33415	1.26009	1.35119	1.07581	0.90779	1.10598	1.02909	1.15308
CORRECTED DATA
Time	b1	b2	b3	b4	b5			Filter out due to large abrupt change or wrong targeting.
120	1	1	1	1	1
130	0.0391193	0.0571239	0.0863558	0.0825228	0.0420451
160	0.111972	0.133333	0.169478	0.20445	0.12087
190	0.119997	0.177525	0.174097	0.2093	0.197099
220	0.1571	0.222684	0.203148	0.28455	0.162415
250	0.177568	0.372922	0.24142	0.265002	0.212938
280	0.177254	0.383057	0.252643	0.232008	0.240564
310	0.194686	0.383363	0.314378	0.255453	0.254338
320	0.191027	0.422348	0.306319	0.262361	0.231273
620	0.326148	0.483058	0.4001	0.452428	0.592394
920	0.393001	0.550818	0.542121	0.476541	0.296179
1220	0.435594	0.60581	0.561223	0.498662	0.344033
1520	0.476901	0.708094	0.623755	0.759734	0.808145
1820	0.447368	0.679481	0.517555	0.789013	0.797956
2120	0.505383	0.665823	0.571288	0.693083	0.73037
2420	0.568544	0.713183	0.527602	0.644165	0.628791
2720	0.67128	0.575624	0.464292	0.577931	0.66963
3020	0.550007	0.788304	0.393597	0.542019	0.872066
3320	0.567065	0.785705	0.42635	0.502729	0.806607
3620	0.636593	0.74653	0.436541	0.595603	0.827604
3920	0.605384	0.736772	0.396202	0.544357	0.53047
4220	0.555871	0.792252	0.377074	0.496915	0.739901
4520	0.595765	0.771123	0.42915	0.575583	0.695829
	Normalize the bouton fluorescent right after bleaching to 0
Recovery Time_(sec)	b1	b2	b3	b4	b5
0	0	0	0	0	0
30	0.0758191	0.0808262	0.0909791	0.132894	0.082285
60	0.0841703	0.127696	0.0960341	0.13818	0.161859
90	0.122784	0.175591	0.127832	0.220199	0.125653
120	0.144085	0.334931	0.169721	0.198893	0.178393
150	0.143759	0.34568	0.182004	0.16293	0.207232
180	0.1619	0.346004	0.249575	0.188484	0.22161
190	0.158093	0.387351	0.240754	0.196014	0.197534
490	0.298714	0.45174	0.343399	0.403176	0.574504
790	0.368289	0.523605	0.498843	0.429458	0.265288
1090	0.412616	0.581928	0.519751	0.453569	0.315242
1390	0.455605	0.690409	0.588193	0.738123	0.799725
1690	0.424869	0.660062	0.471955	0.770036	0.789088
1990	0.485246	0.645577	0.530767	0.665478	0.718536
2290	0.550979	0.695806	0.482952	0.612159	0.612499
2590	0.657897	0.549913	0.413658	0.539968	0.65513
2890	0.531687	0.775479	0.336281	0.500826	0.86645
3190	0.54944	0.772722	0.372129	0.458002	0.798119
3490	0.621798	0.731174	0.383284	0.559229	0.820037
3790	0.589318	0.720824	0.339133	0.503374	0.509862
4090	0.53779	0.779665	0.318196	0.451665	0.728485
4390	0.579308	0.757257	0.375195	0.537409	0.682479

[truncated: 5 more sheets: PRD1-2 30july F2, PRD1-2 31july F1, PRD1-2 31july F2, PRD1-2 17sept F4, PRD1-2 18sept F1]
