# Supplementary material for: A proline-rich motif on VGLUT1 reduces synaptic vesicle super-pool and spontaneous release frequency
Source: eLife journal article supplement (doi:10.7554/elife.50401), 2019-10-30
Supplement: supp [file elife-50401-supp-v1.zip › elife_poa_e50401_Figure_4_source_data_3.xlsx]

## Sheet: WT 9feb F1
time	b1	b2	b3	b4	b5	background	c1	c2	c3	c4	c5	c6	c7	c8
0	418353	379618	325479	383020	449074	2592	242938	315248	371032	379805	385402	268782	232607	212625
30	420259	372291	403067	379517	495387	3083	247370	314703	348906	374856	383513	264026	229219	204978
60	411971	360349	337764	391471	470256	3242	220589	308033	353406	376260	372904	265501	231837	201469
90	407536	346980	311924	381883	431063	2822	238677	278260	365819	369841	390901	255880	236956	208045
120	408406	347432	262231	375628	416357	2799	227734	303149	353128	367600	364391	254524	236358	195158
130	20025	19402	26609	23416	22902	2836	233040	288272	332728	351075	346768	282481	228236	183382
160	30374	32377	41592	36034	43334	2826	225486	286308	345214	346923	350342	284427	228500	192787
190	38518	38491	66406	46265	51593	2712	230402	287915	341593	331666	344761	289891	234012	190241
220	44451	40941	61140	42473	63089	3083	226472	276833	324990	342589	340663	291287	217483	179600
250	56664	46102	87232	46301	71013	2683	238915	285744	348576	321580	325894	278719	227024	178984
280	52604	51058	88543	56199	80543	3164	232518	271612	377766	329473	326739	261881	233378	178094
310	56961	54600	100015	51977	81469	3025	238732	261645	324070	314563	323785	278477	223584	182357
320	56824	59636	96002	48103	80113	3505	218057	259671	346683	311228	304558	270054	203624	171721
620	71596	76217	183699	67210	121878	3728	235729	283052	298869	349593	347272	226357	185947	202864
920	79119	88589	242793	98768	141798	3472	223367	300853	311489	337238	357650	255014	183665	198798
1220	78892	105410	240182	121873	149114	2729	248884	307620	367625	321527	351412	235763	212013	189192
1520	91131	118772	228194	136828	156025	3511	253747	284585	329584	318475	321744	213935	233657	194968
1820	92938	118928	266610	143686	141993	3586	256389	271803	323400	324198	316955	279728	220502	204373
2120	109743	146860	269493	139405	147476	3744	251858	286874	326876	313909	320395	269169	204445	203132
2420	104174	186685	287488	166505	173344	3105	234272	305298	333917	316323	355198	276166	193470	201252
2720	105245	177183	291915	168787	196962	2989	260164	273875	322032	292593	361613	274699	187211	196293
3020	93096	164324	282659	174329	178092	2785	251077	267453	329253	285059	346750	285055	168421	194342
3320	94649	160114	246350	194078	190997	3269	261394	227824	315192	276386	335207	263032	170984	191552
3620	84688	131517	249665	185074	164960	3224	251614	236794	285629	239214	308879	291480	153691	178209
3920	83416	152055	258355	193579	182501	3106	259933	254705	305119	224959	303838	254445	151290	193396
4220	81789	180514	248277	206202	160909	3175	260309	261197	309734	246991	302240	252420	137313	195193
4520	81393	188900	240129	226101	161289	3084	261709	271699	290850	289299	301576	253542	156985	199553
time
0	415761	377026	322887	380428	446482	240346	312656	368440	377213	382810	266190	230015	210033
30	417176	369208	399984	376434	492304	244287	311620	345823	371773	380430	260943	226136	201895
60	408729	357107	334522	388229	467014	217347	304791	350164	373018	369662	262259	228595	198227
90	404714	344158	309102	379061	428241	235855	275438	362997	367019	388079	253058	234134	205223
120	405607	344633	259432	372829	413558	224935	300350	350329	364801	361592	251725	233559	192359
130	17189	16566	23773	20580	20066	230204	285436	329892	348239	343932	279645	225400	180546
160	27548	29551	38766	33208	40508	222660	283482	342388	344097	347516	281601	225674	189961
190	35806	35779	63694	43553	48881	227690	285203	338881	328954	342049	287179	231300	187529
220	41368	37858	58057	39390	60006	223389	273750	321907	339506	337580	288204	214400	176517
250	53981	43419	84549	43618	68330	236232	283061	345893	318897	323211	276036	224341	176301
280	49440	47894	85379	53035	77379	229354	268448	374602	326309	323575	258717	230214	174930
310	53936	51575	96990	48952	78444	235707	258620	321045	311538	320760	275452	220559	179332
320	53319	56131	92497	44598	76608	214552	256166	343178	307723	301053	266549	200119	168216
620	67868	72489	179971	63482	118150	232001	279324	295141	345865	343544	222629	182219	199136
920	75647	85117	239321	95296	138326	219895	297381	308017	333766	354178	251542	180193	195326
1220	76163	102681	237453	119144	146385	246155	304891	364896	318798	348683	233034	209284	186463
1520	87620	115261	224683	133317	152514	250236	281074	326073	314964	318233	210424	230146	191457
1820	89352	115342	263024	140100	138407	252803	268217	319814	320612	313369	276142	216916	200787
2120	105999	143116	265749	135661	143732	248114	283130	323132	310165	316651	265425	200701	199388
2420	101069	183580	284383	163400	170239	231167	302193	330812	313218	352093	273061	190365	198147
2720	102256	174194	288926	165798	193973	257175	270886	319043	289604	358624	271710	184222	193304
3020	90311	161539	279874	171544	175307	248292	264668	326468	282274	343965	282270	165636	191557
3320	91380	156845	243081	190809	187728	258125	224555	311923	273117	331938	259763	167715	188283
3620	81464	128293	246441	181850	161736	248390	233570	282405	235990	305655	288256	150467	174985
3920	80310	148949	255249	190473	179395	256827	251599	302013	221853	300732	251339	148184	190290
4220	78614	177339	245102	203027	157734	257134	258022	306559	243816	299065	249245	134138	192018
4520	78309	185816	237045	223017	158205	258625	268615	287766	286215	298492	250458	153901	196469
	AVERAGE OF PREBLEACH
	410397	358426	325185	379396	449520	232554	300971	355551	370765	376515	258835	230488	201547
NORMALIZED DATA
time	b1	b2	b3	b4	b5	c1	c2	c3	c4	c5	c6	c7	c8	Average of controls
120	1	1	1	1	1	1	1	1	1	1	1	1	1	1
130	0.0418838	0.0462187	0.073106	0.0542441	0.0446387	0.989895	0.948384	0.927834	0.939245	0.913463	1.0804	0.977926	0.895799	0.959118
160	0.0671252	0.0824465	0.119212	0.0875286	0.0901139	0.957455	0.941891	0.96298	0.928074	0.922981	1.08796	0.979115	0.942513	0.965371
190	0.0872471	0.0998224	0.19587	0.114796	0.10874	0.979084	0.94761	0.953116	0.887231	0.908461	1.10951	1.00352	0.930446	0.964872
220	0.1008	0.105623	0.178535	0.103823	0.133489	0.96059	0.909556	0.905376	0.915691	0.896592	1.11347	0.930201	0.875809	0.93841
250	0.131533	0.121138	0.260002	0.114967	0.152007	1.01582	0.940493	0.972838	0.860106	0.858429	1.06646	0.973331	0.874737	0.945276
280	0.120469	0.133623	0.262555	0.139788	0.172137	0.98624	0.89194	1.05358	0.880097	0.859396	0.999544	0.998812	0.867935	0.942193
310	0.131424	0.143893	0.298261	0.129026	0.174506	1.01356	0.859285	0.902952	0.840258	0.851919	1.0642	0.956923	0.889776	0.922359
320	0.12992	0.156604	0.284444	0.11755	0.170422	0.92259	0.851132	0.965202	0.829968	0.799579	1.0298	0.868241	0.834623	0.887642
620	0.165371	0.202242	0.553441	0.167324	0.262836	0.997622	0.928076	0.830096	0.932842	0.912432	0.860119	0.79058	0.988036	0.904975
920	0.184326	0.237474	0.735952	0.251178	0.307719	0.945565	0.988072	0.86631	0.90021	0.940675	0.971824	0.78179	0.969132	0.920447
1220	0.185584	0.286477	0.730208	0.314036	0.325648	1.05849	1.01302	1.02628	0.859839	0.926081	0.900319	0.908005	0.925157	0.952149
1520	0.2135	0.321575	0.690938	0.351393	0.339282	1.07603	0.933891	0.917093	0.849498	0.845208	0.812966	0.998517	0.949935	0.922893
1820	0.217721	0.321801	0.808843	0.369271	0.3079	1.08707	0.891172	0.899489	0.864731	0.832289	1.06686	0.941117	0.996227	0.94737
2120	0.258284	0.39929	0.817223	0.357571	0.319746	1.06691	0.940722	0.908821	0.836555	0.841006	1.02546	0.870766	0.989286	0.934941
2420	0.246271	0.512183	0.874526	0.430684	0.378713	0.994036	1.00406	0.930422	0.844789	0.935138	1.05496	0.825922	0.983129	0.946557
2720	0.249163	0.485997	0.888496	0.437005	0.431512	1.10587	0.90004	0.897321	0.781099	0.952484	1.04974	0.79927	0.959099	0.930616
3020	0.220057	0.450689	0.86066	0.45215	0.389987	1.06767	0.87938	0.918204	0.761329	0.91355	1.09054	0.718632	0.950432	0.912468
3320	0.222662	0.437593	0.747515	0.502928	0.417619	1.10996	0.746102	0.877296	0.736631	0.881607	1.00359	0.727652	0.934187	0.877127
3620	0.1985	0.357934	0.757848	0.479314	0.359797	1.0681	0.776055	0.794275	0.636495	0.811801	1.11367	0.65282	0.868208	0.840177
3920	0.195688	0.415564	0.784934	0.502042	0.399081	1.10438	0.835958	0.849423	0.598366	0.798726	0.971039	0.642915	0.944145	0.843118
4220	0.191556	0.494771	0.75373	0.535132	0.350894	1.1057	0.857299	0.862209	0.657603	0.794299	0.962949	0.581974	0.952719	0.846843
4520	0.190813	0.518422	0.728953	0.587821	0.351942	1.11211	0.892495	0.809353	0.771958	0.792777	0.967636	0.667719	0.974803	0.873606
CORRECTED DATA
Time	b1	b2	b3	b4	b5			Filter out due to large abrupt change or wrong targeting.
120	1	1	1	1	1
130	0.0436691	0.0481887	0.0762221	0.0565562	0.0465415
160	0.0695331	0.085404	0.123488	0.0906683	0.0933465
190	0.0904235	0.103457	0.203001	0.118975	0.112699
220	0.107416	0.112555	0.190253	0.110637	0.14225
250	0.139148	0.128151	0.275055	0.121623	0.160807
280	0.12786	0.141821	0.278663	0.148364	0.182698
310	0.142487	0.156005	0.323367	0.139887	0.189196
320	0.146366	0.176427	0.320449	0.132429	0.191994
620	0.182736	0.223478	0.611554	0.184893	0.290434
920	0.200257	0.257999	0.79956	0.272887	0.334315
1220	0.19491	0.300874	0.766905	0.329818	0.342013
1520	0.231338	0.348443	0.748666	0.380751	0.367629
1820	0.229816	0.339678	0.853777	0.389785	0.325005
2120	0.276257	0.427075	0.874091	0.382453	0.341996
2420	0.260176	0.541101	0.923902	0.455001	0.400095
2720	0.26774	0.522231	0.95474	0.469587	0.463684
3020	0.241167	0.493924	0.943222	0.495524	0.427398
3320	0.253854	0.498894	0.852231	0.573381	0.476121
3620	0.23626	0.426022	0.902009	0.570492	0.42824
3920	0.232101	0.492889	0.930989	0.595459	0.47334
4220	0.2262	0.584253	0.890046	0.631914	0.414356
4520	0.21842	0.593427	0.834419	0.672867	0.402862
	Normalize the bouton fluorescent right after bleaching to 0
Recovery Time_(sec)	b1	b2	b3	b4	b5
0	0	0	0	0	0
30	0.027045	0.0390994	0.0511662	0.0361571	0.0490897
60	0.0488894	0.058066	0.137239	0.0661605	0.0693873
90	0.0666574	0.067625	0.123439	0.0573227	0.100381
120	0.0998391	0.0840104	0.215238	0.0689669	0.119843
150	0.0880351	0.0983729	0.219145	0.0973118	0.142803
180	0.10333	0.113275	0.267537	0.0883263	0.149618
190	0.107386	0.134731	0.264378	0.0804215	0.152553
490	0.145417	0.184164	0.579503	0.13603	0.255798
790	0.163738	0.220432	0.783021	0.229299	0.301821
1090	0.158147	0.265479	0.747672	0.289643	0.309895
1390	0.196239	0.315455	0.727928	0.343629	0.336761
1690	0.194647	0.306247	0.841712	0.353205	0.292056
1990	0.243208	0.398069	0.863702	0.345433	0.309876
2290	0.226393	0.517868	0.917623	0.42233	0.370812
2590	0.234303	0.498042	0.951005	0.43779	0.437504
2890	0.206517	0.468302	0.938537	0.465283	0.399448
3190	0.219782	0.473524	0.840039	0.547807	0.450549
3490	0.201385	0.396962	0.893924	0.544744	0.40033
3790	0.197036	0.467214	0.925295	0.571208	0.447632
4090	0.190866	0.563205	0.880974	0.609848	0.385769
4390	0.18273	0.572843	0.820757	0.653257	0.373713

## Sheet: WT 7jan F3
	IntDen(b1)	IntDen(b2)	IntDen(b3)	IntDen(b4)	IntDen(b5)	IntDen(background)	IntDen(c1)	IntDen(c2)	IntDen(c3)	IntDen(c4)	IntDen(c5)	IntDen(c6)	IntDen(c7)	IntDen(c8)
0	5460764	8100874	5259697	4361872	7279647	239730	4350001	7061570	6009249	5461549	4684718	5126702	4348935	6906049
30	5613752	8033414	5489879	4438616	7320835	243249	4216643	7066766	5692039	5490130	4713414	5268890	4124652	6761593
60	5665389	8368337	5352725	4138899	7355995	231307	3975660	7362204	5542243	4971532	4999082	5044684	4438960	6720876
90	5367155	7540562	5355068	4096920	7103647	251266	4172719	7154802	5681843	5302082	4780737	5111365	4321509	6563329
120	5488897	8360407	5120761	4388465	7246594	243312	3992998	7346707	5603862	4893812	5052844	5147261	4469817	6579975
130	478221	581025	468597	453495	633839	221751	3892663	6873262	5670439	4488138	4721156	5038624	4668265	6387255
160	722341	935261	707381	615599	1048485	245723	4044485	6851089	5689257	4602789	4869492	4711170	4244410	5979432
190	792491	973190	761993	659515	1099010	237387	3412179	6342135	5694621	5302556	4850631	4957501	4458801	6343676
220	799474	1037792	789561	653724	1216123	214741	3953801	6594846	5207139	5261494	4659282	5017008	4060587	6213238
250	842278	1303737	838173	747600	1160484	240201	4170291	6470736	5567089	4784671	4647281	5647188	4583008	6347911
280	810812	1196400	849762	712135	1260803	203936	4105550	6722049	5454266	5070445	4139751	5208195	4110399	6245943
310	822894	1417245	906997	759544	1297945	213866	3997494	6218170	5105036	4929128	4501453	5238008	3929225	6344317
320	816191	1430425	927133	765157	1249564	217466	3870701	6111184	5246981	4898224	4350160	5085644	3951134	6192546
620	959917	1732114	1035870	1113991	1945468	243654	4314825	6704995	5339485	5284451	4864263	5253715	4372070	6904606
920	1165653	2023734	1096300	1557606	2652744	245676	4516248	6137240	4675213	5644387	4831527	4945423	4440505	7529814
1220	1242300	2246732	1176398	1587243	3177878	259016	4983285	6754051	4490229	5282582	4931277	4695770	3885001	6979724
1520	1302862	2328739	1201013	1399989	3278864	228646	5149948	6469551	4814766	5030685	4552367	4434213	4221890	7251728
1820	1400266	2748295	1311939	1430160	4209451	245930	4820412	6666098	5041524	4882561	4864128	4890111	4002824	6408776
2120	1791705	3089621	1330194	1362920	4152037	230609	5181154	6800626	5241080	4685351	5044002	4839488	3854686	6845296
2420	1738216	2821885	1381167	1580914	4708806	219213	5423137	6959634	4750434	4819589	4266397	4890475	4126426	6635488
2720	1843654	3224318	1323017	1754885	4769224	198468	5235325	6628256	5244375	4392001	4553765	5222758	4172360	6838906
3020	1952862	3243251	1367030	1662037	4535987	218217	4899779	6448423	4842240	4372712	4317848	4888604	4003617	6197023
3320	2050805	3733107	1496350	1847856	5075865	221597	4612060	6293491	5275193	5643729	4628144	4914044	3409556	6155350
3620	2096380	3862468	1562917	2018232	4993644	206081	4579250	6396799	5216194	4640898	4076514	4816480	3548798	6169823
3920	2409999	3838596	1562240	2527351	5083250	209065	4551686	6199295	4996274	4758966	4317685	4377697	3801694	6165092
4220	2742179	3763333	1499693	2327666	5319094	195383	4608884	5875941	5327459	4225467	3947290	4585622	3287582	5523822
4520	2583394	3940905	1614771	2179733	5124559	194139	4459765	5910471	5081709	4470296	4036476	4271208	3769175	5728588
time
0	5221034	7861144	5019967	4122142	7039917	4110271	6821840	5769519	5221819	4444988	4886972	4109205	6666319
30	5370503	7790165	5246630	4195367	7077586	3973394	6823517	5448790	5246881	4470165	5025641	3881403	6518344
60	5434082	8137030	5121418	3907592	7124688	3744353	7130897	5310936	4740225	4767775	4813377	4207653	6489569
90	5115889	7289296	5103802	3845654	6852381	3921453	6903536	5430577	5050816	4529471	4860099	4070243	6312063
120	5245585	8117095	4877449	4145153	7003282	3749686	7103395	5360550	4650500	4809532	4903949	4226505	6336663
130	256470	359274	246846	231744	412088	3670912	6651511	5448688	4266387	4499405	4816873	4446514	6165504
160	476618	689538	461658	369876	802762	3798762	6605366	5443534	4357066	4623769	4465447	3998687	5733709
190	555104	735803	524606	422128	861623	3174792	6104748	5457234	5065169	4613244	4720114	4221414	6106289
220	584733	823051	574820	438983	1001382	3739060	6380105	4992398	5046753	4444541	4802267	3845846	5998497
250	602077	1063536	597972	507399	920283	3930090	6230535	5326888	4544470	4407080	5406987	4342807	6107710
280	606876	992464	645826	508199	1056867	3901614	6518113	5250330	4866509	3935815	5004259	3906463	6042007
310	609028	1203379	693131	545678	1084079	3783628	6004304	4891170	4715262	4287587	5024142	3715359	6130451
320	598725	1212959	709667	547691	1032098	3653235	5893718	5029515	4680758	4132694	4868178	3733668	5975080
620	716263	1488460	792216	870337	1701814	4071171	6461341	5095831	5040797	4620609	5010061	4128416	6660952
920	919977	1778058	850624	1311930	2407068	4270572	5891564	4429537	5398711	4585851	4699747	4194829	7284138
1220	983284	1987716	917382	1328227	2918862	4724269	6495035	4231213	5023566	4672261	4436754	3625985	6720708
1520	1074216	2100093	972367	1171343	3050218	4921302	6240905	4586120	4802039	4323721	4205567	3993244	7023082
1820	1154336	2502365	1066009	1184230	3963521	4574482	6420168	4795594	4636631	4618198	4644181	3756894	6162846
2120	1561096	2859012	1099585	1132311	3921428	4950545	6570017	5010471	4454742	4813393	4608879	3624077	6614687
2420	1519003	2602672	1161954	1361701	4489593	5203924	6740421	4531221	4600376	4047184	4671262	3907213	6416275
2720	1645186	3025850	1124549	1556417	4570756	5036857	6429788	5045907	4193533	4355297	5024290	3973892	6640438
3020	1734645	3025034	1148813	1443820	4317770	4681562	6230206	4624023	4154495	4099631	4670387	3785400	5978806
3320	1829208	3511510	1274753	1626259	4854268	4390463	6071894	5053596	5422132	4406547	4692447	3187959	5933753
3620	1890299	3656387	1356836	1812151	4787563	4373169	6190718	5010113	4434817	3870433	4610399	3342717	5963742
3920	2200934	3629531	1353175	2318286	4874185	4342621	5990230	4787209	4549901	4108620	4168632	3592629	5956027
4220	2546796	3567950	1304310	2132283	5123711	4413501	5680558	5132076	4030084	3751907	4390239	3092199	5328439
4520	2389255	3746766	1420632	1985594	4930420	4265626	5716332	4887570	4276157	3842337	4077069	3575036	5534449
	AVERAGE OF PREBLEACH
	5.27742e+06	7838946	5.07385e+06	4.04318e+06	7.01957e+06	3.89983e+06	6956637	5.46407e+06	4.98205e+06	4.60439e+06	4.89801e+06	4.099e+06	6.46459e+06
NORMALIZED DATA
time	b1	b2	b3	b4	b5	c1	c2	c3	c4	c5	c6	c7	c8	Average of controls
120	1	1	1	1	1	1	1	1	1	1	1	1	1	1
130	0.0485976	0.0458319	0.0486506	0.0573172	0.0587056	0.9413	0.956139	0.997184	0.856352	0.9772	0.983435	1.08478	0.953734	0.968766
160	0.0903127	0.0879631	0.0909877	0.0914814	0.114361	0.974084	0.949506	0.996241	0.874553	1.00421	0.911686	0.975527	0.886941	0.946593
190	0.105185	0.093865	0.103394	0.104405	0.122746	0.814084	0.877543	0.998748	1.01668	1.00192	0.96368	1.02986	0.944575	0.955888
220	0.110799	0.104995	0.113291	0.108574	0.142656	0.958775	0.917125	0.913677	1.01299	0.965284	0.980453	0.93824	0.9279	0.951805
250	0.114086	0.135673	0.117854	0.125495	0.131102	1.00776	0.895625	0.974893	0.912169	0.957148	1.10392	1.05948	0.944794	0.981973
280	0.114995	0.126607	0.127285	0.125693	0.15056	1.00046	0.936963	0.960882	0.976809	0.854797	1.02169	0.953028	0.934631	0.954907
310	0.115403	0.153513	0.136608	0.134963	0.154437	0.970203	0.863104	0.895151	0.94645	0.931196	1.02575	0.906406	0.948312	0.935822
320	0.11345	0.154735	0.139867	0.13546	0.147031	0.936767	0.847208	0.92047	0.939525	0.897556	0.99391	0.910872	0.924278	0.921323
620	0.135722	0.18988	0.156137	0.21526	0.242438	1.04394	0.928802	0.932606	1.01179	1.00352	1.02288	1.00718	1.03037	0.997636
920	0.174323	0.226824	0.167649	0.32448	0.342908	1.09507	0.846898	0.810666	1.08363	0.995974	0.959522	1.02338	1.12677	0.992739
1220	0.186319	0.253569	0.180806	0.32851	0.415818	1.2114	0.933646	0.77437	1.00833	1.01474	0.905828	0.884602	1.03962	0.971568
1520	0.20355	0.267905	0.191643	0.289708	0.434531	1.26193	0.897115	0.839322	0.963868	0.939044	0.858628	0.974199	1.08639	0.977562
1820	0.218731	0.319222	0.210099	0.292896	0.564639	1.17299	0.922884	0.877659	0.930668	1.003	0.948178	0.916539	0.953323	0.965656
2120	0.295807	0.364719	0.216716	0.280054	0.558642	1.26943	0.944424	0.916984	0.894159	1.04539	0.94097	0.884136	1.02322	0.989839
2420	0.287831	0.332018	0.229008	0.336789	0.639582	1.3344	0.968919	0.829275	0.923391	0.878984	0.953707	0.953211	0.992526	0.979301
2720	0.311741	0.386002	0.221636	0.384949	0.651145	1.29156	0.924267	0.92347	0.841729	0.945902	1.02578	0.969478	1.0272	0.993673
3020	0.328692	0.385898	0.226418	0.3571	0.615105	1.20045	0.895577	0.846259	0.833893	0.890375	0.953528	0.923493	0.924854	0.933554
3320	0.34661	0.447957	0.25124	0.402223	0.691533	1.12581	0.87282	0.924877	1.08833	0.957032	0.958032	0.77774	0.917885	0.952816
3620	0.358186	0.466439	0.267417	0.448199	0.682031	1.12137	0.889901	0.916919	0.890159	0.840597	0.94128	0.815495	0.922524	0.917281
3920	0.417047	0.463013	0.266696	0.573382	0.694371	1.11354	0.861081	0.876124	0.913259	0.892327	0.851087	0.876464	0.921331	0.913152
4220	0.482584	0.455157	0.257065	0.527377	0.729918	1.13172	0.816567	0.93924	0.808921	0.814855	0.896332	0.754379	0.82425	0.873282
4520	0.452732	0.477968	0.279991	0.491097	0.702382	1.0938	0.821709	0.894492	0.858313	0.834495	0.832393	0.872172	0.856117	0.882936
CORRECTED DATA
Time	b1	b2	b3	b4	b5			Filter out due to large abrupt change or wrong targeting.
120	1	1	1	1	1
130	0.0501645	0.0473096	0.0502192	0.0591652	0.0605983
160	0.0954081	0.092926	0.0961212	0.0966428	0.120813
190	0.110039	0.0981967	0.108165	0.109223	0.12841
220	0.116409	0.110312	0.119027	0.114071	0.149879
250	0.11618	0.138164	0.120017	0.127799	0.133509
280	0.120425	0.132585	0.133296	0.131628	0.15767
310	0.123317	0.164041	0.145977	0.144218	0.165028
320	0.123138	0.167949	0.151812	0.147028	0.159587
620	0.136044	0.19033	0.156507	0.215771	0.243013
920	0.175598	0.228483	0.168875	0.326853	0.345416
1220	0.191772	0.26099	0.186097	0.338124	0.427986
1520	0.208222	0.274054	0.196041	0.296358	0.444504
1820	0.226511	0.330576	0.217571	0.303313	0.584721
2120	0.298843	0.368463	0.218941	0.282929	0.564377
2420	0.293914	0.339036	0.233849	0.343908	0.653101
2720	0.313726	0.38846	0.223047	0.3874	0.65529
3020	0.352087	0.413364	0.242534	0.382517	0.658885
3320	0.363775	0.47014	0.263681	0.422141	0.725778
3620	0.390487	0.508501	0.291532	0.488617	0.743535
3920	0.456712	0.507049	0.292061	0.627915	0.760411
4220	0.552609	0.521202	0.294366	0.603903	0.835833
4520	0.512757	0.541339	0.317113	0.556209	0.795507
	Normalize the bouton fluorescent right after bleaching to 0
Recovery Time_(sec)	b1	b2	b3	b4	b5
0	0	0	0	0	0
30	0.0476331	0.0478816	0.048329	0.0398344	0.0640987
60	0.0630365	0.0534141	0.0610101	0.0532057	0.0721863
90	0.0697436	0.0661306	0.0724461	0.0583589	0.0950401
120	0.069502	0.0953661	0.0734886	0.0729497	0.0776142
150	0.0739714	0.0895105	0.0874693	0.07702	0.103333
180	0.0770159	0.122528	0.100821	0.0904016	0.111166
190	0.0768281	0.12663	0.106964	0.0933882	0.105374
490	0.0904149	0.150123	0.111908	0.166454	0.194182
790	0.132058	0.19017	0.124929	0.284521	0.303191
1090	0.149086	0.224291	0.143062	0.296501	0.391087
1390	0.166405	0.238005	0.153533	0.252109	0.408671
1690	0.18566	0.297333	0.1762	0.259501	0.557932
1990	0.261813	0.337101	0.177643	0.237836	0.536276
2290	0.256623	0.306213	0.193339	0.302649	0.630723
2590	0.277481	0.358091	0.181966	0.348876	0.633054
2890	0.317868	0.384233	0.202483	0.343686	0.63688
3190	0.330173	0.443828	0.224749	0.385802	0.708089
3490	0.358296	0.484094	0.254073	0.456458	0.726991
3790	0.428019	0.482569	0.254629	0.604516	0.744956
4090	0.528981	0.497426	0.257056	0.578994	0.825243
4390	0.487024	0.518563	0.281006	0.528301	0.782316

## Sheet: WT 9jan F3
	IntDen(b1)	IntDen(b2)	IntDen(b3)	IntDen(b4)	IntDen(b5)	IntDen(background)	IntDen(c1)	IntDen(c2)	IntDen(c3)	IntDen(c4)	IntDen(c5)	IntDen(c6)	IntDen(c7)	IntDen(c8)
0	247967	236852	381861	239980	244039	5859	460639	310195	206680	229136	311176	257969	291883	154268
30	263237	230351	371061	255326	239300	6257	437991	293541	211672	232613	296821	244797	309971	151795
60	250244	239393	364314	230766	243877	6283	429441	329896	207980	235420	271924	255001	292505	148330
90	255029	231262	338631	248805	240332	6143	455370	314400	197216	222862	249906	238224	276874	144576
120	235858	231696	358976	242191	232628	6146	405588	297512	199162	238232	269186	241441	299580	149500
130	19845	23438	20728	11602	16271	5495	387996	279918	193521	219871	271777	226127	281857	134490
160	29159	30589	28050	19784	28734	5547	392586	278227	195737	220294	255716	236322	291625	140248
190	32255	35691	25494	26391	39530	5865	394484	309299	203066	223494	254872	233318	257299	137793
220	34893	37208	32733	27187	34650	5153	394036	262532	187407	217813	269789	235106	265688	141365
250	34803	39762	37809	45762	39715	6049	388511	253427	185865	211000	268457	245216	252334	142243
280	40742	40219	35826	30626	40444	6191	361498	280648	194016	219809	252965	242385	256889	130676
310	38157	39579	37855	31137	41395	6344	387246	264935	174545	217257	267314	241196	255310	129891
320	38376	40840	38593	30939	38975	5655	374858	220796	170969	217351	262825	225253	241572	130696
620	46179	50810	62889	44842	46725	5705	410062	322909	194176	222725	282301	226316	254170	133000
920	57269	68695	62289	52707	52909	6631	414769	306397	214000	218738	273281	247641	274356	133665
1220	62844	71970	72470	60283	55293	6303	388954	404438	210437	225310	297111	276657	265662	133200
1520	60594	74037	68645	58702	64899	6507	394395	393239	208819	229679	289899	286178	263023	155058
1820	53386	79658	71882	76721	78600	6683	397591	407142	203516	222565	312401	282106	283565	154403
2120	59563	83140	75246	83120	79572	6441	400735	392213	203199	219014	321105	257785	263691	165407
2420	93819	92214	78869	76780	84694	6323	420570	430178	195812	207371	293649	247615	249003	170323
2720	90720	89329	77532	86639	98554	6289	365139	404433	167951	212980	272402	253256	245113	171353
3020	82909	94011	102198	81097	91078	6200	355020	450013	204158	222726	305386	244867	255700	167054
3320	80679	97915	99535	79096	93855	6428	381331	437739	190997	209358	312915	231572	239773	162018
3620	84150	108801	75452	96599	90387	5961	407108	451946	186636	198145	302976	217868	232280	159056
3920	83023	118588	80989	81767	96085	6207	375856	412724	176266	172318	287044	224813	214946	172952
4220	89752	114664	85710	76119	103813	6001	363559	410823	169904	170334	293258	199558	197766	186487
4520	88838	127781	114093	87894	97902	5730	350660	427943	184902	169264	297380	217623	224049	177644
time
0	242108	230993	376002	234121	238180	454780	304336	200821	223277	305317	252110	286024	148409
30	256980	224094	364804	249069	233043	431734	287284	205415	226356	290564	238540	303714	145538
60	243961	233110	358031	224483	237594	423158	323613	201697	229137	265641	248718	286222	142047
90	248886	225119	332488	242662	234189	449227	308257	191073	216719	243763	232081	270731	138433
120	229712	225550	352830	236045	226482	399442	291366	193016	232086	263040	235295	293434	143354
130	14350	17943	15233	6107	10776	382501	274423	188026	214376	266282	220632	276362	128995
160	23612	25042	22503	14237	23187	387039	272680	190190	214747	250169	230775	286078	134701
190	26390	29826	19629	20526	33665	388619	303434	197201	217629	249007	227453	251434	131928
220	29740	32055	27580	22034	29497	388883	257379	182254	212660	264636	229953	260535	136212
250	28754	33713	31760	39713	33666	382462	247378	179816	204951	262408	239167	246285	136194
280	34551	34028	29635	24435	34253	355307	274457	187825	213618	246774	236194	250698	124485
310	31813	33235	31511	24793	35051	380902	258591	168201	210913	260970	234852	248966	123547
320	32721	35185	32938	25284	33320	369203	215141	165314	211696	257170	219598	235917	125041
620	40474	45105	57184	39137	41020	404357	317204	188471	217020	276596	220611	248465	127295
920	50638	62064	55658	46076	46278	408138	299766	207369	212107	266650	241010	267725	127034
1220	56541	65667	66167	53980	48990	382651	398135	204134	219007	290808	270354	259359	126897
1520	54087	67530	62138	52195	58392	387888	386732	202312	223172	283392	279671	256516	148551
1820	46703	72975	65199	70038	71917	390908	400459	196833	215882	305718	275423	276882	147720
2120	53122	76699	68805	76679	73131	394294	385772	196758	212573	314664	251344	257250	158966
2420	87496	85891	72546	70457	78371	414247	423855	189489	201048	287326	241292	242680	164000
2720	84431	83040	71243	80350	92265	358850	398144	161662	206691	266113	246967	238824	165064
3020	76709	87811	95998	74897	84878	348820	443813	197958	216526	299186	238667	249500	160854
3320	74251	91487	93107	72668	87427	374903	431311	184569	202930	306487	225144	233345	155590
3620	78189	102840	69491	90638	84426	401147	445985	180675	192184	297015	211907	226319	153095
3920	76816	112381	74782	75560	89878	369649	406517	170059	166111	280837	218606	208739	166745
4220	83751	108663	79709	70118	97812	357558	404822	163903	164333	287257	193557	191765	180486
4520	83108	122051	108363	82164	92172	344930	422213	179172	163534	291650	211893	218319	171914
	AVERAGE OF PREBLEACH
	244329	227773	356831	237276	233898	431668	302971	198404	225515	273665	241349	288025	143556
NORMALIZED DATA
time	b1	b2	b3	b4	b5	c1	c2	c3	c4	c5	c6	c7	c8	Average of controls
120	1	1	1	1	1	1	1	1	1	1	1	1	1	1
130	0.0587322	0.0787757	0.0426897	0.025738	0.0460714	0.8861	0.905773	0.947691	0.950606	0.973022	0.914162	0.959507	0.898568	0.929429
160	0.09664	0.109943	0.0630635	0.0600019	0.0991331	0.896612	0.90002	0.958598	0.952252	0.914143	0.956189	0.99324	0.938315	0.938671
190	0.10801	0.130946	0.0550092	0.0865069	0.143931	0.900272	1.00153	0.993935	0.965031	0.909897	0.942424	0.872959	0.918999	0.938131
220	0.121721	0.140732	0.0772915	0.0928623	0.126111	0.900884	0.849516	0.918599	0.942997	0.967007	0.952783	0.904557	0.948841	0.923148
250	0.117685	0.148011	0.0890057	0.16737	0.143935	0.886009	0.816507	0.906311	0.908813	0.958866	0.99096	0.855082	0.948716	0.908908
280	0.141412	0.149394	0.0830505	0.102981	0.146444	0.823102	0.905885	0.946678	0.947245	0.901738	0.978642	0.870404	0.867152	0.905106
310	0.130205	0.145913	0.0883079	0.10449	0.149856	0.882395	0.853517	0.847768	0.93525	0.953611	0.973081	0.86439	0.860618	0.896329
320	0.133922	0.154474	0.092307	0.106559	0.142456	0.855293	0.710104	0.833217	0.938722	0.939726	0.909878	0.819085	0.871025	0.859631
620	0.165653	0.198026	0.160255	0.164943	0.175376	0.936731	1.04698	0.949934	0.962331	1.01071	0.914075	0.862651	0.886726	0.946267
920	0.207253	0.272482	0.155979	0.194187	0.197856	0.94549	0.989421	1.04518	0.940545	0.974366	0.998596	0.92952	0.884908	0.963504
1220	0.231413	0.2883	0.18543	0.227499	0.209451	0.886447	1.3141	1.02888	0.971142	1.06264	1.12018	0.900474	0.883953	1.02098
1520	0.221369	0.296479	0.174138	0.219976	0.249648	0.898579	1.27646	1.0197	0.98961	1.03554	1.15878	0.890603	1.03479	1.03801
1820	0.191148	0.320384	0.182717	0.295175	0.307472	0.905575	1.32177	0.99208	0.957284	1.11712	1.14118	0.961312	1.029	1.05317
2120	0.21742	0.336734	0.192822	0.323164	0.312662	0.913419	1.2733	0.991702	0.942611	1.14981	1.04141	0.893152	1.10734	1.03909
2420	0.358107	0.37709	0.203306	0.296941	0.335065	0.959642	1.39899	0.955065	0.891506	1.04992	0.999765	0.842566	1.14241	1.02998
2720	0.345562	0.364573	0.199655	0.338635	0.394467	0.83131	1.31413	0.814811	0.916529	0.972404	1.02328	0.829178	1.14982	0.981433
3020	0.313957	0.385519	0.269029	0.315654	0.362885	0.808074	1.46487	0.99775	0.96014	1.09326	0.988888	0.866244	1.12049	1.03746
3320	0.303897	0.401658	0.260927	0.306259	0.373783	0.868498	1.4236	0.930267	0.899851	1.11993	0.932857	0.810155	1.08383	1.00862
3620	0.320015	0.451502	0.194745	0.381994	0.360953	0.929295	1.47204	0.91064	0.852201	1.08532	0.878011	0.785762	1.06645	0.997464
3920	0.314395	0.49339	0.209573	0.318448	0.384262	0.856327	1.34177	0.857133	0.736585	1.02621	0.905768	0.724725	1.16153	0.951256
4220	0.342779	0.477067	0.22338	0.295512	0.418183	0.828317	1.33617	0.826106	0.728701	1.04967	0.80198	0.665793	1.25725	0.936748
4520	0.340147	0.535844	0.303682	0.34628	0.39407	0.799063	1.39357	0.903065	0.725158	1.06572	0.877953	0.757986	1.19754	0.965007
CORRECTED DATA
Time	b1	b2	b3	b4	b5
120	1	1	1	1	1
130	0.0631917	0.0847572	0.0459311	0.0276922	0.0495696
160	0.102954	0.117126	0.0671838	0.0639221	0.10561
190	0.115133	0.139582	0.0586371	0.0922119	0.153423
220	0.131854	0.152448	0.083726	0.100593	0.136609
250	0.12948	0.162845	0.097926	0.184145	0.15836
280	0.156238	0.165057	0.0917578	0.113778	0.161798
310	0.145265	0.162789	0.0985218	0.116576	0.167189
320	0.15579	0.179698	0.10738	0.123959	0.165717
620	0.17506	0.209271	0.169355	0.174309	0.185334
920	0.215103	0.282803	0.161887	0.201543	0.20535
1220	0.226658	0.282376	0.18162	0.222825	0.205147
1520	0.213263	0.285623	0.167762	0.211921	0.240506
1820	0.181498	0.304211	0.173493	0.280274	0.29195
2120	0.20924	0.324065	0.185568	0.311005	0.300899
2420	0.347682	0.366113	0.197388	0.288297	0.325312
2720	0.3521	0.37147	0.203432	0.345042	0.40193
3020	0.30262	0.371598	0.259314	0.304255	0.349781
3320	0.301299	0.398224	0.258696	0.303641	0.370587
3620	0.320828	0.452649	0.19524	0.382965	0.36187
3920	0.330506	0.518672	0.220312	0.334766	0.403953
4220	0.365924	0.509279	0.238463	0.315466	0.44642
4520	0.352482	0.555275	0.314694	0.358837	0.40836
	Normalize the bouton fluorescent right after bleaching to 0
Recovery Time_(sec)	b1	b2	b3	b4	b5
0	0	0	0	0	0
30	0.0424445	0.0353663	0.0222758	0.0372618	0.0589632
60	0.0554451	0.0599018	0.0133177	0.0663573	0.10927
90	0.0732941	0.0739594	0.0396144	0.0749771	0.0915793
120	0.0707597	0.0853195	0.0544981	0.160908	0.114464
150	0.0993222	0.0877363	0.0480329	0.0885379	0.118082
180	0.0876097	0.0852583	0.0551225	0.0914149	0.123754
190	0.098844	0.103733	0.064407	0.099009	0.122205
490	0.119414	0.136044	0.129366	0.150793	0.142846
790	0.162159	0.216386	0.121538	0.178802	0.163905
1090	0.174493	0.21592	0.142221	0.20069	0.163692
1390	0.160194	0.219467	0.127696	0.189476	0.200895
1690	0.126287	0.239776	0.133703	0.259775	0.255022
1990	0.155899	0.261469	0.146359	0.291382	0.264437
2290	0.303681	0.307411	0.158748	0.268027	0.290123
2590	0.308396	0.313265	0.165083	0.326388	0.370738
2890	0.255578	0.313404	0.223656	0.284439	0.315869
3190	0.254168	0.342496	0.223008	0.283808	0.33776
3490	0.275015	0.401961	0.156497	0.365391	0.328589
3790	0.285345	0.474098	0.182776	0.315819	0.372866
4090	0.323153	0.463836	0.201801	0.29597	0.417548
4390	0.308804	0.514091	0.281701	0.340576	0.377503

## Sheet: WT 9jan F4
	IntDen(b1)	IntDen(b2)	IntDen(b3)	IntDen(b4)	IntDen(b5)	IntDen(background)	IntDen(c1)	IntDen(c2)	IntDen(c3)	IntDen(c4)	IntDen(c5)	IntDen(c6)	IntDen(c7)	IntDen(c8)
0	282724	350384	312761	270471	344803	8316	224231	514206	158565	360293	176062	230800	193614	224891
30	286217	354532	296789	264857	361292	7555	226343	476615	161620	335009	166799	228718	215008	227969
60	276172	342558	326478	246100	350011	7657	231258	472690	158838	347606	178774	240486	219791	212958
90	264321	348139	302084	236963	354226	7310	223205	473622	163588	347807	175820	227221	210741	211757
120	264226	328946	310720	235758	345578	7933	231456	487432	161540	346152	175693	243375	205634	208598
130	17994	25125	50717	15141	30257	8140	208248	448288	158372	335651	167913	233640	208944	191329
160	28191	40702	61568	22227	46732	6953	206773	449483	152419	337541	162959	228201	212063	194598
190	31107	67009	69055	26905	57968	7568	206988	458639	152888	336054	156014	218943	207460	197492
220	31361	74769	72253	27582	55091	7073	204160	424794	151000	316685	167141	223217	213370	199455
250	32810	78384	79408	27756	64930	7644	193865	443393	160513	307791	164001	229337	198905	190857
280	39039	79715	80108	27625	67219	7630	207125	442414	151157	317949	161694	231963	199592	194986
310	36123	82244	79322	34291	68207	7640	211205	437945	150842	321009	145361	206280	217958	183714
320	36458	79200	83626	35052	71434	7142	209977	424885	150525	314435	146089	210090	206739	196134
620	48186	118068	116198	41462	78329	7190	216254	418987	153466	318561	158346	207809	222259	203479
920	56425	116566	120571	48012	86904	7545	221456	437063	140922	307438	172352	186085	240520	196712
1220	86150	124993	125980	53922	95523	7630	208833	442989	146882	315492	184193	199268	248227	203749
1520	118816	158572	161692	54715	94911	6876	214639	443544	128608	315471	175061	218204	278662	201668
1820	96322	152461	159464	59453	110834	6338	215763	448272	118107	273105	169729	219340	305486	205380
2120	115294	160413	150579	55926	108514	6421	220091	477394	138157	291233	181673	201404	274958	197813
2420	137232	187999	150583	67686	101761	6697	201945	458385	149897	298304	178915	196861	275830	187216
2720	139358	157527	162002	71875	95149	5837	186417	488462	137421	302552	195769	198886	285712	185346
3020	148168	176244	201620	75399	96597	7922	191660	481557	144629	320502	184321	179691	248836	195843
3320	144977	179600	194840	78357	88851	6966	208196	457176	137037	276046	195624	196609	270399	187797
3620	142889	167805	164274	74515	93116	6559	189639	475707	133102	281484	180310	187899	244719	196536
3920	165519	219164	192195	89113	106166	7194	199044	478798	142308	285607	203026	203990	247758	184295
4220	183223	215405	189071	75355	112561	6946	174336	477556	141110	282020	207159	195262	235459	197581
4520	170251	186574	178665	90062	113196	7261	193488	435531	132088	274448	198688	209363	240576	196593
time
0	274408	342068	304445	262155	336487	215915	505890	150249	351977	167746	222484	185298	216575
30	278662	346977	289234	257302	353737	218788	469060	154065	327454	159244	221163	207453	220414
60	268515	334901	318821	238443	342354	223601	465033	151181	339949	171117	232829	212134	205301
90	257011	340829	294774	229653	346916	215895	466312	156278	340497	168510	219911	203431	204447
120	256293	321013	302787	227825	337645	223523	479499	153607	338219	167760	235442	197701	200665
130	9854	16985	42577	7001	22117	200108	440148	150232	327511	159773	225500	200804	183189
160	21238	33749	54615	15274	39779	199820	442530	145466	330588	156006	221248	205110	187645
190	23539	59441	61487	19337	50400	199420	451071	145320	328486	148446	211375	199892	189924
220	24288	67696	65180	20509	48018	197087	417721	143927	309612	160068	216144	206297	192382
250	25166	70740	71764	20112	57286	186221	435749	152869	300147	156357	221693	191261	183213
280	31409	72085	72478	19995	59589	199495	434784	143527	310319	154064	224333	191962	187356
310	28483	74604	71682	26651	60567	203565	430305	143202	313369	137721	198640	210318	176074
320	29316	72058	76484	27910	64292	202835	417743	143383	307293	138947	202948	199597	188992
620	40996	110878	109008	34272	71139	209064	411797	146276	311371	151156	200619	215069	196289
920	48880	109021	113026	40467	79359	213911	429518	133377	299893	164807	178540	232975	189167
1220	78520	117363	118350	46292	87893	201203	435359	139252	307862	176563	191638	240597	196119
1520	111940	151696	154816	47839	88035	207763	436668	121732	308595	168185	211328	271786	194792
1820	89984	146123	153126	53115	104496	209425	441934	111769	266767	163391	213002	299148	199042
2120	108873	153992	144158	49505	102093	213670	470973	131736	284812	175252	194983	268537	191392
2420	130535	181302	143886	60989	95064	195248	451688	143200	291607	172218	190164	269133	180519
2720	133521	151690	156165	66038	89312	180580	482625	131584	296715	189932	193049	279875	179509
3020	140246	168322	193698	67477	88675	183738	473635	136707	312580	176399	171769	240914	187921
3320	138011	172634	187874	71391	81885	201230	450210	130071	269080	188658	189643	263433	180831
3620	136330	161246	157715	67956	86557	183080	469148	126543	274925	173751	181340	238160	189977
3920	158325	211970	185001	81919	98972	191850	471604	135114	278413	195832	196796	240564	177101
4220	176277	208459	182125	68409	105615	167390	470610	134164	275074	200213	188316	228513	190635
4520	162990	179313	171404	82801	105935	186227	428270	124827	267187	191427	202102	233315	189332
	AVERAGE OF PREBLEACH
	266978	337158	302012	243076	343428	219544	477159	153076	339619	166875	226366	201203	209480
NORMALIZED DATA
time	b1	b2	b3	b4	b5	c1	c2	c3	c4	c5	c6	c7	c8	Average of controls
120	1	1	1	1	1	1	1	1	1	1	1	1	1	1
130	0.0369094	0.050377	0.140978	0.0288017	0.0644007	0.911469	0.922435	0.981421	0.964348	0.957439	0.996175	0.998015	0.874492	0.950724
160	0.0795497	0.100099	0.180837	0.0628364	0.115829	0.910158	0.927427	0.950286	0.973408	0.934865	0.977391	1.01942	0.895764	0.948589
190	0.0881684	0.1763	0.203591	0.0795514	0.146756	0.908336	0.945327	0.949332	0.967219	0.889562	0.933776	0.993482	0.906643	0.93671
220	0.0909739	0.200784	0.215819	0.0843729	0.13982	0.897709	0.875434	0.940232	0.911645	0.959207	0.954844	1.02532	0.918377	0.935345
250	0.0942625	0.209813	0.23762	0.0827397	0.166807	0.848216	0.913216	0.998648	0.883775	0.936969	0.979357	0.950585	0.874607	0.923172
280	0.117646	0.213802	0.239984	0.0822584	0.173512	0.908677	0.911194	0.937619	0.913726	0.923228	0.99102	0.954069	0.894384	0.92924
310	0.106687	0.221273	0.237348	0.109641	0.17636	0.927216	0.901807	0.935496	0.922707	0.825292	0.877518	1.0453	0.840527	0.909483
320	0.109807	0.213722	0.253248	0.11482	0.187207	0.923891	0.87548	0.936679	0.904816	0.832639	0.896549	0.992016	0.902194	0.908033
620	0.153556	0.328861	0.360939	0.140993	0.207144	0.952263	0.863019	0.955578	0.916824	0.905802	0.88626	1.06891	0.937028	0.935711
920	0.183086	0.323353	0.374243	0.166479	0.231079	0.97434	0.900157	0.871312	0.883027	0.987605	0.788723	1.15791	0.90303	0.933263
1220	0.294107	0.348095	0.391872	0.190443	0.255929	0.916457	0.912399	0.909692	0.906492	1.05805	0.846585	1.19579	0.936216	0.96021
1520	0.419286	0.449926	0.512615	0.196807	0.256342	0.946337	0.915142	0.795239	0.90865	1.00785	0.933569	1.3508	0.929882	0.973434
1820	0.337047	0.433397	0.507019	0.218512	0.304274	0.953907	0.926178	0.730154	0.785489	0.97912	0.940964	1.48679	0.95017	0.969097
2120	0.407798	0.456736	0.477325	0.203661	0.297276	0.973243	0.987036	0.860592	0.838622	1.0502	0.861362	1.33465	0.913651	0.97742
2420	0.488936	0.537737	0.476424	0.250905	0.276809	0.889333	0.94662	0.935483	0.858629	1.03202	0.840074	1.33762	0.861746	0.96269
2720	0.50012	0.449908	0.517082	0.271677	0.26006	0.822522	1.01146	0.859599	0.87367	1.13817	0.852819	1.39101	0.856925	0.97577
3020	0.52531	0.499238	0.641358	0.277597	0.258206	0.836906	0.992615	0.893066	0.920384	1.05707	0.758812	1.19737	0.897082	0.944162
3320	0.516938	0.512028	0.622074	0.293699	0.238434	0.91658	0.943522	0.849715	0.792299	1.13053	0.837772	1.30929	0.863236	0.955368
3620	0.510642	0.478251	0.522214	0.279567	0.252038	0.833909	0.983211	0.826668	0.80951	1.0412	0.801093	1.18368	0.906896	0.923271
3920	0.593027	0.628697	0.612561	0.33701	0.288189	0.873855	0.988359	0.88266	0.81978	1.17352	0.869372	1.19563	0.84543	0.956075
4220	0.660268	0.618284	0.603039	0.281431	0.307532	0.762443	0.986275	0.876454	0.809948	1.19978	0.83191	1.13573	0.910037	0.939072
4520	0.6105	0.531837	0.56754	0.340639	0.308464	0.848243	0.897542	0.815458	0.786725	1.14713	0.892812	1.1596	0.903817	0.931415
CORRECTED DATA
Time	b1	b2	b3	b4	b5			Filter out due to large abrupt change or wrong targeting.
120	1	1	1	1	1
130	0.0388224	0.0529881	0.148285	0.0302945	0.0677386
160	0.083861	0.105524	0.190638	0.066242	0.122107
190	0.0941256	0.188212	0.217347	0.0849264	0.156672
220	0.0972623	0.214663	0.230737	0.0902051	0.149485
250	0.102107	0.227274	0.257395	0.0896255	0.180689
280	0.126605	0.230083	0.258258	0.0885222	0.186725
310	0.117305	0.243296	0.26097	0.120553	0.193913
320	0.120928	0.235368	0.278897	0.126449	0.206167
620	0.164106	0.351456	0.385738	0.15068	0.221376
920	0.196179	0.346476	0.401005	0.178384	0.247603
1220	0.306294	0.36252	0.40811	0.198334	0.266534
1520	0.430729	0.462205	0.526605	0.202178	0.263338
1820	0.347795	0.447217	0.523187	0.22548	0.313976
2120	0.417219	0.467287	0.488352	0.208366	0.304144
2420	0.507885	0.558577	0.494889	0.26063	0.287537
2720	0.512539	0.46108	0.529922	0.278423	0.266518
3020	0.556376	0.528763	0.679288	0.294014	0.273476
3320	0.541088	0.535948	0.651136	0.307419	0.249573
3620	0.553079	0.517997	0.565613	0.302801	0.272984
3920	0.620272	0.657581	0.640704	0.352494	0.301429
4220	0.703107	0.658399	0.642165	0.299691	0.327485
4520	0.655455	0.570999	0.609331	0.365722	0.331177
	Normalize the bouton fluorescent right after bleaching to 0
Recovery Time_(sec)	b1	b2	b3	b4	b5
0	0	0	0	0	0
30	0.0468577	0.0554751	0.0497271	0.0370705	0.0583187
60	0.0575369	0.142791	0.0810864	0.0563386	0.0953948
90	0.0608003	0.170722	0.0968078	0.0617822	0.0876857
120	0.065841	0.184038	0.128106	0.0611845	0.121157
150	0.0913282	0.187004	0.12912	0.0600468	0.127632
180	0.0816524	0.200956	0.132304	0.0930781	0.135342
190	0.0854222	0.192585	0.153353	0.0991589	0.148487
490	0.130344	0.315168	0.278794	0.124147	0.164801
790	0.163712	0.309909	0.296719	0.152716	0.192934
1090	0.278275	0.326851	0.305061	0.17329	0.21324
1390	0.407736	0.432114	0.444186	0.177254	0.209812
1690	0.321452	0.416287	0.440174	0.201284	0.26413
1990	0.39368	0.437481	0.399274	0.183635	0.253583
2290	0.488008	0.533878	0.406948	0.237531	0.235769
2590	0.49285	0.430926	0.44808	0.25588	0.213223
2890	0.538458	0.502396	0.623452	0.271958	0.220686
3190	0.522552	0.509983	0.590398	0.285783	0.195047
3490	0.535028	0.491027	0.489986	0.28102	0.220159
3790	0.604935	0.638422	0.57815	0.332265	0.25067
4090	0.691116	0.639285	0.579865	0.277812	0.27862
4390	0.641538	0.546996	0.541315	0.345906	0.282581

## Sheet: DQL 8feb F2
time	b1	b2	b3	b4	b5	background	c1	c2	c3	c4	c5	c6	c7	c8
0	447795	373553	311961	290564	298401	4506	299361	182924	152437	136177	196474	163123	254947	247310
30	454916	367132	307080	284849	303097	5010	291647	165478	144777	145767	193874	167979	251416	242479
60	374948	374210	325866	290267	287811	4272	287501	166323	149182	133674	188874	154179	222493	208020
90	390300	375754	302928	278385	287693	4073	276442	163935	151619	135642	186616	163556	237104	219746
120	390131	369124	326741	301708	283099	4423	278632	155223	146407	133463	187770	162465	228488	227960
130	42353	40885	37423	18868	23329	4807	275731	139772	149545	118424	184276	167433	229775	220535
160	60126	58138	44389	29810	37400	5011	277129	142427	151062	120039	188608	159500	228882	215705
190	69544	61545	51387	35129	43888	4964	266157	140823	158381	120764	183675	162590	229865	217645
220	74012	67818	54179	40144	42636	4038	256269	143921	159504	117893	179217	163724	234403	214440
250	101328	67900	59101	45828	42427	5426	259395	146984	163505	127792	181976	162768	222141	218427
280	107398	71714	59182	43670	44776	3595	261329	151578	166540	121706	178798	168410	227311	227046
310	98600	81677	61709	46001	43323	5737	250786	149073	165507	130675	179682	150382	222192	217849
320	97359	82985	63851	46051	44656	5008	255466	146473	158864	131961	184115	156255	220589	217472
620	147993	100622	80217	59536	59368	4011	253206	158757	163765	140172	192926	171193	276477	219646
920	188382	97971	83753	75636	61851	5014	247992	168259	147948	138888	184571	153378	297226	212997
1220	202795	90965	89042	92573	71007	3802	252205	148981	193351	149619	195213	158471	230153	224938
1520	212551	78893	92494	97992	70059	3752	254147	152071	183045	158593	199714	156001	222486	226500
1820	254896	73361	88659	100899	83512	5106	246372	154842	181833	154888	194771	151506	241802	221067
2120	253033	68424	83946	108727	91138	4910	258862	161817	189482	202745	194947	184519	247122	215387
2420	247211	69306	85829	115467	91923	4553	264100	162681	206598	130771	200608	168050	255276	214707
2720	352669	83972	103801	127951	92296	3232	239835	166129	200255	132664	197091	178194	244263	219075
3020	268922	76431	88476	133166	105766	4196	248843	159334	187189	122606	187346	168713	246256	218640
3320	280766	75642	91725	136975	104009	3771	231561	169185	182207	122447	193000	182157	246496	226495
3620	285609	79240	86893	149191	99500	4476	254563	167391	185239	134908	190028	178388	245409	194845
3920	302269	86822	90474	150982	95262	4746	260127	162192	166667	138393	191770	186175	225322	196847
4220	294072	78665	104849	144452	101766	3965	236327	161228	170481	125130	190280	190603	227520	208272
4520	295243	81470	101598	148441	115772	3763	210143	171383	171845	127412	188314	186719	230973	229898
time
0	443289	369047	307455	286058	293895	294855	178418	147931	131671	191968	158617	250441	242804
30	449906	362122	302070	279839	298087	286637	160468	139767	140757	188864	162969	246406	237469
60	370676	369938	321594	285995	283539	283229	162051	144910	129402	184602	149907	218221	203748
90	386227	371681	298855	274312	283620	272369	159862	147546	131569	182543	159483	233031	215673
120	385708	364701	322318	297285	278676	274209	150800	141984	129040	183347	158042	224065	223537
130	37546	36078	32616	14061	18522	270924	134965	144738	113617	179469	162626	224968	215728
160	55115	53127	39378	24799	32389	272118	137416	146051	115028	183597	154489	223871	210694
190	64580	56581	46423	30165	38924	261193	135859	153417	115800	178711	157626	224901	212681
220	69974	63780	50141	36106	38598	252231	139883	155466	113855	175179	159686	230365	210402
250	95902	62474	53675	40402	37001	253969	141558	158079	122366	176550	157342	216715	213001
280	103803	68119	55587	40075	41181	257734	147983	162945	118111	175203	164815	223716	223451
310	92863	75940	55972	40264	37586	245049	143336	159770	124938	173945	144645	216455	212112
320	92351	77977	58843	41043	39648	250458	141465	153856	126953	179107	151247	215581	212464
620	143982	96611	76206	55525	55357	249195	154746	159754	136161	188915	167182	272466	215635
920	183368	92957	78739	70622	56837	242978	163245	142934	133874	179557	148364	292212	207983
1220	198993	87163	85240	88771	67205	248403	145179	189549	145817	191411	154669	226351	221136
1520	208799	75141	88742	94240	66307	250395	148319	179293	154841	195962	152249	218734	222748
1820	249790	68255	83553	95793	78406	241266	149736	176727	149782	189665	146400	236696	215961
2120	248123	63514	79036	103817	86228	253952	156907	184572	197835	190037	179609	242212	210477
2420	242658	64753	81276	110914	87370	259547	158128	202045	126218	196055	163497	250723	210154
2720	349437	80740	100569	124719	89064	236603	162897	197023	129432	193859	174962	241031	215843
3020	264726	72235	84280	128970	101570	244647	155138	182993	118410	183150	164517	242060	214444
3320	276995	71871	87954	133204	100238	227790	165414	178436	118676	189229	178386	242725	222724
3620	281133	74764	82417	144715	95024	250087	162915	180763	130432	185552	173912	240933	190369
3920	297523	82076	85728	146236	90516	255381	157446	161921	133647	187024	181429	220576	192101
4220	290107	74700	100884	140487	97801	232362	157263	166516	121165	186315	186638	223555	204307
4520	291480	77707	97835	144678	112009	206380	167620	168082	123649	184551	182956	227210	226135
	AVERAGE OF PREBLEACH
	407161	367498	310458	284698	287563	282260	162320	144428	132488	186265	157804	234433	224646
NORMALIZED DATA
time	b1	b2	b3	b4	b5	c1	c2	c3	c4	c5	c6	c7	c8	Average of controls
120	1	1	1	1	1	1	1	1	1	1	1	1	1	1
130	0.0922141	0.098172	0.105058	0.0493892	0.0644101	0.959839	0.831476	1.00215	0.857566	0.963515	1.03056	0.959627	0.960301	0.945629
160	0.135364	0.144564	0.126838	0.0871064	0.112633	0.964069	0.846576	1.01124	0.868216	0.985677	0.978995	0.954947	0.937893	0.943452
190	0.15861	0.153963	0.149531	0.105954	0.135358	0.925364	0.836984	1.06224	0.874043	0.959446	0.998875	0.959341	0.946738	0.945379
220	0.171858	0.173552	0.161506	0.126822	0.134224	0.893613	0.861774	1.07643	0.859362	0.940484	1.01193	0.982648	0.936593	0.945354
250	0.235538	0.169998	0.17289	0.141912	0.128671	0.89977	0.872093	1.09452	0.923602	0.947844	0.997075	0.924423	0.948162	0.950936
280	0.254943	0.185359	0.179048	0.140763	0.143207	0.913109	0.911676	1.12821	0.891486	0.940613	1.04443	0.954286	0.99468	0.972312
310	0.228074	0.206641	0.180288	0.141427	0.130705	0.868168	0.883047	1.10623	0.943015	0.933859	0.916614	0.923314	0.944205	0.939806
320	0.226817	0.212184	0.189536	0.144163	0.137876	0.887331	0.87152	1.06528	0.958224	0.961572	0.958451	0.919585	0.945772	0.945967
620	0.353624	0.262889	0.245463	0.195031	0.192504	0.882857	0.95334	1.10612	1.02772	1.01423	1.05943	1.16223	0.959887	1.02073
920	0.450357	0.252946	0.253622	0.24806	0.19765	0.860831	1.0057	0.989658	1.01046	0.963988	0.940181	1.24646	0.925825	0.992889
1220	0.488733	0.23718	0.274562	0.311808	0.233705	0.880051	0.894401	1.31242	1.10061	1.02763	0.980136	0.965526	0.984375	1.01814
1520	0.512817	0.204467	0.285842	0.331018	0.230582	0.887108	0.913746	1.2414	1.16872	1.05206	0.964801	0.933035	0.99155	1.01905
1820	0.613492	0.185729	0.269128	0.336473	0.272656	0.854766	0.922475	1.22364	1.13053	1.01825	0.927735	1.00965	0.961338	1.00605
2120	0.609397	0.172828	0.254578	0.364657	0.299857	0.89971	0.966653	1.27796	1.49323	1.02025	1.13818	1.03318	0.936927	1.09576
2420	0.595975	0.1762	0.261794	0.389585	0.303829	0.919532	0.974176	1.39894	0.952676	1.05256	1.03608	1.06949	0.935489	1.04237
2720	0.858228	0.219702	0.323937	0.438075	0.30972	0.838245	1.00356	1.36416	0.976935	1.04077	1.10873	1.02815	0.960813	1.04017
3020	0.650175	0.196559	0.27147	0.453007	0.353209	0.866744	0.955755	1.26702	0.893743	0.983278	1.04254	1.03253	0.954585	0.999526
3320	0.680308	0.195569	0.283304	0.467879	0.348577	0.807022	1.01906	1.23547	0.89575	1.01591	1.13043	1.03537	0.991443	1.01631
3620	0.690471	0.203441	0.265469	0.508311	0.330445	0.886017	1.00367	1.25158	0.984483	0.996173	1.10208	1.02773	0.847417	1.01239
3920	0.730725	0.223337	0.276134	0.513653	0.314769	0.904773	0.969974	1.12112	1.00875	1.00408	1.14971	0.940892	0.855127	0.994303
4220	0.712511	0.203267	0.324952	0.49346	0.340102	0.82322	0.968847	1.15294	0.914537	1.00027	1.18272	0.953599	0.909461	0.988199
4520	0.715884	0.211449	0.315131	0.508181	0.389511	0.73117	1.03265	1.16378	0.933286	0.990799	1.15939	0.96919	1.00663	0.998362
CORRECTED DATA
Time	b1	b2	b3	b4	b5			Filter out due to large abrupt change or wrong targeting.
120	1	1	1	1	1
130	0.0975161	0.103817	0.111098	0.0522289	0.0681135
160	0.143477	0.153229	0.134441	0.0923274	0.119383
190	0.167774	0.162858	0.15817	0.112076	0.143179
220	0.181792	0.183584	0.170842	0.134153	0.141983
250	0.247691	0.178769	0.18181	0.149234	0.13531
280	0.262203	0.190637	0.184147	0.144772	0.147285
310	0.242682	0.219876	0.191836	0.150485	0.139077
320	0.239772	0.224303	0.200362	0.152398	0.145751
620	0.346443	0.25755	0.240478	0.191071	0.188595
920	0.453583	0.254757	0.255438	0.249836	0.199066
1220	0.480024	0.232953	0.269669	0.306252	0.229541
1520	0.503229	0.200644	0.280498	0.324829	0.226271
1820	0.609803	0.184612	0.26751	0.334449	0.271017
2120	0.556141	0.157724	0.23233	0.332788	0.273652
2420	0.571752	0.169038	0.251153	0.37375	0.29148
2720	0.825084	0.211217	0.311427	0.421157	0.297758
3020	0.650484	0.196652	0.271598	0.453222	0.353377
3320	0.669391	0.19243	0.278758	0.460371	0.342984
3620	0.682019	0.20095	0.262219	0.502088	0.3264
3920	0.734912	0.224617	0.277716	0.516596	0.316572
4220	0.72102	0.205694	0.328832	0.499353	0.344164
4520	0.717058	0.211796	0.315648	0.509015	0.39015
	Normalize the bouton fluorescent right after bleaching to 0
Recovery Time_(sec)	b1	b2	b3	b4	b5
0	0	0	0	0	0
30	0.0509276	0.0551364	0.0262599	0.0423081	0.0550174
60	0.0778499	0.0658813	0.052955	0.0631453	0.0805517
90	0.0933827	0.0890081	0.0672111	0.0864387	0.0792688
120	0.166401	0.0836355	0.0795495	0.10235	0.0721075
150	0.182482	0.0968783	0.0821787	0.0976426	0.084958
180	0.160852	0.129504	0.0908282	0.103671	0.0761499
190	0.157627	0.134444	0.10042	0.105689	0.0833122
490	0.275824	0.171543	0.145551	0.146493	0.129287
790	0.394541	0.168426	0.16238	0.208497	0.140524
1090	0.423839	0.144096	0.17839	0.268021	0.173226
1390	0.449551	0.108044	0.190572	0.287622	0.169717
1690	0.567641	0.0901552	0.17596	0.297773	0.217734
1990	0.50818	0.0601525	0.136384	0.29602	0.220562
2290	0.525478	0.0727769	0.157559	0.33924	0.239692
2590	0.806183	0.119842	0.225367	0.389259	0.24643
2890	0.612717	0.10359	0.18056	0.42309	0.306114
3190	0.633668	0.098879	0.188614	0.430633	0.294961
3490	0.64766	0.108386	0.170009	0.47465	0.277166
3790	0.706268	0.134794	0.187442	0.489957	0.266619
4090	0.690875	0.113679	0.244947	0.471764	0.296227
4390	0.686485	0.120488	0.230115	0.481958	0.345575

## Sheet: DQL 9feb F2
time	b1	b2	b3	b4	b5	background	c1	c2	c3	c4	c5	c6	c7	c8
0	346844	257428	539240	281138	345176	2808	441845	291172	176424	396979	275371	279825	168421	382073
30	351583	257644	531715	277867	324695	3172	423189	284641	165168	398990	278868	284760	168909	375210
60	342074	247944	519381	284315	331362	2961	407663	283451	160842	402309	266966	280501	177108	370270
90	352184	240839	506909	285927	296543	2712	402902	275800	161109	400568	270186	267340	162072	367902
120	317769	255397	513466	269893	300113	2618	393463	273931	163232	397048	265478	261963	164021	369527
130	18118	15236	21756	19080	22152	3063	389940	264960	151222	395284	254751	258864	167843	353264
160	29415	29029	32516	31777	35093	3262	390787	268612	151001	388738	257688	257712	167469	356459
190	35861	34446	37365	36030	37915	3468	381604	242735	149101	381666	253524	256884	160654	348312
220	39904	35650	39301	39117	46115	2706	371964	246807	146812	377894	248540	254382	164114	348007
250	37529	36256	40153	40053	87978	3384	383894	249243	151156	380519	245992	251679	165996	344069
280	46538	39042	42853	41001	95876	3312	371391	256182	144432	365755	245230	240530	159507	337873
310	42205	41174	43112	45664	61214	2950	361373	249001	139348	356244	243646	242868	156001	339235
320	44967	42535	42802	43819	53817	3121	367035	250033	146614	354805	230662	236153	156024	316979
620	57717	62225	50202	55542	57901	3218	396688	257963	162173	355499	254146	242719	177279	339515
920	55397	69023	53386	71905	63131	3749	414636	237793	174145	348512	270284	243874	187542	338052
1220	67514	75073	53867	65660	83314	3636	396604	232989	163849	360330	239552	243688	166747	327908
1520	61124	88742	57288	74704	73794	3585	426954	243851	181774	337290	251446	231840	185498	305464
1820	73121	101057	56506	89513	80169	3360	426524	242749	176041	343370	254632	240013	189536	319182
2120	66856	99335	60347	94904	77206	3053	416465	229809	173099	340862	244247	235257	192521	333890
2420	61826	109646	59538	85826	85677	3302	430625	240336	174599	366417	245927	248384	183919	318667
2720	70757	113247	62104	89991	87086	3294	442893	247423	170591	358866	248170	253909	183173	316280
3020	65658	114467	63059	96198	89643	3103	430853	249740	192984	359414	243731	260079	186515	316221
3320	77486	108551	62143	97374	88632	2946	443439	257859	193957	343884	237279	250872	188396	268560
3620	76333	79366	65678	96719	94088	3351	420513	264927	190492	328167	225803	253009	194655	263059
3920	76657	68817	66568	114308	98379	3066	423022	259195	203847	330246	201990	260044	193637	291270
4220	73137	71580	74199	112909	122846	3185	397807	266578	207837	316357	215269	263281	178939	276584
4520	71602	69516	71196	100549	107639	3333	386902	266063	198484	306161	221205	261768	182759	308806
time
0	344036	254620	536432	278330	342368	439037	288364	173616	394171	272563	277017	165613	379265
30	348411	254472	528543	274695	321523	420017	281469	161996	395818	275696	281588	165737	372038
60	339113	244983	516420	281354	328401	404702	280490	157881	399348	264005	277540	174147	367309
90	349472	238127	504197	283215	293831	400190	273088	158397	397856	267474	264628	159360	365190
120	315151	252779	510848	267275	297495	390845	271313	160614	394430	262860	259345	161403	366909
130	15055	12173	18693	16017	19089	386877	261897	148159	392221	251688	255801	164780	350201
160	26153	25767	29254	28515	31831	387525	265350	147739	385476	254426	254450	164207	353197
190	32393	30978	33897	32562	34447	378136	239267	145633	378198	250056	253416	157186	344844
220	37198	32944	36595	36411	43409	369258	244101	144106	375188	245834	251676	161408	345301
250	34145	32872	36769	36669	84594	380510	245859	147772	377135	242608	248295	162612	340685
280	43226	35730	39541	37689	92564	368079	252870	141120	362443	241918	237218	156195	334561
310	39255	38224	40162	42714	58264	358423	246051	136398	353294	240696	239918	153051	336285
320	41846	39414	39681	40698	50696	363914	246912	143493	351684	227541	233032	152903	313858
620	54499	59007	46984	52324	54683	393470	254745	158955	352281	250928	239501	174061	336297
920	51648	65274	49637	68156	59382	410887	234044	170396	344763	266535	240125	183793	334303
1220	63878	71437	50231	62024	79678	392968	229353	160213	356694	235916	240052	163111	324272
1520	57539	85157	53703	71119	70209	423369	240266	178189	333705	247861	228255	181913	301879
1820	69761	97697	53146	86153	76809	423164	239389	172681	340010	251272	236653	186176	315822
2120	63803	96282	57294	91851	74153	413412	226756	170046	337809	241194	232204	189468	330837
2420	58524	106344	56236	82524	82375	427323	237034	171297	363115	242625	245082	180617	315365
2720	67463	109953	58810	86697	83792	439599	244129	167297	355572	244876	250615	179879	312986
3020	62555	111364	59956	93095	86540	427750	246637	189881	356311	240628	256976	183412	313118
3320	74540	105605	59197	94428	85686	440493	254913	191011	340938	234333	247926	185450	265614
3620	72982	76015	62327	93368	90737	417162	261576	187141	324816	222452	249658	191304	259708
3920	73591	65751	63502	111242	95313	419956	256129	200781	327180	198924	256978	190571	288204
4220	69952	68395	71014	109724	119661	394622	263393	204652	313172	212084	260096	175754	273399
4520	68269	66183	67863	97216	104306	383569	262730	195151	302828	217872	258435	179426	305473
	AVERAGE OF PREBLEACH
	339237	248996	519288	276974	316724	410958	278945	162501	396325	268520	272024	165252	370142
NORMALIZED DATA
time	b1	b2	b3	b4	b5	c1	c2	c3	c4	c5	c6	c7	c8	Average of controls
120	1	1	1	1	1	1	1	1	1	1	1	1	1	1
130	0.0443791	0.0488883	0.0359974	0.0578286	0.0602702	0.941402	0.938885	0.911743	0.989646	0.937317	0.940363	0.997144	0.946126	0.950328
160	0.0770937	0.103484	0.0563348	0.102952	0.100501	0.942979	0.951263	0.909159	0.972627	0.947514	0.935397	0.993676	0.95422	0.950854
190	0.0954879	0.124412	0.0652759	0.117563	0.10876	0.920133	0.857758	0.896199	0.954263	0.931239	0.931596	0.95119	0.931653	0.921754
220	0.109652	0.132307	0.0704715	0.13146	0.137056	0.898529	0.875087	0.886802	0.946668	0.915516	0.925199	0.976739	0.932887	0.919678
250	0.100652	0.132018	0.0708066	0.132392	0.267091	0.925909	0.881389	0.909362	0.951581	0.903502	0.91277	0.984024	0.920417	0.923619
280	0.127421	0.143496	0.0761446	0.136074	0.292255	0.89566	0.906523	0.868426	0.91451	0.900932	0.872049	0.945193	0.903872	0.900896
310	0.115716	0.153512	0.0773405	0.154217	0.183959	0.872164	0.882078	0.839368	0.891426	0.896381	0.881975	0.926167	0.908529	0.887261
320	0.123353	0.158292	0.0764142	0.146938	0.160064	0.885526	0.885164	0.883029	0.887364	0.847391	0.856661	0.925272	0.847939	0.877293
620	0.160652	0.23698	0.0904777	0.188913	0.172652	0.957445	0.913245	0.97818	0.88887	0.934487	0.880442	1.05331	0.908562	0.939317
920	0.152248	0.262149	0.0955866	0.246074	0.187488	0.999827	0.839033	1.04859	0.869901	0.992609	0.882736	1.1122	0.903175	0.956008
1220	0.188299	0.2869	0.0967305	0.223935	0.25157	0.956224	0.822216	0.985921	0.900005	0.87858	0.882468	0.987044	0.876074	0.911067
1520	0.169613	0.342001	0.103417	0.256772	0.221673	1.0302	0.861339	1.09654	0.841999	0.923065	0.8391	1.10082	0.815576	0.93858
1820	0.205641	0.392363	0.102344	0.311051	0.242511	1.0297	0.858195	1.06265	0.857908	0.935768	0.869972	1.12662	0.853245	0.949257
2120	0.188078	0.386681	0.110332	0.331623	0.234125	1.00597	0.812906	1.04643	0.852354	0.898236	0.853617	1.14654	0.893811	0.938733
2420	0.172517	0.427091	0.108294	0.297949	0.260085	1.03982	0.849752	1.05413	0.916206	0.903565	0.900959	1.09298	0.85201	0.951178
2720	0.198867	0.441585	0.113251	0.313015	0.264559	1.06969	0.875187	1.02951	0.897174	0.911948	0.921299	1.08851	0.845583	0.954864
3020	0.184399	0.447252	0.115458	0.336115	0.273235	1.04086	0.884179	1.16849	0.899038	0.896128	0.944683	1.10989	0.84594	0.973652
3320	0.219729	0.424123	0.113996	0.340928	0.270539	1.07187	0.913847	1.17545	0.860249	0.872685	0.911414	1.12223	0.7176	0.955667
3620	0.215136	0.305286	0.120024	0.3371	0.286486	1.0151	0.937734	1.15163	0.819571	0.828439	0.917781	1.15765	0.701644	0.941193
3920	0.216931	0.264064	0.122287	0.401634	0.300934	1.02189	0.918207	1.23557	0.825535	0.740817	0.94469	1.15321	0.77863	0.95232
4220	0.206204	0.274683	0.136753	0.396153	0.377809	0.960249	0.944248	1.25939	0.790191	0.789827	0.956152	1.06355	0.738632	0.93778
4520	0.201243	0.265799	0.130685	0.350993	0.329328	0.933353	0.941871	1.20092	0.764091	0.811382	0.950046	1.08577	0.825286	0.93909
CORRECTED DATA
Time	b1	b2	b3	b4	b5			Filter out due to large abrupt change or wrong targeting.
120	1	1	1	1	1
130	0.0466987	0.0514436	0.0378789	0.0608512	0.0634204
160	0.0810783	0.108832	0.0592465	0.108273	0.105695
190	0.103594	0.134973	0.0708171	0.127543	0.117993
220	0.119229	0.143862	0.0766262	0.142941	0.149026
250	0.108976	0.142936	0.0766621	0.14334	0.289179
280	0.141439	0.159282	0.084521	0.151043	0.324405
310	0.130419	0.173018	0.0871677	0.173812	0.207333
320	0.140607	0.180432	0.0871023	0.16749	0.182452
620	0.171031	0.252289	0.0963229	0.201118	0.183806
920	0.159254	0.274212	0.0999852	0.257397	0.196116
1220	0.20668	0.314906	0.106173	0.245794	0.276126
1520	0.180712	0.364381	0.110184	0.273574	0.236179
1820	0.216634	0.413337	0.107815	0.327679	0.255475
2120	0.200353	0.411917	0.117533	0.353267	0.249406
2420	0.181372	0.449013	0.113853	0.313242	0.273434
2720	0.208267	0.462459	0.118605	0.327811	0.277064
3020	0.189389	0.459355	0.118583	0.345211	0.280629
3320	0.229922	0.443798	0.119285	0.356743	0.283089
3620	0.228578	0.32436	0.127523	0.358163	0.304386
3920	0.227792	0.277285	0.128409	0.421742	0.316001
4220	0.219885	0.292908	0.145826	0.422437	0.402876
4520	0.214296	0.283039	0.139161	0.373759	0.350688
	Normalize the bouton fluorescent right after bleaching to 0
Recovery Time_(sec)	b1	b2	b3	b4	b5
0	0	0	0	0	0
30	0.0360638	0.0605009	0.0222089	0.0504946	0.0451376
60	0.0596822	0.0880591	0.034235	0.0710133	0.0582679
90	0.076083	0.0974311	0.0402728	0.0874091	0.0914028
120	0.0653282	0.0964539	0.0403101	0.0878336	0.241045
150	0.0993808	0.113686	0.0484785	0.096036	0.278657
180	0.0878215	0.128168	0.0512293	0.12028	0.153658
190	0.0985084	0.135984	0.0511613	0.113549	0.127092
490	0.130422	0.211738	0.060745	0.149355	0.128537
790	0.118069	0.23485	0.0645515	0.209281	0.141681
1090	0.167818	0.277751	0.0709827	0.196926	0.227109
1390	0.140579	0.32991	0.0751519	0.226506	0.184457
1690	0.17826	0.381521	0.0726894	0.284116	0.205059
1990	0.161181	0.380024	0.0827898	0.311363	0.198579
2290	0.14127	0.419131	0.0789652	0.268744	0.224235
2590	0.169484	0.433306	0.0839039	0.284257	0.228111
2890	0.149681	0.430034	0.083881	0.302784	0.231917
3190	0.192199	0.413633	0.0846108	0.315064	0.234543
3490	0.190789	0.287718	0.0931736	0.316576	0.257283
3790	0.189965	0.23809	0.0940946	0.384275	0.269684
4090	0.181671	0.254559	0.112197	0.385014	0.362442
4390	0.175807	0.244156	0.10527	0.333182	0.30672

## Sheet: DQL 9feb F3
time	b1	b2	b3	b4	b5	background	c1	c2	c3	c4	c5	c6	c7	c8
0	344972	472508	582970	216235	369559	7810	404547	265483	412997	325806	241070	436775	163407	383743
30	343918	466507	580996	223694	380471	7159	415759	258424	414258	326799	249190	454924	164050	301518
60	340034	470758	575570	217490	359804	9953	396531	249662	408424	336413	247148	433423	165220	383397
90	326803	459237	572585	217152	352359	10711	418587	250876	411314	347519	228979	390945	161836	380354
120	322811	467678	578317	214290	357658	12177	381837	258714	416728	326182	244043	405525	167712	384451
130	22379	23290	33511	11645	38077	10721	375435	250262	419709	315372	234746	377460	161809	363788
160	42661	34711	55216	21160	50207	8711	400333	247624	393605	317838	237227	366475	155420	372749
190	47057	40440	57178	24090	56822	5168	377320	259753	398126	332111	234045	381987	162115	352318
220	49904	43156	56801	27097	70107	6212	394826	240906	411281	316937	258523	366735	155222	370374
250	67667	50165	57836	28870	73821	5823	380476	229548	384311	310999	243763	364506	147446	367040
280	66212	55587	64677	29675	73523	7360	377783	251249	407419	308371	245839	386911	172205	352702
310	65710	57974	66729	36008	71028	8071	379109	248685	401709	318905	253072	381881	156515	358851
320	62582	57924	63728	36914	72400	5732	362640	237351	390965	307541	244647	370810	150142	343847
620	85274	105085	99622	34149	102467	9430	404530	243216	394703	329072	235170	412523	165563	350131
920	98140	131026	103873	59759	111900	9666	396360	226132	416368	337678	233916	405171	165770	342091
1220	111007	146935	118793	73392	135436	6349	402830	221133	430691	355119	221809	389893	157838	359642
1520	118445	176959	113284	90691	133089	7781	400426	220367	426045	372910	216804	385984	165112	356908
1820	113086	207939	142353	90667	148726	4415	383547	204447	418762	349092	239147	384361	158668	342109
2120	138225	234262	150756	101758	154702	6293	400521	213598	411458	340009	249047	403087	152241	330413
2420	147661	218891	156453	118591	148805	12463	377295	216632	389934	325636	254302	414825	168273	344134
2720	139103	237671	176289	121002	159875	8491	384498	213106	394787	301422	238153	403465	153628	329055
3020	134034	235519	183477	122717	155177	5594	373467	221927	404062	303929	240192	394397	159362	316846
3320	164255	242952	176153	132896	179006	13501	363398	210583	395359	312885	240742	391858	153255	323930
3620	144452	243968	181322	129802	188988	6341	374065	223698	385750	335724	248546	421883	146566	307568
3920	132319	246630	188189	133490	180961	5429	353672	216138	354067	334444	223144	436490	155289	303370
4220	146637	236572	178364	127467	191494	11054	342618	209555	407595	317734	238036	426178	148086	302891
4520	141908	247196	197001	116982	187023	4207	361049	207041	419546	311713	233358	438582	156931	269717
time
0	337162	464698	575160	208425	361749	396737	257673	405187	317996	233260	428965	155597	375933
30	336759	459348	573837	216535	373312	408600	251265	407099	319640	242031	447765	156891	294359
60	330081	460805	565617	207537	349851	386578	239709	398471	326460	237195	423470	155267	373444
90	316092	448526	561874	206441	341648	407876	240165	400603	336808	218268	380234	151125	369643
120	310634	455501	566140	202113	345481	369660	246537	404551	314005	231866	393348	155535	372274
130	11658	12569	22790	924	27356	364714	239541	408988	304651	224025	366739	151088	353067
160	33950	26000	46505	12449	41496	391622	238913	384894	309127	228516	357764	146709	364038
190	41889	35272	52010	18922	51654	372152	254585	392958	326943	228877	376819	156947	347150
220	43692	36944	50589	20885	63895	388614	234694	405069	310725	252311	360523	149010	364162
250	61844	44342	52013	23047	67998	374653	223725	378488	305176	237940	358683	141623	361217
280	58852	48227	57317	22315	66163	370423	243889	400059	301011	238479	379551	164845	345342
310	57639	49903	58658	27937	62957	371038	240614	393638	310834	245001	373810	148444	350780
320	56850	52192	57996	31182	66668	356908	231619	385233	301809	238915	365078	144410	338115
620	75844	95655	90192	24719	93037	395100	233786	385273	319642	225740	403093	156133	340701
920	88474	121360	94207	50093	102234	386694	216466	406702	328012	224250	395505	156104	332425
1220	104658	140586	112444	67043	129087	396481	214784	424342	348770	215460	383544	151489	353293
1520	110664	169178	105503	82910	125308	392645	212586	418264	365129	209023	378203	157331	349127
1820	108671	203524	137938	86252	144311	379132	200032	414347	344677	234732	379946	154253	337694
2120	131932	227969	144463	95465	148409	394228	207305	405165	333716	242754	396794	145948	324120
2420	135198	206428	143990	106128	136342	364832	204169	377471	313173	241839	402362	155810	331671
2720	130612	229180	167798	112511	151384	376007	204615	386296	292931	229662	394974	145137	320564
3020	128440	229925	177883	117123	149583	367873	216333	398468	298335	234598	388803	153768	311252
3320	150754	229451	162652	119395	165505	349897	197082	381858	299384	227241	378357	139754	310429
3620	138111	237627	174981	123461	182647	367724	217357	379409	329383	242205	415542	140225	301227
3920	126890	241201	182760	128061	175532	348243	210709	348638	329015	217715	431061	149860	297941
4220	135583	225518	167310	116413	180440	331564	198501	396541	306680	226982	415124	137032	291837
4520	137701	242989	192794	112775	182816	356842	202834	415339	307506	229151	434375	152724	265510
	AVERAGE OF PREBLEACH
	326146	457776	568526	208210	354408	393890	247070	403182	322982	232524	414756	154883	357131
NORMALIZED DATA
time	b1	b2	b3	b4	b5	c1	c2	c3	c4	c5	c6	c7	c8	Average of controls
120	1	1	1	1	1	1	1	1	1	1	1	1	1	1
130	0.0357448	0.0274567	0.0400861	0.00443782	0.0771878	0.925928	0.969528	1.0144	0.943245	0.963449	0.884227	0.975498	0.988622	0.958112
160	0.104095	0.0567964	0.0817993	0.0597905	0.117085	0.994242	0.966986	0.95464	0.957103	0.982763	0.862588	0.947225	1.01934	0.960611
190	0.128437	0.0770509	0.0914822	0.0908793	0.145747	0.944812	1.03042	0.974641	1.01226	0.984316	0.908531	1.01333	0.972053	0.980045
220	0.133965	0.0807033	0.0889828	0.100307	0.180286	0.986605	0.94991	1.00468	0.962051	1.0851	0.86924	0.962081	1.01969	0.979919
250	0.189621	0.0968641	0.0914875	0.110691	0.191864	0.951161	0.905513	0.938752	0.944871	1.02329	0.864804	0.914387	1.01144	0.944278
280	0.180447	0.105351	0.100817	0.107175	0.186686	0.940422	0.987126	0.992254	0.931975	1.02561	0.915118	1.06432	0.966991	0.977977
310	0.176728	0.109012	0.103176	0.134177	0.17764	0.941983	0.973871	0.976328	0.962389	1.05366	0.901276	0.958427	0.982218	0.968769
320	0.174309	0.114012	0.102011	0.149762	0.188111	0.90611	0.937464	0.955481	0.934446	1.02749	0.880223	0.932381	0.946754	0.940043
620	0.232546	0.208956	0.158642	0.118721	0.262514	1.00307	0.946235	0.95558	0.989659	0.970825	0.971879	1.00807	0.953996	0.974914
920	0.271271	0.265108	0.165704	0.240589	0.288464	0.98173	0.876133	1.00873	1.01557	0.964417	0.953584	1.00788	0.930822	0.967359
1220	0.320893	0.307107	0.197782	0.321997	0.364233	1.00658	0.869325	1.05248	1.07984	0.926614	0.924745	0.978087	0.989254	0.978366
1520	0.339309	0.369565	0.185573	0.398203	0.35357	0.996839	0.860429	1.03741	1.13049	0.898931	0.911868	1.01581	0.977589	0.97867
1820	0.333198	0.444593	0.242624	0.414254	0.407189	0.962532	0.809617	1.02769	1.06717	1.0095	0.91607	0.995932	0.945576	0.966761
2120	0.404519	0.497993	0.254101	0.458503	0.418752	1.00086	0.839054	1.00492	1.03323	1.044	0.956692	0.942311	0.907567	0.966079
2420	0.414533	0.450937	0.253269	0.509716	0.384703	0.926228	0.826362	0.936229	0.96963	1.04006	0.970116	1.00599	0.928711	0.950415
2720	0.400471	0.500638	0.295146	0.540372	0.427146	0.954599	0.828167	0.958118	0.906958	0.987692	0.952304	0.937075	0.89761	0.927815
3020	0.393812	0.502266	0.312885	0.562523	0.422064	0.933948	0.875595	0.988308	0.92369	1.00892	0.937425	0.992801	0.871536	0.941528
3320	0.462229	0.50123	0.286094	0.573435	0.46699	0.888311	0.797677	0.94711	0.926938	0.97728	0.912239	0.90232	0.869231	0.902638
3620	0.423464	0.519091	0.30778	0.592963	0.515358	0.93357	0.879739	0.941036	1.01982	1.04163	1.00189	0.905361	0.843465	0.945815
3920	0.389059	0.526898	0.321463	0.615056	0.495282	0.884112	0.852832	0.864716	1.01868	0.936312	1.03931	0.967569	0.834263	0.924724
4220	0.415713	0.492639	0.294288	0.559113	0.50913	0.841768	0.803421	0.983528	0.949527	0.976166	1.00089	0.884745	0.817172	0.907152
4520	0.422207	0.530804	0.339112	0.54164	0.515835	0.905943	0.820958	1.03015	0.952085	0.985494	1.0473	0.98606	0.743454	0.933931
CORRECTED DATA
Time	b1	b2	b3	b4	b5			Filter out due to large abrupt change or wrong targeting.
120	1	1	1	1	1
130	0.0373075	0.0286571	0.0418387	0.00463184	0.0805624
160	0.108363	0.0591253	0.0851534	0.0622422	0.121886
190	0.131052	0.0786197	0.0933449	0.0927297	0.148715
220	0.13671	0.0823571	0.0908063	0.102363	0.183981
250	0.20081	0.10258	0.0968862	0.117223	0.203185
280	0.184511	0.107723	0.103087	0.109589	0.19089
310	0.182425	0.112526	0.106502	0.138503	0.183367
320	0.185426	0.121284	0.108518	0.159314	0.200109
620	0.23853	0.214333	0.162724	0.121776	0.269268
920	0.280425	0.274053	0.171295	0.248707	0.298197
1220	0.327989	0.313898	0.202155	0.329117	0.372287
1520	0.346704	0.37762	0.189617	0.406882	0.361276
1820	0.344654	0.459879	0.250966	0.428497	0.421189
2120	0.418722	0.515479	0.263023	0.474602	0.433455
2420	0.43616	0.474463	0.266483	0.536308	0.404774
2720	0.431628	0.539588	0.318109	0.582414	0.460378
3020	0.418269	0.533458	0.332316	0.597458	0.448276
3320	0.512087	0.555295	0.316954	0.635288	0.517361
3620	0.447724	0.548829	0.325413	0.626934	0.544882
3920	0.42073	0.569789	0.347631	0.665124	0.5356
4220	0.458262	0.543061	0.324408	0.616339	0.561241
4520	0.452075	0.568354	0.363102	0.579957	0.552326
	Normalize the bouton fluorescent right after bleaching to 0
Recovery Time_(sec)	b1	b2	b3	b4	b5
0	0	0	0	0	0
30	0.073809	0.0313671	0.0452061	0.0578784	0.0449447
60	0.097377	0.0514367	0.0537553	0.0885078	0.074124
90	0.103255	0.0552843	0.0511058	0.0981858	0.11248
120	0.169839	0.0761038	0.0574512	0.113115	0.133367
150	0.152908	0.0813987	0.063923	0.105445	0.119994
180	0.150742	0.0863436	0.0674867	0.134494	0.111812
190	0.153859	0.0953597	0.0695905	0.155402	0.130021
490	0.209021	0.191154	0.126164	0.117689	0.205241
790	0.252539	0.252636	0.135109	0.245211	0.236704
1090	0.301947	0.293656	0.167317	0.325995	0.317285
1390	0.321386	0.359258	0.154232	0.404122	0.30531
1690	0.319257	0.443945	0.218259	0.425838	0.370472
1990	0.396196	0.501184	0.230843	0.472157	0.383813
2290	0.414309	0.458959	0.234453	0.534151	0.352619
2590	0.409602	0.526005	0.288333	0.58047	0.413096
2890	0.395725	0.519694	0.303161	0.595584	0.399933
3190	0.493179	0.542175	0.287128	0.63359	0.475071
3490	0.426322	0.535518	0.295957	0.625198	0.505004
3790	0.398282	0.557097	0.319145	0.663566	0.494908
4090	0.437268	0.52958	0.294908	0.614554	0.522796
4390	0.430841	0.55562	0.335292	0.578003	0.5131

## Sheet: DQL 7jan F1
	IntDen(b1)	IntDen(b2)	IntDen(b3)	IntDen(b4)	IntDen(b5)	IntDen(background)	IntDen(c1)	IntDen(c2)	IntDen(c3)	IntDen(c4)	IntDen(c5)	IntDen(c6)	IntDen(c7)	IntDen(c8)
0	7156002	6500915	4941978	4681054	4920897	147477	3299290	4448228	7640787	4700435	5854376	3027878	4686942	5201885
30	7474032	6313490	4855177	3828834	4635831	134580	3099399	4402719	7388921	3931457	5586081	2884446	4348040	5145451
60	7967853	6405563	4546645	4128261	4617540	156071	2942115	4306312	7101745	4586855	5977835	2750638	4414708	5139562
90	7359419	6003634	4748206	4008455	4284817	138159	3234143	4262813	7167656	4498909	5083993	2749343	4179630	4575065
120	7272242	6214085	4582370	4638982	4727914	148978	3186230	4241354	7763413	4423189	5731554	2796796	4489227	5010960
130	680940	435520	242384	229706	473150	133970	3298074	3933034	7388055	4540714	5448757	2712944	4527538	5035654
160	1058473	624467	507926	334431	727702	157605	3236897	4416800	6830512	4173960	4826171	2562204	4295721	4567638
190	1235999	754586	570237	401598	723421	142040	3073575	4117033	6741250	4116835	5348192	2456159	4290912	4451985
220	1630772	1135303	568938	434448	752212	161392	3080128	4086418	6623503	4073128	5010390	2491971	4530894	4315771
250	1600436	1172844	611047	477000	984680	150273	3362959	4198648	6913601	4122953	5203652	2354919	4466328	4510029
280	1810575	1387098	664420	462372	911204	171012	2164904	4144099	6729686	4067234	5178533	2331947	4322295	4884365
310	1721694	1406057	558125	428073	868911	146144	3093438	3843831	6346325	4186372	4846368	2328626	4097145	4776422
320	1780899	1315260	440401	449448	926561	160719	3137246	3794206	6248124	4174247	4921870	2145208	4031380	4719102
620	2588474	1882610	750091	572413	1213214	140643	3245647	4255934	7381048	4394206	5029608	2994864	3910512	4596354
920	2328638	2430920	864701	726869	1461872	154273	3514737	4448907	7291755	4363077	4952824	2845098	3855445	4293003
1220	3436821	2734110	824260	869723	1341628	150390	3756994	4353559	6302010	4460364	5158826	2579298	4235980	4459912
1520	3070096	3211388	740245	725228	1317744	137293	3446912	4279561	5607086	4021211	4306431	3218351	3539413	4310088
1820	3653388	3104846	764439	1071699	1123218	137761	3060149	3930264	5448414	3079479	3939589	3025447	3740379	4357191
2120	4331111	4177332	639863	867198	1225455	138868	2576573	4163994	6219630	4046118	4175904	2965032	3362215	4538950
2420	4017455	3938090	776013	624881	1731565	135192	2583312	4084172	6242226	3542279	4124568	2159452	4245236	4546823
2720	3952141	4756220	577359	478731	1524451	157190	2476387	3681022	7152138	3904810	3860491	2894987	4671217	4280055
3020	3865652	4087739	584591	624027	1475659	144313	2346313	3579950	6823826	3590924	4152288	2696888	4102036	4340088
3320	3652273	3724611	773875	393024	1517486	133892	2364191	4237069	5776222	2900301	4410063	2727815	3895427	4412670
3620	3265578	5184820	745886	368382	1531923	121512	2802492	3896474	6287373	2898497	3963792	2445693	3748377	3911588
3920	3010571	5080395	527689	325787	1710152	129038	2965111	4542507	5962957	2738878	3888465	2580285	3492795	4316201
4220	3842341	5567814	575629	334540	1750507	126068	3062559	4497638	5497957	3116190	3640857	2856272	3172644	3984498
4520	4393374	5605432	833039	343186	1853641	140401	2897318	4573165	5703553	3299732	3789899	3021887	3353237	3890492
time
0	7008525	6353438	4794501	4533577	4773420	3151813	4300751	7493310	4552958	5706899	2880401	4539465	5054408
30	7339452	6178910	4720597	3694254	4501251	2964819	4268139	7254341	3796877	5451501	2749866	4213460	5010871
60	7811782	6249492	4390574	3972190	4461469	2786044	4150241	6945674	4430784	5821764	2594567	4258637	4983491
90	7221260	5865475	4610047	3870296	4146658	3095984	4124654	7029497	4360750	4945834	2611184	4041471	4436906
120	7123264	6065107	4433392	4490004	4578936	3037252	4092376	7614435	4274211	5582576	2647818	4340249	4861982
130	546970	301550	108414	95736	339180	3164104	3799064	7254085	4406744	5314787	2578974	4393568	4901684
160	900868	466862	350321	176826	570097	3079292	4259195	6672907	4016355	4668566	2404599	4138116	4410033
190	1093959	612546	428197	259558	581381	2931535	3974993	6599210	3974795	5206152	2314119	4148872	4309945
220	1469380	973911	407546	273056	590820	2918736	3925026	6462111	3911736	4848998	2330579	4369502	4154379
250	1450163	1022571	460774	326727	834407	3212686	4048375	6763328	3972680	5053379	2204646	4316055	4359756
280	1639563	1216086	493408	291360	740192	1993892	3973087	6558674	3896222	5007521	2160935	4151283	4713353
310	1575550	1259913	411981	281929	722767	2947294	3697687	6200181	4040228	4700224	2182482	3951001	4630278
320	1620180	1154541	279682	288729	765842	2976527	3633487	6087405	4013528	4761151	1984489	3870661	4558383
620	2447831	1741967	609448	431770	1072571	3105004	4115291	7240405	4253563	4888965	2854221	3769869	4455711
920	2174365	2276647	710428	572596	1307599	3360464	4294634	7137482	4208804	4798551	2690825	3701172	4138730
1220	3286431	2583720	673870	719333	1191238	3606604	4203169	6151620	4309974	5008436	2428908	4085590	4309522
1520	2932803	3074095	602952	587935	1180451	3309619	4142268	5469793	3883918	4169138	3081058	3402120	4172795
1820	3515627	2967085	626678	933938	985457	2922388	3792503	5310653	2941718	3801828	2887686	3602618	4219430
2120	4192243	4038464	500995	728330	1086587	2437705	4025126	6080762	3907250	4037036	2826164	3223347	4400082
2420	3882263	3802898	640821	489689	1596373	2448120	3948980	6107034	3407087	3989376	2024260	4110044	4411631
2720	3794951	4599030	420169	321541	1367261	2319197	3523832	6994948	3747620	3703301	2737797	4514027	4122865
3020	3721339	3943426	440278	479714	1331346	2202000	3435637	6679513	3446611	4007975	2552575	3957723	4195775
3320	3518381	3590719	639983	259132	1383594	2230299	4103177	5642330	2766409	4276171	2593923	3761535	4278778
3620	3144066	5063308	624374	246870	1410411	2680980	3774962	6165861	2776985	3842280	2324181	3626865	3790076
3920	2881533	4951357	398651	196749	1581114	2836073	4413469	5833919	2609840	3759427	2451247	3363757	4187163
4220	3716273	5441746	449561	208472	1624439	2936491	4371570	5371889	2990122	3514789	2730204	3046576	3858430
4520	4252973	5465031	692638	202785	1713240	2756917	4432764	5563152	3159331	3649498	2881486	3212836	3750091
	AVERAGE OF PREBLEACH
	7.30086e+06	6.14248e+06	4.58982e+06	4.11206e+06	4.49235e+06	3.00718e+06	4.18723e+06	7.26745e+06	4283116	5.50171e+06	2.69677e+06	4.27866e+06	4.86953e+06
NORMALIZED DATA
time	b1	b2	b3	b4	b5	c1	c2	c3	c4	c5	c6	c7	c8	Average of controls
120	1	1	1	1	1	1	1	1	1	1	1	1	1	1
130	0.0749186	0.0490925	0.0236205	0.0232817	0.0755017	1.05218	0.907297	0.998161	1.02886	0.966024	0.956321	1.02686	1.0066	0.992789
160	0.123392	0.0760054	0.0763256	0.0430018	0.126904	1.02398	1.01719	0.918191	0.937718	0.848566	0.89166	0.967153	0.905638	0.938761
190	0.14984	0.0997228	0.0932927	0.0631211	0.129416	0.974844	0.949313	0.90805	0.928015	0.946278	0.858109	0.969667	0.885084	0.92742
220	0.201261	0.158553	0.0887934	0.0664036	0.131517	0.970588	0.93738	0.889185	0.913292	0.881361	0.864212	1.02123	0.853137	0.916299
250	0.198629	0.166475	0.10039	0.0794557	0.18574	1.06834	0.966838	0.930633	0.927521	0.91851	0.817514	1.00874	0.895313	0.941676
280	0.224571	0.19798	0.1075	0.0708549	0.164767	0.663043	0.948858	0.902472	0.90967	0.910175	0.801306	0.970231	0.967927	0.88421
310	0.215803	0.205115	0.0897597	0.0685614	0.160889	0.980085	0.883086	0.853144	0.943292	0.85432	0.809296	0.923421	0.950867	0.899689
320	0.221916	0.18796	0.0609353	0.0702151	0.170477	0.989806	0.867754	0.837626	0.937058	0.865394	0.735877	0.904644	0.936103	0.884283
620	0.33528	0.283593	0.132782	0.105001	0.238755	1.03253	0.982819	0.996278	0.9931	0.888626	1.05839	0.881087	0.915018	0.968481
920	0.297823	0.370639	0.154783	0.139248	0.291073	1.11748	1.02565	0.982116	0.98265	0.872192	0.997797	0.865031	0.849924	0.961605
1220	0.450143	0.420631	0.146818	0.174932	0.265171	1.19933	1.00381	0.846462	1.00627	0.910341	0.900674	0.954877	0.884997	0.963345
1520	0.401707	0.500464	0.131367	0.142978	0.262769	1.10057	0.989262	0.752643	0.906797	0.757789	1.1425	0.795137	0.856919	0.912702
1820	0.481536	0.483043	0.136536	0.227121	0.219364	0.971803	0.90573	0.730745	0.686817	0.691026	1.0708	0.841998	0.866496	0.845676
2120	0.574212	0.657464	0.109153	0.17712	0.241875	0.810628	0.961286	0.836712	0.912245	0.733778	1.04798	0.753355	0.903595	0.869947
2420	0.531754	0.619114	0.139618	0.119086	0.355354	0.814091	0.9431	0.840327	0.795469	0.725115	0.750625	0.960592	0.905966	0.841911
2720	0.519795	0.748725	0.0915436	0.0781945	0.304353	0.771219	0.841566	0.962504	0.874975	0.673118	1.01521	1.05501	0.846666	0.880034
3020	0.509713	0.641992	0.0959248	0.11666	0.296359	0.732247	0.820503	0.9191	0.804697	0.728496	0.946531	0.924992	0.861638	0.842276
3320	0.481913	0.584571	0.139435	0.0630175	0.307989	0.741657	0.979926	0.776384	0.645887	0.777243	0.961864	0.879139	0.878684	0.830098
3620	0.430643	0.824309	0.136034	0.0600355	0.313959	0.891526	0.901541	0.848421	0.648356	0.698379	0.86184	0.847664	0.778325	0.809506
3920	0.394684	0.806084	0.0868554	0.0478468	0.351957	0.9431	1.05403	0.802746	0.609332	0.683319	0.908958	0.786171	0.85987	0.830941
4220	0.509019	0.885919	0.0979474	0.0506977	0.361601	0.976492	1.04402	0.739171	0.698118	0.638853	1.0124	0.71204	0.792362	0.826682
4520	0.582531	0.88971	0.150907	0.0493146	0.381369	0.916777	1.05864	0.765489	0.737624	0.663338	1.0685	0.750898	0.770113	0.841422
CORRECTED DATA
Time	b1	b2	b3	b4	b5			Filter out due to large abrupt change or wrong targeting.
120	1	1	1	1	1
130	0.0754628	0.0494491	0.0237921	0.0234509	0.0760502
160	0.131441	0.0809635	0.0813046	0.0458069	0.135182
190	0.161566	0.107527	0.100594	0.068061	0.139544
220	0.219646	0.173037	0.0969045	0.0724694	0.143531
250	0.210932	0.176786	0.106608	0.0843769	0.197244
280	0.25398	0.223905	0.121578	0.0801336	0.186344
310	0.239865	0.227984	0.0997675	0.0762057	0.178827
320	0.250956	0.212556	0.0689092	0.0794035	0.192786
620	0.346192	0.292823	0.137104	0.108418	0.246526
920	0.309715	0.385438	0.160964	0.144808	0.302695
1220	0.467271	0.436636	0.152405	0.181589	0.27526
1520	0.440129	0.548333	0.143932	0.156654	0.287903
1820	0.56941	0.571192	0.161452	0.268568	0.259394
2120	0.660054	0.755752	0.125471	0.203599	0.278034
2420	0.631604	0.735368	0.165834	0.141447	0.42208
2720	0.590654	0.850791	0.104023	0.088854	0.345843
3020	0.605161	0.762211	0.113888	0.138506	0.351855
3320	0.58055	0.704219	0.167974	0.0759157	0.371027
3620	0.531983	1.01829	0.168046	0.0741631	0.38784
3920	0.474985	0.970086	0.104527	0.0575814	0.423565
4220	0.615737	1.07166	0.118482	0.0613266	0.437413
4520	0.692317	1.05739	0.179348	0.0586087	0.453243
	Normalize the bouton fluorescent right after bleaching to 0
Recovery Time_(sec)	b1	b2	b3	b4	b5
0	0	0	0	0	0
30	0.0605477	0.0331538	0.0589142	0.0228929	0.0639994
60	0.0931315	0.0610994	0.0786735	0.0456814	0.06872
90	0.155952	0.130017	0.0748943	0.0501957	0.0730348
120	0.146526	0.133961	0.0848345	0.0623891	0.131169
150	0.193088	0.183532	0.100169	0.0580439	0.119372
180	0.17782	0.187822	0.0778271	0.0540217	0.111236
190	0.189818	0.171592	0.0462167	0.0572962	0.126344
490	0.292826	0.256034	0.116073	0.0870076	0.184507
790	0.253372	0.353468	0.140515	0.124271	0.2453
1090	0.423789	0.407329	0.131747	0.161935	0.215607
1390	0.394431	0.524836	0.123068	0.136401	0.22929
1690	0.534264	0.548884	0.141015	0.251003	0.198435
1990	0.632307	0.743046	0.104157	0.184474	0.218609
2290	0.601535	0.721601	0.145504	0.12083	0.374512
2590	0.557242	0.843029	0.0821861	0.0669737	0.291999
2890	0.572934	0.749841	0.0922914	0.117818	0.298506
3190	0.546314	0.688832	0.147696	0.0537248	0.319257
3490	0.493782	1.01924	0.14777	0.0519301	0.337453
3790	0.432132	0.96853	0.0827022	0.0349502	0.376119
4090	0.584372	1.07538	0.0969981	0.0387853	0.391106
4390	0.667203	1.06037	0.159347	0.0360021	0.408239

## Sheet: DQL 7jan F2
	IntDen(b1)	IntDen(b2)	IntDen(b3)	IntDen(b4)	IntDen(b5)	IntDen(background)	IntDen(c1)	IntDen(c2)	IntDen(c3)	IntDen(c4)	IntDen(c5)	IntDen(c6)	IntDen(c7)	IntDen(c8)
0	6014701	7584455	6824405	6849897	4112582	93118	3331434	4546915	5142399	3695375	3477515	5135828	5140680	3595859
30	5918299	6943679	6671044	6840188	3871759	115846	3430540	4606945	4961422	3425565	3712920	5115637	5082739	3451446
60	6110489	6754572	6785147	6955788	4018663	120282	3130554	4735504	5093125	3702261	3385186	5104539	4889494	3501935
90	6086539	6907499	6426224	6721012	3741447	82959	3200173	4700335	5209289	3470763	3622282	4980445	4897027	3458128
120	5909909	7399827	6269462	6693675	3715382	104368	3094064	4440324	4955897	3648773	3391070	4721300	4779110	3273925
130	239655	477424	415646	452342	433400	106309	3089634	4103291	4817623	3412483	3476987	4646624	4710439	3345075
160	389473	651036	563100	716139	550596	116883	2997455	4070504	4871005	3514031	3442969	4514705	4697517	3402262
190	444014	866135	631127	866763	542782	103009	3322820	4156609	5038559	3423077	3466403	4764069	4955515	3079418
220	537759	1004440	686522	849591	613622	100316	3438812	3833606	5038033	3568568	3434804	4496942	4831892	3010475
250	551692	1064585	660278	883976	678780	103636	3364453	3843344	4895671	3411071	3253988	4759725	4648320	2964650
280	569037	1128961	699181	981135	652942	130379	3328722	3920809	4914676	3466781	3215966	4725385	4760151	3044322
310	613947	1295473	717089	918329	652566	101405	3344002	3991473	4730446	3568855	3376013	4364527	4625278	3120339
320	599462	1211249	682770	902528	661328	106205	3012779	3552672	4724657	3318109	3273482	4155233	4426719	2815238
620	797364	1445178	973367	1222141	858344	90349	3112987	4014932	4580543	3431421	3495864	4697320	4627900	3211001
920	896911	1520378	1179288	1484827	1271300	119463	3097938	4090851	4529775	3466837	3520281	5290021	4395928	3181329
1220	1076109	1853998	1407888	1846950	1359021	102192	3025533	3901816	4628590	3908472	3659008	5193483	4473166	3488602
1520	1173418	1995729	1436519	1788094	1322726	98292	2946952	3638475	5360945	3755350	3604617	4846232	4144540	3461460
1820	1201404	1870397	1459320	905383	1306460	115464	2990487	3595060	5268464	3583171	3912530	4551404	3726607	3433682
2120	1223531	1890420	1746209	1118820	1222166	128695	2672375	3798120	5698507	3564392	3962975	4546427	3828682	3318770
2420	1203025	2199079	1684667	984506	1359102	120860	2246179	3182280	5289167	3657110	3884412	4314911	3821798	3400275
2720	1410044	1819842	2237056	1018615	1498096	116357	2590108	3163124	5625365	3400186	3746475	4615536	3774273	3276174
3020	1572137	1820292	3749089	898745	1484448	120377	2641788	3318856	5513093	3662904	3728740	4983517	4116797	2726443
3320	1768205	2228433	3797709	985093	1616905	109193	2818098	3149928	5350272	3195280	3339289	5102909	3717257	3116166
3620	1853005	2539507	2865869	1230312	1505786	109112	2906923	2876833	4898690	3107993	3836741	4947279	3700754	3359166
3920	1884648	2518998	3971171	1792101	1591360	100644	2546474	3607070	5066640	3083644	3686032	4364107	3659489	3212249
4220	1963797	2630722	4236006	2691864	1800691	103214	2206759	3407067	4779303	3640272	3703795	4529203	3345542	3293573
4520	1987952	2915516	4197228	2538059	1893064	104468	2556824	3464087	5064657	3520638	3795077	4476097	3487438	3260209
time
0	5921583	7491337	6731287	6756779	4019464	3238316	4453797	5049281	3602257	3384397	5042710	5047562	3502741
30	5802453	6827833	6555198	6724342	3755913	3314694	4491099	4845576	3309719	3597074	4999791	4966893	3335600
60	5990207	6634290	6664865	6835506	3898381	3010272	4615222	4972843	3581979	3264904	4984257	4769212	3381653
90	6003580	6824540	6343265	6638053	3658488	3117214	4617376	5126330	3387804	3539323	4897486	4814068	3375169
120	5805541	7295459	6165094	6589307	3611014	2989696	4335956	4851529	3544405	3286702	4616932	4674742	3169557
130	133346	371115	309337	346033	327091	2983325	3996982	4711314	3306174	3370678	4540315	4604130	3238766
160	272590	534153	446217	599256	433713	2880572	3953621	4754122	3397148	3326086	4397822	4580634	3285379
190	341005	763126	528118	763754	439773	3219811	4053600	4935550	3320068	3363394	4661060	4852506	2976409
220	437443	904124	586206	749275	513306	3338496	3733290	4937717	3468252	3334488	4396626	4731576	2910159
250	448056	960949	556642	780340	575144	3260817	3739708	4792035	3307435	3150352	4656089	4544684	2861014
280	438658	998582	568802	850756	522563	3198343	3790430	4784297	3336402	3085587	4595006	4629772	2913943
310	512542	1194068	615684	816924	551161	3242597	3890068	4629041	3467450	3274608	4263122	4523873	3018934
320	493257	1105044	576565	796323	555123	2906574	3446467	4618452	3211904	3167277	4049028	4320514	2709033
620	707015	1354829	883018	1131792	767995	3022638	3924583	4490194	3341072	3405515	4606971	4537551	3120652
920	777448	1400915	1059825	1365364	1151837	2978475	3971388	4410312	3347374	3400818	5170558	4276465	3061866
1220	973917	1751806	1305696	1744758	1256829	2923341	3799624	4526398	3806280	3556816	5091291	4370974	3386410
1520	1075126	1897437	1338227	1689802	1224434	2848660	3540183	5262653	3657058	3506325	4747940	4046248	3363168
1820	1085940	1754933	1343856	789919	1190996	2875023	3479596	5153000	3467707	3797066	4435940	3611143	3318218
2120	1094836	1761725	1617514	990125	1093471	2543680	3669425	5569812	3435697	3834280	4417732	3699987	3190075
2420	1082165	2078219	1563807	863646	1238242	2125319	3061420	5168307	3536250	3763552	4194051	3700938	3279415
2720	1293687	1703485	2120699	902258	1381739	2473751	3046767	5509008	3283829	3630118	4499179	3657916	3159817
3020	1451760	1699915	3628712	778368	1364071	2521411	3198479	5392716	3542527	3608363	4863140	3996420	2606066
3320	1659012	2119240	3688516	875900	1507712	2708905	3040735	5241079	3086087	3230096	4993716	3608064	3006973
3620	1743893	2430395	2756757	1121200	1396674	2797811	2767721	4789578	2998881	3727629	4838167	3591642	3250054
3920	1784004	2418354	3870527	1691457	1490716	2445830	3506426	4965996	2983000	3585388	4263463	3558845	3111605
4220	1860583	2527508	4132792	2588650	1697477	2103545	3303853	4676089	3537058	3600581	4425989	3242328	3190359
4520	1883484	2811048	4092760	2433591	1788596	2452356	3359619	4960189	3416170	3690609	4371629	3382970	3155741
	AVERAGE OF PREBLEACH
	5.90467e+06	7.01469e+06	6.49194e+06	6.7088e+06	3788652	3.13404e+06	4502690	4.96911e+06	3.48523e+06	3414480	4.90824e+06	4.8545e+06	3352944
NORMALIZED DATA
time	b1	b2	b3	b4	b5	c1	c2	c3	c4	c5	c6	c7	c8	Average of controls
120	1	1	1	1	1	1	1	1	1	1	1	1	1	1
130	0.0225831	0.0529054	0.0476494	0.051579	0.0863344	0.951911	0.887688	0.94812	0.948624	0.987172	0.92504	0.948426	0.965947	0.945366
160	0.0461651	0.0761478	0.068734	0.0893239	0.114477	0.919125	0.878058	0.956735	0.974726	0.974112	0.896009	0.943586	0.979849	0.940275
190	0.0577517	0.10879	0.0813498	0.113844	0.116076	1.02737	0.900262	0.993246	0.95261	0.985038	0.949641	0.99959	0.8877	0.961932
220	0.0740842	0.12889	0.0902975	0.111685	0.135485	1.06524	0.829124	0.993682	0.995128	0.976573	0.895765	0.974679	0.867941	0.949766
250	0.0758816	0.136991	0.0857435	0.116316	0.151807	1.04045	0.83055	0.964364	0.948985	0.922645	0.948628	0.936181	0.853284	0.930636
280	0.07429	0.142356	0.0876166	0.126812	0.137928	1.02052	0.841815	0.962807	0.957297	0.903677	0.936183	0.953708	0.86907	0.930634
310	0.0868028	0.170224	0.0948382	0.121769	0.145477	1.03464	0.863943	0.931563	0.994898	0.959036	0.868565	0.931894	0.900383	0.935615
320	0.0835367	0.157533	0.0888124	0.118698	0.146523	0.927421	0.765424	0.929432	0.921575	0.927602	0.824946	0.890003	0.807957	0.874295
620	0.119738	0.193142	0.136018	0.168703	0.202709	0.964455	0.871609	0.903621	0.958637	0.997374	0.938621	0.934711	0.93072	0.937468
920	0.131667	0.199712	0.163252	0.203518	0.304023	0.950363	0.882003	0.887545	0.960445	0.995999	1.05345	0.880929	0.913187	0.94049
1220	0.16494	0.249734	0.201126	0.26007	0.331735	0.932771	0.843856	0.910907	1.09212	1.04169	1.0373	0.900397	1.00998	0.971126
1520	0.182081	0.270495	0.206137	0.251879	0.323185	0.908942	0.786237	1.05907	1.0493	1.0269	0.967342	0.833505	1.00305	0.954294
1820	0.183912	0.25018	0.207004	0.117744	0.314359	0.917354	0.772782	1.03701	0.994971	1.11205	0.903775	0.743876	0.989643	0.933932
2120	0.185419	0.251148	0.249157	0.147586	0.288617	0.81163	0.814941	1.12089	0.985787	1.12295	0.900065	0.762177	0.951425	0.933732
2420	0.183273	0.296267	0.240884	0.128733	0.326829	0.678141	0.679909	1.04009	1.01464	1.10223	0.854493	0.762373	0.97807	0.888743
2720	0.219095	0.242845	0.326666	0.134489	0.364705	0.789317	0.676655	1.10865	0.942212	1.06315	0.916659	0.753511	0.942401	0.89907
3020	0.245866	0.242336	0.558956	0.116022	0.360041	0.804525	0.710348	1.08525	1.01644	1.05678	0.990812	0.823241	0.777247	0.90808
3320	0.280966	0.302114	0.568168	0.13056	0.397955	0.86435	0.675315	1.05473	0.885475	0.945999	1.01742	0.743242	0.896816	0.885418
3620	0.295341	0.346472	0.424643	0.167124	0.368647	0.892718	0.614682	0.96387	0.860454	1.09171	0.985724	0.739859	0.969314	0.889791
3920	0.302134	0.344756	0.596205	0.252125	0.393469	0.780408	0.77874	0.999373	0.855897	1.05005	0.868635	0.733103	0.928022	0.874279
4220	0.315103	0.360316	0.636603	0.385859	0.448042	0.671193	0.733751	0.941031	1.01487	1.0545	0.901748	0.667902	0.95151	0.867064
4520	0.318982	0.400737	0.630437	0.362746	0.472093	0.782491	0.746136	0.998204	0.980184	1.08087	0.890672	0.696874	0.941185	0.889577
CORRECTED DATA
Time	b1	b2	b3	b4	b5			Filter out due to large abrupt change or wrong targeting.
120	1	1	1	1	1
130	0.0238882	0.0559629	0.0504031	0.0545598	0.0913238
160	0.0490975	0.0809846	0.0730999	0.0949977	0.121748
190	0.0600372	0.113095	0.0845692	0.118349	0.12067
220	0.0780026	0.135707	0.0950734	0.117593	0.142651
250	0.0815373	0.147201	0.0921343	0.124985	0.163122
280	0.0798272	0.152966	0.0941472	0.136264	0.148209
310	0.0927762	0.181938	0.101365	0.130149	0.155488
320	0.0955475	0.180183	0.101582	0.135765	0.167589
620	0.127725	0.206025	0.14509	0.179956	0.216231
920	0.139998	0.212348	0.173582	0.216396	0.32326
1220	0.169844	0.257159	0.207106	0.267803	0.341598
1520	0.190801	0.28345	0.21601	0.263942	0.338664
1820	0.196922	0.267878	0.221648	0.126073	0.336597
2120	0.198578	0.268972	0.26684	0.15806	0.309101
2420	0.206216	0.333355	0.271039	0.144849	0.367743
2720	0.243691	0.270107	0.363338	0.149587	0.405647
3020	0.270754	0.266867	0.615536	0.127766	0.396486
3320	0.317326	0.341211	0.641695	0.147456	0.449454
3620	0.331922	0.389386	0.477239	0.187824	0.414307
3920	0.345581	0.394331	0.681939	0.288381	0.450049
4220	0.363415	0.415559	0.734206	0.445018	0.516735
4520	0.358577	0.450481	0.708693	0.407774	0.530694
	Normalize the bouton fluorescent right after bleaching to 0
Recovery Time_(sec)	b1	b2	b3	b4	b5
0	0	0	0	0	0
30	0.0258262	0.026505	0.0239015	0.0427714	0.0334822
60	0.0370336	0.0605189	0.0359795	0.0674703	0.0322957
90	0.0554386	0.0844715	0.0470413	0.0666702	0.0564857
120	0.0590599	0.0966472	0.0439462	0.0744897	0.0790138
150	0.057308	0.102754	0.046066	0.0864192	0.0626024
180	0.0705738	0.133443	0.0536664	0.079951	0.0706127
190	0.073413	0.131584	0.0538951	0.085891	0.0839305
490	0.106378	0.158958	0.099713	0.132632	0.13746
790	0.118951	0.165656	0.129717	0.171176	0.255246
1090	0.149528	0.213123	0.16502	0.225549	0.275428
1390	0.170998	0.240973	0.174397	0.221466	0.272198
1690	0.177269	0.224477	0.180334	0.0756403	0.269924
1990	0.178965	0.225636	0.227925	0.109473	0.239664
2290	0.186789	0.293836	0.232347	0.0954994	0.3042
2590	0.225182	0.226839	0.329545	0.100511	0.345913
2890	0.252907	0.223406	0.595129	0.077431	0.335832
3190	0.300619	0.302158	0.622677	0.0982567	0.394123
3490	0.315572	0.353188	0.449491	0.140954	0.355443
3790	0.329566	0.358427	0.665057	0.247314	0.394778
4090	0.347836	0.380913	0.720098	0.412991	0.468166
4390	0.34288	0.417905	0.693231	0.373597	0.483528

## Sheet: DQL 9jan F1
	IntDen(b1)	IntDen(b2)	IntDen(b3)	IntDen(b4)	IntDen(b5)	IntDen(background)	IntDen(c1)	IntDen(c2)	IntDen(c3)	IntDen(c4)	IntDen(c5)	IntDen(c6)	IntDen(c7)	IntDen(c8)
0	326177	322314	231314	339291	314599	3132	386385	337253	255949	237902	163588	185599	241403	356524
30	323109	310301	208550	326256	310020	3557	394736	312548	248920	236406	161112	176908	218461	329374
60	334425	316688	206039	345086	359199	3399	400500	306462	246008	222278	162957	177062	213271	340746
90	312441	306000	220078	344428	329707	3443	385076	304877	251270	233269	166668	164409	218003	328533
120	333313	294719	217855	333053	350998	3344	368974	305400	242452	214834	164480	170472	205480	331068
130	22178	18710	15225	13868	26130	3698	373442	300043	225490	211187	130960	160801	210892	305306
160	36771	29862	22751	24271	41695	3369	371462	304795	240582	209765	124152	179879	204641	320213
190	47334	30008	26507	35253	45080	4672	375251	295504	232687	226187	128458	169456	220173	294456
220	45786	34802	29029	35030	45840	3868	365921	309286	230637	214453	124620	168381	211404	337258
250	49766	42870	27905	36757	50894	6327	363327	319928	242322	216609	117156	168634	195609	327762
280	50412	40972	28539	41572	54224	3849	362839	302321	225005	209353	110722	153331	212742	307689
310	48505	41957	34777	51207	57403	3580	371877	308065	241421	217858	111711	158598	227340	315411
320	51731	43039	36175	48405	58229	3559	381699	313629	229278	212543	105466	155538	218444	309769
620	69418	57592	33935	52745	65004	2925	399414	305941	223360	228450	139944	158640	250318	339569
920	97289	84264	41599	39981	73181	3377	379366	301936	223706	203676	170576	150072	238639	362316
1220	109292	87877	37998	58148	100503	3045	390643	295774	220322	188291	141868	165642	253522	356421
1520	124921	107220	44341	56982	95337	3495	354706	295817	180181	210265	160667	175378	253109	348492
1820	131529	110240	39634	48304	105672	3706	327712	298038	172190	203272	161885	181872	256699	379554
2120	132704	111121	39984	49781	122664	3766	316814	296276	176950	185624	157989	173356	225727	397542
2420	126399	114809	52178	30523	139776	3681	336792	293228	185534	219633	157808	161595	230043	394846
2720	138193	133137	42767	23350	103876	7430	332606	282257	182453	182416	122675	167048	222811	322498
3020	144030	142477	49609	11018	126978	4253	349092	306929	205214	195074	126324	154003	217042	360778
3320	160623	147289	38792	15237	138178	5028	348714	309346	204441	195548	128007	165256	210964	331239
3620	171719	127854	47937	15981	140639	11667	327046	302267	175038	206012	125532	161053	204685	378579
3920	166006	130294	45340	11737	172642	4273	335704	278091	186220	203359	144637	170122	201905	333879
4220	171507	122526	40983	13678	160387	3703	302537	271336	195378	204053	147342	175066	203288	333539
4520	183169	134876	41456	17896	191588	3180	347919	296957	186602	207435	150971	171933	192811	340397
time
0	323045	319182	228182	336159	311467	383253	334121	252817	234770	160456	182467	238271	353392
30	319552	306744	204993	322699	306463	391179	308991	245363	232849	157555	173351	214904	325817
60	331026	313289	202640	341687	355800	397101	303063	242609	218879	159558	173663	209872	337347
90	308998	302557	216635	340985	326264	381633	301434	247827	229826	163225	160966	214560	325090
120	329969	291375	214511	329709	347654	365630	302056	239108	211490	161136	167128	202136	327724
130	18480	15012	11527	10170	22432	369744	296345	221792	207489	127262	157103	207194	301608
160	33402	26493	19382	20902	38326	368093	301426	237213	206396	120783	176510	201272	316844
190	42662	25336	21835	30581	40408	370579	290832	228015	221515	123786	164784	215501	289784
220	41918	30934	25161	31162	41972	362053	305418	226769	210585	120752	164513	207536	333390
250	43439	36543	21578	30430	44567	357000	313601	235995	210282	110829	162307	189282	321435
280	46563	37123	24690	37723	50375	358990	298472	221156	205504	106873	149482	208893	303840
310	44925	38377	31197	47627	53823	368297	304485	237841	214278	108131	155018	223760	311831
320	48172	39480	32616	44846	54670	378140	310070	225719	208984	101907	151979	214885	306210
620	66493	54667	31010	49820	62079	396489	303016	220435	225525	137019	155715	247393	336644
920	93912	80887	38222	36604	69804	375989	298559	220329	200299	167199	146695	235262	358939
1220	106247	84832	34953	55103	97458	387598	292729	217277	185246	138823	162597	250477	353376
1520	121426	103725	40846	53487	91842	351211	292322	176686	206770	157172	171883	249614	344997
1820	127823	106534	35928	44598	101966	324006	294332	168484	199566	158179	178166	252993	375848
2120	128938	107355	36218	46015	118898	313048	292510	173184	181858	154223	169590	221961	393776
2420	122718	111128	48497	26842	136095	333111	289547	181853	215952	154127	157914	226362	391165
2720	130763	125707	35337	15920	96446	325176	274827	175023	174986	115245	159618	215381	315068
3020	139777	138224	45356	6765	122725	344839	302676	200961	190821	122071	149750	212789	356525
3320	155595	142261	33764	10209	133150	343686	304318	199413	190520	122979	160228	205936	326211
3620	160052	116187	36270	4314	128972	315379	290600	163371	194345	113865	149386	193018	366912
3920	161733	126021	41067	7464	168369	331431	273818	181947	199086	140364	165849	197632	329606
4220	167804	118823	37280	9975	156684	298834	267633	191675	200350	143639	171363	199585	329836
4520	179989	131696	38276	14716	188408	344739	293777	183422	204255	147791	168753	189631	337217
	AVERAGE OF PREBLEACH
	322518	306629	213392	334248	329530	383759	309933	245545	225563	160386	171515	215949	333874
NORMALIZED DATA
time	b1	b2	b3	b4	b5	c1	c2	c3	c4	c5	c6	c7	c8	Average of controls
120	1	1	1	1	1	1	1	1	1	1	1	1	1	1
130	0.0572991	0.0489581	0.0540179	0.0304265	0.0680728	0.963479	0.956158	0.903265	0.919872	0.793473	0.915972	0.95946	0.903359	0.91438
160	0.103566	0.0864007	0.0908281	0.0625344	0.116305	0.959177	0.972552	0.966068	0.915027	0.753077	1.02912	0.932037	0.948993	0.934507
190	0.132278	0.0826274	0.102323	0.091492	0.122623	0.965655	0.938371	0.928609	0.982055	0.771801	0.960756	0.997927	0.867944	0.92664
220	0.129971	0.100884	0.11791	0.0932302	0.127369	0.943438	0.985432	0.923534	0.933598	0.752884	0.959176	0.961044	0.99855	0.932207
250	0.134687	0.119176	0.101119	0.0910402	0.135244	0.930271	1.01183	0.961108	0.932255	0.691014	0.946314	0.876514	0.962743	0.914007
280	0.144373	0.121068	0.115702	0.112859	0.152869	0.935456	0.963021	0.900675	0.911072	0.666349	0.871539	0.967327	0.910044	0.890685
310	0.139295	0.125158	0.146196	0.14249	0.163333	0.959709	0.982422	0.968626	0.94997	0.674192	0.903816	1.03617	0.933978	0.926111
320	0.149362	0.128755	0.152845	0.13417	0.165903	0.985357	1.00044	0.919258	0.9265	0.635386	0.886097	0.995075	0.917142	0.908157
620	0.206168	0.178284	0.145319	0.149051	0.188387	1.03317	0.977682	0.897738	0.999832	0.854308	0.90788	1.14561	1.0083	0.978065
920	0.291184	0.263794	0.179116	0.109512	0.211829	0.979752	0.963302	0.897307	0.887997	1.04248	0.85529	1.08944	1.07507	0.973829
1220	0.32943	0.27666	0.163797	0.164857	0.295749	1.01	0.944491	0.884877	0.821261	0.865556	0.948005	1.15989	1.05841	0.961562
1520	0.376494	0.338275	0.191413	0.160022	0.278706	0.915186	0.943178	0.719567	0.916685	0.979961	1.00215	1.1559	1.03331	0.958242
1820	0.396328	0.347436	0.168366	0.133428	0.309429	0.844295	0.949663	0.686164	0.884747	0.986239	1.03878	1.17154	1.12572	0.960893
2120	0.399785	0.350113	0.169725	0.137667	0.360811	0.815741	0.943785	0.705305	0.806241	0.961574	0.988776	1.02784	1.17941	0.928585
2420	0.3805	0.362418	0.227267	0.0803057	0.412998	0.868021	0.934224	0.74061	0.957392	0.960975	0.920701	1.04822	1.17159	0.950218
2720	0.405444	0.409964	0.165596	0.0476293	0.292678	0.847344	0.88673	0.712795	0.775775	0.718548	0.930636	0.997372	0.943673	0.851609
3020	0.433393	0.450785	0.212548	0.0202395	0.372425	0.898582	0.976585	0.818429	0.845977	0.761108	0.873101	0.985369	1.06784	0.903374
3320	0.482438	0.463951	0.158225	0.0305432	0.404061	0.895577	0.981883	0.812125	0.844643	0.766769	0.934192	0.953634	0.977048	0.895734
3620	0.496258	0.378917	0.169969	0.0129066	0.391382	0.821815	0.937622	0.665341	0.8616	0.709944	0.870979	0.893815	1.09895	0.857509
3920	0.50147	0.410988	0.192448	0.0223307	0.510937	0.863643	0.883475	0.740993	0.882619	0.875164	0.966965	0.915181	0.987217	0.889407
4220	0.520293	0.387513	0.174702	0.0298431	0.475478	0.778702	0.863519	0.780611	0.888223	0.895583	0.999114	0.924225	0.987906	0.889735
4520	0.558074	0.429496	0.179369	0.0440272	0.571748	0.898321	0.947873	0.747	0.905535	0.921471	0.983896	0.87813	1.01001	0.91153
CORRECTED DATA
Time	b1	b2	b3	b4	b5
120	1	1	1	1	1
130	0.0626645	0.0535424	0.059076	0.0332756	0.074447
160	0.110825	0.092456	0.0971936	0.0669171	0.124456
190	0.14275	0.0891689	0.110424	0.0987353	0.132331
220	0.139423	0.108221	0.126484	0.10001	0.136632
250	0.147359	0.130389	0.110633	0.0996057	0.147969
280	0.162092	0.135927	0.129903	0.126711	0.171631
310	0.150408	0.135143	0.15786	0.153859	0.176364
320	0.164467	0.141776	0.168303	0.147739	0.182681
620	0.210792	0.182282	0.148578	0.152394	0.192612
920	0.299009	0.270883	0.18393	0.112455	0.217522
1220	0.342598	0.287719	0.170345	0.171447	0.307571
1520	0.392901	0.353016	0.199754	0.166995	0.290852
1820	0.412458	0.361576	0.175218	0.138858	0.322022
2120	0.430532	0.37704	0.182778	0.148255	0.38856
2420	0.400434	0.381405	0.239174	0.084513	0.434635
2720	0.476092	0.481399	0.194451	0.0559286	0.343676
3020	0.479749	0.499002	0.235282	0.0224043	0.41226
3320	0.538595	0.517956	0.176643	0.0340985	0.451095
3620	0.57872	0.441881	0.198212	0.0150513	0.456418
3920	0.563825	0.462092	0.216378	0.0251074	0.57447
4220	0.584773	0.435538	0.196353	0.0335416	0.534404
4520	0.612239	0.471181	0.196778	0.0483004	0.62724
	Normalize the bouton fluorescent right after bleaching to 0
Recovery Time_(sec)	b1	b2	b3	b4	b5			Filter out due to large abrupt change or wrong targeting.
0	0	0	0	0	0
30	0.0513798	0.0411149	0.0405108	0.0347995	0.0540318
60	0.0854397	0.0376419	0.054572	0.0677129	0.0625401
90	0.0818901	0.0577714	0.0716406	0.0690317	0.067187
120	0.0903566	0.0811939	0.0547936	0.0686132	0.0794354
150	0.106075	0.087045	0.0752736	0.0966512	0.105001
180	0.0936096	0.086217	0.104986	0.124734	0.110115
190	0.108609	0.093225	0.116084	0.118403	0.11694
490	0.15803	0.136022	0.0951218	0.123218	0.127669
790	0.252145	0.229636	0.132693	0.0819044	0.154583
1090	0.298649	0.247424	0.118255	0.142927	0.251876
1390	0.352314	0.316415	0.149511	0.138323	0.233812
1690	0.373179	0.325459	0.123434	0.109217	0.267489
1990	0.392461	0.341798	0.131469	0.118937	0.339379
2290	0.360351	0.346411	0.191405	0.053001	0.38916
2590	0.441066	0.452061	0.143875	0.0234328	0.290885
2890	0.444968	0.470659	0.187269	-0.0112455	0.364985
3190	0.507749	0.490686	0.124949	0.000851264	0.406943
3490	0.550556	0.410307	0.147872	-0.0188516	0.412695
3790	0.534665	0.431662	0.167179	-0.0084493	0.540242
4090	0.557014	0.403606	0.145896	0.000275152	0.496953
4390	0.586316	0.441265	0.146348	0.0155419	0.597257

[truncated: 1 more sheets: DQL 9jan F2]
