# Supplementary material for: A proline-rich motif on VGLUT1 reduces synaptic vesicle super-pool and spontaneous release frequency
Source: eLife journal article supplement (doi:10.7554/elife.50401), 2019-10-30
Supplement: supp [file elife-50401-supp-v1.zip › elife_poa_e50401_Figure_4_source_data_4.xlsx]

## Sheet: WT-0521-C1
		Raw Data
	Time_(sec)	Roi1	Roi2	Roi3	Roi4	Roi5	Ref_fluo	Background
1	0	1633894	1370569	1596371	1168648	2033816	812155353	30500652
2	30	1.67199e+06	1.37504e+06	1.54392e+06	1.15029e+06	2.03814e+06	8.11189e+08	3.04007e+07
3	60	1.54234e+06	1.39204e+06	1.49248e+06	1.16949e+06	2.05255e+06	8.09674e+08	3.05032e+07
4	90	1.53699e+06	1.38864e+06	1.46624e+06	1.16186e+06	1.9993e+06	8.05494e+08	3.04118e+07
5	120	1.58865e+06	1.31737e+06	1.50805e+06	1.15115e+06	2.02644e+06	8.07937e+08	3.04925e+07
6	150	1.5551e+06	1.31834e+06	1.45201e+06	1.14637e+06	2.03158e+06	8.052e+08	3.05065e+07
7	180	1.57915e+06	1.30993e+06	1.45324e+06	1.18262e+06	2.02864e+06	8.05651e+08	3.05325e+07
8	210	954436	940556	816402	754954	1.04176e+06	8.00584e+08	3.04737e+07
9	240	1.0927e+06	928527	895336	790470	1.11359e+06	8.0143e+08	3.0543e+07
10	270	1.05236e+06	968602	915536	783067	1.13175e+06	7.97762e+08	3.04552e+07
11	300	1.05349e+06	953154	887900	798620	1.1669e+06	7.96456e+08	3.04268e+07
12	330	1.04616e+06	969562	875474	808203	1.12494e+06	7.79681e+08	3.02281e+07
13	360	1.07215e+06	986669	923989	836865	1.1377e+06	7.96093e+08	3.04337e+07
14	390	1.05854e+06	946746	897529	832266	1.17262e+06	7.89265e+08	3.04242e+07
15	690	1.09581e+06	976912	976644	864119	1.12617e+06	7.70157e+08	3.01293e+07
16	990	1.19031e+06	1.07067e+06	981048	980893	1.22922e+06	7.75048e+08	3.0208e+07
17	1290	1.21794e+06	1.0762e+06	1.07896e+06	901508	1.24318e+06	7.76633e+08	3.01646e+07
18	1590	1.36253e+06	1.19764e+06	1.14534e+06	968322	1.25179e+06	7.82368e+08	3.02133e+07
19	1890	1.29461e+06	1.10526e+06	1.12689e+06	938355	1.26013e+06	7.76111e+08	3.01671e+07
20	2190	1.34908e+06	1.14379e+06	1.20974e+06	981295	1.24811e+06	7.79593e+08	3.02218e+07
21	2490	1.23471e+06	1.12198e+06	1.19767e+06	948167	1.31039e+06	7.74241e+08	3.00702e+07
22	2790	1.26779e+06	1.09543e+06	1.05969e+06	1.04281e+06	1.34755e+06	7.68077e+08	3.01315e+07
23	3090	1.25754e+06	1.1128e+06	1.18581e+06	1.094e+06	1.36708e+06	7.72655e+08	3.01846e+07
24	3390	1.26045e+06	1.13012e+06	1.1644e+06	1.11407e+06	1.36315e+06	774669928	3.01321e+07
25	3690	1.23785e+06	1.1061e+06	1.2425e+06	1.00963e+06	1.37495e+06	7.73931e+08	3.01101e+07
26	3990	1.28881e+06	1.13372e+06	1.16558e+06	1.08159e+06	1.39629e+06	7.76764e+08	3.02273e+07
27	4290	1.24518e+06	1.12847e+06	1.19399e+06	1.07895e+06	1.3955e+06	7.78063e+08	3.02083e+07
28	4590	1.16095e+06	985979	1.1514e+06	1.32608e+06	1.39995e+06	7.7188e+08	3.01197e+07
		Background corrected Data
	Time_(sec)	Roi1-bkgd-corr	Roi2-bkgd-corr	Roi3-bkgd-corr	Roi4-bkgd-corr	Roi5-bkgd-corr	Ref_fluo-bkgd-corr
1	0	995304	731979	957781	530058	1.39523e+06	2.78941e+08
2	30	1.0355e+06	738543	907419	513798	1.40164e+06	2.79722e+08
3	60	903695	753391	853835	530841	1.41391e+06	2.76414e+08
4	90	900260	751914	829516	525131	1.36257e+06	2.73833e+08
5	120	950225	678954	869631	512730	1.38802e+06	2.74864e+08
6	150	916389	679629	813300	507657	1.39287e+06	2.71883e+08
7	180	939897	670676	813979	543364	1.38939e+06	2.7188e+08
8	210	316410	302530	178376	116928	403735	2.67841e+08
9	240	453221	289050	255859	150993	474117	2.67475e+08
10	270	414716	330963	277897	145428	494115	2.65341e+08
11	300	416444	316109	250855	161576	529851	2.64532e+08
12	330	413280	336680	242592	175320	492053	2.51232e+08
13	360	434963	349481	286801	199677	500509	2.64049e+08
14	390	421552	309756	260539	195275	535633	2.57386e+08
15	690	464999	346098	345830	233304	495355	2.43435e+08
16	990	557848	438203	348585	348430	596760	2.46949e+08
17	1290	586388	444648	447405	269954	611629	2.49293e+08
18	1590	729956	565064	512768	335749	619221	2.54177e+08
19	1890	663003	473650	495280	306748	628524	2.48727e+08
20	2190	716328	511038	576990	348544	615363	2.51254e+08
21	2490	605129	492403	568093	318590	680816	2.48552e+08
22	2790	636928	464565	428831	411952	716690	2.41316e+08
23	3090	625568	480828	553840	462025	735110	2.44966e+08
24	3390	629580	499246	533530	483196	732277	2.47898e+08
25	3690	607434	475690	612086	379215	744537	2.47545e+08
26	3990	655943	500852	532709	448724	763417	2.48327e+08
27	4290	612708	496004	561518	446479	763031	2.49959e+08
28	4590	530333	355365	520784	695464	769335	2.45326e+08
		Bleaching Corrected Data
	Time_(sec)	Roi1-bkgd_bleach-corr	Roi2-bkgd_bleach-corr	Roi3-bkgd_bleach-corr	Roi4-bkgd_bleach-corr	Roi5-bkgd_bleach-corr
1	0	0.00356816	0.00262414	0.00343364	0.00190025	0.00500187
2	30	0.00370188	0.00264028	0.00324401	0.00183682	0.00501084
3	60	0.00326935	0.00272559	0.00308897	0.00192045	0.00511518
4	90	0.00328763	0.00274589	0.00302928	0.00191771	0.00497593
5	120	0.00345707	0.00247015	0.00316386	0.00186539	0.00504984
6	150	0.00337052	0.00249971	0.00299136	0.00186719	0.00512304
7	180	0.00345702	0.0024668	0.00299389	0.00199854	0.00511029
8	210	0.00118134	0.00112951	0.000665978	0.000436557	0.00150737
9	240	0.00169444	0.00108066	0.000956573	0.000564512	0.00177257
10	270	0.00156295	0.00124731	0.00104732	0.00054808	0.00186219
11	300	0.00157427	0.00119498	0.000948298	0.000610797	0.00200297
12	330	0.00164501	0.00134011	0.000965607	0.000697842	0.00195856
13	360	0.00164728	0.00132355	0.00108617	0.000756211	0.00189552
14	390	0.00163782	0.00120347	0.00101225	0.000758687	0.00208105
15	690	0.00191016	0.00142172	0.00142062	0.000958383	0.00203486
16	990	0.00225896	0.00177447	0.00141157	0.00141094	0.00241654
17	1290	0.0023522	0.00178363	0.00179469	0.00108288	0.00245345
18	1590	0.00287184	0.00222311	0.00201737	0.00132092	0.00243618
19	1890	0.00266559	0.0019043	0.00199126	0.00123327	0.00252696
20	2190	0.00285101	0.00203395	0.00229644	0.00138722	0.00244917
21	2490	0.00243462	0.00198108	0.00228561	0.00128178	0.00273913
22	2790	0.0026394	0.00192513	0.00177705	0.0017071	0.00296992
23	3090	0.0025537	0.00196284	0.00226089	0.00188608	0.00300087
24	3390	0.00253968	0.00201392	0.00215222	0.00194918	0.00295395
25	3690	0.00245383	0.00192163	0.00247263	0.0015319	0.00300769
26	3990	0.00264145	0.0020169	0.00214519	0.00180699	0.00307424
27	4290	0.00245124	0.00198434	0.00224644	0.00178621	0.00305263
28	4590	0.00216175	0.00144855	0.00212283	0.00283486	0.00313598
		Normalized Data
	Time_(sec)	Roi1_corr_norm	Roi2_corr_norm	Roi3_corr_norm	Roi4_corr_norm	Roi5_corr_norm
1	0	1	1	1	1	1
2	30	1.03748	1.00615	0.944773	0.966618	1.00179
3	60	0.916257	1.03866	0.89962	1.01063	1.02265
4	90	0.921379	1.0464	0.882236	1.00918	0.994814
5	120	0.968868	0.941317	0.921431	0.981656	1.00959
6	150	0.944612	0.952583	0.871193	0.982599	1.02422
7	180	0.968855	0.940044	0.871929	1.05172	1.02167
8	210	0.331078	0.430433	0.193957	0.229736	0.301361
9	240	0.474879	0.411816	0.278589	0.297072	0.35438
10	270	0.438028	0.475322	0.305017	0.288424	0.372298
11	300	0.441199	0.455378	0.276179	0.321429	0.400445
12	330	0.461025	0.510687	0.28122	0.367236	0.391565
13	360	0.461661	0.504374	0.316331	0.397952	0.378961
14	390	0.45901	0.458615	0.294804	0.399256	0.416054
15	690	0.535335	0.541788	0.413738	0.504345	0.406819
16	990	0.63309	0.676211	0.4111	0.742501	0.483126
17	1290	0.65922	0.679702	0.52268	0.569859	0.490506
18	1590	0.804853	0.847177	0.58753	0.695131	0.487054
19	1890	0.747049	0.725686	0.579928	0.649004	0.505204
20	2190	0.799015	0.775093	0.668807	0.730017	0.48965
21	2490	0.682317	0.754946	0.665652	0.674533	0.54762
22	2790	0.739708	0.733624	0.517543	0.898357	0.593762
23	3090	0.715691	0.747993	0.658453	0.992541	0.599949
24	3390	0.711761	0.767459	0.626805	1.02575	0.590569
25	3690	0.687704	0.732291	0.720119	0.806158	0.601312
26	3990	0.740283	0.768596	0.624757	0.950918	0.614617
27	4290	0.686976	0.756188	0.654246	0.939986	0.610297
28	4590	0.605845	0.552008	0.618244	1.49183	0.62696
		Normalize the bouton fluorescent right after bleaching to 0
	Recovery Time_(sec)
1	0	0	0	0	0	0
2	30	0.226719	-0.0333112	0.117696	0.0873799	0.0747464
3	60	0.168619	0.0803205	0.154449	0.0761581	0.100007
4	90	0.173618	0.0446347	0.114345	0.118988	0.139689
5	120	0.204876	0.143599	0.121355	0.17843	0.127169
6	150	0.205879	0.132304	0.170184	0.21829	0.109401
7	180	0.2017	0.050426	0.140247	0.219981	0.161695
8	480	0.322034	0.199248	0.305646	0.356353	0.148675
9	780	0.476155	0.439774	0.301978	0.665402	0.256253
10	1080	0.517353	0.446021	0.45715	0.44137	0.266658
11	1380	0.746959	0.745686	0.547337	0.603932	0.26179
12	1680	0.655825	0.528299	0.536765	0.544074	0.287379
13	1980	0.737755	0.616704	0.660368	0.649202	0.265451
14	2280	0.553768	0.580656	0.655981	0.577202	0.347177
15	2580	0.644252	0.542503	0.450007	0.867653	0.412229
16	2880	0.606385	0.568215	0.645969	0.989874	0.420951
17	3180	0.60019	0.603044	0.601956	1.03296	0.407726
18	3480	0.56226	0.540118	0.731727	0.748009	0.422873
19	3780	0.645158	0.605079	0.599108	0.935861	0.441631
20	4080	0.561113	0.582878	0.640118	0.921674	0.435539
21	4380	0.433202	0.217535	0.590051	1.63779	0.459031

## Sheet: WT-0522-C3
		Raw Data
	Time_(sec)	Roi1	Roi2	Roi3	Roi4	Roi5	Ref_fluo	Background
1	0	1565286	2090994	1760722	1527994	2136282	8.44593e+08	24302159
2	30	1.55389e+06	2.11459e+06	1.78263e+06	1.46432e+06	2.08121e+06	8.43895e+08	2.4336e+07			Filter out Roi3 due to large abrupt change.
3	60	1.5892e+06	2.08978e+06	1.70025e+06	1.50341e+06	2.10979e+06	8.45411e+08	2.43304e+07			Filter out Roi5 due to wrong targeting.
4	90	1.57607e+06	2.09195e+06	1.75769e+06	1.4977e+06	2.03546e+06	8.4244e+08	2.41935e+07
5	120	1.62593e+06	2.10291e+06	1.75326e+06	1.52978e+06	2.09516e+06	8.41337e+08	2.42161e+07
6	150	1.54555e+06	2.11141e+06	1.73503e+06	1.47546e+06	2.08131e+06	8.41039e+08	2.42392e+07
7	180	1.57892e+06	2.07323e+06	1.73642e+06	1.49596e+06	2.09911e+06	8.41576e+08	2.41879e+07
8	210	1.30009e+06	1.50931e+06	1.44259e+06	1.27122e+06	1.85281e+06	8.38887e+08	2.4169e+07
9	240	1.32831e+06	1.56084e+06	1.50706e+06	1.29087e+06	1.82646e+06	8.39276e+08	2.42999e+07
10	270	1.34801e+06	1.59391e+06	1.56869e+06	1.28303e+06	1.86887e+06	8.39007e+08	2.42602e+07
11	300	1.34461e+06	1.60334e+06	1.57457e+06	1.32423e+06	1.90487e+06	8.37784e+08	2.43317e+07
12	330	1.34339e+06	1.64782e+06	1.53067e+06	1.29781e+06	1.87854e+06	8.38297e+08	2.44345e+07
13	360	1.36028e+06	1.64073e+06	1.5382e+06	1.2869e+06	1.89069e+06	8.35034e+08	2.4327e+07
14	390	1.35022e+06	1.63368e+06	1.55758e+06	1.29624e+06	1.87997e+06	8.33772e+08	2.42233e+07
15	690	1.44333e+06	1.69642e+06	1.63843e+06	1.31813e+06	1.86194e+06	8.34007e+08	2.42924e+07
16	990	1.40154e+06	1.73266e+06	1.67025e+06	1.34917e+06	1.86291e+06	8.29636e+08	2.41512e+07
17	1290	1.43497e+06	1.7321e+06	1.65829e+06	1.36449e+06	1.84103e+06	8.29214e+08	2.41968e+07
18	1590	1.52011e+06	1.77345e+06	1.69137e+06	1.40948e+06	1.80256e+06	8.29121e+08	2.41554e+07
19	1890	1.43843e+06	1.80084e+06	1.73066e+06	1.41309e+06	1.8595e+06	8.27247e+08	2.41776e+07
20	2190	1.41599e+06	1.78234e+06	1.81782e+06	1.39671e+06	1.80055e+06	8.24311e+08	2.41847e+07
21	2490	1.41766e+06	1.71592e+06	1.76435e+06	1.34481e+06	1.76507e+06	8.26594e+08	2.40925e+07
22	2790	1.40457e+06	1.81381e+06	1.72868e+06	1.29272e+06	1.76755e+06	8.28206e+08	2.41129e+07
23	3090	1.45496e+06	1.7112e+06	1.76087e+06	1.33003e+06	1.68481e+06	8.2701e+08	2.41292e+07
24	3390	1.48598e+06	1.73002e+06	1.83913e+06	1.42864e+06	1.71359e+06	8.29955e+08	2.42111e+07
25	3690	1.47128e+06	1.72928e+06	1.80993e+06	1.40439e+06	1.70197e+06	8.30478e+08	2.41743e+07
26	3990	1.40946e+06	1.7197e+06	1.79538e+06	1.43448e+06	1.7218e+06	8.26243e+08	2.4085e+07
27	4290	1.43121e+06	1.74271e+06	1.77102e+06	1.46526e+06	1.7774e+06	8.29698e+08	2.40811e+07
28	4590	1.42137e+06	1.69518e+06	1.7951e+06	1.44356e+06	1.77093e+06	8.29452e+08	2.41082e+07
		Background corrected Data
	Time_(sec)	Roi1-bkgd-corr	Roi2-bkgd-corr	Roi3-bkgd-corr	Roi4-bkgd-corr	Roi5-bkgd-corr	Ref_fluo-bkgd-corr
1	0	604523	1.13023e+06	799959	567231	1.17552e+06	2.15593e+08
2	30	591790	1.15249e+06	820532	502219	1.11911e+06	2.1402e+08
3	60	627321	1.1279e+06	738371	541526	1.14791e+06	2.1568e+08
4	90	619607	1.13548e+06	801227	541229	1.07899e+06	2.16253e+08
5	120	668572	1.14555e+06	795900	572417	1.1378e+06	2.14565e+08
6	150	587275	1.15314e+06	776752	517190	1.12303e+06	2.13669e+08
7	180	622677	1.11698e+06	780172	539718	1.14286e+06	2.15534e+08
8	210	344593	553817	487096	315717	897310	2.13335e+08
9	240	367641	600163	546386	330198	865784	2.10335e+08
10	270	388911	634812	609585	323927	909764	2.11095e+08
11	300	382677	641414	612643	362300	942937	2.0802e+08
12	330	377393	681821	564675	331819	912548	2.05873e+08
13	360	398532	678988	576450	325160	928940	2.05392e+08
14	390	392572	676038	599931	338596	922322	2.06814e+08
15	690	482951	736040	678049	357752	901563	2.05261e+08
16	990	446746	777863	715455	394378	908118	2.04545e+08
17	1290	478375	775506	701691	407896	884437	2.02943e+08
18	1590	565152	818490	736406	454514	847600	2.03919e+08
19	1890	482594	845003	774827	457251	903664	2.01473e+08
20	2190	459874	826218	861702	440591	844434	1.98352e+08
21	2490	465188	763448	811871	392335	812595	2.0302e+08
22	2790	451293	860531	775400	339440	814265	2.04105e+08
23	3090	501032	757273	806944	376106	730882	2.02486e+08
24	3390	528815	772858	881970	471477	756423	2.03312e+08
25	3690	515572	773577	854223	448686	746263	2.04788e+08
26	3990	457284	767526	843205	482297	769621	2.02864e+08
27	4290	479191	790691	819002	513235	825378	2.0642e+08
28	4590	468271	742088	842006	490463	817833	2.05472e+08
		Bleaching Corrected Data
	Time_(sec)	Roi1-bkgd_bleach-corr	Roi2-bkgd_bleach-corr	Roi3-bkgd_bleach-corr	Roi4-bkgd_bleach-corr	Roi5-bkgd_bleach-corr
1	0	0.002804	0.00524242	0.0037105	0.00263102	0.00545249
2	30	0.00276511	0.00538496	0.0038339	0.0023466	0.00522901
3	60	0.00290857	0.00522952	0.00342345	0.00251078	0.00532228
4	90	0.00286519	0.00525069	0.00370504	0.00250275	0.00498947
5	120	0.00311594	0.00533894	0.00370937	0.00266781	0.00530282
6	150	0.00274853	0.00539683	0.0036353	0.00242052	0.00525595
7	180	0.002889	0.00518239	0.00361972	0.0025041	0.00530246
8	210	0.00161527	0.002596	0.00228325	0.00147991	0.00420611
9	240	0.00174788	0.00285336	0.00259769	0.00156986	0.00411621
10	270	0.00184235	0.00300723	0.00288773	0.00153451	0.00430974
11	300	0.00183961	0.00308342	0.00294511	0.00174166	0.0045329
12	330	0.00183314	0.00331186	0.00274284	0.00161177	0.00443258
13	360	0.00194035	0.00330582	0.00280658	0.00158312	0.00452277
14	390	0.00189819	0.00326882	0.00290082	0.0016372	0.00445967
15	690	0.00235286	0.00358588	0.00330336	0.00174292	0.00439228
16	990	0.0021841	0.0038029	0.0034978	0.00192808	0.00443971
17	1290	0.00235719	0.0038213	0.00345758	0.00200991	0.00435805
18	1590	0.00277145	0.00401379	0.00361126	0.00222889	0.00415655
19	1890	0.00239533	0.00419412	0.00384581	0.00226954	0.00448529
20	2190	0.00231847	0.00416541	0.0043443	0.00222126	0.00425724
21	2490	0.00229134	0.00376046	0.00399897	0.0019325	0.00400254
22	2790	0.00221108	0.00421611	0.00379902	0.00166306	0.00398943
23	3090	0.0024744	0.00373987	0.00398517	0.00185744	0.00360953
24	3390	0.002601	0.00380133	0.004338	0.00231898	0.0037205
25	3690	0.00251758	0.00377744	0.00417124	0.00219097	0.00364407
26	3990	0.00225414	0.00378345	0.0041565	0.00237744	0.00379378
27	4290	0.00232144	0.00383049	0.00396764	0.00248636	0.00399853
28	4590	0.002279	0.00361162	0.00409791	0.002387	0.00398026
		Normalized Data
	Time_(sec)	Roi1_corr_norm	Roi2_corr_norm	Roi3_corr_norm	Roi4_corr_norm	Roi5_corr_norm
1	0	1	1	1	1	1
2	30	0.986131	1.02719	1.03326	0.891895	0.959015
3	60	1.03729	0.997538	0.922638	0.954298	0.97612
4	90	1.02182	1.00158	0.998527	0.951247	0.915082
5	120	1.11125	1.01841	0.999695	1.01398	0.97255
6	150	0.980218	1.02945	0.979733	0.919992	0.963955
7	180	1.03031	0.988549	0.975535	0.951759	0.972485
8	210	0.576058	0.495191	0.615348	0.562486	0.771412
9	240	0.623352	0.544283	0.700092	0.596674	0.754923
10	270	0.657045	0.573634	0.778259	0.583236	0.790418
11	300	0.656067	0.588166	0.793722	0.661969	0.831346
12	330	0.653758	0.631742	0.739209	0.612601	0.812947
13	360	0.691993	0.630589	0.75639	0.601712	0.829487
14	390	0.676957	0.623532	0.781787	0.622266	0.817914
15	690	0.839111	0.684012	0.890272	0.662447	0.805556
16	990	0.778923	0.72541	0.942674	0.732824	0.814254
17	1290	0.840652	0.728918	0.931836	0.763925	0.799278
18	1590	0.988392	0.765637	0.973255	0.847157	0.762322
19	1890	0.854254	0.800035	1.03647	0.862607	0.822613
20	2190	0.826844	0.794557	1.17081	0.844255	0.78079
21	2490	0.817169	0.717313	1.07774	0.734503	0.734076
22	2790	0.788545	0.804229	1.02386	0.632098	0.731672
23	3090	0.882454	0.713386	1.07403	0.705975	0.661998
24	3390	0.927604	0.72511	1.16912	0.881397	0.682349
25	3690	0.897855	0.720553	1.12417	0.832746	0.668332
26	3990	0.803902	0.721699	1.1202	0.903618	0.695789
27	4290	0.827902	0.730671	1.0693	0.945016	0.733341
28	4590	0.812768	0.688922	1.10441	0.907252	0.72999
		Normalize the bouton fluorescent right after bleaching to 0
	Recovery Time_(sec)
1	0	0	0	0	0	0
2	30	0.105613	0.0955533	0.227986	0.0871582	-0.0849092
3	60	0.180852	0.152683	0.43828	0.0528996	0.0978722
4	90	0.178669	0.180968	0.479879	0.25362	0.308639
5	120	0.173513	0.265783	0.333223	0.127761	0.213891
6	150	0.258897	0.26354	0.379444	0.100001	0.299066
7	180	0.22532	0.249803	0.447769	0.152402	0.23947
8	480	0.587429	0.367521	0.739626	0.254839	0.17583
9	780	0.453022	0.448098	0.880603	0.434255	0.220621
10	1080	0.59087	0.454927	0.851444	0.513544	0.143501
11	1380	0.920792	0.526397	0.962874	0.725733	-0.0468111
12	1680	0.621245	0.59335	1.13293	0.76512	0.263666
13	1980	0.560036	0.582687	1.49436	0.718336	0.0482921
14	2280	0.538431	0.432339	1.24398	0.438537	-0.192266
15	2580	0.474509	0.601512	1.099	0.177466	-0.204645
16	2880	0.684219	0.424695	1.23398	0.365806	-0.563441
17	3180	0.785045	0.447515	1.4898	0.813025	-0.458641
18	3480	0.718611	0.438645	1.36889	0.688994	-0.530823
19	3780	0.508803	0.440875	1.3582	0.869674	-0.389429
20	4080	0.562398	0.45834	1.22127	0.975213	-0.196052
21	4380	0.528602	0.377079	1.31571	0.87894	-0.213309

## Sheet: WT-0523-C1
		Raw Data
	Time_(sec)	Roi1	Roi2	Roi3	Roi4	Roi5	Ref_fluo	Background
1	0	830226	748328	1033587	2083125	891324	800504937	8991663			Filter out due to large abrupt change.
2	30	759943	745229	1.0192e+06	1.83897e+06	824044	7.92907e+08	8.9169e+06
3	60	778116	768693	1.1003e+06	1.69833e+06	869424	802675412	9.09286e+06
4	90	776754	728898	1.05302e+06	1.81362e+06	834917	7.95323e+08	9.07793e+06
5	120	786408	824656	1.05624e+06	1.77277e+06	836526	7.91792e+08	8.99743e+06
6	150	765607	732489	1.03615e+06	1.65285e+06	828928	7.94261e+08	9.06795e+06
7	180	745087	750036	1.05306e+06	1.69769e+06	938831	7.96637e+08	9.10241e+06
8	210	579062	575521	617515	1.0809e+06	606092	7.89223e+08	9.10755e+06
9	240	621019	578816	714655	1.20929e+06	620157	7.83537e+08	8.96457e+06
10	270	601128	617760	749650	1.15767e+06	737138	7.84431e+08	9.04024e+06
11	300	615358	609621	728334	1.14645e+06	702850	7.87278e+08	9.03878e+06
12	330	596159	613835	761168	1.18887e+06	700278	7.83753e+08	9.00772e+06
13	360	597833	583672	784965	1.2487e+06	720525	7.85628e+08	8.98457e+06
14	390	600162	615613	744340	1.42705e+06	1.15894e+06	7.78665e+08	8.9815e+06
15	690	615576	671631	955834	2.02335e+06	552572	7.91126e+08	9.03643e+06
16	990	650404	654230	1.14229e+06	2.00384e+06	590865	8.00903e+08	9.10973e+06
17	1290	682008	676763	979886	2.03589e+06	711143	7.94729e+08	9.00162e+06
18	1590	606590	687830	989609	1.88905e+06	935310	7.95041e+08	8.95717e+06
19	1890	617657	655208	672290	1.92342e+06	1.10305e+06	7.9978e+08	9.01486e+06
20	2190	646010	683774	817677	2.00487e+06	897789	7.99414e+08	9.0943e+06
21	2490	637465	636067	779482	2.07625e+06	991677	8.05296e+08	9.14037e+06
22	2790	666407	721606	860950	2.00882e+06	1.16797e+06	8.04557e+08	9.14475e+06
23	3090	739436	697226	854808	1.91691e+06	1.15171e+06	7.97462e+08	8.92001e+06
24	3390	693369	685318	812994	1.96027e+06	931396	8.06359e+08	9.09322e+06
25	3690	696027	668845	972867	1.93296e+06	809828	8.09497e+08	9.11539e+06
26	3990	657736	709389	749886	1.98426e+06	859540	8.05346e+08	9.07512e+06
27	4290	692429	713467	833649	1.94335e+06	947697	8.05794e+08	9.06956e+06
28	4590	675939	714098	927172	1.80601e+06	944690	8.12518e+08	9.20184e+06
		Background corrected Data
	Time_(sec)	Roi1-bkgd-corr	Roi2-bkgd-corr	Roi3-bkgd-corr	Roi4-bkgd-corr	Roi5-bkgd-corr	Ref_fluo-bkgd-corr
1	0	460008	378110	663369	1.71291e+06	521106	4.07385e+08
2	30	392804	378090	652063	1.47183e+06	456905	403055514
3	60	403731	394309	725911	1.32395e+06	495040	4.05131e+08
4	90	402984	355128	679245	1.43985e+06	461148	3.98431e+08
5	120	415952	454200	685780	1.40232e+06	466071	3.98419e+08
6	150	392248	359130	662789	1.27949e+06	455569	3.97805e+08
7	180	370310	375259	678283	1.32291e+06	564053	3.98674e+08
8	210	204073	200532	242526	705912	231103	3.91036e+08
9	240	251917	209713	345552	840187	251055	391601434
10	270	228911	245542	377432	785449	364920	3.89187e+08
11	300	243201	237463	356177	774292	330692	3.92098e+08
12	330	225280	242956	390289	817990	329399	3.8993e+08
13	360	227907	213746	415039	878778	350599	3.92818e+08
14	390	230363	245814	374541	1.05725e+06	789143	385988878
15	690	243515	299570	583773	1.65129e+06	180511	3.96048e+08
16	990	275325	279151	767212	1.62877e+06	215786	4.0262e+08
17	1290	311381	306136	609258	1.66526e+06	340516	4.01173e+08
18	1590	237792	319033	620812	1.52025e+06	566512	4.03428e+08
19	1890	246484	284035	301117	1.55225e+06	731875	405645725
20	2190	271567	309330	443234	1.63043e+06	523345	4.01806e+08
21	2490	261125	259726	403141	1.69991e+06	615336	4.05674e+08
22	2790	289886	345085	484429	1.6323e+06	791446	4.04743e+08
23	3090	372168	329958	487540	1.54965e+06	784442	4.07475e+08
24	3390	318970	310919	438594	1.58587e+06	556997	4.08798e+08
25	3690	320715	293533	597555	1.55765e+06	434516	4.10967e+08
26	3990	284081	335735	376232	1.6106e+06	485886	4.08577e+08
27	4290	319004	340041	460223	1.56993e+06	574272	4.09267e+08
28	4590	297067	335226	548301	1.42713e+06	565818	4.10209e+08
		Bleaching Corrected Data
	Time_(sec)	Roi1-bkgd_bleach-corr	Roi2-bkgd_bleach-corr	Roi3-bkgd_bleach-corr	Roi4-bkgd_bleach-corr	Roi5-bkgd_bleach-corr
1	0	0.00112917	0.000928141	0.00162836	0.00420464	0.00127915
2	30	0.000974566	0.00093806	0.0016178	0.00365168	0.0011336
3	60	0.000996546	0.000973288	0.0017918	0.00326796	0.00122193
4	90	0.00101143	0.000891317	0.0017048	0.0036138	0.00115741
5	120	0.00104401	0.00114001	0.00172125	0.00351971	0.0011698
6	150	0.000986031	0.000902779	0.00166611	0.00321637	0.00114521
7	180	0.000928853	0.000941266	0.00170135	0.00331828	0.00141482
8	210	0.000521878	0.000512822	0.000620214	0.00180524	0.000591002
9	240	0.000643299	0.000535527	0.000882408	0.00214552	0.000641099
10	270	0.000588176	0.000630911	0.000969796	0.00201818	0.000937647
11	300	0.000620255	0.000605623	0.000908387	0.00197474	0.000843391
12	330	0.000577744	0.000623076	0.00100092	0.00209779	0.000844765
13	360	0.000580185	0.000544136	0.00105657	0.00223711	0.000892523
14	390	0.000596813	0.000636843	0.000970341	0.00273906	0.00204447
15	690	0.000614861	0.000756398	0.00147399	0.00416941	0.00045578
16	990	0.000683833	0.000693334	0.00190555	0.00404541	0.000535955
17	1290	0.000776176	0.000763101	0.00151869	0.00415098	0.0008488
18	1590	0.000589429	0.000790804	0.00153884	0.00376834	0.00140424
19	1890	0.000607634	0.000700204	0.000742316	0.00382661	0.00180422
20	2190	0.000675865	0.00076985	0.0011031	0.00405775	0.00130248
21	2490	0.000643681	0.000640234	0.000993756	0.00419032	0.00151683
22	2790	0.000716222	0.000852603	0.00119688	0.00403292	0.00195543
23	3090	0.000913353	0.000809765	0.00119649	0.00380305	0.00192513
24	3390	0.000780263	0.000760567	0.00107289	0.00387935	0.00136252
25	3690	0.000780391	0.00071425	0.00145402	0.00379021	0.0010573
26	3990	0.000695295	0.000821718	0.000920834	0.00394198	0.00118921
27	4290	0.000779451	0.000830854	0.00112451	0.00383594	0.00140317
28	4590	0.000724185	0.00081721	0.00133664	0.00347904	0.00137934
		Normalized Data
	Time_(sec)	Roi1_corr_norm	Roi2_corr_norm	Roi3_corr_norm	Roi4_corr_norm	Roi5_corr_norm
1	0	1	1	1	1	1
2	30	0.863078	1.01069	0.993515	0.868486	0.886216
3	60	0.882544	1.04864	1.10037	0.777226	0.955264
4	90	0.895724	0.960326	1.04694	0.859478	0.904827
5	120	0.924575	1.22827	1.05705	0.8371	0.914513
6	150	0.873232	0.972675	1.02318	0.764956	0.895287
7	180	0.822595	1.01414	1.04482	0.789194	1.10606
8	210	0.462177	0.552526	0.380882	0.429344	0.462027
9	240	0.569708	0.576989	0.541899	0.510273	0.501191
10	270	0.520891	0.679758	0.595566	0.479988	0.733023
11	300	0.5493	0.652512	0.557854	0.469657	0.659337
12	330	0.511652	0.671316	0.614679	0.498921	0.660411
13	360	0.513813	0.586264	0.648853	0.532057	0.697747
14	390	0.528539	0.686149	0.5959	0.651437	1.5983
15	690	0.544523	0.814961	0.905201	0.99162	0.356315
16	990	0.605605	0.747014	1.17022	0.96213	0.418993
17	1290	0.687384	0.822182	0.93265	0.987237	0.663565
18	1590	0.522	0.85203	0.945024	0.896232	1.09779
19	1890	0.538122	0.754416	0.455867	0.910092	1.41049
20	2190	0.598548	0.829454	0.677432	0.965064	1.01824
21	2490	0.570046	0.689803	0.61028	0.996594	1.18581
22	2790	0.634289	0.918614	0.735021	0.959158	1.52869
23	3090	0.808868	0.872459	0.734783	0.904489	1.50501
24	3390	0.691003	0.819453	0.658876	0.922634	1.06518
25	3690	0.691116	0.769549	0.892937	0.901434	0.826566
26	3990	0.615755	0.885338	0.565497	0.937531	0.929691
27	4290	0.690284	0.895181	0.690575	0.912311	1.09696
28	4590	0.64134	0.88048	0.820849	0.827429	1.07833
		Normalize the bouton fluorescent right after bleaching to 0
	Recovery Time_(sec)
1	0	0	0	0	0	0
2	30	0.248708	0.0508588	0.245042	0.195952	0.0799738
3	60	0.135799	0.264511	0.326714	0.122625	0.553379
4	90	0.201506	0.207867	0.269322	0.0976097	0.402911
5	120	0.114431	0.24696	0.355801	0.168466	0.405103
6	150	0.11943	0.070141	0.407809	0.248698	0.481344
7	180	0.15349	0.277798	0.327222	0.537749	2.3203
8	480	0.190458	0.545593	0.797928	1.36143	-0.215866
9	780	0.331734	0.404335	1.20125	1.29002	-0.0878758
10	1080	0.52088	0.560606	0.839702	1.35082	0.411545
11	1380	0.138365	0.622659	0.858533	1.13047	1.29825
12	1680	0.175654	0.419723	0.114115	1.16403	1.93677
13	1980	0.315412	0.575725	0.4513	1.29713	1.1358
14	2280	0.24949	0.285394	0.349106	1.37347	1.47797
15	2580	0.398077	0.761085	0.538941	1.28283	2.17815
16	2880	0.801861	0.66513	0.53858	1.15046	2.12979
17	3180	0.529251	0.554932	0.423061	1.19439	1.23164
18	3480	0.529513	0.451185	0.779264	1.14306	0.744396
19	3780	0.35521	0.691905	0.280954	1.23046	0.954978
20	4080	0.527588	0.712368	0.471302	1.1694	1.29654
21	4380	0.414387	0.681806	0.669558	0.963875	1.2585

## Sheet: WT-0524-C1
		Raw Data
	Time_(sec)	Roi1	Roi2	Roi3	Roi4	Roi5	Ref_fluo	Background
1	0	1437634	1688812	1458501	1709387	1337782	970612443	15109259
2	30	1.50782e+06	1.73957e+06	1.43836e+06	1.75789e+06	1.42069e+06	9.66204e+08	1.50813e+07
3	60	1.47978e+06	1.73046e+06	1.42769e+06	1.76134e+06	1.28008e+06	9.66285e+08	1.50765e+07
4	90	1.49509e+06	1.70914e+06	1.41756e+06	1.71477e+06	1.3213e+06	9.64553e+08	1.51518e+07
5	120	1.50956e+06	1.707e+06	1.45642e+06	1.73801e+06	1.29306e+06	9.63858e+08	1.50655e+07
6	150	1.50484e+06	1.67737e+06	1.41167e+06	1.75233e+06	1.28049e+06	9.63185e+08	1.49258e+07
7	180	1.47511e+06	1.70673e+06	1.43356e+06	1.71589e+06	1.2644e+06	9.61542e+08	1.49896e+07
8	210	1.12902e+06	1.15221e+06	1.06894e+06	1.18873e+06	987033	9.56331e+08	1.49637e+07
9	240	1.19705e+06	1.24115e+06	1.10904e+06	1.24787e+06	1.01403e+06	9.68935e+08	1.51952e+07
10	270	1.1389e+06	1.19089e+06	1.10341e+06	1.24027e+06	981345	9.54182e+08	1.47751e+07
11	300	1.1473e+06	1.24717e+06	1.16666e+06	1.23324e+06	994544	9.64712e+08	1.51137e+07
12	330	1.17533e+06	1.28817e+06	1.15561e+06	1.20922e+06	1.01094e+06	9.56233e+08	1.49128e+07
13	360	1.15931e+06	1.26038e+06	1.11035e+06	1.22018e+06	1.05017e+06	9.54686e+08	1.48857e+07
14	390	1.23373e+06	1.24271e+06	1.12918e+06	1.25257e+06	1.04929e+06	9.61423e+08	1.49868e+07
15	690	1.23578e+06	1.30387e+06	1.17284e+06	1.27528e+06	1.10105e+06	973598652	1.50884e+07
16	990	1.26739e+06	1.26612e+06	1.15296e+06	1.27948e+06	1.10888e+06	9.82579e+08	1.50491e+07
17	1290	1.32207e+06	1.2982e+06	1.16822e+06	1.29333e+06	1.10933e+06	9.81912e+08	1.49572e+07
18	1590	1.31161e+06	1.30641e+06	1.14581e+06	1.2799e+06	1.15731e+06	9.85237e+08	1.51111e+07
19	1890	1.30831e+06	1.34108e+06	1.1665e+06	1.30331e+06	1.11128e+06	9.89061e+08	1.49824e+07
20	2190	1.29471e+06	1.39021e+06	1.17484e+06	1.32406e+06	1.08999e+06	9.8518e+08	1.50231e+07
21	2490	1.29426e+06	1.39887e+06	1.16244e+06	1.36629e+06	1.10629e+06	9.89238e+08	1.51239e+07
22	2790	1.30962e+06	1.39505e+06	1.15299e+06	1.30838e+06	1.09898e+06	9.83073e+08	1.49063e+07
23	3090	1.2957e+06	1.42877e+06	1.15753e+06	1.32432e+06	1.08266e+06	9.90627e+08	1.49984e+07
24	3390	1.27135e+06	1.50095e+06	1.1257e+06	1.3316e+06	1.08323e+06	9.82437e+08	1.48201e+07
25	3690	1.31391e+06	1.45189e+06	1.16627e+06	1.31494e+06	1.127e+06	9.91737e+08	1.50025e+07
26	3990	1.27443e+06	1.50659e+06	1.16882e+06	1.28964e+06	1.16399e+06	9.8784e+08	1.48205e+07
27	4290	1.32545e+06	1.49562e+06	1.15931e+06	1.26371e+06	1.14895e+06	9.82975e+08	1.47789e+07
28	4590	1.21767e+06	1.36244e+06	1.11441e+06	1.18202e+06	1.07976e+06	9.17769e+08	1.37735e+07
		Background corrected Data
	Time_(sec)	Roi1-bkgd-corr	Roi2-bkgd-corr	Roi3-bkgd-corr	Roi4-bkgd-corr	Roi5-bkgd-corr	Ref_fluo-bkgd-corr
1	0	627931	879109	648798	899684	528079	434485483
2	30	699613	931370	630152	949686	612484	4.31069e+08
3	60	671836	922517	619743	953390	472132	4.3132e+08
4	90	683105	897156	605581	902787	509316	4.26917e+08
5	120	702201	899647	649068	930651	485700	4.29284e+08
6	150	704970	877499	611803	952455	480622	433567719
7	180	671826	903442	630271	912606	461116	4.29663e+08
8	210	327122	350304	267042	386829	185132	4.2537e+08
9	240	382740	426844	294730	433564	199724	4.29758e+08
10	270	347101	399092	311611	448472	189548	4.2991e+08
11	300	337359	437224	356716	423301	184603	4.28428e+08
12	330	376156	488995	356439	410046	211771	4.27078e+08
13	360	361584	462656	312627	422459	252453	426492128
14	390	430592	439567	326045	449427	246153	4.29642e+08
15	690	427193	495288	364251	466695	292463	4.38212e+08
16	990	460908	459636	346480	473001	302400	4.48586e+08
17	1290	520513	496649	366666	491779	307779	4.5118e+08
18	1590	501811	496611	336005	470094	347505	4.49044e+08
19	1890	505407	538175	363600	500408	308379	457435155
20	2190	489624	585131	369757	518971	284904	4.52111e+08
21	2490	483776	588382	351953	555802	295800	4.52591e+08
22	2790	510791	596227	354167	509556	300154	454146820
23	3090	491942	625007	353763	520561	278896	4.58433e+08
24	3390	477141	706749	331497	537401	289024	4.56572e+08
25	3690	509923	647910	362286	510956	323019	4.59398e+08
26	3990	480207	712361	374593	495415	369768	4.6196e+08
27	4290	533452	703618	367308	471716	356951	458571069
28	4590	479545	624316	376290	443896	341636	4.29039e+08
		Bleaching Corrected Data
	Time_(sec)	Roi1-bkgd_bleach-corr	Roi2-bkgd_bleach-corr	Roi3-bkgd_bleach-corr	Roi4-bkgd_bleach-corr	Roi5-bkgd_bleach-corr
1	0	0.00144523	0.00202333	0.00149326	0.00207069	0.00121541
2	30	0.00162297	0.0021606	0.00146184	0.00220309	0.00142085
3	60	0.00155763	0.00213882	0.00143685	0.0022104	0.00109462
4	90	0.00160009	0.00210147	0.0014185	0.00211466	0.00119301
5	120	0.00163575	0.00209569	0.00151198	0.00216791	0.00113142
6	150	0.00162597	0.0020239	0.00141109	0.00219678	0.00110853
7	180	0.00156361	0.00210268	0.0014669	0.002124	0.0010732
8	210	0.00076903	0.000823528	0.000627788	0.000909393	0.000435225
9	240	0.000890594	0.000993219	0.000685805	0.00100886	0.000464736
10	270	0.000807379	0.000928314	0.000724828	0.00104317	0.0004409
11	300	0.000787435	0.00102053	0.000832616	0.000988035	0.000430886
12	330	0.000880766	0.00114498	0.000834599	0.000960121	0.00049586
13	360	0.00084781	0.00108479	0.000733019	0.000990544	0.000591929
14	390	0.00100221	0.0010231	0.000758878	0.00104605	0.000572927
15	690	0.000974857	0.00113025	0.000831222	0.001065	0.000667401
16	990	0.00102747	0.00102463	0.000772382	0.00105443	0.000674118
17	1290	0.00115367	0.00110078	0.000812682	0.00108998	0.000682164
18	1590	0.00111751	0.00110593	0.000748268	0.00104688	0.000773877
19	1890	0.00110487	0.0011765	0.000794867	0.00109394	0.000674148
20	2190	0.00108297	0.00129422	0.000817846	0.00114788	0.000630165
21	2490	0.0010689	0.00130003	0.000777639	0.00122804	0.00065357
22	2790	0.00112473	0.00131285	0.000779851	0.00112201	0.000660918
23	3090	0.00107309	0.00136335	0.000771679	0.00113552	0.000608367
24	3390	0.00104505	0.00154795	0.000726058	0.00117704	0.000633031
25	3690	0.00110998	0.00141035	0.00078861	0.00111223	0.000703136
26	3990	0.0010395	0.00154204	0.000810878	0.00107242	0.000800433
27	4290	0.00116329	0.00153437	0.000800984	0.00102866	0.000778398
28	4590	0.00111772	0.00145515	0.000877052	0.00103463	0.000796283
		Normalized Data
	Time_(sec)	Roi1_corr_norm	Roi2_corr_norm	Roi3_corr_norm	Roi4_corr_norm	Roi5_corr_norm
1	0	1	1	1	1	1
2	30	1.12299	1.06784	0.978957	1.06394	1.16903
3	60	1.07777	1.05708	0.962226	1.06747	0.900616
4	90	1.10715	1.03862	0.949935	1.02124	0.981566
5	120	1.13183	1.03576	1.01254	1.04695	0.930892
6	150	1.12506	1.00028	0.944975	1.0609	0.912058
7	180	1.08191	1.03921	0.982347	1.02575	0.882996
8	210	0.532116	0.407015	0.420415	0.439174	0.358088
9	240	0.61623	0.490882	0.459268	0.487208	0.382369
10	270	0.558651	0.458804	0.485401	0.503782	0.362758
11	300	0.544851	0.504382	0.557584	0.477153	0.354518
12	330	0.60943	0.565887	0.558912	0.463672	0.407977
13	360	0.586627	0.536142	0.490886	0.478364	0.487018
14	390	0.693463	0.505651	0.508203	0.505171	0.471384
15	690	0.674534	0.558607	0.55665	0.514321	0.549115
16	990	0.710937	0.506408	0.517246	0.509215	0.554641
17	1290	0.798261	0.544042	0.544234	0.526387	0.561261
18	1590	0.77324	0.546587	0.501098	0.50557	0.63672
19	1890	0.764496	0.581468	0.532304	0.528299	0.554666
20	2190	0.749344	0.639647	0.547693	0.554349	0.518478
21	2490	0.739607	0.642518	0.520767	0.593061	0.537735
22	2790	0.778234	0.648855	0.522248	0.541852	0.54378
23	3090	0.742507	0.673815	0.516776	0.548379	0.500543
24	3390	0.723104	0.765048	0.486224	0.568426	0.520836
25	3690	0.768032	0.697041	0.528114	0.53713	0.578516
26	3990	0.719262	0.762129	0.543027	0.517905	0.658568
27	4290	0.804918	0.758338	0.536401	0.496774	0.640439
28	4590	0.773385	0.719184	0.587342	0.499655	0.655155
		Normalize the bouton fluorescent right after bleaching to 0
	Recovery Time_(sec)
1	0	0	0	0	0	0
2	30	0.150131	0.133738	0.0699488	0.0798279	0.0397989
3	60	0.0473611	0.0825845	0.116998	0.107372	0.00765335
4	90	0.0227305	0.155265	0.246956	0.0631172	-0.00585262
5	120	0.137994	0.253343	0.249346	0.0407137	0.0817736
6	150	0.0972936	0.205911	0.126874	0.0651309	0.211334
7	180	0.28798	0.157289	0.158051	0.10968	0.185708
8	480	0.254195	0.241734	0.245274	0.124887	0.313119
9	780	0.319169	0.158496	0.174333	0.116402	0.322177
10	1080	0.475029	0.218509	0.222921	0.14494	0.333028
11	1380	0.43037	0.222568	0.145259	0.110343	0.456715
12	1680	0.414763	0.278191	0.201442	0.148117	0.322218
13	1980	0.387719	0.370965	0.229147	0.19141	0.262901
14	2280	0.370341	0.375543	0.180671	0.255746	0.294465
15	2580	0.439285	0.385649	0.183338	0.170642	0.304375
16	2880	0.375517	0.425452	0.173486	0.181489	0.233504
17	3180	0.340885	0.570936	0.118481	0.214806	0.266767
18	3480	0.421075	0.462488	0.193898	0.162795	0.361312
19	3780	0.334028	0.56628	0.220747	0.130843	0.492528
20	4080	0.486912	0.560235	0.208817	0.0957258	0.462812
21	4380	0.430629	0.497799	0.300531	0.100513	0.486933

## Sheet: WT-0605-C2
		Raw Data
	Time_(sec)	Roi1	Roi2	Roi3	Roi4	Roi5	Ref_fluo	Background
1	0	951797	1986768	1577879	1235047	2038336	945718217	6907572
2	30	922838	2.01031e+06	1.54252e+06	1.20693e+06	1.95182e+06	9.02315e+08	6.86467e+06			Filter out due to large abrupt change.
3	60	956777	2.07591e+06	1.47502e+06	1.29146e+06	2.03107e+06	9.55185e+08	7.0325e+06
4	90	1.04149e+06	1.91774e+06	1.47411e+06	1.28408e+06	2.01387e+06	9.21588e+08	6.95932e+06
5	120	977771	2.123e+06	1.53523e+06	1.34152e+06	2.13954e+06	9.702e+08	7.05219e+06
6	150	949440	2.1297e+06	1.56002e+06	1.22307e+06	1.99255e+06	9.31256e+08	6.90729e+06
7	180	929684	2.14953e+06	1.55313e+06	1.31422e+06	2.05028e+06	9.67016e+08	7.05367e+06
8	210	762371	1.27983e+06	1.00925e+06	876044	1.36574e+06	9.22446e+08	6.88607e+06
9	240	781769	1.37814e+06	1.05514e+06	905346	1.46964e+06	9.51038e+08	6.77093e+06
10	270	768544	1.47793e+06	1.051e+06	928030	1.49379e+06	9.33775e+08	6.97999e+06
11	300	790689	1.70033e+06	1.10297e+06	963203	1.4936e+06	9.76148e+08	7.03956e+06
12	330	763918	1.61691e+06	1.02737e+06	971420	1.53023e+06	9.33085e+08	6.87577e+06
13	360	808532	1.58168e+06	1.07644e+06	987415	1.52312e+06	9.71605e+08	7.06669e+06
14	390	797512	1.57239e+06	1.0341e+06	992724	1.49758e+06	9.40487e+08	7.01148e+06
15	690	838070	1.80969e+06	1.24721e+06	1.0161e+06	1.55181e+06	9.74243e+08	7.04544e+06
16	990	852820	1.92653e+06	1.57406e+06	969412	1.65465e+06	1.00037e+09	6.7974e+06
17	1290	862831	2.04272e+06	1.80142e+06	949439	1.68217e+06	9.79556e+08	6.87543e+06
18	1590	913946	2.09039e+06	2.01504e+06	984990	1.68276e+06	1.01505e+09	7.05141e+06
19	1890	909234	2.10451e+06	2.01128e+06	1.0054e+06	1.75257e+06	1.00153e+09	7.02413e+06
20	2190	953680	2.0466e+06	2.20107e+06	1.03548e+06	2.00347e+06	1.0285e+09	7.06646e+06
21	2490	820790	1.97164e+06	1.98507e+06	1.0078e+06	1.84485e+06	9.96462e+08	6.8538e+06
22	2790	867155	2.05688e+06	1.83232e+06	1.05979e+06	1.98934e+06	1.01228e+09	6.92654e+06
23	3090	945999	2.07945e+06	2.10248e+06	1.14029e+06	2.00711e+06	1.01564e+09	6.94245e+06
24	3390	1.06581e+06	2.10734e+06	1.96422e+06	1.1245e+06	2.26064e+06	1.05272e+09	7.0887e+06
25	3690	996514	1.99665e+06	1.97548e+06	965605	2.23449e+06	1.02072e+09	6.99838e+06
26	3990	1.02875e+06	2.03439e+06	1.85427e+06	1.02578e+06	2.20494e+06	1.0386e+09	6.99186e+06
27	4290	972122	1.91241e+06	1.91855e+06	1.21365e+06	2.23104e+06	1.02347e+09	6.99737e+06
28	4590	1.1104e+06	1.98208e+06	2.28783e+06	1.21655e+06	2.16753e+06	1.03049e+09	6.93967e+06
		Background corrected Data
	Time_(sec)	Roi1-bkgd-corr	Roi2-bkgd-corr	Roi3-bkgd-corr	Roi4-bkgd-corr	Roi5-bkgd-corr	Ref_fluo-bkgd-corr
1	0	433613	1.46858e+06	1.0597e+06	716863	1.52015e+06	5.20697e+08
2	30	407873	1.49534e+06	1.02755e+06	691969	1.43686e+06	4.79933e+08
3	60	429221	1.54836e+06	947464	763901	1.50352e+06	5.22477e+08
4	90	519420	1.39567e+06	952040	762013	1.49181e+06	4.93382e+08
5	120	448739	1.59397e+06	1.00619e+06	812488	1.61051e+06	5.3628e+08
6	150	431277	1.61154e+06	1.04186e+06	704904	1.47439e+06	5.06252e+08
7	180	400541	1.62038e+06	1.02398e+06	785080	1.52114e+06	5.33005e+08
8	210	245801	763256	492676	359474	849172	4.98748e+08
9	240	273836	870211	547207	397413	961703	5.34424e+08
10	270	244928	954314	527380	404414	970173	5.04297e+08
11	300	262605	1.17224e+06	574887	435118	965513	5.43006e+08
12	330	248120	1.10112e+06	511572	455622	1.01443e+06	5.10021e+08
13	360	278412	1.05156e+06	546324	457295	993000	5.36793e+08
14	390	271533	1.04641e+06	508125	466745	971606	5.09072e+08
15	690	309544	1.28116e+06	718679	487577	1.02328e+06	5.40738e+08
16	990	342901	1.41661e+06	1.06415e+06	459494	1.14474e+06	5.82128e+08
17	1290	347058	1.52694e+06	1.28565e+06	433666	1.1664e+06	5.56512e+08
18	1590	384973	1.56141e+06	1.48607e+06	456017	1.15379e+06	5.81176e+08
19	1890	382307	1.57759e+06	1.48435e+06	478476	1.22565e+06	5.69333e+08
20	2190	423578	1.5165e+06	1.67097e+06	505373	1.47337e+06	5.93707e+08
21	2490	306640	1.45749e+06	1.47092e+06	493649	1.3307e+06	5.74749e+08
22	2790	347549	1.53727e+06	1.31271e+06	540188	1.46974e+06	5.86087e+08
23	3090	425199	1.55865e+06	1.58168e+06	619492	1.48631e+06	5.88474e+08
24	3390	534038	1.57557e+06	1.43245e+06	592734	1.72887e+06	6.16552e+08
25	3690	471518	1.47165e+06	1.45048e+06	440609	1.70949e+06	5.90106e+08
26	3990	504240	1.50988e+06	1.32977e+06	501277	1.68043e+06	6.08394e+08
27	4290	447202	1.38749e+06	1.39363e+06	688734	1.70612e+06	5.92926e+08
28	4590	589812	1.46149e+06	1.76724e+06	695962	1.64694e+06	6.03489e+08
		Bleaching Corrected Data
	Time_(sec)	Roi1-bkgd_bleach-corr	Roi2-bkgd_bleach-corr	Roi3-bkgd_bleach-corr	Roi4-bkgd_bleach-corr	Roi5-bkgd_bleach-corr
1	0	0.000832756	0.00282042	0.00203515	0.00137674	0.00291946
2	30	0.000849854	0.00311573	0.00214103	0.0014418	0.00299387
3	60	0.000821513	0.00296349	0.00181341	0.00146208	0.00287767
4	90	0.00105278	0.00282878	0.00192962	0.00154447	0.00302364
5	120	0.000836761	0.00297227	0.00187624	0.00151504	0.00300311
6	150	0.000851902	0.00318328	0.00205798	0.0013924	0.00291236
7	180	0.000751477	0.00304009	0.00192115	0.00147293	0.00285389
8	210	0.000492835	0.00153034	0.000987826	0.000720752	0.00170261
9	240	0.000512395	0.00162832	0.00102392	0.000743629	0.00179951
10	270	0.000485682	0.00189236	0.00104577	0.000801935	0.00192381
11	300	0.000483613	0.00215881	0.00105871	0.000801314	0.00177809
12	330	0.00048649	0.00215897	0.00100304	0.00089334	0.001989
13	360	0.000518659	0.00195897	0.00101775	0.000851902	0.00184987
14	390	0.000533389	0.00205553	0.000998141	0.000916855	0.00190858
15	690	0.000572446	0.00236928	0.00132907	0.000901688	0.00189238
16	990	0.000589048	0.0024335	0.00182803	0.000789335	0.00196647
17	1290	0.000623631	0.00274378	0.00231019	0.000779258	0.00209591
18	1590	0.000662403	0.00268664	0.00255701	0.000784645	0.00198527
19	1890	0.000671499	0.00277094	0.00260717	0.000840414	0.00215278
20	2190	0.000713445	0.00255429	0.00281446	0.000851216	0.00248164
21	2490	0.00053352	0.00253586	0.00255924	0.000858896	0.00231527
22	2790	0.000592999	0.00262294	0.00223979	0.000921686	0.00250771
23	3090	0.000722546	0.00264862	0.00268776	0.00105271	0.00252571
24	3390	0.000866169	0.00255546	0.00232333	0.000961369	0.0028041
25	3690	0.00079904	0.00249388	0.002458	0.00074666	0.00289692
26	3990	0.000828805	0.00248175	0.0021857	0.000823935	0.00276208
27	4290	0.000754229	0.00234008	0.00235043	0.00116158	0.00287746
28	4590	0.000977336	0.00242173	0.00292837	0.00115323	0.00272902
		Normalized Data
	Time_(sec)	Roi1_corr_norm	Roi2_corr_norm	Roi3_corr_norm	Roi4_corr_norm	Roi5_corr_norm
1	0	1	1	1	1	1
2	30	1.02053	1.1047	1.05203	1.04726	1.02549
3	60	0.986498	1.05073	0.891045	1.06199	0.985687
4	90	1.26421	1.00296	0.948147	1.12183	1.03568
5	120	1.00481	1.05384	0.921919	1.10046	1.02865
6	150	1.02299	1.12865	1.01122	1.01137	0.997568
7	180	0.902397	1.07789	0.943984	1.06987	0.977542
8	210	0.591812	0.542594	0.485382	0.523521	0.583192
9	240	0.6153	0.577331	0.503117	0.540138	0.616386
10	270	0.583222	0.670951	0.513856	0.582489	0.658962
11	300	0.580738	0.76542	0.520214	0.582038	0.609048
12	330	0.584193	0.765476	0.492859	0.648881	0.68129
13	360	0.622822	0.694565	0.500088	0.618783	0.633636
14	390	0.640511	0.728801	0.490451	0.665961	0.653746
15	690	0.687412	0.840045	0.653058	0.654945	0.648195
16	990	0.707348	0.862814	0.898227	0.573337	0.673572
17	1290	0.748876	0.972825	1.13515	0.566017	0.717909
18	1590	0.795435	0.952567	1.25642	0.56993	0.680013
19	1890	0.806357	0.982455	1.28107	0.610438	0.737389
20	2190	0.856728	0.90564	1.38293	0.618284	0.850035
21	2490	0.640667	0.899108	1.25752	0.623862	0.793048
22	2790	0.712091	0.929982	1.10056	0.66947	0.858965
23	3090	0.867655	0.939088	1.32067	0.76464	0.865129
24	3390	1.04012	0.906055	1.1416	0.698294	0.960487
25	3690	0.959512	0.884222	1.20777	0.542339	0.99228
26	3990	0.995255	0.879922	1.07397	0.598468	0.946093
27	4290	0.905702	0.82969	1.15492	0.843721	0.985613
28	4590	1.17362	0.858642	1.4389	0.837653	0.93477
		Normalize the bouton fluorescent right after bleaching to 0
	Recovery Time_(sec)
1	0	0	0	0	0	0
2	30	0.0537524	0.0671596	0.0368311	0.0310339	0.0782792
3	60	-0.0196588	0.248161	0.0591319	0.110128	0.178685
4	90	-0.025344	0.430805	0.0723361	0.109286	0.0609741
5	120	-0.0174364	0.430915	0.0155279	0.234122	0.23134
6	150	0.0709656	0.293817	0.0305405	0.17791	0.11896
7	180	0.111447	0.360008	0.0105264	0.266021	0.166384
8	480	0.218781	0.575084	0.348218	0.245447	0.153294
9	780	0.264405	0.619105	0.857372	0.0930354	0.21314
10	1080	0.359444	0.831798	1.34939	0.0793653	0.317699
11	1380	0.465994	0.792632	1.60125	0.0866731	0.228328
12	1680	0.490991	0.850416	1.65244	0.162327	0.363637
13	1980	0.606264	0.701905	1.86397	0.176979	0.629288
14	2280	0.111806	0.689276	1.60353	0.187397	0.494896
15	2580	0.275261	0.748967	1.27755	0.272575	0.650346
16	2880	0.631272	0.766571	1.73468	0.450313	0.664882
17	3180	1.02597	0.702706	1.3628	0.326406	0.889762
18	3480	0.841487	0.660494	1.50022	0.0351448	0.964739
19	3780	0.923287	0.652182	1.22235	0.139971	0.855819
20	4080	0.718342	0.555064	1.39045	0.598006	0.949016
21	4380	1.33147	0.61104	1.9802	0.586673	0.829116

## Sheet: WT-0605-C6
		Raw Data
	Time_(sec)	Roi1	Roi2	Roi3	Roi4	Roi5	Ref_fluo	Background
1	0	1491764	1685590	1227587	1612719	1081389	826685101	33200550
2	30	1.42628e+06	1.58986e+06	1.19287e+06	1.59678e+06	1.04319e+06	8.03777e+08	3.26979e+07			Filter out due large abrupt change.
3	60	1.48574e+06	1.5842e+06	1.23694e+06	1.62511e+06	1.06296e+06	8.20279e+08	3.30819e+07
4	90	1.45797e+06	1.61599e+06	1.22294e+06	1.53566e+06	1.04951e+06	8.04523e+08	3.28499e+07
5	120	1.46242e+06	1.58741e+06	1.19269e+06	1.63163e+06	1.06036e+06	8.16387e+08	3.29821e+07
6	150	1.51157e+06	1.53404e+06	1.20766e+06	1.59326e+06	1.03647e+06	8.07894e+08	3.30054e+07
7	180	1.54874e+06	1.73916e+06	1.17055e+06	1.63401e+06	1.05635e+06	8.18176e+08	3.3202e+07
8	210	1.0608e+06	1.05437e+06	805976	975309	788985	8.01432e+08	3.30703e+07
9	240	1.09962e+06	1.09757e+06	819117	995776	856886	8.09243e+08	3.28498e+07
10	270	1.08994e+06	1.11778e+06	862334	989508	839075	8.01783e+08	3.28613e+07
11	300	1.13128e+06	1.09484e+06	898531	989560	829680	8.02975e+08	3.26041e+07
12	330	1.14872e+06	1.16211e+06	897575	997936	833417	7.98161e+08	3.25391e+07
13	360	1.13453e+06	1.17786e+06	917878	1.04673e+06	839955	8.15041e+08	3.32565e+07
14	390	1.07952e+06	1.27636e+06	912829	1.00058e+06	852572	8.07845e+08	3.32533e+07
15	690	1.15866e+06	1.14419e+06	913921	1.06025e+06	913300	8.1774e+08	3.28278e+07
16	990	1.25603e+06	1.19791e+06	894478	1.11264e+06	903615	8.04805e+08	3.23642e+07
17	1290	1.14531e+06	1.15403e+06	930295	1.06877e+06	921884	8.27822e+08	3.31261e+07
18	1590	1.27596e+06	1.19811e+06	994338	1.10896e+06	995235	8.14913e+08	3.26724e+07
19	1890	1.16079e+06	1.25283e+06	994470	1.15188e+06	943783	8.21823e+08	3.311e+07
20	2190	1.16053e+06	1.2317e+06	1.05179e+06	1.16184e+06	960751	8.25976e+08	3.32363e+07
21	2490	1.15321e+06	1.31316e+06	1.02981e+06	1.12463e+06	1.07766e+06	8.2538e+08	3.31013e+07
22	2790	1.12831e+06	1.41371e+06	1.03261e+06	1.07307e+06	1.08633e+06	8.19194e+08	3.32567e+07
23	3090	1.15664e+06	1.41738e+06	1.19583e+06	1.12874e+06	1.05082e+06	8.23454e+08	3.29546e+07
24	3390	1.10302e+06	1.42611e+06	1.27598e+06	1.15185e+06	997816	8.19197e+08	3.27668e+07
25	3690	1.15064e+06	1.35461e+06	1.24046e+06	1.22712e+06	955994	8.22879e+08	3.31141e+07
26	3990	1.13158e+06	1.3226e+06	1.41321e+06	1.27835e+06	1.0231e+06	8.25635e+08	3.32674e+07
27	4290	1.18938e+06	1.31049e+06	1.54082e+06	1.37154e+06	1.02679e+06	8.22302e+08	3.31946e+07
28	4590	1.19809e+06	1.2269e+06	1.58724e+06	1.44453e+06	1.03079e+06	8.34611e+08	3.35581e+07
		Background corrected Data
	Time_(sec)	Roi1-bkgd-corr	Roi2-bkgd-corr	Roi3-bkgd-corr	Roi4-bkgd-corr	Roi5-bkgd-corr	Ref_fluo-bkgd-corr
1	0	892689	1.08651e+06	628512	1.01364e+06	482314	2.97589e+08
2	30	836271	999855	602860	1.00678e+06	453180	2.82691e+08
3	60	888808	987269	640002	1.02817e+06	466031	2.93074e+08
4	90	865226	1.02324e+06	630191	942915	456764	2.81015e+08
5	120	867286	992277	597552	1.0365e+06	465222	2.90772e+08
6	150	916017	938487	612108	997707	440920	2.81909e+08
7	180	949641	1.14006e+06	571444	1.03491e+06	457252	2.89057e+08
8	210	464076	457649	209251	378585	192260	2.74412e+08
9	240	506872	504825	226370	403029	264139	2.85736e+08
10	270	496985	524823	269380	396554	246121	2.78094e+08
11	300	542970	506531	310217	401247	241367	2.83384e+08
12	330	561580	574970	310435	410796	246277	2.79607e+08
13	360	534447	577778	317792	446645	239869	2.85052e+08
14	390	479487	676335	312801	400551	252544	2.77908e+08
15	690	566308	551843	321571	467903	320950	2.94584e+08
16	990	672050	613927	310493	528655	319630	2.89037e+08
17	1290	547576	556297	332562	471035	324151	2.99912e+08
18	1590	686415	608560	404792	519418	405689	2.94234e+08
19	1890	563354	655391	397029	554437	346342	2.94171e+08
20	2190	560808	631982	452065	562115	361030	2.9631e+08
21	2490	555930	715873	432529	527346	480372	2.97865e+08
22	2790	528224	813619	432518	472977	486241	2.89204e+08
23	3090	562002	822737	601189	534102	456187	2.98276e+08
24	3390	511771	834860	684733	560603	406566	2.97012e+08
25	3690	553124	757096	642942	629608	358478	2.95161e+08
26	3990	531299	722314	812933	678069	422823	2.95474e+08
27	4290	590411	711520	941851	772573	427817	2.933e+08
28	4590	592563	621369	981710	839005	425258	2.99817e+08
		Bleaching Corrected Data
	Time_(sec)	Roi1-bkgd_bleach-corr	Roi2-bkgd_bleach-corr	Roi3-bkgd_bleach-corr	Roi4-bkgd_bleach-corr	Roi5-bkgd_bleach-corr
1	0	0.00299973	0.00365106	0.00211201	0.00340618	0.00162074
2	30	0.00295825	0.00353691	0.00213257	0.0035614	0.00160309
3	60	0.00303271	0.00336867	0.00218376	0.00350823	0.00159015
4	90	0.00307893	0.00364122	0.00224255	0.00335539	0.0016254
5	120	0.0029827	0.00341255	0.00205505	0.00356464	0.00159995
6	150	0.00324934	0.00332905	0.0021713	0.00353912	0.00156405
7	180	0.0032853	0.00394405	0.00197693	0.00358029	0.00158187
8	210	0.00169116	0.00166774	0.000762544	0.00137962	0.000700626
9	240	0.00177392	0.00176675	0.000792233	0.00141049	0.000924415
10	270	0.00178711	0.00188722	0.000968667	0.00142597	0.00088503
11	300	0.00191602	0.00178743	0.00109469	0.00141591	0.000851729
12	330	0.00200846	0.00205636	0.00111026	0.00146919	0.000880798
13	360	0.00187491	0.00202692	0.00111486	0.00156689	0.000841492
14	390	0.00172534	0.00243366	0.00112555	0.00144131	0.000908731
15	690	0.0019224	0.0018733	0.00109161	0.00158835	0.0010895
16	990	0.00232514	0.00212405	0.00107423	0.00182902	0.00110585
17	1290	0.00182579	0.00185487	0.00110887	0.00157058	0.00108082
18	1590	0.00233289	0.00206829	0.00137575	0.00176532	0.0013788
19	1890	0.00191506	0.00222793	0.00134966	0.00188475	0.00117735
20	2190	0.00189264	0.00213284	0.00152565	0.00189705	0.00121842
21	2490	0.00186638	0.00240334	0.0014521	0.00177042	0.00161271
22	2790	0.00182648	0.00281331	0.00149555	0.00163544	0.00168131
23	3090	0.00188416	0.0027583	0.00201554	0.00179063	0.00152941
24	3390	0.00172306	0.00281086	0.0023054	0.00188747	0.00136885
25	3690	0.00187397	0.00256503	0.00217827	0.0021331	0.00121452
26	3990	0.00179812	0.00244459	0.00275128	0.00229485	0.001431
27	4290	0.00201299	0.00242591	0.00321122	0.00263407	0.00145863
28	4590	0.00197642	0.0020725	0.00327437	0.00279839	0.00141839
		Normalized Data
	Time_(sec)	Roi1_corr_norm	Roi2_corr_norm	Roi3_corr_norm	Roi4_corr_norm	Roi5_corr_norm
1	0	1	1	1	1	1
2	30	0.98617	0.968737	1.00973	1.04557	0.989112
3	60	1.01099	0.922655	1.03397	1.02996	0.981127
4	90	1.0264	0.997306	1.06181	0.985086	1.00288
5	120	0.99432	0.934676	0.973031	1.04652	0.987177
6	150	1.08321	0.911804	1.02807	1.03903	0.965027
7	180	1.0952	1.08025	0.936039	1.05111	0.976021
8	210	0.563771	0.456784	0.361051	0.405034	0.432289
9	240	0.591357	0.483902	0.375108	0.414097	0.570367
10	270	0.595757	0.516896	0.458647	0.418642	0.546067
11	300	0.63873	0.489566	0.518315	0.415688	0.52552
12	330	0.669547	0.563222	0.525686	0.431331	0.543455
13	360	0.625025	0.555161	0.527864	0.460013	0.519204
14	390	0.575165	0.666564	0.53293	0.423144	0.56069
15	690	0.640857	0.513083	0.516858	0.466314	0.672227
16	990	0.775114	0.581762	0.508631	0.536972	0.682311
17	1290	0.60865	0.508036	0.525029	0.461096	0.666871
18	1590	0.777699	0.56649	0.651394	0.51827	0.850725
19	1890	0.638409	0.610214	0.639039	0.553331	0.72643
20	2190	0.630936	0.584171	0.722369	0.556943	0.751769
21	2490	0.622182	0.65826	0.687542	0.519766	0.99505
22	2790	0.608879	0.770546	0.708116	0.48014	1.03738
23	3090	0.62811	0.755482	0.954324	0.525699	0.943651
24	3390	0.574405	0.769875	1.09157	0.554131	0.844587
25	3690	0.624713	0.702544	1.03137	0.626243	0.749361
26	3990	0.599427	0.669557	1.30268	0.67373	0.882929
27	4290	0.671056	0.66444	1.52045	0.773319	0.899981
28	4590	0.658864	0.567643	1.55035	0.821562	0.875152
		Normalize the bouton fluorescent right after bleaching to 0
	Recovery Time_(sec)
1	0	0	0	0	0	0
2	30	0.0594192	0.0524678	0.0217926	0.0145444	0.249412
3	60	0.0688959	0.116306	0.151301	0.0218384	0.205518
4	90	0.161456	0.0634277	0.243804	0.0170973	0.168403
5	120	0.227834	0.205937	0.255231	0.0422011	0.2008
6	150	0.131937	0.19034	0.258608	0.0882277	0.156995
7	180	0.0245431	0.405883	0.266461	0.0290621	0.231932
8	480	0.166037	0.108928	0.241545	0.0983391	0.433402
9	780	0.455217	0.241809	0.228791	0.211728	0.451615
10	1080	0.0966658	0.0991623	0.254212	0.0899658	0.423726
11	1380	0.460785	0.21226	0.450115	0.181716	0.755821
12	1680	0.160765	0.296858	0.43096	0.23798	0.531307
13	1980	0.144669	0.246469	0.560145	0.243777	0.577079
14	2280	0.125813	0.389816	0.506154	0.184116	1.01652
15	2580	0.0971605	0.607068	0.53805	0.120527	1.09297
16	2880	0.138582	0.577921	0.919742	0.193637	0.923674
17	3180	0.0229062	0.60577	1.13251	0.239265	0.744735
18	3480	0.131265	0.475497	1.03919	0.354986	0.572728
19	3780	0.0768007	0.411675	1.4598	0.431191	0.813993
20	4080	0.231084	0.401775	1.79741	0.591007	0.844793
21	4380	0.204824	0.21449	1.84376	0.668426	0.799945

## Sheet: WT-0709-C1
		Raw Data
	Time_(sec)	Roi1	Roi2	Roi3	Roi4	Roi5	Ref_fluo	Background
1	0	1897797	1361134	1671100	1925240	1835362	1368089604	36200263
2	30	1.86406e+06	1.32861e+06	1.71826e+06	1.92634e+06	1.85869e+06	1.37651e+09	3.61854e+07			Filter out due to large abrupt change.
3	60	1.71918e+06	1.33999e+06	1.65989e+06	1.91604e+06	1.85206e+06	1.37967e+09	3.62508e+07
4	90	1.78704e+06	1.34332e+06	1.69035e+06	1.90063e+06	1.88331e+06	1.36378e+09	3.61221e+07
5	120	1.64102e+06	1.35075e+06	1.63917e+06	1.84065e+06	1.87092e+06	1.36422e+09	3.60952e+07
6	150	1.66398e+06	1.3243e+06	1.65376e+06	1.9046e+06	1.89345e+06	1.36918e+09	3.60515e+07
7	180	1.73655e+06	1.37048e+06	1.66269e+06	1.91258e+06	1.93965e+06	1.3654e+09	3.62343e+07
8	210	1.32061e+06	1.17378e+06	1.47377e+06	1.64994e+06	1.49936e+06	1.35957e+09	3.60454e+07
9	240	1.32061e+06	1.17378e+06	1.47377e+06	1.64994e+06	1.49936e+06	1.35957e+09	3.60454e+07
10	270	1.41715e+06	1.17744e+06	1.51997e+06	1.71524e+06	1.52142e+06	1.35716e+09	3.59952e+07
11	300	1.41715e+06	1.17744e+06	1.51997e+06	1.71524e+06	1.52142e+06	1.35716e+09	3.59952e+07
12	330	1.42609e+06	1.19625e+06	1.54168e+06	1.67543e+06	1.56171e+06	1.36295e+09	3.61185e+07
13	360	1.44902e+06	1.16434e+06	1.50067e+06	1.68939e+06	1.54669e+06	1.36957e+09	3.60245e+07
14	390	1.29745e+06	992103	1.2711e+06	1.5359e+06	1.35663e+06	1.15966e+09	3.12901e+07
15	690	1.48309e+06	1.16965e+06	1.5145e+06	1.76192e+06	1.65366e+06	1.36173e+09	3.60472e+07
16	990	1.06368e+06	1.00607e+06	1.3592e+06	1.56982e+06	1.58136e+06	1.17358e+09	3.12758e+07
17	1290	1.22916e+06	1.17679e+06	1.6081e+06	1.89563e+06	1.78432e+06	1.36324e+09	3.60665e+07
18	1590	1.02536e+06	1.00989e+06	1.51343e+06	1.63288e+06	1.5635e+06	1.1769e+09	3.13064e+07
19	1890	994936	1.00866e+06	1.48914e+06	1.57916e+06	1.60902e+06	1.17522e+09	3.12619e+07
20	2190	1.25234e+06	1.18924e+06	1.77011e+06	1.85031e+06	1.83222e+06	1.37846e+09	3.59863e+07
21	2490	952062	1.00535e+06	1.51125e+06	1.62689e+06	1.66428e+06	1.18402e+09	3.12844e+07
22	2790	1.20133e+06	1.18539e+06	1.76916e+06	1.82451e+06	1.8913e+06	1.37151e+09	3.59759e+07
23	3090	1.33148e+06	1.19544e+06	1.73237e+06	1.89607e+06	1.78973e+06	1.38029e+09	3.59942e+07
24	3390	1.31042e+06	1.19363e+06	1.79972e+06	1.9192e+06	1.81298e+06	1.38285e+09	3.61207e+07
25	3690	1.21953e+06	1.19568e+06	1.8124e+06	1.80721e+06	1.88969e+06	1.37949e+09	3.61443e+07
26	3990	1.0826e+06	951847	1.63133e+06	1668581	1.69733e+06	1.17779e+09	3.12542e+07
27	4290	1.20124e+06	1.10645e+06	1.8426e+06	1.76459e+06	1.90695e+06	1.36751e+09	3.60681e+07
28	4590	1.04299e+06	908774	1.62638e+06	1.46382e+06	1.67156e+06	1.17679e+09	3.12544e+07
		Background corrected Data
	Time_(sec)	Roi1-bkgd-corr	Roi2-bkgd-corr	Roi3-bkgd-corr	Roi4-bkgd-corr	Roi5-bkgd-corr	Ref_fluo-bkgd-corr
1	0	946946	410283	720249	974389	884511	3.95343e+08
2	30	913600	378146	767800	975882	908229	4.04159e+08
3	60	767001	387813	707714	963858	899882	4.05562e+08
4	90	838245	394520	741552	951833	934517	3.93136e+08
5	120	692925	402661	691084	892561	922832	3.94301e+08
6	150	717037	377361	706812	957652	946506	4.0043e+08
7	180	784809	418739	710949	960835	987904	3.91738e+08
8	210	373822	227000	526986	703158	552573	3.90981e+08
9	240	373822	227000	526986	703158	552573	3.90981e+08
10	270	471689	231973	574507	769777	575953	3.89922e+08
11	300	471689	231973	574507	769777	575953	3.89922e+08
12	330	477390	247548	592976	726724	613003	3.92398e+08
13	360	502787	218110	554436	743155	600460	4.01549e+08
14	390	475567	170224	449221	714023	534751	3.18855e+08
15	690	536260	222822	567664	815085	706832	3.93093e+08
16	990	242179	184563	537697	748314	759856	3.33156e+08
17	1290	281823	229455	660765	948297	836982	3.94085e+08
18	1590	203049	187582	691120	810569	741193	3.35662e+08
19	1890	173798	187525	668007	758021	787879	3.35177e+08
20	2190	307115	244014	824882	905079	886987	4.11466e+08
21	2490	130332	183620	689518	805160	842549	3.43366e+08
22	2790	256368	240427	824200	879552	946341	4.04793e+08
23	3090	386041	250001	786929	950629	844291	4.13079e+08
24	3390	361659	244867	850955	970439	864215	4.12239e+08
25	3690	270154	246300	863016	857825	940309	4.08253e+08
26	3990	261665	130912	810395	847646	876399	3.37955e+08
27	4290	253865	159073	895219	817206	959575	3.98312e+08
28	4590	222050	87833.7	805440	642877	850617	3.36948e+08
		Bleaching Corrected Data
	Time_(sec)	Roi1-bkgd_bleach-corr	Roi2-bkgd_bleach-corr	Roi3-bkgd_bleach-corr	Roi4-bkgd_bleach-corr	Roi5-bkgd_bleach-corr
1	0	0.00239525	0.00103779	0.00182183	0.00246466	0.00223732
2	30	0.0022605	0.000935637	0.00189975	0.0024146	0.00224721
3	60	0.00189121	0.000956237	0.00174502	0.0023766	0.00221885
4	90	0.0021322	0.00100352	0.00188625	0.00242113	0.00237709
5	120	0.00175735	0.0010212	0.00175268	0.00226365	0.00234042
6	150	0.00179067	0.00094239	0.00176513	0.00239156	0.00236373
7	180	0.0020034	0.00106893	0.00181486	0.00245275	0.00252184
8	210	0.000956113	0.000580591	0.00134786	0.00179844	0.0014133
9	240	0.000956113	0.000580591	0.00134786	0.00179844	0.0014133
10	270	0.0012097	0.00059492	0.00147339	0.00197418	0.0014771
11	300	0.0012097	0.00059492	0.00147339	0.00197418	0.0014771
12	330	0.0012166	0.000630858	0.00151116	0.00185201	0.0015622
13	360	0.00125212	0.000543171	0.00138074	0.00185072	0.00149536
14	390	0.00149149	0.000533861	0.00140886	0.00223934	0.0016771
15	690	0.00136421	0.000566843	0.0014441	0.00207352	0.00179813
16	990	0.000726924	0.000553982	0.00161395	0.00224613	0.00228078
17	1290	0.000715131	0.000582248	0.00167671	0.00240632	0.00212386
18	1590	0.000604922	0.000558843	0.00205898	0.00241484	0.00220815
19	1890	0.000518525	0.000559483	0.001993	0.00226156	0.00235064
20	2190	0.000746392	0.000593035	0.00200474	0.00219965	0.00215568
21	2490	0.000379571	0.000534765	0.00200811	0.0023449	0.00245379
22	2790	0.00063333	0.00059395	0.0020361	0.00217285	0.00233784
23	3090	0.000934545	0.000605212	0.00190503	0.00230132	0.00204389
24	3390	0.000877303	0.000593991	0.00206422	0.00235407	0.00209639
25	3690	0.00066173	0.000603301	0.00211392	0.00210121	0.00230325
26	3990	0.000774259	0.000387366	0.00239794	0.00250816	0.00259324
27	4290	0.000637352	0.000399367	0.00224753	0.00205167	0.0024091
28	4590	0.000659003	0.000260674	0.0023904	0.00190794	0.00252447
		Normalized Data
	Time_(sec)	Roi1_corr_norm	Roi2_corr_norm	Roi3_corr_norm	Roi4_corr_norm	Roi5_corr_norm
1	0	1	1	1	1	1
2	30	0.943742	0.901568	1.04277	0.979686	1.00442
3	60	0.789565	0.921418	0.95784	0.964269	0.991745
4	90	0.890181	0.96698	1.03536	0.982337	1.06247
5	120	0.733681	0.984017	0.962043	0.918442	1.04608
6	150	0.747593	0.908075	0.968879	0.970339	1.0565
7	180	0.836406	1.03	0.996172	0.995164	1.12717
8	210	0.399171	0.55945	0.739835	0.729691	0.631691
9	240	0.399171	0.55945	0.739835	0.729691	0.631691
10	270	0.505041	0.573258	0.80874	0.800994	0.660208
11	300	0.505041	0.573258	0.80874	0.800994	0.660208
12	330	0.50792	0.607887	0.829471	0.751423	0.698243
13	360	0.522752	0.523393	0.757888	0.750902	0.66837
14	390	0.622685	0.514422	0.77332	0.908577	0.749602
15	690	0.569547	0.546202	0.792662	0.841298	0.803697
16	990	0.303486	0.53381	0.885894	0.911334	1.01942
17	1290	0.298562	0.561047	0.920341	0.976329	0.949286
18	1590	0.252551	0.538495	1.13017	0.979784	0.986963
19	1890	0.216481	0.53911	1.09395	0.917592	1.05065
20	2190	0.311613	0.571441	1.1004	0.892473	0.963507
21	2490	0.158468	0.515293	1.10225	0.951409	1.09675
22	2790	0.264411	0.572323	1.11761	0.881599	1.04493
23	3090	0.390166	0.583175	1.04567	0.933726	0.913545
24	3390	0.366268	0.572363	1.13305	0.955127	0.937009
25	3690	0.276268	0.581334	1.16033	0.852533	1.02947
26	3990	0.323248	0.373261	1.31622	1.01765	1.15908
27	4290	0.26609	0.384825	1.23367	0.832436	1.07678
28	4590	0.275129	0.251182	1.31208	0.774118	1.12835
		Normalize the bouton fluorescent right after bleaching to 0
	Recovery Time_(sec)
1	0	0	0	0	0	0
2	30	0	-7.51096e-09	0	0	2.44197e-09
3	60	0.235494	0.0345694	0.270333	0.293185	0.0696366
4	90	0.235494	0.0345694	0.270333	0.293185	0.0696366
5	120	0.241899	0.121269	0.351669	0.0893555	0.162518
6	150	0.274889	-0.0902741	0.070825	0.087216	0.0895688
7	180	0.497176	-0.112736	0.131369	0.735551	0.287933
8	480	0.378979	-0.0331673	0.207255	0.458907	0.420032
9	780	-0.212838	-0.0641934	0.57303	0.746887	0.946827
10	1080	-0.223789	0.00399863	0.708178	1.01414	0.775555
11	1380	-0.326136	-0.0524651	1.53139	1.02834	0.867561
12	1680	-0.406368	-0.0509233	1.38931	0.77262	1.02308
13	1980	-0.194759	0.0300213	1.41459	0.669333	0.810282
14	2280	-0.535408	-0.110553	1.42186	0.911671	1.13567
15	2580	-0.299754	0.0322303	1.48213	0.624619	1.00911
16	2880	-0.0200296	0.0593981	1.19987	0.838961	0.688276
17	3180	-0.0731878	0.032329	1.5427	0.926956	0.745575
18	3480	-0.27338	0.054789	1.64972	0.505106	0.971355
19	3780	-0.168879	-0.466152	2.26134	1.18404	1.28787
20	4080	-0.296019	-0.437201	1.93745	0.422468	1.08689
21	4380	-0.275913	-0.771795	2.2451	0.182675	1.21281

## Sheet: WT-0709-C6
		Raw Data
	Time_(sec)	Roi1	Roi2	Roi3	Roi4	Roi5	Ref_fluo	Background
1	0	1767726	1594441	1117457	1199401	1497228	859254878	40202163
2	30	1.61366e+06	1.59473e+06	1.11935e+06	1.17358e+06	1.45094e+06	8.62595e+08	4.01272e+07			Filter out due to large abrupt change.
3	60	1.72744e+06	1.81885e+06	1.31326e+06	1.43894e+06	1.70333e+06	1.01288e+09	4.72051e+07
4	90	1.62797e+06	1.78661e+06	1.32547e+06	1.43071e+06	1.72114e+06	1.01799e+09	4.73678e+07
5	120	1.6263e+06	1.77536e+06	1.30844e+06	1.4253e+06	1.79004e+06	1.01616e+09	4.72303e+07
6	150	1.64094e+06	1.80668e+06	1.30555e+06	1.38063e+06	1.7746e+06	1.01436e+09	4.71417e+07
7	180	1.41088e+06	1.55886e+06	1.17946e+06	1.20563e+06	1.63256e+06	8.68714e+08	4.0228e+07
8	210	1.19098e+06	1.27985e+06	1.06715e+06	1.01664e+06	1.20741e+06	8.63885e+08	4.0194e+07
9	240	1.21319e+06	1.31914e+06	1.06883e+06	1.04538e+06	1.30654e+06	8.643e+08	4.02208e+07
10	270	1.19716e+06	1.34136e+06	1.07353e+06	1.02691e+06	1.43235e+06	8.63918e+08	4.0197e+07
11	300	1.21598e+06	1.36229e+06	1.0932e+06	1.03372e+06	1.40324e+06	8.66277e+08	4.02849e+07
12	330	1.18621e+06	1.36157e+06	1.11403e+06	1.04994e+06	1.33491e+06	8.64513e+08	4.02172e+07
13	360	1.36686e+06	1.57271e+06	1.30191e+06	1.2299e+06	1.57817e+06	1.01196e+09	4.70162e+07
14	390	1.36211e+06	1.60009e+06	1.30312e+06	1.23729e+06	1.54787e+06	1.01245e+09	4.70242e+07
15	690	1.26497e+06	1.44804e+06	1.14934e+06	1.06795e+06	1.3723e+06	8.69808e+08	4.01214e+07
16	990	1.2101e+06	1.38308e+06	1.1215e+06	1.0863e+06	1.5851e+06	8.72496e+08	4.06077e+07
17	1290	1.6286e+06	1.65261e+06	1.34194e+06	1.28636e+06	1.94137e+06	1.02985e+09	4.71322e+07
18	1590	1.58898e+06	1.57584e+06	1.41577e+06	1.32225e+06	1.72961e+06	1.0365e+09	4.72454e+07
19	1890	1.39056e+06	1.4233e+06	1.2314e+06	1.1153e+06	1.45405e+06	8.80106e+08	4.00615e+07
20	2190	1.66918e+06	1.55048e+06	1.43267e+06	1.29494e+06	1.73583e+06	1.03176e+09	4.69061e+07
21	2490	1.64479e+06	1.57723e+06	1.37186e+06	1.28143e+06	1.88913e+06	1.03167e+09	4.6928e+07
22	2790	1.60518e+06	1.61434e+06	1.41217e+06	1.30048e+06	1.94337e+06	1.03619e+09	4.71515e+07
23	3090	1.59499e+06	1.65223e+06	1.42962e+06	1.30422e+06	2.08893e+06	1.03966e+09	4.70466e+07
24	3390	1.62183e+06	1.76406e+06	1.39915e+06	1.33832e+06	1.90572e+06	1.03901e+09	4.68246e+07
25	3690	1.41688e+06	1.4056e+06	1.20066e+06	1.06189e+06	1.44393e+06	8.83027e+08	4.00629e+07
26	3990	1.76587e+06	1.68533e+06	1.427e+06	1.29583e+06	1.75952e+06	1.03543e+09	4.68856e+07
27	4290	1.88944e+06	1.68358e+06	1.38276e+06	1.2659e+06	1.817e+06	1.03724e+09	4.69702e+07
28	4590	1.94881e+06	1.71365e+06	1.44253e+06	1.34199e+06	2.04621e+06	1.04284e+09	4.70546e+07
		Background corrected Data
	Time_(sec)	Roi1-bkgd-corr	Roi2-bkgd-corr	Roi3-bkgd-corr	Roi4-bkgd-corr	Roi5-bkgd-corr	Ref_fluo-bkgd-corr
1	0	933440	760155	283171	365115	662942	1.72585e+08
2	30	780926	762001	286616	340851	618207	1.77206e+08
3	60	747824	839241	333651	459326	723715	2.06594e+08
4	90	644981	803618	342480	447726	738152	2.08933e+08
5	120	646160	795225	328307	445167	809906	2.09451e+08
6	150	662643	828385	327253	402336	796300	2.09157e+08
7	180	576054	724035	344637	370802	797738	1.81602e+08
8	210	356862	445733	233030	182525	373297	1.77355e+08
9	240	378522	484464	234161	210712	471866	1.77312e+08
10	270	362978	507177	239347	192726	598174	1.77336e+08
11	300	379975	526289	257192	197720	567237	1.78193e+08
12	330	351613	526970	279429	215342	500312	1.77586e+08
13	360	391161	597018	326220	254208	602474	2.08902e+08
14	390	386249	624233	327258	261430	572008	2.09259e+08
15	690	432357	615430	316731	235337	539690	1.84518e+08
16	990	367398	540375	278800	243597	742400	1.789e+08
17	1290	650503	674506	363838	308255	963272	2.2481e+08
18	1590	608531	595387	435321	341805	749158	2.29525e+08
19	1890	559192	591929	400038	283932	622684	1.95839e+08
20	2190	695770	577075	459266	321532	762417	2.3058e+08
21	2490	670924	603368	397994	307566	915272	2.30119e+08
22	2790	626681	635843	433670	321975	964875	2.30819e+08
23	3090	618664	675910	453293	327892	1.11261e+06	2.36086e+08
24	3390	650114	792347	427435	366603	934001	2.39226e+08
25	3690	585482	574201	369262	230494	612538	1.98735e+08
26	3990	792885	712346	454021	322847	786533	2.34606e+08
27	4290	914702	708841	408020	291158	842260	2.34969e+08
28	4590	972322	737164	466046	365496	1.06972e+06	2.39128e+08
		Bleaching Corrected Data
	Time_(sec)	Roi1-bkgd_bleach-corr	Roi2-bkgd_bleach-corr	Roi3-bkgd_bleach-corr	Roi4-bkgd_bleach-corr	Roi5-bkgd_bleach-corr
1	0	0.00540857	0.00440452	0.00164076	0.00211556	0.00384124
2	30	0.00440688	0.00430008	0.00161742	0.00192348	0.00348864
3	60	0.00361978	0.00406228	0.00161501	0.00222333	0.00350309
4	90	0.00308703	0.00384631	0.00163919	0.00214292	0.00353297
5	120	0.00308502	0.00379672	0.00156747	0.0021254	0.00386681
6	150	0.00316817	0.0039606	0.00156463	0.00192361	0.0038072
7	180	0.00317206	0.00398692	0.00189775	0.00204183	0.00439277
8	210	0.00201214	0.00251323	0.00131392	0.00102915	0.00210481
9	240	0.00213478	0.00273227	0.00132061	0.00118837	0.00266121
10	270	0.00204683	0.00285997	0.00134968	0.00108678	0.00337311
11	300	0.00213238	0.00295347	0.00144333	0.00110958	0.00318327
12	330	0.00197995	0.0029674	0.00157348	0.0012126	0.00281729
13	360	0.00187246	0.00285788	0.0015616	0.00121688	0.002884
14	390	0.0018458	0.00298306	0.00156389	0.00124931	0.00273349
15	690	0.00234317	0.00333534	0.00171653	0.00127542	0.00292487
16	990	0.00205365	0.00302055	0.00155841	0.00136164	0.00414981
17	1290	0.00289356	0.00300033	0.00161842	0.00137118	0.00428482
18	1590	0.00265127	0.002594	0.00189662	0.00148919	0.00326396
19	1890	0.00285536	0.00302252	0.00204268	0.00144982	0.00317957
20	2190	0.00301748	0.00250272	0.00199179	0.00139445	0.00330652
21	2490	0.00291556	0.00262198	0.00172952	0.00133655	0.00397739
22	2790	0.00271503	0.00275472	0.00187883	0.00139492	0.00418022
23	3090	0.00262051	0.00286299	0.00192004	0.00138887	0.00471274
24	3390	0.00271757	0.00331212	0.00178674	0.00153245	0.00390426
25	3690	0.00294604	0.00288928	0.00185806	0.00115981	0.00308218
26	3990	0.00337964	0.00303634	0.00193525	0.00137612	0.00335256
27	4290	0.00389286	0.00301674	0.00173648	0.00123913	0.00358455
28	4590	0.00406612	0.00308273	0.00194894	0.00152846	0.00447344
		Normalized Data
	Time_(sec)	Roi1_corr_norm	Roi2_corr_norm	Roi3_corr_norm	Roi4_corr_norm	Roi5_corr_norm
1	0	1	1	1	1	1
2	30	0.814796	0.976289	0.985773	0.909203	0.908205
3	60	0.669267	0.922299	0.984306	1.05094	0.911967
4	90	0.570766	0.873264	0.999044	1.01293	0.919746
5	120	0.570395	0.862005	0.955331	1.00465	1.00666
6	150	0.585768	0.899212	0.953602	0.909268	0.991136
7	180	0.586487	0.905189	1.15663	0.96515	1.14358
8	210	0.372028	0.570603	0.800802	0.486469	0.54795
9	240	0.394702	0.620333	0.804879	0.561725	0.6928
10	270	0.378442	0.649327	0.822593	0.513708	0.878129
11	300	0.394259	0.670555	0.879675	0.524486	0.828708
12	330	0.366077	0.673718	0.958996	0.573183	0.733432
13	360	0.346203	0.648853	0.951752	0.575202	0.7508
14	390	0.341272	0.677273	0.95315	0.590535	0.711616
15	690	0.433233	0.757254	1.04618	0.602873	0.761438
16	990	0.379703	0.685784	0.949812	0.64363	1.08033
17	1290	0.534996	0.681195	0.986387	0.64814	1.11548
18	1590	0.490198	0.588941	1.15594	0.703921	0.849714
19	1890	0.527932	0.686232	1.24496	0.685313	0.827744
20	2190	0.557907	0.568216	1.21394	0.65914	0.860795
21	2490	0.539062	0.595294	1.05409	0.631773	1.03544
22	2790	0.501987	0.625431	1.1451	0.659363	1.08825
23	3090	0.48451	0.650011	1.17021	0.656502	1.22688
24	3390	0.502456	0.751983	1.08897	0.724372	1.0164
25	3690	0.544699	0.65598	1.13244	0.548226	0.802392
26	3990	0.624867	0.68937	1.17948	0.650475	0.872781
27	4290	0.719757	0.684919	1.05834	0.585722	0.933175
28	4590	0.751792	0.699901	1.18783	0.722483	1.16458
		Normalize the bouton fluorescent right after bleaching to 0
	Recovery Time_(sec)
1	0	0	0	0	0	0
2	30	0.0723665	0.142432	0.0199718	0.152833	0.332919
3	60	0.0204716	0.225476	0.106742	0.055318	0.758874
4	90	0.0709502	0.286275	0.386341	0.0772075	0.645285
5	120	-0.018992	0.295334	0.774879	0.176102	0.426306
6	150	-0.082422	0.224117	0.739394	0.180202	0.466224
7	180	-0.0981588	0.305517	0.746241	0.211341	0.376166
8	480	0.195341	0.534591	1.20194	0.236397	0.490675
9	780	0.0244954	0.329894	0.729894	0.319168	1.22361
10	1080	0.520123	0.316748	0.909045	0.328327	1.30439
11	1380	0.377146	0.0525218	1.73957	0.441609	0.693564
12	1680	0.497579	0.331177	2.17562	0.403819	0.643069
13	1980	0.593245	-0.00683697	2.02368	0.350665	0.719033
14	2280	0.533099	0.0707198	1.2407	0.295088	1.12044
15	2580	0.414771	0.157033	1.68645	0.35112	1.2418
16	2880	0.358994	0.227435	1.80948	0.345309	1.56043
17	3180	0.416269	0.519494	1.41153	0.483142	1.07668
18	3480	0.55109	0.24453	1.62445	0.125418	0.584801
19	3780	0.806951	0.340164	1.85488	0.333068	0.74658
20	4080	1.1098	0.327413	1.26149	0.201566	0.885389
21	4380	1.21204	0.370324	1.89576	0.479305	1.41724

## Sheet: PP-0521-C2
		Raw Data
	Time_(sec)	Roi1	Roi2	Roi3	Roi4	Roi5	Ref_fluo	Background
1	0	1665525	1246078	1341907	1349944	1643594	747475430	17062945
2	30	1.62522e+06	1.25062e+06	1.3476e+06	1.33935e+06	1.65706e+06	7.4948e+08	1.70984e+07			Filter out due to bouton moved.
3	60	1.58663e+06	1.26474e+06	1.35816e+06	1.33016e+06	1.6644e+06	7.47342e+08	1.70687e+07
4	90	1.62311e+06	1.2571e+06	1.33678e+06	1.30446e+06	1.64304e+06	7.44883e+08	1.70714e+07
5	120	1.62495e+06	1.24058e+06	1.30795e+06	1.31316e+06	1656973	7.45566e+08	1.7104e+07
6	150	1.55966e+06	1.25392e+06	1.31673e+06	1.28964e+06	1.64239e+06	7.44208e+08	1.70125e+07
7	180	1.61564e+06	1.25472e+06	1.32204e+06	1.30797e+06	1.60079e+06	7.41958e+08	1.69852e+07
8	210	1.10547e+06	1.00148e+06	1.02873e+06	1.01198e+06	1.19634e+06	7.42127e+08	1.70322e+07
9	240	1.12374e+06	1.0373e+06	1.05586e+06	1.05939e+06	1.25054e+06	7.41641e+08	1.70918e+07
10	270	1.14907e+06	1.02697e+06	1.05278e+06	1.05131e+06	1.25592e+06	7.40939e+08	1.70495e+07
11	300	1.16891e+06	1.02992e+06	1.077e+06	1.03423e+06	1.25236e+06	7.39869e+08	1.70281e+07
12	330	1.18421e+06	1.03629e+06	1.09682e+06	1.06955e+06	1.22141e+06	7.39925e+08	1.70835e+07
13	360	1.15407e+06	1.032e+06	1.0835e+06	1.04982e+06	1.22537e+06	7.38001e+08	1.70434e+07
14	390	1.16056e+06	1.04576e+06	1.06847e+06	1.06399e+06	1.22293e+06	7.37645e+08	1.70044e+07
15	690	1.1459e+06	1.04621e+06	1.09652e+06	1.14225e+06	1.27544e+06	7.38948e+08	1.70258e+07
16	990	1.1472e+06	1.03582e+06	1.11037e+06	1.17548e+06	1.27153e+06	7.35341e+08	1.69901e+07
17	1290	1.12266e+06	1.04541e+06	1.11361e+06	1.17603e+06	1.26554e+06	7.32964e+08	1.69711e+07
18	1590	1.15859e+06	1.0928e+06	1.12722e+06	1.1987e+06	1.27017e+06	7.37903e+08	1.69695e+07
19	1890	1.14584e+06	1.08216e+06	1.1377e+06	1.18997e+06	1.30518e+06	7.35302e+08	1.71925e+07
20	2190	1.14584e+06	1.03682e+06	1.13859e+06	1.19665e+06	1.2732e+06	7.34406e+08	1.72317e+07
21	2490	1.15758e+06	1.03393e+06	1.14986e+06	1.2115e+06	1.26867e+06	7.37333e+08	1.73057e+07
22	2790	1.17315e+06	1.03873e+06	1.17816e+06	1.22617e+06	1.19809e+06	7.36593e+08	1.73077e+07
23	3090	1.1467e+06	1.05155e+06	1.19557e+06	1.15324e+06	1.25872e+06	7.37334e+08	1.72882e+07
24	3390	1.15937e+06	1.04711e+06	1.16585e+06	1.1761e+06	1.22519e+06	7.35663e+08	1.72563e+07
25	3690	1.16068e+06	1.04986e+06	1.20206e+06	1.19821e+06	1.13627e+06	7.35088e+08	1.71706e+07
26	3990	1.191e+06	1.0325e+06	1.2229e+06	1.20072e+06	1.26859e+06	7.39472e+08	1.72379e+07
27	4290	1.16129e+06	1.03604e+06	1.20696e+06	1.17932e+06	1.20001e+06	7.35955e+08	1.71424e+07
28	4590	1.17521e+06	1.06076e+06	1.27191e+06	1.195e+06	1.28682e+06	7.40221e+08	1.72176e+07
		Background corrected Data
	Time_(sec)	Roi1-bkgd-corr	Roi2-bkgd-corr	Roi3-bkgd-corr	Roi4-bkgd-corr	Roi5-bkgd-corr	Ref_fluo-bkgd-corr
1	0	749394	329947	425776	433813	727463	1.10077e+08
2	30	707186	332584	429567	421321	739029	1.10757e+08
3	60	670184	348295	441718	413720	747961	1.09728e+08
4	90	706530	340516	420193	387876	726460	1.07169e+08
5	120	706616	322248	389618	394826	738638	1.06634e+08
6	150	646237	340500	403309	376222	728967	1.08694e+08
7	180	703680	342761	410082	396006	688833	1.07462e+08
8	210	190991	87002.6	114251	97498.7	281861	1.05877e+08
9	240	206062	119621	138182	141705	332861	1.03164e+08
10	270	233659	111559	137365	135904	340512	1.04042e+08
11	300	254652	115656	162737	119972	338099	1.03773e+08
12	330	266971	119060	179589	152311	304175	1.01759e+08
13	360	238994	116922	168423	134741	310288	1.01334e+08
14	390	247572	132773	155482	151003	309943	1.02435e+08
15	690	231762	132073	182385	228115	361308	1.02939e+08
16	990	234979	123603	198146	263256	359310	1.00663e+08
17	1290	211464	134213	202416	264830	354341	9.89979e+07
18	1590	247479	181690	216108	287588	359060	1.03996e+08
19	1890	222748	159069	214608	266878	382091	9.30627e+07
20	2190	220653	111632	213397	271463	348009	9.07046e+07
21	2490	228413	104762	220699	282338	339502	9.08659e+07
22	2790	243878	109460	248883	296900	268811	9.00507e+07
23	3090	218473	123327	267341	225008	330493	9.15193e+07
24	3390	232855	120591	239337	249590	298676	9.10404e+07
25	3690	238772	127948	280146	276297	214358	9.36693e+07
26	3990	265475	106973	297371	275195	343065	9.55379e+07
27	4290	240893	115640	286561	258925	279616	9.55881e+07
28	4590	250777	136327	347468	270563	362387	9.70431e+07
		Bleaching Corrected Data
	Time_(sec)	Roi1-bkgd_bleach-corr	Roi2-bkgd_bleach-corr	Roi3-bkgd_bleach-corr	Roi4-bkgd_bleach-corr	Roi5-bkgd_bleach-corr
1	0	0.0068079	0.00299741	0.00386798	0.00394099	0.00660867
2	30	0.006385	0.00300281	0.00387845	0.00380399	0.00667249
3	60	0.00610769	0.00317417	0.00402557	0.00377042	0.00681651
4	90	0.00659268	0.00317738	0.00392086	0.00361929	0.00677865
5	120	0.00662654	0.00302199	0.00365378	0.00370262	0.00692684
6	150	0.00594549	0.00313266	0.00371051	0.0034613	0.00670662
7	180	0.00654815	0.0031896	0.00381606	0.00368507	0.00640999
8	210	0.0018039	0.000821733	0.00107909	0.000920867	0.00266215
9	240	0.00199741	0.00115952	0.00133944	0.00137358	0.00322651
10	270	0.00224581	0.00107224	0.00132028	0.00130623	0.00327282
11	300	0.00245394	0.00111451	0.0015682	0.0011561	0.00325807
12	330	0.00262357	0.00117003	0.00176485	0.00149678	0.00298918
13	360	0.00235847	0.00115382	0.00166205	0.00132967	0.00306203
14	390	0.00241687	0.00129617	0.00151786	0.00147414	0.00302576
15	690	0.00225144	0.00128301	0.00177177	0.00221601	0.00350991
16	990	0.00233431	0.00122788	0.0019684	0.00261521	0.00356943
17	1290	0.00213605	0.00135572	0.00204465	0.00267511	0.00357928
18	1590	0.00237969	0.00174708	0.00207803	0.00276537	0.00345262
19	1890	0.00239353	0.00170926	0.00230606	0.00286773	0.00410574
20	2190	0.00243266	0.00123072	0.00235266	0.00299283	0.00383673
21	2490	0.00251374	0.00115293	0.00242884	0.0031072	0.0037363
22	2790	0.00270823	0.00121554	0.00276382	0.00329704	0.00298511
23	3090	0.00238718	0.00134755	0.00292114	0.00245859	0.00361118
24	3390	0.00255771	0.00132459	0.0026289	0.00274153	0.0032807
25	3690	0.0025491	0.00136596	0.0029908	0.0029497	0.00228846
26	3990	0.00277874	0.00111969	0.0031126	0.00288047	0.00359087
27	4290	0.00252011	0.00120978	0.00299788	0.00270875	0.00292522
28	4590	0.00258418	0.00140481	0.00358055	0.00278807	0.00373429
		Normalized Data
	Time_(sec)	Roi1_corr_norm	Roi2_corr_norm	Roi3_corr_norm	Roi4_corr_norm	Roi5_corr_norm
1	0	1	1	1	1	1
2	30	0.937881	1.0018	1.00271	0.965238	1.00966
3	60	0.897147	1.05897	1.04074	0.956719	1.03145
4	90	0.968387	1.06004	1.01367	0.918372	1.02572
5	120	0.97336	1.0082	0.944624	0.939515	1.04814
6	150	0.873322	1.04512	0.95929	0.878283	1.01482
7	180	0.961846	1.06412	0.986576	0.935061	0.969937
8	210	0.264971	0.274147	0.278982	0.233664	0.402827
9	240	0.293396	0.38684	0.346289	0.348537	0.488224
10	270	0.329883	0.357723	0.341335	0.331448	0.495231
11	300	0.360455	0.371823	0.405431	0.293353	0.493
12	330	0.385371	0.390345	0.456272	0.379798	0.452312
13	360	0.346432	0.38494	0.429696	0.337395	0.463335
14	390	0.35501	0.432431	0.392417	0.374053	0.457847
15	690	0.330709	0.42804	0.45806	0.562297	0.531107
16	990	0.342882	0.409648	0.508897	0.663593	0.540113
17	1290	0.31376	0.452296	0.52861	0.678792	0.541604
18	1590	0.349548	0.582863	0.53724	0.701693	0.522439
19	1890	0.351582	0.570246	0.596192	0.727666	0.621266
20	2190	0.357329	0.410594	0.608241	0.75941	0.58056
21	2490	0.369239	0.384641	0.627935	0.788431	0.565364
22	2790	0.397808	0.405529	0.714538	0.836601	0.451697
23	3090	0.350649	0.44957	0.755212	0.62385	0.546432
24	3390	0.375697	0.44191	0.679659	0.695645	0.496424
25	3690	0.374432	0.455711	0.773221	0.748468	0.346282
26	3990	0.408165	0.373553	0.80471	0.730901	0.543358
27	4290	0.370175	0.403607	0.77505	0.687328	0.442634
28	4590	0.379585	0.468674	0.925691	0.707455	0.56506
		Normalize the bouton fluorescent right after bleaching to 0
	Recovery Time_(sec)
1	0	0	0	0	0	0
2	30	0.041826	0.148301	0.0943295	0.1622	0.139668
3	60	0.0955158	0.109984	0.0873871	0.138071	0.15113
4	90	0.140501	0.12854	0.177216	0.0842809	0.14748
5	120	0.177165	0.152914	0.248468	0.20634	0.0809341
6	150	0.119867	0.145801	0.211222	0.146467	0.0989631
7	180	0.132489	0.208298	0.158976	0.198227	0.0899868
8	480	0.0967315	0.20252	0.250974	0.464027	0.209805
9	780	0.114644	0.178316	0.32222	0.607056	0.224535
10	1080	0.0717907	0.234441	0.349847	0.628517	0.226975
11	1380	0.124452	0.406265	0.361942	0.660853	0.195629
12	1680	0.127445	0.389661	0.444562	0.697527	0.357264
13	1980	0.135902	0.179562	0.461449	0.742349	0.290688
14	2280	0.153427	0.145408	0.48905	0.783326	0.265835
15	2580	0.195465	0.172897	0.61042	0.851341	0.0799279
16	2880	0.126072	0.230854	0.667424	0.550939	0.23487
17	3180	0.162929	0.220772	0.561539	0.652313	0.15308
18	3480	0.161069	0.238935	0.692663	0.726898	-0.0924826
19	3780	0.210705	0.130817	0.736795	0.702094	0.229843
20	4080	0.154804	0.170367	0.695227	0.640569	0.0651049
21	4380	0.168651	0.255993	0.906346	0.668988	0.265337

## Sheet: PP-0522-C2
		Raw Data
	Time_(sec)	Roi1	Roi2	Roi3	Roi4	Roi5	Ref_fluo	Background
1	0	1186595	1253993	1338280	1295518	1743694	975832828	36570608
2	30	1.1987e+06	1.25181e+06	1.28523e+06	1.28759e+06	1.71951e+06	9.74594e+08	3.66436e+07			Filter out due to large abrupt change.
3	60	1.20517e+06	1.28618e+06	1.24518e+06	1.32185e+06	1.67338e+06	9.71164e+08	3.64917e+07
4	90	1.1952e+06	1.28034e+06	1.22167e+06	1.30321e+06	1.67093e+06	9.72466e+08	3.65635e+07
5	120	1.17989e+06	1.28262e+06	1.25811e+06	1.26797e+06	1.66475e+06	9.71907e+08	3.65953e+07
6	150	885768	886461	892467	881107	923868	7.80861e+08	3.31043e+07
7	180	1.18066e+06	1.26551e+06	1.2541e+06	1.25008e+06	1.75773e+06	9.76096e+08	3.65538e+07
8	210	1.02811e+06	1.03609e+06	1.06294e+06	1.15854e+06	1.3356e+06	9.71269e+08	3.65201e+07
9	240	1.05193e+06	1.0501e+06	1.11803e+06	1.18975e+06	1.38488e+06	9.70976e+08	3.64737e+07
10	270	1.06545e+06	1.07213e+06	1.12501e+06	1.23769e+06	1.35455e+06	9.72739e+08	3.66153e+07
11	300	1.03974e+06	1.05549e+06	1.14291e+06	1.19078e+06	1.34082e+06	9.72626e+08	3.66036e+07
12	330	1.05515e+06	1.06165e+06	1.21482e+06	1.27052e+06	1.44052e+06	9.69098e+08	3.65633e+07
13	360	1.0547e+06	1.08656e+06	1.14124e+06	1.23782e+06	1.35948e+06	9.67948e+08	3.65211e+07
14	390	1.03953e+06	1.0882e+06	1.14838e+06	1.22381e+06	1.3123e+06	9.68807e+08	3.65143e+07
15	690	1.09172e+06	1.11751e+06	1.15977e+06	1.21792e+06	1.33981e+06	9.68283e+08	3.64356e+07
16	990	1.0871e+06	1.17689e+06	1.22175e+06	1.18782e+06	1.5103e+06	9.69558e+08	3.64914e+07
17	1290	1.07219e+06	1.18002e+06	1.16701e+06	1.17054e+06	1.44268e+06	9.68106e+08	3.63689e+07
18	1590	1.08958e+06	1.22297e+06	1.21756e+06	1.19144e+06	1.52357e+06	9.69414e+08	3.63342e+07
19	1890	1.08256e+06	1.17953e+06	1.21678e+06	1.20119e+06	1.54192e+06	9.70592e+08	3.63833e+07
20	2190	1.09748e+06	1.18764e+06	1.24166e+06	1.23756e+06	1.55566e+06	9.68055e+08	3.62807e+07
21	2490	1.10656e+06	1.16009e+06	1.31751e+06	1.22773e+06	1.60917e+06	9.69976e+08	3.63243e+07
22	2790	1.09131e+06	1.14956e+06	1.25661e+06	1.23089e+06	1.47499e+06	9.65648e+08	3.62568e+07
23	3090	1.07174e+06	1.15405e+06	1.23411e+06	1.22123e+06	1.56725e+06	9.65857e+08	3.62302e+07
24	3390	1.08534e+06	1.18828e+06	1.38264e+06	1.21287e+06	1.57342e+06	9.63633e+08	3.6249e+07
25	3690	1.12058e+06	1.1489e+06	1.19112e+06	1.21553e+06	1.56918e+06	9.63207e+08	3.61624e+07
26	3990	1.09986e+06	1.15081e+06	1.11675e+06	1.22678e+06	1.56091e+06	9.58843e+08	3.60692e+07
27	4290	1.09143e+06	1.13917e+06	1.20329e+06	1.30859e+06	1.46877e+06	9.60644e+08	3.61689e+07
28	4590	1.11682e+06	1.09459e+06	1.15823e+06	1.26138e+06	1.48513e+06	9.59256e+08	3.6032e+07
		Background corrected Data
	Time_(sec)	Roi1-bkgd-corr	Roi2-bkgd-corr	Roi3-bkgd-corr	Roi4-bkgd-corr	Roi5-bkgd-corr	Ref_fluo-bkgd-corr
1	0	249316	316714	401001	358239	806415	1.32893e+08
2	30	259554	312661	346082	348439	780360	1.29971e+08
3	60	269917	350924	309921	386596	738126	1.30044e+08
4	90	258107	343244	284575	366114	733830	1.2969e+08
5	120	241978	344709	320193	330059	726841	1.28397e+08
6	150	37327.6	38021	44027.1	32667.2	75428	1.78178e+07
7	180	243810	328660	317250	313234	820881	1.33544e+08
8	210	92122.2	100107	126958	222555	399616	1.29492e+08
9	240	117137	115309	183239	254954	450081	1.30271e+08
10	270	127025	133711	186589	299263	416131	1.2877e+08
11	300	101621	117361	204784	252654	402694	1.28925e+08
12	330	118055	124555	277725	333429	503428	1.26327e+08
13	360	118689	150544	205226	301805	423473	1.26149e+08
14	390	103696	152361	212540	287975	376462	1.27164e+08
15	690	157905	183691	225954	284097	405994	1.28454e+08
16	990	151856	241641	286505	252571	575047	1.28444e+08
17	1290	140083	247906	234901	238431	510569	1.29815e+08
18	1590	158361	291750	286337	260223	592354	1.31923e+08
19	1890	150085	247056	284300	268709	609439	1.3197e+08
20	2190	167632	257788	311811	307711	625807	1.31797e+08
21	2490	175591	229120	386539	296764	678204	1.32714e+08
22	2790	162070	220322	327375	301651	545757	1.29941e+08
23	3090	143183	225500	305557	292681	638698	1.30763e+08
24	3390	156307	259250	453600	283832	644387	1.28107e+08
25	3690	193760	222080	264307	288712	642366	1.29676e+08
26	3990	175432	226382	192319	302347	636485	1.2746e+08
27	4290	164450	212182	276310	381604	541782	1.26964e+08
28	4590	193347	171119	234758	337903	561651	1.2873e+08
		Bleaching Corrected Data
	Time_(sec)	Roi1-bkgd_bleach-corr	Roi2-bkgd_bleach-corr	Roi3-bkgd_bleach-corr	Roi4-bkgd_bleach-corr	Roi5-bkgd_bleach-corr
1	0	0.00187607	0.00238323	0.00301748	0.0026957	0.00606816
2	30	0.00199701	0.00240562	0.00266276	0.00268089	0.0060041
3	60	0.00207557	0.00269849	0.00238319	0.0029728	0.00567595
4	90	0.00199018	0.00264665	0.00219427	0.00282299	0.00565833
5	120	0.00188461	0.00268471	0.00249378	0.00257061	0.00566089
6	150	0.00209496	0.00213388	0.00247097	0.0018334	0.0042333
7	180	0.00182569	0.00246107	0.00237563	0.00234556	0.00614691
8	210	0.000711411	0.000773075	0.000980429	0.00171868	0.00308603
9	240	0.000899175	0.000885142	0.0014066	0.0019571	0.00345496
10	270	0.000986451	0.00103837	0.00144901	0.00232402	0.00323158
11	300	0.000788212	0.000910303	0.00158839	0.00195969	0.00312347
12	330	0.000934524	0.000985975	0.00219847	0.00263942	0.00398513
13	360	0.000940865	0.00119339	0.00162686	0.00239246	0.00335694
14	390	0.000815448	0.00119815	0.00167138	0.0022646	0.00296044
15	690	0.00122927	0.00143001	0.00175902	0.00221165	0.0031606
16	990	0.00118227	0.00188129	0.00223059	0.00196639	0.00447703
17	1290	0.0010791	0.00190969	0.00180951	0.00183671	0.00393307
18	1590	0.00120041	0.00221152	0.00217048	0.00197253	0.00449015
19	1890	0.00113726	0.00187206	0.00215428	0.00203614	0.00461801
20	2190	0.00127189	0.00195595	0.00236584	0.00233474	0.00474826
21	2490	0.00132308	0.00172642	0.00291258	0.00223612	0.00511028
22	2790	0.00124726	0.00169556	0.00251942	0.00232145	0.00420004
23	3090	0.00109498	0.00172449	0.00233672	0.00223825	0.00488438
24	3390	0.00122013	0.0020237	0.00354079	0.00221559	0.00503007
25	3690	0.00149418	0.00171258	0.00203821	0.0022264	0.00495361
26	3990	0.00137637	0.00177611	0.00150886	0.0023721	0.00499362
27	4290	0.00129525	0.00167121	0.00217629	0.00300561	0.00426722
28	4590	0.00150195	0.00132928	0.00182364	0.00262489	0.004363
		Normalized Data
	Time_(sec)	Roi1_corr_norm	Roi2_corr_norm	Roi3_corr_norm	Roi4_corr_norm	Roi5_corr_norm
1	0	1	1	1	1	1
2	30	1.06447	1.00939	0.882445	0.994508	0.989443
3	60	1.10634	1.13228	0.789797	1.10279	0.935366
4	90	1.06083	1.11053	0.727188	1.04722	0.932463
5	120	1.00455	1.1265	0.826444	0.953597	0.932884
6	150	1.11668	0.895373	0.818885	0.680121	0.697625
7	180	0.973149	1.03266	0.787288	0.870111	1.01298
8	210	0.379203	0.324381	0.324917	0.637563	0.50856
9	240	0.479287	0.371405	0.466151	0.726008	0.569358
10	270	0.525807	0.435698	0.480206	0.86212	0.532547
11	300	0.42014	0.381962	0.526396	0.726969	0.51473
12	330	0.498129	0.413714	0.728579	0.979121	0.656727
13	360	0.501509	0.500745	0.539145	0.887509	0.553206
14	390	0.434658	0.502742	0.553901	0.840078	0.487865
15	690	0.655237	0.600029	0.582943	0.820437	0.520851
16	990	0.630186	0.789388	0.739222	0.729456	0.737791
17	1290	0.575191	0.801303	0.599677	0.681346	0.648148
18	1590	0.639852	0.92795	0.719304	0.731734	0.739953
19	1890	0.606195	0.785515	0.713933	0.755328	0.761023
20	2190	0.677956	0.820712	0.784045	0.866096	0.782488
21	2490	0.705242	0.724406	0.965237	0.829515	0.842147
22	2790	0.664826	0.711453	0.834942	0.861168	0.692145
23	3090	0.583655	0.723595	0.774395	0.830303	0.80492
24	3390	0.650367	0.849142	1.17343	0.821897	0.828929
25	3690	0.796442	0.718594	0.675467	0.825909	0.816328
26	3990	0.733646	0.745253	0.500041	0.879958	0.822922
27	4290	0.690407	0.701236	0.721228	1.11497	0.703215
28	4590	0.800586	0.557766	0.60436	0.973733	0.719
		Normalize the bouton fluorescent right after bleaching to 0
	Recovery Time_(sec)
1	0	0	0	0	0	0
2	30	0.149967	0.0653609	0.277892	0.283295	0.144715
3	60	0.219675	0.154727	0.305547	0.71927	0.0570962
4	90	0.0613409	0.0800351	0.396432	0.286372	0.0146865
5	120	0.178201	0.12417	0.794246	1.09403	0.352679
6	150	0.183265	0.24514	0.421515	0.800591	0.106268
7	180	0.083094	0.247916	0.45055	0.648669	-0.0492598
8	480	0.413615	0.383142	0.507693	0.585758	0.0292544
9	780	0.376078	0.646346	0.815188	0.294338	0.545631
10	1080	0.293671	0.662908	0.54062	0.14024	0.332257
11	1380	0.390561	0.838943	0.775998	0.301633	0.550778
12	1680	0.340129	0.640962	0.765429	0.377207	0.600931
13	1980	0.447656	0.689885	0.903382	0.732005	0.652023
14	2280	0.488542	0.556022	1.2599	0.614835	0.794027
15	2580	0.427982	0.538018	1.00353	0.716219	0.436981
16	2880	0.306354	0.554895	0.884393	0.617357	0.705417
17	3180	0.406317	0.729402	1.66953	0.590432	0.762564
18	3480	0.625199	0.547944	0.689744	0.603283	0.732573
19	3780	0.531104	0.585	0.344574	0.776406	0.748268
20	4080	0.466313	0.523817	0.779783	1.52915	0.463332
21	4380	0.631407	0.324398	0.549833	1.07677	0.500903

[truncated: 6 more sheets: PP-0523-C3, PP-0605-C1, PP-0605-C4, PP-0709-C2, PP-0709-C4, PP-0709-C7]
