# Supplementary material for: A proline-rich motif on VGLUT1 reduces synaptic vesicle super-pool and spontaneous release frequency
Source: eLife journal article supplement (doi:10.7554/elife.50401), 2019-10-30
Supplement: supp [file elife-50401-supp-v1.zip › elife_poa_e50401_Figure_4_source_data_5.xlsx]

## Sheet: WT-1127-C3
		Raw Data
	Time_(sec)	Roi1	Roi2	Roi3	Roi4	Roi5	Ref_fluo	Background
1	0	2408848	2066473	2101689	2432281	2057453	621536661	45803857
2	30	2.41558e+06	2.09854e+06	2.17751e+06	2.46978e+06	2.09935e+06	6.26145e+08	4.58114e+07			Filter out due to large abrupt change.
3	60	2.39995e+06	2.18877e+06	2.01835e+06	2.55451e+06	2.08884e+06	6.23126e+08	4.57234e+07
4	90	2.33667e+06	2.11904e+06	2.01374e+06	2.53944e+06	2.0912e+06	6.1912e+08	4.55561e+07
5	120	2.38764e+06	2.16221e+06	2.06618e+06	2.61012e+06	2.08311e+06	6.21121e+08	4.56936e+07
6	150	2.40236e+06	2.1261e+06	2.09251e+06	2.55649e+06	2.08002e+06	6.22548e+08	4.59056e+07
7	180	2.33791e+06	2.10261e+06	1.94719e+06	2.55822e+06	2.11346e+06	6.19858e+08	4.58529e+07
8	210	1.84256e+06	1.68105e+06	1.75105e+06	1.80426e+06	1.64631e+06	6.18136e+08	4.57149e+07
9	240	1.88489e+06	1.77885e+06	1.82205e+06	1.92472e+06	1.72722e+06	6.20906e+08	4.58875e+07
10	270	1.92863e+06	1.92184e+06	1.89576e+06	1.96223e+06	1.66877e+06	6.19924e+08	4.57893e+07
11	300	2.02118e+06	1.8289e+06	1.87739e+06	1.86515e+06	1.75613e+06	6.21647e+08	4.57791e+07
12	330	2.01895e+06	1.79342e+06	1.83825e+06	2.12455e+06	1.7154e+06	6.17309e+08	4.57304e+07
13	360	2.04703e+06	1.79995e+06	1.88521e+06	2.11686e+06	1.72629e+06	6.18832e+08	4.57558e+07
14	390	2.03909e+06	1.80798e+06	1.93567e+06	2.07339e+06	1.73302e+06	6.14878e+08	4.56375e+07
15	690	2.10448e+06	1.86357e+06	1.95133e+06	2.16612e+06	1.73971e+06	6.19881e+08	4.57179e+07
16	990	2.03881e+06	1.85716e+06	2.01694e+06	2.77598e+06	1.745e+06	6.22996e+08	4.57207e+07
17	1290	2.1969e+06	1.93043e+06	1.97316e+06	2.35118e+06	1.786e+06	6.24008e+08	4.58948e+07
18	1590	2.13338e+06	1.8782e+06	2.01674e+06	2.30073e+06	1.8656e+06	6.18771e+08	4.57141e+07
19	1890	2.06273e+06	1.92984e+06	2.16615e+06	2.23873e+06	1.88627e+06	6.19096e+08	4.60065e+07
20	2190	2.10495e+06	1.87504e+06	2.20888e+06	2.27153e+06	1.89661e+06	6.21253e+08	4.60505e+07
21	2490	2.10927e+06	1.96523e+06	2.14579e+06	2.48449e+06	1.92369e+06	6.20611e+08	4.60163e+07
22	2790	2.08687e+06	1.88148e+06	2.17836e+06	2.30739e+06	1.90554e+06	6.22432e+08	4.61253e+07
23	3090	2.06263e+06	1.88112e+06	2.1518e+06	2.41381e+06	1.98229e+06	6.18244e+08	4.59245e+07
24	3390	2.23913e+06	1.96454e+06	2.07848e+06	2.30532e+06	1.94932e+06	6.14284e+08	4.58255e+07
25	3690	2.11559e+06	1.83991e+06	2.07447e+06	2.30583e+06	1.97888e+06	6.15108e+08	4.57292e+07
26	3990	2.26839e+06	1.99062e+06	2.12896e+06	2.24053e+06	1.99816e+06	6.17043e+08	4.59254e+07
27	4290	2.20577e+06	1.86747e+06	2.2053e+06	2.13979e+06	2.00338e+06	6.19599e+08	4.59908e+07
28	4590	2.22462e+06	1.84472e+06	2.0709e+06	2.07402e+06	1.9448e+06	6.14044e+08	4.5798e+07
		Background corrected Data
	Time_(sec)	Roi1-bkgd-corr	Roi2-bkgd-corr	Roi3-bkgd-corr	Roi4-bkgd-corr	Roi5-bkgd-corr	Ref_fluo-bkgd-corr
1	0	1.04418e+06	701805	737021	1.06761e+06	692785	1.42608e+08
2	30	1.05069e+06	733648	812620	1.10489e+06	734459	1.47138e+08
3	60	1.03768e+06	826499	656080	1.19224e+06	726571	1.45039e+08
4	90	979381	761751	656455	1.18216e+06	733913	1.42782e+08
5	120	1.02625e+06	800830	704796	1.24874e+06	721728	1.43346e+08
6	150	1.03467e+06	758404	724810	1.18879e+06	712325	1.42556e+08
7	180	971778	736478	581066	1.19209e+06	747335	1.40417e+08
8	210	480537	319034	389028	442244	284295	1.40137e+08
9	240	517729	411691	454891	557565	360057	1.41103e+08
10	270	564396	557604	531528	597991	304532	1.41147e+08
11	300	657250	464973	513458	501220	392195	1.42977e+08
12	330	656473	430945	475768	762070	352920	1.39148e+08
13	360	683795	436712	521969	753625	363053	1.40406e+08
14	390	679382	448266	575956	713679	373311	1.37689e+08
15	690	742374	501466	589219	804011	377599	1.41851e+08
16	990	676622	494972	654750	1.41379e+06	382812	1.44937e+08
17	1290	829522	563052	605786	983807	418625	1.44129e+08
18	1590	771381	516201	654741	938739	503604	1.40781e+08
19	1890	692024	559135	795442	868023	515560	1.38048e+08
20	2190	732929	503020	836862	899516	524598	1.39746e+08
21	2490	738272	594231	774796	1.1135e+06	552687	1.39461e+08
22	2790	712626	507235	804112	933144	531294	1.40142e+08
23	3090	694373	512863	783537	1.04555e+06	614030	1.38055e+08
24	3390	873814	599233	713170	940011	584012	1.35129e+08
25	3690	753145	477469	712030	943382	616435	1.36959e+08
26	3990	900098	622332	760669	872242	629874	1.36843e+08
27	4290	835535	497230	835066	769552	633145	1.38716e+08
28	4590	860121	480223	706402	709523	580310	1.35176e+08
		Bleaching Corrected Data
	Time_(sec)	Roi1-bkgd_bleach-corr	Roi2-bkgd_bleach-corr	Roi3-bkgd_bleach-corr	Roi4-bkgd_bleach-corr	Roi5-bkgd_bleach-corr
1	0	0.00732202	0.00492121	0.00516815	0.00748634	0.00485796
2	30	0.00714086	0.00498612	0.00552284	0.00750922	0.00499163
3	60	0.00715453	0.00569848	0.00452349	0.00822013	0.0050095
4	90	0.00685926	0.00533505	0.00459759	0.00827943	0.00514008
5	120	0.0071593	0.00558671	0.00491676	0.00871139	0.00503488
6	150	0.00725795	0.00532003	0.00508438	0.00833908	0.0049968
7	180	0.00692067	0.00524495	0.00413816	0.00848969	0.00532226
8	210	0.00342904	0.00227658	0.00277604	0.00315579	0.00202868
9	240	0.00366916	0.00291766	0.00322382	0.00395147	0.00255173
10	270	0.00399864	0.00395052	0.00376578	0.00423666	0.00215756
11	300	0.0045969	0.00325208	0.00359119	0.0035056	0.00274306
12	330	0.00471779	0.00309701	0.00341914	0.00547667	0.00253628
13	360	0.00487013	0.00311035	0.00371757	0.00536747	0.00258574
14	390	0.0049342	0.00325565	0.00418304	0.00518329	0.00271127
15	690	0.00523346	0.00353515	0.00415377	0.00566798	0.00266193
16	990	0.0046684	0.00341509	0.00451749	0.00975455	0.00264124
17	1290	0.00575542	0.00390659	0.00420309	0.00682589	0.00290452
18	1590	0.00547931	0.00366671	0.00465079	0.0066681	0.00357722
19	1890	0.00501291	0.00405029	0.00576206	0.00628782	0.00373464
20	2190	0.00524473	0.00359953	0.00598845	0.0064368	0.00375394
21	2490	0.00529374	0.0042609	0.00555563	0.00798427	0.00396302
22	2790	0.00508501	0.00361942	0.00573782	0.00665854	0.0037911
23	3090	0.00502969	0.00371492	0.00567555	0.00757343	0.00444773
24	3390	0.00646651	0.00443452	0.0052777	0.0069564	0.00432188
25	3690	0.00549904	0.00348621	0.00519883	0.00688804	0.00450085
26	3990	0.00657758	0.00454777	0.00555869	0.00637402	0.00460289
27	4290	0.00602333	0.00358451	0.00601995	0.00554766	0.00456431
28	4590	0.00636295	0.00355257	0.00522578	0.00524886	0.00429298
		Normalized Data
	Time_(sec)	Roi1_corr_norm	Roi2_corr_norm	Roi3_corr_norm	Roi4_corr_norm	Roi5_corr_norm
1	0	1	1	1	1	1
2	30	0.975258	1.01319	1.06863	1.00306	1.02752
3	60	0.977125	1.15794	0.875262	1.09802	1.03119
4	90	0.936799	1.08409	0.889601	1.10594	1.05807
5	120	0.977776	1.13523	0.951357	1.16364	1.03642
6	150	0.99125	1.08104	0.98379	1.11391	1.02858
7	180	0.945186	1.06578	0.800703	1.13402	1.09558
8	210	0.468318	0.462606	0.537144	0.42154	0.4176
9	240	0.501112	0.592875	0.623786	0.527825	0.525268
10	270	0.546112	0.802754	0.728651	0.565919	0.444128
11	300	0.627818	0.66083	0.69487	0.468267	0.564653
12	330	0.644329	0.629319	0.661579	0.731555	0.522088
13	360	0.665134	0.63203	0.719323	0.716969	0.532268
14	390	0.673885	0.661555	0.809387	0.692366	0.558109
15	690	0.714756	0.71835	0.803725	0.757109	0.547953
16	990	0.637584	0.693954	0.874102	1.30298	0.543693
17	1290	0.786043	0.793827	0.813268	0.91178	0.597889
18	1590	0.748333	0.745082	0.899894	0.890702	0.736363
19	1890	0.684635	0.823026	1.11492	0.839906	0.768766
20	2190	0.716295	0.731432	1.15872	0.859806	0.77274
21	2490	0.722989	0.865823	1.07497	1.06651	0.815777
22	2790	0.694482	0.735474	1.11023	0.889426	0.780389
23	3090	0.686927	0.75488	1.09818	1.01163	0.915555
24	3390	0.883159	0.901104	1.0212	0.929212	0.88965
25	3690	0.751027	0.708404	1.00594	0.920081	0.92649
26	3990	0.898329	0.924116	1.07557	0.85142	0.947494
27	4290	0.822632	0.728379	1.16482	0.741038	0.939553
28	4590	0.869016	0.721889	1.01115	0.701126	0.8837
		Normalize the bouton fluorescent right after bleaching to 0
	Recovery Time_(sec)
1	0	0	0	0	0	0
2	30	0.0651197	0.212114	0.215884	0.159389	0.173094
3	60	0.154477	0.553854	0.477178	0.216516	0.0426484
4	90	0.316723	0.322762	0.393004	0.0700735	0.236412
5	120	0.349508	0.271454	0.310053	0.46491	0.167982
6	150	0.390822	0.275869	0.453934	0.443036	0.184348
7	180	0.408197	0.323943	0.678347	0.406141	0.225891
8	480	0.489357	0.41642	0.664237	0.503232	0.209563
9	780	0.336115	0.376697	0.839596	1.32184	0.202716
10	1080	0.630912	0.539318	0.688015	0.735181	0.289844
11	1380	0.556032	0.459948	0.903861	0.703572	0.512463
12	1680	0.429545	0.586862	1.43963	0.627397	0.564556
13	1980	0.492412	0.437722	1.54878	0.65724	0.570944
14	2280	0.505706	0.656548	1.34011	0.967222	0.640133
15	2580	0.449099	0.444303	1.42794	0.701658	0.583241
16	2880	0.434096	0.475902	1.39793	0.884925	0.800542
17	3180	0.823759	0.713993	1.20611	0.761323	0.758895
18	3480	0.561381	0.400226	1.16809	0.74763	0.818122
19	3780	0.853882	0.751464	1.34158	0.644663	0.851888
20	4080	0.703569	0.432751	1.56397	0.47913	0.839122
21	4380	0.795674	0.422183	1.18108	0.419277	0.74933

## Sheet: WT-1129-C4
		Raw Data
	Time_(sec)	Roi1	Roi2	Roi3	Roi4	Roi5	Ref_fluo	Background
1	0	1669270	1641335	1879349	1619277	1569555	361688269	34022477
2	30	1.6856e+06	1.63685e+06	1.88004e+06	1.61254e+06	1.54914e+06	3.59433e+08	3.39821e+07
3	60	1.6661e+06	1.66405e+06	1.85991e+06	1.64604e+06	1.55913e+06	3.60312e+08	3.39824e+07
4	90	1.68532e+06	1.6517e+06	1.89096e+06	1.62809e+06	1.57111e+06	3.62018e+08	3.40065e+07
5	120	1.68132e+06	1.66158e+06	1.88637e+06	1.60685e+06	1.5595e+06	3.61813e+08	3.39808e+07
6	150	1.66777e+06	1.66773e+06	1.8767e+06	1.61708e+06	1.5523e+06	3.61302e+08	3.39652e+07
7	180	1.67151e+06	1.656e+06	1.86114e+06	1.60323e+06	1.54636e+06	3.6006e+08	3.39518e+07
8	210	1.39279e+06	1.36361e+06	1.42213e+06	1.34167e+06	1.3191e+06	3.59176e+08	3.39487e+07
9	240	1.43157e+06	1.40157e+06	1.44292e+06	1.38713e+06	1.34379e+06	3.59694e+08	3.39355e+07
10	270	1.43744e+06	1.41652e+06	1.49097e+06	1.39223e+06	1.34608e+06	3.60375e+08	3.39323e+07
11	300	1.46804e+06	1.41143e+06	1.48546e+06	1.41208e+06	1.35596e+06	3.59197e+08	3.39451e+07
12	330	1.46308e+06	1.42033e+06	1.49035e+06	1.39297e+06	1.36849e+06	3.58307e+08	3.39113e+07
13	360	1.45907e+06	1.42591e+06	1.48249e+06	1.40935e+06	1.36239e+06	3.58721e+08	3.38588e+07
14	390	1.44793e+06	1.43448e+06	1.50002e+06	1.4101e+06	1.36127e+06	3.58878e+08	3.38895e+07
15	690	1.50551e+06	1.44303e+06	1.52303e+06	1.50347e+06	1.35896e+06	3.62458e+08	3.3957e+07
16	990	1.49366e+06	1.49739e+06	1.53377e+06	1.43785e+06	1.35459e+06	3.64741e+08	3.39407e+07
17	1290	1.50929e+06	1.51221e+06	1.56736e+06	1.446e+06	1.34417e+06	3.63497e+08	3.38683e+07
18	1590	1.57587e+06	1.51638e+06	1.55502e+06	1.49136e+06	1.35909e+06	3.63765e+08	3.39248e+07
19	1890	1.54442e+06	1.52587e+06	1.57482e+06	1.52683e+06	1.35342e+06	3.64251e+08	3.38442e+07
20	2190	1.55981e+06	1.52633e+06	1.61705e+06	1.53803e+06	1.3536e+06	3.62085e+08	3.38359e+07
21	2490	1.54663e+06	1.57404e+06	1.61836e+06	1.55195e+06	1.37621e+06	3.648e+08	3.38599e+07
22	2790	1.54769e+06	1.58947e+06	1.60733e+06	1.54864e+06	1.39012e+06	3.65143e+08	3.38239e+07
23	3090	1.55602e+06	1.56772e+06	1.6249e+06	1.54967e+06	1.38881e+06	3.65374e+08	3.38927e+07
24	3390	1.59134e+06	1.58299e+06	1.64675e+06	1.51736e+06	1.40312e+06	3.67081e+08	3.38747e+07
25	3690	1.58629e+06	1.58798e+06	1.66545e+06	1.51501e+06	1.42378e+06	3.67873e+08	3.39272e+07
26	3990	1.58605e+06	1.55952e+06	1.62843e+06	1.53099e+06	1.39797e+06	3.67079e+08	3.38788e+07
27	4290	1.5872e+06	1.58143e+06	1.65592e+06	1.54516e+06	1.39312e+06	3.6843e+08	3.39383e+07
28	4590	1.60314e+06	1.58507e+06	1.64911e+06	1.55061e+06	1.39266e+06	3.68593e+08	3.38827e+07
		Background corrected Data
	Time_(sec)	Roi1-bkgd-corr	Roi2-bkgd-corr	Roi3-bkgd-corr	Roi4-bkgd-corr	Roi5-bkgd-corr	Ref_fluo-bkgd-corr
1	0	419857	391922	629936	369864	320142	6.92856e+07
2	30	437670	388915	632110	364610	301208	6.73773e+07
3	60	418157	416111	611969	398100	311194	6.82539e+07
4	90	436493	402868	642127	379259	322278	6.97527e+07
5	120	433432	413695	638486	358964	311615	6.9768e+07
6	150	420461	420425	629388	369768	304987	6.93916e+07
7	180	424698	409181	614323	356411	299544	6.82651e+07
8	210	146091	116910	175426	94970.3	72401.2	6.74078e+07
9	240	185356	155350	196706	140907	97569.1	6.80386e+07
10	270	191333	170416	244872	146123	99979.5	6.87473e+07
11	300	221468	164853	238892	165512	109384	6.74588e+07
12	330	217746	175002	245016	147636	123157	6.68596e+07
13	360	215664	182507	239089	165945	118991	6.77253e+07
14	390	203401	189953	255490	165569	116746	6.76186e+07
15	690	258498	196023	276018	256465	111953	7.06181e+07
16	990	247244	250982	287357	191437	108177	7.3041e+07
17	1290	265537	268459	323608	202248	100417	7.24195e+07
18	1590	330048	270555	309197	245530	113266	7.22022e+07
19	1890	301554	283001	331955	283960	110555	7.33799e+07
20	2190	317245	283765	374493	295466	111034	7.12854e+07
21	2490	303187	330598	374919	308511	132772	7.37945e+07
22	2790	305564	347351	365207	306517	147999	7.44468e+07
23	3090	311376	323068	380249	305020	144167	7.4087e+07
24	3390	347354	339009	402759	273377	159133	7.59483e+07
25	3690	340381	342062	419540	269098	177864	7.62891e+07
26	3990	341913	315382	384291	286851	153835	7.59113e+07
27	4290	340872	335109	409594	298836	146801	7.67509e+07
28	4590	358860	340786	404833	306328	148377	7.73918e+07
		Bleaching Corrected Data
	Time_(sec)	Roi1-bkgd_bleach-corr	Roi2-bkgd_bleach-corr	Roi3-bkgd_bleach-corr	Roi4-bkgd_bleach-corr	Roi5-bkgd_bleach-corr
1	0	0.0060598	0.00565662	0.00909188	0.00533825	0.00462061
2	30	0.00649581	0.0057722	0.00938165	0.00541147	0.00447046
3	60	0.00612649	0.00609652	0.00896606	0.00583264	0.00455937
4	90	0.00625771	0.00577567	0.00920577	0.00543719	0.00462029
5	120	0.00621248	0.00592957	0.00915156	0.0051451	0.00446644
6	150	0.00605925	0.00605873	0.00907009	0.00532871	0.00439516
7	180	0.00622131	0.005994	0.00899908	0.00522099	0.00438795
8	210	0.00216727	0.00173436	0.00260246	0.00140889	0.00107408
9	240	0.00272427	0.00228326	0.00289109	0.00207099	0.00143403
10	270	0.00278314	0.00247888	0.00356191	0.00212551	0.0014543
11	300	0.00328301	0.00244376	0.0035413	0.00245353	0.0016215
12	330	0.00325677	0.00261745	0.00366464	0.00220815	0.00184203
13	360	0.00318439	0.00269482	0.00353028	0.00245027	0.00175697
14	390	0.00300806	0.00280919	0.0037784	0.00244857	0.00172653
15	690	0.00366051	0.00277582	0.00390861	0.00363172	0.00158534
16	990	0.00338501	0.00343618	0.00393419	0.00262094	0.00148105
17	1290	0.00366665	0.003707	0.00446852	0.00279273	0.00138661
18	1590	0.00457116	0.00374719	0.00428238	0.00340058	0.00156873
19	1890	0.00410949	0.00385665	0.00452379	0.00386973	0.00150662
20	2190	0.00445034	0.00398069	0.00525343	0.00414484	0.0015576
21	2490	0.00410854	0.00447998	0.00508059	0.00418067	0.00179921
22	2790	0.00410446	0.00466576	0.00490561	0.00411727	0.00198798
23	3090	0.00420285	0.00436066	0.00513246	0.00411704	0.00194592
24	3390	0.00457356	0.00446368	0.00530307	0.00359951	0.00209528
25	3690	0.00446173	0.00448376	0.00549935	0.00352734	0.00233145
26	3990	0.00450411	0.00415461	0.00506236	0.00377877	0.00202651
27	4290	0.00444128	0.00436619	0.00533666	0.00389358	0.0019127
28	4590	0.00463693	0.00440339	0.00523096	0.00395815	0.00191722
		Normalized Data
	Time_(sec)	Roi1_corr_norm	Roi2_corr_norm	Roi3_corr_norm	Roi4_corr_norm	Roi5_corr_norm
1	0	1	1	1	1	1
2	30	1.07195	1.02043	1.03187	1.01371	0.967503
3	60	1.011	1.07777	0.986162	1.09261	0.986744
4	90	1.03266	1.02105	1.01253	1.01853	0.99993
5	120	1.02519	1.04825	1.00656	0.963817	0.966633
6	150	0.999908	1.07109	0.997604	0.998213	0.951207
7	180	1.02665	1.05964	0.989794	0.978033	0.949646
8	210	0.357647	0.306608	0.286241	0.263924	0.232453
9	240	0.449564	0.403644	0.317986	0.387953	0.310354
10	270	0.459278	0.438227	0.391769	0.398166	0.314743
11	300	0.541769	0.432018	0.389502	0.459613	0.350927
12	330	0.537439	0.462724	0.403068	0.413647	0.398655
13	360	0.525495	0.476401	0.388289	0.459001	0.380245
14	390	0.496395	0.49662	0.41558	0.458684	0.373659
15	690	0.604064	0.490721	0.429901	0.680319	0.343101
16	990	0.5586	0.607462	0.432715	0.490974	0.32053
17	1290	0.605077	0.655338	0.491485	0.523155	0.300092
18	1590	0.754342	0.662444	0.471012	0.637022	0.339507
19	1890	0.678156	0.681795	0.497564	0.724905	0.326064
20	2190	0.734404	0.703722	0.577816	0.77644	0.337099
21	2490	0.677998	0.79199	0.558805	0.783154	0.389388
22	2790	0.677325	0.824832	0.53956	0.771276	0.430241
23	3090	0.693561	0.770895	0.564511	0.771234	0.421139
24	3390	0.754738	0.789107	0.583276	0.674286	0.453463
25	3690	0.736283	0.792657	0.604864	0.660768	0.504575
26	3990	0.743277	0.734469	0.556801	0.707866	0.43858
27	4290	0.732908	0.771873	0.586971	0.729373	0.413949
28	4590	0.765194	0.77845	0.575345	0.741469	0.414927
		Normalize the bouton fluorescent right after bleaching to 0
	Recovery Time_(sec)
1	0	0	0	0	0	0
2	30	0.137959	0.131844	0.0442594	0.166404	0.104977
3	60	0.152539	0.178831	0.147126	0.180106	0.110892
4	90	0.276351	0.170395	0.143966	0.262547	0.159653
5	120	0.269851	0.212115	0.162879	0.200877	0.22397
6	150	0.251924	0.230699	0.142275	0.261726	0.199162
7	180	0.208249	0.25817	0.180324	0.261301	0.190286
8	480	0.369849	0.250156	0.20029	0.558657	0.149106
9	780	0.301612	0.408772	0.204213	0.304623	0.118691
10	1080	0.37137	0.473821	0.286149	0.347798	0.0911479
11	1380	0.595402	0.483475	0.257606	0.500567	0.144263
12	1680	0.481054	0.509767	0.294625	0.618476	0.126148
13	1980	0.565478	0.53956	0.406511	0.687618	0.141018
14	2280	0.480818	0.65949	0.380007	0.696625	0.211482
15	2580	0.479808	0.704112	0.353175	0.680689	0.266535
16	2880	0.504177	0.630828	0.387961	0.680633	0.254269
17	3180	0.595998	0.655573	0.414124	0.550562	0.297829
18	3480	0.568298	0.660396	0.444221	0.532426	0.366706
19	3780	0.578796	0.581336	0.377212	0.595615	0.277773
20	4080	0.563233	0.632157	0.419275	0.62447	0.24458
21	4380	0.611691	0.641093	0.403066	0.640699	0.245899

## Sheet: WT-1130-C4
		Raw Data
	Time_(sec)	Roi1	Roi2	Roi3	Roi4	Roi5	Ref_fluo	Background
1	0	2082912	2187303	2343376	2049213	1902253	701862416	29716220
2	30	2.08232e+06	2.15514e+06	2.3449e+06	2.01001e+06	1.92452e+06	7.01186e+08	2.96206e+07			Filter out due be large abrupt change.
3	60	2.11753e+06	2.20769e+06	2.33227e+06	2.01178e+06	1.87152e+06	7.02635e+08	2.97123e+07
4	90	2.08184e+06	2.16833e+06	2.33759e+06	2.03113e+06	1.90631e+06	7.03113e+08	2.96702e+07
5	120	2.1329e+06	2.15794e+06	2.35421e+06	1.9907e+06	1.93947e+06	704898137	2.96983e+07
6	150	2.16199e+06	2.14054e+06	2.34462e+06	1.96651e+06	1.9085e+06	7.04747e+08	2.96842e+07
7	180	2.13362e+06	2.14037e+06	2.36603e+06	2.00956e+06	1.92848e+06	7.0217e+08	2.95984e+07
8	210	1.46044e+06	1.54428e+06	1.66031e+06	1.88239e+06	1.59964e+06	7.00896e+08	2.96425e+07
9	240	1.49491e+06	1.58839e+06	1.77613e+06	1.93927e+06	1.63204e+06	7.03176e+08	2.96558e+07
10	270	1.51815e+06	1.58767e+06	1.76414e+06	1.94864e+06	1.64706e+06	7.00798e+08	2.96546e+07
11	300	1.53993e+06	1.62084e+06	1.81032e+06	1.94011e+06	1.62934e+06	702029555	2.95758e+07
12	330	1.53126e+06	1.65888e+06	1.76521e+06	1.94417e+06	1.62714e+06	7.03039e+08	2.95352e+07
13	360	1.55324e+06	1.63991e+06	1.75013e+06	1.98017e+06	1.65151e+06	6.99631e+08	2.95482e+07
14	390	1.55014e+06	1.63125e+06	1.7667e+06	2.0332e+06	1.64771e+06	7.00314e+08	2.95617e+07
15	690	1.59237e+06	1.69932e+06	1.81557e+06	1.99886e+06	1.71461e+06	7.10472e+08	2.96207e+07
16	990	1633654	1.74999e+06	1.92201e+06	2.07575e+06	1.71459e+06	7.14236e+08	2.9621e+07
17	1290	1.68692e+06	1.74998e+06	1.94386e+06	2.04808e+06	1.74547e+06	7.20486e+08	2.98879e+07
18	1590	1.6696e+06	1.80461e+06	1.90196e+06	2.15068e+06	1.7725e+06	7.18752e+08	2.96026e+07
19	1890	1.67029e+06	1.81506e+06	1.92258e+06	2.15955e+06	1.85728e+06	7.21306e+08	2.96339e+07
20	2190	1.67651e+06	1.83622e+06	1.96071e+06	2.16494e+06	1.74314e+06	7.13471e+08	2.94291e+07
21	2490	1.6776e+06	1.87386e+06	1.95909e+06	2.11705e+06	1.75276e+06	7.1718e+08	2.97171e+07
22	2790	1.70426e+06	1.88143e+06	1.97327e+06	2.05057e+06	1.74145e+06	7.21321e+08	2.9671e+07
23	3090	1.6793e+06	1.99081e+06	2.01981e+06	2.14578e+06	1.7442e+06	7.22576e+08	2.96645e+07
24	3390	1.69221e+06	1.96747e+06	2.05697e+06	2.12338e+06	1.80386e+06	722858552	2.9676e+07
25	3690	1.69381e+06	1.94034e+06	2.10462e+06	2.03128e+06	1.77793e+06	7.20995e+08	2.95979e+07
26	3990	1.71174e+06	1.98207e+06	2.16386e+06	2.04816e+06	1.60258e+06	7.32843e+08	3.22416e+07
27	4290	1.69253e+06	1.96242e+06	2.13511e+06	2.06139e+06	1.78248e+06	7.34329e+08	2.9698e+07
28	4590	1.73213e+06	1.98381e+06	2.27302e+06	2.04726e+06	1.55331e+06	7.26234e+08	2.95911e+07
		Background corrected Data
	Time_(sec)	Roi1-bkgd-corr	Roi2-bkgd-corr	Roi3-bkgd-corr	Roi4-bkgd-corr	Roi5-bkgd-corr	Ref_fluo-bkgd-corr
1	0	808660	913051	1.06912e+06	774961	628001	1.82784e+08
2	30	812170	884985	1.07475e+06	739858	654365	1.83778e+08
3	60	843444	933604	1.05819e+06	737693	597439	1.83626e+08
4	90	809560	896055	1.06531e+06	758850	634029	1.84838e+08
5	120	859412	884456	1.08072e+06	717215	665987	1.86133e+08
6	150	889106	867662	1.07174e+06	693636	635618	1.86228e+08
7	180	864424	871171	1.09683e+06	740360	659281	1.8515e+08
8	210	189350	273184	389221	611293	328552	1.83105e+08
9	240	223249	316728	504470	667603	360375	1.85153e+08
10	270	246543	316056	492531	677033	375445	182795244
11	300	271703	352612	542088	671882	361104	185403970
12	330	264773	392390	498721	677681	360650	187122837
13	360	286192	372862	483084	713126	384463	1.83488e+08
14	390	282514	363617	499067	765570	380080	1.83934e+08
15	690	322213	429164	545417	728707	444457	1.93062e+08
16	990	363485	479818	651838	805584	444421	1.96822e+08
17	1290	405308	468365	662244	766468	463862	1.98409e+08
18	1590	400220	535231	632583	881296	503118	2.01659e+08
19	1890	399562	544331	651853	888830	586555	203665134
20	2190	414567	574283	698772	903002	481201	1.99408e+08
21	2490	403306	599571	684796	842762	478465	1.98086e+08
22	2790	431946	609119	700955	778260	469139	2.03033e+08
23	3090	407266	718776	747781	873747	472163	204402237
24	3390	419687	694943	784444	850853	531336	2.04484e+08
25	3690	424626	671165	835438	762100	508747	2.03984e+08
26	3990	329197	599533	781324	665619	220044	1.69652e+08
27	4290	419058	688948	861635	787918	509007	2.15569e+08
28	4590	463240	714926	1.00414e+06	778374	284425	209342596
		Bleaching Corrected Data
	Time_(sec)	Roi1-bkgd_bleach-corr	Roi2-bkgd_bleach-corr	Roi3-bkgd_bleach-corr	Roi4-bkgd_bleach-corr	Roi5-bkgd_bleach-corr
1	0	0.00442412	0.00499524	0.0058491	0.00423976	0.00343575
2	30	0.00441929	0.0048155	0.00584809	0.00402582	0.00356062
3	60	0.00459327	0.00508426	0.00576272	0.00401737	0.00325356
4	90	0.00437983	0.00484778	0.00576347	0.00410548	0.00343018
5	120	0.0046172	0.00475175	0.00580619	0.00385324	0.00357802
6	150	0.00477428	0.00465912	0.00575496	0.00372465	0.00341311
7	180	0.00466877	0.00470521	0.005924	0.0039987	0.00356079
8	210	0.00103411	0.00149195	0.00212567	0.00333848	0.00179433
9	240	0.00120575	0.00171062	0.0027246	0.00360568	0.00194636
10	270	0.00134874	0.00172902	0.00269444	0.00370378	0.00205391
11	300	0.00146546	0.00190186	0.00292382	0.00362388	0.00194766
12	330	0.00141497	0.00209697	0.00266521	0.00362158	0.00192734
13	360	0.00155974	0.00203208	0.00263279	0.00388651	0.00209531
14	390	0.00153595	0.00197688	0.00271329	0.00416219	0.00206639
15	690	0.00166896	0.00222293	0.00282508	0.00377446	0.00230214
16	990	0.00184677	0.00243783	0.00331182	0.00409296	0.00225799
17	1290	0.00204279	0.0023606	0.00333776	0.00386306	0.0023379
18	1590	0.00198464	0.00265414	0.00313689	0.00437023	0.0024949
19	1890	0.00196186	0.00267268	0.00320061	0.00436418	0.00288
20	2190	0.00207899	0.00287993	0.00350423	0.00452841	0.00241314
21	2490	0.00203601	0.00302682	0.00345706	0.00425452	0.00241544
22	2790	0.00212746	0.00300009	0.00345241	0.00383316	0.00231065
23	3090	0.00199247	0.00351648	0.00365838	0.00427464	0.00230997
24	3390	0.00205242	0.00339853	0.00383622	0.00416099	0.00259843
25	3690	0.00208167	0.00329029	0.00409562	0.00373609	0.00249406
26	3990	0.00194042	0.00353389	0.00460544	0.00392344	0.00129703
27	4290	0.00194396	0.00319595	0.00399702	0.00365506	0.00236122
28	4590	0.00221283	0.0034151	0.00479663	0.00371818	0.00135866
		Normalized Data
	Time_(sec)	Roi1_corr_norm	Roi2_corr_norm	Roi3_corr_norm	Roi4_corr_norm	Roi5_corr_norm
1	0	1	1	1	1	1
2	30	0.998908	0.964019	0.999826	0.94954	1.03635
3	60	1.03823	1.01782	0.985232	0.947546	0.946973
4	90	0.989988	0.97048	0.985359	0.968329	0.99838
5	120	1.04364	0.951256	0.992663	0.908837	1.04141
6	150	1.07915	0.932713	0.983904	0.878506	0.99341
7	180	1.0553	0.94194	1.0128	0.943144	1.03639
8	210	0.233743	0.298675	0.363418	0.787422	0.522254
9	240	0.272541	0.342451	0.465816	0.850445	0.566502
10	270	0.30486	0.346133	0.460659	0.873583	0.597806
11	300	0.331244	0.380734	0.499876	0.854738	0.56688
12	330	0.319831	0.419793	0.455661	0.854196	0.560967
13	360	0.352553	0.406805	0.450119	0.916682	0.609856
14	390	0.347177	0.395754	0.463882	0.981706	0.601438
15	690	0.37724	0.44501	0.482994	0.890255	0.670056
16	990	0.417433	0.488031	0.56621	0.965377	0.657204
17	1290	0.461739	0.47257	0.570646	0.911152	0.680463
18	1590	0.448595	0.531334	0.536304	1.03077	0.726158
19	1890	0.443445	0.535045	0.547197	1.02935	0.838244
20	2190	0.469921	0.576536	0.599105	1.06808	0.702363
21	2490	0.460208	0.605941	0.591042	1.00348	0.703031
22	2790	0.480878	0.600591	0.590246	0.9041	0.672531
23	3090	0.450366	0.703966	0.62546	1.00823	0.672334
24	3390	0.463917	0.680354	0.655865	0.981421	0.756292
25	3690	0.470527	0.658686	0.700213	0.881203	0.725914
26	3990	0.438601	0.707452	0.787377	0.925392	0.37751
27	4290	0.4394	0.639799	0.683357	0.862091	0.687251
28	4590	0.500174	0.683671	0.820063	0.87698	0.395448
		Normalize the bouton fluorescent right after bleaching to 0
	Recovery Time_(sec)
1	0	0	0	0	0	0
2	30	0.0487672	0.0653726	0.16232	0.406992	0.0911765
3	60	0.0893912	0.0708706	0.154145	0.556416	0.15568
4	90	0.122555	0.122541	0.216311	0.434719	0.0919559
5	120	0.108209	0.18087	0.146223	0.431218	0.0797719
6	150	0.149339	0.161473	0.137437	0.834745	0.18051
7	180	0.142582	0.144971	0.159254	1.25466	0.163164
8	480	0.18037	0.218526	0.189551	0.664084	0.304556
9	780	0.23089	0.282772	0.321465	1.14921	0.278074
10	1080	0.286581	0.259683	0.328496	0.799033	0.326
11	1380	0.27006	0.347438	0.274057	1.57154	0.420156
12	1680	0.263587	0.352979	0.291325	1.56232	0.651117
13	1980	0.296865	0.414939	0.37361	1.81247	0.371126
14	2280	0.284656	0.45885	0.360827	1.39529	0.372503
15	2580	0.310638	0.45086	0.359567	0.75349	0.309656
16	2880	0.272285	0.605234	0.415387	1.42595	0.309249
17	3180	0.289318	0.569973	0.463585	1.25282	0.48225
18	3480	0.297626	0.537615	0.533885	0.605627	0.419654
19	3780	0.257497	0.61044	0.672056	0.890992	-0.298252
20	4080	0.258502	0.509412	0.507165	0.482206	0.339987
21	4380	0.334892	0.574927	0.72387	0.578356	-0.26129

## Sheet: WT-0131-C1
		Raw Data
	Time_(sec)	Roi1	Roi2	Roi3	Roi4	Roi5	Ref_fluo	Background
1	0	2292718	1395464	1274858	1380038	1609473	470246246	40558816			Filter out due to wrong targeting.
2	30	2.37842e+06	1.43972e+06	1.29782e+06	1.5794e+06	1.6473e+06	4.8971e+08	4.04921e+07
3	60	2.34434e+06	1.40086e+06	1.2972e+06	1.44414e+06	1.57763e+06	4.91535e+08	4.04728e+07
4	90	2.32776e+06	1.43058e+06	1.32514e+06	1.42203e+06	1.58914e+06	4.91386e+08	4.07135e+07
5	120	2.38253e+06	1.40947e+06	1.30058e+06	1.42312e+06	1.5786e+06	4.94519e+08	4.06728e+07
6	150	2.31977e+06	1.43461e+06	1.26602e+06	1.35967e+06	1.56141e+06	4.91022e+08	4.05562e+07
7	180	2.25621e+06	1.40336e+06	1.29767e+06	1.37666e+06	1.58373e+06	4.91588e+08	4.05747e+07
8	210	1.02255e+06	817203	822927	813178	818401	4.89425e+08	4.06477e+07
9	240	1.14568e+06	884852	842138	899106	849259	4.90169e+08	4.06675e+07
10	270	1.22957e+06	901603	835404	893882	904837	4.93165e+08	4.07228e+07
11	300	1.28608e+06	925902	862276	922601	919915	4.93268e+08	4.08448e+07
12	330	1.29638e+06	899679	861321	887366	904060	4.87082e+08	4.06392e+07
13	360	1.53759e+06	882473	842309	901154	901058	4.91165e+08	4.07564e+07
14	390	1.56761e+06	936256	861552	940079	915949	4.97245e+08	4.08858e+07
15	690	1.56415e+06	924157	864321	925952	903705	4.99199e+08	4.07094e+07
16	990	1.69813e+06	979837	917525	954089	1.02528e+06	5.05236e+08	4.08822e+07
17	1290	1.76986e+06	1.02868e+06	948878	1.23171e+06	1.20586e+06	5.02886e+08	4.07937e+07
18	1590	1.86224e+06	1.0526e+06	1.02166e+06	1.0093e+06	1.11258e+06	5.05357e+08	4.08391e+07
19	1890	1.95523e+06	1.00281e+06	1.01995e+06	1.00251e+06	1.15831e+06	5.07009e+08	4.08412e+07
20	2190	1.91723e+06	1.06601e+06	964304	1.01102e+06	846834	5.13141e+08	4.11457e+07
21	2490	2.15473e+06	1.07692e+06	1.00415e+06	1.06105e+06	944785	5.10724e+08	4.09665e+07
22	2790	1.97889e+06	1.1115e+06	990429	1.0838e+06	859465	5.08634e+08	4.08951e+07
23	3090	2.1613e+06	1.13111e+06	1.11899e+06	1.06949e+06	977216	5.10121e+08	4.10566e+07
24	3390	2.17494e+06	1.16859e+06	1.05157e+06	1.05147e+06	1.10707e+06	5.10785e+08	4.07971e+07
25	3690	2.23193e+06	1.20393e+06	1.13135e+06	983528	888975	5.1162e+08	4.10897e+07
26	3990	2.17979e+06	1.24047e+06	1.25551e+06	1.04982e+06	890233	5.09293e+08	4.08863e+07
27	4290	2.3889e+06	1.24021e+06	1.19957e+06	1.20226e+06	899223	5.08994e+08	4.09647e+07
28	4590	2.42447e+06	1.24056e+06	1.21101e+06	1.08119e+06	791594	5.09307e+08	4.09248e+07
		Background corrected Data
	Time_(sec)	Roi1-bkgd-corr	Roi2-bkgd-corr	Roi3-bkgd-corr	Roi4-bkgd-corr	Roi5-bkgd-corr	Ref_fluo-bkgd-corr
1	0	1.60615e+06	708899	588293	693473	922908	1.66364e+08
2	30	1.69299e+06	754288	612387	893965	961860	1.86328e+08
3	60	1.65923e+06	715753	612092	759030	892520	1.88297e+08
4	90	1.63858e+06	741398	635958	732846	899954	1.86345e+08
5	120	1.69403e+06	720980	612088	734629	890104	1.89783e+08
6	150	1.63325e+06	748092	579497	673146	874886	1.8716e+08
7	180	1.56938e+06	716529	610834	689823	896896	1.87587e+08
8	210	334482	129135	134858	125109	130332	1.84877e+08
9	240	457275	196446	153732	210700	160853	1.85472e+08
10	270	540232	212263	146064	204542	215497	1.88055e+08
11	300	594677	234496	170870	231195	228508	1.87243e+08
12	330	608456	211754	173396	199441	216134	1.82598e+08
13	360	847679	192563	152399	211245	211148	1.85802e+08
14	390	875513	244156	169453	247979	223849	1.90913e+08
15	690	875038	235043	175207	236838	214591	1.94189e+08
16	990	1.00609e+06	287798	225486	262050	333245	1.98931e+08
17	1290	1.07932e+06	338137	258337	541168	515320	1.97244e+08
18	1590	1.17093e+06	361290	330347	317990	421272	1.99375e+08
19	1890	1.26389e+06	311468	328605	311162	466967	2.01011e+08
20	2190	1.22073e+06	369506	267804	314519	150335	2.04862e+08
21	2490	1.46126e+06	383456	310688	367583	251320	2.03787e+08
22	2790	1.28663e+06	419241	298172	391541	167207	2.02232e+08
23	3090	1.4663e+06	436121	423997	374499	282226	2.02509e+08
24	3390	1.48434e+06	477990	360971	360874	416477	2.05118e+08
25	3690	1.53638e+06	508377	435803	287976	193423	2.0376e+08
26	3990	1.48769e+06	548358	563403	357715	198125	2.02957e+08
27	4290	1.69547e+06	546773	506131	508821	205788	2.02071e+08
28	4590	1.73171e+06	547804	518249	388427	98833.6	2.02683e+08
		Bleaching Corrected Data
	Time_(sec)	Roi1-bkgd_bleach-corr	Roi2-bkgd_bleach-corr	Roi3-bkgd_bleach-corr	Roi4-bkgd_bleach-corr	Roi5-bkgd_bleach-corr
1	0	0.00965445	0.00426113	0.00353618	0.00416841	0.00554752
2	30	0.00908608	0.00404818	0.00328661	0.00479781	0.0051622
3	60	0.00881178	0.00380119	0.00325067	0.00403102	0.00473996
4	90	0.00879325	0.00397863	0.0034128	0.00393273	0.0048295
5	120	0.00892615	0.00379897	0.0032252	0.00387089	0.00469011
6	150	0.00872649	0.00399708	0.00309627	0.00359664	0.00467454
7	180	0.00836617	0.00381972	0.00325628	0.00367736	0.00478124
8	210	0.00180921	0.000698489	0.000729445	0.000676716	0.000704964
9	240	0.00246546	0.00105917	0.000828871	0.00113602	0.000867265
10	270	0.00287274	0.00112873	0.000776712	0.00108767	0.00114593
11	300	0.00317597	0.00125236	0.000912556	0.00123473	0.00122038
12	330	0.00333222	0.00115967	0.000949604	0.00109224	0.00118366
13	360	0.00456227	0.00103639	0.000820224	0.00113693	0.00113642
14	390	0.00458592	0.00127889	0.000887589	0.00129891	0.00117252
15	690	0.00450612	0.00121038	0.000902252	0.00121963	0.00110506
16	990	0.00505747	0.00144672	0.00113349	0.00131729	0.00167518
17	1290	0.005472	0.00171431	0.00130973	0.00274364	0.0026126
18	1590	0.00587302	0.00181212	0.00165692	0.00159493	0.00211296
19	1890	0.00628764	0.00154951	0.00163476	0.00154798	0.00232309
20	2190	0.00595881	0.00180368	0.00130724	0.00153528	0.000733835
21	2490	0.00717052	0.00188165	0.00152457	0.00180376	0.00123325
22	2790	0.00636212	0.00207307	0.0014744	0.0019361	0.000826807
23	3090	0.00724068	0.00215359	0.00209371	0.00184929	0.00139364
24	3390	0.00723652	0.00233032	0.00175982	0.00175935	0.00203042
25	3690	0.00754013	0.00249497	0.0021388	0.00141331	0.000949267
26	3990	0.00733005	0.00270184	0.00277597	0.00176251	0.00097619
27	4290	0.00839046	0.00270585	0.00250472	0.00251803	0.00101839
28	4590	0.00854394	0.00270277	0.00255695	0.00191643	0.000487627
		Normalized Data
	Time_(sec)	Roi1_corr_norm	Roi2_corr_norm	Roi3_corr_norm	Roi4_corr_norm	Roi5_corr_norm
1	0	1	1	1	1	1
2	30	0.941129	0.950025	0.929425	1.15099	0.930541
3	60	0.912717	0.892061	0.919262	0.967042	0.854428
4	90	0.910798	0.933702	0.965109	0.943462	0.87057
5	120	0.924564	0.89154	0.912057	0.928626	0.845443
6	150	0.903883	0.938032	0.875599	0.862834	0.842637
7	180	0.866561	0.89641	0.920847	0.882197	0.861869
8	210	0.187397	0.163921	0.206281	0.162344	0.127077
9	240	0.255371	0.248565	0.234397	0.272531	0.156334
10	270	0.297556	0.264889	0.219647	0.260933	0.206566
11	300	0.328964	0.293903	0.258063	0.296211	0.219987
12	330	0.345148	0.272151	0.268539	0.262028	0.213368
13	360	0.472557	0.24322	0.231952	0.272751	0.204851
14	390	0.475006	0.300128	0.251002	0.311608	0.211359
15	690	0.466741	0.284052	0.255149	0.292588	0.199199
16	990	0.523849	0.339516	0.32054	0.316018	0.301969
17	1290	0.566785	0.402313	0.370381	0.658199	0.470948
18	1590	0.608323	0.425266	0.468561	0.382624	0.380884
19	1890	0.651269	0.363638	0.462296	0.371361	0.418762
20	2190	0.617208	0.423288	0.369677	0.368312	0.132282
21	2490	0.742717	0.441584	0.431135	0.432721	0.222306
22	2790	0.658984	0.486506	0.416948	0.464469	0.149041
23	3090	0.749984	0.505402	0.592084	0.443645	0.251219
24	3390	0.749553	0.546877	0.497661	0.422067	0.366005
25	3690	0.781001	0.585519	0.604833	0.339053	0.171116
26	3990	0.759241	0.634067	0.785019	0.422827	0.175969
27	4290	0.869077	0.635007	0.708313	0.604076	0.183576
28	4590	0.884974	0.634284	0.723082	0.459752	0.0879001
		Normalize the bouton fluorescent right after bleaching to 0
	Recovery Time_(sec)
1	0	0	0	0	0	0
2	30	0.0924299	0.11066	0.0387564	0.137765	0.0385247
3	60	0.149793	0.132002	0.0184244	0.123264	0.10467
4	90	0.192501	0.169933	0.0713766	0.167372	0.122343
5	120	0.214508	0.141496	0.0858179	0.124633	0.113627
6	150	0.387756	0.103671	0.0353856	0.138039	0.102412
7	180	0.391086	0.178071	0.0616446	0.186622	0.110981
8	480	0.379847	0.157054	0.06736	0.162842	0.0949697
9	780	0.457503	0.229566	0.157496	0.192136	0.230297
10	1080	0.515887	0.311662	0.226197	0.619958	0.452807
11	1380	0.572369	0.341671	0.361529	0.275412	0.334211
12	1680	0.630766	0.2611	0.352893	0.26133	0.384088
13	1980	0.584451	0.339084	0.225226	0.257518	0.00685309
14	2280	0.755116	0.363004	0.30994	0.338047	0.125396
15	2580	0.641257	0.421733	0.290385	0.377741	0.0289215
16	2880	0.764998	0.446437	0.531793	0.351705	0.16347
17	3180	0.764411	0.50066	0.401641	0.324727	0.314619
18	3480	0.807173	0.551178	0.549367	0.220935	0.0579893
19	3780	0.777585	0.614647	0.797735	0.325676	0.0643798
20	4080	0.926939	0.615876	0.692004	0.552288	0.0743975
21	4380	0.948555	0.614931	0.712362	0.371843	-0.0515882

## Sheet: WT-0205-C1
		Raw Data
	Time_(sec)	Roi1	Roi2	Roi3	Roi4	Roi5	Ref_fluo	Background
1	0	1666070	2283001	1494733	1515908	1456691	793778490	18857835
2	30	1.66307e+06	2.35718e+06	1.48402e+06	1.52748e+06	1.49011e+06	8.04831e+08	1.89215e+07			Filter out due to wrong targeting.
3	60	1.66837e+06	2.36283e+06	1.48316e+06	1.54316e+06	1.477e+06	8.04013e+08	1.89021e+07
4	90	1.64853e+06	2.34776e+06	1.47494e+06	1.52826e+06	1.49265e+06	8.0508e+08	1.88813e+07
5	120	1.67582e+06	2.33347e+06	1.4809e+06	1.54606e+06	1.48946e+06	8.09306e+08	1.89207e+07
6	150	1.69288e+06	2.37071e+06	1.4832e+06	1.58586e+06	1.51416e+06	8.12476e+08	1.89197e+07
7	180	1.68551e+06	2.3986e+06	1.4579e+06	1.55021e+06	1.4866e+06	8.11948e+08	1.89348e+07
8	210	1.32419e+06	1.53568e+06	1.14909e+06	1.18587e+06	1.23865e+06	8.08824e+08	1.88952e+07
9	240	1.37509e+06	1.65696e+06	1.16854e+06	1.21806e+06	1.27464e+06	8.11018e+08	1.89102e+07
10	270	1.39416e+06	1.69558e+06	1.18493e+06	1.21665e+06	1.28757e+06	8.10168e+08	1.89225e+07
11	300	1.4045e+06	1.77999e+06	1.18091e+06	1.2195e+06	1.28927e+06	8.13288e+08	1.89398e+07
12	330	1.37796e+06	1.72151e+06	1.19188e+06	1.19594e+06	1.28759e+06	8.02993e+08	1.89054e+07
13	360	1.39294e+06	1.7351e+06	1.21091e+06	1.21319e+06	1.30305e+06	8.02834e+08	1.89038e+07
14	390	1.37851e+06	1.69205e+06	1.24026e+06	1.21456e+06	1.29063e+06	8.04613e+08	1.8898e+07
15	690	1.41626e+06	1.84343e+06	1.24219e+06	1.25515e+06	1.33012e+06	8.12112e+08	1.89059e+07
16	990	1.42421e+06	1.96818e+06	1.25579e+06	1.29107e+06	1.34125e+06	8.15302e+08	1.8941e+07
17	1290	1.41008e+06	1.68068e+06	1.19896e+06	1.27768e+06	1.33544e+06	8.12289e+08	1.88715e+07
18	1590	1.3818e+06	1.8518e+06	1.18105e+06	1.28119e+06	1.34467e+06	8.1695e+08	1.89433e+07
19	1890	1.4272e+06	1.97066e+06	1.22736e+06	1.40138e+06	1.37674e+06	8.19937e+08	1.89318e+07
20	2190	1.3961e+06	1.89738e+06	1.24586e+06	1.43292e+06	1.39385e+06	8.16308e+08	1.89282e+07
21	2490	1.38448e+06	1.93062e+06	1.27896e+06	1.40968e+06	1.43212e+06	8.23855e+08	1.89896e+07
22	2790	1.40074e+06	1.7982e+06	1.26683e+06	1.45345e+06	1.40164e+06	8.13761e+08	1.89004e+07
23	3090	1.36069e+06	1.77364e+06	1.31395e+06	1.43125e+06	1.42432e+06	8.17328e+08	1.89836e+07
24	3390	1.38212e+06	1.88105e+06	1.28831e+06	1.3965e+06	1.42157e+06	8.11934e+08	1.89459e+07
25	3690	1.35591e+06	1.94544e+06	1.27772e+06	1.35565e+06	1.3826e+06	8.05323e+08	1.89684e+07
26	3990	1.31408e+06	1.95824e+06	1.28374e+06	1.32927e+06	1.38055e+06	8.07698e+08	1.88947e+07
27	4290	1.33875e+06	1.83169e+06	1.26626e+06	1.35352e+06	1.38479e+06	7.96635e+08	1.89583e+07
28	4590	1.38698e+06	1.99954e+06	1.26389e+06	1.37103e+06	1.37776e+06	8.03804e+08	1.89067e+07
		Background corrected Data
	Time_(sec)	Roi1-bkgd-corr	Roi2-bkgd-corr	Roi3-bkgd-corr	Roi4-bkgd-corr	Roi5-bkgd-corr	Ref_fluo-bkgd-corr
1	0	786404	1.40334e+06	615067	636242	577025	2.64447e+08
2	30	780435	1.47454e+06	601379	644842	607469	2.73713e+08
3	60	786642	1.48109e+06	601423	661424	595267	2.73439e+08
4	90	767773	1.467e+06	594177	647501	611888	2.75091e+08
5	120	793221	1.45087e+06	598298	663462	606860	2.7821e+08
6	150	810327	1.48816e+06	600647	703313	631612	2.81409e+08
7	180	802256	1.51534e+06	574640	666951	603345	2.80455e+08
8	210	442784	654274	267674	304460	357240	2.78443e+08
9	240	492985	774852	286427	335952	392529	2.80217e+08
10	270	511475	812893	302246	333969	404888	2.79021e+08
11	300	521009	896507	297419	336008	405780	2.81657e+08
12	330	496075	839619	309996	314049	405701	2.72326e+08
13	360	511130	853292	329099	331384	421237	2.72212e+08
14	390	496971	810509	358723	333017	409084	2.74153e+08
15	690	534353	961516	360282	373243	448215	2.81431e+08
16	990	540662	1.08463e+06	372250	407524	457706	2.83638e+08
17	1290	529775	800375	318658	397375	455134	2.82575e+08
18	1590	498153	968153	297404	397541	461021	2.85221e+08
19	1890	544082	1.08755e+06	344246	518261	493625	2.88531e+08
20	2190	513150	1.01443e+06	362915	549969	510905	2.85001e+08
21	2490	498671	1.04481e+06	393148	523872	546310	2.90825e+08
22	2790	519094	916546	385183	571804	519993	2.83236e+08
23	3090	475152	888109	428413	545716	538787	2.84466e+08
24	3390	498351	997275	404534	512730	537801	2.80131e+08
25	3690	471091	1.06062e+06	392893	470828	497779	2.72888e+08
26	3990	432690	1.07686e+06	402356	447882	499162	2.77331e+08
27	4290	454401	947343	381911	469170	500434	2.64485e+08
28	4590	505033	1.11759e+06	381941	489087	495814	2.731e+08
		Bleaching Corrected Data
	Time_(sec)	Roi1-bkgd_bleach-corr	Roi2-bkgd_bleach-corr	Roi3-bkgd_bleach-corr	Roi4-bkgd_bleach-corr	Roi5-bkgd_bleach-corr
1	0	0.00297376	0.00530667	0.00232586	0.00240593	0.002182
2	30	0.00285129	0.00538719	0.00219712	0.00235591	0.00221937
3	60	0.00287685	0.00541654	0.00219948	0.00241891	0.00217696
4	90	0.00279098	0.00533277	0.00215993	0.00235377	0.00222431
5	120	0.00285116	0.00521503	0.00215053	0.00238475	0.0021813
6	150	0.00287953	0.00528823	0.00213442	0.00249925	0.00224446
7	180	0.00286055	0.00540316	0.00204895	0.0023781	0.00215131
8	210	0.00159021	0.00234976	0.000961325	0.00109344	0.00128299
9	240	0.0017593	0.00276518	0.00102216	0.0011989	0.0014008
10	270	0.00183311	0.00291338	0.00108324	0.00119693	0.0014511
11	300	0.0018498	0.00318297	0.00105596	0.00119297	0.00144068
12	330	0.00182162	0.00308314	0.00113833	0.00115321	0.00148976
13	360	0.00187769	0.00313466	0.00120898	0.00121737	0.00154746
14	390	0.00181275	0.00295641	0.00130848	0.00121471	0.00149217
15	690	0.0018987	0.00341652	0.00128018	0.00132623	0.00159263
16	990	0.00190617	0.003824	0.00131241	0.00143678	0.0016137
17	1290	0.00187482	0.00283244	0.0011277	0.00140627	0.00161067
18	1590	0.00174655	0.0033944	0.00104271	0.0013938	0.00161637
19	1890	0.00188569	0.00376926	0.0011931	0.0017962	0.00171082
20	2190	0.00180052	0.00355938	0.00127338	0.00192971	0.00179264
21	2490	0.00171468	0.00359258	0.00135184	0.00180133	0.00187848
22	2790	0.00183273	0.00323598	0.00135994	0.00201883	0.0018359
23	3090	0.00167033	0.00312202	0.00150603	0.00191839	0.00189403
24	3390	0.00177899	0.00356003	0.00144409	0.00183032	0.00191982
25	3690	0.00172632	0.00388665	0.00143976	0.00172535	0.00182411
26	3990	0.00156019	0.00388292	0.00145081	0.00161497	0.00179987
27	4290	0.00171806	0.00358184	0.00144398	0.0017739	0.00189211
28	4590	0.00184926	0.00409223	0.00139854	0.00179087	0.0018155
		Normalized Data
	Time_(sec)	Roi1_corr_norm	Roi2_corr_norm	Roi3_corr_norm	Roi4_corr_norm	Roi5_corr_norm
1	0	1	1	1	1	1
2	30	0.958817	1.01517	0.944648	0.979209	1.01712
3	60	0.96741	1.0207	0.945663	1.00539	0.997691
4	90	0.938533	1.00492	0.928659	0.97832	1.01939
5	120	0.958771	0.982731	0.924616	0.991198	0.999679
6	150	0.968312	0.996525	0.917693	1.03879	1.02862
7	180	0.961929	1.01818	0.880946	0.988433	0.985932
8	210	0.534748	0.442793	0.413321	0.454476	0.587988
9	240	0.591606	0.521077	0.439478	0.49831	0.64198
10	270	0.616426	0.549003	0.465737	0.497493	0.665033
11	300	0.622039	0.599805	0.454009	0.495844	0.660258
12	330	0.612565	0.580994	0.489422	0.47932	0.68275
13	360	0.631418	0.590701	0.519799	0.505988	0.709191
14	390	0.609581	0.557112	0.562579	0.504882	0.683855
15	690	0.638483	0.643816	0.550411	0.551235	0.729892
16	990	0.640995	0.720603	0.56427	0.597181	0.739549
17	1290	0.630452	0.533751	0.484852	0.584499	0.73816
18	1590	0.58732	0.639647	0.448313	0.579318	0.740771
19	1890	0.63411	0.710288	0.512971	0.746574	0.78406
20	2190	0.605468	0.670737	0.547488	0.802063	0.821557
21	2490	0.576601	0.676993	0.581221	0.748703	0.860897
22	2790	0.616298	0.609795	0.584703	0.839104	0.841382
23	3090	0.561689	0.58832	0.647514	0.797358	0.868024
24	3390	0.59823	0.67086	0.620885	0.760755	0.879843
25	3690	0.580515	0.732408	0.619022	0.717125	0.83598
26	3990	0.524651	0.731706	0.623776	0.671246	0.824872
27	4290	0.577739	0.67497	0.620838	0.737304	0.867144
28	4590	0.621859	0.771148	0.6013	0.744357	0.832035
		Normalize the bouton fluorescent right after bleaching to 0
	Recovery Time_(sec)
1	0	0	0	0	0	0
2	30	0.132205	0.13913	0.0501784	0.0807469	0.12888
3	60	0.189916	0.188761	0.100553	0.0792422	0.183908
4	90	0.202965	0.279049	0.0780551	0.0762046	0.172511
5	120	0.180937	0.245616	0.145989	0.0457646	0.2262
6	150	0.224774	0.262869	0.204262	0.0948895	0.289316
7	180	0.173998	0.203173	0.286329	0.0928526	0.228836
8	480	0.2412	0.357268	0.262987	0.178239	0.338729
9	780	0.247043	0.493736	0.289573	0.262877	0.361779
10	1080	0.222528	0.161654	0.137222	0.239516	0.358465
11	1380	0.122238	0.349857	0.0671276	0.229972	0.364698
12	1680	0.231034	0.475404	0.191163	0.538073	0.468029
13	1980	0.164436	0.405111	0.257379	0.640289	0.557535
14	2280	0.0973164	0.41623	0.32209	0.541996	0.651441
15	2580	0.189618	0.296803	0.32877	0.708524	0.604859
16	2880	0.0626419	0.258637	0.449263	0.631623	0.668452
17	3180	0.147605	0.405331	0.398179	0.564196	0.696665
18	3480	0.106417	0.514717	0.394605	0.483825	0.591964
19	3780	-0.0234762	0.513469	0.403726	0.399312	0.565449
20	4080	0.0999621	0.412635	0.398089	0.520998	0.666351
21	4380	0.202547	0.583567	0.360609	0.53399	0.582545

## Sheet: WT-0206-C1
		Raw Data
	Time_(sec)	Roi1	Roi2	Roi3	Roi4	Roi5	Ref_fluo	Background
1	0	1643000	1632470	1532612	1525996	1717426	535399847	2.47611e+07
2	30	1.63578e+06	1.6286e+06	1.58269e+06	1.54435e+06	1.71719e+06	5.44953e+08	2.47617e+07
3	60	1.61167e+06	1.66447e+06	1.54283e+06	1.58992e+06	1.78053e+06	5.49008e+08	2.48805e+07
4	90	1.61827e+06	1.61697e+06	1.53454e+06	1.58442e+06	1.72958e+06	5.65253e+08	2.48829e+07
5	120	1.68175e+06	1.62503e+06	1.56519e+06	1.5875e+06	1.82744e+06	5.73755e+08	2.50113e+07
6	150	1.62971e+06	1.63131e+06	1.56052e+06	1.57822e+06	1.76157e+06	5.63085e+08	2.49055e+07
7	180	1.63497e+06	1.63504e+06	1.54791e+06	1.60195e+06	1.76483e+06	5.58783e+08	2.48945e+07
8	210	1.2495e+06	1.07045e+06	1.15203e+06	1.15962e+06	1.13708e+06	5.57022e+08	2.48845e+07
9	240	1.27557e+06	1.109e+06	1.16352e+06	1.18295e+06	1.18052e+06	5.57957e+08	2.48977e+07
10	270	1.29999e+06	1.11789e+06	1.2151e+06	1.18061e+06	1.23874e+06	5.56718e+08	2.49123e+07
11	300	1.31204e+06	1.1051e+06	1.20661e+06	1.18987e+06	1.22893e+06	5.55721e+08	2.49042e+07
12	330	1.31345e+06	1.11025e+06	1.18099e+06	1.18034e+06	1.27923e+06	5.51636e+08	2.48119e+07
13	360	1.30831e+06	1.10595e+06	1.28279e+06	1.18354e+06	1.29746e+06	5.53618e+08	2.48214e+07
14	390	1.27327e+06	1.10198e+06	1.29523e+06	1.18546e+06	1.23707e+06	5.44007e+08	2.47779e+07
15	690	1.32042e+06	1.1303e+06	1.35924e+06	1.30282e+06	1.43186e+06	5.56949e+08	2.48691e+07
16	990	1.3229e+06	1.17312e+06	1.33759e+06	1.28017e+06	1.50947e+06	5.59086e+08	2.48627e+07
17	1290	1.35532e+06	1.20536e+06	1.334e+06	1.32813e+06	1.49769e+06	5.52041e+08	2.47528e+07
18	1590	1.42331e+06	1.21473e+06	1.31077e+06	1.32566e+06	1.52932e+06	5.58113e+08	2.48091e+07
19	1890	1.38875e+06	1.22761e+06	1.45275e+06	1.33094e+06	1.54628e+06	5.60098e+08	2.48979e+07
20	2190	1.41672e+06	1.2091e+06	1.37788e+06	1.35383e+06	1.66713e+06	5.62732e+08	2.48703e+07
21	2490	1.41845e+06	1.18412e+06	1.36417e+06	1.35714e+06	1.65882e+06	5.67384e+08	2.49731e+07
22	2790	1.47041e+06	1.19436e+06	1.39228e+06	1.42384e+06	1.73069e+06	5.81584e+08	2.50975e+07
23	3090	1.41548e+06	1.19638e+06	1.42259e+06	1.37888e+06	1.72736e+06	5.64556e+08	2.49405e+07
24	3390	1.46328e+06	1.2089e+06	1.43097e+06	1.48489e+06	1.78676e+06	5.74754e+08	2.5038e+07
25	3690	1.44325e+06	1.21193e+06	1.56958e+06	1.50534e+06	1.76264e+06	5.74104e+08	2.50516e+07
26	3990	1.47971e+06	1.22684e+06	1.43276e+06	1.50975e+06	1.81767e+06	5.7056e+08	2.50414e+07
27	4290	1.51713e+06	1.24676e+06	1.4144e+06	1.48783e+06	1.73199e+06	5.69075e+08	2.49874e+07
28	4590	1.48563e+06	1.22947e+06	1.5298e+06	1.56119e+06	1.72876e+06	5.65793e+08	2.49823e+07
		Background corrected Data
	Time_(sec)	Roi1-bkgd-corr	Roi2-bkgd-corr	Roi3-bkgd-corr	Roi4-bkgd-corr	Roi5-bkgd-corr	Ref_fluo-bkgd-corr
1	0	694233	683703	583845	577229	768659	2.07669e+08
2	30	686988	679813	633900	595564	768407	2.17215e+08
3	60	658328	711134	589489	636578	827187	2.19697e+08
4	90	664833	663532	581109	630985	776142	2.3591e+08
5	120	723392	666675	606831	629146	869085	2.42711e+08
6	150	675411	677005	606221	623923	807271	2.33443e+08
7	180	681097	681163	594031	648070	810953	2.29287e+08
8	210	296009	116961	198541	206130	183584	2.27658e+08
9	240	321572	155002	209515	228954	226520	2.28418e+08
10	270	345427	163330	260537	226046	284175	2.26986e+08
11	300	357786	150853	252358	235616	274681	2.26096e+08
12	330	362738	159536	230275	229626	328512	2.23232e+08
13	360	357235	154871	331714	232468	346382	2.25089e+08
14	390	323860	152568	345822	236051	287661	2.16053e+08
15	690	367512	177394	406337	349913	478957	2.27789e+08
16	990	370237	220456	384926	327509	556805	2.3001e+08
17	1290	406873	256911	385548	379679	549238	2.2442e+08
18	1590	472706	264131	360171	375053	578711	2.29747e+08
19	1890	434748	273608	498748	376938	592274	2.30557e+08
20	2190	463771	256149	424935	400878	714179	2.33556e+08
21	2490	461562	227229	407282	400254	701933	2.36846e+08
22	2790	508755	232703	430622	462186	769031	2.494e+08
23	3090	459837	240744	466956	423236	771721	2.34451e+08
24	3390	503904	249527	471596	525518	827388	2.43358e+08
25	3690	483354	252029	609680	545448	802739	2.42528e+08
26	3990	520205	267335	473255	550240	858166	2.39119e+08
27	4290	559698	289322	456966	530390	774556	2.3835e+08
28	4590	528388	272227	572562	603953	771521	2.35134e+08
		Bleaching Corrected Data
	Time_(sec)	Roi1-bkgd_bleach-corr	Roi2-bkgd_bleach-corr	Roi3-bkgd_bleach-corr	Roi4-bkgd_bleach-corr	Roi5-bkgd_bleach-corr
1	0	0.00334299	0.00329228	0.00281143	0.00277957	0.00370137
2	30	0.00316272	0.00312968	0.00291831	0.00274183	0.00353755
3	60	0.00299652	0.00323688	0.00268319	0.00289753	0.00376512
4	90	0.00281816	0.00281265	0.00246327	0.00267469	0.00328999
5	120	0.00298046	0.00274678	0.00250022	0.00259216	0.00358073
6	150	0.00289326	0.00290009	0.00259687	0.0026727	0.00345811
7	180	0.0029705	0.00297079	0.00259077	0.00282646	0.00353684
8	210	0.00130023	0.000513759	0.000872103	0.000905438	0.0008064
9	240	0.00140782	0.000678592	0.000917243	0.00100235	0.000991691
10	270	0.0015218	0.000719558	0.00114781	0.000995857	0.00125195
11	300	0.00158245	0.000667209	0.00111615	0.00104211	0.00121489
12	330	0.00162494	0.000714666	0.00103155	0.00102864	0.00147162
13	360	0.00158708	0.000688043	0.0014737	0.00103278	0.00153886
14	390	0.00149898	0.000706157	0.00160063	0.00109256	0.00133143
15	690	0.00161339	0.000778765	0.00178383	0.00153613	0.00210264
16	990	0.00160966	0.000958463	0.00167352	0.00142389	0.00242079
17	1290	0.001813	0.00114478	0.00171798	0.00169182	0.00244737
18	1590	0.00205751	0.00114966	0.00156768	0.00163246	0.00251891
19	1890	0.00188564	0.00118673	0.00216323	0.0016349	0.00256888
20	2190	0.0019857	0.00109673	0.00181942	0.00171641	0.00305785
21	2490	0.00194878	0.000959394	0.00171961	0.00168993	0.00296366
22	2790	0.00203991	0.000933051	0.00172663	0.00185319	0.00308352
23	3090	0.00196134	0.00102684	0.0019917	0.00180522	0.00329161
24	3390	0.00207062	0.00102535	0.00193787	0.00215944	0.00339988
25	3690	0.00199298	0.00103918	0.00251385	0.00224901	0.00330988
26	3990	0.00217551	0.001118	0.00197916	0.00230112	0.00358887
27	4290	0.00234822	0.00121386	0.00191721	0.00222526	0.00324966
28	4590	0.00224718	0.00115775	0.00243504	0.00256855	0.00328119
		Normalized Data
	Time_(sec)	Roi1_corr_norm	Roi2_corr_norm	Roi3_corr_norm	Roi4_corr_norm	Roi5_corr_norm
1	0	1	1	1	1	1
2	30	0.946076	0.950613	1.03802	0.986422	0.95574
3	60	0.896362	0.983173	0.954388	1.04244	1.01722
4	90	0.843008	0.854317	0.876162	0.962267	0.888858
5	120	0.891557	0.83431	0.889305	0.932575	0.967407
6	150	0.865473	0.880877	0.923686	0.961553	0.934278
7	180	0.888576	0.902349	0.921516	1.01687	0.955549
8	210	0.388944	0.15605	0.310199	0.325748	0.217865
9	240	0.421127	0.206116	0.326256	0.360612	0.267925
10	270	0.455221	0.218559	0.408266	0.358278	0.338239
11	300	0.473365	0.202659	0.397005	0.374916	0.328226
12	330	0.486074	0.217073	0.366914	0.370073	0.397587
13	360	0.47475	0.208987	0.524182	0.371562	0.415755
14	390	0.448396	0.214489	0.569331	0.393067	0.359714
15	690	0.482619	0.236543	0.634493	0.55265	0.568069
16	990	0.481504	0.291124	0.595257	0.512271	0.654025
17	1290	0.54233	0.347716	0.61107	0.608664	0.661205
18	1590	0.61547	0.349198	0.557612	0.587306	0.680533
19	1890	0.564059	0.360458	0.769441	0.588185	0.694035
20	2190	0.59399	0.333123	0.647151	0.617511	0.82614
21	2490	0.582947	0.291407	0.611649	0.607983	0.800693
22	2790	0.610208	0.283406	0.614148	0.666718	0.833076
23	3090	0.586703	0.311895	0.708431	0.649463	0.889295
24	3390	0.619394	0.31144	0.689283	0.776898	0.918544
25	3690	0.596169	0.31564	0.894156	0.809123	0.894231
26	3990	0.650769	0.339583	0.703971	0.82787	0.969606
27	4290	0.702432	0.368698	0.681934	0.800578	0.877961
28	4590	0.672207	0.351657	0.866124	0.924081	0.88648
		Normalize the bouton fluorescent right after bleaching to 0
	Recovery Time_(sec)
1	0	0	0	0	0	0
2	30	0.0624323	0.0659601	0.0253614	0.0528032	0.0674663
3	60	0.12857	0.0823533	0.1549	0.0492676	0.16223
4	90	0.163767	0.0614052	0.137113	0.0744676	0.148734
5	120	0.188422	0.0803959	0.0895834	0.0671321	0.242212
6	150	0.166454	0.0697423	0.337993	0.0693875	0.266698
7	180	0.115331	0.0769907	0.409307	0.101957	0.19117
8	480	0.18172	0.106046	0.512234	0.34365	0.471973
9	780	0.179556	0.177954	0.450259	0.282495	0.587817
10	1080	0.297553	0.252511	0.475237	0.428486	0.597494
11	1380	0.439437	0.254464	0.390797	0.396139	0.623541
12	1680	0.339704	0.269298	0.725389	0.39747	0.641739
13	1980	0.397767	0.233286	0.532227	0.441885	0.819777
14	2280	0.376345	0.178327	0.476151	0.427454	0.785482
15	2580	0.429228	0.167786	0.480098	0.516411	0.829125
16	2880	0.383631	0.205318	0.629021	0.490277	0.904892
17	3180	0.447048	0.204719	0.598776	0.683281	0.944312
18	3480	0.401995	0.210253	0.922381	0.732087	0.911544
19	3780	0.507913	0.241796	0.621977	0.760479	1.01313
20	4080	0.608134	0.280153	0.587169	0.719146	0.889617
21	4380	0.5495	0.257703	0.878103	0.906196	0.901098

## Sheet: S540A-1127-C1
		Raw Data
	Time_(sec)	Roi1	Roi2	Roi3	Roi4	Roi5	Ref_fluo	Background
1	0	2841650	2917204	2871358	2612992	2529913	539080802	67546228
2	30	2.86467e+06	2.91825e+06	2.86139e+06	2.599e+06	2.56769e+06	5.40503e+08	6.75931e+07			Filter out due to large abrupt change.
3	60	2.87835e+06	2.90027e+06	2.84386e+06	2.57857e+06	2.56135e+06	5.40457e+08	6.79038e+07
4	90	2.83754e+06	2.87839e+06	2.82819e+06	2.58037e+06	2.56517e+06	5.39833e+08	6.7715e+07
5	120	2.8538e+06	2.80338e+06	2.82231e+06	2.56663e+06	2.53972e+06	5.36119e+08	6.74725e+07
6	150	2.77565e+06	2.88159e+06	2.8015e+06	2.62587e+06	2.57565e+06	5.35568e+08	6.75007e+07
7	180	2.82209e+06	2.9106e+06	2.82833e+06	2.5565e+06	2.55029e+06	5.35543e+08	6.74577e+07
8	210	2.49352e+06	2.40387e+06	2.45642e+06	2.34946e+06	2.26863e+06	5.32804e+08	6.72515e+07
9	240	2.53514e+06	2.52401e+06	2.51248e+06	2.38823e+06	2.3177e+06	5.37398e+08	6.74436e+07
10	270	2.50777e+06	2.51297e+06	2.49998e+06	2.42386e+06	2.30349e+06	5.30097e+08	6.70556e+07
11	300	2.52132e+06	2.49136e+06	2.52235e+06	2.44247e+06	2.3031e+06	5.3185e+08	6.75251e+07
12	330	2.55465e+06	2.53535e+06	2.55774e+06	2.4601e+06	2.31666e+06	5.31645e+08	6.71724e+07
13	360	2.54185e+06	2.52582e+06	2.54299e+06	2.46649e+06	2.31063e+06	5.335e+08	6.7538e+07
14	390	2.58076e+06	2.50673e+06	2.60083e+06	2.4466e+06	2.31573e+06	5.34609e+08	6.74969e+07
15	690	2.54785e+06	2.5703e+06	2.60802e+06	2.51322e+06	2.35552e+06	5.3711e+08	6.74347e+07
16	990	2.57158e+06	2.54729e+06	2.66188e+06	2.50827e+06	2.37466e+06	5.35076e+08	6.72644e+07
17	1290	2.77692e+06	2.56808e+06	2.67239e+06	2.63755e+06	2.39028e+06	5.41513e+08	6.75572e+07
18	1590	2.71001e+06	2.57787e+06	2.66079e+06	2.61607e+06	2.39898e+06	5.37898e+08	6.73875e+07
19	1890	2.72252e+06	2.6207e+06	2.73652e+06	2.69938e+06	2.37922e+06	5.39418e+08	6.76505e+07
20	2190	2.69972e+06	2.59256e+06	2.75833e+06	2.64201e+06	2.4456e+06	5.39182e+08	6.7464e+07
21	2490	2.70794e+06	2.6519e+06	2.75302e+06	2.64157e+06	2.46689e+06	5.36499e+08	6.74537e+07
22	2790	2.78627e+06	2.64059e+06	2.81291e+06	2.64437e+06	2.45861e+06	5.38975e+08	6.73324e+07
23	3090	2.64612e+06	2.64019e+06	2.81275e+06	2.58759e+06	2.47588e+06	5.40041e+08	6.75284e+07
24	3390	2.5871e+06	2.60853e+06	2.82045e+06	2.70636e+06	2.45146e+06	5.34508e+08	6.73215e+07
25	3690	2.59576e+06	2.75359e+06	2.8365e+06	2.62033e+06	2.46278e+06	5.3612e+08	6.71974e+07
26	3990	2.7128e+06	2.76753e+06	2.79014e+06	2.60921e+06	2.49852e+06	5.3885e+08	6.7612e+07
27	4290	2.77379e+06	2.79597e+06	2.76836e+06	2.61486e+06	2.49848e+06	5.34854e+08	6.71966e+07
28	4590	2.70033e+06	2.57161e+06	2.81975e+06	2.63357e+06	2.56068e+06	5.385e+08	6.73699e+07
		Background corrected Data
	Time_(sec)	Roi1-bkgd-corr	Roi2-bkgd-corr	Roi3-bkgd-corr	Roi4-bkgd-corr	Roi5-bkgd-corr	Ref_fluo-bkgd-corr
1	0	563111	638665	592819	334453	251374	1.02215e+08
2	30	584546	638128	581270	318878	287566	1.03335e+08
3	60	587746	609667	553260	287971	270746	1.01279e+08
4	90	553310	594153	543955	296142	280935	1.01876e+08
5	120	577748	527328	546261	290578	263671	9.97302e+07
6	150	498643	604583	524492	348867	298648	9.89968e+07
7	180	546536	635045	552775	280942	274737	9.92497e+07
8	210	224924	135274	187820	80861.5	29.8403	9.78451e+07
9	240	260062	248929	237400	113149	42624.6	1.01196e+08
10	270	245786	250984	237994	161866	41496.3	9.64046e+07
11	300	243493	213531	244520	164646	25275.9	9.51214e+07
12	330	288724	269425	291811	194171	50726.3	9.71975e+07
13	360	263582	247556	264725	188230	32362.5	9.66873e+07
14	390	303884	229853	323950	169722	38857.2	9.80628e+07
15	690	273070	295521	333247	238438	80738.5	1.00965e+08
16	990	302546	278254	392845	239235	105625	1.00033e+08
17	1290	498011	289171	393483	358645	111372	1.04577e+08
18	1590	436825	304687	387606	342884	125792	1.02059e+08
19	1890	440466	338640	454460	417328	97166.9	1.01878e+08
20	2190	423955	316791	482560	366241	169838	1.02849e+08
21	2490	432524	376481	477605	366152	191469	1.00232e+08
22	2790	514942	369266	541588	373042	187282	1.03493e+08
23	3090	368183	362253	534807	309648	197941	1.03291e+08
24	3390	316139	337568	549496	435407	180503	9.9096e+07
25	3690	328991	486816	569729	353555	196005	1.01511e+08
26	3990	432042	486777	509380	328449	217763	1.0156e+08
27	4290	507042	529228	501614	348116	231738	1.0025e+08
28	4590	427741	299017	547157	360976	288091	1.02775e+08
		Bleaching Corrected Data
	Time_(sec)	Roi1-bkgd_bleach-corr	Roi2-bkgd_bleach-corr	Roi3-bkgd_bleach-corr	Roi4-bkgd_bleach-corr	Roi5-bkgd_bleach-corr
1	0	0.00550906	0.00624822	0.0057997	0.00327204	0.00245926
2	30	0.00565683	0.00617536	0.00562513	0.00308588	0.00278287
3	60	0.00580324	0.00601969	0.00546274	0.00284335	0.00267327
4	90	0.00543122	0.00583213	0.0053394	0.00290689	0.00275762
5	120	0.0057931	0.00528755	0.00547739	0.00291364	0.00264385
6	150	0.00503696	0.0061071	0.00529807	0.00352402	0.00301674
7	180	0.00550667	0.00639845	0.00556953	0.00283066	0.00276814
8	210	0.00229878	0.00138253	0.00191956	0.000826424	3.05e-07
9	240	0.00256987	0.00245985	0.00234594	0.00111811	0.000421207
10	270	0.00254952	0.00260344	0.0024687	0.00167903	0.000430439
11	300	0.00255982	0.00224482	0.00257061	0.0017309	0.000265722
12	330	0.00297049	0.00277194	0.00300225	0.0019977	0.000521889
13	360	0.00272613	0.00256038	0.00273795	0.00194679	0.000334713
14	390	0.00309887	0.00234394	0.00330349	0.00173074	0.000396248
15	690	0.00270459	0.00292696	0.00330061	0.00236158	0.000799665
16	990	0.00302445	0.00278161	0.00392714	0.00239155	0.0010559
17	1290	0.00476216	0.00276516	0.00376263	0.00342949	0.00106498
18	1590	0.00428013	0.0029854	0.00379787	0.00335967	0.00123254
19	1890	0.00432346	0.00332397	0.00446082	0.00409634	0.000953756
20	2190	0.00412213	0.00308017	0.00469194	0.00356097	0.00165134
21	2490	0.00431522	0.00375609	0.00476498	0.00365304	0.00191025
22	2790	0.00497563	0.00356803	0.00523309	0.00360451	0.00180961
23	3090	0.00356452	0.00350711	0.00517769	0.00299782	0.00191635
24	3390	0.00319023	0.00340648	0.00554508	0.00439379	0.0018215
25	3690	0.00324093	0.00479569	0.00561247	0.00348291	0.00193087
26	3990	0.00425407	0.00479302	0.00501557	0.00323405	0.00214419
27	4290	0.00505777	0.00527908	0.00500363	0.00347248	0.0023116
28	4590	0.00416192	0.00290943	0.00532384	0.00351229	0.00280313
		Normalized Data
	Time_(sec)	Roi1_corr_norm	Roi2_corr_norm	Roi3_corr_norm	Roi4_corr_norm	Roi5_corr_norm
1	0	1	1	1	1	1
2	30	1.02682	0.988338	0.9699	0.943107	1.13159
3	60	1.0534	0.963423	0.9419	0.868983	1.08702
4	90	0.98587	0.933407	0.920633	0.888403	1.12132
5	120	1.05156	0.846248	0.944426	0.890465	1.07506
6	150	0.914305	0.977413	0.913507	1.07701	1.22669
7	180	0.999566	1.02404	0.960314	0.865105	1.1256
8	210	0.417272	0.221267	0.330976	0.252572	0.000124011
9	240	0.466481	0.393689	0.404493	0.341717	0.171274
10	270	0.462787	0.416669	0.42566	0.513145	0.175028
11	300	0.464656	0.359274	0.443232	0.528998	0.10805
12	330	0.539201	0.443636	0.517655	0.610537	0.212214
13	360	0.494845	0.409777	0.472085	0.594978	0.136104
14	390	0.562504	0.375136	0.569597	0.52895	0.161125
15	690	0.490935	0.468447	0.569099	0.721746	0.325166
16	990	0.548996	0.445184	0.677129	0.730906	0.429358
17	1290	0.864424	0.442552	0.648763	1.04812	0.43305
18	1590	0.776926	0.4778	0.654838	1.02678	0.501185
19	1890	0.78479	0.531986	0.769147	1.25192	0.387823
20	2190	0.748245	0.492967	0.808998	1.0883	0.671481
21	2490	0.783295	0.601145	0.821591	1.11644	0.776761
22	2790	0.903172	0.571048	0.902303	1.10161	0.735836
23	3090	0.647029	0.561298	0.892751	0.916194	0.779239
24	3390	0.579089	0.545191	0.956098	1.34283	0.740672
25	3690	0.58829	0.767528	0.967717	1.06445	0.785146
26	3990	0.772196	0.7671	0.864798	0.98839	0.871886
27	4290	0.918083	0.844893	0.862739	1.06126	0.939961
28	4590	0.755468	0.465642	0.91795	1.07343	1.13983
		Normalize the bouton fluorescent right after bleaching to 0
	Recovery Time_(sec)
1	0	0	0	0	0	0
2	30	0.0837984	0.232822	0.118744	0.130957	0.15426
3	60	0.0775076	0.263852	0.152934	0.382788	0.157644
4	90	0.0806904	0.186351	0.181315	0.406077	0.0972754
5	120	0.207633	0.300266	0.301523	0.525859	0.19116
6	150	0.132099	0.254546	0.227918	0.503003	0.122561
7	180	0.247315	0.20777	0.38542	0.406007	0.145113
8	480	0.12544	0.333768	0.384615	0.689229	0.292965
9	780	0.224314	0.302357	0.559103	0.702685	0.386876
10	1080	0.761457	0.298802	0.513287	1.16868	0.390204
11	1380	0.612457	0.346399	0.5231	1.13733	0.451615
12	1680	0.625849	0.419566	0.70773	1.46807	0.34944
13	1980	0.563616	0.366879	0.772097	1.22771	0.605106
14	2280	0.623302	0.512952	0.792438	1.26904	0.699996
15	2580	0.827442	0.472311	0.922804	1.24726	0.66311
16	2880	0.391255	0.459146	0.907374	0.974877	0.702229
17	3180	0.275558	0.437397	1.00969	1.60161	0.667468
18	3480	0.291228	0.73762	1.02846	1.19266	0.707553
19	3780	0.604402	0.737043	0.862226	1.08093	0.785734
20	4080	0.852834	0.842087	0.858901	1.18798	0.847091
21	4380	0.575915	0.329981	0.948077	1.20585	1.02723

## Sheet: S540A-1129-C1
		Raw Data
	Time_(sec)	Roi1	Roi2	Roi3	Roi4	Roi5	Ref_fluo	Background
1	0	1347842	1230002	1344248	1194199	1197384	556467242	29717447
2	30	1.43042e+06	1.23445e+06	1.37837e+06	1.21008e+06	1.12504e+06	5.63346e+08	2.9834e+07			Filter out due to large abrupt change.
3	60	1.37961e+06	1.22903e+06	1.39087e+06	1.21811e+06	1.12645e+06	5.62754e+08	2.98422e+07
4	90	1.38371e+06	1.2333e+06	1.3579e+06	1.21176e+06	1.17697e+06	5.61273e+08	2.97294e+07
5	120	1.37686e+06	1.21086e+06	1.34672e+06	1.20002e+06	1.13206e+06	5.60535e+08	2.98024e+07
6	150	1.37658e+06	1.2369e+06	1.34878e+06	1.19121e+06	1.16371e+06	5.58871e+08	2.97436e+07
7	180	1.35607e+06	1.19241e+06	1.32319e+06	1.19363e+06	1.17353e+06	5.58794e+08	2.97355e+07
8	210	990745	999356	1.01034e+06	957909	1.03123e+06	5.56358e+08	2.96923e+07
9	240	1.03136e+06	1.02276e+06	1.02605e+06	984735	1.05171e+06	5.59378e+08	2.97599e+07
10	270	1.04508e+06	1.01707e+06	1.03422e+06	991984	1.04274e+06	5.59385e+08	2.97421e+07
11	300	1.04521e+06	1.027e+06	1.05472e+06	993797	1.01141e+06	5.58476e+08	2.97745e+07
12	330	1.0437e+06	1.00706e+06	1.04337e+06	998217	1.03745e+06	5.57277e+08	2.96708e+07
13	360	1.05953e+06	1.01627e+06	1.05759e+06	1.00306e+06	1.09488e+06	5.58739e+08	2.97528e+07
14	390	1.06173e+06	1.01516e+06	1.05387e+06	1.00007e+06	1.08414e+06	5.56737e+08	2.97383e+07
15	690	1.11666e+06	1.0732e+06	1.11214e+06	1.01725e+06	1.11002e+06	5.5944e+08	2.97569e+07
16	990	1.19672e+06	1.0926e+06	1.13028e+06	1.0485e+06	1.1322e+06	5.62604e+08	2.98014e+07
17	1290	1.2495e+06	1.07504e+06	1.14859e+06	1.04315e+06	1.10766e+06	5.61958e+08	2.97043e+07
18	1590	1.24092e+06	1.05891e+06	1.15956e+06	1.05008e+06	1.15569e+06	5.64484e+08	2.98236e+07
19	1890	1.25798e+06	1.09284e+06	1.21607e+06	1.05151e+06	1.16316e+06	5.62539e+08	2.97728e+07
20	2190	1.26916e+06	1.0615e+06	1.22598e+06	1.04497e+06	1.15142e+06	5.62131e+08	2.9777e+07
21	2490	1.23592e+06	1.08817e+06	1.24572e+06	1.08284e+06	1.27749e+06	5.60465e+08	2.9728e+07
22	2790	1.25704e+06	1.08952e+06	1.21133e+06	1.06057e+06	1.14569e+06	5.59576e+08	2.97054e+07
23	3090	1.26268e+06	1.07362e+06	1.26461e+06	1.07022e+06	1.18033e+06	5.62731e+08	2.97875e+07
24	3390	1.27268e+06	1.07427e+06	1.22534e+06	1.08241e+06	1.1951e+06	5.61462e+08	2.97747e+07
25	3690	1.24088e+06	1.05244e+06	1.24018e+06	1.0669e+06	1.26403e+06	5.61987e+08	2.97249e+07
26	3990	1.23298e+06	1.05771e+06	1.18829e+06	1.06958e+06	1.29918e+06	5.61572e+08	2.972e+07
27	4290	1.2586e+06	1.04657e+06	1.18346e+06	1.07773e+06	1.19465e+06	5.60504e+08	2.97363e+07
28	4590	1.29044e+06	1.03363e+06	1.20511e+06	1.08426e+06	1.22848e+06	5.63317e+08	2.98059e+07
		Background corrected Data
	Time_(sec)	Roi1-bkgd-corr	Roi2-bkgd-corr	Roi3-bkgd-corr	Roi4-bkgd-corr	Roi5-bkgd-corr	Ref_fluo-bkgd-corr
1	0	479047	361207	475453	325404	328589	8.22137e+07
2	30	558213	362251	506165	337879	252832	8.72317e+07
3	60	507167	356588	518423	345663	254004	8.65092e+07
4	90	514564	364161	488762	342619	307828	8.68296e+07
5	120	505579	339577	475443	328741	260780	8.49256e+07
6	150	507024	367342	479216	321645	294152	8.41992e+07
7	180	486750	323092	453872	324312	304213	8.42531e+07
8	210	122685	131295	142280	89849	163168	8.25055e+07
9	240	161326	152722	156019	114700	181679	8.44478e+07
10	270	175560	147556	164698	122467	173222	8.47375e+07
11	300	174747	156540	184254	123335	140951	8.33127e+07
12	330	176270	139627	175937	130785	170021	8.37674e+07
13	360	189701	146438	187765	133227	225052	8.39208e+07
14	390	192326	145755	184462	130659	214731	8.21502e+07
15	690	246714	203254	242196	147302	240077	8.45573e+07
16	990	325473	221345	259033	177249	260952	8.701e+07
17	1290	381085	206629	280181	174738	239252	8.79134e+07
18	1590	369024	187005	287657	178178	283794	8.85355e+07
19	1890	387567	222429	345655	181094	292751	8.74025e+07
20	2190	398627	190969	355446	174439	280888	8.69277e+07
21	2490	366815	219062	376615	213733	408391	8.60436e+07
22	2790	388593	221080	342888	192125	277249	8.5515e+07
23	3090	391840	202774	393768	199382	309487	8.73604e+07
24	3390	402211	203798	354877	211946	324627	8.62955e+07
25	3690	371869	183427	371170	197881	395014	8.76138e+07
26	3990	364109	188842	319416	200713	430308	8.72777e+07
27	4290	389251	177220	314109	208384	325301	8.595e+07
28	4590	419057	162252	333726	212880	357097	8.76527e+07
		Bleaching Corrected Data
	Time_(sec)	Roi1-bkgd_bleach-corr	Roi2-bkgd_bleach-corr	Roi3-bkgd_bleach-corr	Roi4-bkgd_bleach-corr	Roi5-bkgd_bleach-corr
1	0	0.00582685	0.00439351	0.00578313	0.00395803	0.00399677
2	30	0.00639919	0.00415274	0.00580253	0.00387335	0.0028984
3	60	0.00586258	0.00412197	0.0059927	0.00399568	0.00293615
4	90	0.00592613	0.00419397	0.00562897	0.00394587	0.0035452
5	120	0.0059532	0.00399853	0.00559835	0.00387092	0.00307069
6	150	0.00602172	0.00436277	0.00569145	0.00382005	0.00349352
7	180	0.00577724	0.00383478	0.00538701	0.00384925	0.0036107
8	210	0.00148699	0.00159135	0.00172449	0.00108901	0.00197766
9	240	0.00191036	0.00180848	0.00184752	0.00135824	0.00215138
10	270	0.00207181	0.00174133	0.00194363	0.00144525	0.00204421
11	300	0.00209749	0.00187894	0.0022116	0.00148038	0.00169183
12	330	0.00210428	0.00166684	0.0021003	0.00156128	0.00202968
13	360	0.00226047	0.00174496	0.00223741	0.00158753	0.00268172
14	390	0.00234115	0.00177424	0.00224542	0.00159049	0.00261388
15	690	0.00291771	0.00240374	0.00286429	0.00174204	0.00283922
16	990	0.00374064	0.0025439	0.00297704	0.00203711	0.00299911
17	1290	0.00433478	0.00235038	0.00318701	0.00198762	0.00272146
18	1590	0.00416809	0.00211221	0.00324905	0.0020125	0.00320543
19	1890	0.00443428	0.00254488	0.00395475	0.00207195	0.00334946
20	2190	0.00458573	0.00219687	0.00408898	0.00200671	0.00323129
21	2490	0.00426314	0.00254594	0.00437703	0.00248401	0.00474633
22	2790	0.00454416	0.00258528	0.00400968	0.00224668	0.00324211
23	3090	0.00448533	0.00232112	0.00450739	0.0022823	0.00354265
24	3390	0.00466086	0.00236162	0.00411235	0.00245604	0.00376181
25	3690	0.00424441	0.00209358	0.00423643	0.00225857	0.00450858
26	3990	0.00417184	0.00216369	0.00365977	0.00229971	0.00493033
27	4290	0.00452881	0.0020619	0.00365456	0.00242448	0.00378478
28	4590	0.00478088	0.00185108	0.00380737	0.00242867	0.004074
		Normalized Data
	Time_(sec)	Roi1_corr_norm	Roi2_corr_norm	Roi3_corr_norm	Roi4_corr_norm	Roi5_corr_norm
1	0	1	1	1	1	1
2	30	1.09823	0.945198	1.00335	0.978607	0.725186
3	60	1.00613	0.938194	1.03624	1.00951	0.734632
4	90	1.01704	0.954583	0.973343	0.99693	0.887017
5	120	1.02168	0.910099	0.968048	0.977994	0.768295
6	150	1.03344	0.993003	0.984146	0.96514	0.874088
7	180	0.991485	0.872829	0.931504	0.972519	0.903406
8	210	0.255196	0.362206	0.298193	0.275139	0.494816
9	240	0.327855	0.411626	0.319468	0.34316	0.53828
10	270	0.355562	0.39634	0.336086	0.365145	0.511467
11	300	0.35997	0.427664	0.382422	0.37402	0.423299
12	330	0.361135	0.379387	0.363178	0.39446	0.50783
13	360	0.38794	0.397167	0.386886	0.401091	0.670973
14	390	0.401787	0.403833	0.388271	0.401839	0.654
15	690	0.500735	0.547111	0.495283	0.440129	0.710379
16	990	0.641966	0.579012	0.51478	0.514679	0.750383
17	1290	0.743932	0.534965	0.551086	0.502174	0.680915
18	1590	0.715325	0.480756	0.561815	0.508461	0.802005
19	1890	0.761008	0.579236	0.683842	0.523481	0.838042
20	2190	0.787	0.500026	0.707053	0.506998	0.808476
21	2490	0.731637	0.579478	0.756861	0.627589	1.18754
22	2790	0.779865	0.588432	0.693341	0.567627	0.811183
23	3090	0.769769	0.528307	0.779403	0.576625	0.886379
24	3390	0.799893	0.537526	0.711093	0.620523	0.941214
25	3690	0.728423	0.476517	0.732549	0.570629	1.12806
26	3990	0.715969	0.492474	0.632835	0.581024	1.23358
27	4290	0.777231	0.469305	0.631934	0.612548	0.94696
28	4590	0.820491	0.421321	0.658357	0.613608	1.01932
		Normalize the bouton fluorescent right after bleaching to 0
	Recovery Time_(sec)
1	0	0	0	0	0	0
2	30	0.0945096	0.0848222	0.0309653	0.095714	0.125261
3	60	0.130549	0.0585868	0.0551534	0.126648	0.0479877
4	90	0.136282	0.112348	0.122597	0.139137	-0.206109
5	120	0.137797	0.0294899	0.094586	0.167899	0.0375071
6	150	0.172664	0.060006	0.129094	0.177229	0.507677
7	180	0.190674	0.0714462	0.13111	0.178281	0.45876
8	480	0.319378	0.317359	0.286867	0.232159	0.621241
9	780	0.503079	0.372113	0.315247	0.33706	0.736531
10	1080	0.635708	0.296512	0.368091	0.319464	0.536327
11	1380	0.598499	0.203472	0.383707	0.32831	0.885303
12	1680	0.65792	0.372497	0.561319	0.349445	0.989159
13	1980	0.691728	0.236546	0.595103	0.326252	0.903951
14	2280	0.619715	0.372912	0.6676	0.495936	1.9964
15	2580	0.682448	0.38828	0.575145	0.411563	0.911755
16	2880	0.669316	0.285086	0.700411	0.424225	1.12846
17	3180	0.708498	0.300907	0.600984	0.485993	1.2865
18	3480	0.615535	0.196196	0.632213	0.415788	1.82497
19	3780	0.599336	0.223585	0.487078	0.430415	2.12908
20	4080	0.679021	0.183818	0.485767	0.474772	1.30306
21	4380	0.73529	0.101461	0.524225	0.476263	1.5116

## Sheet: S540A-1130-C1
		Raw Data
	Time_(sec)	Roi1	Roi2	Roi3	Roi4	Roi5	Ref_fluo	Background
1	0	1365236	1226162	2089692	1577891	1682714	295818934	28162238
2	30	1.42504e+06	1.24811e+06	2.31453e+06	1.73434e+06	1.72375e+06	3.0053e+08	2.82012e+07
3	60	1.4267e+06	1.26855e+06	2.36762e+06	1.75662e+06	1.76553e+06	3.02849e+08	2.82819e+07
4	90	1.40829e+06	1.26712e+06	2.38251e+06	1.72073e+06	1.74679e+06	3.0232e+08	2.83011e+07
5	120	1.41618e+06	1.25911e+06	2.42811e+06	1.688e+06	1.75337e+06	3.02676e+08	2.8281e+07
6	150	1.41457e+06	1.2637e+06	2.44961e+06	1.72594e+06	1.74777e+06	3.03045e+08	2.83247e+07
7	180	1.41447e+06	1.25009e+06	2.3837e+06	1.73985e+06	1.72238e+06	3.01916e+08	2.82339e+07
8	210	977001	937250	1.38786e+06	1.09712e+06	1.02552e+06	3.00759e+08	2.82112e+07
9	240	1.01291e+06	971851	1.53761e+06	1.14174e+06	1.09957e+06	3.02275e+08	2.82611e+07
10	270	1.02032e+06	977693	1.57718e+06	1.1529e+06	1.09564e+06	3.02006e+08	2.82787e+07
11	300	1.02292e+06	970926	1.63164e+06	1.1727e+06	1.10623e+06	3.02713e+08	2.82623e+07
12	330	1.03088e+06	979123	1.64351e+06	1.19147e+06	1.12089e+06	3.01751e+08	2.83296e+07
13	360	1.03509e+06	989383	1.64747e+06	1.18308e+06	1.12147e+06	3.01565e+08	2.82674e+07
14	390	1.02662e+06	975479	1.6681e+06	1.18553e+06	1.12817e+06	3.02267e+08	2.82821e+07
15	690	1.04264e+06	998448	1.73789e+06	1.2094e+06	1.17363e+06	3.04103e+08	2.82946e+07
16	990	1.03268e+06	997263	1.77972e+06	1.23138e+06	1.20002e+06	3.03938e+08	2.88828e+07
17	1290	1.06021e+06	1.02397e+06	1.92305e+06	1.25232e+06	1.22811e+06	3.07954e+08	2.83884e+07
18	1590	1.05859e+06	1.00856e+06	1.79749e+06	1.25018e+06	1.22966e+06	3.04945e+08	2.83189e+07
19	1890	1.06696e+06	1.02267e+06	2.00337e+06	1.28128e+06	1.21998e+06	3.05662e+08	2.83386e+07
20	2190	1.07586e+06	1.02751e+06	1.85746e+06	1.31566e+06	1.27442e+06	3.05277e+08	2.8261e+07
21	2490	1.08004e+06	1.02306e+06	1.98704e+06	1.31762e+06	1.32328e+06	3.06848e+08	2.82868e+07
22	2790	1.08585e+06	1.019e+06	2.00344e+06	1.35215e+06	1.29625e+06	3.05425e+08	2.82981e+07
23	3090	1.08409e+06	1.02776e+06	1.94113e+06	1.35823e+06	1.33413e+06	3.05338e+08	2.83669e+07
24	3390	1.08325e+06	1.03362e+06	1.92671e+06	1.38522e+06	1.35845e+06	3.05749e+08	2.86987e+07
25	3690	1.09692e+06	1.01252e+06	2.11418e+06	1.37874e+06	1.3512e+06	3.04999e+08	2.82561e+07
26	3990	1.10058e+06	1.01699e+06	2.17537e+06	1.3247e+06	1.40713e+06	3.06215e+08	2.83817e+07
27	4290	1.10193e+06	1.02999e+06	1.97278e+06	1.38285e+06	1.39067e+06	3.06784e+08	2.87404e+07
28	4590	1.11303e+06	1.02862e+06	1.97263e+06	1.3987e+06	1.36245e+06	3.06168e+08	2.86287e+07
		Background corrected Data
	Time_(sec)	Roi1-bkgd-corr	Roi2-bkgd-corr	Roi3-bkgd-corr	Roi4-bkgd-corr	Roi5-bkgd-corr	Ref_fluo-bkgd-corr
1	0	482704	343630	1.20716e+06	695359	800182	4.31389e+07
2	30	541283	364354	1.43077e+06	850583	839999	4.75003e+07
3	60	540417	382271	1.48134e+06	870338	879249	4.90959e+07
4	90	521401	380236	1.49563e+06	833843	859906	4.83943e+07
5	120	529922	372861	1.54186e+06	801746	867114	4.8931e+07
6	150	526948	376073	1.56198e+06	838312	860150	4.89065e+07
7	180	529693	365310	1.49892e+06	855072	837605	4.85931e+07
8	210	92935.3	53184.1	503796	213051	141456	4.764e+07
9	240	127276	86221.1	651977	256108	213943	4.87082e+07
10	270	134137	91510.2	690999	266718	209459	4.82809e+07
11	300	137252	85257.8	745972	287028	220564	4.91354e+07
12	330	143102	91347.9	755737	303697	233114	4.75701e+07
13	360	149259	103555	761641	297254	235646	4.79416e+07
14	390	140336	89190.9	781811	299244	241879	4.85113e+07
15	690	155956	111768	851213	322722	286954	5.02351e+07
16	990	127565	92148.1	874607	326265	294908	4.47923e+07
17	1290	170594	134347	1.03343e+06	362702	338496	5.32446e+07
18	1590	171144	121114	910051	362733	342220	5.08592e+07
19	1890	178898	134608	1.11531e+06	393222	331923	5.13994e+07
20	2190	190236	141879	971833	430031	388797	5.17102e+07
21	2490	193605	136628	1.10061e+06	431185	436846	5.30499e+07
22	2790	199059	132206	1.11665e+06	465361	409458	5.15264e+07
23	3090	195145	138817	1.05218e+06	469282	445185	5.08215e+07
24	3390	183909	134278	1.02737e+06	485875	459108	4.82561e+07
25	3690	211444	127043	1.22871e+06	493272	465732	5.14774e+07
26	3990	211172	127581	1.28596e+06	435287	517715	5.15652e+07
27	4290	201278	129335	1.07212e+06	482197	490018	4.89161e+07
28	4590	215877	131466	1.07548e+06	501545	465296	4.93022e+07
		Bleaching Corrected Data
	Time_(sec)	Roi1-bkgd_bleach-corr	Roi2-bkgd_bleach-corr	Roi3-bkgd_bleach-corr	Roi4-bkgd_bleach-corr	Roi5-bkgd_bleach-corr
1	0	0.0111895	0.00796566	0.0279831	0.0161191	0.018549
2	30	0.0113954	0.00767056	0.0301213	0.0179069	0.0176841
3	60	0.0110074	0.00778622	0.0301723	0.0177273	0.0179088
4	90	0.010774	0.00785704	0.030905	0.0172302	0.0177687
5	120	0.01083	0.00762015	0.0315108	0.0163852	0.0177212
6	150	0.0107746	0.00768963	0.0319381	0.0171411	0.0175876
7	180	0.0109006	0.00751774	0.0308464	0.0175966	0.0172371
8	210	0.00195078	0.00111637	0.010575	0.0044721	0.00296927
9	240	0.00261302	0.00177016	0.0133854	0.00525801	0.00439234
10	270	0.00277825	0.00189537	0.014312	0.0055243	0.00433834
11	300	0.00279335	0.00173516	0.015182	0.00584156	0.0044889
12	330	0.00300824	0.00192028	0.0158868	0.0063842	0.00490042
13	360	0.00311335	0.00216003	0.0158869	0.00620035	0.00491528
14	390	0.00289284	0.00183856	0.0161161	0.00616854	0.00498603
15	690	0.00310452	0.0022249	0.0169446	0.00642423	0.00571222
16	990	0.00284792	0.00205723	0.0195258	0.00728397	0.00658392
17	1290	0.00320397	0.0025232	0.0194091	0.00681198	0.00635737
18	1590	0.00336506	0.00238135	0.0178935	0.00713211	0.00672877
19	1890	0.00348054	0.00261887	0.0216989	0.00765032	0.00645772
20	2190	0.00367888	0.00274374	0.0187938	0.00831617	0.00751876
21	2490	0.0036495	0.00257547	0.0207466	0.00812791	0.00823462
22	2790	0.00386323	0.00256579	0.0216715	0.0090315	0.00794657
23	3090	0.00383981	0.00273147	0.0207034	0.00923393	0.00875978
24	3390	0.0038111	0.00278261	0.0212899	0.0100687	0.00951399
25	3690	0.0041075	0.00246793	0.0238689	0.0095823	0.0090473
26	3990	0.00409524	0.00247416	0.0249386	0.00844149	0.01004
27	4290	0.00411477	0.00264402	0.0219176	0.00985763	0.0100175
28	4590	0.00437865	0.00266653	0.021814	0.0101729	0.00943764
		Normalized Data
	Time_(sec)	Roi1_corr_norm	Roi2_corr_norm	Roi3_corr_norm	Roi4_corr_norm	Roi5_corr_norm
1	0	1	1	1	1	1
2	30	1.0184	0.962953	1.07641	1.11091	0.953373
3	60	0.983722	0.977473	1.07823	1.09977	0.965489
4	90	0.962867	0.986364	1.10442	1.06893	0.957937
5	120	0.967869	0.956625	1.12607	1.01651	0.955373
6	150	0.962919	0.965347	1.14133	1.06341	0.948173
7	180	0.974177	0.943769	1.10232	1.09166	0.929277
8	210	0.17434	0.140149	0.377908	0.277441	0.160078
9	240	0.233524	0.222224	0.478338	0.326198	0.236797
10	270	0.248291	0.237943	0.511453	0.342718	0.233886
11	300	0.249639	0.21783	0.542541	0.362401	0.242003
12	330	0.268844	0.24107	0.567729	0.396065	0.264189
13	360	0.278237	0.271168	0.567731	0.384659	0.264989
14	390	0.258531	0.230811	0.575921	0.382686	0.268804
15	690	0.277449	0.279312	0.605529	0.398549	0.307953
16	990	0.254517	0.258263	0.697773	0.451885	0.354948
17	1290	0.286337	0.31676	0.693602	0.422604	0.342734
18	1590	0.300733	0.298953	0.639441	0.442464	0.362757
19	1890	0.311054	0.32877	0.77543	0.474613	0.348144
20	2190	0.328779	0.344445	0.671614	0.515921	0.405346
21	2490	0.326153	0.323321	0.741399	0.504242	0.443939
22	2790	0.345254	0.322106	0.774448	0.560299	0.42841
23	3090	0.343161	0.342906	0.739855	0.572858	0.472252
24	3390	0.340596	0.349326	0.760814	0.624645	0.512912
25	3690	0.367084	0.309821	0.852976	0.59447	0.487752
26	3990	0.365989	0.310604	0.891202	0.523696	0.54127
27	4290	0.367734	0.331927	0.783245	0.611551	0.540058
28	4590	0.391317	0.334753	0.77954	0.631108	0.508796
		Normalize the bouton fluorescent right after bleaching to 0
	Recovery Time_(sec)
1	0	0	0	0	0	0
2	30	0.0733311	0.0988602	0.141069	0.0619515	0.0960867
3	60	0.0916274	0.117794	0.187585	0.0829425	0.0924407
4	90	0.0932983	0.0935681	0.231252	0.107951	0.102606
5	120	0.117094	0.121561	0.266632	0.150726	0.130393
6	150	0.128732	0.157814	0.266635	0.136233	0.131396
7	180	0.104316	0.109203	0.278139	0.133726	0.136173
8	480	0.127756	0.167624	0.319728	0.153882	0.185206
9	780	0.099342	0.14227	0.449299	0.221652	0.244064
10	1080	0.138767	0.21273	0.44344	0.184447	0.228767
11	1380	0.156605	0.191281	0.367363	0.209681	0.253844
12	1680	0.169393	0.227196	0.55838	0.250531	0.235543
13	1980	0.191355	0.246078	0.412555	0.303018	0.307185
14	2280	0.188101	0.220633	0.510578	0.288178	0.355521
15	2580	0.211769	0.21917	0.557002	0.359406	0.336071
16	2880	0.209175	0.244223	0.50841	0.375362	0.39098
17	3180	0.205996	0.251957	0.537851	0.441164	0.441905
18	3480	0.238817	0.204372	0.667306	0.402823	0.410394
19	3780	0.237459	0.205315	0.721	0.312896	0.477421
20	4080	0.239622	0.231	0.569359	0.424527	0.475904
21	4380	0.268841	0.234403	0.564154	0.449376	0.43675

## Sheet: S540A-1202-C2
		Raw Data
	Time_(sec)	Roi1	Roi2	Roi3	Roi4	Roi5	Ref_fluo	Background
1	0	2765054	2067460	1828962	2451093	2711604	601718129	38103693
2	30	2.7641e+06	2.04232e+06	1.82513e+06	2.46706e+06	2.70962e+06	6.03542e+08	3.81435e+07			Filter out due to large abrupt change.
3	60	2.70213e+06	2.0597e+06	1.85901e+06	2.59672e+06	2.66257e+06	6.04094e+08	3.80778e+07
4	90	2.73505e+06	2.09949e+06	1.83745e+06	2.54845e+06	2.70242e+06	6.03652e+08	3.81547e+07
5	120	2.70519e+06	2.03384e+06	1.83631e+06	2.55791e+06	2.70877e+06	6.02916e+08	3.82288e+07
6	150	2.69223e+06	2.04995e+06	1.8185e+06	2.46129e+06	2.64829e+06	6.02318e+08	3.82418e+07
7	180	2.75308e+06	2.05193e+06	1.85064e+06	2.4536e+06	2.67309e+06	6.01574e+08	3.81607e+07
8	210	1.83193e+06	1.62445e+06	1.68538e+06	1.80339e+06	1.94918e+06	6.0058e+08	3.80086e+07
9	240	1.90272e+06	1.65632e+06	1.67213e+06	1.97386e+06	1.95716e+06	5.93806e+08	3.78534e+07
10	270	1.86116e+06	1.66614e+06	1.70437e+06	2.03939e+06	2.02782e+06	5.96394e+08	3.79588e+07
11	300	1.87504e+06	1.66408e+06	1.67458e+06	2.03588e+06	1.97121e+06	5.91698e+08	3.78463e+07
12	330	1.95247e+06	1.72841e+06	1.6718e+06	2.01676e+06	2.00366e+06	5.95031e+08	3.79514e+07
13	360	1.97627e+06	1.71694e+06	1.716e+06	2.15879e+06	1.97652e+06	5.9326e+08	3.78664e+07
14	390	1.96317e+06	1.7512e+06	1.69153e+06	2.12965e+06	2.01113e+06	5.94975e+08	3.80356e+07
15	690	1.96433e+06	1.75699e+06	1.65895e+06	2.11082e+06	2.01943e+06	5.93899e+08	3.80189e+07
16	990	1.96829e+06	1.75147e+06	1.69803e+06	2.16208e+06	2.08029e+06	5.97425e+08	3.81554e+07
17	1290	2.08014e+06	1.84454e+06	1.69635e+06	2.24128e+06	2.02148e+06	6.03027e+08	3.81436e+07
18	1590	2.06551e+06	1.86031e+06	1.73171e+06	2.29379e+06	2.10532e+06	6.11728e+08	3.81984e+07
19	1890	2.03329e+06	1.89414e+06	1.7412e+06	2.23552e+06	2.1399e+06	6.07784e+08	3.81288e+07
20	2190	2.03626e+06	1.9004e+06	1.74102e+06	2.21981e+06	2.127e+06	6.05463e+08	3.79949e+07
21	2490	2.03437e+06	1.98087e+06	1.78426e+06	2.45604e+06	2.16863e+06	6.05187e+08	3.8012e+07
22	2790	2.05444e+06	1.96758e+06	1.79018e+06	2.47051e+06	2.18067e+06	6.08203e+08	3.80098e+07
23	3090	2.07516e+06	1.97836e+06	1.7466e+06	2.46072e+06	2.20105e+06	6.12218e+08	3.8072e+07
24	3390	2.06874e+06	1.96134e+06	1.76701e+06	2.60943e+06	2.20263e+06	6.09439e+08	3.80568e+07
25	3690	2.0463e+06	1.96191e+06	1.72083e+06	2.48868e+06	2.16487e+06	6.06489e+08	3.80098e+07
26	3990	2.07639e+06	1.97209e+06	1.73396e+06	2.31333e+06	2.17917e+06	6.03135e+08	3.78595e+07
27	4290	2.19121e+06	1.97791e+06	1.76025e+06	2.1991e+06	2.19033e+06	6.09982e+08	3.78745e+07
28	4590	2.16352e+06	1.92419e+06	1.71038e+06	2.25765e+06	2.14958e+06	6.07116e+08	3.79545e+07
		Background corrected Data
	Time_(sec)	Roi1-bkgd-corr	Roi2-bkgd-corr	Roi3-bkgd-corr	Roi4-bkgd-corr	Roi5-bkgd-corr	Ref_fluo-bkgd-corr
1	0	1.39543e+06	697834	459336	1.08147e+06	1.34198e+06	1.6306e+08
2	30	1.39304e+06	671259	454072	1.096e+06	1.33857e+06	1.64426e+08
3	60	1.33344e+06	691003	490319	1.22803e+06	1.29387e+06	1.65734e+08
4	90	1.36359e+06	728034	465993	1.17699e+06	1.33096e+06	1.64406e+08
5	120	1.33107e+06	659718	462183	1.18378e+06	1.33464e+06	1.62818e+08
6	150	1.31764e+06	675359	443908	1.0867e+06	1.2737e+06	1.6207e+08
7	180	1.3814e+06	680253	478964	1.08192e+06	1.30141e+06	1.6226e+08
8	210	465719	258241	319170	437186	582973	1.63017e+08
9	240	542089	295690	311500	613228	596535	1.5803e+08
10	270	496745	301725	339954	674970	663404	1.59404e+08
11	300	514669	303708	314205	675504	610841	1.56003e+08
12	330	588323	364261	307652	652605	639506	1.58126e+08
13	360	615179	355841	354909	797696	615429	1.57334e+08
14	390	595992	384016	324347	762473	643953	1.57101e+08
15	690	597748	390413	292377	744242	652847	1.56218e+08
16	990	596805	379989	326540	790595	708807	1.58171e+08
17	1290	709078	473485	325288	870218	650422	1.63911e+08
18	1590	692478	487284	358678	920766	732296	1.71981e+08
19	1890	662760	523613	370675	864991	769372	1.68838e+08
20	2190	670548	534689	375305	854094	761281	1.68058e+08
21	2490	668044	614543	417930	1.08971e+06	802302	1.67585e+08
22	2790	688184	601326	423928	1.10426e+06	814416	1.70625e+08
23	3090	706671	609871	378116	1.09223e+06	832566	1.73924e+08
24	3390	700799	593404	399070	1.24149e+06	834685	1.71321e+08
25	3690	680052	595658	354577	1.12243e+06	798624	1.68913e+08
26	3990	715540	611238	373109	952483	818322	1.67289e+08
27	4290	829820	616522	398863	837710	828940	1.73963e+08
28	4590	799252	559924	346112	893389	785313	1.70176e+08
		Bleaching Corrected Data
	Time_(sec)	Roi1-bkgd_bleach-corr	Roi2-bkgd_bleach-corr	Roi3-bkgd_bleach-corr	Roi4-bkgd_bleach-corr	Roi5-bkgd_bleach-corr
1	0	0.00855774	0.00427961	0.00281697	0.00663231	0.00822995
2	30	0.00847216	0.00408244	0.00276156	0.00666564	0.00814084
3	60	0.00804567	0.00416935	0.00295847	0.00740963	0.00780694
4	90	0.00829405	0.00442826	0.0028344	0.007159	0.00809553
5	120	0.00817522	0.00405188	0.00283865	0.0072706	0.00819716
6	150	0.0081301	0.00416709	0.002739	0.00670512	0.00785898
7	180	0.00851353	0.00419237	0.00295183	0.00666785	0.00802055
8	210	0.00285688	0.00158414	0.0019579	0.00268184	0.00357615
9	240	0.00343029	0.0018711	0.00197114	0.00388045	0.00377482
10	270	0.00311627	0.00189283	0.00213266	0.00423434	0.00416178
11	300	0.00329909	0.00194681	0.00201409	0.00433006	0.00391556
12	330	0.00372059	0.00230361	0.00194561	0.00412712	0.00404428
13	360	0.00391001	0.00226169	0.00225576	0.00507007	0.0039116
14	390	0.0037937	0.00244439	0.00206458	0.00485341	0.00409898
15	690	0.00382637	0.00249916	0.0018716	0.00476413	0.00417908
16	990	0.00377316	0.00240239	0.00206447	0.00499835	0.00448126
17	1290	0.004326	0.00288868	0.00198455	0.0053091	0.00396815
18	1590	0.00402648	0.00283337	0.00208557	0.00535389	0.00425801
19	1890	0.00392543	0.00310128	0.00219545	0.00512321	0.00455687
20	2190	0.00398998	0.00318158	0.00223319	0.00508215	0.00452988
21	2490	0.00398631	0.00366706	0.00249384	0.00650245	0.00478744
22	2790	0.00403331	0.00352425	0.00248455	0.00647182	0.00477313
23	3090	0.00406309	0.00350653	0.00217403	0.0062799	0.00478694
24	3390	0.00409057	0.00346371	0.00232937	0.0072466	0.00487206
25	3690	0.00402605	0.00352642	0.00209917	0.00664501	0.00472803
26	3990	0.00427728	0.00365379	0.00223033	0.00569365	0.00489167
27	4290	0.00477009	0.00354398	0.0022928	0.00481544	0.00476503
28	4590	0.00469663	0.00329027	0.00203385	0.0052498	0.00461471
		Normalized Data
	Time_(sec)	Roi1_corr_norm	Roi2_corr_norm	Roi3_corr_norm	Roi4_corr_norm	Roi5_corr_norm
1	0	1	1	1	1	1
2	30	0.989999	0.953928	0.980329	1.00502	0.989173
3	60	0.940163	0.974238	1.05023	1.1172	0.948601
4	90	0.969187	1.03473	1.00619	1.07941	0.983667
5	120	0.955302	0.946787	1.0077	1.09624	0.996016
6	150	0.950028	0.973709	0.972319	1.01098	0.954924
7	180	0.994834	0.979617	1.04788	1.00536	0.974556
8	210	0.333835	0.37016	0.695036	0.40436	0.434528
9	240	0.40084	0.437213	0.699738	0.585083	0.458669
10	270	0.364146	0.442291	0.757075	0.638441	0.505687
11	300	0.385509	0.454903	0.714984	0.652873	0.47577
12	330	0.434763	0.538276	0.690674	0.622274	0.49141
13	360	0.456897	0.52848	0.800775	0.764449	0.475288
14	390	0.443306	0.571173	0.732909	0.731782	0.498057
15	690	0.447124	0.583969	0.664401	0.718321	0.50779
16	990	0.440906	0.561358	0.732869	0.753636	0.544507
17	1290	0.505508	0.674988	0.704496	0.800491	0.48216
18	1590	0.470508	0.662062	0.740359	0.807243	0.51738
19	1890	0.458699	0.724664	0.779366	0.772462	0.553694
20	2190	0.466243	0.743428	0.792762	0.766271	0.550414
21	2490	0.465813	0.856868	0.885292	0.980419	0.58171
22	2790	0.471305	0.823499	0.881995	0.975802	0.579971
23	3090	0.474786	0.819358	0.77176	0.946864	0.581649
24	3390	0.477996	0.809351	0.826907	1.09262	0.591992
25	3690	0.470458	0.824006	0.745188	1.00192	0.574491
26	3990	0.499814	0.853768	0.791748	0.858471	0.594375
27	4290	0.5574	0.828109	0.813923	0.726058	0.578986
28	4590	0.548816	0.768825	0.721999	0.791549	0.560722
		Normalize the bouton fluorescent right after bleaching to 0
	Recovery Time_(sec)
1	0	0	0	0	0	0
2	30	0.105102	0.109874	0.0149652	0.282147	0.0444083
3	60	0.047545	0.118196	0.197452	0.36545	0.130901
4	90	0.0810544	0.138862	0.0634877	0.387981	0.0758663
5	120	0.158312	0.275478	-0.013883	0.34021	0.104637
6	150	0.193031	0.259427	0.336538	0.562176	0.0749803
7	180	0.171712	0.329383	0.120538	0.511175	0.116865
8	480	0.177702	0.350351	-0.0975033	0.49016	0.134769
9	780	0.167948	0.3133	0.120413	0.545294	0.202313
10	1080	0.26928	0.499496	0.0301094	0.618444	0.0876219
11	1380	0.21438	0.478316	0.144248	0.628986	0.152412
12	1680	0.195857	0.580898	0.268396	0.574686	0.219213
13	1980	0.20769	0.611643	0.311033	0.565019	0.213179
14	2280	0.207016	0.797528	0.605529	0.899351	0.270751
15	2580	0.215631	0.742849	0.595037	0.892143	0.267551
16	2880	0.221091	0.736065	0.24419	0.846964	0.270639
17	3180	0.226127	0.719667	0.419705	1.07452	0.289665
18	3480	0.214302	0.74368	0.15962	0.932911	0.25747
19	3780	0.260349	0.792449	0.307805	0.708963	0.294048
20	4080	0.350678	0.750403	0.378383	0.502238	0.265741
21	4380	0.337213	0.65326	0.085814	0.604485	0.232142

[truncated: 2 more sheets: S540A-0131-C3, S540A-0206-C2]
