# Supplementary material for: A proline-rich motif on VGLUT1 reduces synaptic vesicle super-pool and spontaneous release frequency
Source: eLife journal article supplement (doi:10.7554/elife.50401), 2019-10-30
Supplement: supp [file elife-50401-supp-v1.zip › elife_poa_e50401_Figure_4_source_data_6.xlsx]

## Sheet: WT-0907-C1
		Raw Data
	Time_(sec)	Roi1	Roi2	Roi3	Roi4	Roi5	Ref_fluo	Background
1	0	1591408	1480718	1710831	1659866	1720793	64916726	13379399
2	30	1.69632e+06	1.49001e+06	1.74062e+06	1.66475e+06	1.68443e+06	6.51749e+07	1.33727e+07			Filter out due to wrong targeting.
3	60	1.6581e+06	1.47578e+06	1.71776e+06	1.62431e+06	1.69506e+06	6.51338e+07	1.3396e+07
4	90	1.69072e+06	1.50094e+06	1.70915e+06	1.62968e+06	1.72179e+06	6.50226e+07	1.33945e+07
5	120	1.68899e+06	1.46138e+06	1.7062e+06	1.67844e+06	1.71841e+06	6.51079e+07	1.33848e+07
6	150	1.71309e+06	1.47138e+06	1.72031e+06	1.65301e+06	1.69251e+06	6.53208e+07	1.34114e+07
7	180	1.66645e+06	1.48317e+06	1.69103e+06	1.68771e+06	1.72532e+06	6.50154e+07	1.33813e+07
8	210	1.38568e+06	1.33221e+06	1.30449e+06	1.36473e+06	1.34006e+06	6.49166e+07	1.34163e+07
9	240	1.4769e+06	1.33101e+06	1.31908e+06	1.39919e+06	1.35286e+06	6.55546e+07	1.34249e+07
10	270	1.4738e+06	1.33962e+06	1.34909e+06	1.42742e+06	1.35632e+06	6.53425e+07	1.34243e+07
11	300	1.45968e+06	1.33813e+06	1.3108e+06	1.42495e+06	1.34359e+06	6.49483e+07	1.3396e+07
12	330	1.43199e+06	1.33095e+06	1.30887e+06	1.41351e+06	1.3624e+06	6.49275e+07	1.33767e+07
13	360	1.48984e+06	1.33472e+06	1.32457e+06	1.45005e+06	1.3841e+06	6.49157e+07	1.33905e+07
14	390	1.42762e+06	1.34031e+06	1.31237e+06	1.40435e+06	1.36991e+06	6.43411e+07	1.32792e+07
15	690	1.46133e+06	1.34687e+06	1.33159e+06	1.47119e+06	1.39975e+06	6.45915e+07	1.33008e+07
16	990	1.47082e+06	1.36442e+06	1.33873e+06	1.47991e+06	1.3896e+06	6.4867e+07	1.34491e+07
17	1290	1.54963e+06	1.38526e+06	1.32707e+06	1.46558e+06	1.41446e+06	6.49893e+07	1.33822e+07
18	1590	1.53237e+06	1.36181e+06	1.33202e+06	1.47283e+06	1.36949e+06	6.41704e+07	1.33471e+07
19	1890	1.60681e+06	1.35146e+06	1.31454e+06	1.51932e+06	1.39391e+06	6.42756e+07	1.33181e+07
20	2190	1.48898e+06	1.32328e+06	1.32194e+06	1.52732e+06	1.40098e+06	6.41884e+07	1.3351e+07
21	2490	1.4681e+06	1.33423e+06	1.31086e+06	1.51791e+06	1.40274e+06	6.36613e+07	1.32593e+07
22	2790	1.48995e+06	1.37421e+06	1.32626e+06	1.4838e+06	1.37481e+06	6.4011e+07	1.32876e+07
23	3090	1.51989e+06	1.3419e+06	1.31756e+06	1.49987e+06	1.39994e+06	6.37351e+07	1.32533e+07
24	3390	1.4953e+06	1.32612e+06	1.33042e+06	1.53016e+06	1.41901e+06	6.39323e+07	1.33165e+07
25	3690	1.51347e+06	1.36632e+06	1.30478e+06	1.51442e+06	1.39196e+06	6.37188e+07	1.33204e+07
26	3990	1.49388e+06	1.35833e+06	1.33346e+06	1.51846e+06	1.41827e+06	6.35675e+07	1.33391e+07
27	4290	1.49544e+06	1.37159e+06	1.30928e+06	1.4715e+06	1.44304e+06	6.30247e+07	1.3247e+07
28	4590	1.51855e+06	1.37474e+06	1.31152e+06	1.51607e+06	1.42958e+06	6.31633e+07	1.31919e+07
		Background corrected Data
	Time_(sec)	Roi1-bkgd-corr	Roi2-bkgd-corr	Roi3-bkgd-corr	Roi4-bkgd-corr	Roi5-bkgd-corr	Ref_fluo-bkgd-corr
1	0	418172	307482	537595	486630	547557	1.42871e+07
2	30	523671	317369	567970	492109	511784	1.45707e+07
3	60	483417	301093	543070	449621	520377	1.44415e+07
4	90	516162	326381	534592	455116	547232	1.43357e+07
5	120	515285	287669	532488	504730	544701	1.44579e+07
6	150	537046	295339	544264	476962	516464	1.457e+07
7	180	493045	309767	517619	514305	551913	1.43784e+07
8	210	209202	155734	128016	188252	163589	1.41471e+07
9	240	299677	153784	141858	221962	175632	1.47528e+07
10	270	296624	162445	171916	250252	179144	1.4543e+07
11	300	284995	163440	136114	250264	168899	1.42561e+07
12	330	258987	157952	135870	240510	189398	1.4308e+07
13	360	315636	160513	150360	275844	209897	1.42441e+07
14	390	263168	175866	147927	239907	205464	1.40907e+07
15	690	294993	180535	165250	304848	233409	1.42595e+07
16	990	291475	185074	159382	300563	210254	1.39736e+07
17	1290	376147	211780	153590	292097	240978	1.43492e+07
18	1590	361959	191404	161618	302426	199085	1.36629e+07
19	1890	438947	183591	146680	351457	226046	1.38778e+07
20	2190	318242	152534	151199	356577	230242	1.36664e+07
21	2490	305389	171522	148158	355208	240030	1.34861e+07
22	2790	324765	209023	161072	318612	209622	1.37286e+07
23	3090	357707	179723	155378	337686	237761	1.35826e+07
24	3390	327577	158398	162701	362436	251284	1.35405e+07
25	3690	345409	198257	136714	346353	223900	1.33123e+07
26	3990	324186	188634	163759	348763	248571	1.30905e+07
27	4290	333815	209963	147655	309874	281420	1.28962e+07
28	4590	361759	217948	154731	359284	272790	1.32433e+07
		Bleaching Corrected Data
	Time_(sec)	Roi1-bkgd_bleach-corr	Roi2-bkgd_bleach-corr	Roi3-bkgd_bleach-corr	Roi4-bkgd_bleach-corr	Roi5-bkgd_bleach-corr
1	0	0.029	0.022	0.038	0.034	0.038
2	30	0.036	0.022	0.039	0.034	0.035
3	60	0.033	0.021	0.038	0.031	0.036
4	90	0.036	0.023	0.037	0.032	0.038
5	120	0.036	0.02	0.037	0.035	0.038
6	150	0.037	0.02	0.037	0.033	0.035
7	180	0.034	0.022	0.036	0.036	0.038
8	210	0.015	0.011	0.009	0.013	0.012
9	240	0.02	0.01	0.01	0.015	0.012
10	270	0.02	0.011	0.012	0.017	0.012
11	300	0.02	0.011	0.01	0.018	0.012
12	330	0.018	0.011	0.009	0.017	0.013
13	360	0.022	0.011	0.011	0.019	0.015
14	390	0.019	0.012	0.01	0.017	0.015
15	690	0.021	0.013	0.012	0.021	0.016
16	990	0.021	0.013	0.011	0.022	0.015
17	1290	0.026	0.015	0.011	0.02	0.017
18	1590	0.026	0.014	0.012	0.022	0.015
19	1890	0.032	0.013	0.011	0.025	0.016
20	2190	0.023	0.011	0.011	0.026	0.017
21	2490	0.023	0.013	0.011	0.026	0.018
22	2790	0.024	0.015	0.012	0.023	0.015
23	3090	0.026	0.013	0.011	0.025	0.018
24	3390	0.024	0.012	0.012	0.027	0.019
25	3690	0.026	0.015	0.01	0.026	0.017
26	3990	0.025	0.014	0.013	0.027	0.019
27	4290	0.026	0.016	0.011	0.024	0.022
28	4590	0.027	0.016	0.012	0.027	0.021
		Normalized Data
	Time_(sec)	Roi1_corr_norm	Roi2_corr_norm	Roi3_corr_norm	Roi4_corr_norm	Roi5_corr_norm
1	0	1	1	1	1	1
2	30	1.228	1.012	1.036	0.992	0.916
3	60	1.144	0.969	0.999	0.914	0.94
4	90	1.23	1.058	0.991	0.932	0.996
5	120	1.218	0.925	0.979	1.025	0.983
6	150	1.259	0.942	0.993	0.961	0.925
7	180	1.172	1.001	0.957	1.05	1.002
8	210	0.505	0.511	0.24	0.391	0.302
9	240	0.694	0.484	0.256	0.442	0.311
10	270	0.697	0.519	0.314	0.505	0.321
11	300	0.683	0.533	0.254	0.515	0.309
12	330	0.618	0.513	0.252	0.494	0.345
13	360	0.757	0.524	0.281	0.569	0.384
14	390	0.638	0.58	0.279	0.5	0.38
15	690	0.707	0.588	0.308	0.628	0.427
16	990	0.713	0.615	0.303	0.631	0.393
17	1290	0.896	0.686	0.284	0.598	0.438
18	1590	0.905	0.651	0.314	0.65	0.38
19	1890	1.081	0.615	0.281	0.744	0.425
20	2190	0.796	0.519	0.294	0.766	0.44
21	2490	0.774	0.591	0.292	0.773	0.464
22	2790	0.808	0.707	0.312	0.681	0.398
23	3090	0.9	0.615	0.304	0.73	0.457
24	3390	0.827	0.544	0.319	0.786	0.484
25	3690	0.886	0.692	0.273	0.764	0.439
26	3990	0.846	0.67	0.332	0.782	0.495
27	4290	0.884	0.756	0.304	0.705	0.569
28	4590	0.933	0.765	0.311	0.796	0.537
		Normalize the bouton fluorescent right after bleaching to 0
	Recovery Time_(sec)
1	0	0	0	0	0	0
2	30	0.280534	-0.0567568	0.0212322	0.0862944	0.0135542
3	60	0.284987	0.0168168	0.0981991	0.192893	0.0286145
4	90	0.264207	0.0462462	0.0185782	0.209814	0.0105422
5	120	0.167727	0.0042042	0.0159242	0.174281	0.064759
6	150	0.374046	0.0273273	0.0544076	0.301184	0.123494
7	180	0.197413	0.145045	0.0517536	0.184433	0.11747
8	480	0.29983	0.161862	0.090237	0.401015	0.188253
9	780	0.308736	0.218619	0.0836019	0.406091	0.137048
10	1080	0.580365	0.367868	0.0583886	0.350254	0.204819
11	1380	0.593723	0.294294	0.0981991	0.43824	0.11747
12	1680	0.854962	0.218619	0.0544076	0.597293	0.185241
13	1980	0.431934	0.0168168	0.0716588	0.634518	0.207831
14	2280	0.399279	0.168168	0.0690047	0.646362	0.243976
15	2580	0.449746	0.412012	0.095545	0.490694	0.144578
16	2880	0.586302	0.218619	0.0849289	0.573604	0.233434
17	3180	0.477947	0.0693694	0.104834	0.668359	0.274096
18	3480	0.565522	0.38048	0.0437915	0.631134	0.206325
19	3780	0.506149	0.334234	0.122085	0.661591	0.290663
20	4080	0.562553	0.515015	0.0849289	0.531303	0.402108
21	4380	0.635284	0.533934	0.094218	0.685279	0.353916

## Sheet: WT-0908-C1
		Raw Data
	Time_(sec)	Roi1	Roi2	Roi3	Roi4	Roi5	Ref_fluo	Background
1	0	1541701	1611724	1834419	1782986	1577525	131279593	9475330
2	30	1.53175e+06	1.60224e+06	1.84384e+06	1.7845e+06	1.58177e+06	1.31375e+08	9.52758e+06			Filter out due to wrong targeting.
3	60	1.58111e+06	1.59122e+06	1.82759e+06	1.78761e+06	1.59269e+06	1.3111e+08	9.43753e+06
4	90	1.51089e+06	1.60304e+06	1.84847e+06	1.77514e+06	1.56804e+06	1.31086e+08	9.51142e+06
5	120	1.5817e+06	1.62627e+06	1.79928e+06	1.77051e+06	1.54856e+06	1.31265e+08	9.51274e+06
6	150	1.51252e+06	1.62138e+06	1.8087e+06	1.76561e+06	1.55484e+06	1.31153e+08	9.46697e+06
7	180	1.54945e+06	1.59277e+06	1.80835e+06	1.768e+06	1.57534e+06	1.31144e+08	9.50022e+06
8	210	1.27798e+06	1.29165e+06	1.39438e+06	1.41729e+06	1.2732e+06	1.30609e+08	9.52162e+06
9	240	1.2834e+06	1.31332e+06	1.44591e+06	1.4486e+06	1.30433e+06	1.30368e+08	9.50121e+06
10	270	1.26614e+06	1.30894e+06	1.42762e+06	1.44978e+06	1.28464e+06	1.29781e+08	9.47382e+06
11	300	1.30792e+06	1.31957e+06	1.4231e+06	1.45107e+06	1.30185e+06	1.30043e+08	9.47696e+06
12	330	1.27635e+06	1.31917e+06	1.42041e+06	1.44297e+06	1.28833e+06	1.29003e+08	9.41675e+06
13	360	1.28862e+06	1.30346e+06	1.45915e+06	1.50652e+06	1.28018e+06	1.2928e+08	9.46359e+06
14	390	1.28268e+06	1.33102e+06	1.45451e+06	1.46649e+06	1.29575e+06	1.29139e+08	9.43829e+06
15	690	1.28989e+06	1.36309e+06	1.48016e+06	1.5086e+06	1.32236e+06	1.29749e+08	9.45804e+06
16	990	1.28319e+06	1.34733e+06	1.48173e+06	1.5196e+06	1.32202e+06	1.29778e+08	9.4045e+06
17	1290	1.30157e+06	1.37874e+06	1.4912e+06	1.52596e+06	1.34441e+06	1.30531e+08	9.45798e+06
18	1590	1.28968e+06	1.42008e+06	1.50913e+06	1.53441e+06	1.304e+06	1.29547e+08	9.42106e+06
19	1890	1.28084e+06	1.46622e+06	1.51341e+06	1.54329e+06	1.35803e+06	1.29418e+08	9.39967e+06
20	2190	1.29627e+06	1.47542e+06	1.48288e+06	1.58555e+06	1.34201e+06	1.29167e+08	9.4171e+06
21	2490	1.30961e+06	1.4795e+06	1.4662e+06	1.58294e+06	1.34752e+06	1.29473e+08	9.44218e+06
22	2790	1.30622e+06	1.45927e+06	1.5012e+06	1.57884e+06	1.34281e+06	1.2926e+08	9.37752e+06
23	3090	1.29186e+06	1.45744e+06	1.45872e+06	1.53341e+06	1.36134e+06	1.28741e+08	9.41525e+06
24	3390	1.31643e+06	1.48914e+06	1.44629e+06	1.6197e+06	1.36988e+06	1.29256e+08	9.43342e+06
25	3690	1.30562e+06	1.46902e+06	1.45753e+06	1.62514e+06	1.36122e+06	1.28603e+08	9.2933e+06
26	3990	1.32372e+06	1.49269e+06	1.52586e+06	1.61678e+06	1.35894e+06	1.29609e+08	9.39509e+06
27	4290	1.30198e+06	1.48404e+06	1.50588e+06	1.58669e+06	1.33817e+06	1.29554e+08	9.40269e+06
28	4590	1.31911e+06	1.4757e+06	1.49984e+06	1.63956e+06	1.37038e+06	1.28793e+08	9.33713e+06
		Background corrected Data
	Time_(sec)	Roi1-bkgd-corr	Roi2-bkgd-corr	Roi3-bkgd-corr	Roi4-bkgd-corr	Roi5-bkgd-corr	Ref_fluo-bkgd-corr
1	0	346752	416775	639470	588037	382576	2.96477e+07
2	30	330209	400703	642305	582960	380233	2.91824e+07
3	60	390932	401033	637406	597423	402506	2.98831e+07
4	90	311392	403544	648973	575643	368538	2.90671e+07
5	120	382037	426605	599617	570847	348890	2.92321e+07
6	150	318621	427484	614802	571713	360946	2.96107e+07
7	180	351358	394680	610267	569909	377252	2.92447e+07
8	210	77188.7	90865.1	193589	216499	72409.6	2.84801e+07
9	240	85189.7	115103	247696	250386	106121	2.84586e+07
10	270	71383	114181	232864	255024	89885.9	2.8165e+07
11	300	112770	124418	227943	255918	106695	2.83932e+07
12	330	88792.5	131606	232845	255408	100767	2.79992e+07
13	360	95150.2	109995	265682	313051	86715.9	2.7774e+07
14	390	92403.7	140742	264235	276214	105475	2.79043e+07
15	690	97125.2	170317	287395	315829	129596	2.83022e+07
16	990	97172.9	161309	295710	333581	136003	2.89061e+07
17	1290	108813	185983	298436	333196	151647	2.9085e+07
18	1590	101577	231970	321025	346303	115891	2.84974e+07
19	1890	95432.3	280817	328000	357878	172620	2.85975e+07
20	2190	108662	287812	295277	397945	154405	2.81599e+07
21	2490	118844	288735	275435	392174	156753	2.81963e+07
22	2790	123610	276661	318584	396222	160195	2.86769e+07
23	3090	104485	270064	271344	346039	173963	2.77533e+07
24	3390	126766	299474	256628	430040	180213	2.80738e+07
25	3690	133628	297025	285535	453143	189223	2.89238e+07
26	3990	138895	307859	341025	431952	174113	2.88382e+07
27	4290	116187	298253	320093	400906	152385	2.87008e+07
28	4590	141589	298176	322318	462042	192856	2.86437e+07
		Bleaching Corrected Data
	Time_(sec)	Roi1-bkgd_bleach-corr	Roi2-bkgd_bleach-corr	Roi3-bkgd_bleach-corr	Roi4-bkgd_bleach-corr	Roi5-bkgd_bleach-corr
1	0	0.012	0.014	0.022	0.02	0.013
2	30	0.011	0.014	0.022	0.02	0.013
3	60	0.013	0.013	0.021	0.02	0.013
4	90	0.011	0.014	0.022	0.02	0.013
5	120	0.013	0.015	0.021	0.02	0.012
6	150	0.011	0.014	0.021	0.019	0.012
7	180	0.012	0.013	0.021	0.019	0.013
8	210	0.003	0.003	0.007	0.008	0.003
9	240	0.003	0.004	0.009	0.009	0.004
10	270	0.003	0.004	0.008	0.009	0.003
11	300	0.004	0.004	0.008	0.009	0.004
12	330	0.003	0.005	0.008	0.009	0.004
13	360	0.003	0.004	0.01	0.011	0.003
14	390	0.003	0.005	0.009	0.01	0.004
15	690	0.003	0.006	0.01	0.011	0.005
16	990	0.003	0.006	0.01	0.012	0.005
17	1290	0.004	0.006	0.01	0.011	0.005
18	1590	0.004	0.008	0.011	0.012	0.004
19	1890	0.003	0.01	0.011	0.013	0.006
20	2190	0.004	0.01	0.01	0.014	0.005
21	2490	0.004	0.01	0.01	0.014	0.006
22	2790	0.004	0.01	0.011	0.014	0.006
23	3090	0.004	0.01	0.01	0.012	0.006
24	3390	0.005	0.011	0.009	0.015	0.006
25	3690	0.005	0.01	0.01	0.016	0.007
26	3990	0.005	0.011	0.012	0.015	0.006
27	4290	0.004	0.01	0.011	0.014	0.005
28	4590	0.005	0.01	0.011	0.016	0.007
		Normalized Data
	Time_(sec)	Roi1_corr_norm	Roi2_corr_norm	Roi3_corr_norm	Roi4_corr_norm	Roi5_corr_norm
1	0	1	1	1	1	1
2	30	0.967	0.977	1.02	1.007	1.01
3	60	1.119	0.955	0.989	1.008	1.044
4	90	0.916	0.988	1.035	0.998	0.983
5	120	1.117	1.038	0.951	0.985	0.925
6	150	0.92	1.027	0.963	0.973	0.945
7	180	1.027	0.96	0.967	0.983	1
8	210	0.232	0.227	0.315	0.383	0.197
9	240	0.256	0.288	0.404	0.444	0.289
10	270	0.217	0.288	0.383	0.457	0.247
11	300	0.34	0.312	0.372	0.454	0.291
12	330	0.271	0.334	0.386	0.46	0.279
13	360	0.293	0.282	0.444	0.568	0.242
14	390	0.283	0.359	0.439	0.499	0.293
15	690	0.293	0.428	0.471	0.563	0.355
16	990	0.287	0.397	0.474	0.582	0.365
17	1290	0.32	0.455	0.476	0.578	0.404
18	1590	0.305	0.579	0.522	0.613	0.315
19	1890	0.285	0.699	0.532	0.631	0.468
20	2190	0.33	0.727	0.486	0.712	0.425
21	2490	0.36	0.728	0.453	0.701	0.431
22	2790	0.369	0.686	0.515	0.697	0.433
23	3090	0.322	0.692	0.453	0.629	0.486
24	3390	0.386	0.759	0.424	0.772	0.497
25	3690	0.395	0.731	0.458	0.79	0.507
26	3990	0.412	0.759	0.548	0.755	0.468
27	4290	0.346	0.739	0.517	0.704	0.411
28	4590	0.423	0.741	0.522	0.813	0.522
		Normalize the bouton fluorescent right after bleaching to 0
	Recovery Time_(sec)
1	0	0	0	0	0	0
2	30	0.030871	0.0797237	0.131992	0.0999298	0.116498
3	60	-0.0192944	0.0797237	0.100847	0.121226	0.063314
4	90	0.13892	0.11109	0.0845339	0.116312	0.11903
5	120	0.0501654	0.139843	0.105297	0.126141	0.103835
6	150	0.0784638	0.071882	0.191314	0.303066	0.0569826
7	180	0.0656009	0.172517	0.183898	0.19003	0.121563
8	480	0.0784638	0.262696	0.231356	0.294875	0.200072
9	780	0.070746	0.222181	0.235805	0.326	0.212735
10	1080	0.113194	0.297984	0.238771	0.319448	0.26212
11	1380	0.0938993	0.460045	0.306992	0.376784	0.149421
12	1680	0.0681735	0.616878	0.321822	0.406272	0.343162
13	1980	0.126057	0.653473	0.253602	0.538966	0.288712
14	2280	0.164645	0.65478	0.204661	0.520945	0.29631
15	2580	0.176222	0.599888	0.29661	0.514393	0.298842
16	2880	0.115766	0.60773	0.204661	0.402996	0.365955
17	3180	0.198089	0.695295	0.161653	0.637257	0.379884
18	3480	0.209666	0.658701	0.212076	0.666745	0.392547
19	3780	0.231533	0.695295	0.345551	0.609408	0.343162
20	4080	0.146637	0.669156	0.299576	0.52586	0.270984
21	4380	0.245682	0.67177	0.306992	0.704423	0.411541

## Sheet: WT-0920-C1
		Raw Data
	Time_(sec)	Roi1	Roi2	Roi3	Roi4	Roi5	Ref_fluo	Background
1	0	1427174	1284851	1092512	1542991	1468515	263993078	80693090
2	30	1.40415e+06	1.28411e+06	1.07508e+06	1.55264e+06	1.44567e+06	2.64645e+08	8.08924e+07			Filtered out due to bouton moved.
3	60	1.42201e+06	1.25974e+06	1.08096e+06	1.55719e+06	1.50218e+06	2.64541e+08	8.06817e+07
4	90	1.36611e+06	1.23845e+06	1.10124e+06	1.54489e+06	1.46983e+06	2.64037e+08	8.06089e+07
5	120	1.35864e+06	1.26673e+06	1.08927e+06	1.6624e+06	1.46525e+06	2.64486e+08	8.0677e+07
6	150	1.44909e+06	1.23838e+06	1.09472e+06	1.73253e+06	1.49961e+06	2.63449e+08	8.04376e+07
7	180	1.38973e+06	1.28558e+06	1.11151e+06	1.63959e+06	1.44873e+06	2.63841e+08	8.07974e+07
8	210	939714	891423	855243	1.31711e+06	935861	2.6356e+08	8.05556e+07
9	240	1.05308e+06	925847	887350	1.31982e+06	983450	2.62885e+08	8.06997e+07
10	270	1.10449e+06	981679	898543	1.28538e+06	979324	2.63921e+08	8.06712e+07
11	300	1.03934e+06	975767	872410	1.28323e+06	973695	2.62388e+08	8.02655e+07
12	330	1.04434e+06	983863	879691	1.39031e+06	984345	2.63009e+08	8.04717e+07
13	360	1.09041e+06	997576	862402	1.33206e+06	982149	2.62043e+08	8.04131e+07
14	390	1.05778e+06	1.0577e+06	902682	1.36608e+06	1.00127e+06	2.63666e+08	8.05035e+07
15	690	1.08645e+06	1.0105e+06	918279	1.33858e+06	1.03447e+06	2.64468e+08	8.02477e+07
16	990	1.17667e+06	1.07554e+06	989422	1.2904e+06	1.0206e+06	2.65079e+08	8.01188e+07
17	1290	1.18099e+06	1.05251e+06	895152	1.30167e+06	1.05612e+06	2.64078e+08	7.97856e+07
18	1590	1.26596e+06	957116	875249	1.33285e+06	1.06679e+06	2.64459e+08	7.975e+07
19	1890	1.28894e+06	1.14891e+06	930908	1.35981e+06	1.07999e+06	2.654e+08	7.99195e+07
20	2190	1.17845e+06	1.14957e+06	887348	1.35772e+06	1.09198e+06	2.64028e+08	7.96297e+07
21	2490	1.22402e+06	1.18752e+06	926304	1.33703e+06	1.0845e+06	2.64319e+08	7.93634e+07
22	2790	1.20539e+06	1.05261e+06	911035	1.35018e+06	1.09355e+06	2.6545e+08	7.97269e+07
23	3090	1.25194e+06	1.25166e+06	983969	1.40561e+06	1.10624e+06	2.66494e+08	7.97077e+07
24	3390	1.27496e+06	1.20664e+06	957878	1.40178e+06	1.10134e+06	2.63755e+08	7.94067e+07
25	3690	1.2468e+06	1.19742e+06	933904	1.36191e+06	1.12719e+06	2.62485e+08	7.9297e+07
26	3990	1.41036e+06	1.07197e+06	1.00489e+06	1.33964e+06	1.13506e+06	2.6399e+08	7.94924e+07
27	4290	1.42696e+06	1.11459e+06	1.03529e+06	1.42259e+06	1.16743e+06	2.64239e+08	7.96197e+07
28	4590	1.36775e+06	1.12165e+06	947281	1.46633e+06	1.18641e+06	2.63182e+08	7.93544e+07
		Background corrected Data
	Time_(sec)	Roi1-bkgd-corr	Roi2-bkgd-corr	Roi3-bkgd-corr	Roi4-bkgd-corr	Roi5-bkgd-corr	Ref_fluo-bkgd-corr
1	0	705007	562684	370345	820824	746348	5.09991e+07
2	30	680197	560164	351125	828694	721716	5.11247e+07
3	60	699950	537674	358898	835125	780111	5.15771e+07
4	90	644697	517037	379828	823480	748422	5.12648e+07
5	120	636615	544706	367252	940375	743224	5.15339e+07
6	150	729209	518497	374837	1.01265e+06	779734	5.11293e+07
7	180	666632	562482	388410	916488	725629	5.05718e+07
8	210	218777	170486	134307	596175	214924	5.0929e+07
9	240	330854	203622	165124	597590	261225	4.98732e+07
10	270	382515	259708	176572	563407	257353	5.09847e+07
11	300	320998	257427	154070	564885	255356	5.05225e+07
12	330	324159	263678	159505	670128	264159	5.05995e+07
13	360	370747	277915	142741	612398	262488	4.97879e+07
14	390	337315	337226	182212	645613	280801	5.11727e+07
15	690	368267	292319	200099	620403	316285	5.26497e+07
16	990	459640	358517	272395	573370	303576	5.36011e+07
17	1290	466945	338470	181107	587622	342071	5.34792e+07
18	1590	552237	243389	161522	619120	353062	5.39543e+07
19	1890	573698	433665	215665	644570	364745	5.44478e+07
20	2190	465801	436922	174698	645073	379331	5.38412e+07
21	2490	513756	477255	216038	626760	374236	5.48348e+07
22	2790	491868	339092	197515	636663	380031	5.50068e+07
23	3090	538590	538316	270622	692266	392888	5.61011e+07
24	3390	564309	495989	247223	691125	390682	5.41564e+07
25	3690	537131	487748	224231	652234	417514	5.31764e+07
26	3990	698936	360549	293467	628224	423635	5.4165e+07
27	4290	714396	402029	322731	710030	454872	5.40779e+07
28	4590	657568	411465	237096	756143	476223	5.37218e+07
		Bleaching Corrected Data
	Time_(sec)	Roi1-bkgd_bleach-corr	Roi2-bkgd_bleach-corr	Roi3-bkgd_bleach-corr	Roi4-bkgd_bleach-corr	Roi5-bkgd_bleach-corr
1	0	0.014	0.011	0.007	0.016	0.015
2	30	0.013	0.011	0.007	0.016	0.014
3	60	0.014	0.01	0.007	0.016	0.015
4	90	0.013	0.01	0.007	0.016	0.015
5	120	0.012	0.011	0.007	0.018	0.014
6	150	0.014	0.01	0.007	0.02	0.015
7	180	0.013	0.011	0.008	0.018	0.014
8	210	0.004	0.003	0.003	0.012	0.004
9	240	0.007	0.004	0.003	0.012	0.005
10	270	0.008	0.005	0.003	0.011	0.005
11	300	0.006	0.005	0.003	0.011	0.005
12	330	0.006	0.005	0.003	0.013	0.005
13	360	0.007	0.006	0.003	0.012	0.005
14	390	0.007	0.007	0.004	0.013	0.005
15	690	0.007	0.006	0.004	0.012	0.006
16	990	0.009	0.007	0.005	0.011	0.006
17	1290	0.009	0.006	0.003	0.011	0.006
18	1590	0.01	0.005	0.003	0.011	0.007
19	1890	0.011	0.008	0.004	0.012	0.007
20	2190	0.009	0.008	0.003	0.012	0.007
21	2490	0.009	0.009	0.004	0.011	0.007
22	2790	0.009	0.006	0.004	0.012	0.007
23	3090	0.01	0.01	0.005	0.012	0.007
24	3390	0.01	0.009	0.005	0.013	0.007
25	3690	0.01	0.009	0.004	0.012	0.008
26	3990	0.013	0.007	0.005	0.012	0.008
27	4290	0.013	0.007	0.006	0.013	0.008
28	4590	0.012	0.008	0.004	0.014	0.009
		Normalized Data
	Time_(sec)	Roi1_corr_norm	Roi2_corr_norm	Roi3_corr_norm	Roi4_corr_norm	Roi5_corr_norm
1	0	1	1	1	1	1
2	30	0.995109	0.993737	0.946077	1.01896	0.944182
3	60	1.02565	0.939439	0.972319	1.03741	1.02273
4	90	0.973728	0.918845	0.993665	1.03261	0.982091
5	120	0.950436	0.951343	0.97245	1.18147	0.971388
6	150	1.04171	0.917682	0.99509	1.26289	1.01371
7	180	0.994608	1.04295	0.999408	1.14808	0.980315
8	210	0.394896	0.371654	0.381999	0.724689	0.330616
9	240	0.563675	0.399451	0.497874	0.803879	0.41123
10	270	0.599439	0.486501	0.492581	0.684065	0.391495
11	300	0.549814	0.490479	0.467085	0.708811	0.394441
12	330	0.548241	0.495814	0.456038	0.838553	0.39768
13	360	0.592465	0.538795	0.409948	0.780656	0.402681
14	390	0.557486	0.6489	0.501088	0.807166	0.425427
15	690	0.608278	0.569269	0.533991	0.716879	0.451598
16	990	0.689864	0.669155	0.728489	0.68826	0.42637
17	1290	0.698895	0.631943	0.507628	0.684007	0.491778
18	1590	0.759636	0.462731	0.430519	0.703121	0.46542
19	1890	0.80445	0.733575	0.507865	0.738462	0.490655
20	2190	0.653473	0.718858	0.489086	0.746653	0.497098
21	2490	0.692111	0.732221	0.533538	0.694078	0.491249
22	2790	0.684204	0.56878	0.509191	0.737502	0.520218
23	3090	0.723085	0.857159	0.639083	0.771653	0.528673
24	3390	0.767169	0.801422	0.641338	0.773634	0.52195
25	3690	0.737352	0.829462	0.596445	0.731211	0.563052
26	3990	0.909045	0.621491	0.766914	0.705782	0.555995
27	4290	0.958036	0.66857	0.799363	0.801726	0.605606
28	4590	0.843969	0.74749	0.606433	0.866521	0.623114
		Normalize the bouton fluorescent right after bleaching to 0
	Recovery Time_(sec)
1	0	0	0	0	0	0
2	30	0.280167	0.0467466	0.192895	0.212501	0.122671
3	60	0.339533	0.19314	0.184083	-0.109012	0.09264
4	90	0.257158	0.19983	0.141641	-0.0426075	0.097123
5	120	0.254547	0.208802	0.123251	0.305546	0.102052
6	150	0.327957	0.281084	0.0465261	0.150184	0.109662
7	180	0.269893	0.466249	0.198245	0.221321	0.144275
8	480	0.354206	0.332332	0.253018	-0.0209576	0.184099
9	780	0.489635	0.500312	0.576794	-0.0977547	0.14571
10	1080	0.504627	0.437732	0.209132	-0.109167	0.245241
11	1380	0.605454	0.153166	0.0807702	-0.0578763	0.205132
12	1680	0.679844	0.608648	0.209526	0.0369589	0.243533
13	1980	0.429228	0.583898	0.178265	0.0589389	0.253337
14	2280	0.493365	0.606371	0.252264	-0.0821425	0.244436
15	2580	0.48024	0.33151	0.211734	0.0343828	0.288519
16	2880	0.544781	0.816481	0.427962	0.126025	0.301385
17	3180	0.617959	0.722747	0.431716	0.131341	0.291154
18	3480	0.568464	0.769903	0.356984	0.0175013	0.3537
19	3780	0.853467	0.420155	0.64076	-0.0507356	0.342961
20	4080	0.934791	0.499328	0.694777	0.206724	0.418454
21	4380	0.745444	0.632049	0.37361	0.380596	0.445096

## Sheet: WT-1011-C1
		Raw Data
	Time_(sec)	Roi1	Roi2	Roi3	Roi4	Roi5	Ref_fluo	Background
1	0	1205819	1287768	1821915	1414586	1144497	579373819	25570569
2	30	1.19938e+06	1.32149e+06	1.91591e+06	1.41693e+06	1.13156e+06	5.8908e+08	2.55143e+07			Filter out due to synapse moved or large abrupt change.
3	60	1.17607e+06	1.27826e+06	1.8671e+06	1.44116e+06	1.11799e+06	5.8824e+08	2.55754e+07
4	90	1.16791e+06	1.27486e+06	1.82017e+06	1.45694e+06	1.11192e+06	5.88275e+08	2.54969e+07
5	120	1.15916e+06	1.19024e+06	1.77788e+06	1.45561e+06	1.11453e+06	5.82802e+08	2.5452e+07
6	150	1.1575e+06	1.29392e+06	1.81006e+06	1.40115e+06	1.09924e+06	5.85522e+08	2.54557e+07
7	180	1.18434e+06	1.21965e+06	1.80015e+06	1.42773e+06	1.10404e+06	5.87896e+08	2.55172e+07
8	210	852392	780324	911442	808167	801553	5.88095e+08	2.55003e+07
9	240	889321	872917	938257	886403	831314	5.90319e+08	2.55178e+07
10	270	879865	926745	973929	881708	831986	5.90441e+08	2.55043e+07
11	300	881330	919434	974913	873781	834444	5.91595e+08	2.55218e+07
12	330	911235	945828	968740	883854	836064	5.9245e+08	2.55937e+07
13	360	908382	960641	981051	915498	845250	5.925e+08	2.55488e+07
14	390	904740	962682	980234	891946	831950	5.84736e+08	2.54713e+07
15	690	997772	998594	989728	1.06273e+06	810471	5.90541e+08	2.54123e+07
16	990	982873	1.00984e+06	957713	1.28322e+06	840091	6.00308e+08	2.54857e+07
17	1290	1.02882e+06	1.13358e+06	974140	1.24804e+06	910254	6.04125e+08	2.55424e+07
18	1590	1.10473e+06	1.14901e+06	1.00683e+06	1.39549e+06	1.03612e+06	6.05729e+08	2.55135e+07
19	1890	1.14439e+06	1.01879e+06	1.01235e+06	1.47988e+06	1.08409e+06	6.11742e+08	2.56442e+07
20	2190	1.21998e+06	1.01881e+06	992963	1.47232e+06	1.04766e+06	6.09408e+08	2.55587e+07
21	2490	1.14324e+06	878895	996984	1.71768e+06	1.16065e+06	6.11056e+08	2.55895e+07
22	2790	1.1622e+06	1.12475e+06	1.03339e+06	1.48273e+06	1.04187e+06	6.1088e+08	2.55699e+07
23	3090	1.19293e+06	1.06406e+06	1.00628e+06	1.69086e+06	1.00927e+06	6.09694e+08	2.55607e+07
24	3390	1.27192e+06	949958	1.01985e+06	1.61137e+06	1.0491e+06	6.1746e+08	2.56615e+07
25	3690	1.19354e+06	1.13038e+06	1.04338e+06	1.88072e+06	1.04359e+06	6.12243e+08	2.56599e+07
26	3990	1.21409e+06	1.01305e+06	1.01178e+06	1.3826e+06	903509	6.10407e+08	2.56017e+07
27	4290	1.12485e+06	1.1226e+06	1.00901e+06	1.42374e+06	869344	6.12366e+08	2.55821e+07
28	4590	1.13938e+06	1.11414e+06	995320	1.71383e+06	848197	6.08388e+08	2.55044e+07
		Background corrected Data
	Time_(sec)	Roi1-bkgd-corr	Roi2-bkgd-corr	Roi3-bkgd-corr	Roi4-bkgd-corr	Roi5-bkgd-corr	Ref_fluo-bkgd-corr
1	0	507170	589119	1.12327e+06	715937	445848	1.36317e+08
2	30	502269	624383	1.21879e+06	719816	434449	1.46999e+08
3	60	477290	579476	1.16832e+06	742378	419203	1.45098e+08
4	90	471271	578222	1.12353e+06	760308	415281	1.46495e+08
5	120	463749	494826	1.08247e+06	760197	419115	1.41799e+08
6	150	461992	598409	1.11455e+06	705639	403726	1.44455e+08
7	180	487151	522456	1.10296e+06	730535	406846	1.45764e+08
8	210	155663	83594.2	214713	111438	104823	1.46255e+08
9	240	192113	175710	241050	189195	134107	1.48176e+08
10	270	183027	229907	277092	184870	135148	1.48532e+08
11	300	184013	222117	277596	176464	137127	1.49383e+08
12	330	211953	246546	269458	184572	136782	1.48992e+08
13	360	210328	262586	282997	217444	147195	1.4982e+08
14	390	208803	266745	284297	196009	136013	1.43399e+08
15	690	303448	304269	295404	368402	116146	1.50227e+08
16	990	286543	313510	261382	586889	143761	1.58722e+08
17	1290	330937	435705	276261	550159	212375	1.61556e+08
18	1590	407637	451924	309741	698401	339030	1.63661e+08
19	1890	443728	318124	311684	779220	383433	1.67409e+08
20	2190	521657	320483	294637	773993	349330	1.66556e+08
21	2490	444070	179729	297819	1.01852e+06	461484	1.67671e+08
22	2790	463569	426117	334761	784095	343240	1.67835e+08
23	3090	494553	365676	307897	992478	310894	1.66808e+08
24	3390	570791	248825	318718	910240	347970	1.72828e+08
25	3690	492447	429286	342293	1.17963e+06	342499	1.67638e+08
26	3990	514595	313548	312285	683101	204010	1.66811e+08
27	4290	425882	423633	310042	724774	170380	1.69109e+08
28	4590	442537	417295	298480	1.01699e+06	151356	1.66478e+08
		Bleaching Corrected Data
	Time_(sec)	Roi1-bkgd_bleach-corr	Roi2-bkgd_bleach-corr	Roi3-bkgd_bleach-corr	Roi4-bkgd_bleach-corr	Roi5-bkgd_bleach-corr
1	0	0.004	0.004	0.008	0.005	0.003
2	30	0.003	0.004	0.008	0.005	0.003
3	60	0.003	0.004	0.008	0.005	0.003
4	90	0.003	0.004	0.008	0.005	0.003
5	120	0.003	0.003	0.008	0.005	0.003
6	150	0.003	0.004	0.008	0.005	0.003
7	180	0.003	0.004	0.008	0.005	0.003
8	210	0.001	0.0005716	0.001	0.0007619	0.0007167
9	240	0.001	0.001	0.002	0.001	0.0009051
10	270	0.001	0.002	0.002	0.001	0.0009099
11	300	0.001	0.001	0.002	0.001	0.000918
12	330	0.001	0.002	0.002	0.001	0.0009181
13	360	0.001	0.002	0.002	0.001	0.0009825
14	390	0.001	0.002	0.002	0.001	0.0009485
15	690	0.002	0.002	0.002	0.002	0.0007731
16	990	0.002	0.002	0.002	0.004	0.0009057
17	1290	0.002	0.003	0.002	0.003	0.001
18	1590	0.002	0.003	0.002	0.004	0.002
19	1890	0.003	0.002	0.002	0.005	0.002
20	2190	0.003	0.002	0.002	0.005	0.002
21	2490	0.003	0.001	0.002	0.006	0.003
22	2790	0.003	0.003	0.002	0.005	0.002
23	3090	0.003	0.002	0.002	0.006	0.002
24	3390	0.003	0.001	0.002	0.005	0.002
25	3690	0.003	0.003	0.002	0.007	0.002
26	3990	0.003	0.002	0.002	0.004	0.001
27	4290	0.003	0.003	0.002	0.004	0.001
28	4590	0.003	0.003	0.002	0.006	0.0009092
		Normalized Data
	Time_(sec)	Roi1_corr_norm	Roi2_corr_norm	Roi3_corr_norm	Roi4_corr_norm	Roi5_corr_norm
1	0	1	1	1	1	1
2	30	0.935305	0.974706	1.02024	0.90412	0.914252
3	60	0.892974	0.921885	1.01242	0.94129	0.909693
4	90	0.892575	0.923363	0.970248	0.95017	0.902478
5	120	0.901311	0.791704	0.961055	0.96155	0.879614
6	150	0.876454	0.905566	0.947239	0.89307	0.841825
7	180	0.919366	0.823015	0.937977	0.91222	0.832873
8	210	0.296105	0.165835	0.292284	0.21778	0.366537
9	240	0.35221	0.280126	0.318661	0.29062	0.414089
10	270	0.367418	0.389013	0.332692	0.29067	0.37706
11	300	0.356453	0.357201	0.337681	0.2797	0.397359
12	330	0.394993	0.41236	0.333651	0.29057	0.404496
13	360	0.393921	0.426001	0.33611	0.30422	0.415316
14	390	0.388874	0.453892	0.368925	0.32123	0.446468
15	690	0.553314	0.472114	0.372832	0.49961	0.338161
16	990	0.525812	0.476418	0.279428	0.67497	0.318904
17	1290	0.639628	0.614944	0.273832	0.66228	0.413944
18	1590	0.758388	0.676715	0.328649	0.77639	0.569751
19	1890	0.767336	0.462383	0.328726	0.83773	0.61506
20	2190	0.971498	0.483548	0.320498	0.87177	0.629523
21	2490	0.792342	0.307099	0.315983	1.15473	0.726879
22	2790	0.823748	0.627469	0.340325	0.87232	0.670491
23	3090	0.865202	0.578877	0.327823	1.09014	0.540165
24	3390	1.01414	0.389643	0.331807	0.94117	0.570697
25	3690	0.947173	0.631719	0.363958	1.29437	0.61157
26	3990	0.913272	0.461649	0.329471	0.77472	0.508138
27	4290	0.764022	0.619548	0.32373	0.8863	0.461552
28	4590	0.79254	0.634835	0.332979	1.21637	0.460206
		Normalize the bouton fluorescent right after bleaching to 0
	Recovery Time_(sec)
1	0	0	0	0	0	0
2	30	0.0903826	0.154465	0.0384409	0.101208	0.0896006
3	60	0.114882	0.301627	0.0588892	0.101277	0.0198281
4	90	0.0972179	0.258633	0.06616	0.0860348	0.0580768
5	120	0.159304	0.333181	0.0602868	0.101138	0.0715248
6	150	0.157577	0.351617	0.0638705	0.120104	0.0919126
7	180	0.149447	0.389312	0.111694	0.143739	0.150611
8	480	0.414352	0.413939	0.117388	0.391589	-0.0534679
9	780	0.370048	0.419756	-0.0187359	0.635243	-0.0897532
10	1080	0.5534	0.606975	-0.0268913	0.617611	0.0893274
11	1380	0.744717	0.690459	0.0529971	0.776161	0.382909
12	1680	0.759132	0.400787	0.0531093	0.86139	0.468283
13	1980	1.08803	0.429392	0.0411181	0.908687	0.495535
14	2280	0.799415	0.19092	0.0345381	1.30185	0.67898
15	2580	0.850009	0.623903	0.0700133	0.909451	0.57273
16	2880	0.916789	0.55823	0.0517933	1.2121	0.327161
17	3180	1.15672	0.302479	0.0575994	1.00512	0.384692
18	3480	1.04884	0.629647	0.104455	1.49587	0.461707
19	3780	0.994228	0.399795	0.054195	0.773841	0.266814
20	4080	0.753793	0.613197	0.0458283	0.928876	0.179033
21	4380	0.799734	0.633858	0.0593075	1.38749	0.176497

## Sheet: WT-1013-C2
		Raw Data
	Time_(sec)	Roi1	Roi2	Roi3	Roi4	Roi5	Ref_fluo	Background
1	0	1732375	1454103	1447397	1787397	1701443	546354547	3.01215e+07
2	30	1.73603e+06	1.43744e+06	1.45616e+06	1.79409e+06	1.73812e+06	5.47968e+08	3.00736e+07
3	60	1.72516e+06	1.43369e+06	1.43917e+06	1.80384e+06	1.71102e+06	5.51233e+08	3.00945e+07
4	90	1.78975e+06	1.44047e+06	1.431e+06	1.82048e+06	1.69875e+06	5.5181e+08	3.02064e+07
5	120	1.72383e+06	1.44077e+06	1.43523e+06	1.79052e+06	1.71338e+06	5.52128e+08	3.01385e+07
6	150	1.72549e+06	1.43689e+06	1.46076e+06	1.75958e+06	1.70568e+06	5.50698e+08	3.0168e+07
7	180	1.71005e+06	1.46226e+06	1.44937e+06	1.79036e+06	1.7263e+06	5.48118e+08	3.01018e+07
8	210	1.2762e+06	1.1725e+06	1.27484e+06	1.55885e+06	1.22559e+06	5.4523e+08	3.0036e+07
9	240	1.32982e+06	1.18285e+06	1.27321e+06	1.56669e+06	1.26984e+06	5.46354e+08	3.01342e+07
10	270	1.32528e+06	1.20129e+06	1.27732e+06	1.55105e+06	1.28553e+06	5.4482e+08	3.01265e+07
11	300	1.37147e+06	1.27859e+06	1.28026e+06	1.5541e+06	1.31434e+06	5.47065e+08	3.01523e+07
12	330	1.34475e+06	1.28207e+06	1.27016e+06	1.56622e+06	1.29796e+06	5.44017e+08	2.9985e+07
13	360	1.39343e+06	1.29044e+06	1.29162e+06	1.63779e+06	1.33797e+06	5.49148e+08	3.01797e+07
14	390	1.39085e+06	1.27756e+06	1.2961e+06	1.63374e+06	1.38532e+06	5.4998e+08	3.02061e+07
15	690	1.34532e+06	1.30414e+06	1.28198e+06	1.59694e+06	1.40309e+06	5.49843e+08	3.01137e+07
16	990	1.3926e+06	1.29866e+06	1.34315e+06	1.60927e+06	1.3949e+06	5.47577e+08	3.00228e+07
17	1290	1.36643e+06	1.30147e+06	1.35629e+06	1.5512e+06	1.41034e+06	5.47462e+08	2.99974e+07
18	1590	1.38272e+06	1.34175e+06	1.3113e+06	1.52877e+06	1.39799e+06	5.4597e+08	3.00267e+07
19	1890	1.37846e+06	1.34957e+06	1.31696e+06	1.55591e+06	1.40028e+06	5.49316e+08	3.00318e+07
20	2190	1.356e+06	1.31711e+06	1.35989e+06	1.57363e+06	1.36331e+06	5.46884e+08	2.98684e+07
21	2490	1.33448e+06	1.32564e+06	1.35023e+06	1.56935e+06	1.38671e+06	5.43428e+08	2.98906e+07
22	2790	1.31298e+06	1.33522e+06	1.32553e+06	1.56595e+06	1.42247e+06	5.43347e+08	2.98269e+07
23	3090	1.36253e+06	1.39683e+06	1.31301e+06	1.59463e+06	1.42622e+06	5.43995e+08	2.98947e+07
24	3390	1.33643e+06	1.37013e+06	1.33057e+06	1.60455e+06	1.46097e+06	5.40254e+08	2.9751e+07
25	3690	1.32933e+06	1.41723e+06	1.31539e+06	1.56797e+06	1.45641e+06	5.397e+08	2.96941e+07
26	3990	1.35895e+06	1.45193e+06	1.31127e+06	1.59543e+06	1.46139e+06	5.4254e+08	2.98377e+07
27	4290	1.34748e+06	1.41047e+06	1.28629e+06	1.54366e+06	1.41508e+06	5.39538e+08	2.97897e+07
28	4590	1.34173e+06	1.39535e+06	1.29191e+06	1.58873e+06	1.43318e+06	5.43887e+08	2.98695e+07
		Background corrected Data
	Time_(sec)	Roi1-bkgd-corr	Roi2-bkgd-corr	Roi3-bkgd-corr	Roi4-bkgd-corr	Roi5-bkgd-corr	Ref_fluo-bkgd-corr
1	0	715920	437648	430942	770942	684988	1.46461e+08
2	30	721197	422603	441322	779257	723287	1.48712e+08
3	60	709620	418149	423629	788298	695479	1.51699e+08
4	90	770433	421156	411680	801160	679431	1.5079e+08
5	120	706797	423737	418201	773495	696348	1.5201e+08
6	150	707471	418868	442738	741554	687656	1.50188e+08
7	180	694264	446473	433581	774574	710517	1.48487e+08
8	210	262633	158926	261271	545280	212018	1.46472e+08
9	240	312939	165967	256331	549806	252956	1.46293e+08
10	270	308654	184670	260702	534432	268910	1.44861e+08
11	300	353976	261093	262768	536608	296843	1.46763e+08
12	330	332903	270224	258312	554378	286115	1.45936e+08
13	360	375009	272024	273204	619377	319556	1.48482e+08
14	390	371545	258253	276787	614431	366007	1.48964e+08
15	690	329133	287955	265789	580756	386904	1.50055e+08
16	990	379480	285535	330027	596148	381776	1.48995e+08
17	1290	354160	289206	344022	538933	398070	1.49217e+08
18	1590	369472	328502	298048	515515	384734	1.47337e+08
19	1890	365034	336144	303529	542485	386855	1.50614e+08
20	2190	348091	309196	351975	565716	355400	1.50351e+08
21	2490	325817	316975	341572	560690	378043	1.46601e+08
22	2790	306473	328710	319016	559440	415957	1.47366e+08
23	3090	353731	388034	304209	585826	417424	1.47113e+08
24	3390	332482	366182	326619	600604	457023	1.4528e+08
25	3690	327302	415206	313366	565939	454379	1.45482e+08
26	3990	352069	445048	304397	588548	454508	1.46415e+08
27	4290	342225	405209	281037	538400	409820	1.4405e+08
28	4590	333777	387400	283960	580782	425232	1.47339e+08
		Bleaching Corrected Data
	Time_(sec)	Roi1-bkgd_bleach-corr	Roi2-bkgd_bleach-corr	Roi3-bkgd_bleach-corr	Roi4-bkgd_bleach-corr	Roi5-bkgd_bleach-corr
1	0	0.00488812	0.00298815	0.00294236	0.00526379	0.00467692
2	30	0.00484964	0.00284176	0.00296764	0.00524006	0.00486369
3	60	0.00467781	0.00275644	0.00279256	0.00519646	0.0045846
4	90	0.00510932	0.002793	0.00273016	0.00531309	0.00450581
5	120	0.00464969	0.00278757	0.00275115	0.00508846	0.00458095
6	150	0.00471058	0.00278896	0.0029479	0.00493751	0.00457864
7	180	0.00467559	0.00300682	0.00291999	0.00521645	0.00478505
8	210	0.00179305	0.00108503	0.00178375	0.00372275	0.00144749
9	240	0.00213913	0.00113449	0.00175218	0.00375827	0.00172911
10	270	0.00213069	0.0012748	0.00179966	0.00368926	0.00185633
11	300	0.00241188	0.00177901	0.00179042	0.00365628	0.00202259
12	330	0.00228116	0.00185166	0.00177003	0.00379877	0.00196055
13	360	0.00252561	0.00183203	0.00183997	0.00417139	0.00215215
14	390	0.0024942	0.00173366	0.00185808	0.00412471	0.00245702
15	690	0.00219342	0.001919	0.00177128	0.00387029	0.00257842
16	990	0.00254693	0.0019164	0.00221501	0.00400112	0.00256233
17	1290	0.00237346	0.00193816	0.00230552	0.00361175	0.00266773
18	1590	0.00250767	0.0022296	0.00202291	0.00349889	0.00261125
19	1890	0.00242364	0.00223183	0.00201528	0.00360183	0.00256852
20	2190	0.00231519	0.0020565	0.00234103	0.00376265	0.00236381
21	2490	0.00222248	0.00216217	0.00232995	0.00382461	0.00257873
22	2790	0.00207968	0.00223058	0.00216479	0.00379627	0.00282262
23	3090	0.00240449	0.00263766	0.00206786	0.00398215	0.00283744
24	3390	0.00228856	0.00252052	0.0022482	0.00413411	0.0031458
25	3690	0.00224978	0.00285401	0.00215399	0.0038901	0.00312327
26	3990	0.00240461	0.00303965	0.00207901	0.00401974	0.00310426
27	4290	0.00237573	0.00281298	0.00195097	0.00373758	0.00284498
28	4590	0.00226536	0.0026293	0.00192725	0.0039418	0.00288607
		Normalized Data
	Time_(sec)	Roi1_corr_norm	Roi2_corr_norm	Roi3_corr_norm	Roi4_corr_norm	Roi5_corr_norm
1	0	1	1	1	1	1
2	30	0.992128	0.95101	1.00859	0.99549	1.03993
3	60	0.956976	0.922457	0.949088	0.987208	0.980259
4	90	1.04525	0.934693	0.927881	1.00937	0.963414
5	120	0.951222	0.932875	0.935012	0.966691	0.979479
6	150	0.963679	0.933341	1.00188	0.938014	0.978985
7	180	0.956521	1.00625	0.992397	0.991005	1.02312
8	210	0.366819	0.363109	0.606232	0.707237	0.309497
9	240	0.437618	0.379663	0.595502	0.713984	0.369712
10	270	0.435891	0.426619	0.611639	0.700875	0.396912
11	300	0.493417	0.595355	0.608496	0.694609	0.432463
12	330	0.466674	0.619667	0.601569	0.721679	0.419197
13	360	0.516684	0.613097	0.625339	0.792467	0.460163
14	390	0.510257	0.580179	0.631493	0.783599	0.52535
15	690	0.448725	0.642203	0.601992	0.735267	0.551306
16	990	0.521044	0.641333	0.7528	0.76012	0.547867
17	1290	0.485557	0.648615	0.78356	0.686149	0.570403
18	1590	0.513014	0.746147	0.687511	0.664708	0.558327
19	1890	0.495823	0.746893	0.684919	0.684265	0.54919
20	2190	0.473637	0.688219	0.795629	0.714816	0.505419
21	2490	0.45467	0.72358	0.791863	0.726588	0.551373
22	2790	0.425456	0.746474	0.735732	0.721204	0.603521
23	3090	0.491905	0.882707	0.70279	0.756518	0.606689
24	3390	0.468188	0.843506	0.764079	0.785385	0.672622
25	3690	0.460255	0.955108	0.73206	0.73903	0.667805
26	3990	0.491929	1.01723	0.706578	0.763657	0.663739
27	4290	0.486022	0.941377	0.663062	0.710055	0.608302
28	4590	0.463442	0.879909	0.655	0.748851	0.617088
		Normalize the bouton fluorescent right after bleaching to 0
	Recovery Time_(sec)
1	0	0	0	0	0	0
2	30	0.115308	0.0279976	-0.0292123	0.0243819	0.0878374
3	60	0.112494	0.107414	0.0147205	-0.0229892	0.127515
4	90	0.206184	0.392794	0.00616503	-0.0456332	0.179373
5	120	0.162628	0.433912	-0.0126942	0.0521875	0.160023
6	150	0.244078	0.422802	0.0520191	0.307991	0.219781
7	180	0.23361	0.367127	0.0687718	0.275945	0.314871
8	480	0.133396	0.472028	-0.0115431	0.101291	0.352734
9	780	0.251179	0.470557	0.399023	0.1911	0.347716
10	1080	0.193382	0.482872	0.482765	-0.0762026	0.38059
11	1380	0.238101	0.647827	0.221277	-0.153681	0.362975
12	1680	0.210102	0.649088	0.214222	-0.0830124	0.349647
13	1980	0.173969	0.549854	0.515621	0.0273894	0.285797
14	2280	0.143078	0.609659	0.505368	0.0699281	0.352831
15	2580	0.0954992	0.64838	0.352556	0.0504726	0.4289
16	2880	0.203721	0.878789	0.262873	0.178083	0.433521
17	3180	0.165095	0.812489	0.429729	0.282399	0.5297
18	3480	0.152175	1.00124	0.342559	0.114888	0.522673
19	3780	0.20376	1.10631	0.273187	0.203883	0.516742
20	4080	0.19414	0.978017	0.154717	0.0101853	0.435875
21	4380	0.157365	0.874057	0.132769	0.150378	0.448691

## Sheet: WT-1014-C1
		Raw Data
	Time_(sec)	Roi1	Roi2	Roi3	Roi4	Roi5	Ref_fluo	Background
1	0	1829776	1990436	2178408	1777308	1589168	676744816	20342215
2	30	1.83022e+06	2.09951e+06	2.24178e+06	1.81854e+06	1.67581e+06	6.84885e+08	2.03503e+07
3	60	1.87888e+06	2.18677e+06	2.22033e+06	1.80408e+06	1.63635e+06	6.90832e+08	2.03779e+07
4	90	1.84145e+06	2.10424e+06	2.21581e+06	1.79762e+06	1.6525e+06	6.88748e+08	2.03819e+07
5	120	1.85566e+06	2.09748e+06	2.26466e+06	1.80185e+06	1.69911e+06	6.87292e+08	2.03617e+07
6	150	1.90342e+06	1.91676e+06	2.27448e+06	1.84474e+06	1.67363e+06	6.86903e+08	2.03479e+07
7	180	1.8199e+06	2.01337e+06	2.18762e+06	1.78557e+06	1.65144e+06	6.82999e+08	2.03771e+07
8	210	1.17817e+06	1.27447e+06	1.37055e+06	1.36802e+06	1.4874e+06	6.80329e+08	2.02894e+07
9	240	1.22584e+06	1.32434e+06	1.43151e+06	1.46337e+06	1.55123e+06	6.84662e+08	2.03352e+07
10	270	1.25738e+06	1.35418e+06	1.55088e+06	1.44604e+06	1.55256e+06	6.8577e+08	2.03409e+07
11	300	1.24891e+06	1.45433e+06	1.47745e+06	1.4652e+06	1.60563e+06	6.87884e+08	2.03352e+07
12	330	1.22104e+06	1.45026e+06	1.56465e+06	1.45651e+06	1.55302e+06	6.75112e+08	2.02739e+07
13	360	1.24126e+06	1.39209e+06	1.48457e+06	1.48564e+06	1.56523e+06	6.79091e+08	2.035e+07
14	390	1.24842e+06	1.40234e+06	1.6314e+06	1.48694e+06	1.57282e+06	6.75038e+08	2.02537e+07
15	690	1.31785e+06	1.62293e+06	1.48609e+06	1.60894e+06	1.658e+06	6.91895e+08	2.03771e+07
16	990	1.28433e+06	1.48593e+06	1.65844e+06	1.63452e+06	1.62266e+06	6.76642e+08	2.03716e+07
17	1290	1.33279e+06	1.52862e+06	1.61787e+06	1.64733e+06	1.59638e+06	6.78268e+08	2.04089e+07
18	1590	1.38112e+06	1.59972e+06	1.71172e+06	1.76888e+06	1.64889e+06	6.88049e+08	2.04126e+07
19	1890	1.37622e+06	1.50732e+06	1.74865e+06	1.69995e+06	1.58037e+06	6.82269e+08	2.03645e+07
20	2190	1.3768e+06	1.50313e+06	1.68242e+06	1.594e+06	1.63846e+06	6.8192e+08	2.04204e+07
21	2490	1.47585e+06	1.55474e+06	1.654e+06	1.67476e+06	1555396	6.78957e+08	2.03235e+07
22	2790	1.41123e+06	1.50942e+06	1.64593e+06	1.7284e+06	1.68356e+06	6.75993e+08	2.03383e+07
23	3090	1.386e+06	1.47848e+06	1.70645e+06	1.74853e+06	1.76645e+06	6.76076e+08	2.0248e+07
24	3390	1.32194e+06	1.513e+06	1.67786e+06	1.8826e+06	1.74379e+06	6.7123e+08	2.02109e+07
25	3690	1.34749e+06	1.58921e+06	1.82214e+06	1.69976e+06	1.6723e+06	6.79214e+08	2.03659e+07
26	3990	1.38665e+06	1.65607e+06	1.87542e+06	1.6285e+06	1.67154e+06	6.86944e+08	2.04385e+07
27	4290	1.47725e+06	1.68165e+06	1.87791e+06	1.72521e+06	1.63075e+06	6.92057e+08	2.0442e+07
28	4590	1.37456e+06	1.49633e+06	1.70738e+06	1.69566e+06	1.55127e+06	6.79684e+08	2.04228e+07
		Background corrected Data
	Time_(sec)	Roi1-bkgd-corr	Roi2-bkgd-corr	Roi3-bkgd-corr	Roi4-bkgd-corr	Roi5-bkgd-corr	Ref_fluo-bkgd-corr
1	0	835307	995967	1.18394e+06	782839	594699	2.31027e+08
2	30	835357	1.10465e+06	1.24691e+06	823677	680942	2.3899e+08
3	60	882673	1.19056e+06	1.22412e+06	807865	640137	2.44333e+08
4	90	845037	1.10783e+06	1.2194e+06	801212	656088	2.42161e+08
5	120	860245	1.10206e+06	1.26924e+06	806430	703695	2.41148e+08
6	150	908676	922011	1.27973e+06	849999	678884	2.41062e+08
7	180	823724	1.0172e+06	1.19145e+06	789395	655266	2.36518e+08
8	210	186283	282585	378663	376129	495508	2.35768e+08
9	240	231720	330212	437386	469244	557107	2.39099e+08
10	270	262971	359770	556470	451638	558156	2.40081e+08
11	300	254783	460205	483322	471067	611503	2.42319e+08
12	330	229912	459129	573525	465381	561889	2.30893e+08
13	360	246410	397238	489721	490789	570385	2.33203e+08
14	390	258284	412198	641264	496804	582677	2.31261e+08
15	690	321680	626762	489916	612763	661827	2.45414e+08
16	990	288429	490029	662536	638619	626755	2.30281e+08
17	1290	335064	530891	620141	649600	598646	2.31089e+08
18	1590	383207	601813	713805	770971	650976	2.40789e+08
19	1890	380668	511765	753091	704392	584813	2.36064e+08
20	2190	378508	504840	684126	595714	640168	2.3449e+08
21	2490	482300	561186	660443	681206	561844	2.33651e+08
22	2790	416951	515145	651655	734123	689277	2.30361e+08
23	3090	396132	488613	716581	758666	776585	2.32423e+08
24	3390	333888	524956	689818	894555	755743	2.28391e+08
25	3690	351868	593589	826513	704139	676674	2.32978e+08
26	3990	387475	656889	876246	629318	672366	2.39116e+08
27	4290	477903	682307	878559	725858	631401	2.44153e+08
28	4590	376151	497918	708973	697257	552866	2.32202e+08
		Bleaching Corrected Data
	Time_(sec)	Roi1-bkgd_bleach-corr	Roi2-bkgd_bleach-corr	Roi3-bkgd_bleach-corr	Roi4-bkgd_bleach-corr	Roi5-bkgd_bleach-corr
1	0	0.00361562	0.00431103	0.00512467	0.00338851	0.00257415
2	30	0.00349536	0.00462214	0.00521742	0.00344649	0.00284925
3	60	0.00361258	0.0048727	0.00501003	0.00330641	0.00261994
4	90	0.00348957	0.00457478	0.0050355	0.0033086	0.00270931
5	120	0.00356729	0.00457007	0.00526332	0.00334412	0.0029181
6	150	0.00376947	0.00382479	0.00530874	0.00352606	0.00281622
7	180	0.00348271	0.00430073	0.00503743	0.00333756	0.00277046
8	210	0.00079011	0.00119857	0.00160608	0.00159534	0.00210168
9	240	0.000969137	0.00138107	0.00182931	0.00196255	0.00233003
10	270	0.00109534	0.00149854	0.00231784	0.00188119	0.00232487
11	300	0.00105144	0.00189917	0.00199457	0.001944	0.00252354
12	330	0.000995751	0.00198849	0.00248395	0.00201557	0.00243355
13	360	0.00105663	0.0017034	0.00209998	0.00210456	0.00244588
14	390	0.00111685	0.0017824	0.0027729	0.00214824	0.00251957
15	690	0.00131076	0.00255389	0.00199628	0.00249685	0.00269677
16	990	0.00125251	0.00212796	0.00287708	0.00277321	0.0027217
17	1290	0.00144994	0.00229734	0.00268356	0.00281104	0.00259054
18	1590	0.00159147	0.00249934	0.00296445	0.00320186	0.00270352
19	1890	0.00161256	0.00216791	0.0031902	0.00298391	0.00247735
20	2190	0.00161418	0.00215293	0.00291751	0.00254047	0.00273005
21	2490	0.00206419	0.00240182	0.00282663	0.00291549	0.00240463
22	2790	0.00180999	0.00223625	0.00282884	0.00318684	0.00299216
23	3090	0.00170436	0.00210226	0.00308309	0.00326416	0.00334126
24	3390	0.00146192	0.0022985	0.00302034	0.00391677	0.00330899
25	3690	0.0015103	0.00254783	0.00354759	0.00302234	0.00290445
26	3990	0.00162045	0.00274715	0.00366452	0.00263185	0.00281188
27	4290	0.00195739	0.00279459	0.0035984	0.00297297	0.00258609
28	4590	0.00161993	0.00214433	0.00305326	0.00300281	0.00238097
		Normalized Data
	Time_(sec)	Roi1_corr_norm	Roi2_corr_norm	Roi3_corr_norm	Roi4_corr_norm	Roi5_corr_norm
1	0	1	1	1	1	1
2	30	0.96674	1.07217	1.0181	1.01711	1.10687
3	60	0.999159	1.13029	0.977631	0.97577	1.01779
4	90	0.965139	1.06118	0.9826	0.976416	1.05251
5	120	0.986632	1.06009	1.02706	0.986901	1.13362
6	150	1.04255	0.887209	1.03592	1.04059	1.09404
7	180	0.963239	0.997609	0.982977	0.984964	1.07626
8	210	0.218527	0.278024	0.313402	0.470807	0.816455
9	240	0.268042	0.320356	0.356961	0.579178	0.905164
10	270	0.302948	0.347605	0.452291	0.555167	0.90316
11	300	0.290804	0.440538	0.389209	0.573702	0.980341
12	330	0.275403	0.461257	0.484704	0.594825	0.945381
13	360	0.292242	0.395126	0.409778	0.621085	0.950168
14	390	0.308897	0.41345	0.54109	0.633978	0.978796
15	690	0.362528	0.592408	0.389543	0.736858	1.04764
16	990	0.346417	0.493609	0.561417	0.818417	1.05732
17	1290	0.40102	0.532898	0.523655	0.829579	1.00637
18	1590	0.440165	0.579754	0.578467	0.944916	1.05026
19	1890	0.445999	0.502875	0.622519	0.880595	0.962396
20	2190	0.446445	0.4994	0.569307	0.749731	1.06056
21	2490	0.57091	0.557133	0.551573	0.860404	0.934146
22	2790	0.500603	0.518728	0.552005	0.940483	1.16239
23	3090	0.471388	0.487646	0.601618	0.963302	1.29801
24	3390	0.404333	0.533166	0.589372	1.1559	1.28547
25	3690	0.417717	0.591002	0.692258	0.891936	1.12831
26	3990	0.44818	0.637237	0.715074	0.776698	1.09235
27	4290	0.541372	0.648241	0.702172	0.877366	1.00464
28	4590	0.448037	0.497405	0.595797	0.886173	0.924955
		Normalize the bouton fluorescent right after bleaching to 0
	Recovery Time_(sec)
1	0	0	0	0	0	0
2	30	0.0642602	0.0563105	0.0631227	0.205799	0.351643
3	60	0.109561	0.0925566	0.201269	0.160202	0.343696
4	90	0.0938006	0.216175	0.109855	0.1954	0.649643
5	120	0.0738128	0.243736	0.248239	0.235513	0.511059
6	150	0.0956667	0.155769	0.139662	0.285382	0.530037
7	180	0.117281	0.180143	0.32995	0.309865	0.643519
8	480	0.186883	0.418194	0.110338	0.505237	0.916399
9	780	0.165975	0.28677	0.359407	0.660119	0.954781
10	1080	0.236838	0.339034	0.304685	0.681315	0.752811
11	1380	0.28764	0.401361	0.384114	0.900344	0.926783
12	1680	0.295212	0.299097	0.447952	0.778197	0.578509
13	1980	0.295791	0.294474	0.37084	0.529683	0.967642
14	2280	0.45732	0.371271	0.345141	0.739854	0.466527
15	2580	0.366076	0.320184	0.345768	0.891925	1.37128
16	2880	0.328162	0.278839	0.417664	0.93526	1.90886
17	3180	0.241138	0.33939	0.399918	1.301	1.85916
18	3480	0.258507	0.416323	0.549014	0.799734	1.2362
19	3780	0.298042	0.477825	0.582077	0.580894	1.09365
20	4080	0.418986	0.492463	0.56338	0.772065	0.745954
21	4380	0.297857	0.291821	0.409228	0.78879	0.430094

## Sheet: WT-1108-C1
		Raw Data
	Time_(sec)	Roi1	Roi2	Roi3	Roi4	Roi5	Ref_fluo	Background
1	0	1438017	1957375	1953894	1470861	1969825	1145064721	16808246
2	30	1.39945e+06	2.02189e+06	1.97969e+06	1.50983e+06	1.97903e+06	1.15577e+09	1.68826e+07			Filter out Roi2 due to large abrupt change, Roi4 due to wrong targeting.
3	60	1.51486e+06	2.00806e+06	1.9867e+06	1.54238e+06	2.00096e+06	1.1595e+09	1.68917e+07
4	90	1.49294e+06	2.00049e+06	1.95073e+06	1.51233e+06	1.98895e+06	1.16694e+09	1.68768e+07
5	120	1.48098e+06	1.94191e+06	1.96293e+06	1.51058e+06	2.01703e+06	1.16741e+09	1.69253e+07
6	150	1.46649e+06	2.04573e+06	1.89953e+06	1.57724e+06	2.01908e+06	1.15974e+09	1.68772e+07
7	180	1.56298e+06	2.07329e+06	1.90669e+06	1.53969e+06	1.97833e+06	1.16234e+09	1.68549e+07
8	210	1.17261e+06	1.40498e+06	1.15645e+06	1.176e+06	1.19185e+06	1.1581e+09	1.67752e+07
9	240	1.26991e+06	1.47598e+06	1.23262e+06	1.22271e+06	1.25333e+06	1.16185e+09	1.69504e+07
10	270	1.27805e+06	1.48902e+06	1.27987e+06	1.23269e+06	1.30181e+06	1.15928e+09	1.68639e+07
11	300	1.3884e+06	1.51063e+06	1.30445e+06	1.26289e+06	1.30087e+06	1.15761e+09	1.68048e+07
12	330	1.40475e+06	1.52304e+06	1.30643e+06	1.25085e+06	1.30154e+06	1.15399e+09	1.68399e+07
13	360	1.42271e+06	1.44592e+06	1.28908e+06	1.2673e+06	1.31146e+06	1.15047e+09	1.68334e+07
14	390	1.37444e+06	1.4206e+06	1.32419e+06	1.2777e+06	1.31323e+06	1.14497e+09	1.67836e+07
15	690	1.45349e+06	1.40959e+06	1.39496e+06	1.26092e+06	1.36613e+06	1.17274e+09	1.6954e+07
16	990	1.41687e+06	1.50652e+06	1.38859e+06	1.29468e+06	1.44241e+06	1.18416e+09	1.69582e+07
17	1290	1.62077e+06	1.50293e+06	1.44127e+06	1.27641e+06	1.42829e+06	1.18576e+09	1.6917e+07
18	1590	1.57067e+06	1.62761e+06	1.51483e+06	1.29845e+06	1.57696e+06	1.20299e+09	1.70138e+07
19	1890	1.68583e+06	1.62224e+06	1.48465e+06	1.28147e+06	1.57601e+06	1.19464e+09	1.69718e+07
20	2190	1.56472e+06	1.6975e+06	1.44926e+06	1.32834e+06	1.65264e+06	1.19805e+09	1.68781e+07
21	2490	1.46807e+06	1.86312e+06	1.51798e+06	1.32196e+06	1.61259e+06	1.19691e+09	1.70212e+07
22	2790	1.56095e+06	1.7394e+06	1.53519e+06	1.32187e+06	1.64655e+06	1.20231e+09	1.70454e+07
23	3090	1.68068e+06	1.80689e+06	1.50278e+06	1.31084e+06	1.67836e+06	1.20423e+09	1.70122e+07
24	3390	1.61816e+06	1.85548e+06	1.4905e+06	1.32571e+06	1.74092e+06	1.20314e+09	1.70495e+07
25	3690	1.65476e+06	1.82053e+06	1.47656e+06	1.30253e+06	1.71302e+06	1.20452e+09	1.69959e+07
26	3990	1.69166e+06	1.86322e+06	1.47457e+06	1.29602e+06	1.78399e+06	1.20741e+09	1.69587e+07
27	4290	1.70003e+06	1.72871e+06	1.44006e+06	1.33075e+06	1.78995e+06	1.21031e+09	1.69747e+07
28	4590	1.47692e+06	1.91167e+06	1.40159e+06	1.29182e+06	1.80092e+06	1.19837e+09	1.6989e+07
		Background corrected Data
	Time_(sec)	Roi1-bkgd-corr	Roi2-bkgd-corr	Roi3-bkgd-corr	Roi4-bkgd-corr	Roi5-bkgd-corr	Ref_fluo-bkgd-corr
1	0	435608	954966	951485	468452	967416	2.72056e+08
2	30	392611	1.01505e+06	972851	502987	972193	2.78899e+08
3	60	507473	1.00067e+06	979313	534995	993570	2.82152e+08
4	90	486444	993999	944239	505830	982455	2.90376e+08
5	120	471590	932527	953544	501189	1.00764e+06	2.8832e+08
6	150	459972	1.03921e+06	893014	570724	1.01256e+06	2.83148e+08
7	180	557783	1.06809e+06	901497	534493	973133	2.86906e+08
8	210	172174	404542	156011	175557	191407	2.86806e+08
9	240	259027	465096	221730	211828	242446	2.8146e+08
10	270	272315	483289	274135	226961	296079	2.83382e+08
11	300	386195	508426	302246	260685	298672	2.84778e+08
12	330	400455	518749	302131	246559	297250	2.7934e+08
13	360	418797	442008	285168	263390	307551	2.76152e+08
14	390	373495	419657	323249	276763	312291	2.73242e+08
15	690	442387	398491	383859	249817	355028	2.92158e+08
16	990	405524	495166	377239	283335	431058	3.0336e+08
17	1290	611877	494032	432378	267516	419394	3.07102e+08
18	1590	556000	612940	500166	283781	562288	3.19303e+08
19	1890	673664	610074	472488	269307	563840	3.13134e+08
20	2190	558143	690924	442682	321764	646069	3.21415e+08
21	2490	452965	848011	502876	306853	597483	3.12844e+08
22	2790	544402	722854	518637	305320	630000	3.16986e+08
23	3090	666109	792316	488214	296275	663790	3.20626e+08
24	3390	601367	838684	473707	308913	724121	3.17597e+08
25	3690	641160	806929	462957	288932	699420	3.21759e+08
26	3990	680283	851843	463186	284636	772607	3.26594e+08
27	4290	687694	716373	427726	318417	777616	3.28662e+08
28	4590	463737	898486	388401	278631	787737	3.1597e+08
		Bleaching Corrected Data
	Time_(sec)	Roi1-bkgd_bleach-corr	Roi2-bkgd_bleach-corr	Roi3-bkgd_bleach-corr	Roi4-bkgd_bleach-corr	Roi5-bkgd_bleach-corr
1	0	0.00160117	0.00351018	0.00349738	0.00172189	0.00355594
2	30	0.00140772	0.00363951	0.00348819	0.00180347	0.00348583
3	60	0.00179858	0.00354656	0.00347087	0.00189612	0.0035214
4	90	0.00167522	0.00342315	0.00325178	0.00174198	0.00338339
5	120	0.00163565	0.00323434	0.00330724	0.00173831	0.00349486
6	150	0.00162449	0.00367019	0.00315388	0.00201564	0.00357609
7	180	0.00194413	0.0037228	0.00314213	0.00186296	0.00339182
8	210	0.000600314	0.00141051	0.000543959	0.00061211	0.000667375
9	240	0.000920298	0.00165244	0.000787786	0.000752603	0.000861388
10	270	0.000960946	0.00170543	0.000967369	0.000800902	0.00104481
11	300	0.00135613	0.00178534	0.00106134	0.000915397	0.00104879
12	330	0.00143358	0.00185705	0.00108159	0.000882649	0.00106411
13	360	0.00151655	0.0016006	0.00103265	0.000953785	0.0011137
14	390	0.0013669	0.00153584	0.00118301	0.00101289	0.00114291
15	690	0.00151421	0.00136396	0.00131388	0.000855074	0.00121519
16	990	0.00133677	0.00163227	0.00124353	0.00093399	0.00142095
17	1290	0.00199242	0.00160869	0.00140793	0.000871099	0.00136565
18	1590	0.00174129	0.00191962	0.00156643	0.000888752	0.00176099
19	1890	0.00215136	0.00194828	0.0015089	0.000860037	0.00180064
20	2190	0.00173652	0.00214963	0.00137729	0.00100108	0.00201008
21	2490	0.00144789	0.00271065	0.00160743	0.00098085	0.00190984
22	2790	0.00171743	0.0022804	0.00163615	0.000963197	0.00198747
23	3090	0.00207753	0.00247115	0.00152269	0.000924052	0.00207029
24	3390	0.00189349	0.00264072	0.00149154	0.000972656	0.00228
25	3690	0.00199267	0.00250787	0.00143883	0.000897975	0.00217373
26	3990	0.00208296	0.00260826	0.00141823	0.00087153	0.00236565
27	4290	0.0020924	0.00217966	0.00130141	0.000968828	0.002366
28	4590	0.00146766	0.00284358	0.00122923	0.000881827	0.00249307
		Normalized Data
	Time_(sec)	Roi1_corr_norm	Roi2_corr_norm	Roi3_corr_norm	Roi4_corr_norm	Roi5_corr_norm
1	0	1	1	1	1	1
2	30	0.879183	1.03684	0.997371	1.04738	0.980283
3	60	1.12329	1.01036	0.992418	1.10118	0.990285
4	90	1.04625	0.975205	0.929775	1.01167	0.951474
5	120	1.02153	0.921418	0.945632	1.00953	0.982824
6	150	1.01457	1.04559	0.901783	1.17059	1.00567
7	180	1.21419	1.06057	0.898423	1.08192	0.953845
8	210	0.374922	0.401834	0.155533	0.355486	0.187679
9	240	0.574766	0.470756	0.22525	0.437078	0.242239
10	270	0.600153	0.485854	0.276598	0.465128	0.29382
11	300	0.84696	0.508617	0.303466	0.531622	0.294939
12	330	0.89533	0.529048	0.309256	0.512603	0.299249
13	360	0.947148	0.455987	0.295263	0.553916	0.313194
14	390	0.853687	0.437539	0.338257	0.588239	0.321408
15	690	0.945688	0.388572	0.375674	0.496589	0.341736
16	990	0.834873	0.465011	0.355561	0.54242	0.399597
17	1290	1.24436	0.458293	0.402567	0.505895	0.384048
18	1590	1.08751	0.546872	0.447887	0.516147	0.495223
19	1890	1.34362	0.555038	0.431436	0.499471	0.506373
20	2190	1.08453	0.612399	0.393806	0.581385	0.565273
21	2490	0.904273	0.772225	0.45961	0.569634	0.537085
22	2790	1.07261	0.649653	0.467822	0.559382	0.558915
23	3090	1.29751	0.703996	0.43538	0.536648	0.582206
24	3390	1.18257	0.752303	0.426472	0.564876	0.64118
25	3690	1.24451	0.714455	0.411402	0.521504	0.611297
26	3990	1.3009	0.743057	0.405513	0.506146	0.665267
27	4290	1.3068	0.620955	0.372111	0.562652	0.665366
28	4590	0.916617	0.810095	0.351472	0.512126	0.701101
		Normalize the bouton fluorescent right after bleaching to 0
	Recovery Time_(sec)
1	0	0	0	0	0	0
2	30	0.299259	0.113864	0.0875109	0.11576	0.0688069
3	60	0.337275	0.138806	0.151964	0.155556	0.133857
4	90	0.706861	0.176412	0.18569	0.249895	0.135268
5	120	0.779293	0.210164	0.192958	0.222912	0.140704
6	150	0.856889	0.089464	0.175393	0.281525	0.15829
7	180	0.716935	0.0589867	0.22936	0.330221	0.168649
8	480	0.854703	-0.0219095	0.276328	0.200191	0.194284
9	780	0.688762	0.104373	0.251081	0.265214	0.267255
10	1080	1.30195	0.0932741	0.310085	0.213395	0.247645
11	1380	1.06708	0.239611	0.366971	0.22794	0.387851
12	1680	1.45059	0.253102	0.346322	0.20428	0.401912
13	1980	1.06262	0.347865	0.299087	0.320497	0.476191
14	2280	0.792685	0.611906	0.381686	0.303825	0.440643
15	2580	1.04477	0.409411	0.391994	0.28928	0.468174
16	2880	1.38154	0.499188	0.351272	0.257026	0.497546
17	3180	1.20942	0.578993	0.34009	0.297074	0.571919
18	3480	1.30218	0.516467	0.321174	0.23554	0.534233
19	3780	1.38662	0.563719	0.313782	0.213751	0.602296
20	4080	1.39545	0.361999	0.271855	0.293919	0.60242
21	4380	0.811171	0.67447	0.245949	0.222235	0.647487

## Sheet: WT-1110
		Raw Data
	Time_(sec)	Roi1	Roi2	Roi3	Roi4	Roi5	Ref_fluo	Background
1	0	2404458	2641479	2254832	3465343	2920933	1260454875	19373008
2	30	2.47353e+06	2.65939e+06	2.20126e+06	3.46371e+06	2.8484e+06	1268451996	1.93806e+07
3	60	2.49839e+06	2.61261e+06	2.23363e+06	3.56381e+06	2.87852e+06	1272602704	1.93696e+07
4	90	2.45288e+06	2.70048e+06	2.28264e+06	3.49916e+06	2.8863e+06	1265800288	1.927e+07
5	120	2.513e+06	2.73293e+06	2.24193e+06	3.53369e+06	2.84389e+06	1272123542	1.94598e+07
6	150	2.49984e+06	2.64835e+06	2.27049e+06	3.43306e+06	2.8444e+06	1266751904	1.93825e+07
7	180	2.4818e+06	2.64745e+06	2.23606e+06	3.49722e+06	2.933e+06	1276087756	1.9356e+07
8	210	1.76609e+06	1.8723e+06	1.79299e+06	2.28069e+06	1.94691e+06	1263890408	1.94588e+07
9	240	1.88167e+06	2.06426e+06	1.85254e+06	2.37728e+06	2.03889e+06	1269139239	1.93312e+07
10	270	1.94558e+06	2.07658e+06	1.84603e+06	2.43927e+06	2.16166e+06	1261991637	1.93572e+07
11	300	2.04589e+06	2.14197e+06	1.83521e+06	2.49462e+06	2.20284e+06	1272997393	1.94461e+07
12	330	2.05438e+06	2.11966e+06	1.85175e+06	2.52674e+06	2.21459e+06	1276311272	1.93198e+07
13	360	2.06525e+06	2.0674e+06	1.8521e+06	2.73252e+06	2.19845e+06	1275238407	1.93133e+07
14	390	2.026e+06	2.07634e+06	1.8535e+06	2.71537e+06	2.20884e+06	1274300537	1.93491e+07
15	690	2.16869e+06	2.14677e+06	1.92597e+06	2.6746e+06	2.32946e+06	1288692745	1.9248e+07
16	990	2.21449e+06	2.1911e+06	1.94212e+06	2.91432e+06	2.34006e+06	1302436250	1.9496e+07
17	1290	2.27946e+06	2.22982e+06	1.96176e+06	2.96328e+06	2.55055e+06	1312876968	1.93773e+07
18	1590	2.36707e+06	2.28853e+06	2.00626e+06	2.97819e+06	2.6062e+06	1303383508	1.92763e+07
19	1890	2.4864e+06	2.28245e+06	1.99109e+06	3.21187e+06	2.64461e+06	1307065629	1.92773e+07
20	2190	2.39928e+06	2.27562e+06	2.08805e+06	3.22456e+06	2.75107e+06	1325408066	1.93775e+07
21	2490	2.42784e+06	2.28528e+06	2.0168e+06	3.26767e+06	2.63753e+06	1312676793	1.92814e+07
22	2790	2.50892e+06	2.34602e+06	2.10969e+06	3.09926e+06	2.64165e+06	1313507192	1.93364e+07
23	3090	2.51761e+06	2.36081e+06	2.18416e+06	3.05376e+06	2.7423e+06	1322678435	1.93718e+07
24	3390	2.55723e+06	2.35302e+06	2.12314e+06	3.14647e+06	2.68429e+06	1310932725	1.93455e+07
25	3690	2.57499e+06	2.26345e+06	2.12609e+06	3.14487e+06	2.84183e+06	1299873725	1.92555e+07
26	3990	2.55602e+06	2.30409e+06	2.09829e+06	3.04253e+06	2.59535e+06	1309413972	1.9309e+07
27	4290	2.52385e+06	2.2885e+06	2.08286e+06	3.14803e+06	2.61523e+06	1311479786	1.92369e+07
28	4590	2.63419e+06	2.33935e+06	2.12056e+06	3.13606e+06	2.64452e+06	1328239147	1.93518e+07
		Background corrected Data
	Time_(sec)	Roi1-bkgd-corr	Roi2-bkgd-corr	Roi3-bkgd-corr	Roi4-bkgd-corr	Roi5-bkgd-corr	Ref_fluo-bkgd-corr
1	0	1.02698e+06	1.264e+06	877353	2.08786e+06	1.54345e+06	4.44784e+08
2	30	1.09551e+06	1.28137e+06	823244	2.08569e+06	1.47038e+06	4.52461e+08
3	60	1.12115e+06	1.23537e+06	856392	2.18657e+06	1.50129e+06	4.57074e+08
4	90	1.08273e+06	1.33032e+06	912484	2.12901e+06	1.51615e+06	4.54468e+08
5	120	1.12935e+06	1.34927e+06	858277	2.15004e+06	1.46023e+06	4.52797e+08
6	150	1.12168e+06	1.27019e+06	892339	2.0549e+06	1.46624e+06	4.50681e+08
7	180	1.10553e+06	1.27118e+06	859793	2.12095e+06	1.55673e+06	4.61132e+08
8	210	382507	488721	409411	897111	563331	4.44608e+08
9	240	507156	689755	478029	1.00277e+06	664381	4.55227e+08
10	270	569226	700226	469678	1.06291e+06	785303	4.46986e+08
11	300	663222	759300	452535	1.11195e+06	820169	454251206
12	330	680683	745961	478048	1.15304e+06	840895	4.62879e+08
13	360	692018	694171	478865	1.35929e+06	825218	4.62081e+08
14	390	650222	700564	477723	1.3396e+06	833061	4.59637e+08
15	690	800101	778178	557381	1.30601e+06	960864	4.78285e+08
16	990	828270	804875	555895	1.5281e+06	953839	4.81588e+08
17	1290	901680	852036	583973	1.5855e+06	1.17277e+06	4.97027e+08
18	1590	996465	917927	635655	1.60759e+06	1.2356e+06	4.91786e+08
19	1890	1.11573e+06	911776	620411	1.84119e+06	1.27393e+06	4.95423e+08
20	2190	1.02149e+06	897824	710253	1.84676e+06	1.37328e+06	5.09549e+08
21	2490	1.05688e+06	914314	645841	1.8967e+06	1.26657e+06	5.00865e+08
22	2790	1.13404e+06	971140	734813	1.72439e+06	1.26677e+06	4.99377e+08
23	3090	1.14022e+06	983423	806771	1.67637e+06	1.36491e+06	5.0706e+08
24	3390	1.18171e+06	977496	747610	1.77095e+06	1.30877e+06	4.96419e+08
25	3690	1.20587e+06	894327	756970	1.77575e+06	1.47271e+06	4.89152e+08
26	3990	1.18309e+06	931161	725357	1.6696e+06	1.22242e+06	4.96437e+08
27	4290	1.15605e+06	920698	715062	1.78023e+06	1.24743e+06	5.01539e+08
28	4590	1.25822e+06	963380	744590	1.76009e+06	1.26855e+06	5.13462e+08
		Bleaching Corrected Data
	Time_(sec)	Roi1-bkgd_bleach-corr	Roi2-bkgd_bleach-corr	Roi3-bkgd_bleach-corr	Roi4-bkgd_bleach-corr	Roi5-bkgd_bleach-corr
1	0	0.00230894	0.00284183	0.00197254	0.00469411	0.00347012
2	30	0.00242121	0.00283201	0.00181948	0.00460965	0.00324973
3	60	0.00245289	0.00270279	0.00187364	0.00478384	0.00328456
4	90	0.00238242	0.00292721	0.00200781	0.00468462	0.00333609
5	120	0.00249416	0.00297987	0.0018955	0.00474836	0.00322492
6	150	0.00248886	0.00281839	0.00197998	0.00455955	0.00325339
7	180	0.00239741	0.00275665	0.00186453	0.00459943	0.00337588
8	210	0.000860325	0.00109922	0.000920836	0.00201776	0.00126703
9	240	0.00111407	0.00151519	0.00105009	0.00220279	0.00145945
10	270	0.00127348	0.00156655	0.00105077	0.00237795	0.00175689
11	300	0.00146003	0.00167154	0.000996223	0.00244787	0.00180554
12	330	0.00147054	0.00161157	0.00103277	0.00249102	0.00181666
13	360	0.00149761	0.00150227	0.00103632	0.00294167	0.00178587
14	390	0.00141464	0.00152417	0.00103935	0.00291447	0.00181243
15	690	0.00167285	0.00162702	0.00116537	0.00273062	0.00200898
16	990	0.00171987	0.00167129	0.0011543	0.00317305	0.00198061
17	1290	0.00181415	0.00171427	0.00117493	0.00318996	0.00235957
18	1590	0.00202622	0.00186652	0.00129254	0.00326889	0.00251248
19	1890	0.00225207	0.0018404	0.00125229	0.0037164	0.00257141
20	2190	0.00200469	0.001762	0.00139389	0.00362431	0.00269508
21	2490	0.00211012	0.00182547	0.00128945	0.00378686	0.00252876
22	2790	0.00227092	0.00194471	0.00147146	0.00345308	0.0025367
23	3090	0.00224868	0.00193946	0.00159108	0.00330606	0.0026918
24	3390	0.00238047	0.0019691	0.00150601	0.00356745	0.00263642
25	3690	0.00246522	0.00182832	0.00154751	0.00363027	0.00301074
26	3990	0.00238315	0.00187569	0.00146113	0.00336317	0.00246239
27	4290	0.00230501	0.00183574	0.00142574	0.00354953	0.0024872
28	4590	0.00245046	0.00187624	0.00145014	0.00342789	0.00247058
		Normalized Data
	Time_(sec)	Roi1_corr_norm	Roi2_corr_norm	Roi3_corr_norm	Roi4_corr_norm	Roi5_corr_norm
1	0	1	1	1	1	1
2	30	1.04863	0.996544	0.922406	0.982008	0.936491
3	60	1.06235	0.951074	0.949864	1.01912	0.946526
4	90	1.03182	1.03004	1.01788	0.99798	0.961375
5	120	1.08022	1.04857	0.960946	1.01156	0.929339
6	150	1.07793	0.991751	1.00377	0.971336	0.937544
7	180	1.03832	0.970026	0.945243	0.979831	0.972842
8	210	0.372607	0.3868	0.466828	0.429849	0.365125
9	240	0.482505	0.533174	0.532355	0.469268	0.420576
10	270	0.551542	0.551248	0.532699	0.506582	0.50629
11	300	0.63234	0.588192	0.505047	0.521478	0.520311
12	330	0.636892	0.567089	0.523576	0.530671	0.523516
13	360	0.648614	0.528628	0.525375	0.626673	0.514643
14	390	0.612681	0.536334	0.52691	0.620878	0.522297
15	690	0.724512	0.572525	0.5908	0.581712	0.578936
16	990	0.744876	0.588105	0.585183	0.675964	0.570761
17	1290	0.785707	0.603227	0.595646	0.679568	0.679968
18	1590	0.877553	0.656802	0.65527	0.696381	0.724032
19	1890	0.975371	0.647612	0.634862	0.791717	0.741014
20	2190	0.86823	0.620023	0.706646	0.772097	0.776653
21	2490	0.91389	0.642358	0.653702	0.806726	0.728725
22	2790	0.983533	0.684315	0.745974	0.73562	0.731012
23	3090	0.973905	0.682469	0.806615	0.704301	0.775709
24	3390	1.03098	0.692898	0.763488	0.759985	0.759749
25	3690	1.06768	0.64336	0.784529	0.773367	0.86762
26	3990	1.03214	0.660029	0.740735	0.716466	0.709597
27	4290	0.998297	0.645973	0.722793	0.756168	0.716749
28	4590	1.06129	0.660225	0.735164	0.730254	0.711958
		Normalize the bouton fluorescent right after bleaching to 0
	Recovery Time_(sec)
1	0	0	0	0	0	0
2	30	0.162605	0.239374	0.129854	0.0698055	0.0940247
3	60	0.264753	0.268931	0.130536	0.135883	0.239365
4	90	0.384301	0.329348	0.0757372	0.162262	0.263138
5	120	0.391036	0.294837	0.112457	0.178541	0.268574
6	150	0.408381	0.231939	0.116022	0.348547	0.253528
7	180	0.355214	0.244542	0.119064	0.338285	0.266507
8	480	0.520679	0.303727	0.245676	0.268928	0.362546
9	780	0.550809	0.329206	0.234544	0.435835	0.348685
10	1080	0.611223	0.353935	0.255279	0.442217	0.53386
11	1380	0.747119	0.441549	0.373436	0.47199	0.608576
12	1680	0.891849	0.42652	0.332992	0.640817	0.637372
13	1980	0.733323	0.381402	0.475248	0.606073	0.697802
14	2280	0.800882	0.417929	0.370328	0.667396	0.616533
15	2580	0.903925	0.486543	0.553184	0.541477	0.620412
16	2880	0.88968	0.483525	0.673357	0.486016	0.696202
17	3180	0.974127	0.50058	0.587892	0.584625	0.66914
18	3480	1.02843	0.419568	0.62959	0.608321	0.852049
19	3780	0.975849	0.446827	0.542802	0.507558	0.584099
20	4080	0.92577	0.42384	0.507246	0.577864	0.596226
21	4380	1.01898	0.447147	0.531762	0.531974	0.588103

## Sheet: T544A-0904-C3
		Raw Data
	Time_(sec)	Roi1	Roi2	Roi3	Roi4	Roi5	Ref_fluo	Background
1	0	1417057	1697044	1294474	1064589	1842423	551118654	34311435
2	30	1.36721e+06	1.67587e+06	1.31156e+06	1.07765e+06	1.80524e+06	5.50855e+08	3.43335e+07
3	60	1.39863e+06	1.71085e+06	1.31886e+06	1.08195e+06	1.80765e+06	5.50054e+08	3.4329e+07
4	90	1.37667e+06	1.69889e+06	1.3204e+06	1.09733e+06	1.81531e+06	5.51937e+08	3.44385e+07
5	120	1.36509e+06	1.71919e+06	1.2967e+06	1.10897e+06	1.80483e+06	5.52714e+08	3.43756e+07
6	150	1.36848e+06	1.72889e+06	1.30489e+06	1.07292e+06	1.79257e+06	5.50605e+08	3.43588e+07
7	180	1.36848e+06	1.72889e+06	1.30489e+06	1.07292e+06	1.79257e+06	5.50605e+08	3.43588e+07
8	210	987657	1.06966e+06	904745	825247	1.06792e+06	5.50618e+08	3.44092e+07
9	240	1.05113e+06	1.10421e+06	946888	858928	1.16723e+06	5.47519e+08	3.42606e+07
10	270	1.07229e+06	1.11791e+06	956086	845779	1.19474e+06	5.49504e+08	3.43811e+07
11	300	1066483	1.1523e+06	964358	845207	1.18772e+06	5.48951e+08	3.44069e+07
12	330	1.0332e+06	1.14395e+06	958075	867165	1.19652e+06	5.47168e+08	3.4317e+07
13	360	1.05038e+06	1.16521e+06	979324	887833	1.2258e+06	5.48673e+08	3.42571e+07
14	390	1.06721e+06	1.15877e+06	965109	862458	1.23339e+06	5.46663e+08	3.42049e+07
15	690	1.10102e+06	1.21676e+06	1.03095e+06	870714	1.21739e+06	5.48831e+08	3.42246e+07
16	990	1.13055e+06	1.21864e+06	1.03651e+06	881444	1.27422e+06	5.4954e+08	3.43857e+07
17	1290	1.15437e+06	1.21516e+06	1.03083e+06	852649	1.30081e+06	5.47334e+08	3.42271e+07
18	1590	1.18564e+06	1.26328e+06	1.1038e+06	873904	1.27818e+06	5.47176e+08	3.42714e+07
19	1890	1.15894e+06	1.26624e+06	1.08839e+06	871380	1.2797e+06	5.48314e+08	3.42534e+07
20	2190	1.22419e+06	1.22085e+06	1.107e+06	852591	1.28786e+06	5.50203e+08	3.42629e+07
21	2490	1.25827e+06	1.22844e+06	1.12734e+06	870410	1.33069e+06	5.48445e+08	3.42283e+07
22	2790	1.26502e+06	1.2378e+06	1.13959e+06	872868	1.2939e+06	5.50274e+08	3.43759e+07
23	3090	1.25991e+06	1.23806e+06	1.17825e+06	855409	1.3115e+06	5.49705e+08	3.44058e+07
24	3390	1.26091e+06	1.2478e+06	1.17544e+06	870792	1.28448e+06	5.47966e+08	3.41394e+07
25	3690	1.3055e+06	1.22818e+06	1.1723e+06	878191	1.33854e+06	5.488e+08	3.43432e+07
26	3990	1.29794e+06	1.21479e+06	1.15521e+06	864815	1.29774e+06	5.45831e+08	3.41737e+07
27	4290	1.31966e+06	1.19068e+06	1.21792e+06	871453	1.37453e+06	5.46383e+08	3.41356e+07
28	4590	1.32009e+06	1.20563e+06	1.22489e+06	887875	1.38112e+06	5.50182e+08	3.43389e+07
		Background corrected Data
	Time_(sec)	Roi1-bkgd-corr	Roi2-bkgd-corr	Roi3-bkgd-corr	Roi4-bkgd-corr	Roi5-bkgd-corr	Ref_fluo-bkgd-corr
1	0	712148	992135	589565	359680	1.13751e+06	1.36482e+08
2	30	661844	970510	606197	372282	1.09987e+06	1.35951e+08
3	60	693362	1.00558e+06	613592	376685	1.10238e+06	1.35206e+08
4	90	669155	991366	612876	389806	1.10779e+06	1.35765e+08
5	120	658862	1.01296e+06	590471	402739	1.0986e+06	1.37303e+08
6	150	662602	1.02301e+06	599012	367042	1.08669e+06	1.35396e+08
7	180	662602	1.02301e+06	599012	367042	1.08669e+06	1.35396e+08
8	210	280739	362742	197827	118330	361002	1.348e+08
9	240	347268	400350	243023	155064	463370	1.33497e+08
10	270	365952	411566	249745	139438	488402	1.34025e+08
11	300	359614	445434	257489	138338	480848	1.33162e+08
12	330	328174	438922	253052	162142	491499	1.32464e+08
13	360	346588	461417	275532	184040	522007	1.34693e+08
14	390	364494	456054	262389	159738	530674	1.33315e+08
15	690	397899	513634	327831	167590	514261	1.35244e+08
16	990	424115	512201	330070	175009	567783	1.34006e+08
17	1290	451193	511980	327654	149472	597635	1.33717e+08
18	1590	481555	559195	399719	169818	574093	1.33023e+08
19	1890	455223	562527	384674	167664	575981	1.34379e+08
20	2190	520278	516934	403088	148679	583948	1.36153e+08
21	2490	555071	525242	424141	167209	627489	1.34813e+08
22	2790	558787	531568	433355	166635	587666	1.34858e+08
23	3090	553062	531208	471400	148563	604651	1.33929e+08
24	3390	559535	546425	474068	169417	583109	1.35408e+08
25	3690	599938	522619	466739	172629	632976	1.3378e+08
26	3990	595857	512708	453135	162736	595656	1.32859e+08
27	4290	618362	489386	516626	170157	673236	1.33871e+08
28	4590	614612	500158	519412	182402	675643	1.35214e+08
		Bleaching Corrected Data
	Time_(sec)	Roi1-bkgd_bleach-corr	Roi2-bkgd_bleach-corr	Roi3-bkgd_bleach-corr	Roi4-bkgd_bleach-corr	Roi5-bkgd_bleach-corr
1	0	0.005	0.007	0.004	0.003	0.008
2	30	0.005	0.007	0.004	0.003	0.008
3	60	0.005	0.007	0.005	0.003	0.008
4	90	0.005	0.007	0.005	0.003	0.008
5	120	0.005	0.007	0.004	0.003	0.008
6	150	0.005	0.008	0.004	0.003	0.008
7	180	0.005	0.008	0.004	0.003	0.008
8	210	0.002	0.003	0.001	0.0008778	0.003
9	240	0.003	0.003	0.002	0.001	0.003
10	270	0.003	0.003	0.002	0.001	0.004
11	300	0.003	0.003	0.002	0.001	0.004
12	330	0.002	0.003	0.002	0.001	0.004
13	360	0.003	0.003	0.002	0.001	0.004
14	390	0.003	0.003	0.002	0.001	0.004
15	690	0.003	0.004	0.002	0.001	0.004
16	990	0.003	0.004	0.002	0.001	0.004
17	1290	0.003	0.004	0.002	0.001	0.004
18	1590	0.004	0.004	0.003	0.001	0.004
19	1890	0.003	0.004	0.003	0.001	0.004
20	2190	0.004	0.004	0.003	0.001	0.004
21	2490	0.004	0.004	0.003	0.001	0.005
22	2790	0.004	0.004	0.003	0.001	0.004
23	3090	0.004	0.004	0.004	0.001	0.005
24	3390	0.004	0.004	0.004	0.001	0.004
25	3690	0.004	0.004	0.003	0.001	0.005
26	3990	0.004	0.004	0.003	0.001	0.004
27	4290	0.005	0.004	0.004	0.001	0.005
28	4590	0.005	0.004	0.004	0.001	0.005
		Normalized Data
	Time_(sec)	Roi1_corr_norm	Roi2_corr_norm	Roi3_corr_norm	Roi4_corr_norm	Roi5_corr_norm
1	0	1	1	1	1	1
2	30	0.994831	1.02123	1.07859	1.02378	0.985542
3	60	1.06271	1.05558	1.10545	1.07377	1.01646
4	90	0.963956	1.03635	1.06415	1.11489	1.00288
5	120	0.979355	1.03988	1.02959	1.09702	0.993976
6	150	0.971259	1.0785	1.06001	1.02493	1.00218
7	180	0.971259	1.0785	1.06001	1.02493	1.00218
8	210	0.435387	0.394742	0.377966	0.304251	0.365531
9	240	0.55249	0.446892	0.48623	0.409309	0.461317
10	270	0.552205	0.436814	0.465319	0.364668	0.501181
11	300	0.556131	0.478549	0.505006	0.365728	0.493769
12	330	0.542407	0.491352	0.503691	0.437403	0.499837
13	360	0.519062	0.495413	0.516903	0.490174	0.512507
14	390	0.568332	0.51304	0.497907	0.481363	0.548063
15	690	0.594366	0.551685	0.595932	0.464231	0.501512
16	990	0.612687	0.555208	0.63072	0.498704	0.541266
17	1290	0.696572	0.566165	0.625453	0.411826	0.570213
18	1590	0.727264	0.62697	0.766565	0.471108	0.553626
19	1890	0.657263	0.630645	0.722215	0.452566	0.573068
20	2190	0.777752	0.617115	0.795281	0.393546	0.559514
21	2490	0.909611	0.625684	0.7845	0.4776	0.61265
22	2790	0.932577	0.653947	0.82357	0.491063	0.559739
23	3090	0.806897	0.626228	0.861142	0.417163	0.582327
24	3390	0.784817	0.648341	0.860289	0.455172	0.572998
25	3690	0.862672	0.608541	0.865413	0.458245	0.599718
26	3990	0.881958	0.593103	0.864077	0.473938	0.575102
27	4290	0.930964	0.573964	0.925783	0.473136	0.651039
28	4590	0.905097	0.592182	0.93948	0.529747	0.656637
		Normalize the bouton fluorescent right after bleaching to 0
	Recovery Time_(sec)
1	0	0	0	0	0	0
2	30	0.210419	0.0802865	0.159478	0.140625	0.150861
3	60	0.209907	0.0647711	0.128675	0.0808708	0.213646
4	90	0.216961	0.129023	0.187136	0.0822896	0.201973
5	120	0.192301	0.148734	0.185199	0.17823	0.21153
6	150	0.150353	0.154986	0.204661	0.248866	0.231485
7	180	0.238885	0.182123	0.176679	0.237072	0.287485
8	480	0.285665	0.241619	0.321075	0.21414	0.214168
9	780	0.318585	0.247042	0.372319	0.260284	0.27678
10	1080	0.469316	0.263911	0.364561	0.143994	0.322371
11	1380	0.524465	0.357522	0.572426	0.223345	0.296246
12	1680	0.398683	0.36318	0.507096	0.198526	0.326867
13	1980	0.615186	0.34235	0.614726	0.119525	0.30552
14	2280	0.85212	0.355542	0.598845	0.232035	0.389208
15	2580	0.893386	0.399054	0.656397	0.250056	0.305874
16	2880	0.667556	0.35638	0.711743	0.151138	0.34145
17	3180	0.627881	0.390423	0.710486	0.202014	0.326757
18	3480	0.767776	0.32915	0.718034	0.206128	0.36884
19	3780	0.802431	0.305383	0.716066	0.227133	0.330071
20	4080	0.890488	0.275918	0.806962	0.22606	0.44967
21	4380	0.844008	0.303965	0.827139	0.301836	0.458487

## Sheet: T544A-0907-C2
		Raw Data
	Time_(sec)	Roi1	Roi2	Roi3	Roi4	Roi5	Ref_fluo	Background
1	0	1134074	1281002	1191805	1090265	1345454	188889687	5608300			Filter out due not enough bouton bleaching and wrong targeting.
2	30	1.13656e+06	1.30555e+06	1.21464e+06	1.11321e+06	1.34145e+06	1.89648e+08	5.65226e+06
3	60	1.1466e+06	1.31326e+06	1.23328e+06	1.13612e+06	1.35559e+06	1.89027e+08	5.60034e+06
4	90	1.17019e+06	1.33521e+06	1.22075e+06	1.12012e+06	1.33785e+06	1.88781e+08	5.5888e+06
5	120	1.14091e+06	1.27914e+06	1.22345e+06	1.12154e+06	1.34634e+06	1.89208e+08	5.65079e+06
6	150	1.15e+06	1.28496e+06	1.22829e+06	1.10924e+06	1.36918e+06	1.89042e+08	5.56786e+06
7	180	1.12416e+06	1.33599e+06	1.21176e+06	1.09763e+06	1.35894e+06	1.89205e+08	5.60492e+06
8	210	968673	1.22027e+06	1.03093e+06	987092	1.11673e+06	1.88561e+08	5.61788e+06
9	240	1.01046e+06	1.30103e+06	1.03068e+06	998055	1.14889e+06	1.88139e+08	5.61429e+06
10	270	994224	1.24541e+06	1.0356e+06	1.02697e+06	1.16278e+06	1.88732e+08	5.58136e+06
11	300	1.0145e+06	1.21934e+06	1.03424e+06	1.00311e+06	1.14901e+06	1.88041e+08	5.62271e+06
12	330	1.00186e+06	1.1891e+06	1.04767e+06	1.00524e+06	1.13909e+06	1.89208e+08	5.62457e+06
13	360	1.02029e+06	1.21958e+06	1.0517e+06	998594	1.12538e+06	1.88966e+08	5.60266e+06
14	390	1.00906e+06	1.25517e+06	1.02357e+06	997154	1.14099e+06	1.88907e+08	5.61132e+06
15	690	963896	1.07136e+06	970048	983896	1.15738e+06	1.84849e+08	5.61562e+06
16	990	1.00345e+06	997791	974502	1.05235e+06	1.19169e+06	1.8748e+08	5.58838e+06
17	1290	1.00345e+06	997791	974502	1.05235e+06	1.19169e+06	1.8748e+08	5.58838e+06
18	1590	985748	938259	1.0825e+06	1.04263e+06	1.20102e+06	1.88827e+08	5.58036e+06
19	1890	985748	938259	1.0825e+06	1.04263e+06	1.20102e+06	1.88827e+08	5.58036e+06
20	2190	991807	928786	1.04132e+06	1.10226e+06	1.24418e+06	1.90381e+08	5.60006e+06
21	2490	986138	978063	1.06413e+06	1.09031e+06	1.27745e+06	1.90294e+08	5.57612e+06
22	2790	998321	994783	1.05263e+06	1.07004e+06	1.25933e+06	1.90386e+08	5.56094e+06
23	3090	1.00776e+06	978734	1.05365e+06	1.06794e+06	1.26191e+06	1.89992e+08	5.62321e+06
24	3390	1.0113e+06	922481	1.0717e+06	1.0824e+06	1.25886e+06	1.8885e+08	5.58668e+06
25	3690	1.00601e+06	921277	1.06334e+06	1.10837e+06	1.225e+06	1.87471e+08	5.59342e+06
26	3990	1.04815e+06	963597	1.06458e+06	1.09893e+06	1.21699e+06	1.8852e+08	5.58502e+06
27	4290	1.06578e+06	933869	1.04261e+06	1.08586e+06	1.23911e+06	1.88793e+08	5.58104e+06
28	4590	1.07166e+06	929210	1.05773e+06	1.09709e+06	1.21283e+06	1.88311e+08	5.6047e+06
		Background corrected Data
	Time_(sec)	Roi1-bkgd-corr	Roi2-bkgd-corr	Roi3-bkgd-corr	Roi4-bkgd-corr	Roi5-bkgd-corr	Ref_fluo-bkgd-corr
1	0	292077	439005	349808	248268	503457	4.9637e+07
2	30	287966	456950	366047	264610	492850	4.93038e+07
3	60	305800	472457	392475	295321	514790	4.99721e+07
4	90	331119	496141	381682	281046	498781	5.00127e+07
5	120	292533	430761	375074	273163	497960	4.89007e+07
6	150	314079	449032	392369	273312	533255	5.07932e+07
7	180	282669	494503	370269	256143	517449	5.00359e+07
8	210	125238	376834	187494	143658	273293	4.907e+07
9	240	167562	458134	187787	155159	305992	4.87376e+07
10	270	156272	407458	197646	189021	324824	5.01484e+07
11	300	170343	375180	190078	158948	304852	4.84302e+07
12	330	157416	344663	203227	160801	294646	4.95513e+07
13	360	179136	378425	210547	157444	284234	4.98534e+07
14	390	166608	412723	181121	154704	298540	4.95789e+07
15	690	120801	228268	126953	140801	314288	4.54142e+07
16	990	164443	158785	135496	213348	352681	4.87216e+07
17	1290	164443	158785	135496	213348	352681	4.87216e+07
18	1590	147946	100456	244700	204825	363213	5.02677e+07
19	1890	147946	100456	244700	204825	363213	5.02677e+07
20	2190	151048	88026.5	200557	261500	403417	5.13328e+07
21	2490	148972	140897	226967	253146	440282	5.18406e+07
22	2790	163434	159896	217741	235151	424442	5.23093e+07
23	3090	163523	134498	209412	223706	417675	5.03692e+07
24	3390	172553	83730.4	232950	243645	420109	5.01341e+07
25	3690	166247	81513.3	223574	268610	385235	4.85874e+07
26	3990	209648	125096	226080	260424	378489	4.98455e+07
27	4290	227879	95964.7	204705	247952	401203	5.02166e+07
28	4590	230207	87754.3	216275	255636	371378	4.91481e+07
		Bleaching Corrected Data
	Time_(sec)	Roi1-bkgd_bleach-corr	Roi2-bkgd_bleach-corr	Roi3-bkgd_bleach-corr	Roi4-bkgd_bleach-corr	Roi5-bkgd_bleach-corr
1	0	0.006	0.009	0.007	0.005	0.01
2	30	0.006	0.009	0.007	0.005	0.01
3	60	0.006	0.009	0.008	0.006	0.01
4	90	0.007	0.01	0.008	0.006	0.01
5	120	0.006	0.009	0.008	0.006	0.01
6	150	0.006	0.009	0.008	0.005	0.01
7	180	0.006	0.01	0.007	0.005	0.01
8	210	0.003	0.008	0.004	0.003	0.006
9	240	0.003	0.009	0.004	0.003	0.006
10	270	0.003	0.008	0.004	0.004	0.006
11	300	0.004	0.008	0.004	0.003	0.006
12	330	0.003	0.007	0.004	0.003	0.006
13	360	0.004	0.008	0.004	0.003	0.006
14	390	0.003	0.008	0.004	0.003	0.006
15	690	0.003	0.005	0.003	0.003	0.007
16	990	0.003	0.003	0.003	0.004	0.007
17	1290	0.003	0.003	0.003	0.004	0.007
18	1590	0.003	0.002	0.005	0.004	0.007
19	1890	0.003	0.002	0.005	0.004	0.007
20	2190	0.003	0.002	0.004	0.005	0.008
21	2490	0.003	0.003	0.004	0.005	0.008
22	2790	0.003	0.003	0.004	0.004	0.008
23	3090	0.003	0.003	0.004	0.004	0.008
24	3390	0.003	0.002	0.005	0.005	0.008
25	3690	0.003	0.002	0.005	0.006	0.008
26	3990	0.004	0.003	0.005	0.005	0.008
27	4290	0.005	0.002	0.004	0.005	0.008
28	4590	0.005	0.002	0.004	0.005	0.008
		Normalized Data
	Time_(sec)	Roi1_corr_norm	Roi2_corr_norm	Roi3_corr_norm	Roi4_corr_norm	Roi5_corr_norm
1	0	1	1	1	1	1
2	30	0.993	1.048	1.053	1.073	0.986
3	60	1.04	1.069	1.114	1.182	1.016
4	90	1.125	1.122	1.083	1.124	0.983
5	120	1.017	0.996	1.088	1.117	1.004
6	150	1.051	1	1.096	1.076	1.035
7	180	0.96	1.117	1.05	1.023	1.02
8	210	0.434	0.868	0.542	0.585	0.549
9	240	0.584	1.063	0.547	0.636	0.619
10	270	0.53	0.919	0.559	0.754	0.639
11	300	0.598	0.876	0.557	0.656	0.621
12	330	0.54	0.786	0.582	0.649	0.586
13	360	0.611	0.858	0.599	0.631	0.562
14	390	0.571	0.941	0.518	0.624	0.594
15	690	0.452	0.568	0.397	0.62	0.682
16	990	0.574	0.368	0.395	0.875	0.714
17	1290	0.574	0.368	0.395	0.875	0.714
18	1590	0.5	0.226	0.691	0.815	0.712
19	1890	0.5	0.226	0.691	0.815	0.712
20	2190	0.5	0.194	0.554	1.018	0.775
21	2490	0.488	0.307	0.621	0.976	0.837
22	2790	0.531	0.346	0.591	0.899	0.8
23	3090	0.552	0.302	0.59	0.888	0.818
24	3390	0.585	0.189	0.659	0.972	0.826
25	3690	0.581	0.19	0.653	1.105	0.782
26	3990	0.715	0.284	0.644	1.045	0.749
27	4290	0.771	0.216	0.578	0.987	0.788
28	4590	0.796	0.202	0.624	1.04	0.745
		Normalize the bouton fluorescent right after bleaching to 0
	Recovery Time_(sec)
1	0	0	0	0	0	0
2	30	0.253134	1.06975	0.00948509	0.102	0.153077
3	60	0.162006	0.279781	0.0322493	0.338	0.196813
4	90	0.27676	0.0438871	0.0284553	0.142	0.157451
5	120	0.178881	-0.449843	0.0758808	0.128	0.0809122
6	150	0.298698	-0.0548589	0.10813	0.092	0.0284286
7	180	0.231196	0.40047	-0.0455285	0.078	0.0984067
8	480	0.0303761	-1.64577	-0.275068	0.07	0.290847
9	780	0.236258	-2.74295	-0.278862	0.58	0.360825
10	1080	0.236258	-2.74295	-0.278862	0.58	0.360825
11	1380	0.111379	-3.52194	0.282656	0.46	0.356451
12	1680	0.111379	-3.52194	0.282656	0.46	0.356451
13	1980	0.111379	-3.69749	0.0227642	0.866	0.494221
14	2280	0.0911283	-3.07759	0.149864	0.782	0.629803
15	2580	0.163693	-2.86364	0.0929539	0.628	0.548891
16	2880	0.199132	-3.10502	0.0910569	0.606	0.588254
17	3180	0.254822	-3.72492	0.221951	0.774	0.605748
18	3480	0.248071	-3.71944	0.210569	1.04	0.509528
19	3780	0.474204	-3.20376	0.193496	0.92	0.437363
20	4080	0.568708	-3.5768	0.0682927	0.804	0.522649
21	4380	0.610897	-3.65361	0.155556	0.91	0.428616

[truncated: 5 more sheets: T544A-0908-C2, T544A-0920-C2, T544A-1011-C2, T544A-1108-C3, T544A-1110-C4]
