# Supplementary material for: A proline-rich motif on VGLUT1 reduces synaptic vesicle super-pool and spontaneous release frequency
Source: eLife journal article supplement (doi:10.7554/elife.50401), 2019-10-30
Supplement: supp [file elife-50401-supp-v1.zip › elife_poa_e50401_Figure_4_source_data_7.xlsx]

## Sheet: Summary-VGLUT1-WT
	Culture1	accumulate intensity		Culture 2	accumulate intensity		Culture 3	accumulate intensity		Culture 4	accumulate intensity		Culture 5	accumulate intensity
Sequence 1	axon-1	446.24		axon-1	708.824		axon-1	703.577		axon-1	402.316		axon-1	353.218
	axon-2	553.449		axon-2	399.116		axon-2	717.522		axon-2	461.492		axon-2	460.182
	axon-3	513.529		axon-3	498.634		axon-3	253.347		axon-3	261.947		axon-3	698.856
	axon-4	424.512		axon-4	510.548		axon-4	526.145		axon-4	270.124		axon-4	388.47
	axon-6	402.879		axon-6	369.518		axon-6	402		axon-6	274.103		axon-6	284.623
	axon-7	427.899		axon-7	359.455		axon-7	424.659		axon-7	633.175		axon-7	404.064
	axon-8	348.414		axon-8	654.776		axon-8	693.943		axon-8	919.061		axon-8	586.772
	axon-9	862.403		axon-9	499.306		axon-9	244.051		axon-9	981.539		axon-9	739.063
Sequence 2	axon-1	447.94		axon-1	456.159		axon-1	505.422		axon-1	666.122		axon-1	510.133
	axon-2	732.623		axon-2	651.344		axon-2	234.084		axon-2	366.902		axon-2	458.684
	axon-3	384.111		axon-3	497.299		axon-3	270.384		axon-3	490.62		axon-3	466.156
	axon-4	281.641		axon-4	418.633		axon-4	884.105		axon-4	558.695		axon-4	368.979
	axon-6	632.741		axon-6	596.598		axon-6	457.217		axon-6	295.931		axon-6	687.502
	axon-7	280.381		axon-7	575.867		axon-7	438.314		axon-7	718.43		axon-7	338.852
	axon-8	568.263		axon-8	657.785		axon-8	472.802		axon-8	399.865		axon-8	351.466
	axon-9	584.993		axon-9	409.727		axon-9	472.216		axon-9	457.501		axon-9	899.172
Sequence 3	axon-1	583.94		axon-1	651.291		axon-1	488.68		axon-1	230.146		axon-1	953.001
	axon-2	724.07		axon-2	360.92		axon-2	526.851		axon-2	329.492		axon-2	461.283
	axon-3	413.798		axon-3	453.118		axon-3	522.921		axon-3	481.294		axon-3	524.131
	axon-4	649.1		axon-4	588.051		axon-4	825.185		axon-4	440.102		axon-4	262.275
	axon-6	949.937		axon-6	822.222		axon-6	452.98		axon-6	517.3		axon-6	285.379
	axon-7	372.808		axon-7	316.511		axon-7	527.366		axon-7	749.642		axon-7	528.2
	axon-8	307.484		axon-8	538.118		axon-8	566.711		axon-8	402.729		axon-8	359.759
	axon-9	360.626		axon-9	521.597		axon-9	354.715		axon-9	427.87		axon-9	465
	Sum	12253.8			12515.4			11965.2			11736.4			11835.2

## Sheet: Summary-VGLUT1-P554A
	Culture 1	accumulate intensity		Culture 2	accumulate intensity		Culture 3	accumulate intensity		Culture 4	accumulate intensity
Sequence 1	axon-1	1353.49		axon-1	714.218		axon-1	309.306		axon-1	301.047
	axon-2	460.442		axon-2	726.585		axon-2	531.528		axon-2	493.889
	axon-3	560.585		axon-3	455.116		axon-3	608.128		axon-3	683.926
	axon-4	815.601		axon-4	769.069		axon-4	1469.06		axon-4	509.963
	axon-6	1166.62		axon-6	557.613		axon-6	708.765		axon-6	857.699
	axon-7	856.1		axon-7	868.102		axon-7	510.9		axon-7	522.834
	axon-8	1094.4		axon-8	319.01		axon-8	428.357		axon-8	631.667
	axon-9	765.969		axon-9	336.034		axon-9	440.306		axon-9	507.195
Sequence 2	axon-1	1462.49		axon-1	368.049		axon-1	907.567		axon-1	537.161
	axon-2	363.889		axon-2	843.649		axon-2	323.655		axon-2	498.819
	axon-3	659.629		axon-3	744.644		axon-3	385.347		axon-3	298.665
	axon-4	583.604		axon-4	1249.71		axon-4	572.453		axon-4	425.67
	axon-6	614.756		axon-6	422.727		axon-6	804.562		axon-6	560.628
	axon-7	691.361		axon-7	453.56		axon-7	530.184		axon-7	525.584
	axon-8	431.89		axon-8	463.857		axon-8	464.276		axon-8	468.261
	axon-9	330.766		axon-9	1489.12		axon-9	852.821		axon-9	467.463
Sequence 3	axon-1	794.702		axon-1	600.626		axon-1	599.391		axon-1	680.576
	axon-2	686.345		axon-2	569.14		axon-2	315.429		axon-2	364.768
	axon-3	577.263		axon-3	348.402		axon-3	526.482		axon-3	639.081
	axon-4	692.139		axon-4	629.329		axon-4	534.589		axon-4	1894.71
	axon-6	448.828		axon-6	987.277		axon-6	577.873		axon-6	446.614
	axon-7	958.997		axon-7	539.456		axon-7	244.373		axon-7	330.325
	axon-8	933.143		axon-8	290.205		axon-8	629.452		axon-8	540.486
	axon-9	456.357		axon-9	356.459		axon-9	404.843		axon-9	610.78
	Sum	17759.4			15102			13679.7			13797.8

## Sheet: Summary-VGLUT1-S540A
	Culture 1	accumulate intensity		Culture 2	accumulate intensity		Culture 3	accumulate intensity		Culture 4	accumulate intensity
Sequence 1	axon-1	506.828		axon-1	539.691		axon-1	400.202		axon-1	320.648
	axon-2	507.427		axon-2	405.195		axon-2	880.701		axon-2	758.819
	axon-3	368.038		axon-3	471.481		axon-3	635.804		axon-3	334.688
	axon-4	547.832		axon-4	391.608		axon-4	301.866		axon-4	317.197
	axon-6	507.523		axon-6	661.041		axon-6	572.885		axon-6	379.609
	axon-7	483.65		axon-7	376.309		axon-7	358.066		axon-7	756.668
	axon-8	693.543		axon-8	644.796		axon-8	272.39		axon-8	611.649
	axon-9	700.142		axon-9	428.176		axon-9	556.773		axon-9	517.871
Sequence 2	axon-1	567.437		axon-1	623.155		axon-1	364.573		axon-1	453.717
	axon-2	356.012		axon-2	416.916		axon-2	359.081		axon-2	544.357
	axon-3	334.99		axon-3	314.478		axon-3	553.967		axon-3	442.586
	axon-4	272.153		axon-4	699.044		axon-4	449.692		axon-4	524.299
	axon-6	814.627		axon-6	780.309		axon-6	709.946		axon-6	380.338
	axon-7	402.131		axon-7	522.303		axon-7	515.264		axon-7	440.854
	axon-8	499.234		axon-8	390.605		axon-8	548.298		axon-8	550.688
	axon-9	759.041		axon-9	514.317		axon-9	408.092		axon-9	614.221
Sequence 3	axon-1	455.508		axon-1	333.477		axon-1	557.854		axon-1	386.895
	axon-2	417.284		axon-2	426.609		axon-2	532.399		axon-2	457.446
	axon-3	386.454		axon-3	278.548		axon-3	357.667		axon-3	814.778
	axon-4	321.301		axon-4	371.831		axon-4	330.064		axon-4	377.761
	axon-6	766.016		axon-6	766.578		axon-6	412.163		axon-6	510.342
	axon-7	599.634		axon-7	740.871		axon-7	793.674		axon-7	654.246
	axon-8	736.33		axon-8	750.103		axon-8	362.247		axon-8	347.033
	axon-9	259.95		axon-9	310.064		axon-9	484.411		axon-9	505.244
	Sum	12263.1			12157.5			11718.1			12002

## Sheet: WT-Culture1_seq01
				Raw Data
Time (S)	Area1	Angle1	IntDen1	RawIntDen1	Length1	Area2	Angle2	IntDen2	RawIntDen2	Length2	Area3	Angle3	IntDen3	RawIntDen3	Length3	Area4	Angle4	IntDen4	RawIntDen4	Length4	Area5	IntDen5	RawIntDen5	Area6	Angle6	IntDen6	RawIntDen6	Length6	Area7	Angle7	IntDen7	RawIntDen7	Length7	Area8	Angle8	IntDen8	RawIntDen8	Length8	Area9	Angle9	IntDen9	RawIntDen9	Length9
0	6	-78.6901	15002.2	15002.2	5.42707	7	38.6598	16040	16040	6.4578	7	-59.0362	18076.5	18076.5	5.82693	7	-59.0362	16457.4	16457.4	5.66666	801	1.03264e+06	1.03264e+06	6	-45	13620.8	13620.8	5.27787	7	99.4623	13304.3	13304.3	6.18705	7	-9.46232	15079.1	15079.1	5.50373	6	-53.1301	12172.1	12172.1	5.42707
0.2	6	-78.6901	13759.9	13759.9	5.42707	7	38.6598	14144.1	14144.1	6.4578	7	-59.0362	14445.8	14445.8	5.82693	7	-59.0362	14984.3	14984.3	5.66666	801	983932	983932	6	-45	12482.3	12482.3	5.27787	7	99.4623	10035.1	10035.1	6.18705	7	-9.46232	22394.3	22394.3	5.50373	6	-53.1301	12767.3	12767.3	5.42707
0.4	6	-78.6901	11931.7	11931.7	5.42707	7	38.6598	17918.5	17918.5	6.4578	7	-59.0362	17502.7	17502.7	5.82693	7	-59.0362	14423	14423	5.66666	801	983096	983096	6	-45	11199.8	11199.8	5.27787	7	99.4623	10618.6	10618.6	6.18705	7	-9.46232	18580.7	18580.7	5.50373	6	-53.1301	12364.8	12364.8	5.42707
0.6	6	-78.6901	11687.4	11687.4	5.42707	7	38.6598	21169.8	21169.8	6.4578	7	-59.0362	15486.7	15486.7	5.82693	7	-59.0362	15097.9	15097.9	5.66666	801	958417	958417	6	-45	12140	12140	5.27787	7	99.4623	13728.6	13728.6	6.18705	7	-9.46232	22598.1	22598.1	5.50373	6	-53.1301	11706.9	11706.9	5.42707
0.8	6	-78.6901	11159.8	11159.8	5.42707	7	38.6598	20421.9	20421.9	6.4578	7	-59.0362	15668.1	15668.1	5.82693	7	-59.0362	15229.5	15229.5	5.66666	801	988757	988757	6	-45	13621.5	13621.5	5.27787	7	99.4623	11159	11159	6.18705	7	-9.46232	21610.8	21610.8	5.50373	6	-53.1301	11244.6	11244.6	5.42707
1	6	-78.6901	17392.2	17392.2	5.42707	7	38.6598	24331.1	24331.1	6.4578	7	-59.0362	16529.9	16529.9	5.82693	7	-59.0362	19231.4	19231.4	5.66666	801	932684	932684	6	-45	10797.6	10797.6	5.27787	7	99.4623	12079.4	12079.4	6.18705	7	-9.46232	21496.1	21496.1	5.50373	6	-53.1301	11892.5	11892.5	5.42707
1.2	6	-78.6901	13735.5	13735.5	5.42707	7	38.6598	16387.8	16387.8	6.4578	7	-59.0362	14706.4	14706.4	5.82693	7	-59.0362	15807.1	15807.1	5.66666	801	974758	974758	6	-45	12226.8	12226.8	5.27787	7	99.4623	11588.3	11588.3	6.18705	7	-9.46232	22459.4	22459.4	5.50373	6	-53.1301	11056.5	11056.5	5.42707
1.4	6	-78.6901	17678.7	17678.7	5.42707	7	38.6598	18395.8	18395.8	6.4578	7	-59.0362	13515.1	13515.1	5.82693	7	-59.0362	18286.5	18286.5	5.66666	801	1008627	1008627	6	-45	16130.4	16130.4	5.27787	7	99.4623	11214.9	11214.9	6.18705	7	-9.46232	16966	16966	5.50373	6	-53.1301	12584.6	12584.6	5.42707
1.6	6	-78.6901	20240.3	20240.3	5.42707	7	38.6598	23320.5	23320.5	6.4578	7	-59.0362	14154.4	14154.4	5.82693	7	-59.0362	14772.1	14772.1	5.66666	801	999344	999344	6	-45	13578	13578	5.27787	7	99.4623	15065.8	15065.8	6.18705	7	-9.46232	16323	16323	5.50373	6	-53.1301	10316.3	10316.3	5.42707
1.8	6	-78.6901	17636.7	17636.7	5.42707	7	38.6598	22660.1	22660.1	6.4578	7	-59.0362	16258.4	16258.4	5.82693	7	-59.0362	18950.6	18950.6	5.66666	801	938725	938725	6	-45	11318	11318	5.27787	7	99.4623	13014.9	13014.9	6.18705	7	-9.46232	15768.6	15768.6	5.50373	6	-53.1301	10031.9	10031.9	5.42707
2	6	-78.6901	17614.3	17614.3	5.42707	7	38.6598	20204.8	20204.8	6.4578	7	-59.0362	14858.4	14858.4	5.82693	7	-59.0362	16239.9	16239.9	5.66666	801	987926	987926	6	-45	14078.3	14078.3	5.27787	7	99.4623	11140.5	11140.5	6.18705	7	-9.46232	17786.5	17786.5	5.50373	6	-53.1301	9567.87	9567.87	5.42707
2.2	6	-78.6901	15033.4	15033.4	5.42707	7	38.6598	16685.4	16685.4	6.4578	7	-59.0362	15388.7	15388.7	5.82693	7	-59.0362	22428.4	22428.4	5.66666	801	947800	947800	6	-45	14201.2	14201.2	5.27787	7	99.4623	13571.6	13571.6	6.18705	7	-9.46232	20457.7	20457.7	5.50373	6	-53.1301	11881	11881	5.42707
2.4	6	-78.6901	16164.1	16164.1	5.42707	7	38.6598	14856.3	14856.3	6.4578	7	-59.0362	12381.9	12381.9	5.82693	7	-59.0362	17799.1	17799.1	5.66666	801	1.01604e+06	1.01604e+06	6	-45	13364	13364	5.27787	7	99.4623	12354.7	12354.7	6.18705	7	-9.46232	15439.2	15439.2	5.50373	6	-53.1301	13691.8	13691.8	5.42707
2.6	6	-78.6901	13348.8	13348.8	5.42707	7	38.6598	16264.5	16264.5	6.4578	7	-59.0362	15156.5	15156.5	5.82693	7	-59.0362	21362.4	21362.4	5.66666	801	954844	954844	6	-45	12378.2	12378.2	5.27787	7	99.4623	10593	10593	6.18705	7	-9.46232	19209.2	19209.2	5.50373	6	-53.1301	11623.2	11623.2	5.42707
2.8	6	-78.6901	14295.4	14295.4	5.42707	7	38.6598	19976.4	19976.4	6.4578	7	-59.0362	15447.4	15447.4	5.82693	7	-59.0362	22076.8	22076.8	5.66666	801	1.00269e+06	1.00269e+06	6	-45	12559.8	12559.8	5.27787	7	99.4623	12590.6	12590.6	6.18705	7	-9.46232	16959.2	16959.2	5.50373	6	-53.1301	9645.09	9645.09	5.42707
3	6	-78.6901	13125.4	13125.4	5.42707	7	38.6598	16649.2	16649.2	6.4578	7	-59.0362	14482.7	14482.7	5.82693	7	-59.0362	16401.2	16401.2	5.66666	801	985159	985159	6	-45	11180.8	11180.8	5.27787	7	99.4623	12137.9	12137.9	6.18705	7	-9.46232	15493.4	15493.4	5.50373	6	-53.1301	11823.8	11823.8	5.42707
3.2	6	-78.6901	13512.8	13512.8	5.42707	7	38.6598	14507.3	14507.3	6.4578	7	-59.0362	19908	19908	5.82693	7	-59.0362	15828.5	15828.5	5.66666	801	963582	963582	6	-45	11997.1	11997.1	5.27787	7	99.4623	13962.4	13962.4	6.18705	7	-9.46232	17172.1	17172.1	5.50373	6	-53.1301	9541.24	9541.24	5.42707
3.4	6	-78.6901	11448.2	11448.2	5.42707	7	38.6598	17281.9	17281.9	6.4578	7	-59.0362	23563.5	23563.5	5.82693	7	-59.0362	23326.9	23326.9	5.66666	801	978926	978926	6	-45	13781.6	13781.6	5.27787	7	99.4623	14794.5	14794.5	6.18705	7	-9.46232	15267	15267	5.50373	6	-53.1301	14110.3	14110.3	5.42707
3.6	6	-78.6901	11597.7	11597.7	5.42707	7	38.6598	18701.5	18701.5	6.4578	7	-59.0362	24737	24737	5.82693	7	-59.0362	20875	20875	5.66666	801	971369	971369	6	-45	11548.9	11548.9	5.27787	7	99.4623	13004.1	13004.1	6.18705	7	-9.46232	17633.3	17633.3	5.50373	6	-53.1301	11004.8	11004.8	5.42707
3.8	6	-78.6901	10418.2	10418.2	5.42707	7	38.6598	18338.7	18338.7	6.4578	7	-59.0362	26854.7	26854.7	5.82693	7	-59.0362	20583.6	20583.6	5.66666	801	979272	979272	6	-45	13016.6	13016.6	5.27787	7	99.4623	9252.39	9252.39	6.18705	7	-9.46232	16960.7	16960.7	5.50373	6	-53.1301	11403	11403	5.42707
4	6	-78.6901	13611.5	13611.5	5.42707	7	38.6598	18034.1	18034.1	6.4578	7	-59.0362	24228.7	24228.7	5.82693	7	-59.0362	21132.6	21132.6	5.66666	801	1.02574e+06	1.02574e+06	6	-45	12808.2	12808.2	5.27787	7	99.4623	14925.2	14925.2	6.18705	7	-9.46232	13589	13589	5.50373	6	-53.1301	11299.6	11299.6	5.42707
4.2	6	-78.6901	11305.3	11305.3	5.42707	7	38.6598	18848.1	18848.1	6.4578	7	-59.0362	17311.8	17311.8	5.82693	7	-59.0362	17887.1	17887.1	5.66666	801	973848	973848	6	-45	13407.8	13407.8	5.27787	7	99.4623	11768.6	11768.6	6.18705	7	-9.46232	13454	13454	5.50373	6	-53.1301	14784.9	14784.9	5.42707
4.4	6	-78.6901	11921.1	11921.1	5.42707	7	38.6598	27834.8	27834.8	6.4578	7	-59.0362	15836.3	15836.3	5.82693	7	-59.0362	20815.5	20815.5	5.66666	801	949528	949528	6	-45	10428.6	10428.6	5.27787	7	99.4623	12013.6	12013.6	6.18705	7	-9.46232	16260.9	16260.9	5.50373	6	-53.1301	19874.1	19874.1	5.42707
4.6	6	-78.6901	16036.9	16036.9	5.42707	7	38.6598	35353.1	35353.1	6.4578	7	-59.0362	16937.1	16937.1	5.82693	7	-59.0362	23601.6	23601.6	5.66666	801	1.0056e+06	1.0056e+06	6	-45	12184.8	12184.8	5.27787	7	99.4623	13356.8	13356.8	6.18705	7	-9.46232	19594.3	19594.3	5.50373	6	-53.1301	23399.2	23399.2	5.42707
4.8	6	-78.6901	14531.8	14531.8	5.42707	7	38.6598	42794.7	42794.7	6.4578	7	-59.0362	16328.3	16328.3	5.82693	7	-59.0362	19467.4	19467.4	5.66666	801	953759	953759	6	-45	12989.4	12989.4	5.27787	7	99.4623	13938.5	13938.5	6.18705	7	-9.46232	16585	16585	5.50373	6	-53.1301	24515.6	24515.6	5.42707
5	6	-78.6901	15986.7	15986.7	5.42707	7	38.6598	29707	29707	6.4578	7	-59.0362	16204.7	16204.7	5.82693	7	-59.0362	20809	20809	5.66666	801	968487	968487	6	-45	14069.8	14069.8	5.27787	7	99.4623	15532.9	15532.9	6.18705	7	-9.46232	16289.2	16289.2	5.50373	6	-53.1301	30123.6	30123.6	5.42707
5.2	6	-78.6901	15832.3	15832.3	5.42707	7	38.6598	35289.7	35289.7	6.4578	7	-59.0362	12276.8	12276.8	5.82693	7	-59.0362	15226.8	15226.8	5.66666	801	983642	983642	6	-45	16273.2	16273.2	5.27787	7	99.4623	14597.7	14597.7	6.18705	7	-9.46232	11928.2	11928.2	5.50373	6	-53.1301	40144.4	40144.4	5.42707
5.4	6	-78.6901	14089.6	14089.6	5.42707	7	38.6598	32415.4	32415.4	6.4578	7	-59.0362	15172.3	15172.3	5.82693	7	-59.0362	18254.9	18254.9	5.66666	801	978173	978173	6	-45	16491.3	16491.3	5.27787	7	99.4623	12913.7	12913.7	6.18705	7	-9.46232	14963.4	14963.4	5.50373	6	-53.1301	38715.8	38715.8	5.42707
5.6	6	-78.6901	18483	18483	5.42707	7	38.6598	33821.8	33821.8	6.4578	7	-59.0362	12400.6	12400.6	5.82693	7	-59.0362	20979.9	20979.9	5.66666	801	1.00324e+06	1.00324e+06	6	-45	12646.7	12646.7	5.27787	7	99.4623	12238.6	12238.6	6.18705	7	-9.46232	12894.3	12894.3	5.50373	6	-53.1301	39036.5	39036.5	5.42707
5.8	6	-78.6901	19115.4	19115.4	5.42707	7	38.6598	37022.5	37022.5	6.4578	7	-59.0362	9786.06	9786.06	5.82693	7	-59.0362	16697.4	16697.4	5.66666	801	969145	969145	6	-45	14513.1	14513.1	5.27787	7	99.4623	10911.7	10911.7	6.18705	7	-9.46232	16502.9	16502.9	5.50373	6	-53.1301	40682.2	40682.2	5.42707
6	6	-78.6901	15329.6	15329.6	5.42707	7	38.6598	39488.5	39488.5	6.4578	7	-59.0362	13068.2	13068.2	5.82693	7	-59.0362	17496.7	17496.7	5.66666	801	973996	973996	6	-45	17818.8	17818.8	5.27787	7	99.4623	12108.6	12108.6	6.18705	7	-9.46232	21172.1	21172.1	5.50373	6	-53.1301	41124.9	41124.9	5.42707
6.2	6	-78.6901	20288.7	20288.7	5.42707	7	38.6598	37542.1	37542.1	6.4578	7	-59.0362	15452.3	15452.3	5.82693	7	-59.0362	17088.2	17088.2	5.66666	801	970305	970305	6	-45	13378.2	13378.2	5.27787	7	99.4623	10455.1	10455.1	6.18705	7	-9.46232	15749.3	15749.3	5.50373	6	-53.1301	38373.9	38373.9	5.42707
6.4	6	-78.6901	15476.7	15476.7	5.42707	7	38.6598	23560.2	23560.2	6.4578	7	-59.0362	18355.4	18355.4	5.82693	7	-59.0362	17353.5	17353.5	5.66666	801	989078	989078	6	-45	16202.2	16202.2	5.27787	7	99.4623	14703.5	14703.5	6.18705	7	-9.46232	19086.1	19086.1	5.50373	6	-53.1301	44419.6	44419.6	5.42707
6.6	6	-78.6901	15893.5	15893.5	5.42707	7	38.6598	19272.1	19272.1	6.4578	7	-59.0362	17488.4	17488.4	5.82693	7	-59.0362	18316.1	18316.1	5.66666	801	964922	964922	6	-45	15815.2	15815.2	5.27787	7	99.4623	13001.7	13001.7	6.18705	7	-9.46232	23742.8	23742.8	5.50373	6	-53.1301	41680.4	41680.4	5.42707
6.8	6	-78.6901	19277.4	19277.4	5.42707	7	38.6598	18935.4	18935.4	6.4578	7	-59.0362	14649.9	14649.9	5.82693	7	-59.0362	21235.3	21235.3	5.66666	801	963332	963332	6	-45	14008.7	14008.7	5.27787	7	99.4623	13652.2	13652.2	6.18705	7	-9.46232	20967.6	20967.6	5.50373	6	-53.1301	47672.7	47672.7	5.42707
7	6	-78.6901	17014.8	17014.8	5.42707	7	38.6598	22128.4	22128.4	6.4578	7	-59.0362	15531.1	15531.1	5.82693	7	-59.0362	12746.5	12746.5	5.66666	801	983647	983647	6	-45	13485.8	13485.8	5.27787	7	99.4623	14909.1	14909.1	6.18705	7	-9.46232	17819.6	17819.6	5.50373	6	-53.1301	45864.3	45864.3	5.42707
7.2	6	-78.6901	17786	17786	5.42707	7	38.6598	19805.3	19805.3	6.4578	7	-59.0362	17862.8	17862.8	5.82693	7	-59.0362	22717.8	22717.8	5.66666	801	1.03562e+06	1.03562e+06	6	-45	15764.8	15764.8	5.27787	7	99.4623	12756.6	12756.6	6.18705	7	-9.46232	17701.8	17701.8	5.50373	6	-53.1301	49217.6	49217.6	5.42707
7.4	6	-78.6901	16193.2	16193.2	5.42707	7	38.6598	24306.4	24306.4	6.4578	7	-59.0362	16560.9	16560.9	5.82693	7	-59.0362	18032.7	18032.7	5.66666	801	976505	976505	6	-45	14342.3	14342.3	5.27787	7	99.4623	15800.8	15800.8	6.18705	7	-9.46232	15847.4	15847.4	5.50373	6	-53.1301	48147.9	48147.9	5.42707
7.6	6	-78.6901	12736.4	12736.4	5.42707	7	38.6598	22937.9	22937.9	6.4578	7	-59.0362	17270.7	17270.7	5.82693	7	-59.0362	16667	16667	5.66666	801	1.00744e+06	1.00744e+06	6	-45	14291.1	14291.1	5.27787	7	99.4623	14437.7	14437.7	6.18705	7	-9.46232	15679.7	15679.7	5.50373	6	-53.1301	40740.3	40740.3	5.42707
7.8	6	-78.6901	17275.7	17275.7	5.42707	7	38.6598	19004.4	19004.4	6.4578	7	-59.0362	17583.2	17583.2	5.82693	7	-59.0362	20923.4	20923.4	5.66666	801	940377	940377	6	-45	14694.2	14694.2	5.27787	7	99.4623	13349.4	13349.4	6.18705	7	-9.46232	17244.1	17244.1	5.50373	6	-53.1301	40135.9	40135.9	5.42707
8	6	-78.6901	16573.2	16573.2	5.42707	7	38.6598	19543.4	19543.4	6.4578	7	-59.0362	18149.6	18149.6	5.82693	7	-59.0362	16734	16734	5.66666	801	982433	982433	6	-45	15846.3	15846.3	5.27787	7	99.4623	14910	14910	6.18705	7	-9.46232	19033.4	19033.4	5.50373	6	-53.1301	41879.6	41879.6	5.42707
8.2	6	-78.6901	18485.2	18485.2	5.42707	7	38.6598	23933.3	23933.3	6.4578	7	-59.0362	17044.7	17044.7	5.82693	7	-59.0362	14883.8	14883.8	5.66666	801	973003	973003	6	-45	16036.8	16036.8	5.27787	7	99.4623	11914.6	11914.6	6.18705	7	-9.46232	15927.3	15927.3	5.50373	6	-53.1301	44554.5	44554.5	5.42707
8.4	6	-78.6901	19406.4	19406.4	5.42707	7	38.6598	19070.7	19070.7	6.4578	7	-59.0362	19549.4	19549.4	5.82693	7	-59.0362	16956	16956	5.66666	801	964613	964613	6	-45	15217.1	15217.1	5.27787	7	99.4623	12064.5	12064.5	6.18705	7	-9.46232	18799.4	18799.4	5.50373	6	-53.1301	42664	42664	5.42707
8.6	6	-78.6901	24462.9	24462.9	5.42707	7	38.6598	19192.1	19192.1	6.4578	7	-59.0362	18671.1	18671.1	5.82693	7	-59.0362	17349.3	17349.3	5.66666	801	1.01221e+06	1.01221e+06	6	-45	13363.7	13363.7	5.27787	7	99.4623	12865	12865	6.18705	7	-9.46232	17479.5	17479.5	5.50373	6	-53.1301	42087	42087	5.42707
8.8	6	-78.6901	20475.1	20475.1	5.42707	7	38.6598	22438.3	22438.3	6.4578	7	-59.0362	21915.3	21915.3	5.82693	7	-59.0362	18016.6	18016.6	5.66666	801	960825	960825	6	-45	18309	18309	5.27787	7	99.4623	12538	12538	6.18705	7	-9.46232	19298.9	19298.9	5.50373	6	-53.1301	36782	36782	5.42707
9	6	-78.6901	19133.2	19133.2	5.42707	7	38.6598	18638.8	18638.8	6.4578	7	-59.0362	20323.1	20323.1	5.82693	7	-59.0362	16603.5	16603.5	5.66666	801	987775	987775	6	-45	15078.9	15078.9	5.27787	7	99.4623	13300.9	13300.9	6.18705	7	-9.46232	18972	18972	5.50373	6	-53.1301	43452.1	43452.1	5.42707
9.2	6	-78.6901	19198.5	19198.5	5.42707	7	38.6598	17190	17190	6.4578	7	-59.0362	18264.7	18264.7	5.82693	7	-59.0362	19630.1	19630.1	5.66666	801	974921	974921	6	-45	14631.7	14631.7	5.27787	7	99.4623	10884.8	10884.8	6.18705	7	-9.46232	22879.1	22879.1	5.50373	6	-53.1301	37218.2	37218.2	5.42707
9.4	6	-78.6901	19013	19013	5.42707	7	38.6598	18704.6	18704.6	6.4578	7	-59.0362	16939.1	16939.1	5.82693	7	-59.0362	18091.4	18091.4	5.66666	801	992609	992609	6	-45	15140.3	15140.3	5.27787	7	99.4623	12760.4	12760.4	6.18705	7	-9.46232	15821.4	15821.4	5.50373	6	-53.1301	40138.7	40138.7	5.42707
9.6	6	-78.6901	21004.9	21004.9	5.42707	7	38.6598	15334.7	15334.7	6.4578	7	-59.0362	14381.1	14381.1	5.82693	7	-59.0362	19378	19378	5.66666	801	1.00615e+06	1.00615e+06	6	-45	16050	16050	5.27787	7	99.4623	14044.2	14044.2	6.18705	7	-9.46232	18544.9	18544.9	5.50373	6	-53.1301	37724.6	37724.6	5.42707
9.8	6	-78.6901	17872.9	17872.9	5.42707	7	38.6598	14964.6	14964.6	6.4578	7	-59.0362	13435.5	13435.5	5.82693	7	-59.0362	15917.2	15917.2	5.66666	801	975430	975430	6	-45	12004.5	12004.5	5.27787	7	99.4623	14778.4	14778.4	6.18705	7	-9.46232	18427.9	18427.9	5.50373	6	-53.1301	42632.5	42632.5	5.42707
10	6	-78.6901	18332.8	18332.8	5.42707	7	38.6598	19989.5	19989.5	6.4578	7	-59.0362	13103.3	13103.3	5.82693	7	-59.0362	16102.8	16102.8	5.66666	801	984424	984424	6	-45	12464.5	12464.5	5.27787	7	99.4623	10313.2	10313.2	6.18705	7	-9.46232	20884.4	20884.4	5.50373	6	-53.1301	44441.2	44441.2	5.42707
10.2	6	-78.6901	14986.3	14986.3	5.42707	7	38.6598	17237.5	17237.5	6.4578	7	-59.0362	14266.3	14266.3	5.82693	7	-59.0362	16516.2	16516.2	5.66666	801	1015656	1015656	6	-45	11365.6	11365.6	5.27787	7	99.4623	10335.7	10335.7	6.18705	7	-9.46232	15593.3	15593.3	5.50373	6	-53.1301	46343.2	46343.2	5.42707
10.4	6	-78.6901	16452.3	16452.3	5.42707	7	38.6598	16918.1	16918.1	6.4578	7	-59.0362	12680	12680	5.82693	7	-59.0362	17073.2	17073.2	5.66666	801	994530	994530	6	-45	16603.6	16603.6	5.27787	7	99.4623	12328.6	12328.6	6.18705	7	-9.46232	16265.5	16265.5	5.50373	6	-53.1301	45857.1	45857.1	5.42707
10.6	6	-78.6901	19248	19248	5.42707	7	38.6598	18741.4	18741.4	6.4578	7	-59.0362	13998.3	13998.3	5.82693	7	-59.0362	18299.1	18299.1	5.66666	801	1.00677e+06	1.00677e+06	6	-45	14324.5	14324.5	5.27787	7	99.4623	12990.6	12990.6	6.18705	7	-9.46232	12583.4	12583.4	5.50373	6	-53.1301	39146.6	39146.6	5.42707
10.8	6	-78.6901	20512.1	20512.1	5.42707	7	38.6598	20048	20048	6.4578	7	-59.0362	13484.9	13484.9	5.82693	7	-59.0362	17796.7	17796.7	5.66666	801	999844	999844	6	-45	14570.1	14570.1	5.27787	7	99.4623	13344.3	13344.3	6.18705	7	-9.46232	17419.6	17419.6	5.50373	6	-53.1301	45838.1	45838.1	5.42707
11	6	-78.6901	19628.3	19628.3	5.42707	7	38.6598	20877.2	20877.2	6.4578	7	-59.0362	14657.2	14657.2	5.82693	7	-59.0362	17925.9	17925.9	5.66666	801	1.00574e+06	1.00574e+06	6	-45	16359.3	16359.3	5.27787	7	99.4623	13121.6	13121.6	6.18705	7	-9.46232	18010.1	18010.1	5.50373	6	-53.1301	41073.2	41073.2	5.42707
11.2	6	-78.6901	21634.8	21634.8	5.42707	7	38.6598	26092.9	26092.9	6.4578	7	-59.0362	12903.6	12903.6	5.82693	7	-59.0362	17144.1	17144.1	5.66666	801	952372	952372	6	-45	16463.4	16463.4	5.27787	7	99.4623	13439.1	13439.1	6.18705	7	-9.46232	11485.4	11485.4	5.50373	6	-53.1301	40291.9	40291.9	5.42707
11.4	6	-78.6901	18382	18382	5.42707	7	38.6598	23080.2	23080.2	6.4578	7	-59.0362	12331.8	12331.8	5.82693	7	-59.0362	17804.5	17804.5	5.66666	801	994116	994116	6	-45	11964.3	11964.3	5.27787	7	99.4623	12321.9	12321.9	6.18705	7	-9.46232	13980.3	13980.3	5.50373	6	-53.1301	35268.6	35268.6	5.42707
11.6	6	-78.6901	20656.1	20656.1	5.42707	7	38.6598	22943.5	22943.5	6.4578	7	-59.0362	14353.3	14353.3	5.82693	7	-59.0362	19635.1	19635.1	5.66666	801	981224	981224	6	-45	12270.4	12270.4	5.27787	7	99.4623	14063.2	14063.2	6.18705	7	-9.46232	12862.9	12862.9	5.50373	6	-53.1301	37669.6	37669.6	5.42707
11.8	6	-78.6901	23082.8	23082.8	5.42707	7	38.6598	25285.7	25285.7	6.4578	7	-59.0362	14983	14983	5.82693	7	-59.0362	19901.7	19901.7	5.66666	801	1.02394e+06	1.02394e+06	6	-45	14585	14585	5.27787	7	99.4623	15358.8	15358.8	6.18705	7	-9.46232	15415.5	15415.5	5.50373	6	-53.1301	40164.5	40164.5	5.42707
12	6	-78.6901	19742.2	19742.2	5.42707	7	38.6598	29439.9	29439.9	6.4578	7	-59.0362	14530	14530	5.82693	7	-59.0362	19969.7	19969.7	5.66666	801	947110	947110	6	-45	15758.6	15758.6	5.27787	7	99.4623	12358.3	12358.3	6.18705	7	-9.46232	11686.3	11686.3	5.50373	6	-53.1301	42351	42351	5.42707
12.2	6	-78.6901	24486.9	24486.9	5.42707	7	38.6598	23561.1	23561.1	6.4578	7	-59.0362	14925	14925	5.82693	7	-59.0362	15813	15813	5.66666	801	940959	940959	6	-45	17484.9	17484.9	5.27787	7	99.4623	17298.5	17298.5	6.18705	7	-9.46232	14318.6	14318.6	5.50373	6	-53.1301	42652.2	42652.2	5.42707
12.4	6	-78.6901	28575.6	28575.6	5.42707	7	38.6598	21959.2	21959.2	6.4578	7	-59.0362	11553.1	11553.1	5.82693	7	-59.0362	16875.9	16875.9	5.66666	801	922956	922956	6	-45	13566.2	13566.2	5.27787	7	99.4623	12311	12311	6.18705	7	-9.46232	11953	11953	5.50373	6	-53.1301	39614.4	39614.4	5.42707
12.6	6	-78.6901	26405.4	26405.4	5.42707	7	38.6598	22890.4	22890.4	6.4578	7	-59.0362	15004.5	15004.5	5.82693	7	-59.0362	15740.8	15740.8	5.66666	801	988698	988698	6	-45	11871.2	11871.2	5.27787	7	99.4623	13303.4	13303.4	6.18705	7	-9.46232	12202.7	12202.7	5.50373	6	-53.1301	43296.9	43296.9	5.42707
12.8	6	-78.6901	22315	22315	5.42707	7	38.6598	17644.5	17644.5	6.4578	7	-59.0362	16901.8	16901.8	5.82693	7	-59.0362	16495.5	16495.5	5.66666	801	1.01077e+06	1.01077e+06	6	-45	11000.8	11000.8	5.27787	7	99.4623	10663	10663	6.18705	7	-9.46232	12813.7	12813.7	5.50373	6	-53.1301	40572.1	40572.1	5.42707
13	6	-78.6901	20466.1	20466.1	5.42707	7	38.6598	15850.6	15850.6	6.4578	7	-59.0362	15928.8	15928.8	5.82693	7	-59.0362	14541.1	14541.1	5.66666	801	1.00091e+06	1.00091e+06	6	-45	13153.8	13153.8	5.27787	7	99.4623	11918.2	11918.2	6.18705	7	-9.46232	13671.7	13671.7	5.50373	6	-53.1301	36568.6	36568.6	5.42707
13.2	6	-78.6901	16412.5	16412.5	5.42707	7	38.6598	18891.2	18891.2	6.4578	7	-59.0362	13599.8	13599.8	5.82693	7	-59.0362	17710.3	17710.3	5.66666	801	1.00003e+06	1.00003e+06	6	-45	13211.4	13211.4	5.27787	7	99.4623	15860.9	15860.9	6.18705	7	-9.46232	12276.7	12276.7	5.50373	6	-53.1301	32480.7	32480.7	5.42707
13.4	6	-78.6901	16539.3	16539.3	5.42707	7	38.6598	13091.4	13091.4	6.4578	7	-59.0362	14010.1	14010.1	5.82693	7	-59.0362	17338.7	17338.7	5.66666	801	968997	968997	6	-45	12153	12153	5.27787	7	99.4623	11925	11925	6.18705	7	-9.46232	10966.2	10966.2	5.50373	6	-53.1301	28630.5	28630.5	5.42707
13.6	6	-78.6901	18184.5	18184.5	5.42707	7	38.6598	13896.5	13896.5	6.4578	7	-59.0362	13989.7	13989.7	5.82693	7	-59.0362	15786.2	15786.2	5.66666	801	1.02917e+06	1.02917e+06	6	-45	9861.94	9861.94	5.27787	7	99.4623	13677.4	13677.4	6.18705	7	-9.46232	13114.1	13114.1	5.50373	6	-53.1301	32030.4	32030.4	5.42707
13.8	6	-78.6901	18029.8	18029.8	5.42707	7	38.6598	15317.5	15317.5	6.4578	7	-59.0362	12601.8	12601.8	5.82693	7	-59.0362	15287.8	15287.8	5.66666	801	944104	944104	6	-45	7703.14	7703.14	5.27787	7	99.4623	11037.6	11037.6	6.18705	7	-9.46232	13872.6	13872.6	5.50373	6	-53.1301	31319.5	31319.5	5.42707
14	6	-78.6901	19794.4	19794.4	5.42707	7	38.6598	15516.2	15516.2	6.4578	7	-59.0362	12133.5	12133.5	5.82693	7	-59.0362	17769.3	17769.3	5.66666	801	983049	983049	6	-45	10905.6	10905.6	5.27787	7	99.4623	17812.3	17812.3	6.18705	7	-9.46232	12067.6	12067.6	5.50373	6	-53.1301	36819.9	36819.9	5.42707
14.2	6	-78.6901	25593.2	25593.2	5.42707	7	38.6598	14188.4	14188.4	6.4578	7	-59.0362	12999.7	12999.7	5.82693	7	-59.0362	14001.3	14001.3	5.66666	801	997064	997064	6	-45	13390.6	13390.6	5.27787	7	99.4623	13779.3	13779.3	6.18705	7	-9.46232	14506.3	14506.3	5.50373	6	-53.1301	25723.6	25723.6	5.42707
14.4	6	-78.6901	25928.9	25928.9	5.42707	7	38.6598	17209.8	17209.8	6.4578	7	-59.0362	16765.5	16765.5	5.82693	7	-59.0362	12025.7	12025.7	5.66666	801	995337	995337	6	-45	9820.04	9820.04	5.27787	7	99.4623	12671.6	12671.6	6.18705	7	-9.46232	15425.4	15425.4	5.50373	6	-53.1301	23440.4	23440.4	5.42707
14.6	6	-78.6901	28440.1	28440.1	5.42707	7	38.6598	12942.9	12942.9	6.4578	7	-59.0362	12320.8	12320.8	5.82693	7	-59.0362	12402.5	12402.5	5.66666	801	1.02297e+06	1.02297e+06	6	-45	11663.9	11663.9	5.27787	7	99.4623	13251	13251	6.18705	7	-9.46232	18088.9	18088.9	5.50373	6	-53.1301	27552	27552	5.42707
14.8	6	-78.6901	27601	27601	5.42707	7	38.6598	16226.8	16226.8	6.4578	7	-59.0362	15913.7	15913.7	5.82693	7	-59.0362	13753.2	13753.2	5.66666	801	973507	973507	6	-45	12089	12089	5.27787	7	99.4623	13601	13601	6.18705	7	-9.46232	15062.9	15062.9	5.50373	6	-53.1301	17057.5	17057.5	5.42707
15	6	-78.6901	28826.4	28826.4	5.42707	7	38.6598	13067.6	13067.6	6.4578	7	-59.0362	16934.6	16934.6	5.82693	7	-59.0362	13925.6	13925.6	5.66666	801	1.00583e+06	1.00583e+06	6	-45	14432.7	14432.7	5.27787	7	99.4623	13266.4	13266.4	6.18705	7	-9.46232	17044.9	17044.9	5.50373	6	-53.1301	19427	19427	5.42707
15.2	6	-78.6901	26923.1	26923.1	5.42707	7	38.6598	10927.1	10927.1	6.4578	7	-59.0362	18812.5	18812.5	5.82693	7	-59.0362	14043.9	14043.9	5.66666	801	1.03195e+06	1.03195e+06	6	-45	11265.5	11265.5	5.27787	7	99.4623	15554.3	15554.3	6.18705	7	-9.46232	17558.8	17558.8	5.50373	6	-53.1301	15563.3	15563.3	5.42707
15.4	6	-78.6901	29101.2	29101.2	5.42707	7	38.6598	15153.7	15153.7	6.4578	7	-59.0362	15003.9	15003.9	5.82693	7	-59.0362	17918.6	17918.6	5.66666	801	981083	981083	6	-45	15017.7	15017.7	5.27787	7	99.4623	13326	13326	6.18705	7	-9.46232	17837.2	17837.2	5.50373	6	-53.1301	13554.3	13554.3	5.42707
15.6	6	-78.6901	24793.8	24793.8	5.42707	7	38.6598	14266.8	14266.8	6.4578	7	-59.0362	17110.7	17110.7	5.82693	7	-59.0362	16208.9	16208.9	5.66666	801	966847	966847	6	-45	10490.1	10490.1	5.27787	7	99.4623	12057.7	12057.7	6.18705	7	-9.46232	14860.1	14860.1	5.50373	6	-53.1301	13346.2	13346.2	5.42707
15.8	6	-78.6901	24593.2	24593.2	5.42707	7	38.6598	13041.4	13041.4	6.4578	7	-59.0362	18937.9	18937.9	5.82693	7	-59.0362	15846	15846	5.66666	801	983106	983106	6	-45	11536.3	11536.3	5.27787	7	99.4623	15407.1	15407.1	6.18705	7	-9.46232	16168.6	16168.6	5.50373	6	-53.1301	10830.2	10830.2	5.42707
16	6	-78.6901	27984	27984	5.42707	7	38.6598	14443.6	14443.6	6.4578	7	-59.0362	17418.5	17418.5	5.82693	7	-59.0362	16053.3	16053.3	5.66666	801	1.0101e+06	1.0101e+06	6	-45	12502.7	12502.7	5.27787	7	99.4623	11862.5	11862.5	6.18705	7	-9.46232	17793.9	17793.9	5.50373	6	-53.1301	13054.2	13054.2	5.42707
16.2	6	-78.6901	26825.7	26825.7	5.42707	7	38.6598	14351.8	14351.8	6.4578	7	-59.0362	15326.2	15326.2	5.82693	7	-59.0362	12160	12160	5.66666	801	1.01104e+06	1.01104e+06	6	-45	9147.07	9147.07	5.27787	7	99.4623	12063.1	12063.1	6.18705	7	-9.46232	12517.2	12517.2	5.50373	6	-53.1301	17101.8	17101.8	5.42707
16.4	6	-78.6901	29655	29655	5.42707	7	38.6598	18046	18046	6.4578	7	-59.0362	14393.7	14393.7	5.82693	7	-59.0362	14173.7	14173.7	5.66666	801	962333	962333	6	-45	10311.6	10311.6	5.27787	7	99.4623	11561	11561	6.18705	7	-9.46232	14548.2	14548.2	5.50373	6	-53.1301	14308.9	14308.9	5.42707
16.6	6	-78.6901	26396.1	26396.1	5.42707	7	38.6598	18169.8	18169.8	6.4578	7	-59.0362	18251.5	18251.5	5.82693	7	-59.0362	14078.2	14078.2	5.66666	801	1.0128e+06	1.0128e+06	6	-45	10014.9	10014.9	5.27787	7	99.4623	12071.2	12071.2	6.18705	7	-9.46232	14139.4	14139.4	5.50373	6	-53.1301	15080.1	15080.1	5.42707
16.8	6	-78.6901	26736.3	26736.3	5.42707	7	38.6598	16595	16595	6.4578	7	-59.0362	16750.5	16750.5	5.82693	7	-59.0362	15403.6	15403.6	5.66666	801	948842	948842	6	-45	10725.5	10725.5	5.27787	7	99.4623	12719.9	12719.9	6.18705	7	-9.46232	18267.5	18267.5	5.50373	6	-53.1301	17771.8	17771.8	5.42707
17	6	-78.6901	23476.1	23476.1	5.42707	7	38.6598	16442.5	16442.5	6.4578	7	-59.0362	14393.4	14393.4	5.82693	7	-59.0362	10113.2	10113.2	5.66666	801	1.02465e+06	1.02465e+06	6	-45	11508.7	11508.7	5.27787	7	99.4623	10897	10897	6.18705	7	-9.46232	16723	16723	5.50373	6	-53.1301	18736.9	18736.9	5.42707
17.2	6	-78.6901	22264.5	22264.5	5.42707	7	38.6598	15649.6	15649.6	6.4578	7	-59.0362	16235.2	16235.2	5.82693	7	-59.0362	13019.6	13019.6	5.66666	801	983453	983453	6	-45	16688.1	16688.1	5.27787	7	99.4623	12827.6	12827.6	6.18705	7	-9.46232	16189.9	16189.9	5.50373	6	-53.1301	17224.7	17224.7	5.42707
17.4	6	-78.6901	28668.6	28668.6	5.42707	7	38.6598	15741.4	15741.4	6.4578	7	-59.0362	14829	14829	5.82693	7	-59.0362	15734.4	15734.4	5.66666	801	1.03645e+06	1.03645e+06	6	-45	13235.8	13235.8	5.27787	7	99.4623	12600.5	12600.5	6.18705	7	-9.46232	12814.9	12814.9	5.50373	6	-53.1301	16069.2	16069.2	5.42707
17.6	6	-78.6901	25773.4	25773.4	5.42707	7	38.6598	20014.4	20014.4	6.4578	7	-59.0362	16409.8	16409.8	5.82693	7	-59.0362	17364.5	17364.5	5.66666	801	1.05319e+06	1.05319e+06	6	-45	15643.1	15643.1	5.27787	7	99.4623	12566.9	12566.9	6.18705	7	-9.46232	14672.7	14672.7	5.50373	6	-53.1301	15316.4	15316.4	5.42707
17.8	6	-78.6901	26993.4	26993.4	5.42707	7	38.6598	20352.4	20352.4	6.4578	7	-59.0362	16284.4	16284.4	5.82693	7	-59.0362	13964.9	13964.9	5.66666	801	985133	985133	6	-45	17635.9	17635.9	5.27787	7	99.4623	12758.5	12758.5	6.18705	7	-9.46232	19076.9	19076.9	5.50373	6	-53.1301	15808.7	15808.7	5.42707
18	6	-78.6901	23052.2	23052.2	5.42707	7	38.6598	19338	19338	6.4578	7	-59.0362	18898.2	18898.2	5.82693	7	-59.0362	15566	15566	5.66666	801	981571	981571	6	-45	11101.2	11101.2	5.27787	7	99.4623	15329.6	15329.6	6.18705	7	-9.46232	17747.4	17747.4	5.50373	6	-53.1301	18008.8	18008.8	5.42707
18.2	6	-78.6901	23841	23841	5.42707	7	38.6598	23668.6	23668.6	6.4578	7	-59.0362	18633.2	18633.2	5.82693	7	-59.0362	15542.6	15542.6	5.66666	801	1.00108e+06	1.00108e+06	6	-45	11388.8	11388.8	5.27787	7	99.4623	11391.3	11391.3	6.18705	7	-9.46232	18869.8	18869.8	5.50373	6	-53.1301	12509.5	12509.5	5.42707
18.4	6	-78.6901	28766.9	28766.9	5.42707	7	38.6598	16489.7	16489.7	6.4578	7	-59.0362	17034.5	17034.5	5.82693	7	-59.0362	20418.9	20418.9	5.66666	801	987001	987001	6	-45	12606.8	12606.8	5.27787	7	99.4623	12762.3	12762.3	6.18705	7	-9.46232	12684.6	12684.6	5.50373	6	-53.1301	14554	14554	5.42707
18.6	6	-78.6901	26943.2	26943.2	5.42707	7	38.6598	18622.9	18622.9	6.4578	7	-59.0362	14474	14474	5.82693	7	-59.0362	16343.7	16343.7	5.66666	801	1.02043e+06	1.02043e+06	6	-45	13974.9	13974.9	5.27787	7	99.4623	10772.4	10772.4	6.18705	7	-9.46232	14312.6	14312.6	5.50373	6	-53.1301	15985.6	15985.6	5.42707
18.8	6	-78.6901	32762.3	32762.3	5.42707	7	38.6598	31463.5	31463.5	6.4578	7	-59.0362	12618.5	12618.5	5.82693	7	-59.0362	14941.9	14941.9	5.66666	801	969927	969927	6	-45	15368.3	15368.3	5.27787	7	99.4623	13880.2	13880.2	6.18705	7	-9.46232	14470.4	14470.4	5.50373	6	-53.1301	18975.9	18975.9	5.42707
19	6	-78.6901	27194.3	27194.3	5.42707	7	38.6598	30937.4	30937.4	6.4578	7	-59.0362	16624.5	16624.5	5.82693	7	-59.0362	15947.9	15947.9	5.66666	801	1.00648e+06	1.00648e+06	6	-45	14484.2	14484.2	5.27787	7	99.4623	11361	11361	6.18705	7	-9.46232	13383.8	13383.8	5.50373	6	-53.1301	15977.6	15977.6	5.42707
19.2	6	-78.6901	26479.5	26479.5	5.42707	7	38.6598	31804.4	31804.4	6.4578	7	-59.0362	16587.6	16587.6	5.82693	7	-59.0362	15991	15991	5.66666	801	1.00806e+06	1.00806e+06	6	-45	15182.1	15182.1	5.27787	7	99.4623	10223.7	10223.7	6.18705	7	-9.46232	19624.6	19624.6	5.50373	6	-53.1301	18715.3	18715.3	5.42707
19.4	6	-78.6901	27833	27833	5.42707	7	38.6598	19177.5	19177.5	6.4578	7	-59.0362	17840.2	17840.2	5.82693	7	-59.0362	16426.5	16426.5	5.66666	801	999336	999336	6	-45	14093	14093	5.27787	7	99.4623	11790.4	11790.4	6.18705	7	-9.46232	18321.1	18321.1	5.50373	6	-53.1301	13266	13266	5.42707
19.6	6	-78.6901	26071.9	26071.9	5.42707	7	38.6598	24168.7	24168.7	6.4578	7	-59.0362	16031.1	16031.1	5.82693	7	-59.0362	15918.7	15918.7	5.66666	801	979028	979028	6	-45	17236.2	17236.2	5.27787	7	99.4623	11316.5	11316.5	6.18705	7	-9.46232	17438.8	17438.8	5.50373	6	-53.1301	14288.9	14288.9	5.42707
19.8	6	-78.6901	23555	23555	5.42707	7	38.6598	22884.1	22884.1	6.4578	7	-59.0362	17672.4	17672.4	5.82693	7	-59.0362	18847.2	18847.2	5.66666	801	1.02327e+06	1.02327e+06	6	-45	17350.7	17350.7	5.27787	7	99.4623	12186.7	12186.7	6.18705	7	-9.46232	18356.9	18356.9	5.50373	6	-53.1301	16577.6	16577.6	5.42707
20	6	-78.6901	24301.7	24301.7	5.42707	7	38.6598	18634.6	18634.6	6.4578	7	-59.0362	15351.3	15351.3	5.82693	7	-59.0362	15921	15921	5.66666	801	1018792	1018792	6	-45	15818	15818	5.27787	7	99.4623	13576	13576	6.18705	7	-9.46232	15216.3	15216.3	5.50373	6	-53.1301	17749.7	17749.7	5.42707
20.2	6	-78.6901	22154.3	22154.3	5.42707	7	38.6598	18425	18425	6.4578	7	-59.0362	11532.6	11532.6	5.82693	7	-59.0362	15806.5	15806.5	5.66666	801	1.00628e+06	1.00628e+06	6	-45	12125.4	12125.4	5.27787	7	99.4623	10348.5	10348.5	6.18705	7	-9.46232	16129.9	16129.9	5.50373	6	-53.1301	19404.3	19404.3	5.42707
20.4	6	-78.6901	26340.2	26340.2	5.42707	7	38.6598	13892.6	13892.6	6.4578	7	-59.0362	16924.1	16924.1	5.82693	7	-59.0362	14401.2	14401.2	5.66666	801	994182	994182	6	-45	15996.2	15996.2	5.27787	7	99.4623	12974.4	12974.4	6.18705	7	-9.46232	11720.2	11720.2	5.50373	6	-53.1301	16853.4	16853.4	5.42707
20.6	6	-78.6901	25877.1	25877.1	5.42707	7	38.6598	18843.2	18843.2	6.4578	7	-59.0362	17414.6	17414.6	5.82693	7	-59.0362	15316.9	15316.9	5.66666	801	1.05786e+06	1.05786e+06	6	-45	15469.7	15469.7	5.27787	7	99.4623	16913.8	16913.8	6.18705	7	-9.46232	11975.6	11975.6	5.50373	6	-53.1301	21054.7	21054.7	5.42707
20.8	6	-78.6901	22740.6	22740.6	5.42707	7	38.6598	13339.7	13339.7	6.4578	7	-59.0362	17211.3	17211.3	5.82693	7	-59.0362	14727.3	14727.3	5.66666	801	1.03019e+06	1.03019e+06	6	-45	14372.8	14372.8	5.27787	7	99.4623	14622.9	14622.9	6.18705	7	-9.46232	14826.4	14826.4	5.50373	6	-53.1301	19339.8	19339.8	5.42707
21	6	-78.6901	26164.2	26164.2	5.42707	7	38.6598	10461.7	10461.7	6.4578	7	-59.0362	17810.5	17810.5	5.82693	7	-59.0362	12998.5	12998.5	5.66666	801	997792	997792	6	-45	13978.5	13978.5	5.27787	7	99.4623	12680.7	12680.7	6.18705	7	-9.46232	11768.9	11768.9	5.50373	6	-53.1301	20021.4	20021.4	5.42707
21.2	6	-78.6901	30134.6	30134.6	5.42707	7	38.6598	15085.5	15085.5	6.4578	7	-59.0362	15634.3	15634.3	5.82693	7	-59.0362	13504.4	13504.4	5.66666	801	1.00878e+06	1.00878e+06	6	-45	17967	17967	5.27787	7	99.4623	11705.1	11705.1	6.18705	7	-9.46232	17993	17993	5.50373	6	-53.1301	18448.1	18448.1	5.42707
21.4	6	-78.6901	30077.5	30077.5	5.42707	7	38.6598	21242.8	21242.8	6.4578	7	-59.0362	16122.9	16122.9	5.82693	7	-59.0362	13879.3	13879.3	5.66666	801	1.00212e+06	1.00212e+06	6	-45	17292.7	17292.7	5.27787	7	99.4623	11452.3	11452.3	6.18705	7	-9.46232	14973	14973	5.50373	6	-53.1301	22728.5	22728.5	5.42707
21.6	6	-78.6901	34580.9	34580.9	5.42707	7	38.6598	22050	22050	6.4578	7	-59.0362	16219.5	16219.5	5.82693	7	-59.0362	13061.3	13061.3	5.66666	801	1.00802e+06	1.00802e+06	6	-45	14855.9	14855.9	5.27787	7	99.4623	10772.5	10772.5	6.18705	7	-9.46232	17535.6	17535.6	5.50373	6	-53.1301	23588.9	23588.9	5.42707
21.8	6	-78.6901	35295.1	35295.1	5.42707	7	38.6598	27193.4	27193.4	6.4578	7	-59.0362	11842	11842	5.82693	7	-59.0362	11465.4	11465.4	5.66666	801	993079	993079	6	-45	12862.6	12862.6	5.27787	7	99.4623	13189.2	13189.2	6.18705	7	-9.46232	13252.9	13252.9	5.50373	6	-53.1301	23329.8	23329.8	5.42707
22	6	-78.6901	27794.5	27794.5	5.42707	7	38.6598	17959.8	17959.8	6.4578	7	-59.0362	14538.6	14538.6	5.82693	7	-59.0362	11621.9	11621.9	5.66666	801	988215	988215	6	-45	14606.5	14606.5	5.27787	7	99.4623	12404.7	12404.7	6.18705	7	-9.46232	14115.2	14115.2	5.50373	6	-53.1301	23023.1	23023.1	5.42707
22.2	6	-78.6901	21887.4	21887.4	5.42707	7	38.6598	18641.1	18641.1	6.4578	7	-59.0362	14622.2	14622.2	5.82693	7	-59.0362	14045.5	14045.5	5.66666	801	971422	971422	6	-45	18891.4	18891.4	5.27787	7	99.4623	10125.4	10125.4	6.18705	7	-9.46232	13095	13095	5.50373	6	-53.1301	20190.4	20190.4	5.42707
22.4	6	-78.6901	16231.4	16231.4	5.42707	7	38.6598	16250.2	16250.2	6.4578	7	-59.0362	12624	12624	5.82693	7	-59.0362	13179.5	13179.5	5.66666	801	1.02243e+06	1.02243e+06	6	-45	15898.8	15898.8	5.27787	7	99.4623	13634.7	13634.7	6.18705	7	-9.46232	12306.7	12306.7	5.50373	6	-53.1301	20429.5	20429.5	5.42707
22.6	6	-78.6901	21924	21924	5.42707	7	38.6598	18527.9	18527.9	6.4578	7	-59.0362	13728.2	13728.2	5.82693	7	-59.0362	16547.3	16547.3	5.66666	801	978712	978712	6	-45	14709.5	14709.5	5.27787	7	99.4623	12394.5	12394.5	6.18705	7	-9.46232	16660.4	16660.4	5.50373	6	-53.1301	17612.8	17612.8	5.42707
22.8	6	-78.6901	18658.1	18658.1	5.42707	7	38.6598	15105.7	15105.7	6.4578	7	-59.0362	10710.3	10710.3	5.82693	7	-59.0362	17401.4	17401.4	5.66666	801	999371	999371	6	-45	18945.2	18945.2	5.27787	7	99.4623	13030.7	13030.7	6.18705	7	-9.46232	12672.4	12672.4	5.50373	6	-53.1301	24811.5	24811.5	5.42707
23	6	-78.6901	17799.7	17799.7	5.42707	7	38.6598	17229.5	17229.5	6.4578	7	-59.0362	11917.9	11917.9	5.82693	7	-59.0362	16233	16233	5.66666	801	983846	983846	6	-45	14031.7	14031.7	5.27787	7	99.4623	11969.3	11969.3	6.18705	7	-9.46232	14873.8	14873.8	5.50373	6	-53.1301	22408.5	22408.5	5.42707
23.2	6	-78.6901	14606.3	14606.3	5.42707	7	38.6598	19957.4	19957.4	6.4578	7	-59.0362	14478.2	14478.2	5.82693	7	-59.0362	13693.4	13693.4	5.66666	801	1.00829e+06	1.00829e+06	6	-45	14363.6	14363.6	5.27787	7	99.4623	14595.5	14595.5	6.18705	7	-9.46232	19299.5	19299.5	5.50373	6	-53.1301	22128.5	22128.5	5.42707
23.4	6	-78.6901	16690.5	16690.5	5.42707	7	38.6598	23405.9	23405.9	6.4578	7	-59.0362	14751.4	14751.4	5.82693	7	-59.0362	14050.5	14050.5	5.66666	801	970391	970391	6	-45	18330	18330	5.27787	7	99.4623	12669.9	12669.9	6.18705	7	-9.46232	12459.5	12459.5	5.50373	6	-53.1301	22900.7	22900.7	5.42707
23.6	6	-78.6901	17023.6	17023.6	5.42707	7	38.6598	17089	17089	6.4578	7	-59.0362	15192.6	15192.6	5.82693	7	-59.0362	12254.9	12254.9	5.66666	801	951820	951820	6	-45	13127.3	13127.3	5.27787	7	99.4623	15852.3	15852.3	6.18705	7	-9.46232	13953.1	13953.1	5.50373	6	-53.1301	30623.9	30623.9	5.42707
23.8	6	-78.6901	15522.1	15522.1	5.42707	7	38.6598	21352	21352	6.4578	7	-59.0362	14958.9	14958.9	5.82693	7	-59.0362	11981.5	11981.5	5.66666	801	978364	978364	6	-45	13328.4	13328.4	5.27787	7	99.4623	11815.4	11815.4	6.18705	7	-9.46232	17075.1	17075.1	5.50373	6	-53.1301	25461.2	25461.2	5.42707
24	6	-78.6901	18794.5	18794.5	5.42707	7	38.6598	20331.1	20331.1	6.4578	7	-59.0362	12891.1	12891.1	5.82693	7	-59.0362	14958.7	14958.7	5.66666	801	1.00543e+06	1.00543e+06	6	-45	16045.2	16045.2	5.27787	7	99.4623	12843	12843	6.18705	7	-9.46232	17160.1	17160.1	5.50373	6	-53.1301	25155.6	25155.6	5.42707
24.2	6	-78.6901	19907.4	19907.4	5.42707	7	38.6598	18775.6	18775.6	6.4578	7	-59.0362	13507.5	13507.5	5.82693	7	-59.0362	13284.9	13284.9	5.66666	801	986693	986693	6	-45	14315.3	14315.3	5.27787	7	99.4623	10580.6	10580.6	6.18705	7	-9.46232	15653.7	15653.7	5.50373	6	-53.1301	26461.4	26461.4	5.42707
24.4	6	-78.6901	18040.2	18040.2	5.42707	7	38.6598	19879.8	19879.8	6.4578	7	-59.0362	10626.3	10626.3	5.82693	7	-59.0362	13717.1	13717.1	5.66666	801	981312	981312	6	-45	13510.7	13510.7	5.27787	7	99.4623	12734	12734	6.18705	7	-9.46232	13018.5	13018.5	5.50373	6	-53.1301	22759.3	22759.3	5.42707
24.6	6	-78.6901	19742.9	19742.9	5.42707	7	38.6598	20466.5	20466.5	6.4578	7	-59.0362	11754.8	11754.8	5.82693	7	-59.0362	13589.2	13589.2	5.66666	801	1.01164e+06	1.01164e+06	6	-45	13385.4	13385.4	5.27787	7	99.4623	14291.9	14291.9	6.18705	7	-9.46232	12350.6	12350.6	5.50373	6	-53.1301	21641.1	21641.1	5.42707
24.8	6	-78.6901	17886.3	17886.3	5.42707	7	38.6598	19665.8	19665.8	6.4578	7	-59.0362	9447.17	9447.17	5.82693	7	-59.0362	12579.5	12579.5	5.66666	801	1.00225e+06	1.00225e+06	6	-45	14189.7	14189.7	5.27787	7	99.4623	12550.5	12550.5	6.18705	7	-9.46232	14398.6	14398.6	5.50373	6	-53.1301	24775.8	24775.8	5.42707
25	6	-78.6901	15226.7	15226.7	5.42707	7	38.6598	16181.9	16181.9	6.4578	7	-59.0362	11709.2	11709.2	5.82693	7	-59.0362	14164.8	14164.8	5.66666	801	1.0263e+06	1.0263e+06	6	-45	16253	16253	5.27787	7	99.4623	10799	10799	6.18705	7	-9.46232	12748.8	12748.8	5.50373	6	-53.1301	24111.4	24111.4	5.42707
25.2	6	-78.6901	15377.4	15377.4	5.42707	7	38.6598	16694.2	16694.2	6.4578	7	-59.0362	12291.9	12291.9	5.82693	7	-59.0362	14298.1	14298.1	5.66666	801	954603	954603	6	-45	14653.4	14653.4	5.27787	7	99.4623	12323.8	12323.8	6.18705	7	-9.46232	15183.8	15183.8	5.50373	6	-53.1301	24710.3	24710.3	5.42707
25.4	6	-78.6901	17204.8	17204.8	5.42707	7	38.6598	10738.1	10738.1	6.4578	7	-59.0362	13580.1	13580.1	5.82693	7	-59.0362	14200.9	14200.9	5.66666	801	1.00997e+06	1.00997e+06	6	-45	17428.5	17428.5	5.27787	7	99.4623	11341.7	11341.7	6.18705	7	-9.46232	15981.9	15981.9	5.50373	6	-53.1301	19202.5	19202.5	5.42707
25.6	6	-78.6901	17582.8	17582.8	5.42707	7	38.6598	16816.8	16816.8	6.4578	7	-59.0362	13534.9	13534.9	5.82693	7	-59.0362	12345.1	12345.1	5.66666	801	1.08234e+06	1.08234e+06	6	-45	20969.1	20969.1	5.27787	7	99.4623	15917.3	15917.3	6.18705	7	-9.46232	13459.2	13459.2	5.50373	6	-53.1301	20031.5	20031.5	5.42707
25.8	6	-78.6901	12229.8	12229.8	5.42707	7	38.6598	16594	16594	6.4578	7	-59.0362	11640.1	11640.1	5.82693	7	-59.0362	12085.5	12085.5	5.66666	801	959130	959130	6	-45	22314.2	22314.2	5.27787	7	99.4623	12875.3	12875.3	6.18705	7	-9.46232	13094.6	13094.6	5.50373	6	-53.1301	23022.8	23022.8	5.42707
26	6	-78.6901	20069.3	20069.3	5.42707	7	38.6598	15594.3	15594.3	6.4578	7	-59.0362	12064.4	12064.4	5.82693	7	-59.0362	12177.7	12177.7	5.66666	801	1.00362e+06	1.00362e+06	6	-45	19533.2	19533.2	5.27787	7	99.4623	12919.4	12919.4	6.18705	7	-9.46232	12592.9	12592.9	5.50373	6	-53.1301	25393.1	25393.1	5.42707
26.2	6	-78.6901	18403.4	18403.4	5.42707	7	38.6598	11471.3	11471.3	6.4578	7	-59.0362	11521.9	11521.9	5.82693	7	-59.0362	13618.8	13618.8	5.66666	801	986399	986399	6	-45	21992.4	21992.4	5.27787	7	99.4623	12311.1	12311.1	6.18705	7	-9.46232	17066.4	17066.4	5.50373	6	-53.1301	19503	19503	5.42707
26.4	6	-78.6901	20826.5	20826.5	5.42707	7	38.6598	13449.3	13449.3	6.4578	7	-59.0362	13578.2	13578.2	5.82693	7	-59.0362	12007.8	12007.8	5.66666	801	1.01466e+06	1.01466e+06	6	-45	19868.8	19868.8	5.27787	7	99.4623	11377	11377	6.18705	7	-9.46232	15585.2	15585.2	5.50373	6	-53.1301	19280.4	19280.4	5.42707
26.6	6	-78.6901	23427.1	23427.1	5.42707	7	38.6598	11002	11002	6.4578	7	-59.0362	12272.8	12272.8	5.82693	7	-59.0362	14023.8	14023.8	5.66666	801	1.01161e+06	1.01161e+06	6	-45	19236.8	19236.8	5.27787	7	99.4623	11702.6	11702.6	6.18705	7	-9.46232	15575.7	15575.7	5.50373	6	-53.1301	22717.6	22717.6	5.42707
26.8	6	-78.6901	17744.3	17744.3	5.42707	7	38.6598	12212.3	12212.3	6.4578	7	-59.0362	11842.5	11842.5	5.82693	7	-59.0362	11544.9	11544.9	5.66666	801	1.02662e+06	1.02662e+06	6	-45	21420.3	21420.3	5.27787	7	99.4623	15372.4	15372.4	6.18705	7	-9.46232	16030	16030	5.50373	6	-53.1301	25625.9	25625.9	5.42707
27	6	-78.6901	12046.2	12046.2	5.42707	7	38.6598	12161.7	12161.7	6.4578	7	-59.0362	14025.4	14025.4	5.82693	7	-59.0362	11915.6	11915.6	5.66666	801	1.01405e+06	1.01405e+06	6	-45	24670.9	24670.9	5.27787	7	99.4623	15105.2	15105.2	6.18705	7	-9.46232	15940.4	15940.4	5.50373	6	-53.1301	26066.4	26066.4	5.42707
27.2	6	-78.6901	11699.6	11699.6	5.42707	7	38.6598	15158.8	15158.8	6.4578	7	-59.0362	14273.7	14273.7	5.82693	7	-59.0362	12571.6	12571.6	5.66666	801	1.01871e+06	1.01871e+06	6	-45	14527.9	14527.9	5.27787	7	99.4623	14443.2	14443.2	6.18705	7	-9.46232	11867.6	11867.6	5.50373	6	-53.1301	23293.8	23293.8	5.42707
27.4	6	-78.6901	15212.1	15212.1	5.42707	7	38.6598	12968.5	12968.5	6.4578	7	-59.0362	12770.6	12770.6	5.82693	7	-59.0362	11572.8	11572.8	5.66666	801	954796	954796	6	-45	14249.1	14249.1	5.27787	7	99.4623	14117.1	14117.1	6.18705	7	-9.46232	13198.3	13198.3	5.50373	6	-53.1301	24584.1	24584.1	5.42707
27.6	6	-78.6901	15214.4	15214.4	5.42707	7	38.6598	16136.6	16136.6	6.4578	7	-59.0362	14140.1	14140.1	5.82693	7	-59.0362	10347	10347	5.66666	801	1.03543e+06	1.03543e+06	6	-45	13705.4	13705.4	5.27787	7	99.4623	10143.3	10143.3	6.18705	7	-9.46232	13601.4	13601.4	5.50373	6	-53.1301	22367.1	22367.1	5.42707
27.8	6	-78.6901	13704.8	13704.8	5.42707	7	38.6598	21733.1	21733.1	6.4578	7	-59.0362	15561.6	15561.6	5.82693	7	-59.0362	14437.6	14437.6	5.66666	801	1.04386e+06	1.04386e+06	6	-45	14980.1	14980.1	5.27787	7	99.4623	12152.7	12152.7	6.18705	7	-9.46232	12590.8	12590.8	5.50373	6	-53.1301	23023.1	23023.1	5.42707
28	6	-78.6901	15834.9	15834.9	5.42707	7	38.6598	24651.5	24651.5	6.4578	7	-59.0362	13731.2	13731.2	5.82693	7	-59.0362	14534.6	14534.6	5.66666	801	1.06078e+06	1.06078e+06	6	-45	11789.7	11789.7	5.27787	7	99.4623	11933.1	11933.1	6.18705	7	-9.46232	14680.7	14680.7	5.50373	6	-53.1301	16908	16908	5.42707
28.2	6	-78.6901	15379.2	15379.2	5.42707	7	38.6598	22418.9	22418.9	6.4578	7	-59.0362	10860	10860	5.82693	7	-59.0362	16126.2	16126.2	5.66666	801	996845	996845	6	-45	12585.1	12585.1	5.27787	7	99.4623	13449	13449	6.18705	7	-9.46232	13055.5	13055.5	5.50373	6	-53.1301	22979.5	22979.5	5.42707
28.4	6	-78.6901	16552.3	16552.3	5.42707	7	38.6598	15591.5	15591.5	6.4578	7	-59.0362	15982	15982	5.82693	7	-59.0362	16559.6	16559.6	5.66666	801	995609	995609	6	-45	12227.4	12227.4	5.27787	7	99.4623	14833.9	14833.9	6.18705	7	-9.46232	16857.8	16857.8	5.50373	6	-53.1301	26697.3	26697.3	5.42707
28.6	6	-78.6901	20881.3	20881.3	5.42707	7	38.6598	15386.2	15386.2	6.4578	7	-59.0362	11700.8	11700.8	5.82693	7	-59.0362	14815.6	14815.6	5.66666	801	1.05147e+06	1.05147e+06	6	-45	14609.3	14609.3	5.27787	7	99.4623	13100.3	13100.3	6.18705	7	-9.46232	12899.5	12899.5	5.50373	6	-53.1301	22141.9	22141.9	5.42707
28.8	6	-78.6901	14810.5	14810.5	5.42707	7	38.6598	14189.6	14189.6	6.4578	7	-59.0362	11523.3	11523.3	5.82693	7	-59.0362	20268.1	20268.1	5.66666	801	1.01241e+06	1.01241e+06	6	-45	15124.7	15124.7	5.27787	7	99.4623	11316.1	11316.1	6.18705	7	-9.46232	12030.2	12030.2	5.50373	6	-53.1301	20266.1	20266.1	5.42707
29	6	-78.6901	17830.5	17830.5	5.42707	7	38.6598	17926.7	17926.7	6.4578	7	-59.0362	11194.6	11194.6	5.82693	7	-59.0362	16102	16102	5.66666	801	1.02882e+06	1.02882e+06	6	-45	12776.4	12776.4	5.27787	7	99.4623	12970.4	12970.4	6.18705	7	-9.46232	13439.5	13439.5	5.50373	6	-53.1301	17084.3	17084.3	5.42707
29.2	6	-78.6901	15738.3	15738.3	5.42707	7	38.6598	20459.9	20459.9	6.4578	7	-59.0362	14943.8	14943.8	5.82693	7	-59.0362	15855	15855	5.66666	801	1.00416e+06	1.00416e+06	6	-45	13831.2	13831.2	5.27787	7	99.4623	10857.3	10857.3	6.18705	7	-9.46232	13953.8	13953.8	5.50373	6	-53.1301	24167.4	24167.4	5.42707
29.4	6	-78.6901	12855.3	12855.3	5.42707	7	38.6598	15711.8	15711.8	6.4578	7	-59.0362	9722.84	9722.84	5.82693	7	-59.0362	15012.2	15012.2	5.66666	801	974786	974786	6	-45	10949.9	10949.9	5.27787	7	99.4623	13042.8	13042.8	6.18705	7	-9.46232	17092.8	17092.8	5.50373	6	-53.1301	19629.7	19629.7	5.42707
29.6	6	-78.6901	16271.6	16271.6	5.42707	7	38.6598	15902.1	15902.1	6.4578	7	-59.0362	13399.4	13399.4	5.82693	7	-59.0362	16034.9	16034.9	5.66666	801	1.00449e+06	1.00449e+06	6	-45	13117.7	13117.7	5.27787	7	99.4623	11873	11873	6.18705	7	-9.46232	12146.5	12146.5	5.50373	6	-53.1301	16632.2	16632.2	5.42707
29.8	6	-78.6901	15557.9	15557.9	5.42707	7	38.6598	19566.2	19566.2	6.4578	7	-59.0362	15458.8	15458.8	5.82693	7	-59.0362	11843.2	11843.2	5.66666	801	995244	995244	6	-45	11757.2	11757.2	5.27787	7	99.4623	13228.5	13228.5	6.18705	7	-9.46232	12062.5	12062.5	5.50373	6	-53.1301	17259	17259	5.42707
30	6	-78.6901	17976.8	17976.8	5.42707	7	38.6598	21305	21305	6.4578	7	-59.0362	11159.4	11159.4	5.82693	7	-59.0362	15457.3	15457.3	5.66666	801	1018379	1018379	6	-45	10715.4	10715.4	5.27787	7	99.4623	14089.9	14089.9	6.18705	7	-9.46232	12335.6	12335.6	5.50373	6	-53.1301	17116.9	17116.9	5.42707
			Background value for each axon
Time (s)	IntDen5	Area5			Area1	Area2	Area3	Area4	Area6	Area7	Area8	Area9		R1	R2	R3	R4	R6	R7	R8	R9
0	1.03264e+06	801	1289.19		6	7	7	7	6	7	7	6		7735.13	9024.31	9024.31	9024.31	7735.13	9024.31	9024.31	7735.13
0.2	983932	801	1228.38		6	7	7	7	6	7	7	6		7370.28	8598.66	8598.66	8598.66	7370.28	8598.66	8598.66	7370.28
0.4	983096	801	1227.34		6	7	7	7	6	7	7	6		7364.02	8591.36	8591.36	8591.36	7364.02	8591.36	8591.36	7364.02
0.6	958417	801	1196.53		6	7	7	7	6	7	7	6		7179.15	8375.68	8375.68	8375.68	7179.15	8375.68	8375.68	7179.15
0.8	988757	801	1234.4		6	7	7	7	6	7	7	6		7406.42	8640.82	8640.82	8640.82	7406.42	8640.82	8640.82	7406.42
1	932684	801	1164.4		6	7	7	7	6	7	7	6		6986.39	8150.79	8150.79	8150.79	6986.39	8150.79	8150.79	6986.39
1.2	974758	801	1216.93		6	7	7	7	6	7	7	6		7301.56	8518.48	8518.48	8518.48	7301.56	8518.48	8518.48	7301.56
1.4	1008627	801	1259.21		6	7	7	7	6	7	7	6		7555.26	8814.47	8814.47	8814.47	7555.26	8814.47	8814.47	7555.26
1.6	999344	801	1247.62		6	7	7	7	6	7	7	6		7485.72	8733.34	8733.34	8733.34	7485.72	8733.34	8733.34	7485.72
1.8	938725	801	1171.94		6	7	7	7	6	7	7	6		7031.65	8203.59	8203.59	8203.59	7031.65	8203.59	8203.59	7031.65
2	987926	801	1233.37		6	7	7	7	6	7	7	6		7400.2	8633.56	8633.56	8633.56	7400.2	8633.56	8633.56	7400.2
2.2	947800	801	1183.27		6	7	7	7	6	7	7	6		7099.62	8282.89	8282.89	8282.89	7099.62	8282.89	8282.89	7099.62
2.4	1.01604e+06	801	1268.46		6	7	7	7	6	7	7	6		7610.79	8879.25	8879.25	8879.25	7610.79	8879.25	8879.25	7610.79
2.6	954844	801	1192.06		6	7	7	7	6	7	7	6		7152.39	8344.45	8344.45	8344.45	7152.39	8344.45	8344.45	7152.39
2.8	1.00269e+06	801	1251.8		6	7	7	7	6	7	7	6		7510.77	8762.57	8762.57	8762.57	7510.77	8762.57	8762.57	7510.77
3	985159	801	1229.91		6	7	7	7	6	7	7	6		7379.47	8609.38	8609.38	8609.38	7379.47	8609.38	8609.38	7379.47
3.2	963582	801	1202.97		6	7	7	7	6	7	7	6		7217.84	8420.82	8420.82	8420.82	7217.84	8420.82	8420.82	7217.84
3.4	978926	801	1222.13		6	7	7	7	6	7	7	6		7332.78	8554.91	8554.91	8554.91	7332.78	8554.91	8554.91	7332.78
3.6	971369	801	1212.7		6	7	7	7	6	7	7	6		7276.17	8488.87	8488.87	8488.87	7276.17	8488.87	8488.87	7276.17
3.8	979272	801	1222.56		6	7	7	7	6	7	7	6		7335.37	8557.93	8557.93	8557.93	7335.37	8557.93	8557.93	7335.37
4	1.02574e+06	801	1280.58		6	7	7	7	6	7	7	6		7683.46	8964.03	8964.03	8964.03	7683.46	8964.03	8964.03	7683.46
4.2	973848	801	1215.79		6	7	7	7	6	7	7	6		7294.74	8510.53	8510.53	8510.53	7294.74	8510.53	8510.53	7294.74
4.4	949528	801	1185.43		6	7	7	7	6	7	7	6		7112.57	8297.99	8297.99	8297.99	7112.57	8297.99	8297.99	7112.57
4.6	1.0056e+06	801	1255.43		6	7	7	7	6	7	7	6		7532.58	8788.01	8788.01	8788.01	7532.58	8788.01	8788.01	7532.58
4.8	953759	801	1190.71		6	7	7	7	6	7	7	6		7144.26	8334.97	8334.97	8334.97	7144.26	8334.97	8334.97	7144.26
5	968487	801	1209.1		6	7	7	7	6	7	7	6		7254.58	8463.68	8463.68	8463.68	7254.58	8463.68	8463.68	7254.58
5.2	983642	801	1228.02		6	7	7	7	6	7	7	6		7368.1	8596.12	8596.12	8596.12	7368.1	8596.12	8596.12	7368.1
5.4	978173	801	1221.19		6	7	7	7	6	7	7	6		7327.14	8548.33	8548.33	8548.33	7327.14	8548.33	8548.33	7327.14
5.6	1.00324e+06	801	1252.48		6	7	7	7	6	7	7	6		7514.9	8767.39	8767.39	8767.39	7514.9	8767.39	8767.39	7514.9
5.8	969145	801	1209.92		6	7	7	7	6	7	7	6		7259.51	8469.43	8469.43	8469.43	7259.51	8469.43	8469.43	7259.51
6	973996	801	1215.98		6	7	7	7	6	7	7	6		7295.85	8511.83	8511.83	8511.83	7295.85	8511.83	8511.83	7295.85
6.2	970305	801	1211.37		6	7	7	7	6	7	7	6		7268.2	8479.57	8479.57	8479.57	7268.2	8479.57	8479.57	7268.2
6.4	989078	801	1234.8		6	7	7	7	6	7	7	6		7408.83	8643.63	8643.63	8643.63	7408.83	8643.63	8643.63	7408.83
6.6	964922	801	1204.65		6	7	7	7	6	7	7	6		7227.88	8432.53	8432.53	8432.53	7227.88	8432.53	8432.53	7227.88
6.8	963332	801	1202.66		6	7	7	7	6	7	7	6		7215.97	8418.63	8418.63	8418.63	7215.97	8418.63	8418.63	7215.97
7	983647	801	1228.02		6	7	7	7	6	7	7	6		7368.14	8596.16	8596.16	8596.16	7368.14	8596.16	8596.16	7368.14
7.2	1.03562e+06	801	1292.91		6	7	7	7	6	7	7	6		7757.48	9050.4	9050.4	9050.4	7757.48	9050.4	9050.4	7757.48
7.4	976505	801	1219.11		6	7	7	7	6	7	7	6		7314.64	8533.75	8533.75	8533.75	7314.64	8533.75	8533.75	7314.64
7.6	1.00744e+06	801	1257.73		6	7	7	7	6	7	7	6		7546.35	8804.08	8804.08	8804.08	7546.35	8804.08	8804.08	7546.35
7.8	940377	801	1174		6	7	7	7	6	7	7	6		7044.02	8218.02	8218.02	8218.02	7044.02	8218.02	8218.02	7044.02
8	982433	801	1226.51		6	7	7	7	6	7	7	6		7359.05	8585.56	8585.56	8585.56	7359.05	8585.56	8585.56	7359.05
8.2	973003	801	1214.74		6	7	7	7	6	7	7	6		7288.41	8503.15	8503.15	8503.15	7288.41	8503.15	8503.15	7288.41
8.4	964613	801	1204.26		6	7	7	7	6	7	7	6		7225.56	8429.82	8429.82	8429.82	7225.56	8429.82	8429.82	7225.56
8.6	1.01221e+06	801	1263.68		6	7	7	7	6	7	7	6		7582.07	8845.75	8845.75	8845.75	7582.07	8845.75	8845.75	7582.07
8.8	960825	801	1199.53		6	7	7	7	6	7	7	6		7197.19	8396.73	8396.73	8396.73	7197.19	8396.73	8396.73	7197.19
9	987775	801	1233.18		6	7	7	7	6	7	7	6		7399.06	8632.24	8632.24	8632.24	7399.06	8632.24	8632.24	7399.06
9.2	974921	801	1217.13		6	7	7	7	6	7	7	6		7302.78	8519.91	8519.91	8519.91	7302.78	8519.91	8519.91	7302.78
9.4	992609	801	1239.21		6	7	7	7	6	7	7	6		7435.27	8674.48	8674.48	8674.48	7435.27	8674.48	8674.48	7435.27
9.6	1.00615e+06	801	1256.12		6	7	7	7	6	7	7	6		7536.73	8792.85	8792.85	8792.85	7536.73	8792.85	8792.85	7536.73
9.8	975430	801	1217.76		6	7	7	7	6	7	7	6		7306.59	8524.35	8524.35	8524.35	7306.59	8524.35	8524.35	7306.59
10	984424	801	1228.99		6	7	7	7	6	7	7	6		7373.96	8602.95	8602.95	8602.95	7373.96	8602.95	8602.95	7373.96
10.2	1015656	801	1267.99		6	7	7	7	6	7	7	6		7607.91	8875.9	8875.9	8875.9	7607.91	8875.9	8875.9	7607.91
10.4	994530	801	1241.61		6	7	7	7	6	7	7	6		7449.67	8691.28	8691.28	8691.28	7449.67	8691.28	8691.28	7449.67
10.6	1.00677e+06	801	1256.89		6	7	7	7	6	7	7	6		7541.36	8798.26	8798.26	8798.26	7541.36	8798.26	8798.26	7541.36
10.8	999844	801	1248.24		6	7	7	7	6	7	7	6		7489.47	8737.71	8737.71	8737.71	7489.47	8737.71	8737.71	7489.47
11	1.00574e+06	801	1255.61		6	7	7	7	6	7	7	6		7533.65	8789.26	8789.26	8789.26	7533.65	8789.26	8789.26	7533.65
11.2	952372	801	1188.98		6	7	7	7	6	7	7	6		7133.87	8322.85	8322.85	8322.85	7133.87	8322.85	8322.85	7133.87
11.4	994116	801	1241.09		6	7	7	7	6	7	7	6		7446.56	8687.66	8687.66	8687.66	7446.56	8687.66	8687.66	7446.56
11.6	981224	801	1225		6	7	7	7	6	7	7	6		7349.99	8574.99	8574.99	8574.99	7349.99	8574.99	8574.99	7349.99
11.8	1.02394e+06	801	1278.33		6	7	7	7	6	7	7	6		7669.98	8948.31	8948.31	8948.31	7669.98	8948.31	8948.31	7669.98
12	947110	801	1182.41		6	7	7	7	6	7	7	6		7094.45	8276.86	8276.86	8276.86	7094.45	8276.86	8276.86	7094.45
12.2	940959	801	1174.73		6	7	7	7	6	7	7	6		7048.38	8223.11	8223.11	8223.11	7048.38	8223.11	8223.11	7048.38
12.4	922956	801	1152.25		6	7	7	7	6	7	7	6		6913.53	8065.78	8065.78	8065.78	6913.53	8065.78	8065.78	6913.53
12.6	988698	801	1234.33		6	7	7	7	6	7	7	6		7405.98	8640.31	8640.31	8640.31	7405.98	8640.31	8640.31	7405.98
12.8	1.01077e+06	801	1261.88		6	7	7	7	6	7	7	6		7571.28	8833.16	8833.16	8833.16	7571.28	8833.16	8833.16	7571.28
13	1.00091e+06	801	1249.57		6	7	7	7	6	7	7	6		7497.44	8747.02	8747.02	8747.02	7497.44	8747.02	8747.02	7497.44
13.2	1.00003e+06	801	1248.48		6	7	7	7	6	7	7	6		7490.86	8739.33	8739.33	8739.33	7490.86	8739.33	8739.33	7490.86
13.4	968997	801	1209.73		6	7	7	7	6	7	7	6		7258.41	8468.14	8468.14	8468.14	7258.41	8468.14	8468.14	7258.41
13.6	1.02917e+06	801	1284.86		6	7	7	7	6	7	7	6		7709.15	8994.01	8994.01	8994.01	7709.15	8994.01	8994.01	7709.15
13.8	944104	801	1178.66		6	7	7	7	6	7	7	6		7071.94	8250.6	8250.6	8250.6	7071.94	8250.6	8250.6	7071.94
14	983049	801	1227.28		6	7	7	7	6	7	7	6		7363.67	8590.94	8590.94	8590.94	7363.67	8590.94	8590.94	7363.67
14.2	997064	801	1244.77		6	7	7	7	6	7	7	6		7468.64	8713.42	8713.42	8713.42	7468.64	8713.42	8713.42	7468.64
14.4	995337	801	1242.62		6	7	7	7	6	7	7	6		7455.71	8698.33	8698.33	8698.33	7455.71	8698.33	8698.33	7455.71
14.6	1.02297e+06	801	1277.12		6	7	7	7	6	7	7	6		7662.73	8939.85	8939.85	8939.85	7662.73	8939.85	8939.85	7662.73
14.8	973507	801	1215.36		6	7	7	7	6	7	7	6		7292.19	8507.55	8507.55	8507.55	7292.19	8507.55	8507.55	7292.19
15	1.00583e+06	801	1255.72		6	7	7	7	6	7	7	6		7534.31	8790.03	8790.03	8790.03	7534.31	8790.03	8790.03	7534.31
15.2	1.03195e+06	801	1288.33		6	7	7	7	6	7	7	6		7729.97	9018.3	9018.3	9018.3	7729.97	9018.3	9018.3	7729.97
15.4	981083	801	1224.82		6	7	7	7	6	7	7	6		7348.94	8573.76	8573.76	8573.76	7348.94	8573.76	8573.76	7348.94
15.6	966847	801	1207.05		6	7	7	7	6	7	7	6		7242.3	8449.35	8449.35	8449.35	7242.3	8449.35	8449.35	7242.3
15.8	983106	801	1227.35		6	7	7	7	6	7	7	6		7364.09	8591.44	8591.44	8591.44	7364.09	8591.44	8591.44	7364.09
16	1.0101e+06	801	1261.05		6	7	7	7	6	7	7	6		7566.29	8827.34	8827.34	8827.34	7566.29	8827.34	8827.34	7566.29
16.2	1.01104e+06	801	1262.22		6	7	7	7	6	7	7	6		7573.32	8835.54	8835.54	8835.54	7573.32	8835.54	8835.54	7573.32
16.4	962333	801	1201.41		6	7	7	7	6	7	7	6		7208.49	8409.9	8409.9	8409.9	7208.49	8409.9	8409.9	7208.49
16.6	1.0128e+06	801	1264.42		6	7	7	7	6	7	7	6		7586.5	8850.92	8850.92	8850.92	7586.5	8850.92	8850.92	7586.5
16.8	948842	801	1184.57		6	7	7	7	6	7	7	6		7107.43	8292.01	8292.01	8292.01	7107.43	8292.01	8292.01	7107.43
17	1.02465e+06	801	1279.21		6	7	7	7	6	7	7	6		7675.27	8954.48	8954.48	8954.48	7675.27	8954.48	8954.48	7675.27
17.2	983453	801	1227.78		6	7	7	7	6	7	7	6		7366.69	8594.47	8594.47	8594.47	7366.69	8594.47	8594.47	7366.69
17.4	1.03645e+06	801	1293.94		6	7	7	7	6	7	7	6		7763.65	9057.59	9057.59	9057.59	7763.65	9057.59	9057.59	7763.65
17.6	1.05319e+06	801	1314.85		6	7	7	7	6	7	7	6		7889.07	9203.92	9203.92	9203.92	7889.07	9203.92	9203.92	7889.07
17.8	985133	801	1229.88		6	7	7	7	6	7	7	6		7379.27	8609.15	8609.15	8609.15	7379.27	8609.15	8609.15	7379.27
18	981571	801	1225.43		6	7	7	7	6	7	7	6		7352.59	8578.02	8578.02	8578.02	7352.59	8578.02	8578.02	7352.59
18.2	1.00108e+06	801	1249.79		6	7	7	7	6	7	7	6		7498.72	8748.5	8748.5	8748.5	7498.72	8748.5	8748.5	7498.72
18.4	987001	801	1232.21		6	7	7	7	6	7	7	6		7393.27	8625.48	8625.48	8625.48	7393.27	8625.48	8625.48	7393.27
18.6	1.02043e+06	801	1273.94		6	7	7	7	6	7	7	6		7643.66	8917.61	8917.61	8917.61	7643.66	8917.61	8917.61	7643.66
18.8	969927	801	1210.9		6	7	7	7	6	7	7	6		7265.37	8476.27	8476.27	8476.27	7265.37	8476.27	8476.27	7265.37
19	1.00648e+06	801	1256.53		6	7	7	7	6	7	7	6		7539.17	8795.69	8795.69	8795.69	7539.17	8795.69	8795.69	7539.17
19.2	1.00806e+06	801	1258.5		6	7	7	7	6	7	7	6		7550.97	8809.47	8809.47	8809.47	7550.97	8809.47	8809.47	7550.97
19.4	999336	801	1247.61		6	7	7	7	6	7	7	6		7485.66	8733.27	8733.27	8733.27	7485.66	8733.27	8733.27	7485.66
19.6	979028	801	1222.26		6	7	7	7	6	7	7	6		7333.54	8555.8	8555.8	8555.8	7333.54	8555.8	8555.8	7333.54
19.8	1.02327e+06	801	1277.5		6	7	7	7	6	7	7	6		7664.97	8942.47	8942.47	8942.47	7664.97	8942.47	8942.47	7664.97
20	1018792	801	1271.9		6	7	7	7	6	7	7	6		7631.4	8903.3	8903.3	8903.3	7631.4	8903.3	8903.3	7631.4
20.2	1.00628e+06	801	1256.29		6	7	7	7	6	7	7	6		7537.71	8794	8794	8794	7537.71	8794	8794	7537.71
20.4	994182	801	1241.18		6	7	7	7	6	7	7	6		7447.05	8688.23	8688.23	8688.23	7447.05	8688.23	8688.23	7447.05
20.6	1.05786e+06	801	1320.67		6	7	7	7	6	7	7	6		7924.03	9244.71	9244.71	9244.71	7924.03	9244.71	9244.71	7924.03
20.8	1.03019e+06	801	1286.13		6	7	7	7	6	7	7	6		7716.8	9002.93	9002.93	9002.93	7716.8	9002.93	9002.93	7716.8
21	997792	801	1245.68		6	7	7	7	6	7	7	6		7474.1	8719.78	8719.78	8719.78	7474.1	8719.78	8719.78	7474.1
21.2	1.00878e+06	801	1259.4		6	7	7	7	6	7	7	6		7556.41	8815.82	8815.82	8815.82	7556.41	8815.82	8815.82	7556.41
21.4	1.00212e+06	801	1251.08		6	7	7	7	6	7	7	6		7506.51	8757.59	8757.59	8757.59	7506.51	8757.59	8757.59	7506.51
21.6	1.00802e+06	801	1258.45		6	7	7	7	6	7	7	6		7550.71	8809.17	8809.17	8809.17	7550.71	8809.17	8809.17	7550.71
21.8	993079	801	1239.8		6	7	7	7	6	7	7	6		7438.79	8678.59	8678.59	8678.59	7438.79	8678.59	8678.59	7438.79
22	988215	801	1233.73		6	7	7	7	6	7	7	6		7402.36	8636.08	8636.08	8636.08	7402.36	8636.08	8636.08	7402.36
22.2	971422	801	1212.76		6	7	7	7	6	7	7	6		7276.57	8489.33	8489.33	8489.33	7276.57	8489.33	8489.33	7276.57
22.4	1.02243e+06	801	1276.45		6	7	7	7	6	7	7	6		7658.68	8935.12	8935.12	8935.12	7658.68	8935.12	8935.12	7658.68
22.6	978712	801	1221.86		6	7	7	7	6	7	7	6		7331.18	8553.04	8553.04	8553.04	7331.18	8553.04	8553.04	7331.18
22.8	999371	801	1247.65		6	7	7	7	6	7	7	6		7485.93	8733.58	8733.58	8733.58	7485.93	8733.58	8733.58	7485.93
23	983846	801	1228.27		6	7	7	7	6	7	7	6		7369.63	8597.91	8597.91	8597.91	7369.63	8597.91	8597.91	7369.63
23.2	1.00829e+06	801	1258.79		6	7	7	7	6	7	7	6		7552.76	8811.56	8811.56	8811.56	7552.76	8811.56	8811.56	7552.76
23.4	970391	801	1211.47		6	7	7	7	6	7	7	6		7268.84	8480.32	8480.32	8480.32	7268.84	8480.32	8480.32	7268.84
23.6	951820	801	1188.29		6	7	7	7	6	7	7	6		7129.74	8318.03	8318.03	8318.03	7129.74	8318.03	8318.03	7129.74
23.8	978364	801	1221.43		6	7	7	7	6	7	7	6		7328.57	8550	8550	8550	7328.57	8550	8550	7328.57
24	1.00543e+06	801	1255.22		6	7	7	7	6	7	7	6		7531.3	8786.52	8786.52	8786.52	7531.3	8786.52	8786.52	7531.3
24.2	986693	801	1231.83		6	7	7	7	6	7	7	6		7390.96	8622.78	8622.78	8622.78	7390.96	8622.78	8622.78	7390.96
24.4	981312	801	1225.11		6	7	7	7	6	7	7	6		7350.65	8575.76	8575.76	8575.76	7350.65	8575.76	8575.76	7350.65
24.6	1.01164e+06	801	1262.97		6	7	7	7	6	7	7	6		7577.82	8840.79	8840.79	8840.79	7577.82	8840.79	8840.79	7577.82
24.8	1.00225e+06	801	1251.25		6	7	7	7	6	7	7	6		7507.48	8758.73	8758.73	8758.73	7507.48	8758.73	8758.73	7507.48
25	1.0263e+06	801	1281.27		6	7	7	7	6	7	7	6		7687.62	8968.89	8968.89	8968.89	7687.62	8968.89	8968.89	7687.62
25.2	954603	801	1191.76		6	7	7	7	6	7	7	6		7150.58	8342.35	8342.35	8342.35	7150.58	8342.35	8342.35	7150.58
25.4	1.00997e+06	801	1260.88		6	7	7	7	6	7	7	6		7565.3	8826.19	8826.19	8826.19	7565.3	8826.19	8826.19	7565.3
25.6	1.08234e+06	801	1351.24		6	7	7	7	6	7	7	6		8107.42	9458.65	9458.65	9458.65	8107.42	9458.65	9458.65	8107.42
25.8	959130	801	1197.42		6	7	7	7	6	7	7	6		7184.49	8381.91	8381.91	8381.91	7184.49	8381.91	8381.91	7184.49
26	1.00362e+06	801	1252.96		6	7	7	7	6	7	7	6		7517.77	8770.73	8770.73	8770.73	7517.77	8770.73	8770.73	7517.77
26.2	986399	801	1231.46		6	7	7	7	6	7	7	6		7388.76	8620.22	8620.22	8620.22	7388.76	8620.22	8620.22	7388.76
26.4	1.01466e+06	801	1266.74		6	7	7	7	6	7	7	6		7600.45	8867.19	8867.19	8867.19	7600.45	8867.19	8867.19	7600.45
26.6	1.01161e+06	801	1262.94		6	7	7	7	6	7	7	6		7577.62	8840.56	8840.56	8840.56	7577.62	8840.56	8840.56	7577.62
26.8	1.02662e+06	801	1281.67		6	7	7	7	6	7	7	6		7690.05	8971.72	8971.72	8971.72	7690.05	8971.72	8971.72	7690.05
27	1.01405e+06	801	1265.98		6	7	7	7	6	7	7	6		7595.87	8861.84	8861.84	8861.84	7595.87	8861.84	8861.84	7595.87
27.2	1.01871e+06	801	1271.8		6	7	7	7	6	7	7	6		7630.79	8902.59	8902.59	8902.59	7630.79	8902.59	8902.59	7630.79
27.4	954796	801	1192		6	7	7	7	6	7	7	6		7152.03	8344.03	8344.03	8344.03	7152.03	8344.03	8344.03	7152.03
27.6	1.03543e+06	801	1292.67		6	7	7	7	6	7	7	6		7756.02	9048.69	9048.69	9048.69	7756.02	9048.69	9048.69	7756.02
27.8	1.04386e+06	801	1303.2		6	7	7	7	6	7	7	6		7819.2	9122.4	9122.4	9122.4	7819.2	9122.4	9122.4	7819.2
28	1.06078e+06	801	1324.32		6	7	7	7	6	7	7	6		7945.94	9270.26	9270.26	9270.26	7945.94	9270.26	9270.26	7945.94
28.2	996845	801	1244.5		6	7	7	7	6	7	7	6		7467	8711.5	8711.5	8711.5	7467	8711.5	8711.5	7467
28.4	995609	801	1242.96		6	7	7	7	6	7	7	6		7457.74	8700.7	8700.7	8700.7	7457.74	8700.7	8700.7	7457.74
28.6	1.05147e+06	801	1312.69		6	7	7	7	6	7	7	6		7876.16	9188.85	9188.85	9188.85	7876.16	9188.85	9188.85	7876.16
28.8	1.01241e+06	801	1263.94		6	7	7	7	6	7	7	6		7583.62	8847.55	8847.55	8847.55	7583.62	8847.55	8847.55	7583.62
29	1.02882e+06	801	1284.42		6	7	7	7	6	7	7	6		7706.54	8990.96	8990.96	8990.96	7706.54	8990.96	8990.96	7706.54
29.2	1.00416e+06	801	1253.63		6	7	7	7	6	7	7	6		7521.78	8775.41	8775.41	8775.41	7521.78	8775.41	8775.41	7521.78
29.4	974786	801	1216.96		6	7	7	7	6	7	7	6		7301.77	8518.73	8518.73	8518.73	7301.77	8518.73	8518.73	7301.77
29.6	1.00449e+06	801	1254.04		6	7	7	7	6	7	7	6		7524.25	8778.29	8778.29	8778.29	7524.25	8778.29	8778.29	7524.25
29.8	995244	801	1242.5		6	7	7	7	6	7	7	6		7455.01	8697.51	8697.51	8697.51	7455.01	8697.51	8697.51	7455.01
30	1018379	801	1271.38		6	7	7	7	6	7	7	6		7628.31	8899.69	8899.69	8899.69	7628.31	8899.69	8899.69	7628.31
			Background corrected data
Time (s)	Axon1	Axon2	Axon3	Axon4	Axon6	Axon7	Axon8	Axon9
0	7267.08	7015.72	9052.22	7433.1	5885.63	4280.02	6054.74	4436.93
0.2	6389.58	5545.46	5847.17	6385.68	5112	1436.47	13795.7	5397
0.4	4567.72	9327.11	8911.36	5831.63	3835.78	2027.26	9989.37	5000.75
0.6	4508.22	12794.1	7110.97	6722.21	4960.84	5352.88	14222.5	4527.77
0.8	3753.37	11781.1	7027.32	6588.7	6215.11	2518.21	12970	3838.18
1	10405.8	16180.3	8379.12	11080.6	3811.17	3928.63	13345.3	4906.08
1.2	6433.97	7869.32	6187.88	7288.65	4925.25	3069.83	13940.9	3754.95
1.4	10123.4	9581.31	4700.61	9472.07	8575.14	2400.4	8151.57	5029.3
1.6	12754.6	14587.2	5421.05	6038.74	6092.24	6332.41	7589.67	2830.53
1.8	10605	14456.5	8054.85	10747	4286.33	4811.31	7565.05	3000.28
2	10214.1	11571.3	6224.85	7606.38	6678.11	2506.96	9152.92	2167.67
2.2	7933.74	8402.52	7105.8	14145.5	7101.61	5288.69	12174.8	4781.33
2.4	8553.29	5977.09	3502.63	8919.81	5753.2	3475.48	6559.95	6080.99
2.6	6196.45	7920.05	6812.02	13018	5225.79	2248.58	10864.7	4470.78
2.8	6784.61	11213.9	6684.8	13314.3	5048.98	3828.06	8196.59	2134.32
3	5745.92	8039.79	5873.31	7791.85	3801.38	3528.57	6884.07	4444.31
3.2	6295	6086.49	11487.2	7407.7	4779.27	5541.6	8751.3	2323.4
3.4	4115.45	8726.97	15008.6	14772	6448.85	6239.57	6712.09	6777.52
3.6	4321.52	10212.7	16248.2	12386.2	4272.71	4515.19	9144.4	3728.59
3.8	3082.87	9780.73	18296.8	12025.7	5681.18	694.457	8402.76	4067.66
4	5928.08	9070.06	15264.7	12168.5	5124.76	5961.13	4624.92	3616.13
4.2	4010.55	10337.6	8801.28	9376.62	6113.02	3258.03	4943.45	7490.2
4.4	4808.58	19536.8	7538.29	12517.5	3316.02	3715.59	7962.95	12761.6
4.6	8504.31	26565.1	8149.12	14813.6	4652.23	4568.75	10806.3	15866.6
4.8	7387.53	34459.7	7993.32	11132.4	5845.17	5603.56	8249.99	17371.4
5	8732.15	21243.4	7741.05	12345.3	6815.23	7069.21	7825.48	22869
5.2	8464.19	26693.6	3680.69	6630.68	8905.14	6001.61	3332.05	32776.3
5.4	6762.44	23867	6623.95	9706.6	9164.13	4365.33	6415.08	31388.6
5.6	10968.1	25054.4	3633.19	12212.6	5131.76	3471.24	4126.95	31521.6
5.8	11855.9	28553.1	1316.63	8227.94	7253.59	2442.26	8033.44	33422.7
6	8033.73	30976.6	4556.41	8984.84	10523	3596.82	12660.3	33829
6.2	13020.5	29062.6	6972.76	8608.61	6110.01	1975.54	7269.75	31105.7
6.4	8067.91	14916.6	9711.76	8709.88	8793.36	6059.87	10442.4	37010.8
6.6	8665.64	10839.6	9055.85	9883.53	8587.34	4569.19	15310.2	34452.5
6.8	12061.5	10516.8	6231.3	12816.7	6792.7	5233.56	12548.9	40456.7
7	9646.7	13532.3	6934.9	4150.38	6117.67	6312.94	9223.43	38496.1
7.2	10028.5	10754.9	8812.45	13667.4	8007.36	3706.17	8651.42	41460.1
7.4	8878.57	15772.7	8027.19	9498.97	7027.66	7267.05	7313.61	40833.2
7.6	5190.04	14133.9	8466.64	7862.97	6744.78	5633.59	6875.67	33193.9
7.8	10231.7	10786.4	9365.17	12705.4	7650.17	5131.41	9026.12	33091.8
8	9214.1	10957.8	9564.07	8148.44	8487.2	6324.48	10447.9	34520.5
8.2	11196.8	15430.2	8541.51	6380.64	8748.42	3411.44	7424.19	37266.1
8.4	12180.9	10640.8	11119.6	8526.15	7991.51	3634.68	10369.6	35438.4
8.6	16880.8	10346.4	9825.35	8503.57	5781.6	4019.27	8633.76	34505
8.8	13277.9	14041.5	13518.5	9619.84	11111.8	4141.23	10902.2	29584.8
9	11734.1	10006.5	11690.9	7971.22	7679.88	4668.65	10339.7	36053
9.2	11895.7	8670.08	9744.78	11110.1	7328.88	2364.89	14359.2	29915.5
9.4	11577.8	10030.1	8264.66	9416.88	7705.01	4085.95	7146.92	32703.4
9.6	13468.1	6541.85	5588.28	10585.1	8513.27	5251.36	9752	30187.9
9.8	10566.3	6440.2	4911.14	7392.86	4697.93	6254.07	9903.57	35325.9
10	10958.9	11386.5	4500.36	7499.88	5090.53	1710.21	12281.4	37067.2
10.2	7378.41	8361.6	5390.36	7640.33	3757.65	1459.85	6717.44	38735.3
10.4	9002.63	8226.84	3988.69	8381.9	9153.93	3637.32	7574.23	38407.4
10.6	11706.7	9943.13	5200.06	9500.8	6783.14	4192.33	3785.16	31605.3
10.8	13022.6	11310.3	4747.21	9059.03	7080.65	4606.6	8681.93	38348.6
11	12094.6	12088	5867.96	9136.64	8825.62	4332.32	9220.85	33539.6
11.2	14501	17770.1	4580.71	8821.2	9329.51	5116.28	3162.59	33158.1
11.4	10935.4	14392.5	3644.15	9116.8	4517.71	3634.23	5292.69	27822
11.6	13306.1	14368.5	5778.26	11060.1	4920.42	5488.21	4287.91	30319.6
11.8	15412.8	16337.4	6034.69	10953.4	6914.98	6410.49	6467.21	32494.5
12	12647.7	21163	6253.1	11692.8	8664.1	4081.42	3409.47	35256.6
12.2	17438.5	15338	6701.91	7589.85	10436.5	9075.36	6095.52	35603.8
12.4	21662.1	13893.4	3487.33	8810.11	6652.66	4245.21	3887.21	32700.9
12.6	18999.4	14250.1	6364.15	7100.47	4465.24	4663.04	3562.36	35890.9
12.8	14743.7	8811.35	8068.64	7662.37	3429.57	1829.81	3980.54	33000.8
13	12968.6	7103.56	7181.83	5794.1	5656.37	3171.13	4924.73	29071.1
13.2	8921.66	10151.9	4860.48	8971.01	5720.51	7121.53	3537.39	24989.9
13.4	9280.87	4623.3	5541.97	8870.6	4894.58	3456.82	2498.04	21372.1
13.6	10475.3	4902.5	4995.7	6792.18	2152.79	4683.41	4120.14	24321.3
13.8	10957.9	7066.89	4351.24	7037.17	631.199	2786.98	5621.98	24247.5
14	12430.7	6925.28	3542.59	9178.33	3541.89	9221.32	3476.63	29456.3
14.2	18124.6	5474.95	4286.25	5287.86	5921.91	5065.84	5792.87	18255
14.4	18473.2	8511.46	8067.2	3327.42	2364.34	3973.3	6727.06	15984.7
14.6	20777.3	4003.03	3380.97	3462.69	4001.15	4311.14	9149.05	19889.2
14.8	20308.8	7719.29	7406.19	5245.68	4796.85	5093.44	6555.31	9765.27
15	21292.1	4277.61	8144.59	5135.59	6898.43	4476.39	8254.9	11892.7
15.2	19193.2	1908.84	9794.19	5025.56	3535.55	6535.99	8540.54	7833.37
15.4	21752.2	6579.93	6430.12	9344.82	7668.78	4752.24	9263.43	6205.32
15.6	17551.5	5817.45	8661.38	7759.59	3247.85	3608.4	6410.77	6103.92
15.8	17229.1	4449.92	10346.4	7254.6	4172.2	6815.7	7577.18	3466.07
16	20417.7	5616.23	8591.2	7225.93	4936.37	3035.15	8966.51	5487.93
16.2	19252.4	5516.27	6490.64	3324.42	1573.75	3227.59	3681.62	9528.47
16.4	22446.6	9636.08	5983.81	5763.81	3103.08	3151.1	6138.26	7100.39
16.6	18809.6	9318.88	9400.57	5227.25	2428.42	3220.32	5288.45	7493.65
16.8	19628.9	8302.98	8458.45	7111.59	3618.08	4427.92	9975.47	10664.4
17	15800.8	7488.03	5438.91	1158.72	3833.42	1942.55	7768.5	11061.6
17.2	14897.8	7055.1	7640.7	4425.17	9321.39	4233.08	7595.42	9858.04
17.4	20905	6683.78	5771.43	6676.78	5472.15	3542.91	3757.31	8305.58
17.6	17884.3	10810.5	7205.87	8160.62	7754.02	3363.03	5468.76	7427.36
17.8	19614.2	11743.2	7675.21	5355.77	10256.6	4149.3	10467.7	8429.43
18	15699.6	10760	10320.1	6988	3748.57	6751.59	9169.34	10656.2
18.2	16342.2	14920.1	9884.75	6794.14	3890.08	2642.77	10121.3	5010.75
18.4	21373.7	7864.25	8409.02	11793.5	5213.57	4136.81	4059.14	7160.77
18.6	19299.5	9705.3	5556.44	7426.08	6331.2	1854.8	5395.03	8341.98
18.8	25496.9	22987.3	4142.24	6465.62	8102.93	5403.97	5994.17	11710.5
19	19655.1	22141.7	7828.78	7152.23	6945.06	2565.34	4588.07	8438.46
19.2	18928.5	22994.9	7778.13	7181.55	7631.09	1414.28	10815.1	11164.3
19.4	20347.4	10444.2	9106.89	7693.27	6607.31	3057.15	9587.82	5780.3
19.6	18738.4	15612.9	7475.29	7362.95	9902.67	2760.7	8882.98	6955.39
19.8	15890	13941.6	8729.93	9904.73	9685.76	3244.2	9414.46	8912.67
20	16670.3	9731.26	6448.01	7017.71	8186.61	4672.73	6313.02	10118.3
20.2	14616.5	9630.98	2738.62	7012.5	4587.69	1554.53	7335.9	11866.6
20.4	18893.1	5204.36	8235.84	5713.01	8549.14	4286.13	3031.93	9406.31
20.6	17953.1	9598.53	8169.86	6072.19	7545.69	7669.06	2730.89	13130.7
20.8	15023.8	4336.73	8208.37	5724.4	6656.03	5619.98	5823.49	11623
21	18690.1	1741.92	9090.72	4278.71	6504.4	3960.93	3049.12	12547.3
21.2	22578.2	6269.72	6818.48	4688.57	10410.6	2889.31	9177.21	10891.7
21.4	22571	12485.2	7365.26	5121.73	9786.18	2694.73	6215.36	15221.9
21.6	27030.2	13240.8	7410.38	4252.13	7305.16	1963.32	8726.48	16038.2
21.8	27856.4	18514.8	3163.45	2786.77	5423.82	4510.56	4574.27	15891
22	20392.2	9323.75	5902.48	2985.86	7204.14	3768.59	5479.1	15620.7
22.2	14610.8	10151.8	6132.84	5556.17	11614.8	1636.09	4605.71	12913.9
22.4	8572.69	7315.1	3688.84	4244.39	8240.09	4699.61	3371.62	12770.8
22.6	14592.8	9974.86	5175.16	7994.23	7378.36	3841.45	8107.37	10281.6
22.8	11172.2	6372.11	1976.69	8667.84	11459.3	4297.08	3938.79	17325.6
23	10430.1	8631.58	3320.02	7635.13	6662.06	3371.35	6275.9	15038.9
23.2	7053.57	11145.8	5666.65	4881.86	6810.79	5783.98	10487.9	14575.7
23.4	9421.7	14925.6	6271.08	5570.23	11061.2	4189.57	3979.14	15631.9
23.6	9893.85	8770.96	6874.54	3936.92	5997.55	7534.26	5635.08	23494.1
23.8	8193.49	12802	6408.93	3431.47	5999.88	3265.4	8525.09	18132.6
24	11263.2	11544.6	4104.55	6172.2	8513.91	4056.5	8373.58	17624.3
24.2	12516.4	10152.8	4884.7	4662.11	6924.3	1957.82	7030.87	19070.4
24.4	10689.6	11304	2050.51	5141.32	6160.07	4158.19	4442.71	15408.6
24.6	12165.1	11625.7	2913.99	4748.38	5807.57	5451.15	3509.8	14063.3
24.8	10378.8	10907.1	688.444	3820.82	6682.27	3791.74	5639.87	17268.3
25	7539.05	7213.03	2740.3	5195.96	8565.38	1830.08	3779.95	16423.8
25.2	8226.8	8351.8	3949.53	5955.76	7502.85	3981.49	6841.5	17559.7
25.4	9639.51	1911.91	4753.96	5374.68	9863.2	2515.5	7155.76	11637.2
25.6	9475.41	7358.16	4076.27	2886.44	12861.6	6458.63	4000.6	11924.1
25.8	5045.3	8212.14	3258.19	3703.61	15129.7	4493.41	4712.73	15838.3
26	12551.5	6823.56	3293.65	3406.97	12015.4	4148.68	3822.13	17875.3
26.2	11014.6	2851.12	2901.66	4998.55	14603.6	3690.9	8446.19	12114.3
26.4	13226.1	4582.09	4711.04	3140.56	12268.4	2509.82	6718.01	11680
26.6	15849.5	2161.4	3432.21	5183.27	11659.2	2862.05	6735.12	15140
26.8	10054.2	3240.53	2870.8	2573.19	13730.3	6400.63	7058.32	17935.8
27	4450.36	3299.82	5163.52	3053.73	17075	6243.34	7078.54	18470.6
27.2	4068.83	6256.18	5371.07	3669.05	6897.13	5540.6	2965.04	15663
27.4	8060.07	4624.51	4426.56	3228.73	7097.11	5773.03	4854.27	17432.1
27.6	7458.39	7087.9	5091.45	1298.34	5949.34	1094.59	4552.69	14611
27.8	5885.62	12610.7	6439.23	5315.22	7160.91	3030.26	3468.36	15203.9
28	7889	15381.2	4460.91	5264.33	3843.8	2662.79	5410.45	8962.04
28.2	7912.23	13707.4	2148.49	7414.67	5118.07	4737.49	4343.99	15512.5
28.4	9094.54	6890.78	7281.32	7858.87	4769.64	6133.19	8157.12	19239.6
28.6	13005.2	6197.34	2511.98	5626.72	6733.13	3911.45	3710.63	14265.8
28.8	7226.86	5342.08	2675.78	11420.5	7541.12	2468.5	3182.7	12682.5
29	10124	8935.79	2203.68	7111.06	5069.88	3979.42	4448.53	9377.74
29.2	8216.5	11684.5	6168.43	7079.56	6309.4	2081.89	5178.34	16645.6
29.4	5553.54	7193.09	1204.11	6493.42	3648.13	4524.05	8574.05	12328
29.6	8747.33	7123.83	4621.13	7256.56	5593.46	3094.75	3368.17	9107.91
29.8	8102.92	10868.7	6761.28	3145.73	4302.16	4531.01	3365.02	9804.04
30	10348.5	12405.3	2259.71	6557.6	3087.12	5190.17	3435.93	9488.6
			Normalized Data
Time (s)	Axon-1	Axon-2	Axon-3	Axon-4	Axon-6	Axon-7	Axon-8	Axon-9
0	1.74323	2.35958	4.75531	2.83079	2.3232	2.91945	1.97316	1.43776
0.2	1.53273	1.86509	3.07163	2.43189	2.01783	0.979831	4.49582	1.74886
0.4	1.09571	3.13696	4.68131	2.22089	1.51408	1.38281	3.2554	1.62046
0.6	1.08143	4.30301	3.73554	2.56006	1.95816	3.65126	4.63491	1.46719
0.8	0.900359	3.96231	3.69159	2.50921	2.45326	1.7177	4.22675	1.24373
1	2.49614	5.44189	4.40172	4.2199	1.50436	2.67976	4.34906	1.58978
1.2	1.54338	2.64667	3.25062	2.77578	1.94412	2.09397	4.54316	1.21677
1.4	2.42841	3.22246	2.46932	3.6073	3.38482	1.63734	2.65649	1.62971
1.6	3.05958	4.90606	2.84779	2.29977	2.40475	4.31941	2.47337	0.917212
1.8	2.54393	4.86213	4.23137	4.09284	1.69192	3.28185	2.46535	0.97222
2	2.45016	3.89174	3.27004	2.89678	2.63602	1.71003	2.98281	0.702418
2.2	1.90315	2.826	3.73282	5.38712	2.80318	3.60747	3.9676	1.54936
2.4	2.05176	2.01026	1.84	3.39698	2.27093	2.37066	2.1378	1.9705
2.6	1.48641	2.66373	3.57849	4.95771	2.06275	1.53378	3.54067	1.44872
2.8	1.62749	3.77153	3.51166	5.07054	1.99296	2.61116	2.67116	0.691611
3	1.37833	2.704	3.08537	2.96741	1.5005	2.40688	2.24342	1.44015
3.2	1.51004	2.04705	6.03444	2.82111	1.88649	3.77999	2.85193	0.75288
3.4	0.987215	2.93512	7.8843	5.62569	2.54552	4.25608	2.18738	2.19621
3.6	1.03665	3.4348	8.53549	4.71709	1.68654	3.07986	2.98004	1.20822
3.8	0.739521	3.28953	9.61167	4.5798	2.2425	0.473696	2.73835	1.3181
4	1.42203	3.05051	8.01883	4.63421	2.02287	4.06615	1.5072	1.17178
4.2	0.962052	3.47681	4.62349	3.57095	2.41296	2.22234	1.611	2.42715
4.4	1.15348	6.57077	3.96001	4.76709	1.30891	2.53445	2.59502	4.1353
4.6	2.04002	8.93457	4.2809	5.64153	1.83635	3.1164	3.52161	5.14146
4.8	1.77212	11.5897	4.19905	4.23961	2.30723	3.82225	2.68856	5.62907
5	2.09467	7.14473	4.06653	4.70153	2.69014	4.82198	2.55022	7.41055
5.2	2.03039	8.97778	1.93354	2.5252	3.51508	4.09376	1.08587	10.6209
5.4	1.62218	8.02714	3.47969	3.69662	3.6173	2.97764	2.09059	10.1713
5.6	2.63104	8.4265	1.90859	4.65097	2.02563	2.36777	1.34492	10.2143
5.8	2.84399	9.6032	0.691652	3.13349	2.86317	1.66589	2.61799	10.8304
6	1.92713	10.4183	2.39358	3.42175	4.15367	2.45343	4.12581	10.962
6.2	3.12335	9.77454	3.66293	3.27847	2.41177	1.34754	2.36911	10.0796
6.4	1.93533	5.01686	5.10178	3.31703	3.47095	4.1335	3.40305	11.9931
6.6	2.07871	3.64565	4.75722	3.764	3.38963	3.1167	4.9894	11.1641
6.8	2.89331	3.53709	3.27342	4.88106	2.68125	3.56986	4.08953	13.1097
7	2.31405	4.55127	3.64304	1.58061	2.4148	4.30612	3.00579	12.4744
7.2	2.40563	3.61715	4.62936	5.20502	3.1607	2.52802	2.81938	13.4348
7.4	2.12979	5.30479	4.21684	3.61755	2.77399	4.95693	2.38341	13.2317
7.6	1.24499	4.75361	4.44769	2.9945	2.66233	3.84273	2.24069	10.7563
7.8	2.45438	3.62777	4.91971	4.83867	3.01971	3.50019	2.94149	10.7232
8	2.21028	3.68542	5.0242	3.10321	3.35011	4.31399	3.40482	11.1861
8.2	2.68588	5.1896	4.48702	2.42997	3.45321	2.32698	2.41944	12.0758
8.4	2.92195	3.57881	5.84136	3.24706	3.15445	2.47925	3.3793	11.4836
8.6	4.04938	3.47977	5.16145	3.23846	2.28214	2.74159	2.81362	11.1811
8.8	3.1851	4.72256	7.10155	3.66358	4.38609	2.82478	3.55288	9.58674
9	2.81479	3.36547	6.14144	3.03572	3.03144	3.18454	3.36958	11.6827
9.2	2.85355	2.91599	5.11913	4.23114	2.89289	1.61312	4.67947	9.69389
9.4	2.77728	3.37341	4.34159	3.58628	3.04135	2.78707	2.32909	10.5973
9.6	3.23074	2.20021	2.93563	4.03119	3.3604	3.58201	3.17805	9.78217
9.8	2.53464	2.16602	2.57992	2.81546	1.85439	4.26597	3.22744	11.4471
10	2.62881	3.82961	2.36413	2.85622	2.00936	1.16655	4.00235	12.0114
10.2	1.76993	2.81224	2.83166	2.90971	1.48323	0.995782	2.18912	12.5519
10.4	2.15955	2.76691	2.09534	3.19213	3.61328	2.48105	2.46834	12.4456
10.6	2.8082	3.34415	2.73169	3.61824	2.67747	2.85963	1.23353	10.2415
10.8	3.12386	3.80396	2.49381	3.45	2.79491	3.14221	2.82932	12.4266
11	2.90126	4.06552	3.08255	3.47955	3.48369	2.95512	3.00495	10.8683
11.2	3.47849	5.97657	2.40634	3.35943	3.68259	3.48987	1.03064	10.7446
11.4	2.62319	4.8406	1.91435	3.472	1.78325	2.47895	1.72482	9.01552
11.6	3.19188	4.83252	3.03544	4.21208	1.94221	3.74357	1.39737	9.82486
11.8	3.69724	5.49471	3.17014	4.17146	2.72951	4.37266	2.10758	10.5296
12	3.03394	7.1177	3.28488	4.45305	3.41993	2.78398	1.1111	11.4246
12.2	4.18316	5.1586	3.52065	2.89048	4.11955	6.1904	1.98645	11.5372
12.4	5.1963	4.67274	1.83197	3.3552	2.62597	2.89571	1.26679	10.5965
12.6	4.55759	4.79271	3.34321	2.70411	1.76254	3.18071	1.16092	11.6302
12.8	3.53672	2.9635	4.23862	2.9181	1.35373	1.24813	1.2972	10.6937
13	3.11092	2.38912	3.77276	2.2066	2.23271	2.16306	1.6049	9.42029
13.2	2.14013	3.41436	2.55331	3.41648	2.25802	4.85768	1.15279	8.09779
13.4	2.2263	1.55495	2.91131	3.37824	1.93201	2.35793	0.814078	6.92548
13.6	2.51283	1.64885	2.62434	2.5867	0.849757	3.1946	1.3427	7.88113
13.8	2.62857	2.37679	2.28579	2.68001	0.24915	1.90103	1.83213	7.85723
14	2.98188	2.32916	1.86099	3.49543	1.39807	6.28997	1.13299	9.54509
14.2	4.34772	1.84138	2.25165	2.0138	2.33752	3.45547	1.88782	5.91539
14.4	4.43134	2.86264	4.23786	1.2672	0.933261	2.71023	2.19226	5.17974
14.6	4.98407	1.34633	1.77609	1.31872	1.57935	2.94068	2.98155	6.44497
14.8	4.87167	2.59621	3.89062	1.99774	1.89343	3.47429	2.13629	3.16437
15	5.10755	1.43868	4.27851	1.95582	2.72298	3.05339	2.69016	3.85373
15.2	4.60406	0.641995	5.14508	1.91391	1.39557	4.45827	2.78325	2.53835
15.4	5.21793	2.21301	3.37787	3.55884	3.02706	3.24155	3.01883	2.01079
15.6	4.21025	1.95657	4.54999	2.95513	1.282	2.46133	2.08918	1.97793
15.8	4.13292	1.49663	5.43518	2.76281	1.64687	4.64906	2.4693	1.12315
16	4.89781	1.88889	4.51313	2.75189	1.94851	2.07031	2.92206	1.77832
16.2	4.61827	1.85527	3.40966	1.26606	0.621198	2.20157	1.19979	3.08763
16.4	5.38448	3.24088	3.14341	2.19506	1.22486	2.1494	2.00038	2.30083
16.6	4.51206	3.1342	4.9383	1.99072	0.958556	2.19661	1.72343	2.42826
16.8	4.70858	2.79252	4.44339	2.70834	1.42814	3.02033	3.25087	3.45572
17	3.7903	2.51843	2.85717	0.44128	1.51314	1.32503	2.53165	3.58444
17.2	3.5737	2.37282	4.01381	1.68526	3.67938	2.88743	2.47525	3.19443
17.4	5.01469	2.24794	3.03185	2.54275	2.15999	2.41665	1.22446	2.69136
17.6	4.29009	3.63586	3.78539	3.10785	3.0607	2.29396	1.78219	2.40678
17.8	4.70505	3.94957	4.03194	2.03967	4.04854	2.83029	3.41129	2.7315
18	3.76602	3.61888	5.42137	2.66128	1.47965	4.60533	2.98816	3.45307
18.2	3.92018	5.01803	5.19266	2.58745	1.53551	1.80266	3.2984	1.6237
18.4	5.12712	2.64496	4.41743	4.49137	2.05792	2.82176	1.32282	2.3204
18.6	4.62957	3.26416	2.91891	2.82811	2.49908	1.26518	1.75817	2.70316
18.8	6.11621	7.73126	2.176	2.46234	3.19842	3.68611	1.95342	3.79471
19	4.71487	7.44686	4.11262	2.72382	2.74138	1.74984	1.49519	2.73442
19.2	4.54057	7.73381	4.086	2.73499	3.01218	0.964695	3.5245	3.61773
19.4	4.88093	3.51267	4.78403	2.92987	2.60807	2.08531	3.12454	1.87306
19.6	4.49496	5.25103	3.92692	2.80407	3.90883	1.8831	2.89484	2.25384
19.8	3.81171	4.68894	4.58601	3.77207	3.82321	2.2129	3.06805	2.88809
20	3.99888	3.27289	3.38727	2.67259	3.23146	3.18732	2.05733	3.27876
20.2	3.50622	3.23916	1.43865	2.67061	1.81087	1.06036	2.39067	3.84529
20.4	4.53209	1.75037	4.32645	2.17572	3.37455	2.92361	0.988064	3.04805
20.6	4.30658	3.22825	4.29179	2.3125	2.97847	5.23115	0.889959	4.2549
20.8	3.60392	1.45856	4.31202	2.18005	2.6273	3.83345	1.8978	3.76634
21	4.48338	0.585857	4.77554	1.62948	2.56745	2.7018	0.993667	4.06587
21.2	5.41607	2.10868	3.58188	1.78557	4.10933	1.97083	2.99073	3.52938
21.4	5.41433	4.19911	3.86912	1.95054	3.86284	1.8381	2.0255	4.93256
21.6	6.48401	4.45326	3.89282	1.61936	2.88353	1.3392	2.84384	5.19705
21.8	6.68219	6.22703	1.66182	1.0613	2.14091	3.0767	1.49069	5.14937
22	4.89168	3.13583	3.10069	1.13712	2.84365	2.5706	1.78556	5.06179
22.2	3.50485	3.41433	3.2217	2.11599	4.58465	1.11599	1.50094	4.18465
22.4	2.05642	2.46027	1.93782	1.61641	3.25256	3.20565	1.09876	4.13829
22.6	3.50053	3.35482	2.71862	3.04449	2.91242	2.6203	2.64208	3.33169
22.8	2.67999	2.14312	1.03839	3.30102	4.52327	2.93108	1.2836	5.61424
23	2.50197	2.90304	1.74407	2.90773	2.62968	2.29963	2.04523	4.87324
23.2	1.69201	3.74865	2.9768	1.85919	2.68839	3.94532	3.41788	4.72317
23.4	2.26008	5.01988	3.29432	2.12134	4.36613	2.85775	1.29675	5.0654
23.6	2.37334	2.94992	3.61133	1.49932	2.36738	5.1392	1.8364	7.61311
23.8	1.96546	4.30566	3.36674	1.30683	2.3683	2.22736	2.77821	5.87575
24	2.70183	3.88276	2.1562	2.35059	3.36065	2.76698	2.72883	5.71104
24.2	3.00245	3.41466	2.56603	1.7755	2.73319	1.33545	2.29126	6.17963
24.4	2.56421	3.80186	1.07718	1.958	2.43153	2.83635	1.44782	4.99305
24.6	2.91817	3.91004	1.53078	1.80835	2.29239	3.71829	1.1438	4.55711
24.8	2.48967	3.66836	0.361653	1.45511	2.63765	2.58639	1.83796	5.59566
25	1.80847	2.42594	1.43954	1.9788	3.38097	1.24832	1.23184	5.32201
25.2	1.97345	2.80894	2.07477	2.26816	2.96156	2.71582	2.22955	5.69008
25.4	2.31233	0.643026	2.49735	2.04687	3.89325	1.71585	2.33197	3.77097
25.6	2.27296	2.47475	2.14135	1.09926	5.0768	4.4055	1.30374	3.86391
25.8	1.21027	2.76197	1.71159	1.41047	5.97206	3.065	1.53582	5.13229
26	3.01086	2.29495	1.73022	1.2975	4.74278	2.82986	1.24558	5.79236
26.2	2.64218	0.958909	1.5243	1.90363	5.7644	2.5176	2.7525	3.92555
26.4	3.17267	1.54108	2.4748	1.19604	4.84263	1.71197	2.18931	3.78481
26.6	3.80198	0.72694	1.80301	1.97397	4.60217	1.95224	2.19489	4.90601
26.8	2.41181	1.08988	1.50809	0.979963	5.41968	4.36594	2.30021	5.81198
27	1.06755	1.10982	2.7125	1.16297	6.73993	4.25865	2.3068	5.98525
27.2	0.976032	2.10413	2.82153	1.39731	2.72246	3.77931	0.966268	5.07548
27.4	1.93345	1.55535	2.32536	1.22961	2.8014	3.93784	1.58194	5.64873
27.6	1.78912	2.38386	2.67464	0.494452	2.34835	0.746633	1.48366	4.7346
27.8	1.41184	4.24132	3.38266	2.02422	2.82659	2.06697	1.13029	4.9267
28	1.89241	5.17314	2.34341	2.00485	1.51724	1.81632	1.76319	2.90409
28.2	1.89799	4.61018	1.12864	2.82377	2.02023	3.23149	1.41565	5.02671
28.4	2.1816	2.31756	3.82502	2.99294	1.8827	4.18352	2.65829	6.23444
28.6	3.11968	2.08434	1.3196	2.14285	2.65773	2.66804	1.20924	4.62272
28.8	1.73358	1.79669	1.40564	4.34934	2.97666	1.68379	1.0372	4.10967
29	2.42854	3.00535	1.15764	2.70814	2.00121	2.71441	1.44972	3.03879
29.2	1.97098	3.92982	3.2404	2.69615	2.49047	1.42008	1.68755	5.39389
29.4	1.33218	2.41923	0.632543	2.47293	1.44001	3.08591	2.79417	3.99479
29.6	2.09831	2.39594	2.42757	2.76356	2.20788	2.11096	1.09764	2.95135
29.8	1.94373	3.65545	3.55183	1.198	1.69817	3.09065	1.09661	3.17693
30	2.48239	4.17225	1.18707	2.49737	1.21856	3.54027	1.11972	3.07471
			Cumulative Value
	Axon1	Axon2	Axon3	Axon4	Axon6	Axon7	Axon8	Axon9
Summary	446.24	553.449	513.529	424.512	402.879	427.899	348.414	862.403

## Sheet: WT-Culture1-seq02
		Raw Data
Time (S)	Area1	Angle1	IntDen1	RawIntDen1	Length1	Area2	Angle2	IntDen2	RawIntDen2	Length2	Area3	Angle3	IntDen3	RawIntDen3	Length3	Area4	Angle4	IntDen4	RawIntDen4	Length4	Area5	IntDen5	RawIntDen5	Area6	Angle6	IntDen6	RawIntDen6	Length6	Area7	Angle7	IntDen7	RawIntDen7	Length7	Area8	Angle8	IntDen8	RawIntDen8	Length8	Area9	Angle9	IntDen9	RawIntDen9	Length9
0	7	-18.4349	14675	14675	6.22272	9	35.5377	22998.8	22998.8	8.04329	7	-120.964	24810.1	24810.1	6.28933	8	56.3099	27386.2	27386.2	7.13366	1371	1.69503e+06	1.69503e+06	7	9.46232	14328.2	14328.2	6.27744	6	-75.9638	15981.4	15981.4	4.56763	6	-26.5651	17096	17096	4.62256	6	-11.3099	14562.4	14562.4	5.19682
0.2	7	-18.4349	13378.5	13378.5	6.22272	9	35.5377	23863.1	23863.1	8.04329	7	-120.964	29621.5	29621.5	6.28933	8	56.3099	20015.7	20015.7	7.13366	1371	1.59105e+06	1.59105e+06	7	9.46232	15199.1	15199.1	6.27744	6	-75.9638	17837.3	17837.3	4.56763	6	-26.5651	19757.2	19757.2	4.62256	6	-11.3099	15218.1	15218.1	5.19682
0.4	7	-18.4349	13391	13391	6.22272	9	35.5377	26291.5	26291.5	8.04329	7	-120.964	32243	32243	6.28933	8	56.3099	27831.5	27831.5	7.13366	1371	1.68726e+06	1.68726e+06	7	9.46232	16401.7	16401.7	6.27744	6	-75.9638	18195	18195	4.56763	6	-26.5651	17326.9	17326.9	4.62256	6	-11.3099	23191.2	23191.2	5.19682
0.6	7	-18.4349	13459	13459	6.22272	9	35.5377	21554.1	21554.1	8.04329	7	-120.964	29858.2	29858.2	6.28933	8	56.3099	26236.9	26236.9	7.13366	1371	1.60826e+06	1.60826e+06	7	9.46232	15678.6	15678.6	6.27744	6	-75.9638	15299.9	15299.9	4.56763	6	-26.5651	14431.8	14431.8	4.62256	6	-11.3099	25640.7	25640.7	5.19682
0.8	7	-18.4349	13524.2	13524.2	6.22272	9	35.5377	23589.4	23589.4	8.04329	7	-120.964	29008.5	29008.5	6.28933	8	56.3099	26273.1	26273.1	7.13366	1371	1.62794e+06	1.62794e+06	7	9.46232	11136.5	11136.5	6.27744	6	-75.9638	14774.5	14774.5	4.56763	6	-26.5651	19819.1	19819.1	4.62256	6	-11.3099	39863.6	39863.6	5.19682
1	7	-18.4349	14744	14744	6.22272	9	35.5377	21621.5	21621.5	8.04329	7	-120.964	28251.2	28251.2	6.28933	8	56.3099	18906	18906	7.13366	1371	1.62341e+06	1.62341e+06	7	9.46232	13466.2	13466.2	6.27744	6	-75.9638	17636.4	17636.4	4.56763	6	-26.5651	20438.7	20438.7	4.62256	6	-11.3099	33726.6	33726.6	5.19682
1.2	7	-18.4349	13892.3	13892.3	6.22272	9	35.5377	27077.9	27077.9	8.04329	7	-120.964	25137.3	25137.3	6.28933	8	56.3099	25064.3	25064.3	7.13366	1371	1.68037e+06	1.68037e+06	7	9.46232	14543.7	14543.7	6.27744	6	-75.9638	16785.8	16785.8	4.56763	6	-26.5651	19224.5	19224.5	4.62256	6	-11.3099	44807.7	44807.7	5.19682
1.4	7	-18.4349	11805.9	11805.9	6.22272	9	35.5377	19376.1	19376.1	8.04329	7	-120.964	19047.7	19047.7	6.28933	8	56.3099	21557.3	21557.3	7.13366	1371	1.62326e+06	1.62326e+06	7	9.46232	12268.1	12268.1	6.27744	6	-75.9638	16855.3	16855.3	4.56763	6	-26.5651	18562.7	18562.7	4.62256	6	-11.3099	46390.8	46390.8	5.19682
1.6	7	-18.4349	14282.5	14282.5	6.22272	9	35.5377	16776.8	16776.8	8.04329	7	-120.964	19684.5	19684.5	6.28933	8	56.3099	25101.8	25101.8	7.13366	1371	1.57761e+06	1.57761e+06	7	9.46232	13142.3	13142.3	6.27744	6	-75.9638	15626.8	15626.8	4.56763	6	-26.5651	21746.2	21746.2	4.62256	6	-11.3099	41878.2	41878.2	5.19682
1.8	7	-18.4349	13105.6	13105.6	6.22272	9	35.5377	16022.5	16022.5	8.04329	7	-120.964	19179.7	19179.7	6.28933	8	56.3099	25979.9	25979.9	7.13366	1371	1603671	1603671	7	9.46232	14220.8	14220.8	6.27744	6	-75.9638	19337.3	19337.3	4.56763	6	-26.5651	19233.9	19233.9	4.62256	6	-11.3099	43748.9	43748.9	5.19682
2	7	-18.4349	16800.4	16800.4	6.22272	9	35.5377	16524.5	16524.5	8.04329	7	-120.964	24184.7	24184.7	6.28933	8	56.3099	25845.8	25845.8	7.13366	1371	1661436	1661436	7	9.46232	12754.5	12754.5	6.27744	6	-75.9638	17293.5	17293.5	4.56763	6	-26.5651	16733.8	16733.8	4.62256	6	-11.3099	46182.7	46182.7	5.19682
2.2	7	-18.4349	15367.9	15367.9	6.22272	9	35.5377	18495	18495	8.04329	7	-120.964	22238.4	22238.4	6.28933	8	56.3099	25410.7	25410.7	7.13366	1371	1.65613e+06	1.65613e+06	7	9.46232	13377.4	13377.4	6.27744	6	-75.9638	14498.9	14498.9	4.56763	6	-26.5651	15412.7	15412.7	4.62256	6	-11.3099	40867.8	40867.8	5.19682
2.4	7	-18.4349	12746.3	12746.3	6.22272	9	35.5377	19176	19176	8.04329	7	-120.964	21759.7	21759.7	6.28933	8	56.3099	25254.7	25254.7	7.13366	1371	1.58785e+06	1.58785e+06	7	9.46232	13542	13542	6.27744	6	-75.9638	20610.7	20610.7	4.56763	6	-26.5651	17675.9	17675.9	4.62256	6	-11.3099	38462.3	38462.3	5.19682
2.6	7	-18.4349	13853.1	13853.1	6.22272	9	35.5377	18862.1	18862.1	8.04329	7	-120.964	21329.6	21329.6	6.28933	8	56.3099	30974.3	30974.3	7.13366	1371	1.63392e+06	1.63392e+06	7	9.46232	11020.6	11020.6	6.27744	6	-75.9638	15717.7	15717.7	4.56763	6	-26.5651	19680.4	19680.4	4.62256	6	-11.3099	33325.4	33325.4	5.19682
2.8	7	-18.4349	12829.2	12829.2	6.22272	9	35.5377	25483.2	25483.2	8.04329	7	-120.964	25546.7	25546.7	6.28933	8	56.3099	25752.9	25752.9	7.13366	1371	1657222	1657222	7	9.46232	13806.2	13806.2	6.27744	6	-75.9638	15351.9	15351.9	4.56763	6	-26.5651	26056.8	26056.8	4.62256	6	-11.3099	25146.7	25146.7	5.19682
3	7	-18.4349	18390.7	18390.7	6.22272	9	35.5377	28085.1	28085.1	8.04329	7	-120.964	19506.1	19506.1	6.28933	8	56.3099	25200.1	25200.1	7.13366	1371	1.62391e+06	1.62391e+06	7	9.46232	16720.1	16720.1	6.27744	6	-75.9638	18224.1	18224.1	4.56763	6	-26.5651	23392.9	23392.9	4.62256	6	-11.3099	16114.5	16114.5	5.19682
3.2	7	-18.4349	12793.8	12793.8	6.22272	9	35.5377	23274.6	23274.6	8.04329	7	-120.964	20956.8	20956.8	6.28933	8	56.3099	22750.6	22750.6	7.13366	1371	1.61418e+06	1.61418e+06	7	9.46232	13590.5	13590.5	6.27744	6	-75.9638	12224.1	12224.1	4.56763	6	-26.5651	31868.8	31868.8	4.62256	6	-11.3099	23705.9	23705.9	5.19682
3.4	7	-18.4349	16084.7	16084.7	6.22272	9	35.5377	24096.4	24096.4	8.04329	7	-120.964	20106.9	20106.9	6.28933	8	56.3099	22493.2	22493.2	7.13366	1371	1.67006e+06	1.67006e+06	7	9.46232	15180.1	15180.1	6.27744	6	-75.9638	13165.1	13165.1	4.56763	6	-26.5651	24927.1	24927.1	4.62256	6	-11.3099	27101.7	27101.7	5.19682
3.6	7	-18.4349	14704.2	14704.2	6.22272	9	35.5377	19423.4	19423.4	8.04329	7	-120.964	21277.7	21277.7	6.28933	8	56.3099	21889.6	21889.6	7.13366	1371	1.65623e+06	1.65623e+06	7	9.46232	17246	17246	6.27744	6	-75.9638	16761	16761	4.56763	6	-26.5651	16715	16715	4.62256	6	-11.3099	32096.9	32096.9	5.19682
3.8	7	-18.4349	19196.6	19196.6	6.22272	9	35.5377	16991.8	16991.8	8.04329	7	-120.964	18290.3	18290.3	6.28933	8	56.3099	25472.4	25472.4	7.13366	1371	1.64261e+06	1.64261e+06	7	9.46232	11100.2	11100.2	6.27744	6	-75.9638	16631.3	16631.3	4.56763	6	-26.5651	14234.5	14234.5	4.62256	6	-11.3099	29165.6	29165.6	5.19682
4	7	-18.4349	13456	13456	6.22272	9	35.5377	17011.9	17011.9	8.04329	7	-120.964	17753.7	17753.7	6.28933	8	56.3099	25333.7	25333.7	7.13366	1371	1.61504e+06	1.61504e+06	7	9.46232	14605	14605	6.27744	6	-75.9638	16807.3	16807.3	4.56763	6	-26.5651	14526.3	14526.3	4.62256	6	-11.3099	35155.3	35155.3	5.19682
4.2	7	-18.4349	14197.7	14197.7	6.22272	9	35.5377	17791.5	17791.5	8.04329	7	-120.964	25500.9	25500.9	6.28933	8	56.3099	26262.3	26262.3	7.13366	1371	1.6283e+06	1.6283e+06	7	9.46232	14196.6	14196.6	6.27744	6	-75.9638	13494.1	13494.1	4.56763	6	-26.5651	25617.7	25617.7	4.62256	6	-11.3099	38700.7	38700.7	5.19682
4.4	7	-18.4349	16196.1	16196.1	6.22272	9	35.5377	20079.1	20079.1	8.04329	7	-120.964	21971.8	21971.8	6.28933	8	56.3099	26356	26356	7.13366	1371	1.63204e+06	1.63204e+06	7	9.46232	19543.1	19543.1	6.27744	6	-75.9638	17785.6	17785.6	4.56763	6	-26.5651	25672.2	25672.2	4.62256	6	-11.3099	33250	33250	5.19682
4.6	7	-18.4349	14535.5	14535.5	6.22272	9	35.5377	19429	19429	8.04329	7	-120.964	23772.2	23772.2	6.28933	8	56.3099	20181	20181	7.13366	1371	1.64619e+06	1.64619e+06	7	9.46232	14416.1	14416.1	6.27744	6	-75.9638	15517.9	15517.9	4.56763	6	-26.5651	27449.3	27449.3	4.62256	6	-11.3099	27765.5	27765.5	5.19682
4.8	7	-18.4349	21320.2	21320.2	6.22272	9	35.5377	19617	19617	8.04329	7	-120.964	19169.3	19169.3	6.28933	8	56.3099	25058.5	25058.5	7.13366	1371	1.64218e+06	1.64218e+06	7	9.46232	14555.2	14555.2	6.27744	6	-75.9638	20166.1	20166.1	4.56763	6	-26.5651	28033.9	28033.9	4.62256	6	-11.3099	31255.4	31255.4	5.19682
5	7	-18.4349	19889.3	19889.3	6.22272	9	35.5377	24182	24182	8.04329	7	-120.964	23976.7	23976.7	6.28933	8	56.3099	24019.5	24019.5	7.13366	1371	1.6132e+06	1.6132e+06	7	9.46232	16347.6	16347.6	6.27744	6	-75.9638	17448.4	17448.4	4.56763	6	-26.5651	25032.4	25032.4	4.62256	6	-11.3099	29336.9	29336.9	5.19682
5.2	7	-18.4349	18480.9	18480.9	6.22272	9	35.5377	23661.2	23661.2	8.04329	7	-120.964	27504.8	27504.8	6.28933	8	56.3099	22679.1	22679.1	7.13366	1371	1.68695e+06	1.68695e+06	7	9.46232	21690.9	21690.9	6.27744	6	-75.9638	18523	18523	4.56763	6	-26.5651	26354.2	26354.2	4.62256	6	-11.3099	25465.3	25465.3	5.19682
5.4	7	-18.4349	17968.6	17968.6	6.22272	9	35.5377	16024.1	16024.1	8.04329	7	-120.964	28152.6	28152.6	6.28933	8	56.3099	20679	20679	7.13366	1371	1.65092e+06	1.65092e+06	7	9.46232	12903.1	12903.1	6.27744	6	-75.9638	14198.1	14198.1	4.56763	6	-26.5651	32785.8	32785.8	4.62256	6	-11.3099	27741.8	27741.8	5.19682
5.6	7	-18.4349	19336.1	19336.1	6.22272	9	35.5377	25360.5	25360.5	8.04329	7	-120.964	29744.8	29744.8	6.28933	8	56.3099	22169.1	22169.1	7.13366	1371	1.6788e+06	1.6788e+06	7	9.46232	11855.6	11855.6	6.27744	6	-75.9638	16670.1	16670.1	4.56763	6	-26.5651	26635.6	26635.6	4.62256	6	-11.3099	25895.6	25895.6	5.19682
5.8	7	-18.4349	16094.7	16094.7	6.22272	9	35.5377	22537.7	22537.7	8.04329	7	-120.964	29399	29399	6.28933	8	56.3099	25794.4	25794.4	7.13366	1371	1.66391e+06	1.66391e+06	7	9.46232	15108.1	15108.1	6.27744	6	-75.9638	20271.9	20271.9	4.56763	6	-26.5651	25505.2	25505.2	4.62256	6	-11.3099	22405.4	22405.4	5.19682
6	7	-18.4349	19423.3	19423.3	6.22272	9	35.5377	35141	35141	8.04329	7	-120.964	26499.8	26499.8	6.28933	8	56.3099	21265.6	21265.6	7.13366	1371	1687738	1687738	7	9.46232	15211	15211	6.27744	6	-75.9638	18209.5	18209.5	4.56763	6	-26.5651	24487.1	24487.1	4.62256	6	-11.3099	23724.3	23724.3	5.19682
6.2	7	-18.4349	18820.9	18820.9	6.22272	9	35.5377	31005.6	31005.6	8.04329	7	-120.964	30230	30230	6.28933	8	56.3099	20993.3	20993.3	7.13366	1371	1.70704e+06	1.70704e+06	7	9.46232	15130.7	15130.7	6.27744	6	-75.9638	16092.3	16092.3	4.56763	6	-26.5651	24473.5	24473.5	4.62256	6	-11.3099	19241.3	19241.3	5.19682
6.4	7	-18.4349	15699	15699	6.22272	9	35.5377	37779.1	37779.1	8.04329	7	-120.964	23611.1	23611.1	6.28933	8	56.3099	17500.3	17500.3	7.13366	1371	1656682	1656682	7	9.46232	16864.6	16864.6	6.27744	6	-75.9638	13786.5	13786.5	4.56763	6	-26.5651	24788.8	24788.8	4.62256	6	-11.3099	24878.4	24878.4	5.19682
6.6	7	-18.4349	10828.5	10828.5	6.22272	9	35.5377	35948.9	35948.9	8.04329	7	-120.964	28667.9	28667.9	6.28933	8	56.3099	22372.4	22372.4	7.13366	1371	1.63234e+06	1.63234e+06	7	9.46232	17658.8	17658.8	6.27744	6	-75.9638	17575.9	17575.9	4.56763	6	-26.5651	25862.5	25862.5	4.62256	6	-11.3099	20330.6	20330.6	5.19682
6.8	7	-18.4349	15590.9	15590.9	6.22272	9	35.5377	38957.6	38957.6	8.04329	7	-120.964	33417.3	33417.3	6.28933	8	56.3099	20084.8	20084.8	7.13366	1371	1.68383e+06	1.68383e+06	7	9.46232	19100.4	19100.4	6.27744	6	-75.9638	17645.9	17645.9	4.56763	6	-26.5651	16464.1	16464.1	4.62256	6	-11.3099	21317.9	21317.9	5.19682
7	7	-18.4349	16059.9	16059.9	6.22272	9	35.5377	36207.4	36207.4	8.04329	7	-120.964	30993.6	30993.6	6.28933	8	56.3099	22224.5	22224.5	7.13366	1371	1.68309e+06	1.68309e+06	7	9.46232	18013.6	18013.6	6.27744	6	-75.9638	18158.3	18158.3	4.56763	6	-26.5651	15536.2	15536.2	4.62256	6	-11.3099	19614.8	19614.8	5.19682
7.2	7	-18.4349	12322.3	12322.3	6.22272	9	35.5377	40307.5	40307.5	8.04329	7	-120.964	30696.4	30696.4	6.28933	8	56.3099	21719.4	21719.4	7.13366	1371	1.68279e+06	1.68279e+06	7	9.46232	17654.9	17654.9	6.27744	6	-75.9638	18295.6	18295.6	4.56763	6	-26.5651	14266	14266	4.62256	6	-11.3099	18352.9	18352.9	5.19682
7.4	7	-18.4349	15756.5	15756.5	6.22272	9	35.5377	40712.1	40712.1	8.04329	7	-120.964	30860.7	30860.7	6.28933	8	56.3099	23515.6	23515.6	7.13366	1371	1650853	1650853	7	9.46232	15947.1	15947.1	6.27744	6	-75.9638	12168	12168	4.56763	6	-26.5651	15372.5	15372.5	4.62256	6	-11.3099	17627.1	17627.1	5.19682
7.6	7	-18.4349	15638.2	15638.2	6.22272	9	35.5377	41782.3	41782.3	8.04329	7	-120.964	36230	36230	6.28933	8	56.3099	22053.4	22053.4	7.13366	1371	1.74924e+06	1.74924e+06	7	9.46232	14688.8	14688.8	6.27744	6	-75.9638	16844.7	16844.7	4.56763	6	-26.5651	13416	13416	4.62256	6	-11.3099	18191.5	18191.5	5.19682
7.8	7	-18.4349	20091	20091	6.22272	9	35.5377	33555.8	33555.8	8.04329	7	-120.964	32932	32932	6.28933	8	56.3099	22798.5	22798.5	7.13366	1371	1.64722e+06	1.64722e+06	7	9.46232	19104.9	19104.9	6.27744	6	-75.9638	14734.7	14734.7	4.56763	6	-26.5651	13644.7	13644.7	4.62256	6	-11.3099	13783.6	13783.6	5.19682
8	7	-18.4349	13018.5	13018.5	6.22272	9	35.5377	28300.3	28300.3	8.04329	7	-120.964	33161.2	33161.2	6.28933	8	56.3099	20346.3	20346.3	7.13366	1371	1.66785e+06	1.66785e+06	7	9.46232	15247.6	15247.6	6.27744	6	-75.9638	17442.6	17442.6	4.56763	6	-26.5651	12353.4	12353.4	4.62256	6	-11.3099	15815	15815	5.19682
8.2	7	-18.4349	15412.5	15412.5	6.22272	9	35.5377	30011	30011	8.04329	7	-120.964	32754.4	32754.4	6.28933	8	56.3099	24192.9	24192.9	7.13366	1371	1.67272e+06	1.67272e+06	7	9.46232	13684	13684	6.27744	6	-75.9638	14630.8	14630.8	4.56763	6	-26.5651	14096.7	14096.7	4.62256	6	-11.3099	14735.2	14735.2	5.19682
8.4	7	-18.4349	11924.6	11924.6	6.22272	9	35.5377	29799.4	29799.4	8.04329	7	-120.964	35379.4	35379.4	6.28933	8	56.3099	27589.3	27589.3	7.13366	1371	1.70393e+06	1.70393e+06	7	9.46232	12270.7	12270.7	6.27744	6	-75.9638	17561.2	17561.2	4.56763	6	-26.5651	13969.4	13969.4	4.62256	6	-11.3099	15284.1	15284.1	5.19682
8.6	7	-18.4349	16871.2	16871.2	6.22272	9	35.5377	27769.7	27769.7	8.04329	7	-120.964	37583.8	37583.8	6.28933	8	56.3099	23758.8	23758.8	7.13366	1371	1.64915e+06	1.64915e+06	7	9.46232	10768.8	10768.8	6.27744	6	-75.9638	15957.5	15957.5	4.56763	6	-26.5651	11193.8	11193.8	4.62256	6	-11.3099	17026.4	17026.4	5.19682
8.8	7	-18.4349	11953.9	11953.9	6.22272	9	35.5377	23282.7	23282.7	8.04329	7	-120.964	33283.9	33283.9	6.28933	8	56.3099	20848	20848	7.13366	1371	1.71425e+06	1.71425e+06	7	9.46232	11127.5	11127.5	6.27744	6	-75.9638	14625.7	14625.7	4.56763	6	-26.5651	13708.9	13708.9	4.62256	6	-11.3099	13870	13870	5.19682
9	7	-18.4349	12737.1	12737.1	6.22272	9	35.5377	26657.9	26657.9	8.04329	7	-120.964	34053.3	34053.3	6.28933	8	56.3099	29848.2	29848.2	7.13366	1371	1.6985e+06	1.6985e+06	7	9.46232	12648.1	12648.1	6.27744	6	-75.9638	11640.2	11640.2	4.56763	6	-26.5651	15090.4	15090.4	4.62256	6	-11.3099	11169.8	11169.8	5.19682
9.2	7	-18.4349	13132.3	13132.3	6.22272	9	35.5377	33022.1	33022.1	8.04329	7	-120.964	29491.6	29491.6	6.28933	8	56.3099	25479.2	25479.2	7.13366	1371	1.70212e+06	1.70212e+06	7	9.46232	15825.6	15825.6	6.27744	6	-75.9638	14635.3	14635.3	4.56763	6	-26.5651	18008.1	18008.1	4.62256	6	-11.3099	12567.7	12567.7	5.19682
9.4	7	-18.4349	12922	12922	6.22272	9	35.5377	22062.1	22062.1	8.04329	7	-120.964	31015.2	31015.2	6.28933	8	56.3099	23163.6	23163.6	7.13366	1371	1.60905e+06	1.60905e+06	7	9.46232	15382	15382	6.27744	6	-75.9638	15873.5	15873.5	4.56763	6	-26.5651	13145.1	13145.1	4.62256	6	-11.3099	11702.1	11702.1	5.19682
9.6	7	-18.4349	14391.6	14391.6	6.22272	9	35.5377	23298.9	23298.9	8.04329	7	-120.964	40367.5	40367.5	6.28933	8	56.3099	23427.9	23427.9	7.13366	1371	1.70814e+06	1.70814e+06	7	9.46232	16427.2	16427.2	6.27744	6	-75.9638	16408.1	16408.1	4.56763	6	-26.5651	10337.9	10337.9	4.62256	6	-11.3099	10881.9	10881.9	5.19682
9.8	7	-18.4349	14089.1	14089.1	6.22272	9	35.5377	23140.5	23140.5	8.04329	7	-120.964	36668.1	36668.1	6.28933	8	56.3099	20720.9	20720.9	7.13366	1371	1.65397e+06	1.65397e+06	7	9.46232	11061.5	11061.5	6.27744	6	-75.9638	18064.6	18064.6	4.56763	6	-26.5651	12775.2	12775.2	4.62256	6	-11.3099	13585.3	13585.3	5.19682
10	7	-18.4349	16715.9	16715.9	6.22272	9	35.5377	23468.5	23468.5	8.04329	7	-120.964	43343.5	43343.5	6.28933	8	56.3099	24760.7	24760.7	7.13366	1371	1.71736e+06	1.71736e+06	7	9.46232	15772.2	15772.2	6.27744	6	-75.9638	17590.1	17590.1	4.56763	6	-26.5651	11439.2	11439.2	4.62256	6	-11.3099	10585	10585	5.19682
10.2	7	-18.4349	15261.9	15261.9	6.22272	9	35.5377	23154.9	23154.9	8.04329	7	-120.964	53066.4	53066.4	6.28933	8	56.3099	23254.4	23254.4	7.13366	1371	1667580	1667580	7	9.46232	10859	10859	6.27744	6	-75.9638	15363.8	15363.8	4.56763	6	-26.5651	10387.5	10387.5	4.62256	6	-11.3099	17649.4	17649.4	5.19682
10.4	7	-18.4349	19703.7	19703.7	6.22272	9	35.5377	23598.2	23598.2	8.04329	7	-120.964	56679.3	56679.3	6.28933	8	56.3099	32371.2	32371.2	7.13366	1371	1.68516e+06	1.68516e+06	7	9.46232	11619.6	11619.6	6.27744	6	-75.9638	12255.4	12255.4	4.56763	6	-26.5651	10910.3	10910.3	4.62256	6	-11.3099	10888.7	10888.7	5.19682
10.6	7	-18.4349	16903.8	16903.8	6.22272	9	35.5377	20575.3	20575.3	8.04329	7	-120.964	38386.2	38386.2	6.28933	8	56.3099	22243.2	22243.2	7.13366	1371	1.71775e+06	1.71775e+06	7	9.46232	13708.2	13708.2	6.27744	6	-75.9638	18008.7	18008.7	4.56763	6	-26.5651	12466.8	12466.8	4.62256	6	-11.3099	11969.1	11969.1	5.19682
10.8	7	-18.4349	15365.9	15365.9	6.22272	9	35.5377	22542.7	22542.7	8.04329	7	-120.964	34946.7	34946.7	6.28933	8	56.3099	26016.5	26016.5	7.13366	1371	1717681	1717681	7	9.46232	15767.1	15767.1	6.27744	6	-75.9638	18019.3	18019.3	4.56763	6	-26.5651	11729.1	11729.1	4.62256	6	-11.3099	11267.6	11267.6	5.19682
11	7	-18.4349	18840	18840	6.22272	9	35.5377	21063	21063	8.04329	7	-120.964	51255.9	51255.9	6.28933	8	56.3099	28487.4	28487.4	7.13366	1371	1.66057e+06	1.66057e+06	7	9.46232	16007.6	16007.6	6.27744	6	-75.9638	15922.2	15922.2	4.56763	6	-26.5651	8521.58	8521.58	4.62256	6	-11.3099	11499.8	11499.8	5.19682
11.2	7	-18.4349	28303.4	28303.4	6.22272	9	35.5377	25757.4	25757.4	8.04329	7	-120.964	46268.9	46268.9	6.28933	8	56.3099	28885.5	28885.5	7.13366	1371	1.71098e+06	1.71098e+06	7	9.46232	12270.7	12270.7	6.27744	6	-75.9638	15094.4	15094.4	4.56763	6	-26.5651	12564.2	12564.2	4.62256	6	-11.3099	12726.8	12726.8	5.19682
11.4	7	-18.4349	17725.7	17725.7	6.22272	9	35.5377	20322.4	20322.4	8.04329	7	-120.964	31037.3	31037.3	6.28933	8	56.3099	25878.7	25878.7	7.13366	1371	1.61672e+06	1.61672e+06	7	9.46232	10827.1	10827.1	6.27744	6	-75.9638	14891.9	14891.9	4.56763	6	-26.5651	10628.8	10628.8	4.62256	6	-11.3099	11693.5	11693.5	5.19682
11.6	7	-18.4349	18359.8	18359.8	6.22272	9	35.5377	25134.1	25134.1	8.04329	7	-120.964	34402.8	34402.8	6.28933	8	56.3099	28207.5	28207.5	7.13366	1371	1.73551e+06	1.73551e+06	7	9.46232	12186.4	12186.4	6.27744	6	-75.9638	17929.4	17929.4	4.56763	6	-26.5651	16929.8	16929.8	4.62256	6	-11.3099	12629.2	12629.2	5.19682
11.8	7	-18.4349	17327.1	17327.1	6.22272	9	35.5377	29016.8	29016.8	8.04329	7	-120.964	39769.1	39769.1	6.28933	8	56.3099	25797.4	25797.4	7.13366	1371	1.74397e+06	1.74397e+06	7	9.46232	13660.6	13660.6	6.27744	6	-75.9638	14674.2	14674.2	4.56763	6	-26.5651	27141.2	27141.2	4.62256	6	-11.3099	15976	15976	5.19682
12	7	-18.4349	20278.5	20278.5	6.22272	9	35.5377	24484.7	24484.7	8.04329	7	-120.964	34450.3	34450.3	6.28933	8	56.3099	25287.5	25287.5	7.13366	1371	1.64709e+06	1.64709e+06	7	9.46232	13505	13505	6.27744	6	-75.9638	15603.3	15603.3	4.56763	6	-26.5651	15863.6	15863.6	4.62256	6	-11.3099	16128.2	16128.2	5.19682
12.2	7	-18.4349	17739.9	17739.9	6.22272	9	35.5377	20840.5	20840.5	8.04329	7	-120.964	37160.1	37160.1	6.28933	8	56.3099	23891.2	23891.2	7.13366	1371	1.69002e+06	1.69002e+06	7	9.46232	18145.8	18145.8	6.27744	6	-75.9638	14624.8	14624.8	4.56763	6	-26.5651	13493.2	13493.2	4.62256	6	-11.3099	19837.7	19837.7	5.19682
12.4	7	-18.4349	15937.6	15937.6	6.22272	9	35.5377	23730.5	23730.5	8.04329	7	-120.964	33300.2	33300.2	6.28933	8	56.3099	23934.8	23934.8	7.13366	1371	1.72506e+06	1.72506e+06	7	9.46232	18714.5	18714.5	6.27744	6	-75.9638	18935.8	18935.8	4.56763	6	-26.5651	9199.06	9199.06	4.62256	6	-11.3099	16858.6	16858.6	5.19682
12.6	7	-18.4349	15107.4	15107.4	6.22272	9	35.5377	30813.4	30813.4	8.04329	7	-120.964	35070.2	35070.2	6.28933	8	56.3099	23386.5	23386.5	7.13366	1371	1.68966e+06	1.68966e+06	7	9.46232	16293.3	16293.3	6.27744	6	-75.9638	17500.9	17500.9	4.56763	6	-26.5651	13209.6	13209.6	4.62256	6	-11.3099	13387.6	13387.6	5.19682
12.8	7	-18.4349	18529.5	18529.5	6.22272	9	35.5377	29325.8	29325.8	8.04329	7	-120.964	36168.9	36168.9	6.28933	8	56.3099	21686	21686	7.13366	1371	1.63786e+06	1.63786e+06	7	9.46232	23003.4	23003.4	6.27744	6	-75.9638	19087.4	19087.4	4.56763	6	-26.5651	13155.1	13155.1	4.62256	6	-11.3099	11796.4	11796.4	5.19682
13	7	-18.4349	14817	14817	6.22272	9	35.5377	32947.6	32947.6	8.04329	7	-120.964	37639.2	37639.2	6.28933	8	56.3099	20967.6	20967.6	7.13366	1371	1.64239e+06	1.64239e+06	7	9.46232	22587.8	22587.8	6.27744	6	-75.9638	19797.7	19797.7	4.56763	6	-26.5651	11476.5	11476.5	4.62256	6	-11.3099	11242.7	11242.7	5.19682
13.2	7	-18.4349	16999.8	16999.8	6.22272	9	35.5377	29547.2	29547.2	8.04329	7	-120.964	46044.8	46044.8	6.28933	8	56.3099	25012.2	25012.2	7.13366	1371	1.76422e+06	1.76422e+06	7	9.46232	22497	22497	6.27744	6	-75.9638	18572.1	18572.1	4.56763	6	-26.5651	13991	13991	4.62256	6	-11.3099	14485.6	14485.6	5.19682
13.4	7	-18.4349	15664.8	15664.8	6.22272	9	35.5377	28203.2	28203.2	8.04329	7	-120.964	37017.7	37017.7	6.28933	8	56.3099	20440.7	20440.7	7.13366	1371	1.74448e+06	1.74448e+06	7	9.46232	22209.7	22209.7	6.27744	6	-75.9638	16604.3	16604.3	4.56763	6	-26.5651	14431.4	14431.4	4.62256	6	-11.3099	15654	15654	5.19682
13.6	7	-18.4349	15501.3	15501.3	6.22272	9	35.5377	29169.2	29169.2	8.04329	7	-120.964	29470.6	29470.6	6.28933	8	56.3099	23370.4	23370.4	7.13366	1371	1689839	1689839	7	9.46232	21440.1	21440.1	6.27744	6	-75.9638	16340.1	16340.1	4.56763	6	-26.5651	13506.3	13506.3	4.62256	6	-11.3099	11060.5	11060.5	5.19682
13.8	7	-18.4349	16996.5	16996.5	6.22272	9	35.5377	29809.8	29809.8	8.04329	7	-120.964	34052.2	34052.2	6.28933	8	56.3099	27128.9	27128.9	7.13366	1371	1628014	1628014	7	9.46232	17696.6	17696.6	6.27744	6	-75.9638	13890.6	13890.6	4.56763	6	-26.5651	12899.1	12899.1	4.62256	6	-11.3099	14431.4	14431.4	5.19682
14	7	-18.4349	19951.7	19951.7	6.22272	9	35.5377	26203.4	26203.4	8.04329	7	-120.964	33616.4	33616.4	6.28933	8	56.3099	24731.1	24731.1	7.13366	1371	1.73735e+06	1.73735e+06	7	9.46232	23497.7	23497.7	6.27744	6	-75.9638	19339	19339	4.56763	6	-26.5651	12709.5	12709.5	4.62256	6	-11.3099	12754	12754	5.19682
14.2	7	-18.4349	16222.1	16222.1	6.22272	9	35.5377	30741.9	30741.9	8.04329	7	-120.964	29299.8	29299.8	6.28933	8	56.3099	26746.8	26746.8	7.13366	1371	1.68824e+06	1.68824e+06	7	9.46232	18535.7	18535.7	6.27744	6	-75.9638	19298.6	19298.6	4.56763	6	-26.5651	9201.63	9201.63	4.62256	6	-11.3099	15720.5	15720.5	5.19682
14.4	7	-18.4349	17182.4	17182.4	6.22272	9	35.5377	30868.3	30868.3	8.04329	7	-120.964	27432.2	27432.2	6.28933	8	56.3099	32798.5	32798.5	7.13366	1371	1.71054e+06	1.71054e+06	7	9.46232	19185	19185	6.27744	6	-75.9638	15927.7	15927.7	4.56763	6	-26.5651	14915.8	14915.8	4.62256	6	-11.3099	13620.3	13620.3	5.19682
14.6	7	-18.4349	15801.3	15801.3	6.22272	9	35.5377	30406	30406	8.04329	7	-120.964	25801.7	25801.7	6.28933	8	56.3099	22194.8	22194.8	7.13366	1371	1.71259e+06	1.71259e+06	7	9.46232	16526.6	16526.6	6.27744	6	-75.9638	14936.2	14936.2	4.56763	6	-26.5651	10575.1	10575.1	4.62256	6	-11.3099	17401	17401	5.19682
14.8	7	-18.4349	16956.4	16956.4	6.22272	9	35.5377	36189.5	36189.5	8.04329	7	-120.964	30204.3	30204.3	6.28933	8	56.3099	28405.5	28405.5	7.13366	1371	1.73236e+06	1.73236e+06	7	9.46232	14333.2	14333.2	6.27744	6	-75.9638	16845.4	16845.4	4.56763	6	-26.5651	14553.9	14553.9	4.62256	6	-11.3099	17963.6	17963.6	5.19682
15	7	-18.4349	14242.7	14242.7	6.22272	9	35.5377	43679.7	43679.7	8.04329	7	-120.964	31422.4	31422.4	6.28933	8	56.3099	29051.3	29051.3	7.13366	1371	1680921	1680921	7	9.46232	16821.4	16821.4	6.27744	6	-75.9638	18866.3	18866.3	4.56763	6	-26.5651	10130	10130	4.62256	6	-11.3099	11497.3	11497.3	5.19682
15.2	7	-18.4349	13881.2	13881.2	6.22272	9	35.5377	34594.8	34594.8	8.04329	7	-120.964	25859.3	25859.3	6.28933	8	56.3099	33949.4	33949.4	7.13366	1371	1.66176e+06	1.66176e+06	7	9.46232	18139.2	18139.2	6.27744	6	-75.9638	13930.4	13930.4	4.56763	6	-26.5651	19469.6	19469.6	4.62256	6	-11.3099	12751.2	12751.2	5.19682
15.4	7	-18.4349	17493.1	17493.1	6.22272	9	35.5377	39752	39752	8.04329	7	-120.964	27900.7	27900.7	6.28933	8	56.3099	36707.3	36707.3	7.13366	1371	1.69442e+06	1.69442e+06	7	9.46232	15975.8	15975.8	6.27744	6	-75.9638	18579.1	18579.1	4.56763	6	-26.5651	15450.7	15450.7	4.62256	6	-11.3099	14715.3	14715.3	5.19682
15.6	7	-18.4349	17252	17252	6.22272	9	35.5377	41073.5	41073.5	8.04329	7	-120.964	27045.9	27045.9	6.28933	8	56.3099	37700.2	37700.2	7.13366	1371	1.7442e+06	1.7442e+06	7	9.46232	15802.9	15802.9	6.27744	6	-75.9638	17345.8	17345.8	4.56763	6	-26.5651	10800.1	10800.1	4.62256	6	-11.3099	16623	16623	5.19682
15.8	7	-18.4349	12857.4	12857.4	6.22272	9	35.5377	46613.5	46613.5	8.04329	7	-120.964	23914.1	23914.1	6.28933	8	56.3099	36095.8	36095.8	7.13366	1371	1.73072e+06	1.73072e+06	7	9.46232	15739.1	15739.1	6.27744	6	-75.9638	14120.9	14120.9	4.56763	6	-26.5651	15018.2	15018.2	4.62256	6	-11.3099	20457.4	20457.4	5.19682
16	7	-18.4349	15228	15228	6.22272	9	35.5377	44766	44766	8.04329	7	-120.964	22134.3	22134.3	6.28933	8	56.3099	30636.8	30636.8	7.13366	1371	1.66289e+06	1.66289e+06	7	9.46232	14263.7	14263.7	6.27744	6	-75.9638	16963.5	16963.5	4.56763	6	-26.5651	14374	14374	4.62256	6	-11.3099	13321.9	13321.9	5.19682
16.2	7	-18.4349	15726.9	15726.9	6.22272	9	35.5377	35323.6	35323.6	8.04329	7	-120.964	27255.8	27255.8	6.28933	8	56.3099	31319.8	31319.8	7.13366	1371	1.65289e+06	1.65289e+06	7	9.46232	23373	23373	6.27744	6	-75.9638	15814.4	15814.4	4.56763	6	-26.5651	11547.9	11547.9	4.62256	6	-11.3099	14511.6	14511.6	5.19682
16.4	7	-18.4349	16829	16829	6.22272	9	35.5377	35821.2	35821.2	8.04329	7	-120.964	22791.3	22791.3	6.28933	8	56.3099	27539	27539	7.13366	1371	1.73248e+06	1.73248e+06	7	9.46232	14176.1	14176.1	6.27744	6	-75.9638	11981.3	11981.3	4.56763	6	-26.5651	14339.7	14339.7	4.62256	6	-11.3099	15076.9	15076.9	5.19682
16.6	7	-18.4349	15967.1	15967.1	6.22272	9	35.5377	32737.3	32737.3	8.04329	7	-120.964	27881	27881	6.28933	8	56.3099	27820.2	27820.2	7.13366	1371	1.70278e+06	1.70278e+06	7	9.46232	16535.9	16535.9	6.27744	6	-75.9638	18263.9	18263.9	4.56763	6	-26.5651	14501.9	14501.9	4.62256	6	-11.3099	17771.8	17771.8	5.19682
16.8	7	-18.4349	17264.6	17264.6	6.22272	9	35.5377	32689.7	32689.7	8.04329	7	-120.964	33477.1	33477.1	6.28933	8	56.3099	26841.3	26841.3	7.13366	1371	1.66377e+06	1.66377e+06	7	9.46232	11364.8	11364.8	6.27744	6	-75.9638	14398.5	14398.5	4.56763	6	-26.5651	9165.87	9165.87	4.62256	6	-11.3099	12228.4	12228.4	5.19682
17	7	-18.4349	15217.2	15217.2	6.22272	9	35.5377	26960.2	26960.2	8.04329	7	-120.964	30580.6	30580.6	6.28933	8	56.3099	27495	27495	7.13366	1371	1.70689e+06	1.70689e+06	7	9.46232	17130.8	17130.8	6.27744	6	-75.9638	15125.8	15125.8	4.56763	6	-26.5651	12391.5	12391.5	4.62256	6	-11.3099	10061.1	10061.1	5.19682
17.2	7	-18.4349	13426.6	13426.6	6.22272	9	35.5377	29121.1	29121.1	8.04329	7	-120.964	30862.5	30862.5	6.28933	8	56.3099	32000.3	32000.3	7.13366	1371	1.73382e+06	1.73382e+06	7	9.46232	14459.7	14459.7	6.27744	6	-75.9638	22266.7	22266.7	4.56763	6	-26.5651	13246.1	13246.1	4.62256	6	-11.3099	13631.8	13631.8	5.19682
17.4	7	-18.4349	15436.1	15436.1	6.22272	9	35.5377	33151.6	33151.6	8.04329	7	-120.964	27138.4	27138.4	6.28933	8	56.3099	30903.9	30903.9	7.13366	1371	1.70731e+06	1.70731e+06	7	9.46232	13503.3	13503.3	6.27744	6	-75.9638	17373.9	17373.9	4.56763	6	-26.5651	15501.4	15501.4	4.62256	6	-11.3099	12210.3	12210.3	5.19682
17.6	7	-18.4349	17497.2	17497.2	6.22272	9	35.5377	31960.3	31960.3	8.04329	7	-120.964	29881.4	29881.4	6.28933	8	56.3099	29909.3	29909.3	7.13366	1371	1.69557e+06	1.69557e+06	7	9.46232	19545.9	19545.9	6.27744	6	-75.9638	17773.1	17773.1	4.56763	6	-26.5651	10421.5	10421.5	4.62256	6	-11.3099	9977.7	9977.7	5.19682
17.8	7	-18.4349	13123.1	13123.1	6.22272	9	35.5377	36891.2	36891.2	8.04329	7	-120.964	31617	31617	6.28933	8	56.3099	39834.6	39834.6	7.13366	1371	1.69677e+06	1.69677e+06	7	9.46232	18635.5	18635.5	6.27744	6	-75.9638	13485.7	13485.7	4.56763	6	-26.5651	13140.1	13140.1	4.62256	6	-11.3099	16265.6	16265.6	5.19682
18	7	-18.4349	13347	13347	6.22272	9	35.5377	30525.1	30525.1	8.04329	7	-120.964	36303.4	36303.4	6.28933	8	56.3099	33775.9	33775.9	7.13366	1371	1.64619e+06	1.64619e+06	7	9.46232	13587.8	13587.8	6.27744	6	-75.9638	18319.7	18319.7	4.56763	6	-26.5651	11004.9	11004.9	4.62256	6	-11.3099	18754	18754	5.19682
18.2	7	-18.4349	12419.4	12419.4	6.22272	9	35.5377	30021.2	30021.2	8.04329	7	-120.964	35130.9	35130.9	6.28933	8	56.3099	40812.9	40812.9	7.13366	1371	1724172	1724172	7	9.46232	14026.6	14026.6	6.27744	6	-75.9638	17591.5	17591.5	4.56763	6	-26.5651	17447.1	17447.1	4.62256	6	-11.3099	15644	15644	5.19682
18.4	7	-18.4349	13520.1	13520.1	6.22272	9	35.5377	37675.8	37675.8	8.04329	7	-120.964	40327.1	40327.1	6.28933	8	56.3099	45799.5	45799.5	7.13366	1371	1.70988e+06	1.70988e+06	7	9.46232	19699.8	19699.8	6.27744	6	-75.9638	19493.7	19493.7	4.56763	6	-26.5651	15123.8	15123.8	4.62256	6	-11.3099	13539.9	13539.9	5.19682
18.6	7	-18.4349	10747.2	10747.2	6.22272	9	35.5377	41959.7	41959.7	8.04329	7	-120.964	34102.8	34102.8	6.28933	8	56.3099	55801.4	55801.4	7.13366	1371	1.68049e+06	1.68049e+06	7	9.46232	18948.2	18948.2	6.27744	6	-75.9638	17436	17436	4.56763	6	-26.5651	12563.6	12563.6	4.62256	6	-11.3099	12371.9	12371.9	5.19682
18.8	7	-18.4349	16006.1	16006.1	6.22272	9	35.5377	45105.6	45105.6	8.04329	7	-120.964	36106.2	36106.2	6.28933	8	56.3099	57264.2	57264.2	7.13366	1371	1.71181e+06	1.71181e+06	7	9.46232	15872.6	15872.6	6.27744	6	-75.9638	15230	15230	4.56763	6	-26.5651	9487.56	9487.56	4.62256	6	-11.3099	11542.5	11542.5	5.19682
19	7	-18.4349	14223.8	14223.8	6.22272	9	35.5377	53352.1	53352.1	8.04329	7	-120.964	37775.1	37775.1	6.28933	8	56.3099	60345.2	60345.2	7.13366	1371	1.78618e+06	1.78618e+06	7	9.46232	14915.8	14915.8	6.27744	6	-75.9638	18138.1	18138.1	4.56763	6	-26.5651	11469.8	11469.8	4.62256	6	-11.3099	12913.7	12913.7	5.19682
19.2	7	-18.4349	11050.8	11050.8	6.22272	9	35.5377	46609.7	46609.7	8.04329	7	-120.964	28144.6	28144.6	6.28933	8	56.3099	61020.2	61020.2	7.13366	1371	1702613	1702613	7	9.46232	16481.7	16481.7	6.27744	6	-75.9638	13131.7	13131.7	4.56763	6	-26.5651	13974.5	13974.5	4.62256	6	-11.3099	12786.6	12786.6	5.19682
19.4	7	-18.4349	15149.4	15149.4	6.22272	9	35.5377	47997.2	47997.2	8.04329	7	-120.964	23083.4	23083.4	6.28933	8	56.3099	55568.7	55568.7	7.13366	1371	1.69787e+06	1.69787e+06	7	9.46232	14190.4	14190.4	6.27744	6	-75.9638	16842.5	16842.5	4.56763	6	-26.5651	11012.6	11012.6	4.62256	6	-11.3099	20345	20345	5.19682
19.6	7	-18.4349	12625.3	12625.3	6.22272	9	35.5377	59349.4	59349.4	8.04329	7	-120.964	16907.3	16907.3	6.28933	8	56.3099	58496.7	58496.7	7.13366	1371	1.74725e+06	1.74725e+06	7	9.46232	14691.7	14691.7	6.27744	6	-75.9638	18886.9	18886.9	4.56763	6	-26.5651	12119.1	12119.1	4.62256	6	-11.3099	14832.4	14832.4	5.19682
19.8	7	-18.4349	12353.3	12353.3	6.22272	9	35.5377	51267	51267	8.04329	7	-120.964	18388.7	18388.7	6.28933	8	56.3099	44600.4	44600.4	7.13366	1371	1.66597e+06	1.66597e+06	7	9.46232	18285.5	18285.5	6.27744	6	-75.9638	14661.9	14661.9	4.56763	6	-26.5651	11807.3	11807.3	4.62256	6	-11.3099	13493.2	13493.2	5.19682
20	7	-18.4349	13523.6	13523.6	6.22272	9	35.5377	54069.2	54069.2	8.04329	7	-120.964	18087.3	18087.3	6.28933	8	56.3099	39290.1	39290.1	7.13366	1371	1.74267e+06	1.74267e+06	7	9.46232	13281.5	13281.5	6.27744	6	-75.9638	14528.7	14528.7	4.56763	6	-26.5651	12035.8	12035.8	4.62256	6	-11.3099	10932.1	10932.1	5.19682
20.2	7	-18.4349	12668.2	12668.2	6.22272	9	35.5377	59972.5	59972.5	8.04329	7	-120.964	14570.2	14570.2	6.28933	8	56.3099	37288.6	37288.6	7.13366	1371	1.68661e+06	1.68661e+06	7	9.46232	16583	16583	6.27744	6	-75.9638	17294.4	17294.4	4.56763	6	-26.5651	14049.6	14049.6	4.62256	6	-11.3099	17478.4	17478.4	5.19682
20.4	7	-18.4349	13149.6	13149.6	6.22272	9	35.5377	73930	73930	8.04329	7	-120.964	14640.5	14640.5	6.28933	8	56.3099	31342.1	31342.1	7.13366	1371	1.71025e+06	1.71025e+06	7	9.46232	15237.5	15237.5	6.27744	6	-75.9638	18406.6	18406.6	4.56763	6	-26.5651	16333.4	16333.4	4.62256	6	-11.3099	12705	12705	5.19682
20.6	7	-18.4349	15723.5	15723.5	6.22272	9	35.5377	70468.5	70468.5	8.04329	7	-120.964	17919.1	17919.1	6.28933	8	56.3099	25103	25103	7.13366	1371	1.68976e+06	1.68976e+06	7	9.46232	17828	17828	6.27744	6	-75.9638	17640.4	17640.4	4.56763	6	-26.5651	13605.2	13605.2	4.62256	6	-11.3099	8736.27	8736.27	5.19682
20.8	7	-18.4349	11981.9	11981.9	6.22272	9	35.5377	65486.2	65486.2	8.04329	7	-120.964	16777.3	16777.3	6.28933	8	56.3099	27168.2	27168.2	7.13366	1371	1.72349e+06	1.72349e+06	7	9.46232	19858.2	19858.2	6.27744	6	-75.9638	19458.9	19458.9	4.56763	6	-26.5651	13790.6	13790.6	4.62256	6	-11.3099	12394.7	12394.7	5.19682
21	7	-18.4349	11841.1	11841.1	6.22272	9	35.5377	68178.4	68178.4	8.04329	7	-120.964	16841.7	16841.7	6.28933	8	56.3099	29397.5	29397.5	7.13366	1371	1649261	1649261	7	9.46232	17298	17298	6.27744	6	-75.9638	17362.5	17362.5	4.56763	6	-26.5651	10551.2	10551.2	4.62256	6	-11.3099	12262.8	12262.8	5.19682
21.2	7	-18.4349	13012	13012	6.22272	9	35.5377	71235.6	71235.6	8.04329	7	-120.964	16086.8	16086.8	6.28933	8	56.3099	30118.7	30118.7	7.13366	1371	1.73877e+06	1.73877e+06	7	9.46232	13328.9	13328.9	6.27744	6	-75.9638	14193.8	14193.8	4.56763	6	-26.5651	12661.3	12661.3	4.62256	6	-11.3099	12082.8	12082.8	5.19682
21.4	7	-18.4349	14091.3	14091.3	6.22272	9	35.5377	75632.5	75632.5	8.04329	7	-120.964	19982.3	19982.3	6.28933	8	56.3099	29471.5	29471.5	7.13366	1371	1.73807e+06	1.73807e+06	7	9.46232	18242.4	18242.4	6.27744	6	-75.9638	11836.3	11836.3	4.56763	6	-26.5651	14864.2	14864.2	4.62256	6	-11.3099	14198.2	14198.2	5.19682
21.6	7	-18.4349	17531.6	17531.6	6.22272	9	35.5377	71752.9	71752.9	8.04329	7	-120.964	18595.9	18595.9	6.28933	8	56.3099	27700.3	27700.3	7.13366	1371	1.70818e+06	1.70818e+06	7	9.46232	18661.9	18661.9	6.27744	6	-75.9638	16887.6	16887.6	4.56763	6	-26.5651	17259.9	17259.9	4.62256	6	-11.3099	14005.1	14005.1	5.19682
21.8	7	-18.4349	13245	13245	6.22272	9	35.5377	66662.3	66662.3	8.04329	7	-120.964	19782.8	19782.8	6.28933	8	56.3099	30453.3	30453.3	7.13366	1371	1.69127e+06	1.69127e+06	7	9.46232	19899.4	19899.4	6.27744	6	-75.9638	14458.6	14458.6	4.56763	6	-26.5651	14914.4	14914.4	4.62256	6	-11.3099	12233.5	12233.5	5.19682
22	7	-18.4349	15162.2	15162.2	6.22272	9	35.5377	62692.7	62692.7	8.04329	7	-120.964	21109.5	21109.5	6.28933	8	56.3099	30683.6	30683.6	7.13366	1371	1.79876e+06	1.79876e+06	7	9.46232	17087.6	17087.6	6.27744	6	-75.9638	15424.6	15424.6	4.56763	6	-26.5651	15244.1	15244.1	4.62256	6	-11.3099	14229.1	14229.1	5.19682
22.2	7	-18.4349	15125.7	15125.7	6.22272	9	35.5377	58857.6	58857.6	8.04329	7	-120.964	18746.3	18746.3	6.28933	8	56.3099	31771.4	31771.4	7.13366	1371	1.73667e+06	1.73667e+06	7	9.46232	18708	18708	6.27744	6	-75.9638	17101.4	17101.4	4.56763	6	-26.5651	10679.3	10679.3	4.62256	6	-11.3099	14315.7	14315.7	5.19682
22.4	7	-18.4349	12557.9	12557.9	6.22272	9	35.5377	65816.5	65816.5	8.04329	7	-120.964	14881.5	14881.5	6.28933	8	56.3099	24039.1	24039.1	7.13366	1371	1.6935e+06	1.6935e+06	7	9.46232	16546.1	16546.1	6.27744	6	-75.9638	12734.4	12734.4	4.56763	6	-26.5651	13743.8	13743.8	4.62256	6	-11.3099	13657	13657	5.19682
22.6	7	-18.4349	13601.8	13601.8	6.22272	9	35.5377	55287	55287	8.04329	7	-120.964	17664.1	17664.1	6.28933	8	56.3099	28645.7	28645.7	7.13366	1371	1.69134e+06	1.69134e+06	7	9.46232	18548.4	18548.4	6.27744	6	-75.9638	15061.7	15061.7	4.56763	6	-26.5651	9446.58	9446.58	4.62256	6	-11.3099	13276.1	13276.1	5.19682
22.8	7	-18.4349	15975.5	15975.5	6.22272	9	35.5377	55762.3	55762.3	8.04329	7	-120.964	19290.3	19290.3	6.28933	8	56.3099	24881.1	24881.1	7.13366	1371	1.74181e+06	1.74181e+06	7	9.46232	17070.8	17070.8	6.27744	6	-75.9638	15967.3	15967.3	4.56763	6	-26.5651	14349.8	14349.8	4.62256	6	-11.3099	11054.8	11054.8	5.19682
23	7	-18.4349	15270.9	15270.9	6.22272	9	35.5377	50979.5	50979.5	8.04329	7	-120.964	20056	20056	6.28933	8	56.3099	23963.5	23963.5	7.13366	1371	1.70664e+06	1.70664e+06	7	9.46232	15480.4	15480.4	6.27744	6	-75.9638	19137	19137	4.56763	6	-26.5651	10868	10868	4.62256	6	-11.3099	10613.4	10613.4	5.19682
23.2	7	-18.4349	16190.3	16190.3	6.22272	9	35.5377	43026.2	43026.2	8.04329	7	-120.964	21682.6	21682.6	6.28933	8	56.3099	22840.9	22840.9	7.13366	1371	1.70235e+06	1.70235e+06	7	9.46232	15329.3	15329.3	6.27744	6	-75.9638	17122.4	17122.4	4.56763	6	-26.5651	10567.9	10567.9	4.62256	6	-11.3099	15758.2	15758.2	5.19682
23.4	7	-18.4349	13739	13739	6.22272	9	35.5377	44529.9	44529.9	8.04329	7	-120.964	23387.9	23387.9	6.28933	8	56.3099	26926	26926	7.13366	1371	1.75761e+06	1.75761e+06	7	9.46232	13692.9	13692.9	6.27744	6	-75.9638	14298.2	14298.2	4.56763	6	-26.5651	12265.6	12265.6	4.62256	6	-11.3099	25419.3	25419.3	5.19682
23.6	7	-18.4349	12947.9	12947.9	6.22272	9	35.5377	35030.3	35030.3	8.04329	7	-120.964	26642.8	26642.8	6.28933	8	56.3099	29565.9	29565.9	7.13366	1371	1769880	1769880	7	9.46232	12792.7	12792.7	6.27744	6	-75.9638	15896.7	15896.7	4.56763	6	-26.5651	12272.5	12272.5	4.62256	6	-11.3099	27601.6	27601.6	5.19682
23.8	7	-18.4349	13655.1	13655.1	6.22272	9	35.5377	35096.3	35096.3	8.04329	7	-120.964	20520.4	20520.4	6.28933	8	56.3099	28009.3	28009.3	7.13366	1371	1.77158e+06	1.77158e+06	7	9.46232	13715.9	13715.9	6.27744	6	-75.9638	19118.2	19118.2	4.56763	6	-26.5651	14136.2	14136.2	4.62256	6	-11.3099	26169.5	26169.5	5.19682
24	7	-18.4349	15168.3	15168.3	6.22272	9	35.5377	33227.1	33227.1	8.04329	7	-120.964	22657.5	22657.5	6.28933	8	56.3099	25312.4	25312.4	7.13366	1371	1.70522e+06	1.70522e+06	7	9.46232	12294.2	12294.2	6.27744	6	-75.9638	13293.5	13293.5	4.56763	6	-26.5651	13718.1	13718.1	4.62256	6	-11.3099	24306.3	24306.3	5.19682
24.2	7	-18.4349	14279.1	14279.1	6.22272	9	35.5377	28398.1	28398.1	8.04329	7	-120.964	24421.5	24421.5	6.28933	8	56.3099	31751.9	31751.9	7.13366	1371	1.71014e+06	1.71014e+06	7	9.46232	11164.7	11164.7	6.27744	6	-75.9638	18371.1	18371.1	4.56763	6	-26.5651	17871.1	17871.1	4.62256	6	-11.3099	21914.2	21914.2	5.19682
24.4	7	-18.4349	15167.1	15167.1	6.22272	9	35.5377	31828.3	31828.3	8.04329	7	-120.964	20607.1	20607.1	6.28933	8	56.3099	28143.1	28143.1	7.13366	1371	1.70891e+06	1.70891e+06	7	9.46232	9606.25	9606.25	6.27744	6	-75.9638	16426.1	16426.1	4.56763	6	-26.5651	16625.2	16625.2	4.62256	6	-11.3099	18530.1	18530.1	5.19682
24.6	7	-18.4349	18712.9	18712.9	6.22272	9	35.5377	38651.3	38651.3	8.04329	7	-120.964	20949	20949	6.28933	8	56.3099	23249	23249	7.13366	1371	1.72262e+06	1.72262e+06	7	9.46232	16473.7	16473.7	6.27744	6	-75.9638	14563.8	14563.8	4.56763	6	-26.5651	17358.9	17358.9	4.62256	6	-11.3099	20816	20816	5.19682
24.8	7	-18.4349	15967.7	15967.7	6.22272	9	35.5377	45522.9	45522.9	8.04329	7	-120.964	20072.6	20072.6	6.28933	8	56.3099	29880.2	29880.2	7.13366	1371	1.67214e+06	1.67214e+06	7	9.46232	12407.7	12407.7	6.27744	6	-75.9638	17765.7	17765.7	4.56763	6	-26.5651	17930.8	17930.8	4.62256	6	-11.3099	21875.6	21875.6	5.19682
25	7	-18.4349	13774.2	13774.2	6.22272	9	35.5377	54147.5	54147.5	8.04329	7	-120.964	20446	20446	6.28933	8	56.3099	28561.2	28561.2	7.13366	1371	1.69222e+06	1.69222e+06	7	9.46232	12400.1	12400.1	6.27744	6	-75.9638	16193.2	16193.2	4.56763	6	-26.5651	12443.4	12443.4	4.62256	6	-11.3099	14407.3	14407.3	5.19682
25.2	7	-18.4349	15445.4	15445.4	6.22272	9	35.5377	49551.7	49551.7	8.04329	7	-120.964	24624.1	24624.1	6.28933	8	56.3099	26961.9	26961.9	7.13366	1371	1.79502e+06	1.79502e+06	7	9.46232	15868.9	15868.9	6.27744	6	-75.9638	17499.8	17499.8	4.56763	6	-26.5651	12244.3	12244.3	4.62256	6	-11.3099	16956.9	16956.9	5.19682
25.4	7	-18.4349	15614	15614	6.22272	9	35.5377	60890.4	60890.4	8.04329	7	-120.964	31967.4	31967.4	6.28933	8	56.3099	28494.1	28494.1	7.13366	1371	1.65285e+06	1.65285e+06	7	9.46232	10171.3	10171.3	6.27744	6	-75.9638	15521.1	15521.1	4.56763	6	-26.5651	14183.6	14183.6	4.62256	6	-11.3099	25198.5	25198.5	5.19682
25.6	7	-18.4349	16492.1	16492.1	6.22272	9	35.5377	58001.6	58001.6	8.04329	7	-120.964	31650.7	31650.7	6.28933	8	56.3099	30015.7	30015.7	7.13366	1371	1690263	1690263	7	9.46232	11849.2	11849.2	6.27744	6	-75.9638	13934.4	13934.4	4.56763	6	-26.5651	17513.5	17513.5	4.62256	6	-11.3099	20678.4	20678.4	5.19682
25.8	7	-18.4349	12282.8	12282.8	6.22272	9	35.5377	61186.9	61186.9	8.04329	7	-120.964	28903.2	28903.2	6.28933	8	56.3099	33529.5	33529.5	7.13366	1371	1.74021e+06	1.74021e+06	7	9.46232	12029.2	12029.2	6.27744	6	-75.9638	18251.4	18251.4	4.56763	6	-26.5651	17873.1	17873.1	4.62256	6	-11.3099	20865.6	20865.6	5.19682
26	7	-18.4349	11682	11682	6.22272	9	35.5377	44858.4	44858.4	8.04329	7	-120.964	27561.4	27561.4	6.28933	8	56.3099	31340.4	31340.4	7.13366	1371	1.74424e+06	1.74424e+06	7	9.46232	14590.8	14590.8	6.27744	6	-75.9638	16252.9	16252.9	4.56763	6	-26.5651	16736.1	16736.1	4.62256	6	-11.3099	18231.3	18231.3	5.19682
26.2	7	-18.4349	11615.8	11615.8	6.22272	9	35.5377	30214.3	30214.3	8.04329	7	-120.964	24625	24625	6.28933	8	56.3099	29145.7	29145.7	7.13366	1371	1.70065e+06	1.70065e+06	7	9.46232	13420.2	13420.2	6.27744	6	-75.9638	12810.5	12810.5	4.56763	6	-26.5651	16640.1	16640.1	4.62256	6	-11.3099	13977.4	13977.4	5.19682
26.4	7	-18.4349	11534.1	11534.1	6.22272	9	35.5377	27261.4	27261.4	8.04329	7	-120.964	30952.6	30952.6	6.28933	8	56.3099	30991.7	30991.7	7.13366	1371	1697020	1697020	7	9.46232	16117.4	16117.4	6.27744	6	-75.9638	16148.8	16148.8	4.56763	6	-26.5651	13601.4	13601.4	4.62256	6	-11.3099	16939.1	16939.1	5.19682
26.6	7	-18.4349	13726	13726	6.22272	9	35.5377	27967	27967	8.04329	7	-120.964	26530.3	26530.3	6.28933	8	56.3099	32790.2	32790.2	7.13366	1371	1.76351e+06	1.76351e+06	7	9.46232	9286.56	9286.56	6.27744	6	-75.9638	14156.5	14156.5	4.56763	6	-26.5651	11811.9	11811.9	4.62256	6	-11.3099	19353.2	19353.2	5.19682
26.8	7	-18.4349	12002.4	12002.4	6.22272	9	35.5377	19002.7	19002.7	8.04329	7	-120.964	28924.6	28924.6	6.28933	8	56.3099	36619.3	36619.3	7.13366	1371	1.80125e+06	1.80125e+06	7	9.46232	13600.6	13600.6	6.27744	6	-75.9638	12992.9	12992.9	4.56763	6	-26.5651	12956.3	12956.3	4.62256	6	-11.3099	21561.6	21561.6	5.19682
27	7	-18.4349	14271.8	14271.8	6.22272	9	35.5377	20463.2	20463.2	8.04329	7	-120.964	30907.1	30907.1	6.28933	8	56.3099	42682.1	42682.1	7.13366	1371	1.81202e+06	1.81202e+06	7	9.46232	17692.8	17692.8	6.27744	6	-75.9638	17761.2	17761.2	4.56763	6	-26.5651	13250.1	13250.1	4.62256	6	-11.3099	19843	19843	5.19682
27.2	7	-18.4349	13767.7	13767.7	6.22272	9	35.5377	17698.2	17698.2	8.04329	7	-120.964	29854.9	29854.9	6.28933	8	56.3099	39773.8	39773.8	7.13366	1371	1.70319e+06	1.70319e+06	7	9.46232	11939.2	11939.2	6.27744	6	-75.9638	15846.6	15846.6	4.56763	6	-26.5651	11949.8	11949.8	4.62256	6	-11.3099	20619.5	20619.5	5.19682
27.4	7	-18.4349	12458.6	12458.6	6.22272	9	35.5377	11986.5	11986.5	8.04329	7	-120.964	29335.5	29335.5	6.28933	8	56.3099	31397.8	31397.8	7.13366	1371	1.70944e+06	1.70944e+06	7	9.46232	13777.9	13777.9	6.27744	6	-75.9638	15455.8	15455.8	4.56763	6	-26.5651	15012.9	15012.9	4.62256	6	-11.3099	20812.7	20812.7	5.19682
27.6	7	-18.4349	10651.4	10651.4	6.22272	9	35.5377	18070.1	18070.1	8.04329	7	-120.964	25496.7	25496.7	6.28933	8	56.3099	38003.7	38003.7	7.13366	1371	1.772e+06	1.772e+06	7	9.46232	12977.9	12977.9	6.27744	6	-75.9638	12456.4	12456.4	4.56763	6	-26.5651	13625	13625	4.62256	6	-11.3099	19392.5	19392.5	5.19682
27.8	7	-18.4349	10861.7	10861.7	6.22272	9	35.5377	16398.4	16398.4	8.04329	7	-120.964	21951	21951	6.28933	8	56.3099	38614.9	38614.9	7.13366	1371	1.75749e+06	1.75749e+06	7	9.46232	13946.6	13946.6	6.27744	6	-75.9638	16671.4	16671.4	4.56763	6	-26.5651	11359.4	11359.4	4.62256	6	-11.3099	22349.8	22349.8	5.19682
28	7	-18.4349	12655.2	12655.2	6.22272	9	35.5377	17570.1	17570.1	8.04329	7	-120.964	20827.5	20827.5	6.28933	8	56.3099	34005.8	34005.8	7.13366	1371	1.66328e+06	1.66328e+06	7	9.46232	9211.32	9211.32	6.27744	6	-75.9638	18486.9	18486.9	4.56763	6	-26.5651	12384.7	12384.7	4.62256	6	-11.3099	21305.3	21305.3	5.19682
28.2	7	-18.4349	10997.6	10997.6	6.22272	9	35.5377	16609.3	16609.3	8.04329	7	-120.964	19221.4	19221.4	6.28933	8	56.3099	33339.3	33339.3	7.13366	1371	1.69555e+06	1.69555e+06	7	9.46232	14598.8	14598.8	6.27744	6	-75.9638	15767.7	15767.7	4.56763	6	-26.5651	14326.7	14326.7	4.62256	6	-11.3099	18130	18130	5.19682
28.4	7	-18.4349	14833.6	14833.6	6.22272	9	35.5377	15521.9	15521.9	8.04329	7	-120.964	19228.1	19228.1	6.28933	8	56.3099	37276.6	37276.6	7.13366	1371	1.73792e+06	1.73792e+06	7	9.46232	10728.7	10728.7	6.27744	6	-75.9638	14428.8	14428.8	4.56763	6	-26.5651	17097.9	17097.9	4.62256	6	-11.3099	18480.3	18480.3	5.19682
28.6	7	-18.4349	12844.5	12844.5	6.22272	9	35.5377	13121.3	13121.3	8.04329	7	-120.964	26503.9	26503.9	6.28933	8	56.3099	33094.4	33094.4	7.13366	1371	1.78278e+06	1.78278e+06	7	9.46232	11013.4	11013.4	6.27744	6	-75.9638	14147.7	14147.7	4.56763	6	-26.5651	17979.1	17979.1	4.62256	6	-11.3099	20118.4	20118.4	5.19682
28.8	7	-18.4349	10132.1	10132.1	6.22272	9	35.5377	17936.8	17936.8	8.04329	7	-120.964	21757	21757	6.28933	8	56.3099	31105.9	31105.9	7.13366	1371	1.75427e+06	1.75427e+06	7	9.46232	15443.6	15443.6	6.27744	6	-75.9638	12523.3	12523.3	4.56763	6	-26.5651	21762.9	21762.9	4.62256	6	-11.3099	21349	21349	5.19682
29	7	-18.4349	15602.7	15602.7	6.22272	9	35.5377	20786.3	20786.3	8.04329	7	-120.964	23779.7	23779.7	6.28933	8	56.3099	28341.7	28341.7	7.13366	1371	1.71679e+06	1.71679e+06	7	9.46232	14005.5	14005.5	6.27744	6	-75.9638	16577.3	16577.3	4.56763	6	-26.5651	26074.4	26074.4	4.62256	6	-11.3099	19017.5	19017.5	5.19682
29.2	7	-18.4349	16188.4	16188.4	6.22272	9	35.5377	19065.5	19065.5	8.04329	7	-120.964	17740.9	17740.9	6.28933	8	56.3099	29705.5	29705.5	7.13366	1371	1734782	1734782	7	9.46232	13530.7	13530.7	6.27744	6	-75.9638	13091.2	13091.2	4.56763	6	-26.5651	17995.1	17995.1	4.62256	6	-11.3099	16911.6	16911.6	5.19682
29.4	7	-18.4349	11082	11082	6.22272	9	35.5377	19309.1	19309.1	8.04329	7	-120.964	19341.1	19341.1	6.28933	8	56.3099	33980.1	33980.1	7.13366	1371	1.83645e+06	1.83645e+06	7	9.46232	10593	10593	6.27744	6	-75.9638	16502.4	16502.4	4.56763	6	-26.5651	17957.2	17957.2	4.62256	6	-11.3099	12095.2	12095.2	5.19682
29.6	7	-18.4349	16221.7	16221.7	6.22272	9	35.5377	21742.6	21742.6	8.04329	7	-120.964	15417.6	15417.6	6.28933	8	56.3099	32532.5	32532.5	7.13366	1371	1753498	1753498	7	9.46232	14040.8	14040.8	6.27744	6	-75.9638	18929.3	18929.3	4.56763	6	-26.5651	14436.1	14436.1	4.62256	6	-11.3099	11145.3	11145.3	5.19682
29.8	7	-18.4349	12292.1	12292.1	6.22272	9	35.5377	19295	19295	8.04329	7	-120.964	18269.2	18269.2	6.28933	8	56.3099	29518.2	29518.2	7.13366	1371	1.71102e+06	1.71102e+06	7	9.46232	12831.2	12831.2	6.27744	6	-75.9638	14784.2	14784.2	4.56763	6	-26.5651	17057.3	17057.3	4.62256	6	-11.3099	14699	14699	5.19682
30	7	-18.4349	13504	13504	6.22272	9	35.5377	25292.5	25292.5	8.04329	7	-120.964	20937.5	20937.5	6.28933	8	56.3099	29627.6	29627.6	7.13366	1371	1773895	1773895	7	9.46232	15966.6	15966.6	6.27744	6	-75.9638	15271.8	15271.8	4.56763	6	-26.5651	28494.7	28494.7	4.62256	6	-11.3099	15451.5	15451.5	5.19682
		Background Value
Time (s)	Axon1	Axon2	Axon3	Axon4	Axon6	Axon7	Axon8	Axon9
0	8654.43	11127.1	8654.43	9890.78	8654.43	7418.08	7418.08	7418.08
0.2	8123.53	10444.5	8123.53	9284.03	8123.53	6963.03	6963.03	6963.03
0.4	8614.74	11076.1	8614.74	9845.42	8614.74	7384.06	7384.06	7384.06
0.6	8211.41	10557.5	8211.41	9384.47	8211.41	7038.35	7038.35	7038.35
0.8	8311.86	10686.7	8311.86	9499.27	8311.86	7124.45	7124.45	7124.45
1	8288.77	10657	8288.77	9472.88	8288.77	7104.66	7104.66	7104.66
1.2	8579.59	11030.9	8579.59	9805.25	8579.59	7353.94	7353.94	7353.94
1.4	8287.97	10656	8287.97	9471.97	8287.97	7103.98	7103.98	7103.98
1.6	8054.89	10356.3	8054.89	9205.59	8054.89	6904.19	6904.19	6904.19
1.8	8187.96	10527.4	8187.96	9357.67	8187.96	7018.25	7018.25	7018.25
2	8482.9	10906.6	8482.9	9694.74	8482.9	7271.05	7271.05	7271.05
2.2	8455.82	10871.8	8455.82	9663.79	8455.82	7247.84	7247.84	7247.84
2.4	8107.19	10423.5	8107.19	9265.36	8107.19	6949.02	6949.02	6949.02
2.6	8342.39	10725.9	8342.39	9534.16	8342.39	7150.62	7150.62	7150.62
2.8	8461.38	10878.9	8461.38	9670.15	8461.38	7252.61	7252.61	7252.61
3	8291.32	10660.3	8291.32	9475.79	8291.32	7106.84	7106.84	7106.84
3.2	8241.61	10596.4	8241.61	9418.98	8241.61	7064.23	7064.23	7064.23
3.4	8526.94	10963.2	8526.94	9745.07	8526.94	7308.81	7308.81	7308.81
3.6	8456.32	10872.4	8456.32	9664.37	8456.32	7248.28	7248.28	7248.28
3.8	8386.76	10783	8386.76	9584.87	8386.76	7188.65	7188.65	7188.65
4	8245.99	10602	8245.99	9423.99	8245.99	7067.99	7067.99	7067.99
4.2	8313.74	10689.1	8313.74	9501.41	8313.74	7126.06	7126.06	7126.06
4.4	8332.82	10713.6	8332.82	9523.22	8332.82	7142.42	7142.42	7142.42
4.6	8405.06	10806.5	8405.06	9605.78	8405.06	7204.34	7204.34	7204.34
4.8	8384.6	10780.2	8384.6	9582.4	8384.6	7186.8	7186.8	7186.8
5	8236.61	10589.9	8236.61	9413.27	8236.61	7059.95	7059.95	7059.95
5.2	8613.14	11074	8613.14	9843.59	8613.14	7382.69	7382.69	7382.69
5.4	8429.22	10837.6	8429.22	9633.4	8429.22	7225.05	7225.05	7225.05
5.6	8571.56	11020.6	8571.56	9796.07	8571.56	7347.05	7347.05	7347.05
5.8	8495.52	10922.8	8495.52	9709.16	8495.52	7281.87	7281.87	7281.87
6	8617.19	11079.2	8617.19	9848.22	8617.19	7386.16	7386.16	7386.16
6.2	8715.74	11205.9	8715.74	9960.84	8715.74	7470.63	7470.63	7470.63
6.4	8458.62	10875.4	8458.62	9667	8458.62	7250.25	7250.25	7250.25
6.6	8334.34	10715.6	8334.34	9524.96	8334.34	7143.72	7143.72	7143.72
6.8	8597.22	11053.6	8597.22	9825.39	8597.22	7369.04	7369.04	7369.04
7	8593.43	11048.7	8593.43	9821.07	8593.43	7365.8	7365.8	7365.8
7.2	8591.9	11046.7	8591.9	9819.32	8591.9	7364.49	7364.49	7364.49
7.4	8428.86	10837.1	8428.86	9632.99	8428.86	7224.74	7224.74	7224.74
7.6	8931.19	11483	8931.19	10207.1	8931.19	7655.3	7655.3	7655.3
7.8	8410.32	10813.3	8410.32	9611.8	8410.32	7208.85	7208.85	7208.85
8	8515.65	10948.7	8515.65	9732.18	8515.65	7299.13	7299.13	7299.13
8.2	8540.52	10980.7	8540.52	9760.59	8540.52	7320.44	7320.44	7320.44
8.4	8699.86	11185.5	8699.86	9942.7	8699.86	7457.03	7457.03	7457.03
8.6	8420.16	10825.9	8420.16	9623.04	8420.16	7217.28	7217.28	7217.28
8.8	8752.56	11253.3	8752.56	10002.9	8752.56	7502.2	7502.2	7502.2
9	8672.14	11149.9	8672.14	9911.01	8672.14	7433.26	7433.26	7433.26
9.2	8690.63	11173.7	8690.63	9932.15	8690.63	7449.12	7449.12	7449.12
9.4	8215.43	10562.7	8215.43	9389.07	8215.43	7041.8	7041.8	7041.8
9.6	8721.34	11213.2	8721.34	9967.25	8721.34	7475.44	7475.44	7475.44
9.8	8444.76	10857.5	8444.76	9651.15	8444.76	7238.37	7238.37	7238.37
10	8768.45	11273.7	8768.45	10021.1	8768.45	7515.82	7515.82	7515.82
10.2	8514.27	10946.9	8514.27	9730.59	8514.27	7297.94	7297.94	7297.94
10.4	8604.03	11062.3	8604.03	9833.18	8604.03	7374.89	7374.89	7374.89
10.6	8770.41	11276.2	8770.41	10023.3	8770.41	7517.49	7517.49	7517.49
10.8	8770.07	11275.8	8770.07	10022.9	8770.07	7517.2	7517.2	7517.2
11	8478.5	10900.9	8478.5	9689.71	8478.5	7267.28	7267.28	7267.28
11.2	8735.87	11231.8	8735.87	9983.85	8735.87	7487.89	7487.89	7487.89
11.4	8254.57	10613	8254.57	9433.79	8254.57	7075.34	7075.34	7075.34
11.6	8861.1	11392.8	8861.1	10127	8861.1	7595.22	7595.22	7595.22
11.8	8904.28	11448.4	8904.28	10176.3	8904.28	7632.24	7632.24	7632.24
12	8409.67	10812.4	8409.67	9611.05	8409.67	7208.29	7208.29	7208.29
12.2	8628.83	11094.2	8628.83	9861.52	8628.83	7396.14	7396.14	7396.14
12.4	8807.73	11324.2	8807.73	10066	8807.73	7549.48	7549.48	7549.48
12.6	8627	11091.9	8627	9859.43	8627	7394.57	7394.57	7394.57
12.8	8362.54	10751.8	8362.54	9557.18	8362.54	7167.89	7167.89	7167.89
13	8385.64	10781.5	8385.64	9583.59	8385.64	7187.69	7187.69	7187.69
13.2	9007.71	11581.3	9007.71	10294.5	9007.71	7720.89	7720.89	7720.89
13.4	8906.92	11451.8	8906.92	10179.3	8906.92	7634.5	7634.5	7634.5
13.6	8627.92	11093	8627.92	9860.48	8627.92	7395.36	7395.36	7395.36
13.8	8312.25	10687.2	8312.25	9499.72	8312.25	7124.79	7124.79	7124.79
14	8870.5	11404.9	8870.5	10137.7	8870.5	7603.29	7603.29	7603.29
14.2	8619.73	11082.5	8619.73	9851.12	8619.73	7388.34	7388.34	7388.34
14.4	8733.63	11228.9	8733.63	9981.29	8733.63	7485.97	7485.97	7485.97
14.6	8744.09	11242.4	8744.09	9993.25	8744.09	7494.94	7494.94	7494.94
14.8	8845	11372.1	8845	10108.6	8845	7581.43	7581.43	7581.43
15	8582.38	11034.5	8582.38	9808.44	8582.38	7356.33	7356.33	7356.33
15.2	8484.56	10908.7	8484.56	9696.64	8484.56	7272.48	7272.48	7272.48
15.4	8651.31	11123.1	8651.31	9887.21	8651.31	7415.41	7415.41	7415.41
15.6	8905.45	11449.9	8905.45	10177.7	8905.45	7633.24	7633.24	7633.24
15.8	8836.66	11361.4	8836.66	10099	8836.66	7574.28	7574.28	7574.28
16	8490.32	10916.1	8490.32	9703.22	8490.32	7277.41	7277.41	7277.41
16.2	8439.24	10850.5	8439.24	9644.85	8439.24	7233.64	7233.64	7233.64
16.4	8845.63	11373	8845.63	10109.3	8845.63	7581.97	7581.97	7581.97
16.6	8693.97	11178	8693.97	9935.97	8693.97	7451.98	7451.98	7451.98
16.8	8494.81	10921.9	8494.81	9708.35	8494.81	7281.26	7281.26	7281.26
17	8714.96	11205	8714.96	9959.96	8714.96	7469.97	7469.97	7469.97
17.2	8852.49	11381.8	8852.49	10117.1	8852.49	7587.85	7587.85	7587.85
17.4	8717.12	11207.7	8717.12	9962.42	8717.12	7471.82	7471.82	7471.82
17.6	8657.19	11130.7	8657.19	9893.93	8657.19	7420.45	7420.45	7420.45
17.8	8663.32	11138.5	8663.32	9900.93	8663.32	7425.7	7425.7	7425.7
18	8405.05	10806.5	8405.05	9605.77	8405.05	7204.33	7204.33	7204.33
18.2	8803.21	11318.4	8803.21	10060.8	8803.21	7545.61	7545.61	7545.61
18.4	8730.23	11224.6	8730.23	9977.4	8730.23	7483.05	7483.05	7483.05
18.6	8580.18	11031.7	8580.18	9805.92	8580.18	7354.44	7354.44	7354.44
18.8	8740.1	11237.3	8740.1	9988.68	8740.1	7491.51	7491.51	7491.51
19	9119.8	11725.5	9119.8	10422.6	9119.8	7816.97	7816.97	7816.97
19.2	8693.14	11176.9	8693.14	9935.01	8693.14	7451.26	7451.26	7451.26
19.4	8668.95	11145.8	8668.95	9907.37	8668.95	7430.52	7430.52	7430.52
19.6	8921.04	11469.9	8921.04	10195.5	8921.04	7646.6	7646.6	7646.6
19.8	8506.03	10936.3	8506.03	9721.18	8506.03	7290.88	7290.88	7290.88
20	8897.66	11439.9	8897.66	10168.8	8897.66	7626.57	7626.57	7626.57
20.2	8611.42	11071.8	8611.42	9841.63	8611.42	7381.22	7381.22	7381.22
20.4	8732.12	11227	8732.12	9979.57	8732.12	7484.68	7484.68	7484.68
20.6	8627.5	11092.5	8627.5	9860	8627.5	7395	7395	7395
20.8	8799.75	11314	8799.75	10056.9	8799.75	7542.64	7542.64	7542.64
21	8420.73	10826.7	8420.73	9623.7	8420.73	7217.77	7217.77	7217.77
21.2	8877.76	11414.3	8877.76	10146	8877.76	7609.51	7609.51	7609.51
21.4	8874.15	11409.6	8874.15	10141.9	8874.15	7606.41	7606.41	7606.41
21.6	8721.55	11213.4	8721.55	9967.49	8721.55	7475.62	7475.62	7475.62
21.8	8635.21	11102.4	8635.21	9868.81	8635.21	7401.61	7401.61	7401.61
22	9184.02	11808	9184.02	10496	9184.02	7872.02	7872.02	7872.02
22.2	8867	11400.4	8867	10133.7	8867	7600.29	7600.29	7600.29
22.4	8646.63	11117.1	8646.63	9881.86	8646.63	7411.4	7411.4	7411.4
22.6	8635.59	11102.9	8635.59	9869.25	8635.59	7401.94	7401.94	7401.94
22.8	8893.24	11434.2	8893.24	10163.7	8893.24	7622.78	7622.78	7622.78
23	8713.7	11203.3	8713.7	9958.51	8713.7	7468.88	7468.88	7468.88
23.2	8691.81	11175.2	8691.81	9933.5	8691.81	7450.12	7450.12	7450.12
23.4	8973.94	11537.9	8973.94	10255.9	8973.94	7691.95	7691.95	7691.95
23.6	9036.59	11618.5	9036.59	10327.5	9036.59	7745.65	7745.65	7745.65
23.8	9045.28	11629.7	9045.28	10337.5	9045.28	7753.1	7753.1	7753.1
24	8706.43	11194	8706.43	9950.21	8706.43	7462.66	7462.66	7462.66
24.2	8731.59	11226.3	8731.59	9978.96	8731.59	7484.22	7484.22	7484.22
24.4	8725.26	11218.2	8725.26	9971.73	8725.26	7478.8	7478.8	7478.8
24.6	8795.26	11308.2	8795.26	10051.7	8795.26	7538.8	7538.8	7538.8
24.8	8537.56	10976.9	8537.56	9757.21	8537.56	7317.91	7317.91	7317.91
25	8640.05	11108.6	8640.05	9874.34	8640.05	7405.76	7405.76	7405.76
25.2	9164.92	11783.5	9164.92	10474.2	9164.92	7855.65	7855.65	7855.65
25.4	8439.08	10850.2	8439.08	9644.66	8439.08	7233.49	7233.49	7233.49
25.6	8630.08	11095.8	8630.08	9862.95	8630.08	7397.21	7397.21	7397.21
25.8	8885.12	11423.7	8885.12	10154.4	8885.12	7615.82	7615.82	7615.82
26	8905.65	11450.1	8905.65	10177.9	8905.65	7633.41	7633.41	7633.41
26.2	8683.14	11164	8683.14	9923.59	8683.14	7442.69	7442.69	7442.69
26.4	8664.58	11140.2	8664.58	9902.38	8664.58	7426.78	7426.78	7426.78
26.6	9004.06	11576.6	9004.06	10290.4	9004.06	7717.76	7717.76	7717.76
26.8	9196.74	11824.4	9196.74	10510.6	9196.74	7882.92	7882.92	7882.92
27	9251.75	11895.1	9251.75	10573.4	9251.75	7930.08	7930.08	7930.08
27.2	8696.09	11180.7	8696.09	9938.39	8696.09	7453.79	7453.79	7453.79
27.4	8727.97	11221.7	8727.97	9974.83	8727.97	7481.12	7481.12	7481.12
27.6	9047.4	11632.4	9047.4	10339.9	9047.4	7754.92	7754.92	7754.92
27.8	8973.34	11537.1	8973.34	10255.2	8973.34	7691.43	7691.43	7691.43
28	8492.32	10918.7	8492.32	9705.51	8492.32	7279.14	7279.14	7279.14
28.2	8657.07	11130.5	8657.07	9893.79	8657.07	7420.35	7420.35	7420.35
28.4	8873.4	11408.7	8873.4	10141	8873.4	7605.77	7605.77	7605.77
28.6	9102.44	11703.1	9102.44	10402.8	9102.44	7802.09	7802.09	7802.09
28.8	8956.87	11516	8956.87	10236.4	8956.87	7677.31	7677.31	7677.31
29	8765.54	11270	8765.54	10017.8	8765.54	7513.32	7513.32	7513.32
29.2	8857.38	11388.1	8857.38	10122.7	8857.38	7592.04	7592.04	7592.04
29.4	9376.46	12055.4	9376.46	10716	9376.46	8036.96	8036.96	8036.96
29.6	8952.94	11510.9	8952.94	10231.9	8952.94	7673.95	7673.95	7673.95
29.8	8736.07	11232.1	8736.07	9984.08	8736.07	7488.06	7488.06	7488.06
30	9057.09	11644.8	9057.09	10351	9057.09	7763.22	7763.22	7763.22
		Background corrected value
Time (s)	Axon1	Axon2	Axon3	Axon4	Axon6	Axon7	Axon8	Axon9
0	6020.56	11871.7	16155.7	17495.4	5673.74	8563.29	9677.93	7144.37
0.2	5254.98	13418.6	21498	10731.7	7075.54	10874.2	12794.2	8255.05
0.4	4776.22	15215.4	23628.2	17986.1	7786.95	10810.9	9942.83	15807.1
0.6	5247.6	10996.6	21646.8	16852.4	7467.2	8261.57	7393.43	18602.3
0.8	5212.33	12902.7	20696.6	16773.8	2824.64	7650.04	12694.7	32739.1
1	6455.19	10964.5	19962.4	9433.09	5177.41	10531.7	13334.1	26621.9
1.2	5312.73	16047	16557.7	15259	5964.11	9431.84	11870.5	37453.7
1.4	3517.97	8720.15	10759.7	12085.4	3980.08	9751.32	11458.8	39286.8
1.6	6227.64	6420.52	11629.6	15896.2	5087.42	8722.58	14842	34974
1.8	4917.64	5495.1	10991.7	16622.2	6032.86	12319.1	12215.7	36730.7
2	8317.55	5617.93	15701.8	16151	4271.59	10022.4	9462.79	38911.7
2.2	6912.04	7623.21	13782.6	15746.9	4921.54	7251.08	8164.82	33620
2.4	4639.1	8752.44	13652.5	15989.3	5434.82	13661.7	10726.8	31513.3
2.6	5510.72	8136.13	12987.2	21440.2	2678.17	8567.12	12529.8	26174.8
2.8	4367.78	14604.3	17085.3	16082.8	5344.8	8099.32	18804.2	17894.1
3	10099.4	17424.8	11214.8	15724.3	8428.78	11117.3	16286.1	9007.63
3.2	4552.22	12678.2	12715.2	13331.6	5348.91	5159.88	24804.6	16641.6
3.4	7557.72	13133.2	11580	12748.1	6653.12	5856.27	17618.3	19792.9
3.6	6247.83	8551	12821.4	12225.2	8789.69	9512.68	9466.75	24848.7
3.8	10809.8	6208.84	9903.51	15887.6	2713.41	9442.64	7045.8	21976.9
4	5210.01	6409.92	9507.7	15909.7	6358.99	9739.27	7458.28	28087.3
4.2	5883.93	7102.38	17187.2	16760.9	5882.82	6368.03	18491.6	31574.7
4.4	7863.26	9365.51	13639	16832.8	11210.2	10643.2	18529.8	26107.6
4.6	6130.44	8622.49	15367.1	10575.2	6011.03	8313.58	20244.9	20561.2
4.8	12935.6	8836.79	10784.7	15476.1	6170.63	12979.3	20847.1	24068.6
5	11652.7	13592	15740.1	14606.2	8111	10388.5	17972.5	22277
5.2	9867.79	12587.2	18891.6	12835.5	13077.7	11140.3	18971.5	18082.6
5.4	9539.33	5186.48	19723.3	11045.6	4473.86	6973.05	25560.8	20516.8
5.6	10764.5	14339.9	21173.3	12373	3284	9323.09	19288.5	18548.5
5.8	7599.15	11614.9	20903.5	16085.2	6612.6	12990.1	18223.3	15123.5
6	10806.1	24061.7	17882.6	11417.4	6593.8	10823.4	17101	16338.1
6.2	10105.2	19799.6	21514.3	11032.4	6414.99	8621.66	17002.8	11770.7
6.4	7240.36	26903.8	15152.4	7833.31	8405.94	6536.28	17538.5	17628.1
6.6	2494.16	25233.3	20333.6	12847.4	9324.51	10432.2	18718.8	13186.8
6.8	6993.72	27904	24820.1	10259.4	10503.2	10276.8	9095.05	13948.8
7	7466.48	25158.7	22400.2	12403.4	9420.19	10792.5	8170.42	12249
7.2	3730.39	29260.8	22104.5	11900.1	9063.04	10931.1	6901.55	10988.4
7.4	7327.6	29875	22431.8	13882.6	7518.24	4943.29	8147.75	10402.4
7.6	6707.05	30299.3	27298.8	11846.3	5757.64	9189.42	5760.69	10536.2
7.8	11680.6	22742.5	24521.6	13186.7	10694.6	7525.87	6435.83	6574.75
8	4502.85	17351.6	24645.6	10614.1	6731.93	10143.4	5054.3	8515.87
8.2	6871.96	19030.3	24213.9	14432.3	5143.49	7310.36	6776.26	7414.78
8.4	3224.71	18613.9	26679.6	17646.6	3570.8	10104.2	6512.34	7827.03
8.6	8451.08	16943.7	29163.6	14135.8	2348.69	8740.19	3976.55	9809.16
8.8	3201.37	12029.4	24531.4	10845.1	2374.91	7123.49	6206.75	6367.79
9	4064.96	15508	25381.2	19937.1	3976.01	4206.92	7657.15	3736.58
9.2	4441.62	21848.5	20800.9	15547	7135.01	7186.16	10558.9	5118.58
9.4	4706.59	11499.4	22799.8	13774.6	7166.56	8831.7	6103.32	4660.29
9.6	5670.25	12085.7	31646.1	13460.7	7705.86	8932.69	2862.44	3406.45
9.8	5644.39	12283	28223.3	11069.8	2616.76	10826.3	5536.88	6346.95
10	7947.46	12194.8	34575.1	14739.6	7003.7	10074.3	3923.37	3069.19
10.2	6747.68	12208	44552.1	13523.8	2344.69	8065.83	3089.56	10351.4
10.4	11099.7	12535.9	48075.3	22538.1	3015.59	4880.49	3535.45	3513.81
10.6	8133.42	9299.05	29615.8	12219.9	4937.81	10491.2	4949.32	4451.64
10.8	6595.82	11266.9	26176.7	15993.5	6997.06	10502.1	4211.94	3750.44
11	10361.5	10162	42777.4	18797.7	7529.1	8654.92	1254.3	4232.53
11.2	19567.5	14525.6	37533	18901.6	3534.85	7606.54	5076.31	5238.9
11.4	9471.12	9709.42	22782.8	16444.9	2572.51	7816.57	3553.5	4618.2
11.6	9498.69	13741.3	25541.7	18080.5	3325.27	10334.2	9334.6	5033.93
11.8	8422.82	17568.5	30864.8	15621.1	4756.29	7041.98	19509	8343.77
12	11868.9	13672.2	26040.6	15676.4	5095.32	8395.03	8655.33	8919.88
12.2	9111.07	9746.3	28531.3	14029.7	9517	7228.64	6097.02	12441.6
12.4	7129.84	12406.3	24492.5	13868.9	9906.78	11386.3	1649.58	9309.11
12.6	6480.36	19721.6	26443.2	13527.1	7666.3	10106.4	5815.03	5993
12.8	10167	18574	27806.3	12128.8	14640.8	11919.5	5987.17	4628.52
13	6431.35	22166.1	29253.6	11384	14202.2	12610	4288.8	4055.03
13.2	7992.11	17965.9	37037.1	14717.7	13489.2	10851.2	6270.07	6764.72
13.4	6757.85	16751.5	28110.8	10261.4	13302.8	8969.8	6796.87	8019.54
13.6	6873.38	18076.2	20842.7	13509.9	12812.2	8944.75	6110.97	3665.12
13.8	8684.22	19122.6	25740	17629.2	9384.33	6765.76	5774.29	7306.63
14	11081.2	14798.5	24745.9	14593.4	14627.2	11735.8	5106.25	5150.76
14.2	7602.34	19659.4	20680	16895.7	9915.95	11910.2	1813.29	8332.13
14.4	8448.76	19639.4	18698.6	22817.3	10451.4	8441.71	7429.87	6134.33
14.6	7057.22	19163.6	17057.6	12201.5	7782.55	7441.3	3080.18	9906.02
14.8	8111.38	24817.4	21359.3	18296.9	5488.22	9264.01	6972.51	10382.1
15	5660.34	32645.2	22840	19242.8	8238.97	11510	2773.65	4140.98
15.2	5396.64	23686.1	17374.7	24252.8	9654.64	6657.93	12197.1	5478.77
15.4	8841.79	28628.9	19249.4	26820.1	7324.52	11163.7	8035.31	7299.87
15.6	8346.51	29623.7	18140.4	27522.5	6897.47	9712.58	3166.91	8989.74
15.8	4020.73	35252.1	15077.4	25996.8	6902.45	6546.65	7443.95	12883.1
16	6737.72	33849.9	13643.9	20933.6	5773.37	9686.06	7096.59	6044.44
16.2	7287.69	24473.2	18816.6	21674.9	14933.8	8580.81	4314.27	7277.97
16.4	7983.32	24448.2	13945.7	17429.7	5330.52	4399.35	6757.77	7494.92
16.6	7273.16	21559.3	19187	17884.2	7841.89	10811.9	7049.97	10319.8
16.8	8769.78	21767.8	24982.3	17133	2869.96	7117.25	1884.61	4947.17
17	6502.26	15755.2	21865.6	17535	8415.83	7655.86	4921.54	2591.14
17.2	4574.11	17739.3	22010	21883.2	5607.25	14678.8	5658.2	6043.98
17.4	6718.95	21943.9	18421.3	20941.5	4786.22	9902.05	8029.62	4738.49
17.6	8840.05	20829.6	21224.2	20015.4	10888.7	10352.6	3001.08	2557.25
17.8	4459.8	25752.7	22953.7	29933.6	9972.19	6060.01	5714.42	8839.91
18	4941.99	19718.7	27898.3	24170.1	5182.73	11115.3	3800.55	11549.7
18.2	3616.19	18702.8	26327.7	30752.1	5223.42	10045.9	9901.49	8098.34
18.4	4789.88	26451.2	31596.9	35822.1	10969.6	12010.6	7640.73	6056.87
18.6	2167.01	30928.1	25522.6	45995.5	10368	10081.6	5209.19	5017.46
18.8	7266.02	33868.4	27366.1	47275.6	7132.53	7738.46	1996.05	4050.98
19	5104.01	41626.6	28655.3	49922.6	5795.96	10321.1	3652.8	5096.71
19.2	2357.69	35432.8	19451.4	51085.2	7788.59	5680.44	6523.21	5335.35
19.4	6480.5	36851.4	14414.5	45661.4	5521.47	9411.93	3582.05	12914.5
19.6	3704.24	47879.5	7986.31	48301.2	5770.7	11240.3	4472.5	7185.77
19.8	3847.27	40330.7	9882.64	34879.3	9779.48	7371	4516.41	6202.3
20	4625.91	42629.4	9189.6	29121.4	4383.84	6902.11	4409.26	3305.57
20.2	4056.75	48900.6	5958.83	27446.9	7971.57	9913.18	6668.41	10097.2
20.4	4417.5	62702.9	5908.41	21362.6	6505.35	10922	8848.76	5220.32
20.6	7095.96	59376	9291.61	15243	9200.54	10245.4	6210.18	1341.27
20.8	3182.13	54172.2	7977.53	17111.4	11058.5	11916.2	6247.98	4852.02
21	3420.39	57351.7	8420.98	19773.8	8877.27	10144.7	3333.46	5045.07
21.2	4134.28	59821.4	7209.03	19972.7	4451.18	6584.32	5051.79	4473.29
21.4	5217.12	64222.9	11108.2	19329.6	9368.23	4229.93	7257.81	6591.78
21.6	8810.08	60539.5	9874.39	17732.8	9940.31	9412.03	9784.32	6529.48
21.8	4609.77	55559.9	11147.6	20584.5	11264.2	7057.02	7512.75	4831.87
22	5978.17	50884.7	11925.4	20187.6	7903.53	7552.61	7372.1	6357.08
22.2	6258.68	47457.2	9879.3	21637.7	9841	9501.1	3079	6715.4
22.4	3911.28	54699.4	6234.91	14157.2	7899.49	5323.02	6332.37	6245.65
22.6	4966.2	44184.1	9028.51	18776.4	9912.85	7659.73	2044.64	5874.18
22.8	7082.3	44328.1	10397	14717.4	8177.54	8344.53	6726.98	3432.01
23	6557.25	39776.2	11342.3	14005	6766.73	11668.1	3399.16	3144.48
23.2	7498.44	31851	12990.8	12907.4	6637.52	9672.32	3117.79	8308.04
23.4	4765.07	32992	14414	16670.1	4718.94	6606.25	4573.63	17727.3
23.6	3911.35	23411.8	17606.2	19238.3	3756.15	8151.02	4526.84	19855.9
23.8	4609.78	23466.7	11475.1	17671.8	4670.66	11365.1	6383.07	18416.4
24	6461.89	22033.1	13951	15362.2	3587.79	5830.86	6255.46	16843.7
24.2	5547.48	17171.7	15689.9	21773	2433.1	10886.8	10386.9	14430
24.4	6441.83	20610.1	11881.8	18171.4	880.988	8947.3	9146.41	11051.3
24.6	9917.63	27343.1	12153.7	13197.3	7678.45	7025.05	9820.13	13277.2
24.8	7430.19	34546	11535	20123	3870.12	10447.7	10612.9	14557.7
25	5134.16	43038.9	11806	18686.9	3760.01	8787.45	5037.69	7001.56
25.2	6280.47	37768.3	15459.1	16487.7	6703.98	9644.19	4388.7	9101.22
25.4	7174.9	50040.2	23528.3	18849.4	1732.19	8287.62	6950.09	17965
25.6	7862.02	46905.7	23020.7	20152.8	3219.15	6537.16	10116.2	13281.2
25.8	3397.64	49763.2	20018	23375.1	3144.06	10635.6	10257.3	13249.7
26	2776.39	33408.3	18655.7	21162.5	5685.2	8619.51	9102.68	10597.9
26.2	2932.68	19050.3	15941.9	19222.1	4737.04	5367.79	9197.41	6534.69
26.4	2869.56	16121.3	22288	21089.3	7452.8	8722.03	6174.62	9512.29
26.6	4721.91	16390.3	17526.2	22499.9	282.503	6438.78	4094.16	11635.4
26.8	2805.67	7178.3	19727.9	26108.8	4403.9	5109.94	5073.37	13678.7
27	5020.01	8568.1	21655.3	32108.7	8441	9831.14	5320	11913
27.2	5071.57	6517.5	21158.8	29835.4	3243.15	8392.8	4496	13165.8
27.4	3730.64	764.848	20607.5	21423	5049.88	7974.72	7531.83	13331.6
27.6	1604.03	6437.71	16449.3	27663.8	3930.5	4701.52	5870.06	11637.6
27.8	1888.4	4861.21	12977.6	28359.7	4973.23	8979.95	3667.96	14658.4
28	4162.85	6651.39	12335.1	24300.3	718.994	11207.7	5105.58	14026.2
28.2	2340.56	5478.79	10564.4	23445.5	5941.77	8347.37	6906.33	10709.7
28.4	5960.23	4113.24	10354.7	27135.6	1855.28	6822.99	9492.12	10874.5
28.6	3742.08	1418.17	17401.5	22691.6	1910.97	6345.59	10177	12316.3
28.8	1175.24	6420.82	12800.1	20869.5	6486.74	4846.02	14085.6	13671.7
29	6837.12	9516.37	15014.2	18323.9	5239.94	9064.02	18561.1	11504.2
29.2	7330.99	7677.41	8883.51	19582.8	4673.31	5499.18	10403.1	9319.6
29.4	1705.55	7253.63	9964.65	23264.2	1216.52	8465.42	9920.25	4058.19
29.6	7268.78	10231.7	6464.63	22300.6	5087.86	11255.3	6762.1	3471.31
29.8	3556.05	8062.93	9533.13	19534.1	4095.14	7296.14	9569.26	7210.92
30	4446.87	13647.7	11880.4	19276.7	6909.48	7508.59	20731.5	7688.28
		Normalized Data
Time (s)	Axon1	Axon2	Axon3	Axon4	Axon6	Axon7	Axon8	Axon9
0	2.82461	2.60604	2.18106	1.70469	3.62175	1.79147	4.3285	2.39483
0.2	2.46543	2.94561	2.90228	1.04566	4.51658	2.27493	5.72226	2.76714
0.4	2.24081	3.34004	3.18987	1.75249	4.97069	2.26168	4.44697	5.29863
0.6	2.46196	2.41394	2.92238	1.64203	4.76658	1.72835	3.30674	6.23559
0.8	2.44542	2.83237	2.7941	1.63437	1.80307	1.60042	5.67775	10.9743
1	3.02852	2.4069	2.69498	0.919124	3.30493	2.20328	5.96371	8.9238
1.2	2.49252	3.52259	2.23533	1.48678	3.80711	1.97317	5.30914	12.5547
1.4	1.65049	1.91422	1.45259	1.17755	2.54063	2.04001	5.12498	13.1691
1.6	2.92176	1.40941	1.57003	1.54886	3.24749	1.82479	6.63814	11.7235
1.8	2.30716	1.20627	1.48391	1.61961	3.851	2.5772	5.46351	12.3123
2	3.90226	1.23323	2.11978	1.57369	2.72671	2.09672	4.23228	13.0434
2.2	3.24285	1.67343	1.86069	1.53431	3.1416	1.51695	3.65175	11.2696
2.4	2.17648	1.92131	1.84312	1.55794	3.46925	2.85807	4.79763	10.5634
2.6	2.58541	1.78602	1.75331	2.08905	1.70957	1.79227	5.60401	8.77391
2.8	2.04919	3.2059	2.30656	1.56705	3.41178	1.69441	8.41024	5.99818
3	4.73822	3.82504	1.51402	1.53212	5.3804	2.32577	7.28401	3.0194
3.2	2.13572	2.78309	1.71658	1.29898	3.4144	1.07946	11.094	5.57836
3.4	3.54578	2.88296	1.56333	1.24213	4.24693	1.22515	7.87987	6.63467
3.6	2.93123	1.87709	1.73092	1.19118	5.61078	1.99009	4.23404	8.3294
3.8	5.07155	1.36295	1.337	1.54802	1.73207	1.97543	3.15127	7.36677
4	2.44433	1.40709	1.28356	1.55018	4.05918	2.03749	3.33575	9.41499
4.2	2.76051	1.55909	2.32031	1.63312	3.75522	1.33221	8.27045	10.584
4.4	3.68913	2.05589	1.84129	1.64012	7.15591	2.2266	8.28752	8.7514
4.6	2.87616	1.89279	2.0746	1.0304	3.83706	1.73923	9.05464	6.8922
4.8	6.06885	1.93983	1.45596	1.50793	3.93894	2.71531	9.32394	8.06792
5	5.467	2.98369	2.12496	1.42317	5.17755	2.1733	8.03826	7.46736
5.2	4.62957	2.7631	2.55042	1.25064	8.348	2.33059	8.4851	6.06138
5.4	4.47547	1.13852	2.6627	1.07624	2.85583	1.45879	11.4322	6.87733
5.6	5.05027	3.14786	2.85844	1.20558	2.0963	1.95042	8.62689	6.21757
5.8	3.56522	2.54968	2.82202	1.56728	4.22107	2.71757	8.15045	5.06947
6	5.06981	5.28196	2.41419	1.11247	4.20906	2.26429	7.64849	5.47661
6.2	4.74096	4.34636	2.90449	1.07496	4.09492	1.80368	7.60459	3.94558
6.4	3.39689	5.90584	2.04562	0.763247	5.36582	1.36741	7.84419	5.90903
6.6	1.17016	5.53915	2.74509	1.2518	5.95217	2.18245	8.37206	4.4203
6.8	3.28118	6.12541	3.35077	0.999635	6.70458	2.14995	4.0678	4.67571
7	3.50297	5.52277	3.02409	1.20854	6.01325	2.25783	3.65426	4.10592
7.2	1.75015	6.42325	2.98416	1.1595	5.78527	2.28683	3.08675	3.68338
7.4	3.43782	6.55806	3.02835	1.35267	4.79917	1.03415	3.64412	3.48693
7.6	3.14668	6.65122	3.68541	1.15426	3.67531	1.92246	2.57649	3.53178
7.8	5.48009	4.99237	3.31048	1.28486	6.82676	1.57444	2.87845	2.20389
8	2.11256	3.80898	3.32721	1.0342	4.29724	2.12204	2.26056	2.85456
8.2	3.22405	4.17748	3.26893	1.40623	3.28328	1.52935	3.03071	2.48547
8.4	1.51291	4.08606	3.60181	1.71942	2.27937	2.11384	2.91267	2.62366
8.6	3.96491	3.71944	3.93717	1.37734	1.49925	1.82848	1.77853	3.28808
8.8	1.50195	2.64065	3.3118	1.0567	1.51599	1.49026	2.776	2.13452
9	1.90712	3.40427	3.42653	1.9426	2.53803	0.880102	3.4247	1.25252
9.2	2.08383	4.79611	2.80818	1.51484	4.55454	1.50337	4.72253	1.71577
9.4	2.20815	2.52431	3.07803	1.34214	4.57468	1.84762	2.72974	1.56215
9.6	2.66025	2.65302	4.27231	1.31156	4.91893	1.86875	1.28024	1.14186
9.8	2.64812	2.69632	3.81023	1.0786	1.67037	2.2649	2.47639	2.12753
10	3.72863	2.67696	4.66773	1.43617	4.47072	2.10758	1.75474	1.02881
10.2	3.16574	2.67986	6.01465	1.3177	1.4967	1.6874	1.38182	3.46985
10.4	5.20754	2.75184	6.49029	2.19602	1.92496	1.02101	1.58125	1.17785
10.6	3.81587	2.0413	3.99821	1.19065	3.15199	2.1948	2.21361	1.49221
10.8	3.09449	2.47329	3.53392	1.55835	4.46648	2.19707	1.88381	1.25717
11	4.86122	2.23074	5.77507	1.83157	4.8061	1.81064	0.56099	1.41876
11.2	9.18029	3.18861	5.06705	1.8417	2.25642	1.59131	2.2704	1.75611
11.4	4.44347	2.13138	3.07573	1.60233	1.64213	1.63525	1.58932	1.54805
11.6	4.4564	3.01645	3.44819	1.7617	2.12264	2.16195	4.17494	1.6874
11.8	3.95165	3.85659	4.16683	1.52206	3.03611	1.47321	8.72548	2.79687
12	5.5684	3.00129	3.51555	1.52745	3.25253	1.75627	3.87113	2.98999
12.2	4.27455	2.13948	3.85179	1.367	6.07505	1.51226	2.72692	4.17049
12.4	3.34504	2.72339	3.30655	1.35133	6.32386	2.38206	0.737784	3.12046
12.6	3.04033	4.32922	3.56991	1.31802	4.89368	2.11429	2.6008	2.00888
12.8	4.76995	4.07731	3.75393	1.18178	9.34578	2.49361	2.67779	1.5515
13	3.01733	4.86583	3.94931	1.10922	9.06578	2.63805	1.91818	1.35927
13.2	3.74958	3.94381	5.00011	1.43404	8.61068	2.27011	2.80431	2.26757
13.4	3.17051	3.67724	3.79503	0.999829	8.49166	1.87651	3.03993	2.68819
13.6	3.22472	3.96804	2.81382	1.31636	8.17846	1.87127	2.73316	1.22857
13.8	4.07429	4.19774	3.47497	1.71772	5.99036	1.41542	2.58258	2.44922
14	5.19886	3.24853	3.34076	1.42192	9.33706	2.45516	2.28379	1.72656
14.2	3.56671	4.31558	2.79186	1.64625	6.32971	2.49166	0.811003	2.79297
14.4	3.96382	4.31118	2.52436	2.22322	6.67148	1.76604	3.32304	2.05626
14.6	3.31097	4.20674	2.30282	1.18887	4.96789	1.55675	1.37762	3.32055
14.8	3.80554	5.44784	2.88357	1.78278	3.50333	1.93806	3.11849	3.48014
15	2.65561	7.16619	3.08346	1.87495	5.25923	2.40792	1.24053	1.38808
15.2	2.53189	5.19951	2.34563	2.3631	6.16291	1.39286	5.45521	1.83651
15.4	4.14821	6.28454	2.59872	2.61325	4.67551	2.33549	3.59383	2.44695
15.6	3.91585	6.50291	2.449	2.68169	4.40291	2.03191	1.41641	3.01341
15.8	1.88636	7.73844	2.03549	2.53303	4.40609	1.36958	3.32934	4.31848
16	3.16107	7.43063	1.84197	2.03969	3.68536	2.02636	3.17398	2.02613
16.2	3.41909	5.37228	2.54029	2.11192	9.53279	1.79513	1.92958	2.43961
16.4	3.74546	5.36681	1.8827	1.69828	3.40266	0.920359	3.02244	2.51234
16.6	3.41228	4.73264	2.5903	1.74257	5.00576	2.26189	3.15313	3.45925
16.8	4.11443	4.77841	3.37267	1.66937	1.832	1.48895	0.8429	1.65832
17	3.0506	3.45854	2.95192	1.70854	5.37213	1.60163	2.20118	0.868562
17.2	2.14599	3.89408	2.97141	2.13221	3.57931	3.07086	2.53066	2.02597
17.4	3.15226	4.81705	2.48693	2.04046	3.05522	2.07154	3.59128	1.58837
17.6	4.1474	4.57245	2.86533	1.95022	6.95069	2.1658	1.34224	0.857203
17.8	2.09236	5.65315	3.09881	2.91662	6.36561	1.26778	2.5558	2.96318
18	2.31858	4.32858	3.76635	2.35504	3.30832	2.32537	1.69981	3.87152
18.2	1.69657	4.10558	3.55431	2.99637	3.3343	2.10163	4.42848	2.71461
18.4	2.24722	5.8065	4.26567	3.49037	7.00228	2.51266	3.41735	2.03029
18.6	1.01667	6.78924	3.44562	4.48162	6.61828	2.1091	2.32983	1.68188
18.8	3.40893	7.43469	3.6945	4.60635	4.55295	1.61891	0.892744	1.35791
19	2.3946	9.13776	3.86853	4.86426	3.69978	2.15922	1.63373	1.70844
19.2	1.10613	7.77811	2.626	4.97754	4.97174	1.18837	2.91753	1.78844
19.4	3.04039	8.08952	1.94599	4.44907	3.52456	1.96901	1.60209	4.32899
19.6	1.73788	10.5104	1.07817	4.70628	3.68365	2.35151	2.00035	2.40871
19.8	1.80499	8.85329	1.33418	3.3985	6.2426	1.54204	2.01998	2.07904
20	2.17029	9.35788	1.24062	2.83747	2.79837	1.44394	1.97206	1.10804
20.2	1.90327	10.7345	0.804457	2.67432	5.08855	2.07387	2.98248	3.38462
20.4	2.07251	13.7644	0.797651	2.08149	4.1526	2.28491	3.95765	1.74988
20.6	3.32914	13.034	1.25439	1.48522	5.87304	2.14337	2.77753	0.449602
20.8	1.49293	11.8917	1.07699	1.66726	7.05904	2.49292	2.79443	1.62642
21	1.60471	12.5897	1.13685	1.92668	5.66669	2.12232	1.4909	1.69113
21.2	1.93964	13.1318	0.973238	1.94606	2.84135	1.37746	2.25944	1.49947
21.4	2.44766	14.098	1.49964	1.8834	5.98008	0.884916	3.24609	2.2096
21.6	4.13334	13.2895	1.33307	1.72782	6.34527	1.96903	4.37608	2.18871
21.8	2.16272	12.1964	1.50496	2.00567	7.19037	1.47635	3.36011	1.61967
22	2.80472	11.1701	1.60996	1.967	5.04512	1.58003	3.2972	2.13093
22.2	2.93632	10.4177	1.33373	2.10829	6.28187	1.98766	1.3771	2.25104
22.4	1.83502	12.0075	0.841729	1.37942	5.04254	1.11359	2.83218	2.09357
22.6	2.32994	9.69917	1.21887	1.8295	6.32774	1.60244	0.914476	1.96906
22.8	3.32273	9.73079	1.40363	1.434	5.22003	1.7457	3.00867	1.15043
23	3.0764	8.73155	1.53124	1.36459	4.31945	2.44102	1.52029	1.05405
23.2	3.51797	6.99184	1.75379	1.25765	4.23697	2.02348	1.39444	2.7849
23.4	2.23558	7.2423	1.94592	1.62427	3.01227	1.38205	2.04558	5.94229
23.6	1.83505	5.1393	2.37688	1.87451	2.39769	1.70522	2.02465	6.65581
23.8	2.16272	5.15134	1.54917	1.72187	2.98145	2.37762	2.85486	6.17325
24	3.03166	4.83664	1.88343	1.49683	2.29021	1.21984	2.79778	5.64609
24.2	2.60265	3.76949	2.11818	2.12147	1.55314	2.27757	4.64558	4.83701
24.4	3.02225	4.52428	1.60407	1.77055	0.562367	1.87181	4.09077	3.70446
24.6	4.65296	6.00228	1.64078	1.28589	4.90143	1.46966	4.3921	4.45058
24.8	3.48595	7.58344	1.55726	1.9607	2.47044	2.18571	4.74667	4.87982
25	2.40874	9.44777	1.59384	1.82078	2.40015	1.83837	2.25313	2.34696
25.2	2.94654	8.29078	2.08702	1.6065	4.27939	2.0176	1.96286	3.05078
25.4	3.36618	10.9847	3.17639	1.83661	1.10572	1.7338	3.10846	6.02198
25.6	3.68854	10.2966	3.10785	1.96361	2.0549	1.3676	4.52453	4.45192
25.8	1.59404	10.9239	2.70249	2.27758	2.00697	2.225	4.58762	4.44138
26	1.30257	7.3337	2.51857	2.06199	3.62907	1.80323	4.07121	3.55246
26.2	1.3759	4.18187	2.1522	1.87293	3.02383	1.12296	4.11358	2.19046
26.4	1.34628	3.53889	3.00894	2.05486	4.75739	1.82468	2.76163	3.18857
26.6	2.21533	3.59795	2.36609	2.1923	0.180332	1.34702	1.83113	3.90025
26.8	1.31631	1.57576	2.66331	2.54394	2.81117	1.06902	2.26908	4.58516
27	2.35519	1.88085	2.92353	3.12854	5.3882	2.05671	2.37939	3.99328
27.2	2.37938	1.4307	2.85649	2.90704	2.07022	1.7558	2.01085	4.41323
27.4	1.75027	0.167897	2.78207	2.08738	3.22352	1.66834	3.36864	4.46881
27.6	0.752546	1.41319	2.22069	2.69545	2.50898	0.983574	2.62541	3.90098
27.8	0.88596	1.06712	1.75202	2.76326	3.17459	1.87864	1.64051	4.91358
28	1.95304	1.46009	1.66528	2.36772	0.45896	2.3447	2.28349	4.70164
28.2	1.0981	1.20269	1.42622	2.28444	3.79285	1.7463	3.08889	3.58995
28.4	2.7963	0.902927	1.39791	2.64399	1.18429	1.42739	4.24539	3.6452
28.6	1.75563	0.311313	2.34924	2.21098	1.21984	1.32752	4.55171	4.12849
28.8	0.551375	1.40948	1.72805	2.03344	4.14073	1.0138	6.29983	4.58283
29	3.2077	2.08901	2.02695	1.78541	3.34485	1.89622	8.30151	3.85627
29.2	3.43941	1.68532	1.1993	1.90807	2.98314	1.15045	4.65282	3.12398
29.4	0.800175	1.5923	1.34525	2.26677	0.776547	1.771	4.43688	1.36032
29.6	3.41022	2.24604	0.872741	2.17288	3.24777	2.35465	3.02438	1.1636
29.8	1.66836	1.76995	1.287	1.90333	2.61408	1.52638	4.27989	2.41714
30	2.08629	2.9959	1.60388	1.87824	4.41057	1.57082	9.27225	2.57715
		Cumulative Value
	Axon1	Axon2	Axon3	Axon4	Axon6	Axon7	Axon8	Axon9
Summary	447.94	732.623	384.111	281.641	632.741	280.381	568.263	584.993

## Sheet: WT-Culture1-seq03
		Raw Data
Time (S)	Area1	Angle1	IntDen1	RawIntDen1	Length1	Area2	Angle2	IntDen2	RawIntDen2	Length2	Area3	Angle3	IntDen3	RawIntDen3	Length3	Area4	Angle4	IntDen4	RawIntDen4	Length4	Area5	IntDen5	RawIntDen5	Area6	Angle6	IntDen6	RawIntDen6	Length6	Area7	Angle7	IntDen7	RawIntDen7	Length7	Area8	Angle8	IntDen8	RawIntDen8	Length8	Area9	Angle9	IntDen9	RawIntDen9	Length9
0	8	-51.3402	14754.1	14754.1	6.54074	8	0	18895.3	18895.3	6.66876	9	-39.8056	18939.7	18939.7	7.81203	8	51.3402	18372.6	18372.6	6.61648	1129	1.70546e+06	1.70546e+06	7	59.0362	13757.9	13757.9	6.38847	6	-30.9638	22746.1	22746.1	5.1728	6	-68.1986	25094.2	25094.2	5.36773	8	45	15710.5	15710.5	6.73842
0.2	8	-51.3402	16536.4	16536.4	6.54074	8	0	10791.4	10791.4	6.66876	9	-39.8056	19379.7	19379.7	7.81203	8	51.3402	17127.4	17127.4	6.61648	1129	1.27114e+06	1.27114e+06	7	59.0362	11875.4	11875.4	6.38847	6	-30.9638	23914.4	23914.4	5.1728	6	-68.1986	25463.9	25463.9	5.36773	8	45	14201.8	14201.8	6.73842
0.4	8	-51.3402	16089	16089	6.54074	8	0	16239.8	16239.8	6.66876	9	-39.8056	18682.9	18682.9	7.81203	8	51.3402	16689.2	16689.2	6.61648	1129	1.31236e+06	1.31236e+06	7	59.0362	11954.4	11954.4	6.38847	6	-30.9638	20362.6	20362.6	5.1728	6	-68.1986	20706.8	20706.8	5.36773	8	45	14176.8	14176.8	6.73842
0.6	8	-51.3402	14956.1	14956.1	6.54074	8	0	14928.4	14928.4	6.66876	9	-39.8056	15700.4	15700.4	7.81203	8	51.3402	15911.9	15911.9	6.61648	1129	1337467	1337467	7	59.0362	13335.3	13335.3	6.38847	6	-30.9638	20598.5	20598.5	5.1728	6	-68.1986	24163.3	24163.3	5.36773	8	45	17442.9	17442.9	6.73842
0.8	8	-51.3402	17326.9	17326.9	6.54074	8	0	15028.2	15028.2	6.66876	9	-39.8056	18100.2	18100.2	7.81203	8	51.3402	19878.2	19878.2	6.61648	1129	1346602	1346602	7	59.0362	11633.3	11633.3	6.38847	6	-30.9638	19421.9	19421.9	5.1728	6	-68.1986	22247.5	22247.5	5.36773	8	45	12865.9	12865.9	6.73842
1	8	-51.3402	12652.8	12652.8	6.54074	8	0	13639	13639	6.66876	9	-39.8056	18748.3	18748.3	7.81203	8	51.3402	19146.8	19146.8	6.61648	1129	1.28977e+06	1.28977e+06	7	59.0362	13196.4	13196.4	6.38847	6	-30.9638	17469.2	17469.2	5.1728	6	-68.1986	17377.7	17377.7	5.36773	8	45	15016.7	15016.7	6.73842
1.2	8	-51.3402	16452.9	16452.9	6.54074	8	0	17006.4	17006.4	6.66876	9	-39.8056	16866.7	16866.7	7.81203	8	51.3402	18396	18396	6.61648	1129	1.33531e+06	1.33531e+06	7	59.0362	9311.89	9311.89	6.38847	6	-30.9638	17725	17725	5.1728	6	-68.1986	20846.3	20846.3	5.36773	8	45	14990.7	14990.7	6.73842
1.4	8	-51.3402	12354.8	12354.8	6.54074	8	0	14281.7	14281.7	6.66876	9	-39.8056	23204.2	23204.2	7.81203	8	51.3402	19239.7	19239.7	6.61648	1129	1.24927e+06	1.24927e+06	7	59.0362	12307.1	12307.1	6.38847	6	-30.9638	22610.7	22610.7	5.1728	6	-68.1986	27162.3	27162.3	5.36773	8	45	16472.9	16472.9	6.73842
1.6	8	-51.3402	17133	17133	6.54074	8	0	13472	13472	6.66876	9	-39.8056	22317.2	22317.2	7.81203	8	51.3402	18242.8	18242.8	6.61648	1129	1.32666e+06	1.32666e+06	7	59.0362	12028.4	12028.4	6.38847	6	-30.9638	26353	26353	5.1728	6	-68.1986	21152.2	21152.2	5.36773	8	45	14424.3	14424.3	6.73842
1.8	8	-51.3402	15739.2	15739.2	6.54074	8	0	12463.6	12463.6	6.66876	9	-39.8056	22340.3	22340.3	7.81203	8	51.3402	14245.2	14245.2	6.61648	1129	1.28559e+06	1.28559e+06	7	59.0362	13614.9	13614.9	6.38847	6	-30.9638	19278.8	19278.8	5.1728	6	-68.1986	19559.7	19559.7	5.36773	8	45	11957.3	11957.3	6.73842
2	8	-51.3402	10935.6	10935.6	6.54074	8	0	12523.3	12523.3	6.66876	9	-39.8056	19538.4	19538.4	7.81203	8	51.3402	22521.8	22521.8	6.61648	1129	1306268	1306268	7	59.0362	12560.4	12560.4	6.38847	6	-30.9638	24858.7	24858.7	5.1728	6	-68.1986	15343	15343	5.36773	8	45	13349.7	13349.7	6.73842
2.2	8	-51.3402	16832.3	16832.3	6.54074	8	0	14385	14385	6.66876	9	-39.8056	21266.5	21266.5	7.81203	8	51.3402	16886	16886	6.61648	1129	1.30729e+06	1.30729e+06	7	59.0362	14141.9	14141.9	6.38847	6	-30.9638	31223.3	31223.3	5.1728	6	-68.1986	19760.4	19760.4	5.36773	8	45	13773.4	13773.4	6.73842
2.4	8	-51.3402	14365	14365	6.54074	8	0	14668.4	14668.4	6.66876	9	-39.8056	18656.2	18656.2	7.81203	8	51.3402	22560.7	22560.7	6.61648	1129	1.31117e+06	1.31117e+06	7	59.0362	10147.3	10147.3	6.38847	6	-30.9638	24050	24050	5.1728	6	-68.1986	20218.6	20218.6	5.36773	8	45	13546.9	13546.9	6.73842
2.6	8	-51.3402	12709.8	12709.8	6.54074	8	0	13503.8	13503.8	6.66876	9	-39.8056	18849.6	18849.6	7.81203	8	51.3402	15870.2	15870.2	6.61648	1129	1.27253e+06	1.27253e+06	7	59.0362	11559.4	11559.4	6.38847	6	-30.9638	24205.3	24205.3	5.1728	6	-68.1986	16213.5	16213.5	5.36773	8	45	13293.6	13293.6	6.73842
2.8	8	-51.3402	15044.7	15044.7	6.54074	8	0	11994.4	11994.4	6.66876	9	-39.8056	20645	20645	7.81203	8	51.3402	14788.5	14788.5	6.61648	1129	1.30843e+06	1.30843e+06	7	59.0362	12743.1	12743.1	6.38847	6	-30.9638	20922.8	20922.8	5.1728	6	-68.1986	17625.6	17625.6	5.36773	8	45	13077.6	13077.6	6.73842
3	8	-51.3402	15375.2	15375.2	6.54074	8	0	14017.8	14017.8	6.66876	9	-39.8056	25527.1	25527.1	7.81203	8	51.3402	16868.1	16868.1	6.61648	1129	1.32654e+06	1.32654e+06	7	59.0362	12704.1	12704.1	6.38847	6	-30.9638	17746.8	17746.8	5.1728	6	-68.1986	21215	21215	5.36773	8	45	14414.3	14414.3	6.73842
3.2	8	-51.3402	15712.1	15712.1	6.54074	8	0	13864.8	13864.8	6.66876	9	-39.8056	21656.3	21656.3	7.81203	8	51.3402	25060.5	25060.5	6.61648	1129	1.36382e+06	1.36382e+06	7	59.0362	12959.8	12959.8	6.38847	6	-30.9638	20052.9	20052.9	5.1728	6	-68.1986	20574.5	20574.5	5.36773	8	45	14176.2	14176.2	6.73842
3.4	8	-51.3402	14815.4	14815.4	6.54074	8	0	17537.9	17537.9	6.66876	9	-39.8056	20891.8	20891.8	7.81203	8	51.3402	18126.1	18126.1	6.61648	1129	1.29457e+06	1.29457e+06	7	59.0362	8121.08	8121.08	6.38847	6	-30.9638	19403.5	19403.5	5.1728	6	-68.1986	19122.9	19122.9	5.36773	8	45	13727.7	13727.7	6.73842
3.6	8	-51.3402	14870	14870	6.54074	8	0	15229.1	15229.1	6.66876	9	-39.8056	21987	21987	7.81203	8	51.3402	21570.3	21570.3	6.61648	1129	1.33689e+06	1.33689e+06	7	59.0362	11216.9	11216.9	6.38847	6	-30.9638	19807.2	19807.2	5.1728	6	-68.1986	18177.6	18177.6	5.36773	8	45	11668.1	11668.1	6.73842
3.8	8	-51.3402	18046.5	18046.5	6.54074	8	0	9660.13	9660.13	6.66876	9	-39.8056	24038.1	24038.1	7.81203	8	51.3402	18563.9	18563.9	6.61648	1129	1.27891e+06	1.27891e+06	7	59.0362	10691.5	10691.5	6.38847	6	-30.9638	20010.8	20010.8	5.1728	6	-68.1986	16418.5	16418.5	5.36773	8	45	15489.9	15489.9	6.73842
4	8	-51.3402	12984.4	12984.4	6.54074	8	0	12733.2	12733.2	6.66876	9	-39.8056	23577.3	23577.3	7.81203	8	51.3402	17794.1	17794.1	6.61648	1129	1.34466e+06	1.34466e+06	7	59.0362	10580.4	10580.4	6.38847	6	-30.9638	28472.5	28472.5	5.1728	6	-68.1986	16500.7	16500.7	5.36773	8	45	13848.2	13848.2	6.73842
4.2	8	-51.3402	17974.3	17974.3	6.54074	8	0	12576.2	12576.2	6.66876	9	-39.8056	20679.5	20679.5	7.81203	8	51.3402	16158.2	16158.2	6.61648	1129	1.26729e+06	1.26729e+06	7	59.0362	9635.56	9635.56	6.38847	6	-30.9638	34385.1	34385.1	5.1728	6	-68.1986	17582	17582	5.36773	8	45	18344.9	18344.9	6.73842
4.4	8	-51.3402	15945.2	15945.2	6.54074	8	0	17959.5	17959.5	6.66876	9	-39.8056	25241.8	25241.8	7.81203	8	51.3402	19693.3	19693.3	6.61648	1129	1.28633e+06	1.28633e+06	7	59.0362	11022	11022	6.38847	6	-30.9638	28595.6	28595.6	5.1728	6	-68.1986	16813.5	16813.5	5.36773	8	45	13340.7	13340.7	6.73842
4.6	8	-51.3402	16363.6	16363.6	6.54074	8	0	11814.6	11814.6	6.66876	9	-39.8056	26536.6	26536.6	7.81203	8	51.3402	20635.1	20635.1	6.61648	1129	1.34629e+06	1.34629e+06	7	59.0362	10730.8	10730.8	6.38847	6	-30.9638	35235.2	35235.2	5.1728	6	-68.1986	16727.7	16727.7	5.36773	8	45	16183.9	16183.9	6.73842
4.8	8	-51.3402	15164.3	15164.3	6.54074	8	0	15979.3	15979.3	6.66876	9	-39.8056	27759.8	27759.8	7.81203	8	51.3402	18091.2	18091.2	6.61648	1129	1.34773e+06	1.34773e+06	7	59.0362	20916.6	20916.6	6.38847	6	-30.9638	35550.4	35550.4	5.1728	6	-68.1986	17925.6	17925.6	5.36773	8	45	14492.8	14492.8	6.73842
5	8	-51.3402	20461.8	20461.8	6.54074	8	0	14254.7	14254.7	6.66876	9	-39.8056	24382.8	24382.8	7.81203	8	51.3402	23669.8	23669.8	6.61648	1129	1.31084e+06	1.31084e+06	7	59.0362	16694.5	16694.5	6.38847	6	-30.9638	39258.4	39258.4	5.1728	6	-68.1986	14399.5	14399.5	5.36773	8	45	14382.7	14382.7	6.73842
5.2	8	-51.3402	15274.5	15274.5	6.54074	8	0	18127.8	18127.8	6.66876	9	-39.8056	27166.6	27166.6	7.81203	8	51.3402	21677.7	21677.7	6.61648	1129	1.2712e+06	1.2712e+06	7	59.0362	21408.4	21408.4	6.38847	6	-30.9638	31148.1	31148.1	5.1728	6	-68.1986	14990.3	14990.3	5.36773	8	45	14926.3	14926.3	6.73842
5.4	8	-51.3402	16505	16505	6.54074	8	0	18008.5	18008.5	6.66876	9	-39.8056	23529.8	23529.8	7.81203	8	51.3402	20749.6	20749.6	6.61648	1129	1.32613e+06	1.32613e+06	7	59.0362	22421.3	22421.3	6.38847	6	-30.9638	29800.2	29800.2	5.1728	6	-68.1986	14170	14170	5.36773	8	45	14963.9	14963.9	6.73842
5.6	8	-51.3402	15324.4	15324.4	6.54074	8	0	20693.3	20693.3	6.66876	9	-39.8056	18840.3	18840.3	7.81203	8	51.3402	20467.8	20467.8	6.61648	1129	1.33397e+06	1.33397e+06	7	59.0362	26279.2	26279.2	6.38847	6	-30.9638	35102	35102	5.1728	6	-68.1986	14350.8	14350.8	5.36773	8	45	14055.5	14055.5	6.73842
5.8	8	-51.3402	14670.6	14670.6	6.54074	8	0	19368.3	19368.3	6.66876	9	-39.8056	20552.5	20552.5	7.81203	8	51.3402	18849.7	18849.7	6.61648	1129	1.37355e+06	1.37355e+06	7	59.0362	22151.9	22151.9	6.38847	6	-30.9638	39630.4	39630.4	5.1728	6	-68.1986	14454.3	14454.3	5.36773	8	45	12514.8	12514.8	6.73842
6	8	-51.3402	12812.8	12812.8	6.54074	8	0	18010	18010	6.66876	9	-39.8056	17550.3	17550.3	7.81203	8	51.3402	20124.2	20124.2	6.61648	1129	1.30686e+06	1.30686e+06	7	59.0362	24976.7	24976.7	6.38847	6	-30.9638	33217.6	33217.6	5.1728	6	-68.1986	16179.8	16179.8	5.36773	8	45	16438.3	16438.3	6.73842
6.2	8	-51.3402	20353.7	20353.7	6.54074	8	0	21370.3	21370.3	6.66876	9	-39.8056	17031.9	17031.9	7.81203	8	51.3402	18473.4	18473.4	6.61648	1129	1.31584e+06	1.31584e+06	7	59.0362	19349.9	19349.9	6.38847	6	-30.9638	35322.6	35322.6	5.1728	6	-68.1986	16525.5	16525.5	5.36773	8	45	13964.5	13964.5	6.73842
6.4	8	-51.3402	18969.9	18969.9	6.54074	8	0	31700	31700	6.66876	9	-39.8056	17822.7	17822.7	7.81203	8	51.3402	20058.3	20058.3	6.61648	1129	1.34147e+06	1.34147e+06	7	59.0362	17897	17897	6.38847	6	-30.9638	25021.5	25021.5	5.1728	6	-68.1986	16199.4	16199.4	5.36773	8	45	17248.4	17248.4	6.73842
6.6	8	-51.3402	17216.8	17216.8	6.54074	8	0	24900.8	24900.8	6.66876	9	-39.8056	22665.2	22665.2	7.81203	8	51.3402	17119.7	17119.7	6.61648	1129	1.28188e+06	1.28188e+06	7	59.0362	19565.5	19565.5	6.38847	6	-30.9638	22549.9	22549.9	5.1728	6	-68.1986	15839.7	15839.7	5.36773	8	45	16103.7	16103.7	6.73842
6.8	8	-51.3402	14973.6	14973.6	6.54074	8	0	20825.8	20825.8	6.66876	9	-39.8056	22530.1	22530.1	7.81203	8	51.3402	16308.1	16308.1	6.61648	1129	1.3198e+06	1.3198e+06	7	59.0362	20694.3	20694.3	6.38847	6	-30.9638	25564.6	25564.6	5.1728	6	-68.1986	15593.6	15593.6	5.36773	8	45	16298.5	16298.5	6.73842
7	8	-51.3402	17907.2	17907.2	6.54074	8	0	22812.4	22812.4	6.66876	9	-39.8056	21096.8	21096.8	7.81203	8	51.3402	13686.8	13686.8	6.61648	1129	1.36923e+06	1.36923e+06	7	59.0362	21641.4	21641.4	6.38847	6	-30.9638	24926.6	24926.6	5.1728	6	-68.1986	17255.1	17255.1	5.36773	8	45	17224.6	17224.6	6.73842
7.2	8	-51.3402	15841.3	15841.3	6.54074	8	0	27404	27404	6.66876	9	-39.8056	24920.5	24920.5	7.81203	8	51.3402	16724.1	16724.1	6.61648	1129	1342393	1342393	7	59.0362	15506	15506	6.38847	6	-30.9638	29580.9	29580.9	5.1728	6	-68.1986	20106.6	20106.6	5.36773	8	45	17514.9	17514.9	6.73842
7.4	8	-51.3402	14160.1	14160.1	6.54074	8	0	20221.5	20221.5	6.66876	9	-39.8056	22045.5	22045.5	7.81203	8	51.3402	20007.7	20007.7	6.61648	1129	1.30624e+06	1.30624e+06	7	59.0362	17962.8	17962.8	6.38847	6	-30.9638	25496.1	25496.1	5.1728	6	-68.1986	18817.2	18817.2	5.36773	8	45	15825.5	15825.5	6.73842
7.6	8	-51.3402	16552.5	16552.5	6.54074	8	0	21947.9	21947.9	6.66876	9	-39.8056	26247.5	26247.5	7.81203	8	51.3402	15021.8	15021.8	6.61648	1129	1.32505e+06	1.32505e+06	7	59.0362	21135	21135	6.38847	6	-30.9638	32910.6	32910.6	5.1728	6	-68.1986	22708.5	22708.5	5.36773	8	45	15819.2	15819.2	6.73842
7.8	8	-51.3402	16818.5	16818.5	6.54074	8	0	24004.8	24004.8	6.66876	9	-39.8056	32463.5	32463.5	7.81203	8	51.3402	18317.2	18317.2	6.61648	1129	1.32522e+06	1.32522e+06	7	59.0362	20677.8	20677.8	6.38847	6	-30.9638	36599.4	36599.4	5.1728	6	-68.1986	21424.4	21424.4	5.36773	8	45	17804.5	17804.5	6.73842
8	8	-51.3402	18763.4	18763.4	6.54074	8	0	19701.1	19701.1	6.66876	9	-39.8056	30273	30273	7.81203	8	51.3402	16563.5	16563.5	6.61648	1129	1.36988e+06	1.36988e+06	7	59.0362	19828.7	19828.7	6.38847	6	-30.9638	55442.8	55442.8	5.1728	6	-68.1986	19159.1	19159.1	5.36773	8	45	13828.9	13828.9	6.73842
8.2	8	-51.3402	13445.8	13445.8	6.54074	8	0	16407.2	16407.2	6.66876	9	-39.8056	25481.2	25481.2	7.81203	8	51.3402	18643.7	18643.7	6.61648	1129	1.3098e+06	1.3098e+06	7	59.0362	14992.9	14992.9	6.38847	6	-30.9638	56408.7	56408.7	5.1728	6	-68.1986	20563.8	20563.8	5.36773	8	45	16490	16490	6.73842
8.4	8	-51.3402	14407.7	14407.7	6.54074	8	0	26831.2	26831.2	6.66876	9	-39.8056	24843.8	24843.8	7.81203	8	51.3402	14777	14777	6.61648	1129	1.32825e+06	1.32825e+06	7	59.0362	18688.7	18688.7	6.38847	6	-30.9638	55116.3	55116.3	5.1728	6	-68.1986	26617.5	26617.5	5.36773	8	45	16205.5	16205.5	6.73842
8.6	8	-51.3402	15549.6	15549.6	6.54074	8	0	26598.1	26598.1	6.66876	9	-39.8056	20620.2	20620.2	7.81203	8	51.3402	12729.2	12729.2	6.61648	1129	1329087	1329087	7	59.0362	18376.8	18376.8	6.38847	6	-30.9638	68709	68709	5.1728	6	-68.1986	20822	20822	5.36773	8	45	17075.3	17075.3	6.73842
8.8	8	-51.3402	21343.3	21343.3	6.54074	8	0	26212.4	26212.4	6.66876	9	-39.8056	21037.5	21037.5	7.81203	8	51.3402	18920.5	18920.5	6.61648	1129	1.37248e+06	1.37248e+06	7	59.0362	20747.4	20747.4	6.38847	6	-30.9638	70711.1	70711.1	5.1728	6	-68.1986	23316.6	23316.6	5.36773	8	45	17467.7	17467.7	6.73842
9	8	-51.3402	17275.1	17275.1	6.54074	8	0	26143.3	26143.3	6.66876	9	-39.8056	19976.4	19976.4	7.81203	8	51.3402	11840	11840	6.61648	1129	1343712	1343712	7	59.0362	20125.5	20125.5	6.38847	6	-30.9638	68885.2	68885.2	5.1728	6	-68.1986	26521.1	26521.1	5.36773	8	45	15890.4	15890.4	6.73842
9.2	8	-51.3402	17557.7	17557.7	6.54074	8	0	23078.1	23078.1	6.66876	9	-39.8056	19778.2	19778.2	7.81203	8	51.3402	14848.9	14848.9	6.61648	1129	1.32631e+06	1.32631e+06	7	59.0362	19265.4	19265.4	6.38847	6	-30.9638	63295.7	63295.7	5.1728	6	-68.1986	23690.4	23690.4	5.36773	8	45	15346	15346	6.73842
9.4	8	-51.3402	17150.5	17150.5	6.54074	8	0	20426.5	20426.5	6.66876	9	-39.8056	25020.4	25020.4	7.81203	8	51.3402	15358.4	15358.4	6.61648	1129	1.31592e+06	1.31592e+06	7	59.0362	22005.1	22005.1	6.38847	6	-30.9638	66145.1	66145.1	5.1728	6	-68.1986	28615.8	28615.8	5.36773	8	45	16833.8	16833.8	6.73842
9.6	8	-51.3402	19760	19760	6.54074	8	0	22538	22538	6.66876	9	-39.8056	32982.3	32982.3	7.81203	8	51.3402	13521.6	13521.6	6.61648	1129	1.40427e+06	1.40427e+06	7	59.0362	21450.5	21450.5	6.38847	6	-30.9638	79183.2	79183.2	5.1728	6	-68.1986	20418.2	20418.2	5.36773	8	45	16364.6	16364.6	6.73842
9.8	8	-51.3402	18788.9	18788.9	6.54074	8	0	22767	22767	6.66876	9	-39.8056	28979.4	28979.4	7.81203	8	51.3402	18071.8	18071.8	6.61648	1129	1.372e+06	1.372e+06	7	59.0362	18111.3	18111.3	6.38847	6	-30.9638	79177.5	79177.5	5.1728	6	-68.1986	21417.4	21417.4	5.36773	8	45	14230.6	14230.6	6.73842
10	8	-51.3402	18527.6	18527.6	6.54074	8	0	24658.5	24658.5	6.66876	9	-39.8056	24904.2	24904.2	7.81203	8	51.3402	13673.7	13673.7	6.61648	1129	1.31717e+06	1.31717e+06	7	59.0362	17277.2	17277.2	6.38847	6	-30.9638	79475.2	79475.2	5.1728	6	-68.1986	18591	18591	5.36773	8	45	15797.8	15797.8	6.73842
10.2	8	-51.3402	18608.1	18608.1	6.54074	8	0	21303.8	21303.8	6.66876	9	-39.8056	25535.4	25535.4	7.81203	8	51.3402	14448.6	14448.6	6.61648	1129	1307715	1307715	7	59.0362	17252.8	17252.8	6.38847	6	-30.9638	66747.5	66747.5	5.1728	6	-68.1986	24195.9	24195.9	5.36773	8	45	19074	19074	6.73842
10.4	8	-51.3402	20286.1	20286.1	6.54074	8	0	24738.5	24738.5	6.66876	9	-39.8056	24928.7	24928.7	7.81203	8	51.3402	15857.2	15857.2	6.61648	1129	1.37998e+06	1.37998e+06	7	59.0362	24400.6	24400.6	6.38847	6	-30.9638	64796.7	64796.7	5.1728	6	-68.1986	23582.2	23582.2	5.36773	8	45	16309.6	16309.6	6.73842
10.6	8	-51.3402	17256.5	17256.5	6.54074	8	0	26256.7	26256.7	6.66876	9	-39.8056	30952.8	30952.8	7.81203	8	51.3402	15013.9	15013.9	6.61648	1129	1.34266e+06	1.34266e+06	7	59.0362	29462.3	29462.3	6.38847	6	-30.9638	59673.8	59673.8	5.1728	6	-68.1986	25872.3	25872.3	5.36773	8	45	17904	17904	6.73842
10.8	8	-51.3402	18745.1	18745.1	6.54074	8	0	26146.6	26146.6	6.66876	9	-39.8056	31385.2	31385.2	7.81203	8	51.3402	13535.9	13535.9	6.61648	1129	1.35412e+06	1.35412e+06	7	59.0362	31205.9	31205.9	6.38847	6	-30.9638	59943.9	59943.9	5.1728	6	-68.1986	28092.7	28092.7	5.36773	8	45	15191	15191	6.73842
11	8	-51.3402	18993.2	18993.2	6.54074	8	0	23742.7	23742.7	6.66876	9	-39.8056	33970.5	33970.5	7.81203	8	51.3402	13892.6	13892.6	6.61648	1129	1.31897e+06	1.31897e+06	7	59.0362	28688.3	28688.3	6.38847	6	-30.9638	68013.7	68013.7	5.1728	6	-68.1986	23946.8	23946.8	5.36773	8	45	18368.9	18368.9	6.73842
11.2	8	-51.3402	17322.5	17322.5	6.54074	8	0	23408.8	23408.8	6.66876	9	-39.8056	29156	29156	7.81203	8	51.3402	14968	14968	6.61648	1129	1.30031e+06	1.30031e+06	7	59.0362	30575.9	30575.9	6.38847	6	-30.9638	65613	65613	5.1728	6	-68.1986	27158.4	27158.4	5.36773	8	45	20049.4	20049.4	6.73842
11.4	8	-51.3402	17857.6	17857.6	6.54074	8	0	26359.4	26359.4	6.66876	9	-39.8056	25632.1	25632.1	7.81203	8	51.3402	16032.5	16032.5	6.61648	1129	1.32623e+06	1.32623e+06	7	59.0362	26343.3	26343.3	6.38847	6	-30.9638	71209.6	71209.6	5.1728	6	-68.1986	24123.4	24123.4	5.36773	8	45	16552.8	16552.8	6.73842
11.6	8	-51.3402	18719.4	18719.4	6.54074	8	0	20811.9	20811.9	6.66876	9	-39.8056	26122	26122	7.81203	8	51.3402	15241.3	15241.3	6.61648	1129	1.39412e+06	1.39412e+06	7	59.0362	25910.7	25910.7	6.38847	6	-30.9638	71793.6	71793.6	5.1728	6	-68.1986	24971.3	24971.3	5.36773	8	45	13963.4	13963.4	6.73842
11.8	8	-51.3402	15847.1	15847.1	6.54074	8	0	25483.2	25483.2	6.66876	9	-39.8056	36710.9	36710.9	7.81203	8	51.3402	18774.6	18774.6	6.61648	1129	1.34278e+06	1.34278e+06	7	59.0362	24368.2	24368.2	6.38847	6	-30.9638	57583.5	57583.5	5.1728	6	-68.1986	24610.2	24610.2	5.36773	8	45	13457.5	13457.5	6.73842
12	8	-51.3402	17292.9	17292.9	6.54074	8	0	23922.8	23922.8	6.66876	9	-39.8056	32925.1	32925.1	7.81203	8	51.3402	18338.5	18338.5	6.61648	1129	1.34975e+06	1.34975e+06	7	59.0362	26891.8	26891.8	6.38847	6	-30.9638	58424.3	58424.3	5.1728	6	-68.1986	32913.7	32913.7	5.36773	8	45	17952.8	17952.8	6.73842
12.2	8	-51.3402	15245.4	15245.4	6.54074	8	0	25623.3	25623.3	6.66876	9	-39.8056	32282.2	32282.2	7.81203	8	51.3402	17781.9	17781.9	6.61648	1129	1.34422e+06	1.34422e+06	7	59.0362	25188.3	25188.3	6.38847	6	-30.9638	51337.5	51337.5	5.1728	6	-68.1986	26923	26923	5.36773	8	45	20805.2	20805.2	6.73842
12.4	8	-51.3402	16682.7	16682.7	6.54074	8	0	25352.5	25352.5	6.66876	9	-39.8056	33204.2	33204.2	7.81203	8	51.3402	21007.7	21007.7	6.61648	1129	1.37097e+06	1.37097e+06	7	59.0362	28675.5	28675.5	6.38847	6	-30.9638	56057.6	56057.6	5.1728	6	-68.1986	24975.4	24975.4	5.36773	8	45	18579.8	18579.8	6.73842
12.6	8	-51.3402	20637.2	20637.2	6.54074	8	0	22817.3	22817.3	6.66876	9	-39.8056	32511.4	32511.4	7.81203	8	51.3402	22394.8	22394.8	6.61648	1129	1.34449e+06	1.34449e+06	7	59.0362	26841.4	26841.4	6.38847	6	-30.9638	53405.6	53405.6	5.1728	6	-68.1986	29885.4	29885.4	5.36773	8	45	16198.9	16198.9	6.73842
12.8	8	-51.3402	19021.7	19021.7	6.54074	8	0	28744.5	28744.5	6.66876	9	-39.8056	25080.9	25080.9	7.81203	8	51.3402	18673.4	18673.4	6.61648	1129	1.36617e+06	1.36617e+06	7	59.0362	19667.2	19667.2	6.38847	6	-30.9638	50563	50563	5.1728	6	-68.1986	28670.8	28670.8	5.36773	8	45	12595.4	12595.4	6.73842
13	8	-51.3402	15004	15004	6.54074	8	0	35531.2	35531.2	6.66876	9	-39.8056	36732.6	36732.6	7.81203	8	51.3402	23837.4	23837.4	6.61648	1129	1.29289e+06	1.29289e+06	7	59.0362	24640.6	24640.6	6.38847	6	-30.9638	54171.1	54171.1	5.1728	6	-68.1986	27942.6	27942.6	5.36773	8	45	18229.3	18229.3	6.73842
13.2	8	-51.3402	13375.4	13375.4	6.54074	8	0	30634.5	30634.5	6.66876	9	-39.8056	28232.3	28232.3	7.81203	8	51.3402	21847.8	21847.8	6.61648	1129	1.34658e+06	1.34658e+06	7	59.0362	24314.6	24314.6	6.38847	6	-30.9638	56881.9	56881.9	5.1728	6	-68.1986	22452.1	22452.1	5.36773	8	45	14533.1	14533.1	6.73842
13.4	8	-51.3402	16896.2	16896.2	6.54074	8	0	35201.2	35201.2	6.66876	9	-39.8056	27968.2	27968.2	7.81203	8	51.3402	19043.6	19043.6	6.61648	1129	1.31532e+06	1.31532e+06	7	59.0362	27716.7	27716.7	6.38847	6	-30.9638	53887.5	53887.5	5.1728	6	-68.1986	24992.4	24992.4	5.36773	8	45	20191.4	20191.4	6.73842
13.6	8	-51.3402	18025.2	18025.2	6.54074	8	0	35611.8	35611.8	6.66876	9	-39.8056	27588.5	27588.5	7.81203	8	51.3402	22692.3	22692.3	6.61648	1129	1.3833e+06	1.3833e+06	7	59.0362	27438.1	27438.1	6.38847	6	-30.9638	57335.2	57335.2	5.1728	6	-68.1986	22422.9	22422.9	5.36773	8	45	15634.2	15634.2	6.73842
13.8	8	-51.3402	16577	16577	6.54074	8	0	36291	36291	6.66876	9	-39.8056	33674.9	33674.9	7.81203	8	51.3402	22016.8	22016.8	6.61648	1129	1.32576e+06	1.32576e+06	7	59.0362	23777.5	23777.5	6.38847	6	-30.9638	50007.1	50007.1	5.1728	6	-68.1986	29231.8	29231.8	5.36773	8	45	15451.7	15451.7	6.73842
14	8	-51.3402	23162.7	23162.7	6.54074	8	0	34287.2	34287.2	6.66876	9	-39.8056	25603.2	25603.2	7.81203	8	51.3402	18821.4	18821.4	6.61648	1129	1.34163e+06	1.34163e+06	7	59.0362	27058.9	27058.9	6.38847	6	-30.9638	46933	46933	5.1728	6	-68.1986	32560.1	32560.1	5.36773	8	45	15283.2	15283.2	6.73842
14.2	8	-51.3402	17215.1	17215.1	6.54074	8	0	30512	30512	6.66876	9	-39.8056	24390	24390	7.81203	8	51.3402	21201.9	21201.9	6.61648	1129	1.35863e+06	1.35863e+06	7	59.0362	24711.4	24711.4	6.38847	6	-30.9638	47147.2	47147.2	5.1728	6	-68.1986	32334.6	32334.6	5.36773	8	45	15337.7	15337.7	6.73842
14.4	8	-51.3402	17198.6	17198.6	6.54074	8	0	39387.6	39387.6	6.66876	9	-39.8056	25567.4	25567.4	7.81203	8	51.3402	22368.3	22368.3	6.61648	1129	1.41001e+06	1.41001e+06	7	59.0362	33549.3	33549.3	6.38847	6	-30.9638	42641.9	42641.9	5.1728	6	-68.1986	27900	27900	5.36773	8	45	22024.2	22024.2	6.73842
14.6	8	-51.3402	16361.3	16361.3	6.54074	8	0	41462.1	41462.1	6.66876	9	-39.8056	22528.5	22528.5	7.81203	8	51.3402	18696.2	18696.2	6.61648	1129	1288910	1288910	7	59.0362	32205.7	32205.7	6.38847	6	-30.9638	41978.9	41978.9	5.1728	6	-68.1986	31395.8	31395.8	5.36773	8	45	16041.2	16041.2	6.73842
14.8	8	-51.3402	20333.7	20333.7	6.54074	8	0	26995.8	26995.8	6.66876	9	-39.8056	19350.2	19350.2	7.81203	8	51.3402	25411.6	25411.6	6.61648	1129	1.38613e+06	1.38613e+06	7	59.0362	27827	27827	6.38847	6	-30.9638	45634.1	45634.1	5.1728	6	-68.1986	21885.5	21885.5	5.36773	8	45	14282.8	14282.8	6.73842
15	8	-51.3402	17392.8	17392.8	6.54074	8	0	32291.2	32291.2	6.66876	9	-39.8056	17874.1	17874.1	7.81203	8	51.3402	26811.5	26811.5	6.61648	1129	1.37348e+06	1.37348e+06	7	59.0362	26110.7	26110.7	6.38847	6	-30.9638	46372.9	46372.9	5.1728	6	-68.1986	18986.8	18986.8	5.36773	8	45	15231.8	15231.8	6.73842
15.2	8	-51.3402	13326	13326	6.54074	8	0	30495.6	30495.6	6.66876	9	-39.8056	14169.4	14169.4	7.81203	8	51.3402	25412	25412	6.61648	1129	1.38921e+06	1.38921e+06	7	59.0362	27152.5	27152.5	6.38847	6	-30.9638	47527.3	47527.3	5.1728	6	-68.1986	18116	18116	5.36773	8	45	14471	14471	6.73842
15.4	8	-51.3402	18752.6	18752.6	6.54074	8	0	30822	30822	6.66876	9	-39.8056	20296.1	20296.1	7.81203	8	51.3402	24004.4	24004.4	6.61648	1129	1.34441e+06	1.34441e+06	7	59.0362	28400.2	28400.2	6.38847	6	-30.9638	46212.5	46212.5	5.1728	6	-68.1986	18580.1	18580.1	5.36773	8	45	16944.3	16944.3	6.73842
15.6	8	-51.3402	12946.7	12946.7	6.54074	8	0	27201.2	27201.2	6.66876	9	-39.8056	17405	17405	7.81203	8	51.3402	35050.4	35050.4	6.61648	1129	1.3014e+06	1.3014e+06	7	59.0362	27465.3	27465.3	6.38847	6	-30.9638	48076.9	48076.9	5.1728	6	-68.1986	18997.9	18997.9	5.36773	8	45	14358.6	14358.6	6.73842
15.8	8	-51.3402	20809	20809	6.54074	8	0	30761.6	30761.6	6.66876	9	-39.8056	21127.5	21127.5	7.81203	8	51.3402	36402.8	36402.8	6.61648	1129	1.33056e+06	1.33056e+06	7	59.0362	33016.4	33016.4	6.38847	6	-30.9638	47530.4	47530.4	5.1728	6	-68.1986	22718	22718	5.36773	8	45	14519	14519	6.73842
16	8	-51.3402	22078	22078	6.54074	8	0	28770.4	28770.4	6.66876	9	-39.8056	21530.4	21530.4	7.81203	8	51.3402	48900.3	48900.3	6.61648	1129	1.37963e+06	1.37963e+06	7	59.0362	27959.4	27959.4	6.38847	6	-30.9638	43551.4	43551.4	5.1728	6	-68.1986	23903.1	23903.1	5.36773	8	45	17273.1	17273.1	6.73842
16.2	8	-51.3402	22962.8	22962.8	6.54074	8	0	35719.5	35719.5	6.66876	9	-39.8056	19636.3	19636.3	7.81203	8	51.3402	52174	52174	6.61648	1129	1.37748e+06	1.37748e+06	7	59.0362	25702	25702	6.38847	6	-30.9638	43825.3	43825.3	5.1728	6	-68.1986	25174.6	25174.6	5.36773	8	45	12680.3	12680.3	6.73842
16.4	8	-51.3402	25039.1	25039.1	6.54074	8	0	32247.9	32247.9	6.66876	9	-39.8056	20477.7	20477.7	7.81203	8	51.3402	54756.6	54756.6	6.61648	1129	1.38336e+06	1.38336e+06	7	59.0362	25848	25848	6.38847	6	-30.9638	40302.1	40302.1	5.1728	6	-68.1986	20587.5	20587.5	5.36773	8	45	13390	13390	6.73842
16.6	8	-51.3402	16502.6	16502.6	6.54074	8	0	29951.3	29951.3	6.66876	9	-39.8056	18899.5	18899.5	7.81203	8	51.3402	43536.5	43536.5	6.61648	1129	1.37513e+06	1.37513e+06	7	59.0362	23389.5	23389.5	6.38847	6	-30.9638	41726.6	41726.6	5.1728	6	-68.1986	17702	17702	5.36773	8	45	11952.9	11952.9	6.73842
16.8	8	-51.3402	21693.5	21693.5	6.54074	8	0	27318	27318	6.66876	9	-39.8056	17628	17628	7.81203	8	51.3402	43144.5	43144.5	6.61648	1129	1.43401e+06	1.43401e+06	7	59.0362	23391.3	23391.3	6.38847	6	-30.9638	43773.6	43773.6	5.1728	6	-68.1986	18705.3	18705.3	5.36773	8	45	13766.1	13766.1	6.73842
17	8	-51.3402	18866.5	18866.5	6.54074	8	0	29857.1	29857.1	6.66876	9	-39.8056	21577.3	21577.3	7.81203	8	51.3402	50295.5	50295.5	6.61648	1129	1338748	1338748	7	59.0362	21813.7	21813.7	6.38847	6	-30.9638	44137.3	44137.3	5.1728	6	-68.1986	26065.3	26065.3	5.36773	8	45	14174.4	14174.4	6.73842
17.2	8	-51.3402	20769.2	20769.2	6.54074	8	0	29383.1	29383.1	6.66876	9	-39.8056	20810.1	20810.1	7.81203	8	51.3402	57919.8	57919.8	6.61648	1129	1.33272e+06	1.33272e+06	7	59.0362	20389.1	20389.1	6.38847	6	-30.9638	39330.7	39330.7	5.1728	6	-68.1986	21750.2	21750.2	5.36773	8	45	15202.5	15202.5	6.73842
17.4	8	-51.3402	21917.3	21917.3	6.54074	8	0	27688.4	27688.4	6.66876	9	-39.8056	23518.3	23518.3	7.81203	8	51.3402	58923.3	58923.3	6.61648	1129	1.34608e+06	1.34608e+06	7	59.0362	20561	20561	6.38847	6	-30.9638	36867.3	36867.3	5.1728	6	-68.1986	18433.7	18433.7	5.36773	8	45	17739.7	17739.7	6.73842
17.6	8	-51.3402	26449.9	26449.9	6.54074	8	0	28167.6	28167.6	6.66876	9	-39.8056	20842.1	20842.1	7.81203	8	51.3402	56337.7	56337.7	6.61648	1129	1.36348e+06	1.36348e+06	7	59.0362	22102	22102	6.38847	6	-30.9638	26546	26546	5.1728	6	-68.1986	14154.1	14154.1	5.36773	8	45	19013.7	19013.7	6.73842
17.8	8	-51.3402	27115.1	27115.1	6.54074	8	0	25305.3	25305.3	6.66876	9	-39.8056	21449.3	21449.3	7.81203	8	51.3402	60679.7	60679.7	6.61648	1129	1.40107e+06	1.40107e+06	7	59.0362	20267.2	20267.2	6.38847	6	-30.9638	29869.8	29869.8	5.1728	6	-68.1986	17469.3	17469.3	5.36773	8	45	15799.8	15799.8	6.73842
18	8	-51.3402	30172.6	30172.6	6.54074	8	0	26026	26026	6.66876	9	-39.8056	18944.7	18944.7	7.81203	8	51.3402	47127.2	47127.2	6.61648	1129	1.32443e+06	1.32443e+06	7	59.0362	17222.7	17222.7	6.38847	6	-30.9638	29916.3	29916.3	5.1728	6	-68.1986	13900.1	13900.1	5.36773	8	45	16566.8	16566.8	6.73842
18.2	8	-51.3402	30228.9	30228.9	6.54074	8	0	23185.4	23185.4	6.66876	9	-39.8056	21463.2	21463.2	7.81203	8	51.3402	46622.6	46622.6	6.61648	1129	1.33109e+06	1.33109e+06	7	59.0362	16863.9	16863.9	6.38847	6	-30.9638	31254	31254	5.1728	6	-68.1986	14481.9	14481.9	5.36773	8	45	12033.3	12033.3	6.73842
18.4	8	-51.3402	31011.3	31011.3	6.54074	8	0	25143.4	25143.4	6.66876	9	-39.8056	21389	21389	7.81203	8	51.3402	48793.3	48793.3	6.61648	1129	1.43204e+06	1.43204e+06	7	59.0362	17073.1	17073.1	6.38847	6	-30.9638	28888.9	28888.9	5.1728	6	-68.1986	23058.1	23058.1	5.36773	8	45	16009.3	16009.3	6.73842
18.6	8	-51.3402	30236.8	30236.8	6.54074	8	0	19132	19132	6.66876	9	-39.8056	23045.2	23045.2	7.81203	8	51.3402	40716.8	40716.8	6.61648	1129	1.38486e+06	1.38486e+06	7	59.0362	22769.4	22769.4	6.38847	6	-30.9638	27426.4	27426.4	5.1728	6	-68.1986	22825.4	22825.4	5.36773	8	45	13176.4	13176.4	6.73842
18.8	8	-51.3402	34681.3	34681.3	6.54074	8	0	22510.2	22510.2	6.66876	9	-39.8056	19281.4	19281.4	7.81203	8	51.3402	32068.3	32068.3	6.61648	1129	1.37613e+06	1.37613e+06	7	59.0362	17968	17968	6.38847	6	-30.9638	25283.2	25283.2	5.1728	6	-68.1986	24904.8	24904.8	5.36773	8	45	12939.2	12939.2	6.73842
19	8	-51.3402	36246.8	36246.8	6.54074	8	0	16403.5	16403.5	6.66876	9	-39.8056	20133.7	20133.7	7.81203	8	51.3402	39271.3	39271.3	6.61648	1129	1380542	1380542	7	59.0362	20317.6	20317.6	6.38847	6	-30.9638	20032.1	20032.1	5.1728	6	-68.1986	30507.8	30507.8	5.36773	8	45	14943.3	14943.3	6.73842
19.2	8	-51.3402	38589	38589	6.54074	8	0	15056.8	15056.8	6.66876	9	-39.8056	21142.2	21142.2	7.81203	8	51.3402	30009.8	30009.8	6.61648	1129	1.38857e+06	1.38857e+06	7	59.0362	19610.1	19610.1	6.38847	6	-30.9638	18648.1	18648.1	5.1728	6	-68.1986	27284.4	27284.4	5.36773	8	45	20184	20184	6.73842
19.4	8	-51.3402	32221.3	32221.3	6.54074	8	0	13110.2	13110.2	6.66876	9	-39.8056	25460.1	25460.1	7.81203	8	51.3402	31191.8	31191.8	6.61648	1129	1.36362e+06	1.36362e+06	7	59.0362	14421.4	14421.4	6.38847	6	-30.9638	23114.2	23114.2	5.1728	6	-68.1986	23136.8	23136.8	5.36773	8	45	16825.7	16825.7	6.73842
19.6	8	-51.3402	28588.7	28588.7	6.54074	8	0	15430.1	15430.1	6.66876	9	-39.8056	23885.6	23885.6	7.81203	8	51.3402	22977.7	22977.7	6.61648	1129	1.38951e+06	1.38951e+06	7	59.0362	16424.1	16424.1	6.38847	6	-30.9638	22455.1	22455.1	5.1728	6	-68.1986	19842.7	19842.7	5.36773	8	45	13171.9	13171.9	6.73842
19.8	8	-51.3402	25700.8	25700.8	6.54074	8	0	14210	14210	6.66876	9	-39.8056	17953.4	17953.4	7.81203	8	51.3402	29735.9	29735.9	6.61648	1129	1.35434e+06	1.35434e+06	7	59.0362	12219.8	12219.8	6.38847	6	-30.9638	24031.8	24031.8	5.1728	6	-68.1986	19860.6	19860.6	5.36773	8	45	12546.7	12546.7	6.73842
20	8	-51.3402	24664.8	24664.8	6.54074	8	0	14085.2	14085.2	6.66876	9	-39.8056	13793.4	13793.4	7.81203	8	51.3402	31004.1	31004.1	6.61648	1129	1.40983e+06	1.40983e+06	7	59.0362	15081.3	15081.3	6.38847	6	-30.9638	20969.6	20969.6	5.1728	6	-68.1986	23785.1	23785.1	5.36773	8	45	13588.6	13588.6	6.73842
20.2	8	-51.3402	27468.3	27468.3	6.54074	8	0	13061	13061	6.66876	9	-39.8056	21746.2	21746.2	7.81203	8	51.3402	28936.9	28936.9	6.61648	1129	1.34462e+06	1.34462e+06	7	59.0362	17558.2	17558.2	6.38847	6	-30.9638	23931.5	23931.5	5.1728	6	-68.1986	23213.5	23213.5	5.36773	8	45	18781.6	18781.6	6.73842
20.4	8	-51.3402	28240.3	28240.3	6.54074	8	0	13074.6	13074.6	6.66876	9	-39.8056	19003.6	19003.6	7.81203	8	51.3402	30901.8	30901.8	6.61648	1129	1.31243e+06	1.31243e+06	7	59.0362	16141.4	16141.4	6.38847	6	-30.9638	22976.6	22976.6	5.1728	6	-68.1986	18614.9	18614.9	5.36773	8	45	16122.2	16122.2	6.73842
20.6	8	-51.3402	30540.4	30540.4	6.54074	8	0	17514.4	17514.4	6.66876	9	-39.8056	17936.2	17936.2	7.81203	8	51.3402	28467	28467	6.61648	1129	1.34826e+06	1.34826e+06	7	59.0362	18129.7	18129.7	6.38847	6	-30.9638	28693.1	28693.1	5.1728	6	-68.1986	19930.3	19930.3	5.36773	8	45	16683.5	16683.5	6.73842
20.8	8	-51.3402	33944.1	33944.1	6.54074	8	0	17377.8	17377.8	6.66876	9	-39.8056	23552.7	23552.7	7.81203	8	51.3402	32582.1	32582.1	6.61648	1129	1.38519e+06	1.38519e+06	7	59.0362	20288.1	20288.1	6.38847	6	-30.9638	33632.5	33632.5	5.1728	6	-68.1986	20790.4	20790.4	5.36773	8	45	15290.4	15290.4	6.73842
21	8	-51.3402	29334.6	29334.6	6.54074	8	0	12239.5	12239.5	6.66876	9	-39.8056	18462.5	18462.5	7.81203	8	51.3402	31698	31698	6.61648	1129	1.33258e+06	1.33258e+06	7	59.0362	14841.8	14841.8	6.38847	6	-30.9638	31653.1	31653.1	5.1728	6	-68.1986	20720.1	20720.1	5.36773	8	45	18806.7	18806.7	6.73842
21.2	8	-51.3402	32185.7	32185.7	6.54074	8	0	17092.6	17092.6	6.66876	9	-39.8056	18104.4	18104.4	7.81203	8	51.3402	24495.3	24495.3	6.61648	1129	1.37083e+06	1.37083e+06	7	59.0362	14884.4	14884.4	6.38847	6	-30.9638	31948.2	31948.2	5.1728	6	-68.1986	21747.4	21747.4	5.36773	8	45	16425.8	16425.8	6.73842
21.4	8	-51.3402	27688.2	27688.2	6.54074	8	0	15397.2	15397.2	6.66876	9	-39.8056	22310.5	22310.5	7.81203	8	51.3402	23245.7	23245.7	6.61648	1129	1.31757e+06	1.31757e+06	7	59.0362	13876.8	13876.8	6.38847	6	-30.9638	31848.3	31848.3	5.1728	6	-68.1986	23204.6	23204.6	5.36773	8	45	15739.2	15739.2	6.73842
21.6	8	-51.3402	29811	29811	6.54074	8	0	17930.5	17930.5	6.66876	9	-39.8056	24137.7	24137.7	7.81203	8	51.3402	24609.5	24609.5	6.61648	1129	1.39718e+06	1.39718e+06	7	59.0362	14100.3	14100.3	6.38847	6	-30.9638	30502.4	30502.4	5.1728	6	-68.1986	21737.8	21737.8	5.36773	8	45	14075.3	14075.3	6.73842
21.8	8	-51.3402	25970	25970	6.54074	8	0	13919.4	13919.4	6.66876	9	-39.8056	24177.8	24177.8	7.81203	8	51.3402	35355.2	35355.2	6.61648	1129	1383900	1383900	7	59.0362	15443	15443	6.38847	6	-30.9638	34944.1	34944.1	5.1728	6	-68.1986	26344.6	26344.6	5.36773	8	45	17781.9	17781.9	6.73842
22	8	-51.3402	26431.5	26431.5	6.54074	8	0	16328.1	16328.1	6.66876	9	-39.8056	21891.4	21891.4	7.81203	8	51.3402	33194.1	33194.1	6.61648	1129	1.32752e+06	1.32752e+06	7	59.0362	18117.4	18117.4	6.38847	6	-30.9638	30924.8	30924.8	5.1728	6	-68.1986	27862.5	27862.5	5.36773	8	45	13302.2	13302.2	6.73842
22.2	8	-51.3402	25462.6	25462.6	6.54074	8	0	16001.9	16001.9	6.66876	9	-39.8056	20590.1	20590.1	7.81203	8	51.3402	23287.2	23287.2	6.61648	1129	1.38455e+06	1.38455e+06	7	59.0362	24243.9	24243.9	6.38847	6	-30.9638	27000.2	27000.2	5.1728	6	-68.1986	25470.5	25470.5	5.36773	8	45	15803.4	15803.4	6.73842
22.4	8	-51.3402	26151.1	26151.1	6.54074	8	0	19353	19353	6.66876	9	-39.8056	25593	25593	7.81203	8	51.3402	25830.7	25830.7	6.61648	1129	1.42926e+06	1.42926e+06	7	59.0362	20572.9	20572.9	6.38847	6	-30.9638	29601.4	29601.4	5.1728	6	-68.1986	24447.3	24447.3	5.36773	8	45	13673.5	13673.5	6.73842
22.6	8	-51.3402	31284.9	31284.9	6.54074	8	0	18939.9	18939.9	6.66876	9	-39.8056	15781.1	15781.1	7.81203	8	51.3402	20543.3	20543.3	6.61648	1129	1332079	1332079	7	59.0362	25325	25325	6.38847	6	-30.9638	24720.3	24720.3	5.1728	6	-68.1986	28576.2	28576.2	5.36773	8	45	13325.2	13325.2	6.73842
22.8	8	-51.3402	25162.8	25162.8	6.54074	8	0	17147.8	17147.8	6.66876	9	-39.8056	19607.2	19607.2	7.81203	8	51.3402	21211.9	21211.9	6.61648	1129	1389038	1389038	7	59.0362	31274.3	31274.3	6.38847	6	-30.9638	31154.6	31154.6	5.1728	6	-68.1986	27167.7	27167.7	5.36773	8	45	13047.5	13047.5	6.73842
23	8	-51.3402	31628.6	31628.6	6.54074	8	0	19079.5	19079.5	6.66876	9	-39.8056	19187.2	19187.2	7.81203	8	51.3402	30621.1	30621.1	6.61648	1129	1.3369e+06	1.3369e+06	7	59.0362	31598.3	31598.3	6.38847	6	-30.9638	25353.4	25353.4	5.1728	6	-68.1986	39841.4	39841.4	5.36773	8	45	13888.8	13888.8	6.73842
23.2	8	-51.3402	29516.2	29516.2	6.54074	8	0	17602.8	17602.8	6.66876	9	-39.8056	16414.5	16414.5	7.81203	8	51.3402	24712.3	24712.3	6.61648	1129	1.38649e+06	1.38649e+06	7	59.0362	37550.2	37550.2	6.38847	6	-30.9638	26757.9	26757.9	5.1728	6	-68.1986	41506.3	41506.3	5.36773	8	45	18027.9	18027.9	6.73842
23.4	8	-51.3402	29985.6	29985.6	6.54074	8	0	18947.3	18947.3	6.66876	9	-39.8056	19176.6	19176.6	7.81203	8	51.3402	26987.2	26987.2	6.61648	1129	1.37217e+06	1.37217e+06	7	59.0362	33139.4	33139.4	6.38847	6	-30.9638	29698.1	29698.1	5.1728	6	-68.1986	28024.5	28024.5	5.36773	8	45	18114.6	18114.6	6.73842
23.6	8	-51.3402	33321.1	33321.1	6.54074	8	0	17944	17944	6.66876	9	-39.8056	18532.8	18532.8	7.81203	8	51.3402	28577.2	28577.2	6.61648	1129	1.32394e+06	1.32394e+06	7	59.0362	35480.5	35480.5	6.38847	6	-30.9638	27249.6	27249.6	5.1728	6	-68.1986	22216.7	22216.7	5.36773	8	45	16736.3	16736.3	6.73842
23.8	8	-51.3402	26014.3	26014.3	6.54074	8	0	20896.9	20896.9	6.66876	9	-39.8056	17998.9	17998.9	7.81203	8	51.3402	23121	23121	6.61648	1129	1.42697e+06	1.42697e+06	7	59.0362	27116.7	27116.7	6.38847	6	-30.9638	29383.3	29383.3	5.1728	6	-68.1986	26665.6	26665.6	5.36773	8	45	13744.6	13744.6	6.73842
24	8	-51.3402	29656.5	29656.5	6.54074	8	0	20449.5	20449.5	6.66876	9	-39.8056	20912.7	20912.7	7.81203	8	51.3402	20330.9	20330.9	6.61648	1129	1.40442e+06	1.40442e+06	7	59.0362	22545.6	22545.6	6.38847	6	-30.9638	30254.6	30254.6	5.1728	6	-68.1986	24939.5	24939.5	5.36773	8	45	13835.5	13835.5	6.73842
24.2	8	-51.3402	27846.9	27846.9	6.54074	8	0	18125.7	18125.7	6.66876	9	-39.8056	15270.4	15270.4	7.81203	8	51.3402	26184.4	26184.4	6.61648	1129	1374959	1374959	7	59.0362	21906.3	21906.3	6.38847	6	-30.9638	27475.7	27475.7	5.1728	6	-68.1986	30514.5	30514.5	5.36773	8	45	13341.2	13341.2	6.73842
24.4	8	-51.3402	24481.6	24481.6	6.54074	8	0	21871.3	21871.3	6.66876	9	-39.8056	22485.4	22485.4	7.81203	8	51.3402	22888.1	22888.1	6.61648	1129	1.36812e+06	1.36812e+06	7	59.0362	18483.6	18483.6	6.38847	6	-30.9638	33811.1	33811.1	5.1728	6	-68.1986	34570.7	34570.7	5.36773	8	45	13197	13197	6.73842
24.6	8	-51.3402	34622.4	34622.4	6.54074	8	0	23502.9	23502.9	6.66876	9	-39.8056	21228.9	21228.9	7.81203	8	51.3402	21910.5	21910.5	6.61648	1129	1.40376e+06	1.40376e+06	7	59.0362	20119.5	20119.5	6.38847	6	-30.9638	38484.6	38484.6	5.1728	6	-68.1986	30643.2	30643.2	5.36773	8	45	13056.7	13056.7	6.73842
24.8	8	-51.3402	30245.6	30245.6	6.54074	8	0	15940	15940	6.66876	9	-39.8056	16245.7	16245.7	7.81203	8	51.3402	23628.3	23628.3	6.61648	1129	1.43106e+06	1.43106e+06	7	59.0362	16607.5	16607.5	6.38847	6	-30.9638	29373.3	29373.3	5.1728	6	-68.1986	42047.3	42047.3	5.36773	8	45	11016.1	11016.1	6.73842
25	8	-51.3402	34170.6	34170.6	6.54074	8	0	18650.4	18650.4	6.66876	9	-39.8056	19725.5	19725.5	7.81203	8	51.3402	24970.7	24970.7	6.61648	1129	1.33876e+06	1.33876e+06	7	59.0362	23553.1	23553.1	6.38847	6	-30.9638	28276.6	28276.6	5.1728	6	-68.1986	36312.5	36312.5	5.36773	8	45	18275.3	18275.3	6.73842
25.2	8	-51.3402	29231.2	29231.2	6.54074	8	0	21366.3	21366.3	6.66876	9	-39.8056	18024.7	18024.7	7.81203	8	51.3402	27332.5	27332.5	6.61648	1129	1.36282e+06	1.36282e+06	7	59.0362	20274.5	20274.5	6.38847	6	-30.9638	23055	23055	5.1728	6	-68.1986	28986.8	28986.8	5.36773	8	45	13317.3	13317.3	6.73842
25.4	8	-51.3402	28143.9	28143.9	6.54074	8	0	16209.7	16209.7	6.66876	9	-39.8056	14337.9	14337.9	7.81203	8	51.3402	24584.8	24584.8	6.61648	1129	1.32138e+06	1.32138e+06	7	59.0362	14229.7	14229.7	6.38847	6	-30.9638	23330.6	23330.6	5.1728	6	-68.1986	22670.4	22670.4	5.36773	8	45	13560.3	13560.3	6.73842
25.6	8	-51.3402	28758.4	28758.4	6.54074	8	0	17045.3	17045.3	6.66876	9	-39.8056	21143.2	21143.2	7.81203	8	51.3402	27889.4	27889.4	6.61648	1129	1.41914e+06	1.41914e+06	7	59.0362	12161.8	12161.8	6.38847	6	-30.9638	23952.2	23952.2	5.1728	6	-68.1986	23993.9	23993.9	5.36773	8	45	18437.6	18437.6	6.73842
25.8	8	-51.3402	33926.8	33926.8	6.54074	8	0	15666.5	15666.5	6.66876	9	-39.8056	21183.4	21183.4	7.81203	8	51.3402	22048.8	22048.8	6.61648	1129	1.38607e+06	1.38607e+06	7	59.0362	15771	15771	6.38847	6	-30.9638	24651.6	24651.6	5.1728	6	-68.1986	19811.3	19811.3	5.36773	8	45	15500.7	15500.7	6.73842
26	8	-51.3402	25441.7	25441.7	6.54074	8	0	18966.5	18966.5	6.66876	9	-39.8056	16582.4	16582.4	7.81203	8	51.3402	24671.4	24671.4	6.61648	1129	1.35724e+06	1.35724e+06	7	59.0362	16750.4	16750.4	6.38847	6	-30.9638	25606.7	25606.7	5.1728	6	-68.1986	18439	18439	5.36773	8	45	15325.8	15325.8	6.73842
26.2	8	-51.3402	30115.9	30115.9	6.54074	8	0	17294.1	17294.1	6.66876	9	-39.8056	22986.3	22986.3	7.81203	8	51.3402	24616.3	24616.3	6.61648	1129	1.3807e+06	1.3807e+06	7	59.0362	14201.3	14201.3	6.38847	6	-30.9638	26457.8	26457.8	5.1728	6	-68.1986	22567.8	22567.8	5.36773	8	45	19279.8	19279.8	6.73842
26.4	8	-51.3402	37784	37784	6.54074	8	0	17526.5	17526.5	6.66876	9	-39.8056	20617	20617	7.81203	8	51.3402	40091	40091	6.61648	1129	1.3532e+06	1.3532e+06	7	59.0362	14165.9	14165.9	6.38847	6	-30.9638	25829.9	25829.9	5.1728	6	-68.1986	21207.4	21207.4	5.36773	8	45	14712.8	14712.8	6.73842
26.6	8	-51.3402	32976.9	32976.9	6.54074	8	0	13728.2	13728.2	6.66876	9	-39.8056	24111.4	24111.4	7.81203	8	51.3402	53888.9	53888.9	6.61648	1129	1.37145e+06	1.37145e+06	7	59.0362	15570.9	15570.9	6.38847	6	-30.9638	26392.7	26392.7	5.1728	6	-68.1986	25899.1	25899.1	5.36773	8	45	19250.4	19250.4	6.73842
26.8	8	-51.3402	33298.9	33298.9	6.54074	8	0	13801.2	13801.2	6.66876	9	-39.8056	13326	13326	7.81203	8	51.3402	61133.8	61133.8	6.61648	1129	1.41276e+06	1.41276e+06	7	59.0362	19047	19047	6.38847	6	-30.9638	37503.8	37503.8	5.1728	6	-68.1986	27050.5	27050.5	5.36773	8	45	16624.1	16624.1	6.73842
27	8	-51.3402	29874.7	29874.7	6.54074	8	0	17237.3	17237.3	6.66876	9	-39.8056	20597.7	20597.7	7.81203	8	51.3402	65931.4	65931.4	6.61648	1129	1.45718e+06	1.45718e+06	7	59.0362	20067.6	20067.6	6.38847	6	-30.9638	33161	33161	5.1728	6	-68.1986	27051.6	27051.6	5.36773	8	45	15792.1	15792.1	6.73842
27.2	8	-51.3402	30095.9	30095.9	6.54074	8	0	14609	14609	6.66876	9	-39.8056	16324	16324	7.81203	8	51.3402	65236.7	65236.7	6.61648	1129	1.44097e+06	1.44097e+06	7	59.0362	14014.8	14014.8	6.38847	6	-30.9638	24055	24055	5.1728	6	-68.1986	19649.8	19649.8	5.36773	8	45	17852.7	17852.7	6.73842
27.4	8	-51.3402	27296.2	27296.2	6.54074	8	0	15602.6	15602.6	6.66876	9	-39.8056	16965.1	16965.1	7.81203	8	51.3402	57887.6	57887.6	6.61648	1129	1.38209e+06	1.38209e+06	7	59.0362	14731.3	14731.3	6.38847	6	-30.9638	28716.7	28716.7	5.1728	6	-68.1986	18154.8	18154.8	5.36773	8	45	18824.9	18824.9	6.73842
27.6	8	-51.3402	27227.5	27227.5	6.54074	8	0	13798.4	13798.4	6.66876	9	-39.8056	17781.4	17781.4	7.81203	8	51.3402	57363.1	57363.1	6.61648	1129	1.37951e+06	1.37951e+06	7	59.0362	12899.2	12899.2	6.38847	6	-30.9638	23674.7	23674.7	5.1728	6	-68.1986	24061.5	24061.5	5.36773	8	45	18854.4	18854.4	6.73842
27.8	8	-51.3402	26873.6	26873.6	6.54074	8	0	14899.8	14899.8	6.66876	9	-39.8056	17577.1	17577.1	7.81203	8	51.3402	59705.2	59705.2	6.61648	1129	1.35945e+06	1.35945e+06	7	59.0362	13105.1	13105.1	6.38847	6	-30.9638	35555.8	35555.8	5.1728	6	-68.1986	19996.3	19996.3	5.36773	8	45	17939	17939	6.73842
28	8	-51.3402	33875.4	33875.4	6.54074	8	0	16428.6	16428.6	6.66876	9	-39.8056	19839	19839	7.81203	8	51.3402	59020.7	59020.7	6.61648	1129	1.40638e+06	1.40638e+06	7	59.0362	11869.9	11869.9	6.38847	6	-30.9638	34306.8	34306.8	5.1728	6	-68.1986	20236.7	20236.7	5.36773	8	45	15500.8	15500.8	6.73842
28.2	8	-51.3402	28218.1	28218.1	6.54074	8	0	10223.8	10223.8	6.66876	9	-39.8056	17130.4	17130.4	7.81203	8	51.3402	60579.3	60579.3	6.61648	1129	1.37611e+06	1.37611e+06	7	59.0362	13227.5	13227.5	6.38847	6	-30.9638	34862.8	34862.8	5.1728	6	-68.1986	19315.8	19315.8	5.36773	8	45	17202.1	17202.1	6.73842
28.4	8	-51.3402	26196.6	26196.6	6.54074	8	0	16268.5	16268.5	6.66876	9	-39.8056	19113.8	19113.8	7.81203	8	51.3402	46527.5	46527.5	6.61648	1129	1.44212e+06	1.44212e+06	7	59.0362	11690.3	11690.3	6.38847	6	-30.9638	32666.6	32666.6	5.1728	6	-68.1986	19600	19600	5.36773	8	45	17701.7	17701.7	6.73842
28.6	8	-51.3402	31091.2	31091.2	6.54074	8	0	12453.9	12453.9	6.66876	9	-39.8056	19470.8	19470.8	7.81203	8	51.3402	43679.1	43679.1	6.61648	1129	1.39778e+06	1.39778e+06	7	59.0362	9159.61	9159.61	6.38847	6	-30.9638	29474.1	29474.1	5.1728	6	-68.1986	16388.6	16388.6	5.36773	8	45	17370.9	17370.9	6.73842
28.8	8	-51.3402	31029.3	31029.3	6.54074	8	0	13875.9	13875.9	6.66876	9	-39.8056	23504.3	23504.3	7.81203	8	51.3402	35846.6	35846.6	6.61648	1129	1.41147e+06	1.41147e+06	7	59.0362	15930.5	15930.5	6.38847	6	-30.9638	31700.3	31700.3	5.1728	6	-68.1986	15583.1	15583.1	5.36773	8	45	21886.9	21886.9	6.73842
29	8	-51.3402	27407.9	27407.9	6.54074	8	0	14974.6	14974.6	6.66876	9	-39.8056	17014.2	17014.2	7.81203	8	51.3402	32500.4	32500.4	6.61648	1129	1334915	1334915	7	59.0362	35271.2	35271.2	6.38847	6	-30.9638	28639.4	28639.4	5.1728	6	-68.1986	15693.4	15693.4	5.36773	8	45	15051.3	15051.3	6.73842
29.2	8	-51.3402	28573.6	28573.6	6.54074	8	0	18958.2	18958.2	6.66876	9	-39.8056	16880.4	16880.4	7.81203	8	51.3402	32809.7	32809.7	6.61648	1129	1404539	1404539	7	59.0362	32923.6	32923.6	6.38847	6	-30.9638	30196.8	30196.8	5.1728	6	-68.1986	20040	20040	5.36773	8	45	17636.4	17636.4	6.73842
29.4	8	-51.3402	29902.5	29902.5	6.54074	8	0	18568.8	18568.8	6.66876	9	-39.8056	17331.5	17331.5	7.81203	8	51.3402	35405.6	35405.6	6.61648	1129	1405461	1405461	7	59.0362	31528	31528	6.38847	6	-30.9638	28680.6	28680.6	5.1728	6	-68.1986	16127.7	16127.7	5.36773	8	45	17094.5	17094.5	6.73842
29.6	8	-51.3402	33238.4	33238.4	6.54074	8	0	18073	18073	6.66876	9	-39.8056	18602.2	18602.2	7.81203	8	51.3402	32297.2	32297.2	6.61648	1129	1.36101e+06	1.36101e+06	7	59.0362	20600.2	20600.2	6.38847	6	-30.9638	27403.6	27403.6	5.1728	6	-68.1986	21552.4	21552.4	5.36773	8	45	16250.3	16250.3	6.73842
29.8	8	-51.3402	31339.5	31339.5	6.54074	8	0	17159.2	17159.2	6.66876	9	-39.8056	19239.1	19239.1	7.81203	8	51.3402	33742.4	33742.4	6.61648	1129	1405856	1405856	7	59.0362	26699.5	26699.5	6.38847	6	-30.9638	27229.7	27229.7	5.1728	6	-68.1986	16701.9	16701.9	5.36773	8	45	14456.2	14456.2	6.73842
30	8	-51.3402	32677.7	32677.7	6.54074	8	0	18629.2	18629.2	6.66876	9	-39.8056	20030.5	20030.5	7.81203	8	51.3402	34508.8	34508.8	6.61648	1129	1.33731e+06	1.33731e+06	7	59.0362	21122.2	21122.2	6.38847	6	-30.9638	30630.5	30630.5	5.1728	6	-68.1986	16667.5	16667.5	5.36773	8	45	12511.6	12511.6	6.73842
		Background value for each axon
Time (s)	Axon1	Axon2	Axon3	Axon4	Axon6	Axon7	Axon8	Axon9
0	12084.8	12084.8	13595.4	12084.8	10574.2	9063.57	9063.57	12084.8
0.2	9007.18	9007.18	10133.1	9007.18	7881.29	6755.39	6755.39	9007.18
0.4	9299.26	9299.26	10461.7	9299.26	8136.85	6974.44	6974.44	9299.26
0.6	9477.18	9477.18	10661.8	9477.18	8292.53	7107.88	7107.88	9477.18
0.8	9541.91	9541.91	10734.6	9541.91	8349.17	7156.43	7156.43	9541.91
1	9139.23	9139.23	10281.6	9139.23	7996.82	6854.42	6854.42	9139.23
1.2	9461.91	9461.91	10644.6	9461.91	8279.17	7096.43	7096.43	9461.91
1.4	8852.25	8852.25	9958.78	8852.25	7745.71	6639.18	6639.18	8852.25
1.6	9400.6	9400.6	10575.7	9400.6	8225.53	7050.45	7050.45	9400.6
1.8	9109.57	9109.57	10248.3	9109.57	7970.88	6832.18	6832.18	9109.57
2	9256.11	9256.11	10413.1	9256.11	8099.09	6942.08	6942.08	9256.11
2.2	9263.34	9263.34	10421.3	9263.34	8105.42	6947.5	6947.5	9263.34
2.4	9290.82	9290.82	10452.2	9290.82	8129.47	6968.12	6968.12	9290.82
2.6	9017.02	9017.02	10144.2	9017.02	7889.9	6762.77	6762.77	9017.02
2.8	9271.43	9271.43	10430.4	9271.43	8112.5	6953.57	6953.57	9271.43
3	9399.78	9399.78	10574.8	9399.78	8224.81	7049.84	7049.84	9399.78
3.2	9663.92	9663.92	10871.9	9663.92	8455.93	7247.94	7247.94	9663.92
3.4	9173.2	9173.2	10319.9	9173.2	8026.55	6879.9	6879.9	9173.2
3.6	9473.09	9473.09	10657.2	9473.09	8288.95	7104.82	7104.82	9473.09
3.8	9062.25	9062.25	10195	9062.25	7929.47	6796.69	6796.69	9062.25
4	9528.13	9528.13	10719.2	9528.13	8337.12	7146.1	7146.1	9528.13
4.2	8979.89	8979.89	10102.4	8979.89	7857.4	6734.91	6734.91	8979.89
4.4	9114.85	9114.85	10254.2	9114.85	7975.5	6836.14	6836.14	9114.85
4.6	9539.73	9539.73	10732.2	9539.73	8347.26	7154.79	7154.79	9539.73
4.8	9549.91	9549.91	10743.6	9549.91	8356.17	7162.43	7162.43	9549.91
5	9288.48	9288.48	10449.5	9288.48	8127.42	6966.36	6966.36	9288.48
5.2	9007.65	9007.65	10133.6	9007.65	7881.69	6755.74	6755.74	9007.65
5.4	9396.87	9396.87	10571.5	9396.87	8222.26	7047.65	7047.65	9396.87
5.6	9452.39	9452.39	10633.9	9452.39	8270.84	7089.29	7089.29	9452.39
5.8	9732.89	9732.89	10949.5	9732.89	8516.28	7299.67	7299.67	9732.89
6	9260.28	9260.28	10417.8	9260.28	8102.74	6945.21	6945.21	9260.28
6.2	9323.91	9323.91	10489.4	9323.91	8158.43	6992.94	6992.94	9323.91
6.4	9505.53	9505.53	10693.7	9505.53	8317.34	7129.15	7129.15	9505.53
6.6	9083.28	9083.28	10218.7	9083.28	7947.87	6812.46	6812.46	9083.28
6.8	9352.02	9352.02	10521	9352.02	8183.01	7014.01	7014.01	9352.02
7	9702.28	9702.28	10915.1	9702.28	8489.49	7276.71	7276.71	9702.28
7.2	9512.09	9512.09	10701.1	9512.09	8323.07	7134.06	7134.06	9512.09
7.4	9255.92	9255.92	10412.9	9255.92	8098.93	6941.94	6941.94	9255.92
7.6	9389.21	9389.21	10562.9	9389.21	8215.55	7041.9	7041.9	9389.21
7.8	9390.38	9390.38	10564.2	9390.38	8216.58	7042.79	7042.79	9390.38
8	9706.88	9706.88	10920.2	9706.88	8493.52	7280.16	7280.16	9706.88
8.2	9281.14	9281.14	10441.3	9281.14	8121	6960.85	6960.85	9281.14
8.4	9411.85	9411.85	10588.3	9411.85	8235.37	7058.89	7058.89	9411.85
8.6	9417.8	9417.8	10595	9417.8	8240.57	7063.35	7063.35	9417.8
8.8	9725.29	9725.29	10940.9	9725.29	8509.63	7293.97	7293.97	9725.29
9	9521.43	9521.43	10711.6	9521.43	8331.25	7141.07	7141.07	9521.43
9.2	9398.1	9398.1	10572.9	9398.1	8223.34	7048.58	7048.58	9398.1
9.4	9324.47	9324.47	10490	9324.47	8158.91	6993.35	6993.35	9324.47
9.6	9950.55	9950.55	11194.4	9950.55	8706.73	7462.91	7462.91	9950.55
9.8	9721.91	9721.91	10937.1	9721.91	8506.67	7291.43	7291.43	9721.91
10	9333.38	9333.38	10500.1	9333.38	8166.71	7000.04	7000.04	9333.38
10.2	9266.36	9266.36	10424.7	9266.36	8108.06	6949.77	6949.77	9266.36
10.4	9778.42	9778.42	11000.7	9778.42	8556.12	7333.81	7333.81	9778.42
10.6	9514	9514	10703.2	9514	8324.75	7135.5	7135.5	9514
10.8	9595.17	9595.17	10794.6	9595.17	8395.77	7196.37	7196.37	9595.17
11	9346.11	9346.11	10514.4	9346.11	8177.84	7009.58	7009.58	9346.11
11.2	9213.89	9213.89	10365.6	9213.89	8062.16	6910.42	6910.42	9213.89
11.4	9397.59	9397.59	10572.3	9397.59	8222.89	7048.19	7048.19	9397.59
11.6	9878.64	9878.64	11113.5	9878.64	8643.81	7408.98	7408.98	9878.64
11.8	9514.8	9514.8	10704.2	9514.8	8325.45	7136.1	7136.1	9514.8
12	9564.21	9564.21	10759.7	9564.21	8368.69	7173.16	7173.16	9564.21
12.2	9525.05	9525.05	10715.7	9525.05	8334.42	7143.79	7143.79	9525.05
12.4	9714.57	9714.57	10928.9	9714.57	8500.25	7285.93	7285.93	9714.57
12.6	9526.94	9526.94	10717.8	9526.94	8336.07	7145.2	7145.2	9526.94
12.8	9680.55	9680.55	10890.6	9680.55	8470.48	7260.41	7260.41	9680.55
13	9161.31	9161.31	10306.5	9161.31	8016.14	6870.98	6870.98	9161.31
13.2	9541.74	9541.74	10734.5	9541.74	8349.02	7156.31	7156.31	9541.74
13.4	9320.27	9320.27	10485.3	9320.27	8155.24	6990.2	6990.2	9320.27
13.6	9801.98	9801.98	11027.2	9801.98	8576.73	7351.49	7351.49	9801.98
13.8	9394.22	9394.22	10568.5	9394.22	8219.94	7045.66	7045.66	9394.22
14	9506.71	9506.71	10695	9506.71	8318.37	7130.03	7130.03	9506.71
14.2	9627.15	9627.15	10830.5	9627.15	8423.76	7220.37	7220.37	9627.15
14.4	9991.19	9991.19	11240.1	9991.19	8742.29	7493.39	7493.39	9991.19
14.6	9133.11	9133.11	10274.7	9133.11	7991.47	6849.83	6849.83	9133.11
14.8	9822.03	9822.03	11049.8	9822.03	8594.28	7366.53	7366.53	9822.03
15	9732.4	9732.4	10948.9	9732.4	8515.85	7299.3	7299.3	9732.4
15.2	9843.81	9843.81	11074.3	9843.81	8613.33	7382.86	7382.86	9843.81
15.4	9526.37	9526.37	10717.2	9526.37	8335.58	7144.78	7144.78	9526.37
15.6	9221.61	9221.61	10374.3	9221.61	8068.91	6916.21	6916.21	9221.61
15.8	9428.26	9428.26	10606.8	9428.26	8249.72	7071.19	7071.19	9428.26
16	9775.97	9775.97	10998	9775.97	8553.97	7331.97	7331.97	9775.97
16.2	9760.7	9760.7	10980.8	9760.7	8540.61	7320.53	7320.53	9760.7
16.4	9802.38	9802.38	11027.7	9802.38	8577.08	7351.78	7351.78	9802.38
16.6	9744.05	9744.05	10962.1	9744.05	8526.04	7308.03	7308.03	9744.05
16.8	10161.2	10161.2	11431.4	10161.2	8891.09	7620.93	7620.93	10161.2
17	9486.26	9486.26	10672	9486.26	8300.47	7114.69	7114.69	9486.26
17.2	9443.57	9443.57	10624	9443.57	8263.12	7082.68	7082.68	9443.57
17.4	9538.21	9538.21	10730.5	9538.21	8345.93	7153.65	7153.65	9538.21
17.6	9661.53	9661.53	10869.2	9661.53	8453.83	7246.14	7246.14	9661.53
17.8	9927.85	9927.85	11168.8	9927.85	8686.87	7445.88	7445.88	9927.85
18	9384.78	9384.78	10557.9	9384.78	8211.69	7038.59	7038.59	9384.78
18.2	9432.01	9432.01	10611	9432.01	8253.01	7074	7074	9432.01
18.4	10147.3	10147.3	11415.7	10147.3	8878.89	7610.48	7610.48	10147.3
18.6	9812.97	9812.97	11039.6	9812.97	8586.35	7359.73	7359.73	9812.97
18.8	9751.15	9751.15	10970	9751.15	8532.25	7313.36	7313.36	9751.15
19	9782.41	9782.41	11005.2	9782.41	8559.6	7336.8	7336.8	9782.41
19.2	9839.27	9839.27	11069.2	9839.27	8609.37	7379.46	7379.46	9839.27
19.4	9662.52	9662.52	10870.3	9662.52	8454.71	7246.89	7246.89	9662.52
19.6	9845.94	9845.94	11076.7	9845.94	8615.2	7384.45	7384.45	9845.94
19.8	9596.73	9596.73	10796.3	9596.73	8397.14	7197.55	7197.55	9596.73
20	9989.9	9989.9	11238.6	9989.9	8741.17	7492.43	7492.43	9989.9
20.2	9527.87	9527.87	10718.9	9527.87	8336.89	7145.9	7145.9	9527.87
20.4	9299.78	9299.78	10462.3	9299.78	8137.31	6974.84	6974.84	9299.78
20.6	9553.67	9553.67	10747.9	9553.67	8359.46	7165.26	7165.26	9553.67
20.8	9815.35	9815.35	11042.3	9815.35	8588.43	7361.51	7361.51	9815.35
21	9442.53	9442.53	10622.8	9442.53	8262.21	7081.9	7081.9	9442.53
21.2	9713.61	9713.61	10927.8	9713.61	8499.41	7285.21	7285.21	9713.61
21.4	9336.22	9336.22	10503.3	9336.22	8169.19	7002.17	7002.17	9336.22
21.6	9900.3	9900.3	11137.8	9900.3	8662.77	7425.23	7425.23	9900.3
21.8	9806.2	9806.2	11032	9806.2	8580.43	7354.65	7354.65	9806.2
22	9406.72	9406.72	10582.6	9406.72	8230.88	7055.04	7055.04	9406.72
22.2	9810.8	9810.8	11037.1	9810.8	8584.45	7358.1	7358.1	9810.8
22.4	10127.7	10127.7	11393.6	10127.7	8861.7	7595.74	7595.74	10127.7
22.6	9439	9439	10618.9	9439	8259.13	7079.25	7079.25	9439
22.8	9842.61	9842.61	11072.9	9842.61	8612.28	7381.96	7381.96	9842.61
23	9473.17	9473.17	10657.3	9473.17	8289.03	7104.88	7104.88	9473.17
23.2	9824.55	9824.55	11052.6	9824.55	8596.48	7368.41	7368.41	9824.55
23.4	9723.06	9723.06	10938.4	9723.06	8507.68	7292.29	7292.29	9723.06
23.6	9381.32	9381.32	10554	9381.32	8208.66	7035.99	7035.99	9381.32
23.8	10111.4	10111.4	11375.3	10111.4	8847.46	7583.54	7583.54	10111.4
24	9951.62	9951.62	11195.6	9951.62	8707.67	7463.72	7463.72	9951.62
24.2	9742.84	9742.84	10960.7	9742.84	8524.99	7307.13	7307.13	9742.84
24.4	9694.39	9694.39	10906.2	9694.39	8482.59	7270.79	7270.79	9694.39
24.6	9946.92	9946.92	11190.3	9946.92	8703.55	7460.19	7460.19	9946.92
24.8	10140.4	10140.4	11407.9	10140.4	8872.84	7605.29	7605.29	10140.4
25	9486.31	9486.31	10672.1	9486.31	8300.52	7114.73	7114.73	9486.31
25.2	9656.8	9656.8	10863.9	9656.8	8449.7	7242.6	7242.6	9656.8
25.4	9363.19	9363.19	10533.6	9363.19	8192.79	7022.39	7022.39	9363.19
25.6	10055.9	10055.9	11312.9	10055.9	8798.92	7541.93	7541.93	10055.9
25.8	9821.61	9821.61	11049.3	9821.61	8593.91	7366.21	7366.21	9821.61
26	9617.28	9617.28	10819.4	9617.28	8415.12	7212.96	7212.96	9617.28
26.2	9783.51	9783.51	11006.5	9783.51	8560.57	7337.64	7337.64	9783.51
26.4	9588.68	9588.68	10787.3	9588.68	8390.1	7191.51	7191.51	9588.68
26.6	9717.96	9717.96	10932.7	9717.96	8503.22	7288.47	7288.47	9717.96
26.8	10010.7	10010.7	11262	10010.7	8759.35	7508.02	7508.02	10010.7
27	10325.5	10325.5	11616.1	10325.5	9034.78	7744.09	7744.09	10325.5
27.2	10210.6	10210.6	11486.9	10210.6	8934.26	7657.93	7657.93	10210.6
27.4	9793.37	9793.37	11017.5	9793.37	8569.2	7345.03	7345.03	9793.37
27.6	9775.1	9775.1	10997	9775.1	8553.22	7331.33	7331.33	9775.1
27.8	9632.93	9632.93	10837	9632.93	8428.82	7224.7	7224.7	9632.93
28	9965.52	9965.52	11211.2	9965.52	8719.83	7474.14	7474.14	9965.52
28.2	9750.99	9750.99	10969.9	9750.99	8532.12	7313.24	7313.24	9750.99
28.4	10218.8	10218.8	11496.1	10218.8	8941.42	7664.07	7664.07	10218.8
28.6	9904.52	9904.52	11142.6	9904.52	8666.46	7428.39	7428.39	9904.52
28.8	10001.6	10001.6	11251.8	10001.6	8751.37	7501.17	7501.17	10001.6
29	9459.1	9459.1	10641.5	9459.1	8276.71	7094.32	7094.32	9459.1
29.2	9952.45	9952.45	11196.5	9952.45	8708.39	7464.33	7464.33	9952.45
29.4	9958.98	9958.98	11203.9	9958.98	8714.11	7469.23	7469.23	9958.98
29.6	9643.99	9643.99	10849.5	9643.99	8438.49	7232.99	7232.99	9643.99
29.8	9961.78	9961.78	11207	9961.78	8716.56	7471.33	7471.33	9961.78
30	9476.03	9476.03	10660.5	9476.03	8291.53	7107.03	7107.03	9476.03
		Background corrected Data
Time (s)	Axon1	Axon2	Axon3	Axon4	Axon6	Axon7	Axon8	Axon9
0	2669.35	6810.55	5344.33	6287.85	3183.73	13682.5	16030.7	3625.69
0.2	7529.19	1784.18	9246.64	8120.19	3994.14	17159	18708.5	5194.62
0.4	6789.72	6940.57	8221.22	7389.99	3817.59	13388.1	13732.3	4877.54
0.6	5478.96	5451.18	5038.56	6434.76	5042.73	13490.6	17055.4	7965.75
0.8	7785.01	5486.28	7365.5	10336.3	3284.09	12265.4	15091	3323.97
1	3513.53	4499.8	8466.63	10007.5	5199.56	10614.8	10523.3	5877.5
1.2	6990.95	7544.47	6222.03	8934.13	1032.72	10628.6	13749.9	5528.75
1.4	3502.58	5429.49	13245.4	10387.4	4561.37	15971.5	20523.1	7620.66
1.6	7732.4	4071.35	11741.5	8842.21	3802.83	19302.5	14101.8	5023.68
1.8	6629.63	3354.05	12092	5135.59	5644.02	12446.6	12727.5	2847.71
2	1679.51	3267.15	9125.24	13265.7	4461.29	17916.6	8400.89	4093.64
2.2	7568.93	5121.63	10845.2	7622.68	6036.44	24275.8	12812.9	4510.1
2.4	5074.2	5377.54	8204.04	13269.9	2017.83	17081.9	13250.4	4256.1
2.6	3692.79	4486.76	8705.49	6853.22	3669.48	17442.6	9450.77	4276.59
2.8	5773.23	2722.94	10214.7	5517.1	4630.62	13969.2	10672.1	3806.15
3	5975.45	4618.04	14952.4	7468.3	4479.31	10697	14165.2	5014.54
3.2	6048.15	4200.89	10784.4	15396.6	4503.83	12804.9	13326.5	4512.24
3.4	5642.18	8364.71	10571.9	8952.89	94.5255	12523.6	12243	4554.47
3.6	5396.94	5756.02	11329.8	12097.2	2927.98	12702.3	11072.7	2194.98
3.8	8984.27	597.879	13843	9501.66	2762.07	13214.1	9621.81	6427.66
4	3456.28	3205.11	12858.1	8265.96	2243.24	21326.4	9354.58	4320.08
4.2	8994.46	3596.35	10577.1	7178.27	1778.16	27650.2	10847	9365.03
4.4	6830.35	8844.7	14987.5	10578.4	3046.51	21759.5	9977.36	4225.8
4.6	6823.84	2274.9	15804.4	11095.4	2383.52	28080.4	9572.95	6644.18
4.8	5614.4	6429.44	17016.1	8541.34	12560.4	28387.9	10763.2	4942.9
5	11173.3	4966.17	13933.3	14381.3	8567.07	32292	7433.1	5094.23
5.2	6266.84	9120.2	17033	12670.1	13526.7	24392.4	8234.57	5918.67
5.4	7108.12	8611.64	12958.3	11352.8	14199.1	22752.5	7122.3	5567.03
5.6	5872.06	11240.9	8206.39	11015.4	18008.4	28012.7	7261.51	4603.12
5.8	4937.74	9635.44	9602.98	9116.76	13635.6	32330.8	7154.67	2781.93
6	3552.47	8749.77	7132.46	10863.9	16874	26272.4	9234.56	7178.03
6.2	11029.8	12046.4	6542.47	9149.5	11191.5	28329.7	9532.6	4640.62
6.4	9464.41	22194.4	7128.94	10552.8	9579.7	17892.4	9070.3	7742.87
6.6	8133.48	15817.6	12446.6	8036.44	11617.6	15737.5	9027.27	7020.44
6.8	5621.63	11473.8	12009.1	6956.06	12511.3	18550.6	8579.62	6946.48
7	8204.95	13110.1	10181.7	3984.51	13151.9	17649.9	9978.43	7522.36
7.2	6329.19	17892	14219.4	7212.02	7182.91	22446.8	12972.5	8002.85
7.4	4904.22	10965.6	11632.6	10751.7	9863.89	18554.2	11875.2	6569.59
7.6	7163.29	12558.6	15684.7	5632.59	12919.4	25868.7	15666.6	6430.02
7.8	7428.14	14614.4	21899.3	8926.77	12461.2	29556.6	14381.7	8414.16
8	9056.57	9994.25	19352.7	6856.62	11335.2	48162.6	11879	4122.03
8.2	4164.67	7126.03	15039.9	9362.52	6871.95	49447.9	13602.9	7208.9
8.4	4995.89	17419.4	14255.4	5365.11	10453.4	48057.4	19558.6	6793.62
8.6	6131.79	17180.3	10025.2	3311.44	10136.2	61645.6	13758.6	7657.51
8.8	11618	16487.1	10096.6	9195.17	12237.7	63417.1	16022.6	7742.41
9	7753.65	16621.9	9264.76	2318.53	11794.2	61744.1	19380	6368.93
9.2	8159.6	13679.9	9205.36	5450.77	11042	56247.1	16641.8	5947.94
9.4	7826.06	11102	14530.3	6033.92	13846.2	59151.7	21622.5	7509.36
9.6	9809.43	12587.4	21787.9	3571.08	12743.7	71720.3	12955.3	6414.1
9.8	9066.99	13045.1	18042.3	8349.91	9604.61	71886	14126	4508.68
10	9194.21	15325.1	14404.2	4340.33	9110.47	72475.1	11590.9	6464.44
10.2	9341.7	12037.5	15110.7	5182.28	9144.78	59797.7	17246.1	9807.67
10.4	10507.7	14960.1	13928	6078.74	15844.5	57462.9	16248.4	6531.21
10.6	7742.48	16742.7	20249.5	5499.87	21137.5	52538.3	18736.8	8389.99
10.8	9149.95	16551.4	20590.6	3940.75	22810.1	52747.5	20896.3	5595.85
11	9647.13	14396.6	23456.1	4546.52	20510.4	61004.1	16937.2	9022.76
11.2	8108.61	14194.9	18790.4	5754.09	22513.8	58702.6	20248	10835.5
11.4	8460.05	16961.8	15059.9	6634.87	18120.5	64161.4	17075.2	7155.17
11.6	8840.74	10933.3	15008.5	5362.63	17266.9	64384.6	17562.4	4084.75
11.8	6332.32	15968.4	26006.7	9259.81	16042.8	50447.4	17474.1	3942.74
12	7728.66	14358.6	22165.4	8774.27	18523.1	51251.2	25740.5	8388.58
12.2	5720.35	16098.2	21566.5	8256.84	16853.8	44193.7	19779.2	11280.2
12.4	6968.13	15637.9	22275.3	11293.2	20175.2	48771.6	17689.5	8865.2
12.6	11110.2	13290.3	21793.6	12867.9	18505.3	46260.4	22740.1	6671.99
12.8	9341.17	19064	14190.3	8992.87	11196.7	43302.6	21410.4	2914.84
13	5842.67	26369.9	26426.1	14676.1	16624.4	47300.1	21071.6	9067.97
13.2	3833.65	21092.7	17497.9	12306	15965.6	49725.6	15295.8	4991.39
13.4	7575.91	25880.9	17482.9	9723.32	19561.5	46897.3	18002.2	10871.1
13.6	8223.26	25809.8	16561.3	12890.4	18861.4	49983.7	15071.4	5832.25
13.8	7182.82	26896.7	23106.4	12622.6	15557.5	42961.4	22186.1	6057.48
14	13656	24780.5	14908.2	9314.7	18740.5	39802.9	25430	5776.52
14.2	7587.96	20884.8	13559.5	11574.8	16287.6	39926.8	25114.2	5710.52
14.4	7207.45	29396.4	14327.3	12377.1	24807	35148.5	20406.6	12033.1
14.6	7228.15	32329	12253.7	9563.08	24214.3	35129.1	24546	6908.05
14.8	10511.6	17173.7	8300.46	15589.6	19232.8	38267.6	14519	4460.78
15	7660.45	22558.8	6925.14	17079.1	17594.8	39073.6	11687.5	5499.43
15.2	3482.15	20651.8	3095.09	15568.2	18539.1	40144.4	10733.1	4627.22
15.4	9226.27	21295.7	9578.93	14478	20064.6	39067.7	11435.4	7417.91
15.6	3725.07	17979.6	7030.69	25828.8	19396.4	41160.7	12081.7	5137.04
15.8	11380.7	21333.4	10520.7	26974.5	24766.7	40459.2	15646.8	5090.74
16	12302	18994.5	10532.5	39124.3	19405.4	36219.4	16571.1	7497.13
16.2	13202.1	25958.8	8655.48	42413.3	17161.4	36504.8	17854.1	2919.56
16.4	15236.8	22445.5	9450.05	44954.3	17271	32950.3	13235.8	3587.6
16.6	6758.54	20207.2	7937.48	33792.5	14863.5	34418.6	10393.9	2208.86
16.8	11532.2	17156.7	6196.62	32983.3	14500.2	36152.7	11084.4	3604.89
17	9380.27	20370.8	10905.2	40809.2	13513.2	37022.6	18950.6	4688.15
17.2	11325.6	19939.6	10186.1	48476.2	12126	32248.1	14667.5	5758.92
17.4	12379.1	18150.2	12787.8	49385.1	12215.1	29713.7	11280.1	8201.47
17.6	16788.4	18506.1	9972.91	46676.2	13648.2	19299.8	6907.96	9352.17
17.8	17187.2	15377.5	10280.5	50751.9	11580.4	22423.9	10023.4	5871.93
18	20787.8	16641.2	8386.79	37742.4	9010.99	22877.7	6861.51	7182.03
18.2	20796.9	13753.4	10852.2	37190.6	8610.92	24179.9	7407.93	2601.25
18.4	20864	14996.1	9973.25	38646	8194.21	21278.5	15447.7	5861.95
18.6	20423.9	9319.04	12005.6	30903.9	14183	20066.6	15465.7	3363.39
18.8	24930.1	12759	8311.4	22317.2	9435.72	17969.8	17591.5	3188.01
19	26464.4	6621.08	9128.48	29488.9	11758	12695.3	23171	5160.93
19.2	28749.8	5217.49	10073	20170.6	11000.7	11268.6	19904.9	10344.7
19.4	22558.8	3447.72	14589.8	21529.3	5966.73	15867.3	15889.9	7163.15
19.6	18742.8	5584.19	12808.9	13131.8	7808.91	15070.6	12458.2	3325.95
19.8	16104	4613.27	7157.13	20139.1	3822.65	16834.3	12663	2949.99
20	14674.9	4095.26	2554.72	21014.2	6340.17	13477.2	16292.7	3598.68
20.2	17940.4	3533.14	11027.3	19409	9221.28	16785.6	16067.6	9253.73
20.4	18940.5	3774.84	8541.35	21602	8004.11	16001.8	11640	6822.43
20.6	20986.7	7960.74	7188.3	18913.3	9770.27	21527.9	12765.1	7129.78
20.8	24128.8	7562.41	12510.4	22766.8	11699.7	26271	13428.9	5475.08
21	19892	2796.93	7839.63	22255.4	6579.63	24571.2	13638.2	9364.18
21.2	22472.1	7378.95	7176.58	14781.7	6384.97	24663	14462.2	6712.18
21.4	18352	6060.96	11807.2	13909.5	5707.64	24846.1	16202.4	6402.96
21.6	19910.7	8030.16	12999.8	14709.2	5437.52	23077.2	14312.6	4174.96
21.8	16163.8	4113.15	13145.8	25549	6862.55	27589.5	18990	7975.75
22	17024.7	6921.37	11308.9	23787.4	9886.55	23869.8	20807.4	3895.43
22.2	15651.8	6191.14	9552.99	13476.4	15659.5	19642.1	18112.4	5992.63
22.4	16023.5	9225.36	14199.4	15703	11711.2	22005.7	16851.6	3545.81
22.6	21845.9	9500.88	5162.2	11104.3	17065.9	17641	21497	3886.16
22.8	15320.2	7305.23	8534.31	11369.3	22662	23772.6	19785.8	3204.9
23	22155.4	9606.38	8529.92	21147.9	23309.3	18248.5	32736.5	4415.58
23.2	19691.6	7778.29	5361.92	14887.7	28953.7	19389.5	34137.9	8203.35
23.4	20262.5	9224.21	8238.14	17264.2	24631.7	22405.9	20732.2	8391.52
23.6	23939.8	8562.71	7978.84	19195.9	27271.8	20213.6	15180.7	7354.96
23.8	15902.9	10785.5	6623.62	13009.6	18269.3	21799.7	19082	3633.2
24	19704.8	10497.9	9717.16	10379.2	13838	22790.9	17475.8	3883.91
24.2	18104	8382.82	4309.74	16441.5	13381.3	20168.5	23207.4	3598.33
24.4	14787.2	12176.9	11579.2	13193.8	10001	26540.3	27299.9	3502.64
24.6	24675.5	13555.9	10038.6	11963.6	11416	31024.4	23183	3109.77
24.8	20105.2	5799.58	4837.79	13487.9	7734.68	21768	34442	875.746
25	24684.3	9164.08	9053.44	15484.4	15252.6	21161.8	29197.7	8789
25.2	19574.4	11709.5	7160.85	17675.7	11824.8	15812.4	21744.2	3660.47
25.4	18780.7	6846.54	3804.35	15221.6	6036.9	16308.2	15648	4197.13
25.6	18702.5	6989.36	9830.34	17833.5	3362.93	16410.3	16452	8381.64
25.8	24105.2	5844.9	10134.1	12227.2	7177.05	17285.4	12445.1	5679.04
26	15824.4	9349.18	5762.96	15054.2	8335.33	18393.7	11226.1	5708.54
26.2	20332.4	7510.59	11979.8	14832.8	5640.69	19120.1	15230.2	9496.3
26.4	28195.3	7937.81	9829.77	30502.3	5775.76	18638.4	14015.9	5124.12
26.6	23258.9	4010.2	13178.7	44171	7067.72	19104.2	18610.6	9532.45
26.8	23288.2	3790.49	2063.99	51123.1	10287.7	29995.8	19542.5	6613.46
27	19549.2	6911.86	8981.52	55606	11032.8	25416.9	19307.5	5466.62
27.2	19885.4	4398.44	4837.12	55026.1	5080.53	16397.1	11991.8	7642.11
27.4	17502.9	5809.25	5947.57	48094.2	6162.06	21371.7	10809.8	9031.49
27.6	17452.4	4023.26	6784.37	47587.9	4346.03	16343.4	16730.2	9079.26
27.8	17240.7	5266.87	6740.08	50072.3	4676.31	28331.1	12771.6	8306.04
28	23909.9	6463.07	8627.77	49055.1	3150.11	26832.7	12762.5	5535.26
28.2	18467.1	472.794	6160.51	50828.3	4695.37	27549.6	12002.5	7451.06
28.4	15977.9	6049.7	7617.72	36308.8	2748.92	25002.5	11936	7482.89
28.6	21186.7	2549.39	8328.26	33774.5	493.149	22045.7	8960.24	7466.4
28.8	21027.8	3874.38	12252.5	25845	7179.18	24199.1	8081.95	11885.4
29	17948.8	5515.48	6372.7	23041.3	26994.5	21545	8599.09	5592.22
29.2	18621.1	9005.74	5683.85	22857.2	24215.2	22732.5	12575.7	7683.91
29.4	19943.5	8609.86	6127.65	25446.6	22813.9	21211.3	8658.49	7135.55
29.6	23594.4	8429.04	7752.7	22653.2	12161.7	20170.6	14319.4	6606.36
29.8	21377.7	7197.39	8032.09	23780.6	17982.9	19758.4	9230.54	4494.39
30	23201.7	9153.2	9369.94	25032.8	12830.6	23523.5	9560.48	3035.55
		Normalized Data
Time (s)	Axon1	Axon2	Axon3	Axon4	Axon6	Axon7	Axon8	Axon9
0	0.806269	2.95785	1.30197	1.50811	1.7226	1.15321	2.14124	1.43136
0.2	2.27417	0.774877	2.25265	1.94758	2.16109	1.44622	2.49892	2.05074
0.4	2.05082	3.01432	2.00284	1.77245	2.06556	1.1284	1.83425	1.92557
0.6	1.65491	2.36747	1.22748	1.54334	2.72844	1.13704	2.27812	3.14474
0.8	2.35144	2.38272	1.79437	2.47911	1.7769	1.03377	2.01573	1.31225
1	1.06125	1.95428	2.06262	2.40025	2.8133	0.89465	1.40561	2.32033
1.2	2.1116	3.2766	1.5158	2.1428	0.558766	0.895814	1.83659	2.18265
1.4	1.05795	2.35805	3.22683	2.49137	2.46799	1.34613	2.74129	3.0085
1.6	2.33555	1.76821	2.86045	2.12076	2.05757	1.62688	1.88359	1.98326
1.8	2.00246	1.45668	2.94584	1.23174	3.05378	1.04904	1.70003	1.12423
2	0.507291	1.41894	2.22307	3.18171	2.41384	1.51008	1.12212	1.6161
2.2	2.28618	2.22435	2.64209	1.82826	3.2661	2.04605	1.71144	1.78051
2.4	1.53265	2.33549	1.99865	3.18272	1.09178	1.43972	1.76988	1.68023
2.6	1.1154	1.94862	2.12081	1.64371	1.98542	1.47012	1.26235	1.68832
2.8	1.74379	1.18258	2.48848	1.32325	2.50546	1.17738	1.42548	1.5026
3	1.80487	2.00564	3.64267	1.79123	2.42359	0.901582	1.89206	1.97965
3.2	1.82683	1.82447	2.62727	3.69279	2.43686	1.07924	1.78004	1.78135
3.4	1.70421	3.63283	2.57551	2.1473	0.0511444	1.05553	1.63532	1.79802
3.6	1.63013	2.49987	2.76014	2.90145	1.58422	1.0706	1.479	0.866541
3.8	2.71368	0.259661	3.37241	2.27892	1.49446	1.11373	1.2852	2.53753
4	1.04396	1.39199	3.13246	1.98255	1.21373	1.79747	1.2495	1.70549
4.2	2.71675	1.56191	2.57678	1.72167	0.962097	2.33045	1.44885	3.69715
4.4	2.06309	3.84129	3.65123	2.53718	1.64836	1.83396	1.33269	1.66827
4.6	2.06112	0.988001	3.85023	2.66116	1.28963	2.36671	1.27867	2.62301
4.8	1.69582	2.79234	4.14544	2.0486	6.796	2.39264	1.43765	1.95137
5	3.37486	2.15683	3.3944	3.44928	4.63534	2.72168	0.992849	2.01111
5.2	1.89288	3.96094	4.14955	3.03885	7.31879	2.05587	1.0999	2.33659
5.4	2.14699	3.74008	3.15687	2.7229	7.68261	1.91766	0.951335	2.19777
5.6	1.77364	4.88198	1.99922	2.642	9.7437	2.36101	0.96993	1.81723
5.8	1.49143	4.18472	2.33946	2.18661	7.37773	2.72495	0.955658	1.09826
6	1.07302	3.80006	1.7376	2.60565	9.12992	2.21433	1.23347	2.83376
6.2	3.33151	5.23179	1.59386	2.19446	6.0553	2.38772	1.27328	1.83203
6.4	2.8587	9.63914	1.73674	2.53103	5.18323	1.50803	1.21153	3.05675
6.6	2.4567	6.86964	3.0322	1.9275	6.28588	1.32641	1.20578	2.77154
6.8	1.698	4.9831	2.92564	1.66837	6.76939	1.56351	1.14599	2.74235
7	2.47828	5.69378	2.48045	0.955664	7.11602	1.48759	1.33283	2.96969
7.2	1.91172	7.77056	3.46411	1.72976	3.88641	1.8919	1.73275	3.15939
7.4	1.48131	4.76242	2.8339	2.57875	5.33699	1.56381	1.58619	2.59356
7.6	2.16365	5.45428	3.82107	1.35095	6.99025	2.1803	2.0926	2.53846
7.8	2.24365	6.34709	5.33507	2.14104	6.74232	2.49113	1.92098	3.32176
8	2.73551	4.34055	4.71468	1.64452	6.13306	4.05932	1.58669	1.6273
8.2	1.25793	3.09487	3.664	2.24555	3.71817	4.16764	1.81696	2.84595
8.4	1.509	7.56532	3.47288	1.28679	5.65594	4.05045	2.61247	2.682
8.6	1.85209	7.46147	2.44231	0.794231	5.48434	5.19571	1.83776	3.02305
8.8	3.50919	7.16043	2.45971	2.20541	6.6214	5.34502	2.14016	3.05657
9	2.34197	7.21895	2.25706	0.556086	6.38142	5.20401	2.58861	2.51434
9.2	2.46459	5.94126	2.24259	1.30734	5.97444	4.7407	2.22287	2.34814
9.4	2.36384	4.82167	3.53985	1.4472	7.49167	4.98552	2.88814	2.96456
9.6	2.96291	5.46677	5.30792	0.856505	6.89518	6.04484	1.73045	2.53217
9.8	2.73866	5.66553	4.39543	2.00268	5.19671	6.05881	1.88682	1.77995
10	2.77709	6.65577	3.50911	1.041	4.92935	6.10846	1.54822	2.55205
10.2	2.82164	5.22794	3.68124	1.24294	4.94791	5.03996	2.30358	3.8719
10.4	3.17382	6.49724	3.3931	1.45795	8.57289	4.84317	2.17032	2.57841
10.6	2.3386	7.27143	4.93315	1.31912	11.4368	4.42811	2.5027	3.31222
10.8	2.76372	7.18836	5.01624	0.945167	12.3417	4.44574	2.79115	2.20914
11	2.91389	6.2525	5.71434	1.09046	11.0975	5.14164	2.26233	3.56203
11.2	2.44919	6.1649	4.57767	1.38009	12.1814	4.94766	2.70455	4.27768
11.4	2.55534	7.36658	3.66885	1.59134	9.80433	5.40775	2.28075	2.82473
11.6	2.67032	4.74838	3.65635	1.2862	9.34248	5.42656	2.34583	1.61259
11.8	1.91266	6.93514	6.3357	2.22092	8.68018	4.25189	2.33404	1.55653
12	2.33442	6.23602	5.39988	2.10446	10.0222	4.31963	3.4382	3.31166
12.2	1.72782	6.99154	5.25399	1.98036	9.11901	3.7248	2.64193	4.45321
12.4	2.10471	6.79162	5.42667	2.7086	10.9161	4.11065	2.3628	3.49983
12.6	3.35582	5.77205	5.30932	3.08629	10.0126	3.89899	3.03743	2.63399
12.8	2.82148	8.27957	3.457	2.15689	6.05814	3.64969	2.85982	1.15073
13	1.76476	11.4526	6.43788	3.51998	8.99489	3.98662	2.81457	3.57987
13.2	1.15795	9.16068	4.2628	2.95153	8.63842	4.19105	2.04308	1.97051
13.4	2.28828	11.2402	4.25915	2.33209	10.584	3.95267	2.40458	4.29172
13.6	2.48382	11.2093	4.03462	3.09169	10.2052	4.2128	2.01311	2.30247
13.8	2.16955	11.6814	5.62914	3.02746	8.41761	3.62094	2.96343	2.39139
14	4.12475	10.7623	3.6319	2.23408	10.1398	3.35473	3.39672	2.28047
14.2	2.29193	9.07037	3.30334	2.77615	8.81263	3.36517	3.35453	2.25441
14.4	2.17699	12.767	3.49038	2.96858	13.4222	2.96244	2.72573	4.75044
14.6	2.18325	14.0406	2.98523	2.29365	13.1015	2.9608	3.27864	2.72717
14.8	3.17501	7.45864	2.02214	3.73909	10.4062	3.22532	1.93932	1.76104
15	2.31382	9.7974	1.68709	4.09632	9.51992	3.29326	1.56112	2.17108
15.2	1.05177	8.96915	0.75402	3.73396	10.0309	3.38351	1.43363	1.82675
15.4	2.78677	9.2488	2.3336	3.47248	10.8562	3.29276	1.52744	2.92846
15.6	1.12515	7.80863	1.7128	6.19491	10.4947	3.46916	1.61377	2.02801
15.8	3.43752	9.26518	2.56303	6.46969	13.4004	3.41005	2.08996	2.00974
16	3.71579	8.24939	2.5659	9.38377	10.4996	3.0527	2.21343	2.95973
16.2	3.98766	11.274	2.10863	10.1726	9.28539	3.07675	2.38479	1.15259
16.4	4.60223	9.74819	2.3022	10.782	9.3447	2.77717	1.76792	1.41632
16.6	2.0414	8.7761	1.93371	8.10495	8.0421	2.90092	1.38833	0.872018
16.8	3.48328	7.45125	1.50961	7.91086	7.84553	3.04707	1.48055	1.42315
17	2.83329	8.84713	2.65671	9.78787	7.31153	3.1204	2.53126	1.8508
17.2	3.42088	8.65984	2.48152	11.6268	6.56092	2.71798	1.95916	2.27352
17.4	3.73907	7.88272	3.11535	11.8448	6.60915	2.50437	1.50669	3.23779
17.6	5.07089	8.03727	2.42958	11.195	7.38453	1.62666	0.922705	3.69207
17.8	5.19136	6.67851	2.50452	12.1726	6.26572	1.88996	1.33884	2.31814
18	6.27891	7.22734	2.04317	9.05231	4.87552	1.92821	0.916501	2.83534
18.2	6.28166	5.97315	2.6438	8.91998	4.65906	2.03797	0.989487	1.02693
18.4	6.30193	6.51286	2.42966	9.26903	4.43359	1.79342	2.06336	2.3142
18.6	6.16898	4.0473	2.92478	7.41213	7.67393	1.69129	2.06577	1.32781
18.8	7.53008	5.54129	2.02481	5.35266	5.10533	1.51456	2.34972	1.25857
19	7.9935	2.87556	2.22386	7.07275	6.36182	1.07001	3.09499	2.03745
19.2	8.68379	2.26598	2.45397	4.8378	5.95209	0.949757	2.65872	4.08392
19.4	6.81383	1.49736	3.55434	5.16369	3.22839	1.33735	2.12244	2.82788
19.6	5.66121	2.42524	3.12048	3.14958	4.22512	1.2702	1.66406	1.31302
19.8	4.86418	2.00356	1.7436	4.83027	2.0683	1.41885	1.69142	1.1646
20	4.43252	1.77859	0.622375	5.04014	3.43044	1.13591	2.17623	1.4207
20.2	5.41886	1.53446	2.68645	4.65514	4.9893	1.41475	2.14617	3.65321
20.4	5.72092	1.63943	2.08083	5.18113	4.33073	1.34868	1.55478	2.69338
20.6	6.33898	3.45739	1.7512	4.53625	5.28634	1.81445	1.70505	2.81471
20.8	7.28803	3.28439	3.04776	5.46049	6.33029	2.21421	1.79371	2.16147
21	6.00834	1.21472	1.90987	5.33785	3.56	2.07095	1.82167	3.69682
21.2	6.78765	3.20471	1.74834	3.54532	3.45468	2.07869	1.93173	2.64985
21.4	5.54316	2.6323	2.87645	3.33611	3.0882	2.09412	2.16418	2.52778
21.6	6.01397	3.48753	3.16699	3.52793	2.94205	1.94502	1.91175	1.6482
21.8	4.88225	1.78636	3.20255	6.12779	3.71308	2.32534	2.53651	3.14869
22	5.14228	3.00598	2.75504	5.70528	5.34925	2.01183	2.77928	1.53785
22.2	4.72759	2.68884	2.32728	3.23225	8.47278	1.6555	2.4193	2.36579
22.4	4.83985	4.00662	3.45923	3.76629	6.33651	1.85472	2.25089	1.39982
22.6	6.5985	4.12628	1.2576	2.66331	9.23373	1.48685	2.87138	1.53419
22.8	4.62742	3.1727	2.07911	2.72686	12.2616	2.00364	2.64281	1.26524
23	6.69199	4.17209	2.07804	5.07221	12.6118	1.53805	4.37265	1.74319
23.2	5.94781	3.37815	1.30626	3.57074	15.6658	1.63421	4.55984	3.23854
23.4	6.12024	4.00612	2.00696	4.14072	13.3273	1.88844	2.76923	3.31282
23.6	7.23096	3.71882	1.94379	4.60404	14.7558	1.70368	2.0277	2.90361
23.8	4.80344	4.68418	1.61363	3.12028	9.88484	1.83736	2.54881	1.43433
24	5.9518	4.55928	2.36728	2.48941	7.48722	1.9209	2.33427	1.5333
24.2	5.46828	3.6407	1.04993	3.94342	7.24014	1.69988	3.09984	1.42056
24.4	4.46644	5.2885	2.82091	3.16445	5.41118	2.23691	3.64648	1.38278
24.6	7.45318	5.88741	2.44558	2.8694	6.17676	2.61484	3.09659	1.22768
24.8	6.07274	2.51878	1.17857	3.23499	4.18496	1.83469	4.60046	0.345729
25	7.45584	3.98	2.20558	3.71385	8.25263	1.78359	3.89998	3.46974
25.2	5.91239	5.08551	1.74451	4.23941	6.398	1.33273	2.9044	1.44509
25.4	5.67266	2.97348	0.926809	3.65082	3.26635	1.37451	2.09012	1.65695
25.6	5.64905	3.03551	2.39485	4.27728	1.81956	1.38311	2.19751	3.30893
25.8	7.28091	2.53847	2.46885	2.93262	3.88325	1.45687	1.66231	2.24199
26	4.77972	4.06039	1.40396	3.61066	4.50994	1.55029	1.49948	2.25363
26.2	6.14135	3.26189	2.9185	3.55757	3.05198	1.61151	2.03432	3.74897
26.4	8.51632	3.44743	2.39471	7.31581	3.12505	1.57091	1.87212	2.02291
26.6	7.02531	1.74165	3.21056	10.5942	3.82409	1.61017	2.48585	3.76324
26.8	7.03414	1.64623	0.502824	12.2616	5.56629	2.52815	2.61032	2.61088
27	5.90479	3.00185	2.18806	13.3368	5.96944	2.14223	2.57893	2.15813
27.2	6.00632	1.91026	1.17841	13.1977	2.74889	1.382	1.60176	3.01697
27.4	5.2867	2.52298	1.44894	11.5351	3.33407	1.80128	1.44388	3.56547
27.6	5.27146	1.74732	1.65279	11.4137	2.35148	1.37748	2.23468	3.58433
27.8	5.20751	2.28742	1.64201	12.0096	2.53018	2.38785	1.70591	3.27908
28	7.22193	2.80694	2.10188	11.7656	1.70441	2.26155	1.70471	2.18522
28.2	5.57794	0.205337	1.50081	12.1909	2.5405	2.32198	1.6032	2.94155
28.4	4.82607	2.62741	1.85581	8.70847	1.48734	2.1073	1.5943	2.95411
28.6	6.39938	1.10721	2.02891	8.10064	0.266825	1.85809	1.19683	2.9476
28.8	6.35139	1.68266	2.98493	6.19878	3.8844	2.03959	1.07952	4.69214
29	5.42139	2.3954	1.5525	5.52634	14.6057	1.81589	1.14859	2.20771
29.2	5.62447	3.91123	1.38469	5.48219	13.102	1.91598	1.67975	3.03347
29.4	6.02389	3.7393	1.4928	6.10323	12.3438	1.78776	1.15653	2.81699
29.6	7.12664	3.66077	1.8887	5.43325	6.58025	1.70005	1.91266	2.60807
29.8	6.45709	3.12586	1.95676	5.70366	9.72991	1.66531	1.23294	1.7743
30	7.00802	3.97528	2.28268	6.00397	6.94219	1.98264	1.27701	1.19838
		Cumulative Value
Summary	Axon1	Axon2	Axon3	Axon4	Axon6	Axon7	Axon8	Axon9
	583.94	724.07	413.798	649.1	949.937	372.808	307.484	360.626

## Sheet: WT-Culture2-seq01
		Raw Data
Time (S)	Area1	Angle1	IntDen1	RawIntDen1	Length1	Area2	Angle2	IntDen2	RawIntDen2	Length2	Area3	Angle3	IntDen3	RawIntDen3	Length3	Area4	Angle4	IntDen4	RawIntDen4	Length4	Area5	IntDen5	RawIntDen5	Area6	Angle6	IntDen6	RawIntDen6	Length6	Area7	Angle7	IntDen7	RawIntDen7	Length7	Area8	Angle8	IntDen8	RawIntDen8	Length8	Area9	Angle9	IntDen9	RawIntDen9	Length9
0	6	-53.1301	11871.8	11871.8	4.97572	6	11.3099	17649.9	17649.9	5.04425	6	36.8699	14308.4	14308.4	4.87214	5	-116.565	12807.7	12807.7	4.40328	1136	2101378	2101378	6	36.8699	14783.9	14783.9	4.78605	6	-68.1986	15072.3	15072.3	5.05971	5	-90	15250.5	15250.5	4.43628	6	-104.036	18760.9	18760.9	4.60977
0.2	6	-53.1301	13284.4	13284.4	4.97572	6	11.3099	15838.2	15838.2	5.04425	6	36.8699	15283.3	15283.3	4.87214	5	-116.565	11501	11501	4.40328	1136	1.78594e+06	1.78594e+06	6	36.8699	18242.8	18242.8	4.78605	6	-68.1986	16011	16011	5.05971	5	-90	11677.9	11677.9	4.43628	6	-104.036	13655.3	13655.3	4.60977
0.4	6	-53.1301	15525.6	15525.6	4.97572	6	11.3099	15971.1	15971.1	5.04425	6	36.8699	19139.7	19139.7	4.87214	5	-116.565	15116.2	15116.2	4.40328	1136	1.78053e+06	1.78053e+06	6	36.8699	15723.1	15723.1	4.78605	6	-68.1986	16677.2	16677.2	5.05971	5	-90	15602	15602	4.43628	6	-104.036	14049	14049	4.60977
0.6	6	-53.1301	15160.7	15160.7	4.97572	6	11.3099	17494.4	17494.4	5.04425	6	36.8699	17163.9	17163.9	4.87214	5	-116.565	13800	13800	4.40328	1136	1859716	1859716	6	36.8699	16240	16240	4.78605	6	-68.1986	17495.9	17495.9	5.05971	5	-90	14661.5	14661.5	4.43628	6	-104.036	14906.3	14906.3	4.60977
0.8	6	-53.1301	21739.3	21739.3	4.97572	6	11.3099	15236	15236	5.04425	6	36.8699	19115.9	19115.9	4.87214	5	-116.565	11715.8	11715.8	4.40328	1136	1.72169e+06	1.72169e+06	6	36.8699	14191.2	14191.2	4.78605	6	-68.1986	15115.7	15115.7	5.05971	5	-90	14216.7	14216.7	4.43628	6	-104.036	14518.2	14518.2	4.60977
1	6	-53.1301	15032.1	15032.1	4.97572	6	11.3099	14910.3	14910.3	5.04425	6	36.8699	19076.3	19076.3	4.87214	5	-116.565	14808.6	14808.6	4.40328	1136	1709538	1709538	6	36.8699	15186.3	15186.3	4.78605	6	-68.1986	16085.2	16085.2	5.05971	5	-90	15148.6	15148.6	4.43628	6	-104.036	14344.5	14344.5	4.60977
1.2	6	-53.1301	16527.9	16527.9	4.97572	6	11.3099	15559	15559	5.04425	6	36.8699	19055	19055	4.87214	5	-116.565	12276.3	12276.3	4.40328	1136	1.80983e+06	1.80983e+06	6	36.8699	13880.2	13880.2	4.78605	6	-68.1986	13083.2	13083.2	5.05971	5	-90	13051.7	13051.7	4.43628	6	-104.036	16296	16296	4.60977
1.4	6	-53.1301	16825.9	16825.9	4.97572	6	11.3099	18760.7	18760.7	5.04425	6	36.8699	20123.3	20123.3	4.87214	5	-116.565	15237.3	15237.3	4.40328	1136	1.767e+06	1.767e+06	6	36.8699	15337.4	15337.4	4.78605	6	-68.1986	14053.4	14053.4	5.05971	5	-90	15733.9	15733.9	4.43628	6	-104.036	19410.8	19410.8	4.60977
1.6	6	-53.1301	22200	22200	4.97572	6	11.3099	12522.9	12522.9	5.04425	6	36.8699	24622.7	24622.7	4.87214	5	-116.565	21884.1	21884.1	4.40328	1136	1.76783e+06	1.76783e+06	6	36.8699	15217.3	15217.3	4.78605	6	-68.1986	16093.2	16093.2	5.05971	5	-90	18617	18617	4.43628	6	-104.036	18110	18110	4.60977
1.8	6	-53.1301	16781.8	16781.8	4.97572	6	11.3099	15127.4	15127.4	5.04425	6	36.8699	24943.5	24943.5	4.87214	5	-116.565	21419.1	21419.1	4.40328	1136	1.76663e+06	1.76663e+06	6	36.8699	14818.3	14818.3	4.78605	6	-68.1986	15203.2	15203.2	5.05971	5	-90	17984.8	17984.8	4.43628	6	-104.036	13410.9	13410.9	4.60977
2	6	-53.1301	14585.6	14585.6	4.97572	6	11.3099	12698.6	12698.6	5.04425	6	36.8699	27533.2	27533.2	4.87214	5	-116.565	15291	15291	4.40328	1136	1.7813e+06	1.7813e+06	6	36.8699	14774.8	14774.8	4.78605	6	-68.1986	15167.6	15167.6	5.05971	5	-90	12123.4	12123.4	4.43628	6	-104.036	11462.4	11462.4	4.60977
2.2	6	-53.1301	13101.7	13101.7	4.97572	6	11.3099	19885.8	19885.8	5.04425	6	36.8699	24111.9	24111.9	4.87214	5	-116.565	13693.2	13693.2	4.40328	1136	1.83254e+06	1.83254e+06	6	36.8699	15105.8	15105.8	4.78605	6	-68.1986	15034.7	15034.7	5.05971	5	-90	11608.1	11608.1	4.43628	6	-104.036	14452.4	14452.4	4.60977
2.4	6	-53.1301	14468.5	14468.5	4.97572	6	11.3099	19158.1	19158.1	5.04425	6	36.8699	19036.5	19036.5	4.87214	5	-116.565	12848.1	12848.1	4.40328	1136	1.80556e+06	1.80556e+06	6	36.8699	15006.6	15006.6	4.78605	6	-68.1986	16032.3	16032.3	5.05971	5	-90	12259.2	12259.2	4.43628	6	-104.036	15465.7	15465.7	4.60977
2.6	6	-53.1301	13504.7	13504.7	4.97572	6	11.3099	19587.7	19587.7	5.04425	6	36.8699	20752.6	20752.6	4.87214	5	-116.565	12745.7	12745.7	4.40328	1136	1.74467e+06	1.74467e+06	6	36.8699	16698.2	16698.2	4.78605	6	-68.1986	12747.4	12747.4	5.05971	5	-90	12281.8	12281.8	4.43628	6	-104.036	17252.1	17252.1	4.60977
2.8	6	-53.1301	13412.5	13412.5	4.97572	6	11.3099	17286.6	17286.6	5.04425	6	36.8699	24540.7	24540.7	4.87214	5	-116.565	13224	13224	4.40328	1136	1.79449e+06	1.79449e+06	6	36.8699	15101.1	15101.1	4.78605	6	-68.1986	15398.2	15398.2	5.05971	5	-90	11006	11006	4.43628	6	-104.036	15823.3	15823.3	4.60977
3	6	-53.1301	19240.4	19240.4	4.97572	6	11.3099	15883.2	15883.2	5.04425	6	36.8699	20822.7	20822.7	4.87214	5	-116.565	14561.2	14561.2	4.40328	1136	1752566	1752566	6	36.8699	16334.6	16334.6	4.78605	6	-68.1986	13659.8	13659.8	5.05971	5	-90	8527.28	8527.28	4.43628	6	-104.036	16645.5	16645.5	4.60977
3.2	6	-53.1301	23913.1	23913.1	4.97572	6	11.3099	23402.8	23402.8	5.04425	6	36.8699	23593.5	23593.5	4.87214	5	-116.565	12032.8	12032.8	4.40328	1136	1.73359e+06	1.73359e+06	6	36.8699	14210.4	14210.4	4.78605	6	-68.1986	15178.4	15178.4	5.05971	5	-90	9580.74	9580.74	4.43628	6	-104.036	17186.5	17186.5	4.60977
3.4	6	-53.1301	33514.8	33514.8	4.97572	6	11.3099	21343.1	21343.1	5.04425	6	36.8699	24225.4	24225.4	4.87214	5	-116.565	13389.6	13389.6	4.40328	1136	1.76996e+06	1.76996e+06	6	36.8699	16441.1	16441.1	4.78605	6	-68.1986	18364.8	18364.8	5.05971	5	-90	9647.8	9647.8	4.43628	6	-104.036	15042.6	15042.6	4.60977
3.6	6	-53.1301	33510.3	33510.3	4.97572	6	11.3099	20150.1	20150.1	5.04425	6	36.8699	24739.8	24739.8	4.87214	5	-116.565	14683	14683	4.40328	1136	1.7699e+06	1.7699e+06	6	36.8699	18090.2	18090.2	4.78605	6	-68.1986	16135	16135	5.05971	5	-90	9470.71	9470.71	4.43628	6	-104.036	15111.3	15111.3	4.60977
3.8	6	-53.1301	35570.1	35570.1	4.97572	6	11.3099	19302.3	19302.3	5.04425	6	36.8699	22222.7	22222.7	4.87214	5	-116.565	16280.1	16280.1	4.40328	1136	1.82249e+06	1.82249e+06	6	36.8699	22350	22350	4.78605	6	-68.1986	18904.4	18904.4	5.05971	5	-90	10366.8	10366.8	4.43628	6	-104.036	16505.9	16505.9	4.60977
4	6	-53.1301	43089.9	43089.9	4.97572	6	11.3099	20508.1	20508.1	5.04425	6	36.8699	21510.9	21510.9	4.87214	5	-116.565	15282.8	15282.8	4.40328	1136	1.75344e+06	1.75344e+06	6	36.8699	15339.3	15339.3	4.78605	6	-68.1986	17149.5	17149.5	5.05971	5	-90	8099.4	8099.4	4.43628	6	-104.036	13794.8	13794.8	4.60977
4.2	6	-53.1301	32395.4	32395.4	4.97572	6	11.3099	17520.8	17520.8	5.04425	6	36.8699	19778.3	19778.3	4.87214	5	-116.565	14381.2	14381.2	4.40328	1136	1.73085e+06	1.73085e+06	6	36.8699	14503.2	14503.2	4.78605	6	-68.1986	15655	15655	5.05971	5	-90	12429	12429	4.43628	6	-104.036	13562.5	13562.5	4.60977
4.4	6	-53.1301	34286.9	34286.9	4.97572	6	11.3099	18757.1	18757.1	5.04425	6	36.8699	20811.2	20811.2	4.87214	5	-116.565	10496.7	10496.7	4.40328	1136	1.73559e+06	1.73559e+06	6	36.8699	15283.2	15283.2	4.78605	6	-68.1986	18757.7	18757.7	5.05971	5	-90	9863.99	9863.99	4.43628	6	-104.036	14053	14053	4.60977
4.6	6	-53.1301	25066.5	25066.5	4.97572	6	11.3099	17438.8	17438.8	5.04425	6	36.8699	18074.7	18074.7	4.87214	5	-116.565	11058.6	11058.6	4.40328	1136	1.81383e+06	1.81383e+06	6	36.8699	20047.3	20047.3	4.78605	6	-68.1986	13933.3	13933.3	5.05971	5	-90	12361.8	12361.8	4.43628	6	-104.036	14274	14274	4.60977
4.8	6	-53.1301	21534.5	21534.5	4.97572	6	11.3099	22965.5	22965.5	5.04425	6	36.8699	17287.9	17287.9	4.87214	5	-116.565	12904.7	12904.7	4.40328	1136	1.72317e+06	1.72317e+06	6	36.8699	17286.7	17286.7	4.78605	6	-68.1986	14077.5	14077.5	5.05971	5	-90	12084	12084	4.43628	6	-104.036	13156.1	13156.1	4.60977
5	6	-53.1301	28679.7	28679.7	4.97572	6	11.3099	20198.2	20198.2	5.04425	6	36.8699	21062.7	21062.7	4.87214	5	-116.565	12062	12062	4.40328	1136	1.75444e+06	1.75444e+06	6	36.8699	13709	13709	4.78605	6	-68.1986	16952.3	16952.3	5.05971	5	-90	18645.7	18645.7	4.43628	6	-104.036	15492.6	15492.6	4.60977
5.2	6	-53.1301	25453.3	25453.3	4.97572	6	11.3099	18865.5	18865.5	5.04425	6	36.8699	19155.8	19155.8	4.87214	5	-116.565	11379.7	11379.7	4.40328	1136	1.80894e+06	1.80894e+06	6	36.8699	15287.9	15287.9	4.78605	6	-68.1986	16124.3	16124.3	5.05971	5	-90	12822.4	12822.4	4.43628	6	-104.036	16114.9	16114.9	4.60977
5.4	6	-53.1301	23749.4	23749.4	4.97572	6	11.3099	19771.6	19771.6	5.04425	6	36.8699	21346.7	21346.7	4.87214	5	-116.565	14969.5	14969.5	4.40328	1136	1771529	1771529	6	36.8699	16779.2	16779.2	4.78605	6	-68.1986	15628.2	15628.2	5.05971	5	-90	12119.4	12119.4	4.43628	6	-104.036	16040.2	16040.2	4.60977
5.6	6	-53.1301	26388.6	26388.6	4.97572	6	11.3099	18202.9	18202.9	5.04425	6	36.8699	19185.5	19185.5	4.87214	5	-116.565	15278.4	15278.4	4.40328	1136	1823559	1823559	6	36.8699	20256.7	20256.7	4.78605	6	-68.1986	13313	13313	5.05971	5	-90	12745.7	12745.7	4.43628	6	-104.036	14852.8	14852.8	4.60977
5.8	6	-53.1301	23803.8	23803.8	4.97572	6	11.3099	20352.5	20352.5	5.04425	6	36.8699	17426.6	17426.6	4.87214	5	-116.565	17343.8	17343.8	4.40328	1136	1.80997e+06	1.80997e+06	6	36.8699	19850.7	19850.7	4.78605	6	-68.1986	15653.7	15653.7	5.05971	5	-90	14622.5	14622.5	4.43628	6	-104.036	14574.3	14574.3	4.60977
6	6	-53.1301	22155.3	22155.3	4.97572	6	11.3099	15784.8	15784.8	5.04425	6	36.8699	23163.3	23163.3	4.87214	5	-116.565	8413.97	8413.97	4.40328	1136	1.74727e+06	1.74727e+06	6	36.8699	18707.2	18707.2	4.78605	6	-68.1986	14410.4	14410.4	5.05971	5	-90	13539.6	13539.6	4.43628	6	-104.036	14657.9	14657.9	4.60977
6.2	6	-53.1301	19721	19721	4.97572	6	11.3099	20418.8	20418.8	5.04425	6	36.8699	20277	20277	4.87214	5	-116.565	12099.2	12099.2	4.40328	1136	1.81741e+06	1.81741e+06	6	36.8699	13884.2	13884.2	4.78605	6	-68.1986	13803.5	13803.5	5.05971	5	-90	15353.5	15353.5	4.43628	6	-104.036	13764.1	13764.1	4.60977
6.4	6	-53.1301	18350.3	18350.3	4.97572	6	11.3099	19756.8	19756.8	5.04425	6	36.8699	18027	18027	4.87214	5	-116.565	10923.5	10923.5	4.40328	1136	1.78569e+06	1.78569e+06	6	36.8699	17130.2	17130.2	4.78605	6	-68.1986	12685.4	12685.4	5.05971	5	-90	13463.5	13463.5	4.43628	6	-104.036	15415.3	15415.3	4.60977
6.6	6	-53.1301	12300.3	12300.3	4.97572	6	11.3099	17282.3	17282.3	5.04425	6	36.8699	23791.2	23791.2	4.87214	5	-116.565	12336.5	12336.5	4.40328	1136	1.77935e+06	1.77935e+06	6	36.8699	20366.5	20366.5	4.78605	6	-68.1986	14943.5	14943.5	5.05971	5	-90	12826.2	12826.2	4.43628	6	-104.036	13427.3	13427.3	4.60977
6.8	6	-53.1301	13906.2	13906.2	4.97572	6	11.3099	17685.4	17685.4	5.04425	6	36.8699	28548	28548	4.87214	5	-116.565	12291.5	12291.5	4.40328	1136	1.81921e+06	1.81921e+06	6	36.8699	20327	20327	4.78605	6	-68.1986	14605.4	14605.4	5.05971	5	-90	13199.5	13199.5	4.43628	6	-104.036	16030.9	16030.9	4.60977
7	6	-53.1301	18976.7	18976.7	4.97572	6	11.3099	16261.2	16261.2	5.04425	6	36.8699	25633.3	25633.3	4.87214	5	-116.565	15609.7	15609.7	4.40328	1136	1.81183e+06	1.81183e+06	6	36.8699	18796.9	18796.9	4.78605	6	-68.1986	15165.4	15165.4	5.05971	5	-90	11617.1	11617.1	4.43628	6	-104.036	13664.5	13664.5	4.60977
7.2	6	-53.1301	22119.7	22119.7	4.97572	6	11.3099	15167.4	15167.4	5.04425	6	36.8699	18042.4	18042.4	4.87214	5	-116.565	10873.6	10873.6	4.40328	1136	1.80117e+06	1.80117e+06	6	36.8699	16976.6	16976.6	4.78605	6	-68.1986	16394.2	16394.2	5.05971	5	-90	13924.1	13924.1	4.43628	6	-104.036	17925.7	17925.7	4.60977
7.4	6	-53.1301	28006.2	28006.2	4.97572	6	11.3099	20854.1	20854.1	5.04425	6	36.8699	18460.5	18460.5	4.87214	5	-116.565	15136.2	15136.2	4.40328	1136	1.78327e+06	1.78327e+06	6	36.8699	20221.3	20221.3	4.78605	6	-68.1986	15869	15869	5.05971	5	-90	11823.6	11823.6	4.43628	6	-104.036	17531	17531	4.60977
7.6	6	-53.1301	21979.8	21979.8	4.97572	6	11.3099	18066.6	18066.6	5.04425	6	36.8699	15016.9	15016.9	4.87214	5	-116.565	11237.3	11237.3	4.40328	1136	1.76928e+06	1.76928e+06	6	36.8699	18760.4	18760.4	4.78605	6	-68.1986	15539.7	15539.7	5.05971	5	-90	12334.7	12334.7	4.43628	6	-104.036	17154.8	17154.8	4.60977
7.8	6	-53.1301	19352.3	19352.3	4.97572	6	11.3099	12505.7	12505.7	5.04425	6	36.8699	18518.9	18518.9	4.87214	5	-116.565	10574.2	10574.2	4.40328	1136	1.75513e+06	1.75513e+06	6	36.8699	18558.6	18558.6	4.78605	6	-68.1986	13165.2	13165.2	5.05971	5	-90	12795.7	12795.7	4.43628	6	-104.036	13757.1	13757.1	4.60977
8	6	-53.1301	19168.4	19168.4	4.97572	6	11.3099	16514.6	16514.6	5.04425	6	36.8699	14719.3	14719.3	4.87214	5	-116.565	11952.4	11952.4	4.40328	1136	1.81492e+06	1.81492e+06	6	36.8699	17284.6	17284.6	4.78605	6	-68.1986	16155.5	16155.5	5.05971	5	-90	14570	14570	4.43628	6	-104.036	15766.2	15766.2	4.60977
8.2	6	-53.1301	18900.4	18900.4	4.97572	6	11.3099	15600.9	15600.9	5.04425	6	36.8699	21370.5	21370.5	4.87214	5	-116.565	11233.9	11233.9	4.40328	1136	1.80843e+06	1.80843e+06	6	36.8699	15212.1	15212.1	4.78605	6	-68.1986	15556.8	15556.8	5.05971	5	-90	11570.7	11570.7	4.43628	6	-104.036	12951.7	12951.7	4.60977
8.4	6	-53.1301	21762.4	21762.4	4.97572	6	11.3099	18206.9	18206.9	5.04425	6	36.8699	14246.9	14246.9	4.87214	5	-116.565	12210.8	12210.8	4.40328	1136	1833238	1833238	6	36.8699	15224.7	15224.7	4.78605	6	-68.1986	17778.9	17778.9	5.05971	5	-90	11147.1	11147.1	4.43628	6	-104.036	12708.7	12708.7	4.60977
8.6	6	-53.1301	21466.3	21466.3	4.97572	6	11.3099	13481.5	13481.5	5.04425	6	36.8699	21017.6	21017.6	4.87214	5	-116.565	14888.1	14888.1	4.40328	1136	1.839e+06	1.839e+06	6	36.8699	14019.9	14019.9	4.78605	6	-68.1986	17800.3	17800.3	5.05971	5	-90	13164.3	13164.3	4.43628	6	-104.036	15062.5	15062.5	4.60977
8.8	6	-53.1301	27085.4	27085.4	4.97572	6	11.3099	13346.5	13346.5	5.04425	6	36.8699	26102.1	26102.1	4.87214	5	-116.565	12602.8	12602.8	4.40328	1136	1.7807e+06	1.7807e+06	6	36.8699	13572	13572	4.78605	6	-68.1986	14088.3	14088.3	5.05971	5	-90	10060.1	10060.1	4.43628	6	-104.036	15095.8	15095.8	4.60977
9	6	-53.1301	23766.4	23766.4	4.97572	6	11.3099	13964.6	13964.6	5.04425	6	36.8699	26375.5	26375.5	4.87214	5	-116.565	13146.6	13146.6	4.40328	1136	1.75382e+06	1.75382e+06	6	36.8699	12381.1	12381.1	4.78605	6	-68.1986	17578.1	17578.1	5.05971	5	-90	12381.2	12381.2	4.43628	6	-104.036	14264.1	14264.1	4.60977
9.2	6	-53.1301	26573.5	26573.5	4.97572	6	11.3099	16285.6	16285.6	5.04425	6	36.8699	19371.4	19371.4	4.87214	5	-116.565	11936.9	11936.9	4.40328	1136	1.81049e+06	1.81049e+06	6	36.8699	14171	14171	4.78605	6	-68.1986	15397.9	15397.9	5.05971	5	-90	12111.9	12111.9	4.43628	6	-104.036	16384.2	16384.2	4.60977
9.4	6	-53.1301	24119.8	24119.8	4.97572	6	11.3099	15245.8	15245.8	5.04425	6	36.8699	22565.8	22565.8	4.87214	5	-116.565	8934.65	8934.65	4.40328	1136	1.87022e+06	1.87022e+06	6	36.8699	14471.8	14471.8	4.78605	6	-68.1986	16387.1	16387.1	5.05971	5	-90	12566.6	12566.6	4.43628	6	-104.036	15354.8	15354.8	4.60977
9.6	6	-53.1301	23768.1	23768.1	4.97572	6	11.3099	23373.4	23373.4	5.04425	6	36.8699	17415.7	17415.7	4.87214	5	-116.565	11737.9	11737.9	4.40328	1136	1.82181e+06	1.82181e+06	6	36.8699	13273.8	13273.8	4.78605	6	-68.1986	17724.8	17724.8	5.05971	5	-90	12486.3	12486.3	4.43628	6	-104.036	10551.4	10551.4	4.60977
9.8	6	-53.1301	23169.3	23169.3	4.97572	6	11.3099	22984.2	22984.2	5.04425	6	36.8699	22070.9	22070.9	4.87214	5	-116.565	13853.6	13853.6	4.40328	1136	1.72477e+06	1.72477e+06	6	36.8699	14616.3	14616.3	4.78605	6	-68.1986	16983.8	16983.8	5.05971	5	-90	11706.8	11706.8	4.43628	6	-104.036	15650.5	15650.5	4.60977
10	6	-53.1301	28036.6	28036.6	4.97572	6	11.3099	16871.9	16871.9	5.04425	6	36.8699	21826.7	21826.7	4.87214	5	-116.565	9747.87	9747.87	4.40328	1136	1.72227e+06	1.72227e+06	6	36.8699	16626.8	16626.8	4.78605	6	-68.1986	18790.1	18790.1	5.05971	5	-90	10975.9	10975.9	4.43628	6	-104.036	14261.2	14261.2	4.60977
10.2	6	-53.1301	34409	34409	4.97572	6	11.3099	19763.5	19763.5	5.04425	6	36.8699	18992.4	18992.4	4.87214	5	-116.565	14263	14263	4.40328	1136	1.8191e+06	1.8191e+06	6	36.8699	17265.4	17265.4	4.78605	6	-68.1986	15444.9	15444.9	5.05971	5	-90	9345.79	9345.79	4.43628	6	-104.036	18307.4	18307.4	4.60977
10.4	6	-53.1301	31537.9	31537.9	4.97572	6	11.3099	16415.6	16415.6	5.04425	6	36.8699	21528.6	21528.6	4.87214	5	-116.565	10332	10332	4.40328	1136	1.76632e+06	1.76632e+06	6	36.8699	18755.7	18755.7	4.78605	6	-68.1986	13804.9	13804.9	5.05971	5	-90	10781	10781	4.43628	6	-104.036	10699.2	10699.2	4.60977
10.6	6	-53.1301	26186.5	26186.5	4.97572	6	11.3099	21512.1	21512.1	5.04425	6	36.8699	14601.7	14601.7	4.87214	5	-116.565	10813.3	10813.3	4.40328	1136	1.76175e+06	1.76175e+06	6	36.8699	14882.1	14882.1	4.78605	6	-68.1986	14141.5	14141.5	5.05971	5	-90	12225.8	12225.8	4.43628	6	-104.036	12038.7	12038.7	4.60977
10.8	6	-53.1301	24274.9	24274.9	4.97572	6	11.3099	18822.9	18822.9	5.04425	6	36.8699	21447.9	21447.9	4.87214	5	-116.565	14646	14646	4.40328	1136	1.78309e+06	1.78309e+06	6	36.8699	17764.3	17764.3	4.78605	6	-68.1986	17826.3	17826.3	5.05971	5	-90	10854.6	10854.6	4.43628	6	-104.036	16505.5	16505.5	4.60977
11	6	-53.1301	23338.8	23338.8	4.97572	6	11.3099	17783.8	17783.8	5.04425	6	36.8699	26634	26634	4.87214	5	-116.565	9817.99	9817.99	4.40328	1136	1.83084e+06	1.83084e+06	6	36.8699	15707.2	15707.2	4.78605	6	-68.1986	16459.5	16459.5	5.05971	5	-90	14300.8	14300.8	4.43628	6	-104.036	14795.3	14795.3	4.60977
11.2	6	-53.1301	20273.3	20273.3	4.97572	6	11.3099	17175.2	17175.2	5.04425	6	36.8699	23126.8	23126.8	4.87214	5	-116.565	11303.9	11303.9	4.40328	1136	1.82629e+06	1.82629e+06	6	36.8699	18322.3	18322.3	4.78605	6	-68.1986	13302	13302	5.05971	5	-90	9578.16	9578.16	4.43628	6	-104.036	16724.3	16724.3	4.60977
11.4	6	-53.1301	14211.9	14211.9	4.97572	6	11.3099	20381.4	20381.4	5.04425	6	36.8699	19281.4	19281.4	4.87214	5	-116.565	10052.5	10052.5	4.40328	1136	1.79486e+06	1.79486e+06	6	36.8699	17672.4	17672.4	4.78605	6	-68.1986	14483.4	14483.4	5.05971	5	-90	10920.3	10920.3	4.43628	6	-104.036	14123.5	14123.5	4.60977
11.6	6	-53.1301	20524.4	20524.4	4.97572	6	11.3099	19748.6	19748.6	5.04425	6	36.8699	18253.8	18253.8	4.87214	5	-116.565	11508.3	11508.3	4.40328	1136	1.7924e+06	1.7924e+06	6	36.8699	16006.1	16006.1	4.78605	6	-68.1986	16184.3	16184.3	5.05971	5	-90	11222.1	11222.1	4.43628	6	-104.036	18062.2	18062.2	4.60977
11.8	6	-53.1301	22469.2	22469.2	4.97572	6	11.3099	23048.1	23048.1	5.04425	6	36.8699	17310.9	17310.9	4.87214	5	-116.565	11798.8	11798.8	4.40328	1136	1.8391e+06	1.8391e+06	6	36.8699	17479.8	17479.8	4.78605	6	-68.1986	14078.7	14078.7	5.05971	5	-90	13730.4	13730.4	4.43628	6	-104.036	11816.9	11816.9	4.60977
12	6	-53.1301	19890.1	19890.1	4.97572	6	11.3099	17530	17530	5.04425	6	36.8699	19478	19478	4.87214	5	-116.565	15473.6	15473.6	4.40328	1136	1.80232e+06	1.80232e+06	6	36.8699	13868.1	13868.1	4.78605	6	-68.1986	13399.3	13399.3	5.05971	5	-90	12957.6	12957.6	4.43628	6	-104.036	14058.4	14058.4	4.60977
12.2	6	-53.1301	23593.3	23593.3	4.97572	6	11.3099	21946.4	21946.4	5.04425	6	36.8699	17354.9	17354.9	4.87214	5	-116.565	12549.3	12549.3	4.40328	1136	1.80704e+06	1.80704e+06	6	36.8699	16495.6	16495.6	4.78605	6	-68.1986	16790.2	16790.2	5.05971	5	-90	13681.1	13681.1	4.43628	6	-104.036	12094.4	12094.4	4.60977
12.4	6	-53.1301	27656.4	27656.4	4.97572	6	11.3099	20890.3	20890.3	5.04425	6	36.8699	17535.8	17535.8	4.87214	5	-116.565	11770.5	11770.5	4.40328	1136	1.88939e+06	1.88939e+06	6	36.8699	13370.4	13370.4	4.78605	6	-68.1986	15474.2	15474.2	5.05971	5	-90	16868.5	16868.5	4.43628	6	-104.036	14405.9	14405.9	4.60977
12.6	6	-53.1301	26431.8	26431.8	4.97572	6	11.3099	21972	21972	5.04425	6	36.8699	14723.2	14723.2	4.87214	5	-116.565	10195.9	10195.9	4.40328	1136	1.78285e+06	1.78285e+06	6	36.8699	14984.4	14984.4	4.78605	6	-68.1986	17919.5	17919.5	5.05971	5	-90	18380.5	18380.5	4.43628	6	-104.036	15218.1	15218.1	4.60977
12.8	6	-53.1301	23396.7	23396.7	4.97572	6	11.3099	15188.8	15188.8	5.04425	6	36.8699	19368	19368	4.87214	5	-116.565	14588.3	14588.3	4.40328	1136	1.78982e+06	1.78982e+06	6	36.8699	16841.5	16841.5	4.78605	6	-68.1986	15280.4	15280.4	5.05971	5	-90	16187.6	16187.6	4.43628	6	-104.036	13077	13077	4.60977
13	6	-53.1301	22190.2	22190.2	4.97572	6	11.3099	17791.2	17791.2	5.04425	6	36.8699	19959.7	19959.7	4.87214	5	-116.565	15907.3	15907.3	4.40328	1136	1800324	1800324	6	36.8699	14330.2	14330.2	4.78605	6	-68.1986	17687	17687	5.05971	5	-90	15481.1	15481.1	4.43628	6	-104.036	15859.7	15859.7	4.60977
13.2	6	-53.1301	18035.4	18035.4	4.97572	6	11.3099	19649.1	19649.1	5.04425	6	36.8699	15456.6	15456.6	4.87214	5	-116.565	14090.1	14090.1	4.40328	1136	1845173	1845173	6	36.8699	19142.8	19142.8	4.78605	6	-68.1986	19193.7	19193.7	5.05971	5	-90	12069.4	12069.4	4.43628	6	-104.036	16870.2	16870.2	4.60977
13.4	6	-53.1301	17339.2	17339.2	4.97572	6	11.3099	13542	13542	5.04425	6	36.8699	15522.5	15522.5	4.87214	5	-116.565	12683.1	12683.1	4.40328	1136	1.79863e+06	1.79863e+06	6	36.8699	16764.6	16764.6	4.78605	6	-68.1986	18904.3	18904.3	5.05971	5	-90	12001.4	12001.4	4.43628	6	-104.036	14488.7	14488.7	4.60977
13.6	6	-53.1301	12728.7	12728.7	4.97572	6	11.3099	16418.8	16418.8	5.04425	6	36.8699	20603.6	20603.6	4.87214	5	-116.565	12837.1	12837.1	4.40328	1136	1.82681e+06	1.82681e+06	6	36.8699	15604.6	15604.6	4.78605	6	-68.1986	19118.4	19118.4	5.05971	5	-90	12908.6	12908.6	4.43628	6	-104.036	18603	18603	4.60977
13.8	6	-53.1301	13557.6	13557.6	4.97572	6	11.3099	16261.6	16261.6	5.04425	6	36.8699	14321.7	14321.7	4.87214	5	-116.565	11077.8	11077.8	4.40328	1136	1.83118e+06	1.83118e+06	6	36.8699	15963.4	15963.4	4.78605	6	-68.1986	20644.6	20644.6	5.05971	5	-90	10602.9	10602.9	4.43628	6	-104.036	12641.9	12641.9	4.60977
14	6	-53.1301	14304.4	14304.4	4.97572	6	11.3099	17982.3	17982.3	5.04425	6	36.8699	16409.3	16409.3	4.87214	5	-116.565	10759.4	10759.4	4.40328	1136	1.82294e+06	1.82294e+06	6	36.8699	17312.8	17312.8	4.78605	6	-68.1986	14519.7	14519.7	5.05971	5	-90	13606	13606	4.43628	6	-104.036	14087.6	14087.6	4.60977
14.2	6	-53.1301	15080.8	15080.8	4.97572	6	11.3099	14396.3	14396.3	5.04425	6	36.8699	15231.6	15231.6	4.87214	5	-116.565	11758.5	11758.5	4.40328	1136	1.90115e+06	1.90115e+06	6	36.8699	14664.7	14664.7	4.78605	6	-68.1986	18346.3	18346.3	5.05971	5	-90	11468.6	11468.6	4.43628	6	-104.036	14518.3	14518.3	4.60977
14.4	6	-53.1301	21671.5	21671.5	4.97572	6	11.3099	17188.6	17188.6	5.04425	6	36.8699	18582.6	18582.6	4.87214	5	-116.565	12493.7	12493.7	4.40328	1136	1861068	1861068	6	36.8699	11949.4	11949.4	4.78605	6	-68.1986	19038.1	19038.1	5.05971	5	-90	12986.1	12986.1	4.43628	6	-104.036	13252.6	13252.6	4.60977
14.6	6	-53.1301	19223.4	19223.4	4.97572	6	11.3099	17196.7	17196.7	5.04425	6	36.8699	21411.6	21411.6	4.87214	5	-116.565	10523.3	10523.3	4.40328	1136	1.90449e+06	1.90449e+06	6	36.8699	14518.7	14518.7	4.78605	6	-68.1986	19440.1	19440.1	5.05971	5	-90	13521.8	13521.8	4.43628	6	-104.036	14911	14911	4.60977
14.8	6	-53.1301	16479.7	16479.7	4.97572	6	11.3099	16163	16163	5.04425	6	36.8699	17352	17352	4.87214	5	-116.565	11871.2	11871.2	4.40328	1136	1865610	1865610	6	36.8699	17888.6	17888.6	4.78605	6	-68.1986	18484.6	18484.6	5.05971	5	-90	12146.9	12146.9	4.43628	6	-104.036	14519.6	14519.6	4.60977
15	6	-53.1301	14446.9	14446.9	4.97572	6	11.3099	15935.4	15935.4	5.04425	6	36.8699	20607	20607	4.87214	5	-116.565	15194.1	15194.1	4.40328	1136	1.92102e+06	1.92102e+06	6	36.8699	16184.1	16184.1	4.78605	6	-68.1986	18825.8	18825.8	5.05971	5	-90	14651.5	14651.5	4.43628	6	-104.036	13288.1	13288.1	4.60977
15.2	6	-53.1301	15924.2	15924.2	4.97572	6	11.3099	12932.9	12932.9	5.04425	6	36.8699	17087.6	17087.6	4.87214	5	-116.565	13433.5	13433.5	4.40328	1136	1.85464e+06	1.85464e+06	6	36.8699	14515.1	14515.1	4.78605	6	-68.1986	17874.4	17874.4	5.05971	5	-90	14686.5	14686.5	4.43628	6	-104.036	13644.5	13644.5	4.60977
15.4	6	-53.1301	16245.5	16245.5	4.97572	6	11.3099	15723.2	15723.2	5.04425	6	36.8699	19224.6	19224.6	4.87214	5	-116.565	14581.2	14581.2	4.40328	1136	1.84826e+06	1.84826e+06	6	36.8699	15984.3	15984.3	4.78605	6	-68.1986	16250.4	16250.4	5.05971	5	-90	15659.2	15659.2	4.43628	6	-104.036	11615.1	11615.1	4.60977
15.6	6	-53.1301	17526.4	17526.4	4.97572	6	11.3099	17394.8	17394.8	5.04425	6	36.8699	17076.1	17076.1	4.87214	5	-116.565	15102.4	15102.4	4.40328	1136	1.86044e+06	1.86044e+06	6	36.8699	15676.5	15676.5	4.78605	6	-68.1986	18337.7	18337.7	5.05971	5	-90	19752.7	19752.7	4.43628	6	-104.036	14384	14384	4.60977
15.8	6	-53.1301	15255.5	15255.5	4.97572	6	11.3099	16721.8	16721.8	5.04425	6	36.8699	22478.5	22478.5	4.87214	5	-116.565	8764.73	8764.73	4.40328	1136	1.836e+06	1.836e+06	6	36.8699	13723.8	13723.8	4.78605	6	-68.1986	15188.9	15188.9	5.05971	5	-90	17641.2	17641.2	4.43628	6	-104.036	16973.6	16973.6	4.60977
16	6	-53.1301	15180.7	15180.7	4.97572	6	11.3099	18440.3	18440.3	5.04425	6	36.8699	21566.2	21566.2	4.87214	5	-116.565	10626.2	10626.2	4.40328	1136	1.86351e+06	1.86351e+06	6	36.8699	17443.4	17443.4	4.78605	6	-68.1986	16272.5	16272.5	5.05971	5	-90	19208.8	19208.8	4.43628	6	-104.036	19601.7	19601.7	4.60977
16.2	6	-53.1301	19716.8	19716.8	4.97572	6	11.3099	18115.9	18115.9	5.04425	6	36.8699	17004.4	17004.4	4.87214	5	-116.565	9613.55	9613.55	4.40328	1136	1.81271e+06	1.81271e+06	6	36.8699	17355.5	17355.5	4.78605	6	-68.1986	19379.5	19379.5	5.05971	5	-90	23326	23326	4.43628	6	-104.036	16668.7	16668.7	4.60977
16.4	6	-53.1301	21253	21253	4.97572	6	11.3099	14996.9	14996.9	5.04425	6	36.8699	21417	21417	4.87214	5	-116.565	10188	10188	4.40328	1136	1.86033e+06	1.86033e+06	6	36.8699	15180.8	15180.8	4.78605	6	-68.1986	16233.8	16233.8	5.05971	5	-90	24650	24650	4.43628	6	-104.036	27747.7	27747.7	4.60977
16.6	6	-53.1301	23737.3	23737.3	4.97572	6	11.3099	16388.4	16388.4	5.04425	6	36.8699	19255.2	19255.2	4.87214	5	-116.565	12646.8	12646.8	4.40328	1136	1.89289e+06	1.89289e+06	6	36.8699	13381.2	13381.2	4.78605	6	-68.1986	19458.6	19458.6	5.05971	5	-90	23834.6	23834.6	4.43628	6	-104.036	25883.2	25883.2	4.60977
16.8	6	-53.1301	29131.5	29131.5	4.97572	6	11.3099	19033.8	19033.8	5.04425	6	36.8699	20917	20917	4.87214	5	-116.565	12807.8	12807.8	4.40328	1136	1848756	1848756	6	36.8699	15713.4	15713.4	4.78605	6	-68.1986	17647.5	17647.5	5.05971	5	-90	24585.7	24585.7	4.43628	6	-104.036	14599	14599	4.60977
17	6	-53.1301	21626.6	21626.6	4.97572	6	11.3099	14564.4	14564.4	5.04425	6	36.8699	17240.8	17240.8	4.87214	5	-116.565	13478.2	13478.2	4.40328	1136	1857068	1857068	6	36.8699	13085.3	13085.3	4.78605	6	-68.1986	18794.3	18794.3	5.05971	5	-90	21965.5	21965.5	4.43628	6	-104.036	12727.7	12727.7	4.60977
17.2	6	-53.1301	20746.1	20746.1	4.97572	6	11.3099	18918.9	18918.9	5.04425	6	36.8699	21036	21036	4.87214	5	-116.565	12948.2	12948.2	4.40328	1136	1842236	1842236	6	36.8699	14512.2	14512.2	4.78605	6	-68.1986	20573.4	20573.4	5.05971	5	-90	18559.3	18559.3	4.43628	6	-104.036	15401.2	15401.2	4.60977
17.4	6	-53.1301	19175.9	19175.9	4.97572	6	11.3099	18579.5	18579.5	5.04425	6	36.8699	21584.5	21584.5	4.87214	5	-116.565	13133.5	13133.5	4.40328	1136	1.78375e+06	1.78375e+06	6	36.8699	15864.5	15864.5	4.78605	6	-68.1986	19450.7	19450.7	5.05971	5	-90	17747.4	17747.4	4.43628	6	-104.036	15174.7	15174.7	4.60977
17.6	6	-53.1301	25303.7	25303.7	4.97572	6	11.3099	18627.8	18627.8	5.04425	6	36.8699	22017.6	22017.6	4.87214	5	-116.565	11382	11382	4.40328	1136	1.86571e+06	1.86571e+06	6	36.8699	16020.8	16020.8	4.78605	6	-68.1986	18139.4	18139.4	5.05971	5	-90	15783.6	15783.6	4.43628	6	-104.036	20006.8	20006.8	4.60977
17.8	6	-53.1301	19730.8	19730.8	4.97572	6	11.3099	19127.5	19127.5	5.04425	6	36.8699	21267.1	21267.1	4.87214	5	-116.565	10213	10213	4.40328	1136	1.88682e+06	1.88682e+06	6	36.8699	18931.1	18931.1	4.78605	6	-68.1986	24351.1	24351.1	5.05971	5	-90	21358	21358	4.43628	6	-104.036	21991.9	21991.9	4.60977
18	6	-53.1301	17240.9	17240.9	4.97572	6	11.3099	23497.9	23497.9	5.04425	6	36.8699	18446.6	18446.6	4.87214	5	-116.565	14631.3	14631.3	4.40328	1136	1.91066e+06	1.91066e+06	6	36.8699	21229.6	21229.6	4.78605	6	-68.1986	24264.8	24264.8	5.05971	5	-90	15148.1	15148.1	4.43628	6	-104.036	25192.9	25192.9	4.60977
18.2	6	-53.1301	14670	14670	4.97572	6	11.3099	22384.7	22384.7	5.04425	6	36.8699	21887.9	21887.9	4.87214	5	-116.565	16177.2	16177.2	4.40328	1136	1.87174e+06	1.87174e+06	6	36.8699	16936	16936	4.78605	6	-68.1986	20802	20802	5.05971	5	-90	18433.2	18433.2	4.43628	6	-104.036	31131.8	31131.8	4.60977
18.4	6	-53.1301	16070.9	16070.9	4.97572	6	11.3099	16471.8	16471.8	5.04425	6	36.8699	23115.6	23115.6	4.87214	5	-116.565	13633.2	13633.2	4.40328	1136	1.84837e+06	1.84837e+06	6	36.8699	16203.5	16203.5	4.78605	6	-68.1986	20747.2	20747.2	5.05971	5	-90	19623.1	19623.1	4.43628	6	-104.036	24292	24292	4.60977
18.6	6	-53.1301	16461.5	16461.5	4.97572	6	11.3099	18355	18355	5.04425	6	36.8699	21644.1	21644.1	4.87214	5	-116.565	11859.8	11859.8	4.40328	1136	1.9277e+06	1.9277e+06	6	36.8699	16195.4	16195.4	4.78605	6	-68.1986	25892.9	25892.9	5.05971	5	-90	21520.6	21520.6	4.43628	6	-104.036	23081	23081	4.60977
18.8	6	-53.1301	15548.4	15548.4	4.97572	6	11.3099	19103.6	19103.6	5.04425	6	36.8699	20887.8	20887.8	4.87214	5	-116.565	11907.9	11907.9	4.40328	1136	1.88722e+06	1.88722e+06	6	36.8699	17549.2	17549.2	4.78605	6	-68.1986	19997.8	19997.8	5.05971	5	-90	17832.4	17832.4	4.43628	6	-104.036	21943.4	21943.4	4.60977
19	6	-53.1301	16262.7	16262.7	4.97572	6	11.3099	22724.9	22724.9	5.04425	6	36.8699	20165.8	20165.8	4.87214	5	-116.565	11077.6	11077.6	4.40328	1136	1.85303e+06	1.85303e+06	6	36.8699	16046	16046	4.78605	6	-68.1986	21104.3	21104.3	5.05971	5	-90	21010	21010	4.43628	6	-104.036	29688.2	29688.2	4.60977
19.2	6	-53.1301	15868.8	15868.8	4.97572	6	11.3099	16753.7	16753.7	5.04425	6	36.8699	21632.6	21632.6	4.87214	5	-116.565	12441.5	12441.5	4.40328	1136	1828806	1828806	6	36.8699	14980.9	14980.9	4.78605	6	-68.1986	21139.3	21139.3	5.05971	5	-90	19250.6	19250.6	4.43628	6	-104.036	21341.9	21341.9	4.60977
19.4	6	-53.1301	15240.1	15240.1	4.97572	6	11.3099	22123.8	22123.8	5.04425	6	36.8699	21456.1	21456.1	4.87214	5	-116.565	16008.1	16008.1	4.40328	1136	1.86315e+06	1.86315e+06	6	36.8699	15569.5	15569.5	4.78605	6	-68.1986	22925.3	22925.3	5.05971	5	-90	17751.3	17751.3	4.43628	6	-104.036	25600.5	25600.5	4.60977
19.6	6	-53.1301	19030.1	19030.1	4.97572	6	11.3099	26000.6	26000.6	5.04425	6	36.8699	22620.2	22620.2	4.87214	5	-116.565	13975.9	13975.9	4.40328	1136	1.95531e+06	1.95531e+06	6	36.8699	21977.8	21977.8	4.78605	6	-68.1986	25982.9	25982.9	5.05971	5	-90	20464.7	20464.7	4.43628	6	-104.036	27275.5	27275.5	4.60977
19.8	6	-53.1301	16982.2	16982.2	4.97572	6	11.3099	21989.8	21989.8	5.04425	6	36.8699	23340.9	23340.9	4.87214	5	-116.565	12170.2	12170.2	4.40328	1136	1.96204e+06	1.96204e+06	6	36.8699	17494.6	17494.6	4.78605	6	-68.1986	26642.4	26642.4	5.05971	5	-90	23779	23779	4.43628	6	-104.036	21501.4	21501.4	4.60977
20	6	-53.1301	15521.9	15521.9	4.97572	6	11.3099	16672.6	16672.6	5.04425	6	36.8699	16878.6	16878.6	4.87214	5	-116.565	9893.32	9893.32	4.40328	1136	1.83854e+06	1.83854e+06	6	36.8699	19631.5	19631.5	4.78605	6	-68.1986	23695.7	23695.7	5.05971	5	-90	22549	22549	4.43628	6	-104.036	27226.8	27226.8	4.60977
20.2	6	-53.1301	20352.3	20352.3	4.97572	6	11.3099	18292.3	18292.3	5.04425	6	36.8699	20753.7	20753.7	4.87214	5	-116.565	12637.7	12637.7	4.40328	1136	1.81956e+06	1.81956e+06	6	36.8699	21140.4	21140.4	4.78605	6	-68.1986	23476.1	23476.1	5.05971	5	-90	18951.2	18951.2	4.43628	6	-104.036	21277.6	21277.6	4.60977
20.4	6	-53.1301	16419.1	16419.1	4.97572	6	11.3099	21427.3	21427.3	5.04425	6	36.8699	17818.6	17818.6	4.87214	5	-116.565	13746.5	13746.5	4.40328	1136	1817500	1817500	6	36.8699	18453	18453	4.78605	6	-68.1986	23698.2	23698.2	5.05971	5	-90	22163.9	22163.9	4.43628	6	-104.036	20053.7	20053.7	4.60977
20.6	6	-53.1301	14926.8	14926.8	4.97572	6	11.3099	23228.2	23228.2	5.04425	6	36.8699	10637	10637	4.87214	5	-116.565	15228.4	15228.4	4.40328	1136	1.9082e+06	1.9082e+06	6	36.8699	17112.9	17112.9	4.78605	6	-68.1986	26526.3	26526.3	5.05971	5	-90	17403.2	17403.2	4.43628	6	-104.036	21061	21061	4.60977
20.8	6	-53.1301	15248	15248	4.97572	6	11.3099	26935	26935	5.04425	6	36.8699	11412.8	11412.8	4.87214	5	-116.565	13832.3	13832.3	4.40328	1136	1.88039e+06	1.88039e+06	6	36.8699	14237.7	14237.7	4.78605	6	-68.1986	27808.3	27808.3	5.05971	5	-90	16957.9	16957.9	4.43628	6	-104.036	16227.8	16227.8	4.60977
21	6	-53.1301	13489.4	13489.4	4.97572	6	11.3099	24073.4	24073.4	5.04425	6	36.8699	14977.6	14977.6	4.87214	5	-116.565	14747.5	14747.5	4.40328	1136	1.79416e+06	1.79416e+06	6	36.8699	18288.9	18288.9	4.78605	6	-68.1986	23423	23423	5.05971	5	-90	22138	22138	4.43628	6	-104.036	19041.2	19041.2	4.60977
21.2	6	-53.1301	13400.9	13400.9	4.97572	6	11.3099	23861.8	23861.8	5.04425	6	36.8699	14390.8	14390.8	4.87214	5	-116.565	13713.7	13713.7	4.40328	1136	1.91882e+06	1.91882e+06	6	36.8699	17562.3	17562.3	4.78605	6	-68.1986	28026.1	28026.1	5.05971	5	-90	17802	17802	4.43628	6	-104.036	17393.1	17393.1	4.60977
21.4	6	-53.1301	10853.3	10853.3	4.97572	6	11.3099	26668.6	26668.6	5.04425	6	36.8699	15176.1	15176.1	4.87214	5	-116.565	15138.7	15138.7	4.40328	1136	1.85141e+06	1.85141e+06	6	36.8699	15677.2	15677.2	4.78605	6	-68.1986	29069.3	29069.3	5.05971	5	-90	17100.9	17100.9	4.43628	6	-104.036	14446.9	14446.9	4.60977
21.6	6	-53.1301	13080.1	13080.1	4.97572	6	11.3099	22965.5	22965.5	5.04425	6	36.8699	14817.4	14817.4	4.87214	5	-116.565	14588.2	14588.2	4.40328	1136	1.83026e+06	1.83026e+06	6	36.8699	17365	17365	4.78605	6	-68.1986	23040.8	23040.8	5.05971	5	-90	14189.1	14189.1	4.43628	6	-104.036	15577.1	15577.1	4.60977
21.8	6	-53.1301	12792.4	12792.4	4.97572	6	11.3099	19526.2	19526.2	5.04425	6	36.8699	12465	12465	4.87214	5	-116.565	13312.8	13312.8	4.40328	1136	1.83858e+06	1.83858e+06	6	36.8699	18365	18365	4.78605	6	-68.1986	24935.6	24935.6	5.05971	5	-90	22059	22059	4.43628	6	-104.036	15761	15761	4.60977
22	6	-53.1301	15962.6	15962.6	4.97572	6	11.3099	22809.5	22809.5	5.04425	6	36.8699	14884.8	14884.8	4.87214	5	-116.565	16889.1	16889.1	4.40328	1136	1.88947e+06	1.88947e+06	6	36.8699	17277.6	17277.6	4.78605	6	-68.1986	22669.3	22669.3	5.05971	5	-90	26284.9	26284.9	4.43628	6	-104.036	15086	15086	4.60977
22.2	6	-53.1301	17677.3	17677.3	4.97572	6	11.3099	16269.6	16269.6	5.04425	6	36.8699	15638.9	15638.9	4.87214	5	-116.565	12140.3	12140.3	4.40328	1136	1.85299e+06	1.85299e+06	6	36.8699	21544.3	21544.3	4.78605	6	-68.1986	27317.3	27317.3	5.05971	5	-90	27550.2	27550.2	4.43628	6	-104.036	16292.5	16292.5	4.60977
22.4	6	-53.1301	12461.7	12461.7	4.97572	6	11.3099	20373.6	20373.6	5.04425	6	36.8699	14792.1	14792.1	4.87214	5	-116.565	10651.5	10651.5	4.40328	1136	1.89174e+06	1.89174e+06	6	36.8699	23200	23200	4.78605	6	-68.1986	27858.6	27858.6	5.05971	5	-90	23030.4	23030.4	4.43628	6	-104.036	17018.4	17018.4	4.60977
22.6	6	-53.1301	11239.5	11239.5	4.97572	6	11.3099	20277.3	20277.3	5.04425	6	36.8699	22001.2	22001.2	4.87214	5	-116.565	13185.3	13185.3	4.40328	1136	1.91037e+06	1.91037e+06	6	36.8699	18528.2	18528.2	4.78605	6	-68.1986	27292.7	27292.7	5.05971	5	-90	16139.7	16139.7	4.43628	6	-104.036	13287.9	13287.9	4.60977
22.8	6	-53.1301	17716.5	17716.5	4.97572	6	11.3099	25006.9	25006.9	5.04425	6	36.8699	17082.2	17082.2	4.87214	5	-116.565	13102.4	13102.4	4.40328	1136	1.89214e+06	1.89214e+06	6	36.8699	16370.3	16370.3	4.78605	6	-68.1986	23443.5	23443.5	5.05971	5	-90	14524.3	14524.3	4.43628	6	-104.036	15033.3	15033.3	4.60977
23	6	-53.1301	15655.2	15655.2	4.97572	6	11.3099	22206.8	22206.8	5.04425	6	36.8699	17006.1	17006.1	4.87214	5	-116.565	12522.6	12522.6	4.40328	1136	1.95388e+06	1.95388e+06	6	36.8699	20447.6	20447.6	4.78605	6	-68.1986	25066.6	25066.6	5.05971	5	-90	14637.2	14637.2	4.43628	6	-104.036	13364.9	13364.9	4.60977
23.2	6	-53.1301	13999.8	13999.8	4.97572	6	11.3099	25447	25447	5.04425	6	36.8699	17956	17956	4.87214	5	-116.565	9932.99	9932.99	4.40328	1136	1827828	1827828	6	36.8699	19916.2	19916.2	4.78605	6	-68.1986	25275.8	25275.8	5.05971	5	-90	13349.4	13349.4	4.43628	6	-104.036	14611.5	14611.5	4.60977
23.4	6	-53.1301	14984.6	14984.6	4.97572	6	11.3099	21041.9	21041.9	5.04425	6	36.8699	17279.8	17279.8	4.87214	5	-116.565	10687.4	10687.4	4.40328	1136	1.92542e+06	1.92542e+06	6	36.8699	20932.3	20932.3	4.78605	6	-68.1986	20201.1	20201.1	5.05971	5	-90	15627.7	15627.7	4.43628	6	-104.036	17322.9	17322.9	4.60977
23.6	6	-53.1301	13726.5	13726.5	4.97572	6	11.3099	26576	26576	5.04425	6	36.8699	20987.2	20987.2	4.87214	5	-116.565	15828.3	15828.3	4.40328	1136	1.97589e+06	1.97589e+06	6	36.8699	19780.3	19780.3	4.78605	6	-68.1986	25872.7	25872.7	5.05971	5	-90	12890.2	12890.2	4.43628	6	-104.036	16154.6	16154.6	4.60977
23.8	6	-53.1301	12256.7	12256.7	4.97572	6	11.3099	22181.9	22181.9	5.04425	6	36.8699	17501.5	17501.5	4.87214	5	-116.565	15189.1	15189.1	4.40328	1136	1.84725e+06	1.84725e+06	6	36.8699	19520.7	19520.7	4.78605	6	-68.1986	21401	21401	5.05971	5	-90	13988.2	13988.2	4.43628	6	-104.036	15739.2	15739.2	4.60977
24	6	-53.1301	17059	17059	4.97572	6	11.3099	21887.8	21887.8	5.04425	6	36.8699	15256.2	15256.2	4.87214	5	-116.565	13089.5	13089.5	4.40328	1136	1.86442e+06	1.86442e+06	6	36.8699	18575.8	18575.8	4.78605	6	-68.1986	23348.9	23348.9	5.05971	5	-90	18948.6	18948.6	4.43628	6	-104.036	18516	18516	4.60977
24.2	6	-53.1301	13203.9	13203.9	4.97572	6	11.3099	22343	22343	5.04425	6	36.8699	18158.6	18158.6	4.87214	5	-116.565	13933.2	13933.2	4.40328	1136	1.89309e+06	1.89309e+06	6	36.8699	17207.5	17207.5	4.78605	6	-68.1986	22336.4	22336.4	5.05971	5	-90	20669.5	20669.5	4.43628	6	-104.036	15158.8	15158.8	4.60977
24.4	6	-53.1301	15371.6	15371.6	4.97572	6	11.3099	25069.4	25069.4	5.04425	6	36.8699	19674.3	19674.3	4.87214	5	-116.565	12104	12104	4.40328	1136	1.89806e+06	1.89806e+06	6	36.8699	19274.8	19274.8	4.78605	6	-68.1986	22841.6	22841.6	5.05971	5	-90	21902	21902	4.43628	6	-104.036	22637.3	22637.3	4.60977
24.6	6	-53.1301	13670.5	13670.5	4.97572	6	11.3099	20089.2	20089.2	5.04425	6	36.8699	25003.3	25003.3	4.87214	5	-116.565	15018.5	15018.5	4.40328	1136	1858537	1858537	6	36.8699	16018.7	16018.7	4.78605	6	-68.1986	25151.3	25151.3	5.05971	5	-90	17818.9	17818.9	4.43628	6	-104.036	13914.3	13914.3	4.60977
24.8	6	-53.1301	14035.1	14035.1	4.97572	6	11.3099	24002	24002	5.04425	6	36.8699	18412	18412	4.87214	5	-116.565	11241.3	11241.3	4.40328	1136	1.84309e+06	1.84309e+06	6	36.8699	15744.5	15744.5	4.78605	6	-68.1986	27536.1	27536.1	5.05971	5	-90	14227.3	14227.3	4.43628	6	-104.036	12174.8	12174.8	4.60977
25	6	-53.1301	18170	18170	4.97572	6	11.3099	19758.8	19758.8	5.04425	6	36.8699	17433.9	17433.9	4.87214	5	-116.565	13288.3	13288.3	4.40328	1136	1.82521e+06	1.82521e+06	6	36.8699	17292.9	17292.9	4.78605	6	-68.1986	22554.2	22554.2	5.05971	5	-90	15773.1	15773.1	4.43628	6	-104.036	14984.3	14984.3	4.60977
25.2	6	-53.1301	21624.9	21624.9	4.97572	6	11.3099	28499.5	28499.5	5.04425	6	36.8699	12776.6	12776.6	4.87214	5	-116.565	13797.8	13797.8	4.40328	1136	1.87844e+06	1.87844e+06	6	36.8699	17906.2	17906.2	4.78605	6	-68.1986	21571.1	21571.1	5.05971	5	-90	16510.3	16510.3	4.43628	6	-104.036	17953.4	17953.4	4.60977
25.4	6	-53.1301	26854.9	26854.9	4.97572	6	11.3099	22510.2	22510.2	5.04425	6	36.8699	15057.3	15057.3	4.87214	5	-116.565	13530.3	13530.3	4.40328	1136	1.84377e+06	1.84377e+06	6	36.8699	17811.3	17811.3	4.78605	6	-68.1986	17100.4	17100.4	5.05971	5	-90	19776.1	19776.1	4.43628	6	-104.036	12383	12383	4.60977
25.6	6	-53.1301	25643.7	25643.7	4.97572	6	11.3099	22076.5	22076.5	5.04425	6	36.8699	18191.9	18191.9	4.87214	5	-116.565	10936	10936	4.40328	1136	1.84795e+06	1.84795e+06	6	36.8699	21968.7	21968.7	4.78605	6	-68.1986	21077.7	21077.7	5.05971	5	-90	18098.8	18098.8	4.43628	6	-104.036	16992.8	16992.8	4.60977
25.8	6	-53.1301	23725.9	23725.9	4.97572	6	11.3099	22367.7	22367.7	5.04425	6	36.8699	15852.1	15852.1	4.87214	5	-116.565	11161.9	11161.9	4.40328	1136	1.91686e+06	1.91686e+06	6	36.8699	17390.4	17390.4	4.78605	6	-68.1986	19831.9	19831.9	5.05971	5	-90	17317.1	17317.1	4.43628	6	-104.036	12519	12519	4.60977
26	6	-53.1301	18800.4	18800.4	4.97572	6	11.3099	22787.3	22787.3	5.04425	6	36.8699	15864.8	15864.8	4.87214	5	-116.565	14565.5	14565.5	4.40328	1136	1842754	1842754	6	36.8699	17192.3	17192.3	4.78605	6	-68.1986	19914.8	19914.8	5.05971	5	-90	17623.5	17623.5	4.43628	6	-104.036	15347.6	15347.6	4.60977
26.2	6	-53.1301	17922.7	17922.7	4.97572	6	11.3099	23402.1	23402.1	5.04425	6	36.8699	14104.4	14104.4	4.87214	5	-116.565	14203.4	14203.4	4.40328	1136	1.89746e+06	1.89746e+06	6	36.8699	14275.8	14275.8	4.78605	6	-68.1986	17989.8	17989.8	5.05971	5	-90	16657.7	16657.7	4.43628	6	-104.036	15182	15182	4.60977
26.4	6	-53.1301	14620.2	14620.2	4.97572	6	11.3099	21888.3	21888.3	5.04425	6	36.8699	14950.7	14950.7	4.87214	5	-116.565	12396.3	12396.3	4.40328	1136	1.84383e+06	1.84383e+06	6	36.8699	16050.9	16050.9	4.78605	6	-68.1986	16187.1	16187.1	5.05971	5	-90	14500.7	14500.7	4.43628	6	-104.036	13220.7	13220.7	4.60977
26.6	6	-53.1301	17819.3	17819.3	4.97572	6	11.3099	20899.9	20899.9	5.04425	6	36.8699	20017.4	20017.4	4.87214	5	-116.565	13260.6	13260.6	4.40328	1136	1.88092e+06	1.88092e+06	6	36.8699	18201.2	18201.2	4.78605	6	-68.1986	18256.1	18256.1	5.05971	5	-90	12843.7	12843.7	4.43628	6	-104.036	14722.8	14722.8	4.60977
26.8	6	-53.1301	23680.9	23680.9	4.97572	6	11.3099	19404.8	19404.8	5.04425	6	36.8699	13274.6	13274.6	4.87214	5	-116.565	12739.2	12739.2	4.40328	1136	1.93795e+06	1.93795e+06	6	36.8699	20200.4	20200.4	4.78605	6	-68.1986	18830.4	18830.4	5.05971	5	-90	13294.5	13294.5	4.43628	6	-104.036	14538	14538	4.60977
27	6	-53.1301	20725	20725	4.97572	6	11.3099	22134.6	22134.6	5.04425	6	36.8699	16979.5	16979.5	4.87214	5	-116.565	13375.2	13375.2	4.40328	1136	1.91642e+06	1.91642e+06	6	36.8699	10976.8	10976.8	4.78605	6	-68.1986	16561	16561	5.05971	5	-90	15008.2	15008.2	4.43628	6	-104.036	15356	15356	4.60977
27.2	6	-53.1301	26046.8	26046.8	4.97572	6	11.3099	22100.2	22100.2	5.04425	6	36.8699	12828.3	12828.3	4.87214	5	-116.565	12088.8	12088.8	4.40328	1136	1.91723e+06	1.91723e+06	6	36.8699	12838.5	12838.5	4.78605	6	-68.1986	18708.4	18708.4	5.05971	5	-90	14556	14556	4.43628	6	-104.036	16555.4	16555.4	4.60977
27.4	6	-53.1301	26188.5	26188.5	4.97572	6	11.3099	19706.3	19706.3	5.04425	6	36.8699	18579.5	18579.5	4.87214	5	-116.565	11089.8	11089.8	4.40328	1136	1.85145e+06	1.85145e+06	6	36.8699	16927.9	16927.9	4.78605	6	-68.1986	24448.2	24448.2	5.05971	5	-90	16252.5	16252.5	4.43628	6	-104.036	14238.8	14238.8	4.60977
27.6	6	-53.1301	23845.8	23845.8	4.97572	6	11.3099	21638.4	21638.4	5.04425	6	36.8699	18324.9	18324.9	4.87214	5	-116.565	9554.38	9554.38	4.40328	1136	1.89132e+06	1.89132e+06	6	36.8699	16111.2	16111.2	4.78605	6	-68.1986	18318	18318	5.05971	5	-90	12208.6	12208.6	4.43628	6	-104.036	14188.8	14188.8	4.60977
27.8	6	-53.1301	19958.4	19958.4	4.97572	6	11.3099	12019.8	12019.8	5.04425	6	36.8699	15985.7	15985.7	4.87214	5	-116.565	13812.2	13812.2	4.40328	1136	1.88779e+06	1.88779e+06	6	36.8699	19608.5	19608.5	4.78605	6	-68.1986	15944.5	15944.5	5.05971	5	-90	13514.7	13514.7	4.43628	6	-104.036	12146.6	12146.6	4.60977
28	6	-53.1301	18672	18672	4.97572	6	11.3099	18829.7	18829.7	5.04425	6	36.8699	13833.8	13833.8	4.87214	5	-116.565	11721.6	11721.6	4.40328	1136	1893529	1893529	6	36.8699	15860.1	15860.1	4.78605	6	-68.1986	18434.4	18434.4	5.05971	5	-90	13918.2	13918.2	4.43628	6	-104.036	15386.1	15386.1	4.60977
28.2	6	-53.1301	19011.4	19011.4	4.97572	6	11.3099	17149	17149	5.04425	6	36.8699	13734.4	13734.4	4.87214	5	-116.565	12686.7	12686.7	4.40328	1136	1.85347e+06	1.85347e+06	6	36.8699	12253.5	12253.5	4.78605	6	-68.1986	20865.2	20865.2	5.05971	5	-90	15567.7	15567.7	4.43628	6	-104.036	12108.3	12108.3	4.60977
28.4	6	-53.1301	21428.7	21428.7	4.97572	6	11.3099	17815.4	17815.4	5.04425	6	36.8699	13808.5	13808.5	4.87214	5	-116.565	10795	10795	4.40328	1136	1.96337e+06	1.96337e+06	6	36.8699	16202.6	16202.6	4.78605	6	-68.1986	17083.4	17083.4	5.05971	5	-90	17528.2	17528.2	4.43628	6	-104.036	14572.7	14572.7	4.60977
28.6	6	-53.1301	25535.2	25535.2	4.97572	6	11.3099	16979	16979	5.04425	6	36.8699	17482.5	17482.5	4.87214	5	-116.565	14487.7	14487.7	4.40328	1136	1.974e+06	1.974e+06	6	36.8699	16089.9	16089.9	4.78605	6	-68.1986	20677	20677	5.05971	5	-90	17759.5	17759.5	4.43628	6	-104.036	12280.2	12280.2	4.60977
28.8	6	-53.1301	28776.7	28776.7	4.97572	6	11.3099	17827.7	17827.7	5.04425	6	36.8699	14956.5	14956.5	4.87214	5	-116.565	13816.4	13816.4	4.40328	1136	1.91949e+06	1.91949e+06	6	36.8699	16016.6	16016.6	4.78605	6	-68.1986	21918.4	21918.4	5.05971	5	-90	12800.7	12800.7	4.43628	6	-104.036	15443	15443	4.60977
29	6	-53.1301	27545.8	27545.8	4.97572	6	11.3099	19724.9	19724.9	5.04425	6	36.8699	19845.7	19845.7	4.87214	5	-116.565	11143.3	11143.3	4.40328	1136	1.89705e+06	1.89705e+06	6	36.8699	16993.5	16993.5	4.78605	6	-68.1986	19206.2	19206.2	5.05971	5	-90	11934.8	11934.8	4.43628	6	-104.036	15358.9	15358.9	4.60977
29.2	6	-53.1301	43693.7	43693.7	4.97572	6	11.3099	14671.3	14671.3	5.04425	6	36.8699	14859.9	14859.9	4.87214	5	-116.565	15384.9	15384.9	4.40328	1136	1.889e+06	1.889e+06	6	36.8699	15229	15229	4.78605	6	-68.1986	17372.9	17372.9	5.05971	5	-90	11289.7	11289.7	4.43628	6	-104.036	14822.8	14822.8	4.60977
29.4	6	-53.1301	37696.7	37696.7	4.97572	6	11.3099	16870.4	16870.4	5.04425	6	36.8699	17775	17775	4.87214	5	-116.565	11871.9	11871.9	4.40328	1136	1.91933e+06	1.91933e+06	6	36.8699	16395.6	16395.6	4.78605	6	-68.1986	21928.2	21928.2	5.05971	5	-90	11474.6	11474.6	4.43628	6	-104.036	17928	17928	4.60977
29.6	6	-53.1301	40966	40966	4.97572	6	11.3099	17958.8	17958.8	5.04425	6	36.8699	19180.5	19180.5	4.87214	5	-116.565	17614.7	17614.7	4.40328	1136	1.91833e+06	1.91833e+06	6	36.8699	21822.5	21822.5	4.78605	6	-68.1986	18191.4	18191.4	5.05971	5	-90	11306.5	11306.5	4.43628	6	-104.036	13996.4	13996.4	4.60977
29.8	6	-53.1301	42758.2	42758.2	4.97572	6	11.3099	14318.1	14318.1	5.04425	6	36.8699	14672.5	14672.5	4.87214	5	-116.565	14740.3	14740.3	4.40328	1136	1.89714e+06	1.89714e+06	6	36.8699	18246.5	18246.5	4.78605	6	-68.1986	17944.6	17944.6	5.05971	5	-90	13926.6	13926.6	4.43628	6	-104.036	16799.2	16799.2	4.60977
30	6	-53.1301	50007.7	50007.7	4.97572	6	11.3099	17732.2	17732.2	5.04425	6	36.8699	16568.9	16568.9	4.87214	5	-116.565	10471.3	10471.3	4.40328	1136	1.88563e+06	1.88563e+06	6	36.8699	17905.6	17905.6	4.78605	6	-68.1986	23227.1	23227.1	5.05971	5	-90	14792.7	14792.7	4.43628	6	-104.036	14764	14764	4.60977
		Background value of each axon
Time (s)	Axon1	Axon2	Axon3	Axon4	Axon6	Axon7	Axon8	Axon9
0	11098.8	11098.8	11098.8	9249.02	11098.8	11098.8	9249.02	11098.8
0.2	9432.76	9432.76	9432.76	7860.64	9432.76	9432.76	7860.64	9432.76
0.4	9404.22	9404.22	9404.22	7836.85	9404.22	9404.22	7836.85	9404.22
0.6	9822.44	9822.44	9822.44	8185.37	9822.44	9822.44	8185.37	9822.44
0.8	9093.41	9093.41	9093.41	7577.85	9093.41	9093.41	7577.85	9093.41
1	9029.25	9029.25	9029.25	7524.38	9029.25	9029.25	7524.38	9029.25
1.2	9558.95	9558.95	9558.95	7965.79	9558.95	9558.95	7965.79	9558.95
1.4	9332.72	9332.72	9332.72	7777.27	9332.72	9332.72	7777.27	9332.72
1.6	9337.14	9337.14	9337.14	7780.95	9337.14	9337.14	7780.95	9337.14
1.8	9330.78	9330.78	9330.78	7775.65	9330.78	9330.78	7775.65	9330.78
2	9408.27	9408.27	9408.27	7840.23	9408.27	9408.27	7840.23	9408.27
2.2	9678.9	9678.9	9678.9	8065.75	9678.9	9678.9	8065.75	9678.9
2.4	9536.42	9536.42	9536.42	7947.02	9536.42	9536.42	7947.02	9536.42
2.6	9214.79	9214.79	9214.79	7678.99	9214.79	9214.79	7678.99	9214.79
2.8	9477.95	9477.95	9477.95	7898.29	9477.95	9477.95	7898.29	9477.95
3	9256.51	9256.51	9256.51	7713.76	9256.51	9256.51	7713.76	9256.51
3.2	9156.31	9156.31	9156.31	7630.26	9156.31	9156.31	7630.26	9156.31
3.4	9348.4	9348.4	9348.4	7790.33	9348.4	9348.4	7790.33	9348.4
3.6	9348.04	9348.04	9348.04	7790.03	9348.04	9348.04	7790.03	9348.04
3.8	9625.84	9625.84	9625.84	8021.53	9625.84	9625.84	8021.53	9625.84
4	9261.14	9261.14	9261.14	7717.61	9261.14	9261.14	7717.61	9261.14
4.2	9141.83	9141.83	9141.83	7618.19	9141.83	9141.83	7618.19	9141.83
4.4	9166.83	9166.83	9166.83	7639.02	9166.83	9166.83	7639.02	9166.83
4.6	9580.07	9580.07	9580.07	7983.39	9580.07	9580.07	7983.39	9580.07
4.8	9101.27	9101.27	9101.27	7584.39	9101.27	9101.27	7584.39	9101.27
5	9266.39	9266.39	9266.39	7721.99	9266.39	9266.39	7721.99	9266.39
5.2	9554.25	9554.25	9554.25	7961.87	9554.25	9554.25	7961.87	9554.25
5.4	9356.67	9356.67	9356.67	7797.22	9356.67	9356.67	7797.22	9356.67
5.6	9631.47	9631.47	9631.47	8026.23	9631.47	9631.47	8026.23	9631.47
5.8	9559.72	9559.72	9559.72	7966.43	9559.72	9559.72	7966.43	9559.72
6	9228.56	9228.56	9228.56	7690.46	9228.56	9228.56	7690.46	9228.56
6.2	9599.01	9599.01	9599.01	7999.18	9599.01	9599.01	7999.18	9599.01
6.4	9431.46	9431.46	9431.46	7859.55	9431.46	9431.46	7859.55	9431.46
6.6	9397.96	9397.96	9397.96	7831.63	9397.96	9397.96	7831.63	9397.96
6.8	9608.49	9608.49	9608.49	8007.08	9608.49	9608.49	8007.08	9608.49
7	9569.51	9569.51	9569.51	7974.59	9569.51	9569.51	7974.59	9569.51
7.2	9513.21	9513.21	9513.21	7927.68	9513.21	9513.21	7927.68	9513.21
7.4	9418.66	9418.66	9418.66	7848.89	9418.66	9418.66	7848.89	9418.66
7.6	9344.78	9344.78	9344.78	7787.31	9344.78	9344.78	7787.31	9344.78
7.8	9270.06	9270.06	9270.06	7725.05	9270.06	9270.06	7725.05	9270.06
8	9585.85	9585.85	9585.85	7988.21	9585.85	9585.85	7988.21	9585.85
8.2	9551.55	9551.55	9551.55	7959.63	9551.55	9551.55	7959.63	9551.55
8.4	9682.6	9682.6	9682.6	8068.83	9682.6	9682.6	8068.83	9682.6
8.6	9713.01	9713.01	9713.01	8094.18	9713.01	9713.01	8094.18	9713.01
8.8	9405.11	9405.11	9405.11	7837.6	9405.11	9405.11	7837.6	9405.11
9	9263.15	9263.15	9263.15	7719.29	9263.15	9263.15	7719.29	9263.15
9.2	9562.42	9562.42	9562.42	7968.69	9562.42	9562.42	7968.69	9562.42
9.4	9877.91	9877.91	9877.91	8231.59	9877.91	9877.91	8231.59	9877.91
9.6	9622.22	9622.22	9622.22	8018.52	9622.22	9622.22	8018.52	9622.22
9.8	9109.69	9109.69	9109.69	7591.41	9109.69	9109.69	7591.41	9109.69
10	9096.51	9096.51	9096.51	7580.42	9096.51	9096.51	7580.42	9096.51
10.2	9607.9	9607.9	9607.9	8006.59	9607.9	9607.9	8006.59	9607.9
10.4	9329.16	9329.16	9329.16	7774.3	9329.16	9329.16	7774.3	9329.16
10.6	9304.99	9304.99	9304.99	7754.16	9304.99	9304.99	7754.16	9304.99
10.8	9417.73	9417.73	9417.73	7848.11	9417.73	9417.73	7848.11	9417.73
11	9669.94	9669.94	9669.94	8058.29	9669.94	9669.94	8058.29	9669.94
11.2	9645.91	9645.91	9645.91	8038.25	9645.91	9645.91	8038.25	9645.91
11.4	9479.87	9479.87	9479.87	7899.89	9479.87	9479.87	7899.89	9479.87
11.6	9466.91	9466.91	9466.91	7889.09	9466.91	9466.91	7889.09	9466.91
11.8	9713.58	9713.58	9713.58	8094.65	9713.58	9713.58	8094.65	9713.58
12	9519.32	9519.32	9519.32	7932.77	9519.32	9519.32	7932.77	9519.32
12.2	9544.22	9544.22	9544.22	7953.51	9544.22	9544.22	7953.51	9544.22
12.4	9979.16	9979.16	9979.16	8315.97	9979.16	9979.16	8315.97	9979.16
12.6	9416.48	9416.48	9416.48	7847.07	9416.48	9416.48	7847.07	9416.48
12.8	9453.26	9453.26	9453.26	7877.72	9453.26	9453.26	7877.72	9453.26
13	9508.75	9508.75	9508.75	7923.96	9508.75	9508.75	7923.96	9508.75
13.2	9745.63	9745.63	9745.63	8121.36	9745.63	9745.63	8121.36	9745.63
13.4	9499.79	9499.79	9499.79	7916.49	9499.79	9499.79	7916.49	9499.79
13.6	9648.66	9648.66	9648.66	8040.55	9648.66	9648.66	8040.55	9648.66
13.8	9671.72	9671.72	9671.72	8059.76	9671.72	9671.72	8059.76	9671.72
14	9628.21	9628.21	9628.21	8023.51	9628.21	9628.21	8023.51	9628.21
14.2	10041.3	10041.3	10041.3	8367.74	10041.3	10041.3	8367.74	10041.3
14.4	9829.58	9829.58	9829.58	8191.32	9829.58	9829.58	8191.32	9829.58
14.6	10058.9	10058.9	10058.9	8382.42	10058.9	10058.9	8382.42	10058.9
14.8	9853.57	9853.57	9853.57	8211.31	9853.57	9853.57	8211.31	9853.57
15	10146.2	10146.2	10146.2	8455.18	10146.2	10146.2	8455.18	10146.2
15.2	9795.65	9795.65	9795.65	8163.04	9795.65	9795.65	8163.04	9795.65
15.4	9761.96	9761.96	9761.96	8134.96	9761.96	9761.96	8134.96	9761.96
15.6	9826.29	9826.29	9826.29	8188.57	9826.29	9826.29	8188.57	9826.29
15.8	9697.18	9697.18	9697.18	8080.98	9697.18	9697.18	8080.98	9697.18
16	9842.46	9842.46	9842.46	8202.05	9842.46	9842.46	8202.05	9842.46
16.2	9574.19	9574.19	9574.19	7978.49	9574.19	9574.19	7978.49	9574.19
16.4	9825.7	9825.7	9825.7	8188.08	9825.7	9825.7	8188.08	9825.7
16.6	9997.66	9997.66	9997.66	8331.39	9997.66	9997.66	8331.39	9997.66
16.8	9764.56	9764.56	9764.56	8137.13	9764.56	9764.56	8137.13	9764.56
17	9808.46	9808.46	9808.46	8173.71	9808.46	9808.46	8173.71	9808.46
17.2	9730.12	9730.12	9730.12	8108.43	9730.12	9730.12	8108.43	9730.12
17.4	9421.2	9421.2	9421.2	7851	9421.2	9421.2	7851	9421.2
17.6	9854.09	9854.09	9854.09	8211.74	9854.09	9854.09	8211.74	9854.09
17.8	9965.62	9965.62	9965.62	8304.68	9965.62	9965.62	8304.68	9965.62
18	10091.5	10091.5	10091.5	8409.58	10091.5	10091.5	8409.58	10091.5
18.2	9885.94	9885.94	9885.94	8238.29	9885.94	9885.94	8238.29	9885.94
18.4	9762.53	9762.53	9762.53	8135.44	9762.53	9762.53	8135.44	9762.53
18.6	10181.5	10181.5	10181.5	8484.61	10181.5	10181.5	8484.61	10181.5
18.8	9967.7	9967.7	9967.7	8306.42	9967.7	9967.7	8306.42	9967.7
19	9787.13	9787.13	9787.13	8155.94	9787.13	9787.13	8155.94	9787.13
19.2	9659.19	9659.19	9659.19	8049.32	9659.19	9659.19	8049.32	9659.19
19.4	9840.59	9840.59	9840.59	8200.49	9840.59	9840.59	8200.49	9840.59
19.6	10327.4	10327.4	10327.4	8606.13	10327.4	10327.4	8606.13	10327.4
19.8	10362.9	10362.9	10362.9	8635.72	10362.9	10362.9	8635.72	10362.9
20	9710.6	9710.6	9710.6	8092.17	9710.6	9710.6	8092.17	9710.6
20.2	9610.34	9610.34	9610.34	8008.61	9610.34	9610.34	8008.61	9610.34
20.4	9599.47	9599.47	9599.47	7999.56	9599.47	9599.47	7999.56	9599.47
20.6	10078.5	10078.5	10078.5	8398.76	10078.5	10078.5	8398.76	10078.5
20.8	9931.64	9931.64	9931.64	8276.37	9931.64	9931.64	8276.37	9931.64
21	9476.22	9476.22	9476.22	7896.85	9476.22	9476.22	7896.85	9476.22
21.2	10134.6	10134.6	10134.6	8445.52	10134.6	10134.6	8445.52	10134.6
21.4	9778.6	9778.6	9778.6	8148.83	9778.6	9778.6	8148.83	9778.6
21.6	9666.87	9666.87	9666.87	8055.73	9666.87	9666.87	8055.73	9666.87
21.8	9710.8	9710.8	9710.8	8092.33	9710.8	9710.8	8092.33	9710.8
22	9979.58	9979.58	9979.58	8316.32	9979.58	9979.58	8316.32	9979.58
22.2	9786.89	9786.89	9786.89	8155.74	9786.89	9786.89	8155.74	9786.89
22.4	9991.58	9991.58	9991.58	8326.31	9991.58	9991.58	8326.31	9991.58
22.6	10090	10090	10090	8408.34	10090	10090	8408.34	10090
22.8	9993.69	9993.69	9993.69	8328.08	9993.69	9993.69	8328.08	9993.69
23	10319.8	10319.8	10319.8	8599.84	10319.8	10319.8	8599.84	10319.8
23.2	9654.02	9654.02	9654.02	8045.02	9654.02	9654.02	8045.02	9654.02
23.4	10169.5	10169.5	10169.5	8474.56	10169.5	10169.5	8474.56	10169.5
23.6	10436.1	10436.1	10436.1	8696.72	10436.1	10436.1	8696.72	10436.1
23.8	9756.6	9756.6	9756.6	8130.5	9756.6	9756.6	8130.5	9756.6
24	9847.27	9847.27	9847.27	8206.06	9847.27	9847.27	8206.06	9847.27
24.2	9998.74	9998.74	9998.74	8332.28	9998.74	9998.74	8332.28	9998.74
24.4	10025	10025	10025	8354.13	10025	10025	8354.13	10025
24.6	9816.22	9816.22	9816.22	8180.18	9816.22	9816.22	8180.18	9816.22
24.8	9734.62	9734.62	9734.62	8112.18	9734.62	9734.62	8112.18	9734.62
25	9640.2	9640.2	9640.2	8033.5	9640.2	9640.2	8033.5	9640.2
25.2	9921.32	9921.32	9921.32	8267.77	9921.32	9921.32	8267.77	9921.32
25.4	9738.22	9738.22	9738.22	8115.19	9738.22	9738.22	8115.19	9738.22
25.6	9760.3	9760.3	9760.3	8133.59	9760.3	9760.3	8133.59	9760.3
25.8	10124.3	10124.3	10124.3	8436.9	10124.3	10124.3	8436.9	10124.3
26	9732.86	9732.86	9732.86	8110.71	9732.86	9732.86	8110.71	9732.86
26.2	10021.8	10021.8	10021.8	8351.49	10021.8	10021.8	8351.49	10021.8
26.4	9738.52	9738.52	9738.52	8115.43	9738.52	9738.52	8115.43	9738.52
26.6	9934.42	9934.42	9934.42	8278.68	9934.42	9934.42	8278.68	9934.42
26.8	10235.6	10235.6	10235.6	8529.69	10235.6	10235.6	8529.69	10235.6
27	10121.9	10121.9	10121.9	8434.95	10121.9	10121.9	8434.95	10121.9
27.2	10126.2	10126.2	10126.2	8438.52	10126.2	10126.2	8438.52	10126.2
27.4	9778.79	9778.79	9778.79	8148.99	9778.79	9778.79	8148.99	9778.79
27.6	9989.39	9989.39	9989.39	8324.49	9989.39	9989.39	8324.49	9989.39
27.8	9970.71	9970.71	9970.71	8308.93	9970.71	9970.71	8308.93	9970.71
28	10001	10001	10001	8334.19	10001	10001	8334.19	10001
28.2	9789.46	9789.46	9789.46	8157.88	9789.46	9789.46	8157.88	9789.46
28.4	10369.9	10369.9	10369.9	8641.6	10369.9	10369.9	8641.6	10369.9
28.6	10426	10426	10426	8688.37	10426	10426	8688.37	10426
28.8	10138.2	10138.2	10138.2	8448.46	10138.2	10138.2	8448.46	10138.2
29	10019.6	10019.6	10019.6	8349.68	10019.6	10019.6	8349.68	10019.6
29.2	9977.13	9977.13	9977.13	8314.28	9977.13	9977.13	8314.28	9977.13
29.4	10137.3	10137.3	10137.3	8447.75	10137.3	10137.3	8447.75	10137.3
29.6	10132	10132	10132	8443.37	10132	10132	8443.37	10132
29.8	10020.1	10020.1	10020.1	8350.07	10020.1	10020.1	8350.07	10020.1
30	9959.29	9959.29	9959.29	8299.41	9959.29	9959.29	8299.41	9959.29
		Background Corrected Data
Time (s)	Axon1	Axon2	Axon3	Axon4	Axon6	Axon7	Axon8	Axon9
0	772.994	6551.02	3209.57	3558.67	3685.06	3973.44	6001.48	7662.07
0.2	3851.69	6405.39	5850.55	3640.33	8810.03	6578.28	3817.24	4222.52
0.4	6121.39	6566.91	9735.45	7279.38	6318.91	7272.95	7765.17	4644.83
0.6	5338.27	7671.93	7341.47	5614.63	6417.52	7673.44	6476.13	5083.83
0.8	12645.9	6142.6	10022.5	4137.91	5097.84	6022.29	6638.9	5424.82
1	6002.89	5881.07	10047	7284.21	6157	7055.99	7624.27	5315.28
1.2	6969	6000.08	9496.01	4310.5	4321.22	3524.26	5085.9	6737.1
1.4	7493.22	9427.97	10790.6	7460.07	6004.72	4720.7	7956.6	10078.1
1.6	12862.9	3185.79	15285.6	14103.2	5880.11	6756.05	10836.1	8772.84
1.8	7451.04	5796.61	15612.7	13643.5	5487.55	5872.37	10209.2	4080.08
2	5177.36	3290.35	18124.9	7450.74	5366.49	5759.35	4283.2	2054.16
2.2	3422.8	10206.9	14433	5627.49	5426.91	5355.77	3542.38	4773.45
2.4	4932.08	9621.67	9500.05	4901.06	5470.22	6495.89	4312.18	5929.27
2.6	4289.93	10372.9	11537.8	5066.66	7483.37	3532.59	4602.77	8037.27
2.8	3934.53	7808.67	15062.7	5325.76	5623.15	5920.29	3107.72	6345.36
3	9983.91	6626.68	11566.2	6847.46	7078.05	4403.27	813.517	7389.02
3.2	14756.8	14246.5	14437.2	4402.57	5054.08	6022.14	1950.49	8030.21
3.4	24166.4	11994.7	14877	5599.3	7092.7	9016.42	1857.47	5694.23
3.6	24162.3	10802.1	15391.8	6892.98	8742.13	6786.98	1680.68	5763.31
3.8	25944.2	9676.43	12596.8	8258.58	12724.2	9278.58	2345.27	6880.06
4	33828.8	11246.9	12249.8	7565.15	6078.2	7888.33	381.783	4533.62
4.2	23253.6	8378.98	10636.5	6763.03	5361.32	6513.14	4810.81	4420.72
4.4	25120.1	9590.26	11644.4	2857.67	6116.37	9590.87	2224.96	4886.21
4.6	15486.5	7858.75	8494.65	3075.16	10467.3	4353.22	4378.41	4693.92
4.8	12433.2	13864.2	8186.64	5320.33	8185.45	4976.26	4499.61	4054.85
5	19413.3	10931.8	11796.3	4340.02	4442.6	7685.94	10923.7	6226.24
5.2	15899.1	9311.22	9601.55	3417.86	5733.66	6570.01	4860.56	6560.61
5.4	14392.7	10414.9	11990	7172.31	7422.52	6271.54	4322.2	6683.52
5.6	16757.1	8571.42	9554.01	7252.18	10625.2	3681.54	4719.52	5221.34
5.8	14244	10792.8	7866.91	9377.39	10291	6093.94	6656.1	5014.61
6	12926.8	6556.22	13934.7	723.51	9478.6	5181.89	5849.12	5429.32
6.2	10122	10819.8	10678	4100.03	4285.18	4204.53	7354.3	4165.09
6.4	8918.83	10325.4	8595.59	3064	7698.76	3253.95	5603.93	5983.87
6.6	2902.33	7884.31	14393.2	4504.82	10968.5	5545.53	4994.55	4029.3
6.8	4297.73	8076.86	18939.5	4284.44	10718.5	4996.93	5192.41	6422.42
7	9407.19	6691.71	16063.8	7635.07	9227.43	5595.92	3642.52	4094.98
7.2	12606.4	5654.2	8529.22	2945.9	7463.35	6881.03	5996.39	8412.5
7.4	18587.5	11435.4	9041.8	7287.27	10802.6	6450.31	3974.72	8112.37
7.6	12635.1	8721.81	5672.07	3450.02	9415.65	6194.9	4547.38	7810.05
7.8	10082.2	3235.68	9248.84	2849.11	9288.57	3895.14	5070.65	4487.07
8	9582.5	6928.72	5133.46	3964.19	7698.7	6569.65	6581.8	6180.34
8.2	9348.88	6049.34	11819	3274.29	5660.52	6005.22	3611.07	3400.19
8.4	12079.8	8524.28	4564.26	4141.98	5542.15	8096.28	3078.23	3026.06
8.6	11753.3	3768.49	11304.6	6793.88	4306.9	8087.31	5070.13	5349.45
8.8	17680.3	3941.39	16697	4765.22	4166.85	4683.22	2222.47	5690.7
9	14503.3	4701.47	17112.3	5427.3	3117.98	8314.98	4661.88	5000.95
9.2	17011.1	6723.2	9808.96	3968.24	4608.53	5835.5	4143.19	6821.75
9.4	14241.9	5367.93	12687.9	703.06	4593.84	6509.23	4335.02	5476.85
9.6	14145.9	13751.2	7793.48	3719.36	3651.55	8102.59	4467.74	929.134
9.8	14059.6	13874.6	12961.2	6262.16	5506.65	7874.12	4115.38	6540.83
10	18940.1	7775.37	12730.2	2167.44	7530.29	9693.54	3395.49	5164.69
10.2	24801.1	10155.6	9384.45	6256.4	7657.48	5837.02	1339.2	8699.47
10.4	22208.7	7086.45	12199.4	2557.66	9426.55	4475.69	3006.71	1370.07
10.6	16881.5	12207.1	5296.67	3059.12	5577.15	4836.55	4471.63	2733.67
10.8	14857.1	9405.12	12030.2	6797.93	8346.6	8408.57	3006.45	7087.73
11	13668.9	8113.88	16964	1759.7	6037.28	6789.52	6242.51	5125.34
11.2	10627.4	7529.25	13480.9	3265.62	8676.4	3656.14	1539.9	7078.36
11.4	4732.06	10901.5	9801.57	2152.58	8192.5	5003.48	3020.39	4643.61
11.6	11057.5	10281.7	8786.88	3619.23	6539.2	6717.42	3333.05	8595.3
11.8	12755.6	13334.5	7597.28	3704.14	7766.18	4365.16	5635.72	2103.34
12	10370.8	8010.66	9958.67	7540.83	4348.8	3879.95	5024.86	4539.06
12.2	14049.1	12402.2	7810.71	4595.83	6951.42	7246.01	5727.57	2550.17
12.4	17677.2	10911.2	7556.6	3454.56	3391.21	5495.09	8552.57	4426.75
12.6	17015.3	12555.5	5306.71	2348.8	5567.96	8503.07	10533.4	5801.65
12.8	13943.5	5735.53	9914.75	6710.58	7388.26	5827.16	8309.86	3623.75
13	12681.5	8282.41	10450.9	7983.34	4821.42	8178.2	7557.13	6350.97
13.2	8289.81	9903.46	5710.96	5968.74	9397.18	9448.06	3948.03	7124.57
13.4	7839.4	4042.17	6022.71	4766.63	7264.78	9404.53	4084.92	4988.87
13.6	3080	6770.13	10955	4796.59	5955.91	9469.72	4868.05	8954.33
13.8	3885.84	6589.91	4649.97	3018.08	6291.66	10972.9	2543.14	2970.14
14	4676.22	8354.07	6781.05	2735.92	7684.56	4891.52	5582.53	4459.37
14.2	5039.48	4355.03	5190.32	3390.81	4623.45	8305.02	3100.87	4477.03
14.4	11842	7359	8752.99	4302.38	2119.85	9208.56	4794.83	3423.05
14.6	9164.46	7137.79	11352.7	2140.92	4459.8	9381.23	5139.34	4852.14
14.8	6626.15	6309.47	7498.4	3659.92	8035.06	8630.99	3935.62	4666.03
15	4300.67	5789.13	10460.8	6738.89	6037.87	8679.58	6196.33	3141.88
15.2	6128.52	3137.24	7291.98	5270.43	4719.46	8078.71	6523.49	3848.86
15.4	6483.51	5961.27	9462.65	6446.29	6222.36	6488.48	7524.27	1853.12
15.6	7700.11	7568.53	7249.85	6913.82	5850.18	8511.43	11564.1	4557.73
15.8	5558.35	7024.64	12781.4	683.744	4026.66	5491.69	9560.24	7276.42
16	5338.2	8597.83	11723.7	2424.15	7600.9	6430.05	11006.8	9759.22
16.2	10142.6	8541.69	7430.17	1635.06	7781.28	9805.35	15347.5	7094.51
16.4	11427.3	5171.24	11591.3	1999.92	5355.06	6408.12	16462	17922
16.6	13739.6	6390.72	9257.56	4315.4	3383.53	9460.93	15503.2	15885.5
16.8	19366.9	9269.28	11152.4	4670.67	5948.83	7882.98	16448.6	4834.45
17	11818.1	4755.94	7432.34	5304.52	3276.88	8985.83	13791.8	2919.23
17.2	11016	9188.81	11305.9	4839.73	4782.11	10843.3	10450.8	5671.13
17.4	9754.67	9158.29	12163.3	5282.5	6443.3	10029.5	9896.4	5753.47
17.6	15449.6	8773.75	12163.5	3170.25	6166.73	8285.33	7571.88	10152.7
17.8	9765.16	9161.88	11301.5	1908.28	8965.5	14385.5	13053.3	12026.2
18	7149.45	13406.4	8355.12	6221.72	11138.1	14173.3	6738.54	15101.4
18.2	4784.05	12498.7	12001.9	7938.88	7050.01	10916.1	10194.9	21245.8
18.4	6308.34	6709.28	13353.1	5497.73	6440.99	10984.7	11487.7	14529.5
18.6	6279.95	8173.48	11462.6	3375.2	6013.87	15711.4	13036	12899.5
18.8	5580.72	9135.91	10920.1	3601.46	7581.48	10030.1	9526	11975.7
19	6475.62	12937.8	10378.7	2921.7	6258.89	11317.2	12854.1	19901.1
19.2	6209.59	7094.53	11973.4	4392.14	5321.76	11480.1	11201.3	11682.7
19.4	5399.52	12283.2	11615.6	7807.6	5728.87	13084.7	9550.8	15760
19.6	8702.78	15673.3	12292.9	5369.81	11650.4	15655.6	11858.6	16948.1
19.8	6619.38	11626.9	12978.1	3534.46	7131.74	16279.5	15143.3	11138.5
20	5811.31	6961.96	7167.97	1801.15	9920.92	13985.1	14456.8	17516.2
20.2	10742	8681.97	11143.3	4629.13	11530.1	13865.8	10942.6	11667.3
20.4	6819.65	11827.8	8219.15	5746.94	8853.55	14098.7	14164.3	10454.2
20.6	4848.32	13149.7	558.46	6829.61	7034.4	16447.8	9004.42	10982.5
20.8	5316.32	17003.3	1481.13	5555.9	4306.05	17876.6	8681.53	6296.17
21	4013.14	14597.2	5501.34	6850.7	8812.73	13946.8	14241.1	9565.03
21.2	3266.27	13727.2	4256.19	5268.2	7427.64	17891.5	9356.47	7258.43
21.4	1074.66	16890	5397.52	6989.89	5898.64	19290.7	8952.11	4668.27
21.6	3413.23	13298.6	5150.57	6532.48	7698.16	13374	6133.33	5910.22
21.8	3081.61	9815.41	2754.23	5220.49	8654.25	15224.8	13966.6	6050.16
22	5983.02	12829.9	4905.2	8572.77	7298.05	12689.7	17968.5	5106.44
22.2	7890.38	6482.74	5852.01	3984.59	11757.4	17530.4	19394.5	6505.63
22.4	2470.11	10382	4800.49	2325.16	13208.4	17867	14704.1	7026.87
22.6	1149.54	10187.3	11911.2	4776.91	8438.18	17202.7	7731.4	3197.88
22.8	7722.8	15013.2	7088.47	4774.31	6376.58	13449.8	6196.19	5039.61
23	5335.35	11887	6686.26	3922.77	10127.8	14746.8	6037.39	3045.1
23.2	4345.79	15792.9	8301.94	1887.97	10262.1	15621.8	5304.42	4957.45
23.4	4815.12	10872.4	7110.33	2212.8	10762.8	10031.6	7153.15	7153.38
23.6	3290.46	16140	10551.1	7131.57	9344.23	15436.7	4193.45	5718.51
23.8	2500.08	12425.3	7744.85	7058.58	9764.13	11644.4	5857.68	5982.6
24	7211.7	12040.5	5408.88	4883.4	8728.52	13501.6	10742.6	8668.68
24.2	3205.18	12344.3	8159.83	5600.96	7208.74	12337.7	12337.2	5160.1
24.4	5346.64	15044.4	9649.33	3749.89	9249.89	12816.7	13547.8	12612.4
24.6	3854.25	10273	15187.1	6838.33	6202.53	15335	9638.73	4098.13
24.8	4300.44	14267.4	8677.35	3129.14	6009.87	17801.5	6115.12	2440.18
25	8529.8	10118.6	7793.74	5254.8	7652.71	12914	7739.58	5344.12
25.2	11703.6	18578.2	2855.28	5530.07	7984.93	11649.7	8242.52	8032.03
25.4	17116.6	12771.9	5319.07	5415.1	8073.1	7362.19	11660.9	2644.79
25.6	15883.4	12316.2	8431.61	2802.39	12208.4	11317.4	9965.2	7232.45
25.8	13601.7	12243.5	5727.82	2724.99	7266.12	9707.67	8880.22	2394.7
26	9067.53	13054.4	6131.94	6454.79	7459.46	10182	9512.81	5614.77
26.2	7900.94	13380.3	4082.58	5851.93	4254.05	7967.96	8306.24	5160.21
26.4	4881.69	12149.8	5212.22	4280.84	6312.43	6448.55	6385.24	3482.16
26.6	7884.87	10965.5	10083	4981.87	8266.73	8321.7	4564.99	4788.41
26.8	13445.2	9169.2	3038.96	4209.53	9964.73	8594.77	4764.81	4302.36
27	10603	12012.7	6857.57	4940.21	854.859	6439.02	6573.27	5234.06
27.2	15920.5	11973.9	2702.08	3650.3	2712.24	8582.19	6117.47	6429.19
27.4	16409.7	9927.54	8800.66	2940.81	7149.11	14669.4	8103.53	4459.98
27.6	13856.4	11649	8335.56	1229.89	6121.83	8328.6	3884.09	4199.4
27.8	9987.68	2049.06	6015	5503.28	9637.82	5973.77	5205.8	2175.89
28	8671.01	8828.65	3832.75	3387.38	5859.07	8433.33	5584.05	5385.11
28.2	9221.96	7359.53	3944.99	4528.84	2464.02	11075.8	7409.86	2318.88
28.4	11058.8	7445.51	3438.57	2153.36	5832.64	6713.44	8886.63	4202.83
28.6	15109.2	6552.91	7056.44	5799.3	5663.82	10250.9	9071.1	1854.2
28.8	18638.5	7689.57	4818.35	5367.92	5878.49	11780.3	4352.22	5304.83
29	17526.2	9705.25	9826.04	2793.66	6973.9	9186.58	3585.09	5339.27
29.2	33716.5	4694.18	4882.73	7070.64	5251.89	7395.79	2975.38	4845.65
29.4	27559.4	6733.06	7637.71	3424.2	6258.3	11790.9	3026.83	7790.73
29.6	30834	7826.72	9048.47	9171.34	11690.5	8059.36	2863.13	3864.4
29.8	32738.1	4298.04	4652.36	6390.24	8226.38	7924.49	5576.52	6779.12
30	40048.4	7772.93	6609.64	2171.9	7946.31	13267.8	6493.31	4804.71
		Normalized Data
Time (s)	Axon-1	Axon-2	Axon-3	Axon-4	Axon-6	Axon-7	Axon-8	Axon-9
0	0.328895	1.85564	1.15386	2.48297	1.28591	1.04689	3.66934	3.93054
0.2	1.63882	1.81439	2.1033	2.53995	3.07428	1.73319	2.33388	2.1661
0.4	2.60454	1.86014	3.49994	5.07901	2.205	1.91622	4.74767	2.38274
0.6	2.27134	2.17315	2.63929	3.91747	2.23941	2.02173	3.95955	2.60794
0.8	5.38061	1.73995	3.60314	2.88713	1.7789	1.5867	4.05906	2.78286
1	2.55412	1.66587	3.61196	5.08238	2.1485	1.85905	4.66152	2.72667
1.2	2.96518	1.69958	3.41386	3.00755	1.5079	0.928543	3.10955	3.45604
1.4	3.18823	2.67057	3.87927	5.20509	2.09536	1.24377	4.86471	5.16992
1.6	5.47292	0.902407	5.49524	9.84015	2.05188	1.78003	6.62523	4.50035
1.8	3.17028	1.64195	5.61285	9.51939	1.9149	1.5472	6.24196	2.09303
2	2.20287	0.932026	6.51599	5.19857	1.87265	1.51742	2.61878	1.05376
2.2	1.45634	2.89119	5.18874	3.92645	1.89374	1.41109	2.16583	2.44872
2.4	2.09851	2.72543	3.41531	3.4196	1.90885	1.71148	2.6365	3.04164
2.6	1.82529	2.93822	4.14791	3.53514	2.61134	0.930736	2.81416	4.12302
2.8	1.67407	2.21188	5.41513	3.71592	1.96221	1.55983	1.90008	3.25509
3	4.24797	1.87707	4.1581	4.77765	2.4699	1.16014	0.497389	3.79047
3.2	6.27875	4.03548	5.19026	3.07179	1.76364	1.58666	1.19254	4.11939
3.4	10.2824	3.39761	5.34834	3.90677	2.47502	2.37557	1.13567	2.92107
3.6	10.2806	3.05979	5.53342	4.80941	3.05059	1.78818	1.02758	2.9565
3.8	11.0388	2.74094	4.52863	5.76222	4.44013	2.44464	1.43391	3.52938
4	14.3935	3.18581	4.40385	5.2784	2.121	2.07835	0.233425	2.32569
4.2	9.89398	2.37343	3.82388	4.71874	1.87085	1.71603	2.94136	2.26777
4.4	10.6882	2.71654	4.1862	1.99387	2.13432	2.52692	1.36036	2.50656
4.6	6.58921	2.22607	3.05387	2.14562	3.65259	1.14695	2.67698	2.40792
4.8	5.2901	3.92718	2.94314	3.71213	2.85633	1.3111	2.75109	2.08009
5	8.26003	3.09655	4.24081	3.02814	1.55026	2.02503	6.67881	3.19398
5.2	6.76477	2.6375	3.4518	2.38473	2.00078	1.73101	2.97177	3.36551
5.4	6.12385	2.95014	4.31046	5.00431	2.59011	1.65237	2.64262	3.42856
5.6	7.12984	2.42794	3.43471	5.06003	3.7077	0.969982	2.88554	2.67848
5.8	6.06058	3.05716	2.82819	6.54285	3.59107	1.60558	4.06958	2.57243
6	5.50011	1.85711	5.00961	0.504811	3.30758	1.36528	3.57619	2.78517
6.2	4.30674	3.06481	3.8388	2.86069	1.49532	1.10777	4.49646	2.13664
6.4	3.7948	2.92477	3.09016	2.13783	2.6865	0.857323	3.42628	3.06965
6.6	1.23489	2.23331	5.17444	3.14313	3.82749	1.46109	3.0537	2.06698
6.8	1.8286	2.28785	6.80884	2.98937	3.74026	1.31655	3.17467	3.29462
7	4.00259	1.89549	5.77501	5.32718	3.21994	1.47437	2.22706	2.10067
7.2	5.36381	1.60161	3.0663	2.05543	2.60436	1.81296	3.66623	4.3155
7.4	7.90866	3.23919	3.25057	5.08451	3.7696	1.69947	2.43016	4.16154
7.6	5.37599	2.47054	2.03914	2.40717	3.28561	1.63218	2.7803	4.00645
7.8	4.28981	0.916539	3.325	1.98789	3.24127	1.02626	3.10023	2.30181
8	4.07718	1.96263	1.84551	2.76592	2.68648	1.73092	4.02415	3.17043
8.2	3.97778	1.71354	4.24898	2.28456	1.97525	1.5822	2.20783	1.74425
8.4	5.13972	2.41459	1.64088	2.88996	1.93395	2.13314	1.88205	1.55233
8.6	5.00083	1.06746	4.06405	4.74027	1.5029	2.13078	3.09991	2.7442
8.8	7.52265	1.11644	6.00264	3.32482	1.45403	1.23389	1.35883	2.91925
9	6.17089	1.33174	6.15196	3.78677	1.08803	2.19076	2.8503	2.56542
9.2	7.23792	1.90441	3.52637	2.76875	1.60816	1.53749	2.53317	3.49947
9.4	6.05966	1.52052	4.56137	0.490543	1.60303	1.715	2.65046	2.80955
9.6	6.01881	3.89517	2.80179	2.59509	1.27422	2.1348	2.73161	0.476634
9.8	5.98212	3.93011	4.65961	4.36927	1.92156	2.07461	2.51617	3.35536
10	8.05867	2.20245	4.57657	1.51228	2.62772	2.55397	2.07602	2.64942
10.2	10.5524	2.87668	3.37376	4.36525	2.6721	1.53789	0.818797	4.46271
10.4	9.44939	2.00731	4.38574	1.78455	3.28942	1.17922	1.83832	0.702827
10.6	7.18277	3.45778	1.90418	2.13443	1.94616	1.27429	2.73398	1.40234
10.8	6.32144	2.6641	4.3249	4.74309	2.91257	2.21542	1.83816	3.63591
11	5.81587	2.29834	6.09865	1.22779	2.10672	1.78884	3.81671	2.62923
11.2	4.52174	2.13274	4.84645	2.2785	3.02765	0.963289	0.941505	3.63111
11.4	2.0134	3.08796	3.52371	1.50191	2.85879	1.31828	1.84668	2.38211
11.6	4.70475	2.91241	3.15893	2.52523	2.28187	1.76985	2.03785	4.40927
11.8	5.4273	3.77713	2.73126	2.58448	2.71003	1.15009	3.44571	1.07899
12	4.41258	2.2691	3.58019	5.26143	1.51753	1.02226	3.07223	2.32848
12.2	5.97763	3.51305	2.80799	3.20663	2.42572	1.90912	3.50187	1.30821
12.4	7.52134	3.09069	2.71664	2.41034	1.18337	1.4478	5.22909	2.27087
12.6	7.23971	3.55648	1.90779	1.63882	1.94296	2.24032	6.44021	2.97617
12.8	5.9327	1.62465	3.5644	4.68215	2.57815	1.53529	5.0807	1.85893
13	5.39573	2.34608	3.75716	5.57018	1.68245	2.15472	4.62048	3.25796
13.2	3.52716	2.80525	2.05312	4.16454	3.27917	2.4893	2.41385	3.65481
13.4	3.33552	1.14499	2.16519	3.3258	2.53506	2.47783	2.49755	2.55923
13.6	1.31048	1.91771	3.93836	3.34671	2.07833	2.495	2.97636	4.59345
13.8	1.65335	1.86666	1.67169	2.1058	2.19549	2.89104	1.55489	1.52365
14	1.98965	2.36638	2.43782	1.90892	2.68155	1.28878	3.41319	2.2876
14.2	2.14421	1.23361	1.86595	2.36585	1.61336	2.18814	1.89589	2.29666
14.4	5.03854	2.08451	3.14674	3.00188	0.739726	2.42619	2.93159	1.75598
14.6	3.89931	2.02185	4.08137	1.49378	1.55626	2.47169	3.14222	2.48908
14.8	2.81931	1.78722	2.69571	2.55362	2.80386	2.27402	2.40626	2.39361
15	1.82986	1.63983	3.76072	4.7019	2.10693	2.28682	3.78847	1.61174
15.2	2.60757	0.888654	2.6215	3.67731	1.64687	2.12851	3.9885	1.97442
15.4	2.75862	1.68859	3.40187	4.49774	2.17131	1.70953	4.60038	0.950624
15.6	3.27626	2.14386	2.60636	4.82395	2.04144	2.24252	7.07037	2.33806
15.8	2.36498	1.9898	4.59496	0.477065	1.40511	1.4469	5.84519	3.73271
16	2.27131	2.43542	4.21473	1.69139	2.65236	1.69414	6.72961	5.00635
16.2	4.3155	2.41952	2.67118	1.14082	2.7153	2.58343	9.38355	3.63939
16.4	4.86209	1.46481	4.16711	1.3954	1.86866	1.68836	10.0649	9.19375
16.6	5.84596	1.81024	3.32814	3.01096	1.18069	2.49269	9.47877	8.14905
16.8	8.24027	2.62562	4.00935	3.25885	2.07586	2.07694	10.0568	2.48001
17	5.0284	1.34717	2.67196	3.7011	1.14348	2.36751	8.43238	1.49752
17.2	4.68711	2.60282	4.06453	3.3768	1.66873	2.8569	6.3897	2.90921
17.4	4.15043	2.59418	4.37277	3.68573	2.24841	2.64248	6.05072	2.95145
17.6	6.57353	2.48525	4.37285	2.21196	2.1519	2.18295	4.62949	5.20821
17.8	4.1549	2.59519	4.06294	1.33145	3.12854	3.79017	7.98089	6.1693
18	3.04196	3.79749	3.00371	4.34106	3.88667	3.73426	4.11998	7.74681
18.2	2.03553	3.54039	4.31475	5.53916	2.46012	2.87607	6.23324	10.8988
18.4	2.68408	1.90047	4.80051	3.83591	2.2476	2.89414	7.02365	7.45342
18.6	2.672	2.31522	4.12086	2.35496	2.09856	4.1395	7.97027	6.61725
18.8	2.37449	2.58784	3.92582	2.51283	2.64558	2.64265	5.82426	6.14339
19	2.75526	3.66476	3.73119	2.03854	2.18406	2.98175	7.85905	10.209
19.2	2.64207	2.0096	4.30449	3.06451	1.85704	3.02469	6.84851	5.99306
19.4	2.2974	3.47934	4.17585	5.44756	1.99911	3.44745	5.83942	8.08465
19.6	3.70287	4.43962	4.41934	3.74666	4.06545	4.1248	7.25039	8.69417
19.8	2.81643	3.29344	4.66568	2.46609	2.48864	4.28919	9.25871	5.7139
20	2.47261	1.97204	2.57692	1.25671	3.46193	3.68469	8.839	8.98556
20.2	4.57052	2.45926	4.00609	3.22986	4.02346	3.65324	6.69034	5.98517
20.4	2.90164	3.35036	2.95482	4.00978	3.08947	3.7146	8.66016	5.36288
20.6	2.06287	3.72479	0.200769	4.76519	2.45467	4.33353	5.50535	5.63387
20.8	2.262	4.81637	0.532474	3.87649	1.50261	4.70999	5.30794	3.22985
21	1.70752	4.1348	1.97776	4.77991	3.07523	3.67459	8.7071	4.90673
21.2	1.38974	3.88836	1.53012	3.67576	2.59189	4.7139	5.7206	3.72348
21.4	0.457249	4.78426	1.94044	4.87702	2.05835	5.08256	5.47337	2.39476
21.6	1.45227	3.76696	1.85165	4.55788	2.6863	3.52366	3.74995	3.03187
21.8	1.31117	2.78031	0.99016	3.64247	3.01992	4.0113	8.53929	3.10365
22	2.54567	3.63421	1.76344	5.98144	2.54668	3.34338	10.9861	2.61954
22.2	3.35721	1.8363	2.10383	2.78015	4.10276	4.61876	11.8579	3.3373
22.4	1.05099	2.94081	1.7258	1.62232	4.6091	4.70745	8.99019	3.60469
22.6	0.489109	2.88564	4.28215	3.33298	2.94453	4.53241	4.72702	1.64047
22.8	3.28591	4.25264	2.54834	3.33116	2.22512	3.54365	3.78839	2.58525
23	2.2701	3.36711	2.40374	2.73702	3.53412	3.88537	3.6913	1.5621
23.2	1.84905	4.47351	2.98459	1.31729	3.581	4.1159	3.24315	2.54311
23.4	2.04875	3.07971	2.5562	1.54393	3.75572	2.64304	4.37348	3.66959
23.6	1.40003	4.57181	3.79319	4.97588	3.26069	4.06712	2.5639	2.93352
23.8	1.06374	3.51959	2.78431	4.92495	3.40722	3.06797	3.58142	3.069
24	3.06845	3.41061	1.94452	3.40727	3.04584	3.5573	6.56808	4.44692
24.2	1.36375	3.49665	2.9335	3.90793	2.51551	3.25063	7.54304	2.64707
24.4	2.2749	4.26149	3.46898	2.61639	3.22777	3.37683	8.28323	6.46999
24.6	1.63991	2.90992	5.45983	4.77128	2.16439	4.04035	5.89318	2.10228
24.8	1.82976	4.04139	3.11955	2.18328	2.09716	4.69019	3.73882	1.25178
25	3.62927	2.86621	2.80189	3.66641	2.67043	3.40248	4.73202	2.74146
25.2	4.97966	5.26245	1.02649	3.85847	2.78636	3.06937	5.03952	4.12032
25.4	7.28281	3.61778	1.91223	3.77826	2.81713	1.93973	7.12952	1.35674
25.6	6.7581	3.48868	3.03121	1.9553	4.26016	2.98181	6.09278	3.71015
25.8	5.78726	3.46808	2.05918	1.90129	2.53553	2.55769	5.42942	1.22845
26	3.85807	3.6978	2.20446	4.50367	2.603	2.68266	5.81619	2.8803
26.2	3.36171	3.7901	1.46771	4.08304	1.48446	2.09933	5.07848	2.64712
26.4	2.07707	3.44155	1.87382	2.98686	2.20274	1.69901	3.90397	1.7863
26.6	3.35487	3.10608	3.62489	3.47598	2.8847	2.19253	2.79106	2.45639
26.8	5.7207	2.59727	1.09252	2.93709	3.47722	2.26448	2.91323	2.20705
27	4.51139	3.40272	2.46533	3.44691	0.298305	1.6965	4.01894	2.685
27.2	6.7739	3.39174	0.971412	2.54691	0.946444	2.26116	3.74026	3.29809
27.4	6.98202	2.81208	3.16388	2.05188	2.4947	3.86497	4.95455	2.28791
27.6	5.89564	3.2997	2.99667	0.858128	2.13623	2.19435	2.37475	2.15424
27.8	4.24958	0.580417	2.16242	3.83978	3.36314	1.57392	3.18286	1.11621
28	3.68936	2.5008	1.37789	2.36346	2.04454	2.22194	3.41412	2.76249
28.2	3.92378	2.08466	1.41824	3.15989	0.859828	2.91815	4.53043	1.18956
28.4	4.70531	2.10902	1.23618	1.50246	2.03531	1.7688	5.43334	2.15599
28.6	6.42868	1.85618	2.53682	4.04632	1.9764	2.70083	5.54612	0.951182
28.8	7.93036	2.17815	1.73222	3.74534	2.05131	3.10377	2.66097	2.72131
29	7.45706	2.74911	3.53251	1.94921	2.43356	2.4204	2.19195	2.73898
29.2	14.3458	1.32967	1.75537	4.93337	1.83266	1.94858	1.81917	2.48575
29.4	11.726	1.90721	2.74579	2.38915	2.18385	3.10656	1.85062	3.99654
29.6	13.1193	2.217	3.25297	6.39908	4.07943	2.12341	1.75053	1.98239
29.8	13.9295	1.21746	1.67255	4.45863	2.87062	2.08788	3.40952	3.4776
30	17.0399	2.20176	2.3762	1.51539	2.77289	3.49569	3.97005	2.46475
		Cumulative Data
Summary	Axon1	Axon2	Axon3	Axon4	Axon6	Axon7	Axon8	Axon9
	708.824	399.116	498.634	510.548	369.518	359.455	654.776	499.306

## Sheet: WT-Culture2-Seq02
		Raw Data
Time (S)	Area1	Angle1	IntDen1	RawIntDen1	Length1	Area2	Angle2	IntDen2	RawIntDen2	Length2	Area3	Angle3	IntDen3	RawIntDen3	Length3	Area4	Angle4	IntDen4	RawIntDen4	Length4	Area5	IntDen5	RawIntDen5	Area6	Angle6	IntDen6	RawIntDen6	Length6	Area7	Angle7	IntDen7	RawIntDen7	Length7	Area8	Angle8	IntDen8	RawIntDen8	Length8	Area9	Angle9	IntDen9	RawIntDen9	Length9
0	7	-36.8699	14924.9	14924.9	5.625	6	-21.8014	14370.5	14370.5	5.43283	7	-63.4349	19676.2	19676.2	5.56732	6	-53.1301	15358.2	15358.2	4.94694	1837	3072420	3072420	7	-59.0362	17169	17169	5.74698	6	-21.8014	13225.7	13225.7	5.38516	7	0	14300.7	14300.7	5.625	6	116.565	16127.8	16127.8	4.50694
0.2	7	-36.8699	14935.5	14935.5	5.625	6	-21.8014	14567.9	14567.9	5.43283	7	-63.4349	14341.5	14341.5	5.56732	6	-53.1301	23634.6	23634.6	4.94694	1837	2.63906e+06	2.63906e+06	7	-59.0362	16541.6	16541.6	5.74698	6	-21.8014	11930	11930	5.38516	7	0	20805.8	20805.8	5.625	6	116.565	14970	14970	4.50694
0.4	7	-36.8699	12235.5	12235.5	5.625	6	-21.8014	13118	13118	5.43283	7	-63.4349	17460.8	17460.8	5.56732	6	-53.1301	15652.8	15652.8	4.94694	1837	2676087	2676087	7	-59.0362	15884.5	15884.5	5.74698	6	-21.8014	13408.6	13408.6	5.38516	7	0	24714.3	24714.3	5.625	6	116.565	15221.4	15221.4	4.50694
0.6	7	-36.8699	16881.5	16881.5	5.625	6	-21.8014	16833.5	16833.5	5.43283	7	-63.4349	14374.4	14374.4	5.56732	6	-53.1301	13854.7	13854.7	4.94694	1837	2652317	2652317	7	-59.0362	15158.2	15158.2	5.74698	6	-21.8014	14807	14807	5.38516	7	0	20966	20966	5.625	6	116.565	11739.9	11739.9	4.50694
0.8	7	-36.8699	14231.2	14231.2	5.625	6	-21.8014	18360.5	18360.5	5.43283	7	-63.4349	15917.7	15917.7	5.56732	6	-53.1301	16685.7	16685.7	4.94694	1837	2.66586e+06	2.66586e+06	7	-59.0362	14953	14953	5.74698	6	-21.8014	13435.5	13435.5	5.38516	7	0	20030.5	20030.5	5.625	6	116.565	13207.1	13207.1	4.50694
1	7	-36.8699	18424.8	18424.8	5.625	6	-21.8014	13570	13570	5.43283	7	-63.4349	15700.7	15700.7	5.56732	6	-53.1301	18222.3	18222.3	4.94694	1837	2.64818e+06	2.64818e+06	7	-59.0362	17175.8	17175.8	5.74698	6	-21.8014	16105.5	16105.5	5.38516	7	0	22425.9	22425.9	5.625	6	116.565	15809.7	15809.7	4.50694
1.2	7	-36.8699	17393.4	17393.4	5.625	6	-21.8014	17711.4	17711.4	5.43283	7	-63.4349	14956.5	14956.5	5.56732	6	-53.1301	19226.2	19226.2	4.94694	1837	2.65312e+06	2.65312e+06	7	-59.0362	16358.1	16358.1	5.74698	6	-21.8014	16129	16129	5.38516	7	0	18977.7	18977.7	5.625	6	116.565	15449.1	15449.1	4.50694
1.4	7	-36.8699	16541.5	16541.5	5.625	6	-21.8014	16247.7	16247.7	5.43283	7	-63.4349	18019.6	18019.6	5.56732	6	-53.1301	16847.7	16847.7	4.94694	1837	2.74353e+06	2.74353e+06	7	-59.0362	16663.9	16663.9	5.74698	6	-21.8014	18089.4	18089.4	5.38516	7	0	23399.9	23399.9	5.625	6	116.565	14699.5	14699.5	4.50694
1.6	7	-36.8699	16586	16586	5.625	6	-21.8014	15959.4	15959.4	5.43283	7	-63.4349	21136.4	21136.4	5.56732	6	-53.1301	19822	19822	4.94694	1837	2.72726e+06	2.72726e+06	7	-59.0362	16402.6	16402.6	5.74698	6	-21.8014	12759.4	12759.4	5.38516	7	0	22065	22065	5.625	6	116.565	13775.4	13775.4	4.50694
1.8	7	-36.8699	14637.4	14637.4	5.625	6	-21.8014	13626.2	13626.2	5.43283	7	-63.4349	17758.8	17758.8	5.56732	6	-53.1301	13876.7	13876.7	4.94694	1837	2578230	2578230	7	-59.0362	13744.2	13744.2	5.74698	6	-21.8014	14821.1	14821.1	5.38516	7	0	22396.1	22396.1	5.625	6	116.565	16081.4	16081.4	4.50694
2	7	-36.8699	14788.6	14788.6	5.625	6	-21.8014	15120.5	15120.5	5.43283	7	-63.4349	18810.8	18810.8	5.56732	6	-53.1301	14332.2	14332.2	4.94694	1837	2.66578e+06	2.66578e+06	7	-59.0362	17559.8	17559.8	5.74698	6	-21.8014	18189	18189	5.38516	7	0	23501.8	23501.8	5.625	6	116.565	17268.2	17268.2	4.50694
2.2	7	-36.8699	17167.7	17167.7	5.625	6	-21.8014	14665.7	14665.7	5.43283	7	-63.4349	14330.3	14330.3	5.56732	6	-53.1301	13690	13690	4.94694	1837	2.67295e+06	2.67295e+06	7	-59.0362	15487.5	15487.5	5.74698	6	-21.8014	17847.7	17847.7	5.38516	7	0	15811.4	15811.4	5.625	6	116.565	11582	11582	4.50694
2.4	7	-36.8699	15435.2	15435.2	5.625	6	-21.8014	12972.1	12972.1	5.43283	7	-63.4349	16220.4	16220.4	5.56732	6	-53.1301	14261.4	14261.4	4.94694	1837	2.68168e+06	2.68168e+06	7	-59.0362	16219.1	16219.1	5.74698	6	-21.8014	18731.7	18731.7	5.38516	7	0	22537.9	22537.9	5.625	6	116.565	11596	11596	4.50694
2.6	7	-36.8699	15657	15657	5.625	6	-21.8014	13215.3	13215.3	5.43283	7	-63.4349	18166.8	18166.8	5.56732	6	-53.1301	13278.9	13278.9	4.94694	1837	2.69881e+06	2.69881e+06	7	-59.0362	13276.3	13276.3	5.74698	6	-21.8014	14206	14206	5.38516	7	0	20003.6	20003.6	5.625	6	116.565	17507.6	17507.6	4.50694
2.8	7	-36.8699	16058.4	16058.4	5.625	6	-21.8014	13011.1	13011.1	5.43283	7	-63.4349	19596.8	19596.8	5.56732	6	-53.1301	9827.14	9827.14	4.94694	1837	2.61608e+06	2.61608e+06	7	-59.0362	10736.1	10736.1	5.74698	6	-21.8014	17750.7	17750.7	5.38516	7	0	21424.9	21424.9	5.625	6	116.565	15514.1	15514.1	4.50694
3	7	-36.8699	14073.4	14073.4	5.625	6	-21.8014	17890.9	17890.9	5.43283	7	-63.4349	20566.3	20566.3	5.56732	6	-53.1301	13133.9	13133.9	4.94694	1837	2.67313e+06	2.67313e+06	7	-59.0362	10935.4	10935.4	5.74698	6	-21.8014	15321.7	15321.7	5.38516	7	0	24369.1	24369.1	5.625	6	116.565	18263.9	18263.9	4.50694
3.2	7	-36.8699	12414.1	12414.1	5.625	6	-21.8014	13691.3	13691.3	5.43283	7	-63.4349	16626	16626	5.56732	6	-53.1301	13115.3	13115.3	4.94694	1837	2.64743e+06	2.64743e+06	7	-59.0362	12990.1	12990.1	5.74698	6	-21.8014	13258.8	13258.8	5.38516	7	0	22752.4	22752.4	5.625	6	116.565	16455.2	16455.2	4.50694
3.4	7	-36.8699	14175	14175	5.625	6	-21.8014	14096.4	14096.4	5.43283	7	-63.4349	19794.6	19794.6	5.56732	6	-53.1301	12997.1	12997.1	4.94694	1837	2.66312e+06	2.66312e+06	7	-59.0362	13759.3	13759.3	5.74698	6	-21.8014	15799.8	15799.8	5.38516	7	0	19056.1	19056.1	5.625	6	116.565	15824.6	15824.6	4.50694
3.6	7	-36.8699	16594.6	16594.6	5.625	6	-21.8014	15191	15191	5.43283	7	-63.4349	16150.4	16150.4	5.56732	6	-53.1301	11363.6	11363.6	4.94694	1837	2.73784e+06	2.73784e+06	7	-59.0362	14430.9	14430.9	5.74698	6	-21.8014	12309.8	12309.8	5.38516	7	0	25280.9	25280.9	5.625	6	116.565	18636	18636	4.50694
3.8	7	-36.8699	16978.3	16978.3	5.625	6	-21.8014	13259.4	13259.4	5.43283	7	-63.4349	18783.2	18783.2	5.56732	6	-53.1301	13965.8	13965.8	4.94694	1837	2654727	2654727	7	-59.0362	12178.7	12178.7	5.74698	6	-21.8014	16216.7	16216.7	5.38516	7	0	21795.2	21795.2	5.625	6	116.565	14348.7	14348.7	4.50694
4	7	-36.8699	15205.2	15205.2	5.625	6	-21.8014	9309.57	9309.57	5.43283	7	-63.4349	19796.1	19796.1	5.56732	6	-53.1301	13255	13255	4.94694	1837	2.64959e+06	2.64959e+06	7	-59.0362	13520.8	13520.8	5.74698	6	-21.8014	14142.2	14142.2	5.38516	7	0	28424	28424	5.625	6	116.565	15442	15442	4.50694
4.2	7	-36.8699	17430	17430	5.625	6	-21.8014	13037.6	13037.6	5.43283	7	-63.4349	18268.8	18268.8	5.56732	6	-53.1301	12088.4	12088.4	4.94694	1837	2.67792e+06	2.67792e+06	7	-59.0362	13862.6	13862.6	5.74698	6	-21.8014	15391	15391	5.38516	7	0	24468.5	24468.5	5.625	6	116.565	16127.8	16127.8	4.50694
4.4	7	-36.8699	16185.9	16185.9	5.625	6	-21.8014	13391.9	13391.9	5.43283	7	-63.4349	15788.7	15788.7	5.56732	6	-53.1301	13877.8	13877.8	4.94694	1837	2.70149e+06	2.70149e+06	7	-59.0362	13723.7	13723.7	5.74698	6	-21.8014	22435.3	22435.3	5.38516	7	0	28711.6	28711.6	5.625	6	116.565	17854.9	17854.9	4.50694
4.6	7	-36.8699	18541.5	18541.5	5.625	6	-21.8014	15684.1	15684.1	5.43283	7	-63.4349	19816.1	19816.1	5.56732	6	-53.1301	14928.7	14928.7	4.94694	1837	2.72783e+06	2.72783e+06	7	-59.0362	16042	16042	5.74698	6	-21.8014	19372.5	19372.5	5.38516	7	0	20930.5	20930.5	5.625	6	116.565	13695.5	13695.5	4.50694
4.8	7	-36.8699	17237.9	17237.9	5.625	6	-21.8014	11824.8	11824.8	5.43283	7	-63.4349	18802.5	18802.5	5.56732	6	-53.1301	12884.2	12884.2	4.94694	1837	2624792	2624792	7	-59.0362	16444.6	16444.6	5.74698	6	-21.8014	21804.1	21804.1	5.38516	7	0	18946.5	18946.5	5.625	6	116.565	12118.2	12118.2	4.50694
5	7	-36.8699	20467	20467	5.625	6	-21.8014	11066.9	11066.9	5.43283	7	-63.4349	19145.3	19145.3	5.56732	6	-53.1301	13114	13114	4.94694	1837	2712192	2712192	7	-59.0362	13965.3	13965.3	5.74698	6	-21.8014	21355.8	21355.8	5.38516	7	0	16832.4	16832.4	5.625	6	116.565	13607.4	13607.4	4.50694
5.2	7	-36.8699	22570.6	22570.6	5.625	6	-21.8014	12569.1	12569.1	5.43283	7	-63.4349	17489.1	17489.1	5.56732	6	-53.1301	14211.8	14211.8	4.94694	1837	2.63129e+06	2.63129e+06	7	-59.0362	14705.5	14705.5	5.74698	6	-21.8014	14457.8	14457.8	5.38516	7	0	16380.1	16380.1	5.625	6	116.565	15322.5	15322.5	4.50694
5.4	7	-36.8699	20337	20337	5.625	6	-21.8014	14238.2	14238.2	5.43283	7	-63.4349	17139	17139	5.56732	6	-53.1301	15674	15674	4.94694	1837	2768470	2768470	7	-59.0362	14175.8	14175.8	5.74698	6	-21.8014	13980.7	13980.7	5.38516	7	0	19957.3	19957.3	5.625	6	116.565	15600.1	15600.1	4.50694
5.6	7	-36.8699	19035	19035	5.625	6	-21.8014	14235.5	14235.5	5.43283	7	-63.4349	17146.3	17146.3	5.56732	6	-53.1301	12125.7	12125.7	4.94694	1837	2.68448e+06	2.68448e+06	7	-59.0362	14527.2	14527.2	5.74698	6	-21.8014	19659.1	19659.1	5.38516	7	0	17192.9	17192.9	5.625	6	116.565	13192.8	13192.8	4.50694
5.8	7	-36.8699	19150.2	19150.2	5.625	6	-21.8014	16319.1	16319.1	5.43283	7	-63.4349	15855.4	15855.4	5.56732	6	-53.1301	13498.4	13498.4	4.94694	1837	2.68046e+06	2.68046e+06	7	-59.0362	13845.7	13845.7	5.74698	6	-21.8014	16546.6	16546.6	5.38516	7	0	17554.3	17554.3	5.625	6	116.565	14647	14647	4.50694
6	7	-36.8699	17689.4	17689.4	5.625	6	-21.8014	12830.1	12830.1	5.43283	7	-63.4349	19916.8	19916.8	5.56732	6	-53.1301	14411.1	14411.1	4.94694	1837	2.62293e+06	2.62293e+06	7	-59.0362	16838.3	16838.3	5.74698	6	-21.8014	13297	13297	5.38516	7	0	23404.5	23404.5	5.625	6	116.565	15277.4	15277.4	4.50694
6.2	7	-36.8699	15941.4	15941.4	5.625	6	-21.8014	14132.8	14132.8	5.43283	7	-63.4349	16940.1	16940.1	5.56732	6	-53.1301	12635.9	12635.9	4.94694	1837	2.64375e+06	2.64375e+06	7	-59.0362	12364.3	12364.3	5.74698	6	-21.8014	14494.6	14494.6	5.38516	7	0	14818.5	14818.5	5.625	6	116.565	12120.3	12120.3	4.50694
6.4	7	-36.8699	22336.2	22336.2	5.625	6	-21.8014	11734.4	11734.4	5.43283	7	-63.4349	20562.6	20562.6	5.56732	6	-53.1301	13455.7	13455.7	4.94694	1837	2676555	2676555	7	-59.0362	18080.5	18080.5	5.74698	6	-21.8014	15240.3	15240.3	5.38516	7	0	14143.5	14143.5	5.625	6	116.565	14952.2	14952.2	4.50694
6.6	7	-36.8699	17723.2	17723.2	5.625	6	-21.8014	9820.78	9820.78	5.43283	7	-63.4349	26502.7	26502.7	5.56732	6	-53.1301	14771.8	14771.8	4.94694	1837	2734360	2734360	7	-59.0362	13187.2	13187.2	5.74698	6	-21.8014	17231.1	17231.1	5.38516	7	0	16894.7	16894.7	5.625	6	116.565	15651.1	15651.1	4.50694
6.8	7	-36.8699	22680.1	22680.1	5.625	6	-21.8014	11777	11777	5.43283	7	-63.4349	22465.1	22465.1	5.56732	6	-53.1301	13355.2	13355.2	4.94694	1837	2.70328e+06	2.70328e+06	7	-59.0362	16871.3	16871.3	5.74698	6	-21.8014	12576.8	12576.8	5.38516	7	0	19141.1	19141.1	5.625	6	116.565	14764.6	14764.6	4.50694
7	7	-36.8699	20053.5	20053.5	5.625	6	-21.8014	9977.92	9977.92	5.43283	7	-63.4349	23677.5	23677.5	5.56732	6	-53.1301	10880.8	10880.8	4.94694	1837	2670954	2670954	7	-59.0362	13845.2	13845.2	5.74698	6	-21.8014	15011.6	15011.6	5.38516	7	0	18364.5	18364.5	5.625	6	116.565	16852.2	16852.2	4.50694
7.2	7	-36.8699	20080.4	20080.4	5.625	6	-21.8014	15856.2	15856.2	5.43283	7	-63.4349	24868.3	24868.3	5.56732	6	-53.1301	14941	14941	4.94694	1837	2.72793e+06	2.72793e+06	7	-59.0362	16832.6	16832.6	5.74698	6	-21.8014	13399.1	13399.1	5.38516	7	0	16611.1	16611.1	5.625	6	116.565	16514.9	16514.9	4.50694
7.4	7	-36.8699	18122.4	18122.4	5.625	6	-21.8014	14126.6	14126.6	5.43283	7	-63.4349	25343.7	25343.7	5.56732	6	-53.1301	10660.3	10660.3	4.94694	1837	2.67235e+06	2.67235e+06	7	-59.0362	14692.7	14692.7	5.74698	6	-21.8014	15764.8	15764.8	5.38516	7	0	18240.3	18240.3	5.625	6	116.565	15304.9	15304.9	4.50694
7.6	7	-36.8699	23137.7	23137.7	5.625	6	-21.8014	12612.3	12612.3	5.43283	7	-63.4349	26065.5	26065.5	5.56732	6	-53.1301	14341.5	14341.5	4.94694	1837	2.6822e+06	2.6822e+06	7	-59.0362	20138.8	20138.8	5.74698	6	-21.8014	14997.5	14997.5	5.38516	7	0	18636.4	18636.4	5.625	6	116.565	17108.2	17108.2	4.50694
7.8	7	-36.8699	20187.2	20187.2	5.625	6	-21.8014	15181.6	15181.6	5.43283	7	-63.4349	27366.1	27366.1	5.56732	6	-53.1301	12219.7	12219.7	4.94694	1837	2706686	2706686	7	-59.0362	14616.9	14616.9	5.74698	6	-21.8014	16240.2	16240.2	5.38516	7	0	15523.5	15523.5	5.625	6	116.565	14429.9	14429.9	4.50694
8	7	-36.8699	19826.5	19826.5	5.625	6	-21.8014	16058.7	16058.7	5.43283	7	-63.4349	24680.6	24680.6	5.56732	6	-53.1301	15269.2	15269.2	4.94694	1837	2.76555e+06	2.76555e+06	7	-59.0362	17250.1	17250.1	5.74698	6	-21.8014	19048.6	19048.6	5.38516	7	0	10606.7	10606.7	5.625	6	116.565	13746.7	13746.7	4.50694
8.2	7	-36.8699	22716.9	22716.9	5.625	6	-21.8014	13830	13830	5.43283	7	-63.4349	22458.1	22458.1	5.56732	6	-53.1301	15488.3	15488.3	4.94694	1837	2613066	2613066	7	-59.0362	21707.3	21707.3	5.74698	6	-21.8014	18880.4	18880.4	5.38516	7	0	13769.9	13769.9	5.625	6	116.565	12829.2	12829.2	4.50694
8.4	7	-36.8699	24406.8	24406.8	5.625	6	-21.8014	13026.6	13026.6	5.43283	7	-63.4349	21374.6	21374.6	5.56732	6	-53.1301	13961.4	13961.4	4.94694	1837	2714707	2714707	7	-59.0362	18452.9	18452.9	5.74698	6	-21.8014	22939	22939	5.38516	7	0	18219	18219	5.625	6	116.565	12485.8	12485.8	4.50694
8.6	7	-36.8699	24685.3	24685.3	5.625	6	-21.8014	16827.3	16827.3	5.43283	7	-63.4349	17641.6	17641.6	5.56732	6	-53.1301	14338.5	14338.5	4.94694	1837	2.70079e+06	2.70079e+06	7	-59.0362	21006.9	21006.9	5.74698	6	-21.8014	20186.4	20186.4	5.38516	7	0	18656.6	18656.6	5.625	6	116.565	12421.3	12421.3	4.50694
8.8	7	-36.8699	21144.4	21144.4	5.625	6	-21.8014	11328.6	11328.6	5.43283	7	-63.4349	21712.4	21712.4	5.56732	6	-53.1301	16044.5	16044.5	4.94694	1837	2.71419e+06	2.71419e+06	7	-59.0362	18092.8	18092.8	5.74698	6	-21.8014	18226.2	18226.2	5.38516	7	0	21895.1	21895.1	5.625	6	116.565	13969.3	13969.3	4.50694
9	7	-36.8699	21013.4	21013.4	5.625	6	-21.8014	14671.6	14671.6	5.43283	7	-63.4349	23662.3	23662.3	5.56732	6	-53.1301	14653.3	14653.3	4.94694	1837	2.67169e+06	2.67169e+06	7	-59.0362	16412.9	16412.9	5.74698	6	-21.8014	13570	13570	5.38516	7	0	19555.8	19555.8	5.625	6	116.565	15373.5	15373.5	4.50694
9.2	7	-36.8699	24779.9	24779.9	5.625	6	-21.8014	12235.4	12235.4	5.43283	7	-63.4349	18690	18690	5.56732	6	-53.1301	14097.2	14097.2	4.94694	1837	2617147	2617147	7	-59.0362	16160.2	16160.2	5.74698	6	-21.8014	14456.6	14456.6	5.38516	7	0	24092.1	24092.1	5.625	6	116.565	12627.7	12627.7	4.50694
9.4	7	-36.8699	25002.2	25002.2	5.625	6	-21.8014	14626.6	14626.6	5.43283	7	-63.4349	20934.5	20934.5	5.56732	6	-53.1301	14552.4	14552.4	4.94694	1837	2.62439e+06	2.62439e+06	7	-59.0362	14533.2	14533.2	5.74698	6	-21.8014	12672	12672	5.38516	7	0	27577.9	27577.9	5.625	6	116.565	14222.8	14222.8	4.50694
9.6	7	-36.8699	22821.7	22821.7	5.625	6	-21.8014	11674.2	11674.2	5.43283	7	-63.4349	24928.5	24928.5	5.56732	6	-53.1301	18055.6	18055.6	4.94694	1837	2.67647e+06	2.67647e+06	7	-59.0362	14381.4	14381.4	5.74698	6	-21.8014	13690.1	13690.1	5.38516	7	0	25384.7	25384.7	5.625	6	116.565	12377.9	12377.9	4.50694
9.8	7	-36.8699	18048.3	18048.3	5.625	6	-21.8014	16618.2	16618.2	5.43283	7	-63.4349	16561.6	16561.6	5.56732	6	-53.1301	13972.4	13972.4	4.94694	1837	2.68645e+06	2.68645e+06	7	-59.0362	17044.3	17044.3	5.74698	6	-21.8014	15334.3	15334.3	5.38516	7	0	23752.8	23752.8	5.625	6	116.565	17956.9	17956.9	4.50694
10	7	-36.8699	18945.9	18945.9	5.625	6	-21.8014	16686.7	16686.7	5.43283	7	-63.4349	24114.7	24114.7	5.56732	6	-53.1301	14562.8	14562.8	4.94694	1837	2.65931e+06	2.65931e+06	7	-59.0362	15357.2	15357.2	5.74698	6	-21.8014	14565.5	14565.5	5.38516	7	0	16380	16380	5.625	6	116.565	14061.1	14061.1	4.50694
10.2	7	-36.8699	21573.9	21573.9	5.625	6	-21.8014	10117.7	10117.7	5.43283	7	-63.4349	22464.2	22464.2	5.56732	6	-53.1301	12026.5	12026.5	4.94694	1837	2829732	2829732	7	-59.0362	20215.1	20215.1	5.74698	6	-21.8014	17375.2	17375.2	5.38516	7	0	21094.3	21094.3	5.625	6	116.565	15687.6	15687.6	4.50694
10.4	7	-36.8699	17753.7	17753.7	5.625	6	-21.8014	12245.4	12245.4	5.43283	7	-63.4349	18170.3	18170.3	5.56732	6	-53.1301	13794.2	13794.2	4.94694	1837	2.63663e+06	2.63663e+06	7	-59.0362	15157.8	15157.8	5.74698	6	-21.8014	13845.5	13845.5	5.38516	7	0	19800.8	19800.8	5.625	6	116.565	13812.7	13812.7	4.50694
10.6	7	-36.8699	21626.2	21626.2	5.625	6	-21.8014	14608.7	14608.7	5.43283	7	-63.4349	23627	23627	5.56732	6	-53.1301	13727.2	13727.2	4.94694	1837	2.69381e+06	2.69381e+06	7	-59.0362	14215.4	14215.4	5.74698	6	-21.8014	14376.7	14376.7	5.38516	7	0	23585	23585	5.625	6	116.565	12410.1	12410.1	4.50694
10.8	7	-36.8699	21523.5	21523.5	5.625	6	-21.8014	13222.6	13222.6	5.43283	7	-63.4349	25787	25787	5.56732	6	-53.1301	13058.4	13058.4	4.94694	1837	2.65144e+06	2.65144e+06	7	-59.0362	11831.5	11831.5	5.74698	6	-21.8014	12763.4	12763.4	5.38516	7	0	18507.4	18507.4	5.625	6	116.565	16410.9	16410.9	4.50694
11	7	-36.8699	20061.8	20061.8	5.625	6	-21.8014	14813.5	14813.5	5.43283	7	-63.4349	20211.4	20211.4	5.56732	6	-53.1301	12954.5	12954.5	4.94694	1837	2.70719e+06	2.70719e+06	7	-59.0362	13164.5	13164.5	5.74698	6	-21.8014	16196.1	16196.1	5.38516	7	0	15322	15322	5.625	6	116.565	12767.9	12767.9	4.50694
11.2	7	-36.8699	16210	16210	5.625	6	-21.8014	13309.7	13309.7	5.43283	7	-63.4349	17551.4	17551.4	5.56732	6	-53.1301	13188.1	13188.1	4.94694	1837	2756302	2756302	7	-59.0362	16632.9	16632.9	5.74698	6	-21.8014	13090	13090	5.38516	7	0	21367.8	21367.8	5.625	6	116.565	15306.4	15306.4	4.50694
11.4	7	-36.8699	19117.2	19117.2	5.625	6	-21.8014	12967.7	12967.7	5.43283	7	-63.4349	19169.4	19169.4	5.56732	6	-53.1301	12284.9	12284.9	4.94694	1837	2.68056e+06	2.68056e+06	7	-59.0362	12407.9	12407.9	5.74698	6	-21.8014	15632.2	15632.2	5.38516	7	0	12982.5	12982.5	5.625	6	116.565	16294.9	16294.9	4.50694
11.6	7	-36.8699	20474.5	20474.5	5.625	6	-21.8014	13103.1	13103.1	5.43283	7	-63.4349	19113	19113	5.56732	6	-53.1301	14989.4	14989.4	4.94694	1837	2.75661e+06	2.75661e+06	7	-59.0362	15543.5	15543.5	5.74698	6	-21.8014	13284.9	13284.9	5.38516	7	0	14897	14897	5.625	6	116.565	15147.1	15147.1	4.50694
11.8	7	-36.8699	16016.9	16016.9	5.625	6	-21.8014	11138.2	11138.2	5.43283	7	-63.4349	22347.9	22347.9	5.56732	6	-53.1301	14656.5	14656.5	4.94694	1837	2.70882e+06	2.70882e+06	7	-59.0362	15137.2	15137.2	5.74698	6	-21.8014	14932.7	14932.7	5.38516	7	0	10928.7	10928.7	5.625	6	116.565	15851	15851	4.50694
12	7	-36.8699	18003.4	18003.4	5.625	6	-21.8014	12830.4	12830.4	5.43283	7	-63.4349	20068.6	20068.6	5.56732	6	-53.1301	13921.4	13921.4	4.94694	1837	2692501	2692501	7	-59.0362	17693	17693	5.74698	6	-21.8014	11728.8	11728.8	5.38516	7	0	13185.2	13185.2	5.625	6	116.565	17101.6	17101.6	4.50694
12.2	7	-36.8699	22996.5	22996.5	5.625	6	-21.8014	14954	14954	5.43283	7	-63.4349	19250.2	19250.2	5.56732	6	-53.1301	13843.9	13843.9	4.94694	1837	2.65669e+06	2.65669e+06	7	-59.0362	14604.1	14604.1	5.74698	6	-21.8014	10736	10736	5.38516	7	0	14988.3	14988.3	5.625	6	116.565	11694.2	11694.2	4.50694
12.4	7	-36.8699	18220.5	18220.5	5.625	6	-21.8014	13411.1	13411.1	5.43283	7	-63.4349	18480.9	18480.9	5.56732	6	-53.1301	11925.2	11925.2	4.94694	1837	2.72738e+06	2.72738e+06	7	-59.0362	15551.6	15551.6	5.74698	6	-21.8014	16152	16152	5.38516	7	0	13682.2	13682.2	5.625	6	116.565	14787.1	14787.1	4.50694
12.6	7	-36.8699	21993.4	21993.4	5.625	6	-21.8014	10160.6	10160.6	5.43283	7	-63.4349	18795.3	18795.3	5.56732	6	-53.1301	11149.8	11149.8	4.94694	1837	2700697	2700697	7	-59.0362	15397	15397	5.74698	6	-21.8014	12715	12715	5.38516	7	0	16418.5	16418.5	5.625	6	116.565	12685.1	12685.1	4.50694
12.8	7	-36.8699	21481.4	21481.4	5.625	6	-21.8014	17497.4	17497.4	5.43283	7	-63.4349	17469.1	17469.1	5.56732	6	-53.1301	16458.8	16458.8	4.94694	1837	2.75202e+06	2.75202e+06	7	-59.0362	16077.5	16077.5	5.74698	6	-21.8014	11820.1	11820.1	5.38516	7	0	14790.7	14790.7	5.625	6	116.565	12735.1	12735.1	4.50694
13	7	-36.8699	20776.6	20776.6	5.625	6	-21.8014	14180.3	14180.3	5.43283	7	-63.4349	18452.9	18452.9	5.56732	6	-53.1301	16213.9	16213.9	4.94694	1837	2.69747e+06	2.69747e+06	7	-59.0362	13289.4	13289.4	5.74698	6	-21.8014	12589.9	12589.9	5.38516	7	0	12770.2	12770.2	5.625	6	116.565	15518	15518	4.50694
13.2	7	-36.8699	22527.9	22527.9	5.625	6	-21.8014	12330.6	12330.6	5.43283	7	-63.4349	17952.3	17952.3	5.56732	6	-53.1301	14257.3	14257.3	4.94694	1837	2.75406e+06	2.75406e+06	7	-59.0362	14753.2	14753.2	5.74698	6	-21.8014	15982.8	15982.8	5.38516	7	0	15819.9	15819.9	5.625	6	116.565	15244.1	15244.1	4.50694
13.4	7	-36.8699	20187.2	20187.2	5.625	6	-21.8014	14862.1	14862.1	5.43283	7	-63.4349	21094.1	21094.1	5.56732	6	-53.1301	13130.8	13130.8	4.94694	1837	2.73883e+06	2.73883e+06	7	-59.0362	14708.2	14708.2	5.74698	6	-21.8014	13418.4	13418.4	5.38516	7	0	18295.4	18295.4	5.625	6	116.565	17777.6	17777.6	4.50694
13.6	7	-36.8699	26943.7	26943.7	5.625	6	-21.8014	16594.3	16594.3	5.43283	7	-63.4349	19513.8	19513.8	5.56732	6	-53.1301	14275.4	14275.4	4.94694	1837	2783859	2783859	7	-59.0362	12619	12619	5.74698	6	-21.8014	15191.2	15191.2	5.38516	7	0	21089.4	21089.4	5.625	6	116.565	16147.3	16147.3	4.50694
13.8	7	-36.8699	20569.1	20569.1	5.625	6	-21.8014	14698.9	14698.9	5.43283	7	-63.4349	20644.8	20644.8	5.56732	6	-53.1301	14439.5	14439.5	4.94694	1837	2.76398e+06	2.76398e+06	7	-59.0362	14465.5	14465.5	5.74698	6	-21.8014	11850.4	11850.4	5.38516	7	0	28633.7	28633.7	5.625	6	116.565	14534.2	14534.2	4.50694
14	7	-36.8699	25470.3	25470.3	5.625	6	-21.8014	18171.8	18171.8	5.43283	7	-63.4349	19079	19079	5.56732	6	-53.1301	15128.3	15128.3	4.94694	1837	2.72971e+06	2.72971e+06	7	-59.0362	14554.7	14554.7	5.74698	6	-21.8014	9960.78	9960.78	5.38516	7	0	24291.5	24291.5	5.625	6	116.565	15027.8	15027.8	4.50694
14.2	7	-36.8699	27197.9	27197.9	5.625	6	-21.8014	16572.7	16572.7	5.43283	7	-63.4349	19121.9	19121.9	5.56732	6	-53.1301	14529.3	14529.3	4.94694	1837	2.76423e+06	2.76423e+06	7	-59.0362	14533.1	14533.1	5.74698	6	-21.8014	15002	15002	5.38516	7	0	27067.7	27067.7	5.625	6	116.565	14501.9	14501.9	4.50694
14.4	7	-36.8699	26222.7	26222.7	5.625	6	-21.8014	15343.4	15343.4	5.43283	7	-63.4349	20695.2	20695.2	5.56732	6	-53.1301	13387.1	13387.1	4.94694	1837	2.73715e+06	2.73715e+06	7	-59.0362	13873.5	13873.5	5.74698	6	-21.8014	10731	10731	5.38516	7	0	28648.5	28648.5	5.625	6	116.565	15574	15574	4.50694
14.6	7	-36.8699	22762.6	22762.6	5.625	6	-21.8014	12041.4	12041.4	5.43283	7	-63.4349	19134	19134	5.56732	6	-53.1301	15376.7	15376.7	4.94694	1837	2.77268e+06	2.77268e+06	7	-59.0362	14650.3	14650.3	5.74698	6	-21.8014	14662.3	14662.3	5.38516	7	0	24569.6	24569.6	5.625	6	116.565	10974.8	10974.8	4.50694
14.8	7	-36.8699	24068.2	24068.2	5.625	6	-21.8014	15325	15325	5.43283	7	-63.4349	21951.7	21951.7	5.56732	6	-53.1301	11655.7	11655.7	4.94694	1837	2718872	2718872	7	-59.0362	16621.4	16621.4	5.74698	6	-21.8014	11185	11185	5.38516	7	0	27803.6	27803.6	5.625	6	116.565	14727.1	14727.1	4.50694
15	7	-36.8699	25009.4	25009.4	5.625	6	-21.8014	14304.1	14304.1	5.43283	7	-63.4349	16724.2	16724.2	5.56732	6	-53.1301	11129.4	11129.4	4.94694	1837	2.72722e+06	2.72722e+06	7	-59.0362	14170	14170	5.74698	6	-21.8014	10120.9	10120.9	5.38516	7	0	20649.1	20649.1	5.625	6	116.565	13540.7	13540.7	4.50694
15.2	7	-36.8699	18917.2	18917.2	5.625	6	-21.8014	12590.6	12590.6	5.43283	7	-63.4349	18101.3	18101.3	5.56732	6	-53.1301	13972.7	13972.7	4.94694	1837	2.75406e+06	2.75406e+06	7	-59.0362	14941.2	14941.2	5.74698	6	-21.8014	13589.5	13589.5	5.38516	7	0	24688.8	24688.8	5.625	6	116.565	15183.4	15183.4	4.50694
15.4	7	-36.8699	22045.6	22045.6	5.625	6	-21.8014	13403.4	13403.4	5.43283	7	-63.4349	16619.8	16619.8	5.56732	6	-53.1301	10695.6	10695.6	4.94694	1837	2.72759e+06	2.72759e+06	7	-59.0362	17996	17996	5.74698	6	-21.8014	13741.4	13741.4	5.38516	7	0	29871.6	29871.6	5.625	6	116.565	15311.6	15311.6	4.50694
15.6	7	-36.8699	16409.4	16409.4	5.625	6	-21.8014	13756.6	13756.6	5.43283	7	-63.4349	17843.4	17843.4	5.56732	6	-53.1301	17260.2	17260.2	4.94694	1837	2.67299e+06	2.67299e+06	7	-59.0362	18048.1	18048.1	5.74698	6	-21.8014	14586.5	14586.5	5.38516	7	0	20379.1	20379.1	5.625	6	116.565	18159.7	18159.7	4.50694
15.8	7	-36.8699	17978.7	17978.7	5.625	6	-21.8014	11702.9	11702.9	5.43283	7	-63.4349	20344.8	20344.8	5.56732	6	-53.1301	13073.8	13073.8	4.94694	1837	2.74632e+06	2.74632e+06	7	-59.0362	19829.4	19829.4	5.74698	6	-21.8014	12019.7	12019.7	5.38516	7	0	24289.8	24289.8	5.625	6	116.565	12233.2	12233.2	4.50694
16	7	-36.8699	21370.8	21370.8	5.625	6	-21.8014	15589.5	15589.5	5.43283	7	-63.4349	19622.3	19622.3	5.56732	6	-53.1301	13167.8	13167.8	4.94694	1837	2758709	2758709	7	-59.0362	20519.3	20519.3	5.74698	6	-21.8014	14126	14126	5.38516	7	0	23434.2	23434.2	5.625	6	116.565	13067.6	13067.6	4.50694
16.2	7	-36.8699	22656.3	22656.3	5.625	6	-21.8014	15242	15242	5.43283	7	-63.4349	23914.9	23914.9	5.56732	6	-53.1301	12984.2	12984.2	4.94694	1837	2.77547e+06	2.77547e+06	7	-59.0362	22277.4	22277.4	5.74698	6	-21.8014	11210.4	11210.4	5.38516	7	0	22977.8	22977.8	5.625	6	116.565	17149.8	17149.8	4.50694
16.4	7	-36.8699	22636.3	22636.3	5.625	6	-21.8014	12812.3	12812.3	5.43283	7	-63.4349	19287.4	19287.4	5.56732	6	-53.1301	16033.7	16033.7	4.94694	1837	2757851	2757851	7	-59.0362	23511.5	23511.5	5.74698	6	-21.8014	10989.2	10989.2	5.38516	7	0	25182.5	25182.5	5.625	6	116.565	12727.6	12727.6	4.50694
16.6	7	-36.8699	22278.9	22278.9	5.625	6	-21.8014	13254.4	13254.4	5.43283	7	-63.4349	22105.1	22105.1	5.56732	6	-53.1301	16534.1	16534.1	4.94694	1837	2806728	2806728	7	-59.0362	22085.7	22085.7	5.74698	6	-21.8014	12643.9	12643.9	5.38516	7	0	22953	22953	5.625	6	116.565	13888.5	13888.5	4.50694
16.8	7	-36.8699	18049.7	18049.7	5.625	6	-21.8014	14578.8	14578.8	5.43283	7	-63.4349	18157.1	18157.1	5.56732	6	-53.1301	14536.8	14536.8	4.94694	1837	2.74628e+06	2.74628e+06	7	-59.0362	19750.8	19750.8	5.74698	6	-21.8014	15271.2	15271.2	5.38516	7	0	25943.7	25943.7	5.625	6	116.565	12577.9	12577.9	4.50694
17	7	-36.8699	21126.1	21126.1	5.625	6	-21.8014	13049.6	13049.6	5.43283	7	-63.4349	19857.6	19857.6	5.56732	6	-53.1301	16576.8	16576.8	4.94694	1837	2850321	2850321	7	-59.0362	20010.7	20010.7	5.74698	6	-21.8014	11105.7	11105.7	5.38516	7	0	25157.1	25157.1	5.625	6	116.565	12573.2	12573.2	4.50694
17.2	7	-36.8699	18238.1	18238.1	5.625	6	-21.8014	15471.3	15471.3	5.43283	7	-63.4349	21009.2	21009.2	5.56732	6	-53.1301	15673.7	15673.7	4.94694	1837	2.79147e+06	2.79147e+06	7	-59.0362	22761	22761	5.74698	6	-21.8014	14268.9	14268.9	5.38516	7	0	30814	30814	5.625	6	116.565	13727.3	13727.3	4.50694
17.4	7	-36.8699	25563.5	25563.5	5.625	6	-21.8014	16831.7	16831.7	5.43283	7	-63.4349	18896.3	18896.3	5.56732	6	-53.1301	13046.6	13046.6	4.94694	1837	2.81403e+06	2.81403e+06	7	-59.0362	19837.8	19837.8	5.74698	6	-21.8014	13789.1	13789.1	5.38516	7	0	25558.9	25558.9	5.625	6	116.565	9998.05	9998.05	4.50694
17.6	7	-36.8699	18933.1	18933.1	5.625	6	-21.8014	14229.6	14229.6	5.43283	7	-63.4349	15869.1	15869.1	5.56732	6	-53.1301	16759.9	16759.9	4.94694	1837	2.72056e+06	2.72056e+06	7	-59.0362	21049.1	21049.1	5.74698	6	-21.8014	13744.6	13744.6	5.38516	7	0	23330	23330	5.625	6	116.565	14673.6	14673.6	4.50694
17.8	7	-36.8699	18656.8	18656.8	5.625	6	-21.8014	12557.6	12557.6	5.43283	7	-63.4349	21721.5	21721.5	5.56732	6	-53.1301	16027.4	16027.4	4.94694	1837	2.70577e+06	2.70577e+06	7	-59.0362	21789.3	21789.3	5.74698	6	-21.8014	12392.2	12392.2	5.38516	7	0	25019.1	25019.1	5.625	6	116.565	13185.2	13185.2	4.50694
18	7	-36.8699	16780.2	16780.2	5.625	6	-21.8014	10610.4	10610.4	5.43283	7	-63.4349	22878.3	22878.3	5.56732	6	-53.1301	12092.4	12092.4	4.94694	1837	2.64544e+06	2.64544e+06	7	-59.0362	21570.2	21570.2	5.74698	6	-21.8014	13971.2	13971.2	5.38516	7	0	25054.2	25054.2	5.625	6	116.565	13751.3	13751.3	4.50694
18.2	7	-36.8699	22289.1	22289.1	5.625	6	-21.8014	15803.3	15803.3	5.43283	7	-63.4349	16014	16014	5.56732	6	-53.1301	16462.7	16462.7	4.94694	1837	2753497	2753497	7	-59.0362	17713.6	17713.6	5.74698	6	-21.8014	12522.8	12522.8	5.38516	7	0	21681.5	21681.5	5.625	6	116.565	12996.6	12996.6	4.50694
18.4	7	-36.8699	23789	23789	5.625	6	-21.8014	16009	16009	5.43283	7	-63.4349	20742.2	20742.2	5.56732	6	-53.1301	14713.3	14713.3	4.94694	1837	2.80466e+06	2.80466e+06	7	-59.0362	25358.9	25358.9	5.74698	6	-21.8014	13239.9	13239.9	5.38516	7	0	22850.4	22850.4	5.625	6	116.565	16985.4	16985.4	4.50694
18.6	7	-36.8699	20752.7	20752.7	5.625	6	-21.8014	16176.7	16176.7	5.43283	7	-63.4349	18229	18229	5.56732	6	-53.1301	14919.1	14919.1	4.94694	1837	2.78198e+06	2.78198e+06	7	-59.0362	20507.2	20507.2	5.74698	6	-21.8014	10570.5	10570.5	5.38516	7	0	28678.4	28678.4	5.625	6	116.565	16306.9	16306.9	4.50694
18.8	7	-36.8699	19893.5	19893.5	5.625	6	-21.8014	16071	16071	5.43283	7	-63.4349	14004.7	14004.7	5.56732	6	-53.1301	11252.6	11252.6	4.94694	1837	2.78894e+06	2.78894e+06	7	-59.0362	21075.2	21075.2	5.74698	6	-21.8014	13851.5	13851.5	5.38516	7	0	24729.3	24729.3	5.625	6	116.565	12106.9	12106.9	4.50694
19	7	-36.8699	22812.3	22812.3	5.625	6	-21.8014	16275.3	16275.3	5.43283	7	-63.4349	17710	17710	5.56732	6	-53.1301	14411.4	14411.4	4.94694	1837	2.75393e+06	2.75393e+06	7	-59.0362	18158	18158	5.74698	6	-21.8014	18800.8	18800.8	5.38516	7	0	23451.1	23451.1	5.625	6	116.565	11037.5	11037.5	4.50694
19.2	7	-36.8699	22372.6	22372.6	5.625	6	-21.8014	15559.5	15559.5	5.43283	7	-63.4349	18161.6	18161.6	5.56732	6	-53.1301	13620.1	13620.1	4.94694	1837	2763070	2763070	7	-59.0362	17497.5	17497.5	5.74698	6	-21.8014	15158.1	15158.1	5.38516	7	0	25653.4	25653.4	5.625	6	116.565	15342.5	15342.5	4.50694
19.4	7	-36.8699	29340.1	29340.1	5.625	6	-21.8014	16096.2	16096.2	5.43283	7	-63.4349	16462.1	16462.1	5.56732	6	-53.1301	18182.1	18182.1	4.94694	1837	2.76327e+06	2.76327e+06	7	-59.0362	18906.8	18906.8	5.74698	6	-21.8014	14842.8	14842.8	5.38516	7	0	28455.9	28455.9	5.625	6	116.565	13036.4	13036.4	4.50694
19.6	7	-36.8699	24739.5	24739.5	5.625	6	-21.8014	13195.8	13195.8	5.43283	7	-63.4349	14587.5	14587.5	5.56732	6	-53.1301	17171.6	17171.6	4.94694	1837	2.67511e+06	2.67511e+06	7	-59.0362	16271.8	16271.8	5.74698	6	-21.8014	15171.3	15171.3	5.38516	7	0	21134.3	21134.3	5.625	6	116.565	13456.2	13456.2	4.50694
19.8	7	-36.8699	25410.9	25410.9	5.625	6	-21.8014	18743	18743	5.43283	7	-63.4349	19979.7	19979.7	5.56732	6	-53.1301	12764.9	12764.9	4.94694	1837	2705534	2705534	7	-59.0362	19002.2	19002.2	5.74698	6	-21.8014	15038.8	15038.8	5.38516	7	0	22914.9	22914.9	5.625	6	116.565	14505.1	14505.1	4.50694
20	7	-36.8699	31863	31863	5.625	6	-21.8014	22610.5	22610.5	5.43283	7	-63.4349	16293	16293	5.56732	6	-53.1301	20118.3	20118.3	4.94694	1837	2.79952e+06	2.79952e+06	7	-59.0362	16164.2	16164.2	5.74698	6	-21.8014	14686.2	14686.2	5.38516	7	0	18326.4	18326.4	5.625	6	116.565	15273.9	15273.9	4.50694
20.2	7	-36.8699	28346.2	28346.2	5.625	6	-21.8014	21202.2	21202.2	5.43283	7	-63.4349	15154.2	15154.2	5.56732	6	-53.1301	14428.1	14428.1	4.94694	1837	2.74138e+06	2.74138e+06	7	-59.0362	12046.1	12046.1	5.74698	6	-21.8014	11672.9	11672.9	5.38516	7	0	21307.6	21307.6	5.625	6	116.565	12213.7	12213.7	4.50694
20.4	7	-36.8699	28945.4	28945.4	5.625	6	-21.8014	22147.6	22147.6	5.43283	7	-63.4349	17635.2	17635.2	5.56732	6	-53.1301	11248.4	11248.4	4.94694	1837	2.76231e+06	2.76231e+06	7	-59.0362	15243.7	15243.7	5.74698	6	-21.8014	12304.6	12304.6	5.38516	7	0	17343.3	17343.3	5.625	6	116.565	12790.6	12790.6	4.50694
20.6	7	-36.8699	35322.8	35322.8	5.625	6	-21.8014	19500.2	19500.2	5.43283	7	-63.4349	15795.1	15795.1	5.56732	6	-53.1301	14554.7	14554.7	4.94694	1837	2820478	2820478	7	-59.0362	12998	12998	5.74698	6	-21.8014	20845.8	20845.8	5.38516	7	0	20887.5	20887.5	5.625	6	116.565	13836	13836	4.50694
20.8	7	-36.8699	30493.1	30493.1	5.625	6	-21.8014	20332.9	20332.9	5.43283	7	-63.4349	19655.4	19655.4	5.56732	6	-53.1301	15202.8	15202.8	4.94694	1837	2.7078e+06	2.7078e+06	7	-59.0362	15081	15081	5.74698	6	-21.8014	22101.2	22101.2	5.38516	7	0	18375.7	18375.7	5.625	6	116.565	15132.5	15132.5	4.50694
21	7	-36.8699	28136.8	28136.8	5.625	6	-21.8014	19302.6	19302.6	5.43283	7	-63.4349	13860.9	13860.9	5.56732	6	-53.1301	16103.5	16103.5	4.94694	1837	2794704	2794704	7	-59.0362	16566.3	16566.3	5.74698	6	-21.8014	15784	15784	5.38516	7	0	15512.3	15512.3	5.625	6	116.565	19426.8	19426.8	4.50694
21.2	7	-36.8699	29624.7	29624.7	5.625	6	-21.8014	23285.3	23285.3	5.43283	7	-63.4349	15386.9	15386.9	5.56732	6	-53.1301	15210.4	15210.4	4.94694	1837	2776532	2776532	7	-59.0362	14238.9	14238.9	5.74698	6	-21.8014	16863.1	16863.1	5.38516	7	0	15717.8	15717.8	5.625	6	116.565	12878.4	12878.4	4.50694
21.4	7	-36.8699	23911	23911	5.625	6	-21.8014	19535.9	19535.9	5.43283	7	-63.4349	15572.9	15572.9	5.56732	6	-53.1301	13360	13360	4.94694	1837	2.85493e+06	2.85493e+06	7	-59.0362	17041.2	17041.2	5.74698	6	-21.8014	17837.7	17837.7	5.38516	7	0	17716.1	17716.1	5.625	6	116.565	11542.2	11542.2	4.50694
21.6	7	-36.8699	30829.6	30829.6	5.625	6	-21.8014	15928.6	15928.6	5.43283	7	-63.4349	13722.6	13722.6	5.56732	6	-53.1301	13846.9	13846.9	4.94694	1837	2.73123e+06	2.73123e+06	7	-59.0362	16193.2	16193.2	5.74698	6	-21.8014	17136.2	17136.2	5.38516	7	0	13524.6	13524.6	5.625	6	116.565	13478.8	13478.8	4.50694
21.8	7	-36.8699	32228.4	32228.4	5.625	6	-21.8014	23902.7	23902.7	5.43283	7	-63.4349	16953.8	16953.8	5.56732	6	-53.1301	14116.4	14116.4	4.94694	1837	2781380	2781380	7	-59.0362	16700.6	16700.6	5.74698	6	-21.8014	14809.1	14809.1	5.38516	7	0	17558.4	17558.4	5.625	6	116.565	12890.4	12890.4	4.50694
22	7	-36.8699	28497.3	28497.3	5.625	6	-21.8014	20804.7	20804.7	5.43283	7	-63.4349	16357.4	16357.4	5.56732	6	-53.1301	14647.9	14647.9	4.94694	1837	2831941	2831941	7	-59.0362	13598	13598	5.74698	6	-21.8014	12920.2	12920.2	5.38516	7	0	16100.6	16100.6	5.625	6	116.565	14269.7	14269.7	4.50694
22.2	7	-36.8699	27250.9	27250.9	5.625	6	-21.8014	18660	18660	5.43283	7	-63.4349	17356	17356	5.56732	6	-53.1301	17361.6	17361.6	4.94694	1837	2.82273e+06	2.82273e+06	7	-59.0362	16506.9	16506.9	5.74698	6	-21.8014	16726.1	16726.1	5.38516	7	0	13391.7	13391.7	5.625	6	116.565	15430.4	15430.4	4.50694
22.4	7	-36.8699	32688	32688	5.625	6	-21.8014	15915.3	15915.3	5.43283	7	-63.4349	22800.1	22800.1	5.56732	6	-53.1301	15919.1	15919.1	4.94694	1837	2.82487e+06	2.82487e+06	7	-59.0362	16694.5	16694.5	5.74698	6	-21.8014	16633.4	16633.4	5.38516	7	0	16373.8	16373.8	5.625	6	116.565	13112.4	13112.4	4.50694
22.6	7	-36.8699	31721.3	31721.3	5.625	6	-21.8014	15477.1	15477.1	5.43283	7	-63.4349	23643.1	23643.1	5.56732	6	-53.1301	13860.9	13860.9	4.94694	1837	2.79475e+06	2.79475e+06	7	-59.0362	17824.3	17824.3	5.74698	6	-21.8014	13607.8	13607.8	5.38516	7	0	17029.4	17029.4	5.625	6	116.565	13201.7	13201.7	4.50694
22.8	7	-36.8699	26723.3	26723.3	5.625	6	-21.8014	17538.7	17538.7	5.43283	7	-63.4349	22921	22921	5.56732	6	-53.1301	13951.9	13951.9	4.94694	1837	2.81062e+06	2.81062e+06	7	-59.0362	13802	13802	5.74698	6	-21.8014	14709.1	14709.1	5.38516	7	0	13151.1	13151.1	5.625	6	116.565	15086.8	15086.8	4.50694
23	7	-36.8699	29251.9	29251.9	5.625	6	-21.8014	17824.4	17824.4	5.43283	7	-63.4349	19797.5	19797.5	5.56732	6	-53.1301	17797.4	17797.4	4.94694	1837	2.76148e+06	2.76148e+06	7	-59.0362	16133.6	16133.6	5.74698	6	-21.8014	11941.7	11941.7	5.38516	7	0	18459.6	18459.6	5.625	6	116.565	12213.8	12213.8	4.50694
23.2	7	-36.8699	27216.3	27216.3	5.625	6	-21.8014	16763.5	16763.5	5.43283	7	-63.4349	16352.3	16352.3	5.56732	6	-53.1301	15929.8	15929.8	4.94694	1837	2.81853e+06	2.81853e+06	7	-59.0362	15407.2	15407.2	5.74698	6	-21.8014	15535.2	15535.2	5.38516	7	0	15767.9	15767.9	5.625	6	116.565	14321.1	14321.1	4.50694
23.4	7	-36.8699	24892.4	24892.4	5.625	6	-21.8014	13751.7	13751.7	5.43283	7	-63.4349	16471.8	16471.8	5.56732	6	-53.1301	16052.9	16052.9	4.94694	1837	2.7721e+06	2.7721e+06	7	-59.0362	12413.2	12413.2	5.74698	6	-21.8014	12879.8	12879.8	5.38516	7	0	19242.7	19242.7	5.625	6	116.565	15513.5	15513.5	4.50694
23.6	7	-36.8699	28306.7	28306.7	5.625	6	-21.8014	13293.7	13293.7	5.43283	7	-63.4349	13938.3	13938.3	5.56732	6	-53.1301	13745.9	13745.9	4.94694	1837	2.82752e+06	2.82752e+06	7	-59.0362	16904	16904	5.74698	6	-21.8014	12230.4	12230.4	5.38516	7	0	22123.2	22123.2	5.625	6	116.565	12378.7	12378.7	4.50694
23.8	7	-36.8699	26882.2	26882.2	5.625	6	-21.8014	10440.1	10440.1	5.43283	7	-63.4349	16773.7	16773.7	5.56732	6	-53.1301	15649.8	15649.8	4.94694	1837	2.83763e+06	2.83763e+06	7	-59.0362	15341.5	15341.5	5.74698	6	-21.8014	14934.1	14934.1	5.38516	7	0	19719.8	19719.8	5.625	6	116.565	15208.5	15208.5	4.50694
24	7	-36.8699	22006.6	22006.6	5.625	6	-21.8014	14572.5	14572.5	5.43283	7	-63.4349	22489.3	22489.3	5.56732	6	-53.1301	13537.9	13537.9	4.94694	1837	2820445	2820445	7	-59.0362	10770.2	10770.2	5.74698	6	-21.8014	13703.6	13703.6	5.38516	7	0	19341.9	19341.9	5.625	6	116.565	12993.4	12993.4	4.50694
24.2	7	-36.8699	31361.6	31361.6	5.625	6	-21.8014	12551.2	12551.2	5.43283	7	-63.4349	15405.7	15405.7	5.56732	6	-53.1301	13845.5	13845.5	4.94694	1837	2.84647e+06	2.84647e+06	7	-59.0362	13151.4	13151.4	5.74698	6	-21.8014	16412.9	16412.9	5.38516	7	0	21177.1	21177.1	5.625	6	116.565	11197.5	11197.5	4.50694
24.4	7	-36.8699	29254.7	29254.7	5.625	6	-21.8014	15120.8	15120.8	5.43283	7	-63.4349	12758.5	12758.5	5.56732	6	-53.1301	16688.8	16688.8	4.94694	1837	2.81623e+06	2.81623e+06	7	-59.0362	15828.3	15828.3	5.74698	6	-21.8014	13240.8	13240.8	5.38516	7	0	18436.7	18436.7	5.625	6	116.565	15382.7	15382.7	4.50694
24.6	7	-36.8699	28410	28410	5.625	6	-21.8014	17446.7	17446.7	5.43283	7	-63.4349	12626.8	12626.8	5.56732	6	-53.1301	16074.3	16074.3	4.94694	1837	2.81844e+06	2.81844e+06	7	-59.0362	12706.6	12706.6	5.74698	6	-21.8014	15333.2	15333.2	5.38516	7	0	17483	17483	5.625	6	116.565	11268.4	11268.4	4.50694
24.8	7	-36.8699	27098.2	27098.2	5.625	6	-21.8014	15940.1	15940.1	5.43283	7	-63.4349	15256.1	15256.1	5.56732	6	-53.1301	16275.1	16275.1	4.94694	1837	2728359	2728359	7	-59.0362	14560.5	14560.5	5.74698	6	-21.8014	14560.6	14560.6	5.38516	7	0	18152.2	18152.2	5.625	6	116.565	11344.4	11344.4	4.50694
25	7	-36.8699	27046.4	27046.4	5.625	6	-21.8014	10550.7	10550.7	5.43283	7	-63.4349	18698.1	18698.1	5.56732	6	-53.1301	16334.6	16334.6	4.94694	1837	2.70127e+06	2.70127e+06	7	-59.0362	15187.1	15187.1	5.74698	6	-21.8014	14261.6	14261.6	5.38516	7	0	22373.7	22373.7	5.625	6	116.565	13072.5	13072.5	4.50694
25.2	7	-36.8699	26988.7	26988.7	5.625	6	-21.8014	12703.4	12703.4	5.43283	7	-63.4349	16685.7	16685.7	5.56732	6	-53.1301	13614	13614	4.94694	1837	2.81608e+06	2.81608e+06	7	-59.0362	18188.5	18188.5	5.74698	6	-21.8014	11080.2	11080.2	5.38516	7	0	19424.8	19424.8	5.625	6	116.565	15252.7	15252.7	4.50694
25.4	7	-36.8699	26088.8	26088.8	5.625	6	-21.8014	14148.7	14148.7	5.43283	7	-63.4349	18594.4	18594.4	5.56732	6	-53.1301	16561.1	16561.1	4.94694	1837	2.7948e+06	2.7948e+06	7	-59.0362	14213.9	14213.9	5.74698	6	-21.8014	14839.8	14839.8	5.38516	7	0	20373.2	20373.2	5.625	6	116.565	13127.3	13127.3	4.50694
25.6	7	-36.8699	22046.8	22046.8	5.625	6	-21.8014	13724.3	13724.3	5.43283	7	-63.4349	13220.1	13220.1	5.56732	6	-53.1301	19401.6	19401.6	4.94694	1837	2871852	2871852	7	-59.0362	15564.4	15564.4	5.74698	6	-21.8014	13883.4	13883.4	5.38516	7	0	23785.8	23785.8	5.625	6	116.565	14051.5	14051.5	4.50694
25.8	7	-36.8699	21798.9	21798.9	5.625	6	-21.8014	14316.7	14316.7	5.43283	7	-63.4349	15230	15230	5.56732	6	-53.1301	17231	17231	4.94694	1837	2.79029e+06	2.79029e+06	7	-59.0362	15284.9	15284.9	5.74698	6	-21.8014	12753.5	12753.5	5.38516	7	0	21182.1	21182.1	5.625	6	116.565	14364.2	14364.2	4.50694
26	7	-36.8699	23533.1	23533.1	5.625	6	-21.8014	15353.3	15353.3	5.43283	7	-63.4349	17729.7	17729.7	5.56732	6	-53.1301	16008.1	16008.1	4.94694	1837	2.8127e+06	2.8127e+06	7	-59.0362	17188.3	17188.3	5.74698	6	-21.8014	11864.5	11864.5	5.38516	7	0	23823.3	23823.3	5.625	6	116.565	15403.2	15403.2	4.50694
26.2	7	-36.8699	23435.5	23435.5	5.625	6	-21.8014	13103.5	13103.5	5.43283	7	-63.4349	12994	12994	5.56732	6	-53.1301	12746.5	12746.5	4.94694	1837	2875476	2875476	7	-59.0362	18028.6	18028.6	5.74698	6	-21.8014	13159.2	13159.2	5.38516	7	0	22999.3	22999.3	5.625	6	116.565	12388	12388	4.50694
26.4	7	-36.8699	21031.4	21031.4	5.625	6	-21.8014	15718.6	15718.6	5.43283	7	-63.4349	14238.8	14238.8	5.56732	6	-53.1301	15079.5	15079.5	4.94694	1837	2911518	2911518	7	-59.0362	19632.4	19632.4	5.74698	6	-21.8014	10607.7	10607.7	5.38516	7	0	20681.5	20681.5	5.625	6	116.565	14144.9	14144.9	4.50694
26.6	7	-36.8699	27833.4	27833.4	5.625	6	-21.8014	11384	11384	5.43283	7	-63.4349	12295.5	12295.5	5.56732	6	-53.1301	15120.5	15120.5	4.94694	1837	2.85896e+06	2.85896e+06	7	-59.0362	16291.9	16291.9	5.74698	6	-21.8014	11792.3	11792.3	5.38516	7	0	16285.5	16285.5	5.625	6	116.565	14397.5	14397.5	4.50694
26.8	7	-36.8699	27247	27247	5.625	6	-21.8014	16869.9	16869.9	5.43283	7	-63.4349	13075.8	13075.8	5.56732	6	-53.1301	18810.5	18810.5	4.94694	1837	2934459	2934459	7	-59.0362	19460.9	19460.9	5.74698	6	-21.8014	12064.8	12064.8	5.38516	7	0	19633.1	19633.1	5.625	6	116.565	13462.8	13462.8	4.50694
27	7	-36.8699	31375.1	31375.1	5.625	6	-21.8014	13589.3	13589.3	5.43283	7	-63.4349	16194.6	16194.6	5.56732	6	-53.1301	17240.2	17240.2	4.94694	1837	2.82881e+06	2.82881e+06	7	-59.0362	12992.7	12992.7	5.74698	6	-21.8014	11194.6	11194.6	5.38516	7	0	23992.9	23992.9	5.625	6	116.565	14022.7	14022.7	4.50694
27.2	7	-36.8699	20044.2	20044.2	5.625	6	-21.8014	23702.8	23702.8	5.43283	7	-63.4349	14133	14133	5.56732	6	-53.1301	20511.1	20511.1	4.94694	1837	2.74419e+06	2.74419e+06	7	-59.0362	16776.6	16776.6	5.74698	6	-21.8014	12517.8	12517.8	5.38516	7	0	22090.1	22090.1	5.625	6	116.565	11895.8	11895.8	4.50694
27.4	7	-36.8699	21515.3	21515.3	5.625	6	-21.8014	22132.4	22132.4	5.43283	7	-63.4349	14884.9	14884.9	5.56732	6	-53.1301	19007.7	19007.7	4.94694	1837	2.85206e+06	2.85206e+06	7	-59.0362	14204.9	14204.9	5.74698	6	-21.8014	15378.3	15378.3	5.38516	7	0	22414.4	22414.4	5.625	6	116.565	14070	14070	4.50694
27.6	7	-36.8699	20846.6	20846.6	5.625	6	-21.8014	23468.4	23468.4	5.43283	7	-63.4349	16428.9	16428.9	5.56732	6	-53.1301	15330	15330	4.94694	1837	2821752	2821752	7	-59.0362	20821.6	20821.6	5.74698	6	-21.8014	13359.9	13359.9	5.38516	7	0	23634.3	23634.3	5.625	6	116.565	12048.7	12048.7	4.50694
27.8	7	-36.8699	22633.1	22633.1	5.625	6	-21.8014	19828.4	19828.4	5.43283	7	-63.4349	18235.4	18235.4	5.56732	6	-53.1301	16854.2	16854.2	4.94694	1837	2881587	2881587	7	-59.0362	17919	17919	5.74698	6	-21.8014	13187.7	13187.7	5.38516	7	0	22499.6	22499.6	5.625	6	116.565	12909	12909	4.50694
28	7	-36.8699	20459.2	20459.2	5.625	6	-21.8014	18858.1	18858.1	5.43283	7	-63.4349	16171.5	16171.5	5.56732	6	-53.1301	18433.1	18433.1	4.94694	1837	2.84144e+06	2.84144e+06	7	-59.0362	17013.2	17013.2	5.74698	6	-21.8014	11642.4	11642.4	5.38516	7	0	26493.2	26493.2	5.625	6	116.565	14926.8	14926.8	4.50694
28.2	7	-36.8699	28497.2	28497.2	5.625	6	-21.8014	13757.9	13757.9	5.43283	7	-63.4349	19388.1	19388.1	5.56732	6	-53.1301	15833.2	15833.2	4.94694	1837	2.84476e+06	2.84476e+06	7	-59.0362	17356.8	17356.8	5.74698	6	-21.8014	12031.3	12031.3	5.38516	7	0	19393.2	19393.2	5.625	6	116.565	11356.4	11356.4	4.50694
28.4	7	-36.8699	25062.6	25062.6	5.625	6	-21.8014	13465.8	13465.8	5.43283	7	-63.4349	16723.6	16723.6	5.56732	6	-53.1301	14532.4	14532.4	4.94694	1837	2.84018e+06	2.84018e+06	7	-59.0362	17494.5	17494.5	5.74698	6	-21.8014	10137.2	10137.2	5.38516	7	0	18474.9	18474.9	5.625	6	116.565	13589.4	13589.4	4.50694
28.6	7	-36.8699	27429.4	27429.4	5.625	6	-21.8014	21614	21614	5.43283	7	-63.4349	17477.3	17477.3	5.56732	6	-53.1301	16156.1	16156.1	4.94694	1837	2812650	2812650	7	-59.0362	15077.6	15077.6	5.74698	6	-21.8014	12051.7	12051.7	5.38516	7	0	22214.7	22214.7	5.625	6	116.565	15082.4	15082.4	4.50694
28.8	7	-36.8699	25080.3	25080.3	5.625	6	-21.8014	15168.5	15168.5	5.43283	7	-63.4349	14698.9	14698.9	5.56732	6	-53.1301	17745.8	17745.8	4.94694	1837	2.8536e+06	2.8536e+06	7	-59.0362	13774.5	13774.5	5.74698	6	-21.8014	15022.8	15022.8	5.38516	7	0	17664.9	17664.9	5.625	6	116.565	15285.1	15285.1	4.50694
29	7	-36.8699	19944.8	19944.8	5.625	6	-21.8014	12567.6	12567.6	5.43283	7	-63.4349	15220.4	15220.4	5.56732	6	-53.1301	15619.8	15619.8	4.94694	1837	2835205	2835205	7	-59.0362	13323.1	13323.1	5.74698	6	-21.8014	12800.7	12800.7	5.38516	7	0	17152.9	17152.9	5.625	6	116.565	14017.6	14017.6	4.50694
29.2	7	-36.8699	29870.4	29870.4	5.625	6	-21.8014	19893.8	19893.8	5.43283	7	-63.4349	15197.2	15197.2	5.56732	6	-53.1301	17993.6	17993.6	4.94694	1837	2.91857e+06	2.91857e+06	7	-59.0362	15172.2	15172.2	5.74698	6	-21.8014	14098.1	14098.1	5.38516	7	0	17447.7	17447.7	5.625	6	116.565	10831.5	10831.5	4.50694
29.4	7	-36.8699	28531.3	28531.3	5.625	6	-21.8014	17336.4	17336.4	5.43283	7	-63.4349	15657.9	15657.9	5.56732	6	-53.1301	15866.1	15866.1	4.94694	1837	2892481	2892481	7	-59.0362	16167.9	16167.9	5.74698	6	-21.8014	13540.8	13540.8	5.38516	7	0	15836.9	15836.9	5.625	6	116.565	13371.8	13371.8	4.50694
29.6	7	-36.8699	26830	26830	5.625	6	-21.8014	14649.5	14649.5	5.43283	7	-63.4349	15097.2	15097.2	5.56732	6	-53.1301	22278.3	22278.3	4.94694	1837	2.85725e+06	2.85725e+06	7	-59.0362	14488.1	14488.1	5.74698	6	-21.8014	11417.8	11417.8	5.38516	7	0	26606.6	26606.6	5.625	6	116.565	13788.2	13788.2	4.50694
29.8	7	-36.8699	26403.7	26403.7	5.625	6	-21.8014	12500	12500	5.43283	7	-63.4349	18748.4	18748.4	5.56732	6	-53.1301	14568.9	14568.9	4.94694	1837	2.89089e+06	2.89089e+06	7	-59.0362	16075.5	16075.5	5.74698	6	-21.8014	13702.6	13702.6	5.38516	7	0	15832.5	15832.5	5.625	6	116.565	13674.4	13674.4	4.50694
30	7	-36.8699	27650.9	27650.9	5.625	6	-21.8014	18523.6	18523.6	5.43283	7	-63.4349	23154.5	23154.5	5.56732	6	-53.1301	18414.6	18414.6	4.94694	1837	2.78632e+06	2.78632e+06	7	-59.0362	12199.6	12199.6	5.74698	6	-21.8014	10395.3	10395.3	5.38516	7	0	18010.3	18010.3	5.625	6	116.565	17359.6	17359.6	4.50694
		Background value of each axon
Time (s)	Axon1	Axon2	Axon3	Axon4	Axon6	Axon7	Axon8	Axon9
0	11707.6	10035.1	11707.6	10035.1	11707.6	10035.1	11707.6	10035.1
0.2	10056.3	8619.7	10056.3	8619.7	10056.3	8619.7	10056.3	8619.7
0.4	10197.4	8740.62	10197.4	8740.62	10197.4	8740.62	10197.4	8740.62
0.6	10106.8	8662.98	10106.8	8662.98	10106.8	8662.98	10106.8	8662.98
0.8	10158.4	8707.21	10158.4	8707.21	10158.4	8707.21	10158.4	8707.21
1	10091	8649.47	10091	8649.47	10091	8649.47	10091	8649.47
1.2	10109.9	8665.6	10109.9	8665.6	10109.9	8665.6	10109.9	8665.6
1.4	10454.4	8960.89	10454.4	8960.89	10454.4	8960.89	10454.4	8960.89
1.6	10392.4	8907.76	10392.4	8907.76	10392.4	8907.76	10392.4	8907.76
1.8	9824.5	8421	9824.5	8421	9824.5	8421	9824.5	8421
2	10158.1	8706.96	10158.1	8706.96	10158.1	8706.96	10158.1	8706.96
2.2	10185.4	8730.37	10185.4	8730.37	10185.4	8730.37	10185.4	8730.37
2.4	10218.7	8758.9	10218.7	8758.9	10218.7	8758.9	10218.7	8758.9
2.6	10284	8814.82	10284	8814.82	10284	8814.82	10284	8814.82
2.8	9968.73	8544.63	9968.73	8544.63	9968.73	8544.63	9968.73	8544.63
3	10186.1	8730.97	10186.1	8730.97	10186.1	8730.97	10186.1	8730.97
3.2	10088.2	8647.04	10088.2	8647.04	10088.2	8647.04	10088.2	8647.04
3.4	10148	8698.28	10148	8698.28	10148	8698.28	10148	8698.28
3.6	10432.7	8942.33	10432.7	8942.33	10432.7	8942.33	10432.7	8942.33
3.8	10116	8670.86	10116	8670.86	10116	8670.86	10116	8670.86
4	10096.4	8654.09	10096.4	8654.09	10096.4	8654.09	10096.4	8654.09
4.2	10204.4	8746.62	10204.4	8746.62	10204.4	8746.62	10204.4	8746.62
4.4	10294.2	8823.6	10294.2	8823.6	10294.2	8823.6	10294.2	8823.6
4.6	10394.6	8909.62	10394.6	8909.62	10394.6	8909.62	10394.6	8909.62
4.8	10001.9	8573.08	10001.9	8573.08	10001.9	8573.08	10001.9	8573.08
5	10335	8858.55	10335	8858.55	10335	8858.55	10335	8858.55
5.2	10026.7	8594.3	10026.7	8594.3	10026.7	8594.3	10026.7	8594.3
5.4	10549.4	9042.36	10549.4	9042.36	10549.4	9042.36	10549.4	9042.36
5.6	10229.4	8768.04	10229.4	8768.04	10229.4	8768.04	10229.4	8768.04
5.8	10214	8754.89	10214	8754.89	10214	8754.89	10214	8754.89
6	9994.83	8567	9994.83	8567	9994.83	8567	9994.83	8567
6.2	10074.2	8635.02	10074.2	8635.02	10074.2	8635.02	10074.2	8635.02
6.4	10199.2	8742.15	10199.2	8742.15	10199.2	8742.15	10199.2	8742.15
6.6	10419.4	8930.95	10419.4	8930.95	10419.4	8930.95	10419.4	8930.95
6.8	10301	8829.45	10301	8829.45	10301	8829.45	10301	8829.45
7	10177.8	8723.86	10177.8	8723.86	10177.8	8723.86	10177.8	8723.86
7.2	10394.9	8909.94	10394.9	8909.94	10394.9	8909.94	10394.9	8909.94
7.4	10183.1	8728.4	10183.1	8728.4	10183.1	8728.4	10183.1	8728.4
7.6	10220.7	8760.59	10220.7	8760.59	10220.7	8760.59	10220.7	8760.59
7.8	10314	8840.56	10314	8840.56	10314	8840.56	10314	8840.56
8	10538.3	9032.81	10538.3	9032.81	10538.3	9032.81	10538.3	9032.81
8.2	9957.25	8534.78	9957.25	8534.78	9957.25	8534.78	9957.25	8534.78
8.4	10344.6	8866.76	10344.6	8866.76	10344.6	8866.76	10344.6	8866.76
8.6	10291.5	8821.31	10291.5	8821.31	10291.5	8821.31	10291.5	8821.31
8.8	10342.6	8865.08	10342.6	8865.08	10342.6	8865.08	10342.6	8865.08
9	10180.6	8726.24	10180.6	8726.24	10180.6	8726.24	10180.6	8726.24
9.2	9972.8	8548.11	9972.8	8548.11	9972.8	8548.11	9972.8	8548.11
9.4	10000.4	8571.76	10000.4	8571.76	10000.4	8571.76	10000.4	8571.76
9.6	10198.9	8741.88	10198.9	8741.88	10198.9	8741.88	10198.9	8741.88
9.8	10236.9	8774.48	10236.9	8774.48	10236.9	8774.48	10236.9	8774.48
10	10133.4	8685.81	10133.4	8685.81	10133.4	8685.81	10133.4	8685.81
10.2	10782.9	9242.46	10782.9	9242.46	10782.9	9242.46	10782.9	9242.46
10.4	10047	8611.74	10047	8611.74	10047	8611.74	10047	8611.74
10.6	10264.9	8798.51	10264.9	8798.51	10264.9	8798.51	10264.9	8798.51
10.8	10103.5	8660.11	10103.5	8660.11	10103.5	8660.11	10103.5	8660.11
11	10315.9	8842.22	10315.9	8842.22	10315.9	8842.22	10315.9	8842.22
11.2	10503.1	9002.62	10503.1	9002.62	10503.1	9002.62	10503.1	9002.62
11.4	10214.4	8755.22	10214.4	8755.22	10214.4	8755.22	10214.4	8755.22
11.6	10504.2	9003.62	10504.2	9003.62	10504.2	9003.62	10504.2	9003.62
11.8	10322.1	8847.53	10322.1	8847.53	10322.1	8847.53	10322.1	8847.53
12	10259.9	8794.23	10259.9	8794.23	10259.9	8794.23	10259.9	8794.23
12.2	10123.5	8677.26	10123.5	8677.26	10123.5	8677.26	10123.5	8677.26
12.4	10392.8	8908.15	10392.8	8908.15	10392.8	8908.15	10392.8	8908.15
12.6	10291.2	8821	10291.2	8821	10291.2	8821	10291.2	8821
12.8	10486.7	8988.63	10486.7	8988.63	10486.7	8988.63	10486.7	8988.63
13	10278.9	8810.48	10278.9	8810.48	10278.9	8810.48	10278.9	8810.48
13.2	10494.5	8995.3	10494.5	8995.3	10494.5	8995.3	10494.5	8995.3
13.4	10436.5	8945.55	10436.5	8945.55	10436.5	8945.55	10436.5	8945.55
13.6	10608.1	9092.63	10608.1	9092.63	10608.1	9092.63	10608.1	9092.63
13.8	10532.3	9027.7	10532.3	9027.7	10532.3	9027.7	10532.3	9027.7
14	10401.7	8915.78	10401.7	8915.78	10401.7	8915.78	10401.7	8915.78
14.2	10533.3	9028.52	10533.3	9028.52	10533.3	9028.52	10533.3	9028.52
14.4	10430.1	8940.07	10430.1	8940.07	10430.1	8940.07	10430.1	8940.07
14.6	10565.5	9056.13	10565.5	9056.13	10565.5	9056.13	10565.5	9056.13
14.8	10360.4	8880.37	10360.4	8880.37	10360.4	8880.37	10360.4	8880.37
15	10392.2	8907.64	10392.2	8907.64	10392.2	8907.64	10392.2	8907.64
15.2	10494.5	8995.29	10494.5	8995.29	10494.5	8995.29	10494.5	8995.29
15.4	10393.6	8908.84	10393.6	8908.84	10393.6	8908.84	10393.6	8908.84
15.6	10185.6	8730.51	10185.6	8730.51	10185.6	8730.51	10185.6	8730.51
15.8	10465	8970.02	10465	8970.02	10465	8970.02	10465	8970.02
16	10512.2	9010.48	10512.2	9010.48	10512.2	9010.48	10512.2	9010.48
16.2	10576.1	9065.21	10576.1	9065.21	10576.1	9065.21	10576.1	9065.21
16.4	10509	9007.68	10509	9007.68	10509	9007.68	10509	9007.68
16.6	10695.2	9167.32	10695.2	9167.32	10695.2	9167.32	10695.2	9167.32
16.8	10464.9	8969.9	10464.9	8969.9	10464.9	8969.9	10464.9	8969.9
17	10861.3	9309.7	10861.3	9309.7	10861.3	9309.7	10861.3	9309.7
17.2	10637.1	9117.48	10637.1	9117.48	10637.1	9117.48	10637.1	9117.48
17.4	10723	9191.17	10723	9191.17	10723	9191.17	10723	9191.17
17.6	10366.8	8885.87	10366.8	8885.87	10366.8	8885.87	10366.8	8885.87
17.8	10310.5	8837.58	10310.5	8837.58	10310.5	8837.58	10310.5	8837.58
18	10080.6	8640.52	10080.6	8640.52	10080.6	8640.52	10080.6	8640.52
18.2	10492.4	8993.46	10492.4	8993.46	10492.4	8993.46	10492.4	8993.46
18.4	10687.3	9160.58	10687.3	9160.58	10687.3	9160.58	10687.3	9160.58
18.6	10600.9	9086.49	10600.9	9086.49	10600.9	9086.49	10600.9	9086.49
18.8	10627.4	9109.23	10627.4	9109.23	10627.4	9109.23	10627.4	9109.23
19	10494	8994.86	10494	8994.86	10494	8994.86	10494	8994.86
19.2	10528.8	9024.73	10528.8	9024.73	10528.8	9024.73	10528.8	9024.73
19.4	10529.6	9025.39	10529.6	9025.39	10529.6	9025.39	10529.6	9025.39
19.6	10193.7	8737.43	10193.7	8737.43	10193.7	8737.43	10193.7	8737.43
19.8	10309.6	8836.8	10309.6	8836.8	10309.6	8836.8	10309.6	8836.8
20	10667.7	9143.76	10667.7	9143.76	10667.7	9143.76	10667.7	9143.76
20.2	10446.2	8953.87	10446.2	8953.87	10446.2	8953.87	10446.2	8953.87
20.4	10525.9	9022.23	10525.9	9022.23	10525.9	9022.23	10525.9	9022.23
20.6	10747.6	9212.23	10747.6	9212.23	10747.6	9212.23	10747.6	9212.23
20.8	10318.2	8844.19	10318.2	8844.19	10318.2	8844.19	10318.2	8844.19
21	10649.4	9128.05	10649.4	9128.05	10649.4	9128.05	10649.4	9128.05
21.2	10580.1	9068.69	10580.1	9068.69	10580.1	9068.69	10580.1	9068.69
21.4	10878.9	9324.75	10878.9	9324.75	10878.9	9324.75	10878.9	9324.75
21.6	10407.5	8920.74	10407.5	8920.74	10407.5	8920.74	10407.5	8920.74
21.8	10598.6	9084.53	10598.6	9084.53	10598.6	9084.53	10598.6	9084.53
22	10791.3	9249.67	10791.3	9249.67	10791.3	9249.67	10791.3	9249.67
22.2	10756.2	9219.59	10756.2	9219.59	10756.2	9219.59	10756.2	9219.59
22.4	10764.3	9226.58	10764.3	9226.58	10764.3	9226.58	10764.3	9226.58
22.6	10649.6	9128.2	10649.6	9128.2	10649.6	9128.2	10649.6	9128.2
22.8	10710	9180.04	10710	9180.04	10710	9180.04	10710	9180.04
23	10522.8	9019.52	10522.8	9019.52	10522.8	9019.52	10522.8	9019.52
23.2	10740.2	9205.88	10740.2	9205.88	10740.2	9205.88	10740.2	9205.88
23.4	10563.2	9054.2	10563.2	9054.2	10563.2	9054.2	10563.2	9054.2
23.6	10774.4	9235.23	10774.4	9235.23	10774.4	9235.23	10774.4	9235.23
23.8	10812.9	9268.24	10812.9	9268.24	10812.9	9268.24	10812.9	9268.24
24	10747.5	9212.12	10747.5	9212.12	10747.5	9212.12	10747.5	9212.12
24.2	10846.6	9297.12	10846.6	9297.12	10846.6	9297.12	10846.6	9297.12
24.4	10731.4	9198.36	10731.4	9198.36	10731.4	9198.36	10731.4	9198.36
24.6	10739.8	9205.58	10739.8	9205.58	10739.8	9205.58	10739.8	9205.58
24.8	10396.6	8911.35	10396.6	8911.35	10396.6	8911.35	10396.6	8911.35
25	10293.3	8822.87	10293.3	8822.87	10293.3	8822.87	10293.3	8822.87
25.2	10730.8	9197.86	10730.8	9197.86	10730.8	9197.86	10730.8	9197.86
25.4	10649.7	9128.36	10649.7	9128.36	10649.7	9128.36	10649.7	9128.36
25.6	10943.4	9380.03	10943.4	9380.03	10943.4	9380.03	10943.4	9380.03
25.8	10632.6	9113.62	10632.6	9113.62	10632.6	9113.62	10632.6	9113.62
26	10718	9186.82	10718	9186.82	10718	9186.82	10718	9186.82
26.2	10957.2	9391.86	10957.2	9391.86	10957.2	9391.86	10957.2	9391.86
26.4	11094.5	9509.59	11094.5	9509.59	11094.5	9509.59	11094.5	9509.59
26.6	10894.3	9337.93	10894.3	9337.93	10894.3	9337.93	10894.3	9337.93
26.8	11181.9	9584.51	11181.9	9584.51	11181.9	9584.51	11181.9	9584.51
27	10779.3	9239.44	10779.3	9239.44	10779.3	9239.44	10779.3	9239.44
27.2	10456.9	8963.07	10456.9	8963.07	10456.9	8963.07	10456.9	8963.07
27.4	10868	9315.39	10868	9315.39	10868	9315.39	10868	9315.39
27.6	10752.5	9216.39	10752.5	9216.39	10752.5	9216.39	10752.5	9216.39
27.8	10980.5	9411.82	10980.5	9411.82	10980.5	9411.82	10980.5	9411.82
28	10827.5	9280.7	10827.5	9280.7	10827.5	9280.7	10827.5	9280.7
28.2	10840.1	9291.53	10840.1	9291.53	10840.1	9291.53	10840.1	9291.53
28.4	10822.7	9276.58	10822.7	9276.58	10822.7	9276.58	10822.7	9276.58
28.6	10717.8	9186.66	10717.8	9186.66	10717.8	9186.66	10717.8	9186.66
28.8	10873.8	9320.41	10873.8	9320.41	10873.8	9320.41	10873.8	9320.41
29	10803.7	9260.33	10803.7	9260.33	10803.7	9260.33	10803.7	9260.33
29.2	11121.4	9532.61	11121.4	9532.61	11121.4	9532.61	11121.4	9532.61
29.4	11022	9447.41	11022	9447.41	11022	9447.41	11022	9447.41
29.6	10887.7	9332.35	10887.7	9332.35	10887.7	9332.35	10887.7	9332.35
29.8	11015.9	9442.22	11015.9	9442.22	11015.9	9442.22	11015.9	9442.22
30	10617.4	9100.66	10617.4	9100.66	10617.4	9100.66	10617.4	9100.66
		Background Corrected Data
Time (s)	Axon1	Axon2	Axon3	Axon4	Axon6	Axon7	Axon8	Axon9
0	3217.3	4335.35	7968.53	5323.03	5461.41	3190.53	2593.09	6092.65
0.2	4879.22	5948.23	4285.23	15014.9	6485.29	3310.34	10749.5	6350.33
0.4	2038.13	4377.4	7263.42	6912.16	5687.15	4667.95	14516.9	6480.74
0.6	6774.73	8170.49	4267.54	5191.73	5051.41	6143.98	10859.2	3076.92
0.8	4072.8	9653.33	5759.33	7978.52	4794.6	4728.31	9872.05	4499.92
1	8333.76	4920.56	5609.63	9572.86	7084.71	7456.03	12334.9	7160.18
1.2	7283.55	9045.81	4846.61	10560.6	6248.25	7463.42	8867.82	6783.46
1.4	6087.14	7286.77	7565.26	7886.78	6209.5	9128.53	12945.6	5738.62
1.6	6193.61	7051.65	10744	10914.2	6010.23	3851.67	11672.6	4867.62
1.8	4812.92	5205.22	7934.25	5455.72	3919.72	6400.12	12571.6	7660.43
2	4630.45	6413.59	8652.64	5625.28	7401.64	9482.02	13343.7	8561.26
2.2	6982.25	5935.32	4144.82	4959.63	5302.02	9117.33	5625.95	2851.65
2.4	5216.52	4213.25	6001.65	5502.49	6000.4	9972.79	12319.2	2837.13
2.6	5373.02	4400.51	7882.84	4464.03	2992.37	5391.14	9719.63	8692.75
2.8	6089.71	4466.46	9628.11	1282.51	767.412	9206.06	11456.1	6969.51
3	3887.28	9159.88	10380.2	4402.91	749.288	6590.76	14183	9532.94
3.2	2325.88	5044.22	6537.84	4468.22	2901.92	4611.78	12664.2	7808.15
3.4	4026.95	5398.08	9646.58	4298.8	3611.35	7101.56	8908.07	7126.35
3.6	6161.88	6248.63	5717.7	2421.27	3998.19	3367.43	14848.2	9693.67
3.8	6862.34	4588.51	8667.2	5294.91	2062.67	7545.82	11679.2	5677.86
4	5108.81	655.486	9699.67	4600.93	3424.35	5488.13	18327.6	6787.89
4.2	7225.66	4290.98	8064.46	3341.75	3658.16	6644.35	14264.1	7381.14
4.4	5891.71	4568.31	5494.49	5054.23	3429.53	13611.7	18417.4	9031.26
4.6	8147	6774.46	9421.58	6019.04	5647.42	10462.9	10536	4785.91
4.8	7235.99	3251.68	8800.61	4311.12	6442.64	13231	8944.55	3545.16
5	10132.1	2208.36	8810.29	4255.46	3630.37	12497.2	6497.41	4748.81
5.2	12543.9	3974.84	7462.41	5617.46	4678.77	5863.53	6353.43	6728.18
5.4	9787.62	5195.82	6589.59	6631.67	3626.36	4938.37	9407.92	6557.78
5.6	8805.61	5467.41	6916.9	3357.63	4297.8	10891.1	6963.49	4424.73
5.8	8936.18	7564.22	5641.32	4743.47	3631.67	7791.68	7340.26	5892.08
6	7694.55	4263.1	9921.95	5844.12	6843.46	4730.02	13409.7	6710.39
6.2	5867.24	5497.83	6865.89	4000.86	2290.07	5859.57	4744.28	3485.3
6.4	12137	2992.27	10363.4	4713.59	7881.3	6498.17	3944.32	6210.08
6.6	7303.72	889.831	16083.2	5840.84	2767.71	8300.19	6475.28	6720.13
6.8	12379	2947.51	12164.1	4525.77	6570.24	3747.33	8840.11	5935.16
7	9875.66	1254.06	13499.7	2156.95	3667.36	6287.79	8186.7	8128.31
7.2	9685.5	6946.3	14473.4	6031.08	6437.71	4489.17	6216.19	7605.01
7.4	7939.27	5398.21	15160.5	1931.87	4509.58	7036.41	8057.15	6576.51
7.6	12917	3851.73	15844.8	5580.94	9918.15	6236.94	8415.72	8347.59
7.8	9873.18	6341.04	17052.1	3379.1	4302.92	7399.66	5209.56	5589.33
8	9288.22	7025.9	14142.3	6236.39	6711.84	10015.8	68.4203	4713.86
8.2	12759.6	5295.17	12500.9	6953.47	11750.1	10345.6	3812.68	4294.38
8.4	14062.2	4159.87	11030.1	5094.67	8108.3	14072.3	7874.41	3619
8.6	14393.8	8006.03	7350.04	5517.16	10715.4	11365.1	8365.1	3599.97
8.8	10801.8	2463.52	11369.8	7179.45	7750.15	9361.11	11552.5	5104.17
9	10832.8	5945.35	13481.7	5927.07	6232.31	4843.74	9375.19	6647.29
9.2	14807.1	3687.27	8717.2	5549.09	6187.36	5908.45	14119.3	4079.54
9.4	15001.9	6054.87	10934.2	5980.67	4532.85	4100.22	17577.5	5651.02
9.6	12622.8	2932.34	14729.7	9313.69	4182.52	4948.25	15185.8	3636.07
9.8	7811.4	7843.74	6324.66	5197.91	6807.39	6559.8	13515.9	9182.45
10	8812.43	8000.86	13981.2	5877.02	5223.75	5879.64	6246.51	5375.33
10.2	10791	875.291	11681.3	2784	9432.21	8132.73	10311.4	6445.17
10.4	7706.64	3633.61	8123.27	5182.5	5110.72	5233.8	9753.77	5201
10.6	11361.3	5810.16	13362.1	4928.66	3950.46	5578.2	13320.1	3611.56
10.8	11420.1	4562.47	15683.6	4398.25	1728	4103.31	8403.95	7750.82
11	9745.91	5971.28	9895.47	4112.29	2848.59	7353.85	5006.04	3925.64
11.2	5706.9	4307.08	7048.31	4185.44	6129.88	4087.34	10864.7	6303.81
11.4	8902.81	4212.51	8954.94	3529.71	2193.46	6876.96	2768.04	7539.68
11.6	9970.26	4099.52	8608.76	5985.79	5039.24	4281.26	4392.73	6143.46
11.8	5694.78	2290.65	12025.8	5808.96	4815.08	6085.18	606.539	7003.49
12	7743.45	4036.2	9808.62	5127.13	7433.08	2934.52	2925.26	8307.38
12.2	12873	6276.72	9126.69	5166.63	4480.61	2058.75	4864.87	3016.99
12.4	7827.69	4502.96	8088.07	3017	5158.77	7243.89	3289.33	5878.98
12.6	11702.3	1339.59	8504.08	2328.77	5105.84	3894.04	6127.31	3864.1
12.8	10994.7	8508.72	6982.39	7470.2	5590.8	2831.46	4303.91	3746.49
13	10497.7	5369.85	8174.05	7403.44	3010.47	3779.46	2491.35	6707.54
13.2	12033.4	3335.26	7457.74	5262.02	4258.67	6987.46	5325.43	6248.81
13.4	9750.7	5916.57	10657.6	4185.28	4271.7	4472.8	7858.95	8832.01
13.6	16335.6	7501.65	8905.77	5182.82	2010.95	6098.61	10481.4	7054.68
13.8	10036.8	5671.22	10112.5	5411.77	3933.24	2822.66	18101.3	5506.52
14	15068.6	9256.02	8677.25	6212.57	4152.97	1045	13889.8	6112
14.2	16664.6	7544.22	8588.62	5500.79	3999.86	5973.52	16534.5	5473.35
14.4	15792.6	6403.34	10265.2	4446.99	3443.39	1790.88	18218.5	6633.96
14.6	12197.1	2985.23	8568.47	6320.54	4084.84	5606.21	14004.1	1918.68
14.8	13707.7	6444.63	11591.3	2775.33	6260.96	2304.61	17443.2	5846.75
15	14617.1	5396.43	6331.97	2221.76	3777.75	1213.29	10256.9	4633.03
15.2	8422.65	3595.29	7606.8	4977.41	4446.73	4594.21	14194.3	6188.15
15.4	11652	4494.59	6226.18	1786.81	7602.34	4832.54	19478	6402.81
15.6	6223.79	5026.09	7657.8	8529.74	7862.46	5855.98	10193.5	9429.17
15.8	7513.65	2732.87	9879.75	4103.75	9364.35	3049.67	13824.8	3263.13
16	10858.6	6579.06	9110.04	4157.35	10007	5115.57	12922	4057.11
16.2	12080.2	6176.79	13338.9	3919.02	11701.3	2145.16	12401.7	8084.56
16.4	12127.3	3804.58	8778.46	7025.97	13002.5	1981.56	14673.6	3719.9
16.6	11583.6	4087.13	11409.9	7366.75	11390.5	3476.59	12257.8	4721.13
16.8	7584.8	5608.93	7692.24	5566.85	9285.87	6301.33	15478.8	3607.98
17	10264.8	3739.89	8996.24	7267.11	9149.4	1796	14295.8	3263.53
17.2	7601.06	6353.8	10372.1	6556.2	12124	5151.4	20177	4609.84
17.4	14840.5	7640.48	8173.27	3855.47	9114.82	4597.98	14835.9	806.879
17.6	8566.28	5343.76	5502.27	7874.04	10682.2	4858.68	12963.1	5787.73
17.8	8346.3	3720	11411	7189.84	11478.8	3554.62	14708.6	4347.59
18	6699.55	1969.89	12797.7	3451.86	11489.6	5330.7	14973.6	5110.75
18.2	11796.7	6809.87	5521.63	7469.29	7221.28	3529.34	11189.1	4003.19
18.4	13101.7	6848.41	10054.9	5552.77	14671.6	4079.31	12163.1	7824.78
18.6	10151.8	7090.2	7628.12	5832.66	9906.31	1484.04	18077.5	7220.4
18.8	9266.08	6961.74	3377.24	2143.42	10447.8	4742.27	14101.8	2997.71
19	12318.3	7280.44	7215.99	5416.49	7663.97	9805.89	12957.1	2042.64
19.2	11843.8	6534.79	7632.78	4595.38	6968.66	6133.4	15124.5	6317.81
19.4	18810.5	7070.82	5932.47	9156.75	8377.22	5817.44	17926.3	4011.04
19.6	14545.8	4458.37	4393.82	8434.16	6078.09	6433.88	10940.6	4718.76
19.8	15101.3	9906.2	9670.13	3928.09	8692.63	6201.95	12605.3	5668.28
20	21195.2	13466.8	5625.23	10974.5	5496.45	5542.45	7658.69	6130.13
20.2	17900	12248.4	4708.03	5474.21	1599.9	2719.04	10861.4	3259.87
20.4	18419.4	13125.4	7109.3	2226.16	4717.75	3282.36	6817.4	3768.35
20.6	24575.2	10288	5047.46	5342.46	2250.42	11633.6	10139.9	4623.8
20.8	20174.9	11488.7	9337.21	6358.64	4762.73	13257	8057.45	6288.35
21	17487.4	10174.6	3211.55	6975.48	5916.86	6655.92	4862.87	10298.8
21.2	19044.6	14216.6	4806.76	6141.73	3658.79	7794.38	5137.66	3809.72
21.4	13032.1	10211.2	4694.01	4035.28	6162.28	8512.96	6837.18	2217.42
21.6	20422.1	7007.82	3315.06	4926.14	5785.71	8215.43	3117.07	4558.05
21.8	21629.8	14818.2	6355.14	5031.89	6102.02	5724.62	6959.75	3805.84
22	17706	11555	5566.07	5398.18	2806.74	3670.5	5309.27	5019.99
22.2	16494.7	9440.43	6599.81	8142.04	5750.67	7506.46	2635.53	6210.85
22.4	21923.7	6688.74	12035.8	6692.55	5930.12	7406.8	5609.42	3885.84
22.6	21071.7	6348.93	12993.5	4732.7	7174.77	4479.63	6379.88	4073.48
22.8	16013.2	8358.69	12210.9	4771.88	3091.91	5529.1	2441.04	5906.72
23	18729.1	8804.85	9274.72	8777.9	5610.78	2922.15	7936.84	3194.24
23.2	16476.1	7557.63	5612.13	6723.96	4667	6329.31	5027.67	5115.2
23.4	14329.1	4697.53	5908.53	6998.67	1849.99	3825.59	8679.48	6459.25
23.6	17532.3	4058.45	3163.91	4510.62	6129.61	2995.22	11348.8	3143.43
23.8	16069.3	1171.89	5960.77	6381.53	4528.54	5665.89	8906.82	5940.28
24	11259.2	5360.38	11741.8	4325.73	22.7302	4491.45	8594.46	3781.3
24.2	20515	3254.11	4559.07	4548.41	2304.78	7115.82	10330.5	1900.4
24.4	18523.2	5922.45	2027.12	7490.47	5096.86	4042.43	7705.27	6184.34
24.6	17670.2	8241.09	1886.99	6868.76	1966.79	6127.66	6743.2	2062.82
24.8	16701.6	7028.77	4859.57	7363.7	4163.92	5649.22	7755.57	2433.06
25	16753.1	1727.83	8404.73	7511.71	4893.71	5438.77	12080.4	4249.64
25.2	16257.8	3505.57	5954.9	4416.16	7457.7	1882.37	8694.02	6054.85
25.4	15439.1	5020.33	7944.62	7432.76	3564.17	5711.47	9723.45	3998.97
25.6	11103.4	4344.28	2276.7	10021.6	4621.04	4503.38	12842.4	4671.47
25.8	11166.3	5203.13	4597.49	8117.42	4652.31	3639.88	10549.6	5250.61
26	12815.1	6166.51	7011.74	6821.26	6470.3	2677.63	13105.3	6216.38
26.2	12478.3	3711.68	2036.86	3354.63	7071.45	3767.35	12042.1	2996.12
26.4	9936.86	6209.03	3144.26	5569.9	8537.86	1098.07	9586.95	4635.33
26.6	16939.2	2046.08	1401.25	5782.54	5397.64	2454.39	5391.25	5059.62
26.8	16065.1	7285.42	1893.88	9225.97	8278.97	2480.3	8451.19	3878.31
27	20595.7	4349.84	5415.26	8000.76	2213.36	1955.14	13213.6	4783.3
27.2	9587.32	14739.8	3676.09	11548.1	6319.65	3554.76	11633.1	2932.74
27.4	10647.4	12817	4016.93	9692.34	3336.91	6062.96	11546.5	4754.61
27.6	10094.1	14252	5676.44	6113.6	10069.1	4143.56	12881.9	2832.33
27.8	11652.6	10416.6	7254.94	7442.39	6938.56	3775.92	11519.1	3497.13
28	9631.73	9577.38	5344.05	9152.44	6185.74	2361.68	15665.7	5646.12
28.2	17657.1	4466.41	8547.97	6541.66	6516.72	2739.78	8553.13	2064.83
28.4	14239.9	4189.24	5900.97	5255.86	6671.85	860.607	7652.19	4312.77
28.6	16711.7	12427.3	6759.56	6969.49	4359.85	2865.07	11496.9	5895.73
28.8	14206.5	5848.1	3825.14	8425.41	2900.7	5702.42	6791.06	5964.67
29	9141.07	3307.23	4416.73	6359.46	2519.39	3540.41	6349.16	4757.26
29.2	18749.1	10361.2	4075.81	8460.95	4050.87	4565.46	6326.28	1298.9
29.4	17509.3	7888.95	4635.91	6418.66	5145.95	4093.38	4814.88	3924.42
29.6	15942.3	5317.19	4209.5	12945.9	3600.37	2085.43	15718.9	4455.8
29.8	15387.7	3057.81	7732.5	5126.72	5059.58	4260.38	4816.62	4232.19
30	17033.5	9422.92	12537.1	9313.89	1582.12	1294.65	7392.86	8258.96
		Normalized Data
Time (s)	Axon1	Axon2	Axon3	Axon4	Axon6	Axon7	Axon8	Axon9
0	0.824953	3.06638	3.27148	2.50203	3.80855	2.21257	1.13059	3.11199
0.2	1.25109	4.20717	1.7593	7.05759	4.52257	2.29565	4.68681	3.24362
0.4	0.522601	3.09613	2.982	3.24898	3.96598	3.23713	6.32938	3.31023
0.6	1.73712	5.77897	1.75204	2.44031	3.52264	4.26072	4.73463	1.57162
0.8	1.04431	6.82778	2.36449	3.75021	3.34355	3.27899	4.30424	2.29846
1	2.13688	3.4803	2.30303	4.49961	4.94058	5.1706	5.37803	3.65727
1.2	1.86759	6.39808	1.98977	4.96388	4.35727	5.17572	3.86639	3.46485
1.4	1.56082	5.15392	3.10592	3.70709	4.33024	6.33045	5.6443	2.93117
1.6	1.58811	4.98761	4.41094	5.1301	4.19128	2.67105	5.08928	2.48628
1.8	1.23409	3.68164	3.2574	2.5644	2.73345	4.43835	5.48123	3.91278
2	1.1873	4.53632	3.55234	2.6441	5.16159	6.57558	5.81789	4.37291
2.2	1.79033	4.19804	1.70166	2.33122	3.69741	6.32268	2.45293	1.45656
2.4	1.33758	2.98002	2.46398	2.58638	4.18443	6.91592	5.37121	1.44915
2.6	1.37771	3.11247	3.2363	2.09827	2.08675	3.73864	4.23778	4.44007
2.8	1.56147	3.15912	3.95282	0.60283	0.535161	6.38421	4.9949	3.55988
3	0.996746	6.47877	4.26158	2.06954	0.522522	4.57056	6.18381	4.86922
3.2	0.596383	3.56777	2.68411	2.10023	2.02367	3.19817	5.52163	3.98824
3.4	1.03256	3.81805	3.9604	2.0206	2.5184	4.92478	3.88394	3.63999
3.6	1.57998	4.41964	2.3474	1.13809	2.78817	2.33524	6.47383	4.95132
3.8	1.75958	3.24544	3.55832	2.48881	1.43842	5.23287	5.09217	2.90013
4	1.30996	0.463624	3.9822	2.16261	2.388	3.80591	7.99087	3.46711
4.2	1.85274	3.035	3.31086	1.57075	2.55105	4.60772	6.2192	3.77013
4.4	1.51071	3.23116	2.25576	2.37568	2.39161	9.43944	8.03004	4.61298
4.6	2.08899	4.79156	3.86803	2.82918	3.93828	7.25579	4.59371	2.44454
4.8	1.85539	2.29991	3.61309	2.02639	4.49283	9.17544	3.89984	1.81079
5	2.59798	1.56197	3.61706	2.00023	2.53167	8.66657	2.83289	2.42559
5.2	3.21641	2.81139	3.06369	2.64042	3.26278	4.06624	2.77011	3.43661
5.4	2.50966	3.67499	2.70535	3.11714	2.52887	3.42466	4.10188	3.34958
5.6	2.25786	3.86709	2.83973	1.57821	2.9971	7.55272	3.0361	2.26006
5.8	2.29134	5.35016	2.31604	2.22961	2.53258	5.40337	3.20037	3.00955
6	1.97297	3.01528	4.07346	2.74696	4.77234	3.28017	5.84664	3.42753
6.2	1.50443	3.8886	2.81879	1.88056	1.597	4.06349	2.06851	1.78022
6.4	3.11208	2.11643	4.25469	2.21557	5.49609	4.50635	1.71973	3.17198
6.6	1.87276	0.629375	6.60296	2.74542	1.93008	5.75601	2.82324	3.4325
6.8	3.17413	2.08477	4.99397	2.12729	4.58181	2.59869	3.85431	3.03156
7	2.53224	0.886997	5.54229	1.01385	2.55747	4.36045	3.56942	4.15177
7.2	2.48348	4.9131	5.94203	2.83484	4.48938	3.11315	2.71027	3.88448
7.4	2.03572	3.81815	6.22415	0.908055	3.14479	4.8796	3.51293	3.35914
7.6	3.31207	2.72432	6.5051	2.62326	6.9165	4.32519	3.66927	4.26377
7.8	2.5316	4.485	7.00076	1.58831	3.00068	5.13151	2.27138	2.85491
8	2.38161	4.96941	5.80614	2.93134	4.68055	6.94572	0.0298314	2.40774
8.2	3.27172	3.74526	5.13224	3.2684	8.19401	7.17447	1.66234	2.19348
8.4	3.60573	2.94227	4.5284	2.39469	5.65439	9.75883	3.43326	1.84851
8.6	3.69074	5.66265	3.01756	2.59327	7.47248	7.88146	3.6472	1.83879
8.8	2.76972	1.74244	4.66787	3.37462	5.40463	6.49173	5.0369	2.6071
9	2.77765	4.20513	5.53492	2.78595	4.34615	3.35903	4.0876	3.39529
9.2	3.79671	2.608	3.57885	2.60828	4.3148	4.09738	6.15604	2.08374
9.4	3.84666	4.2826	4.48902	2.81114	3.16102	2.84342	7.66382	2.88642
9.6	3.23665	2.07404	6.04726	4.37779	2.91671	3.43151	6.62106	1.85723
9.8	2.00293	5.54786	2.59659	2.44322	4.74719	4.54909	5.89298	4.6902
10	2.25961	5.65899	5.74	2.76243	3.64282	4.07741	2.72349	2.7456
10.2	2.76695	0.619091	4.79576	1.30859	6.57763	5.63988	4.49581	3.29206
10.4	1.97608	2.57004	3.33501	2.43598	3.564	3.62953	4.25267	2.65656
10.6	2.91316	4.10951	5.48581	2.31666	2.75489	3.86836	5.80759	1.84471
10.8	2.92825	3.22702	6.43888	2.06734	1.20503	2.84556	3.66414	3.95896
11	2.49897	4.22347	4.06258	1.93294	1.98649	5.09974	2.18264	2.00513
11.2	1.46332	3.04639	2.89368	1.96732	4.27472	2.83449	4.73704	3.21985
11.4	2.28279	2.9795	3.67645	1.6591	1.52963	4.76903	1.20687	3.85111
11.6	2.55649	2.89958	3.53433	2.81355	3.51416	2.96896	1.91524	3.13795
11.8	1.46021	1.62017	4.93719	2.73044	3.35783	4.21994	0.264452	3.57723
12	1.98551	2.8548	4.02693	2.40995	5.18352	2.03503	1.27542	4.24323
12.2	3.30079	4.43951	3.74696	2.42851	3.12459	1.4277	2.12109	1.54101
12.4	2.00711	3.18493	3.32056	1.41811	3.59751	5.02349	1.43416	3.00286
12.6	3.0006	0.947489	3.49135	1.09461	3.5606	2.70044	2.67152	1.9737
12.8	2.81916	6.0182	2.86662	3.51128	3.89879	1.96356	1.87652	1.91363
13	2.69174	3.79808	3.35586	3.4799	2.09937	2.62097	1.08623	3.42607
13.2	3.08551	2.35902	3.06177	2.47335	2.96982	4.84566	2.3219	3.19176
13.4	2.50019	4.18478	4.37547	1.96724	2.9789	3.10179	3.42652	4.5112
13.6	4.18864	5.3059	3.65626	2.43613	1.40235	4.22926	4.5699	3.60338
13.8	2.57355	4.01124	4.15167	2.54374	2.74287	1.95746	7.89223	2.81262
14	3.86377	6.54676	3.56245	2.92015	2.8961	0.724687	6.05598	3.12188
14.2	4.273	5.33601	3.52606	2.58558	2.78933	4.14251	7.20906	2.79567
14.4	4.04941	4.52907	4.21437	2.09026	2.40128	1.24194	7.94329	3.38849
14.6	3.12749	2.11145	3.51779	2.9709	2.84859	3.88779	6.10582	0.980019
14.8	3.51483	4.55828	4.7588	1.30451	4.36613	1.5982	7.60526	2.9864
15	3.74801	3.81689	2.59959	1.04431	2.63444	0.841388	4.47201	2.36645
15.2	2.15967	2.54294	3.12297	2.33957	3.10096	3.18598	6.18874	3.16078
15.4	2.98771	3.17901	2.55616	0.839869	5.30155	3.35127	8.49243	3.27042
15.6	1.59585	3.55494	3.14391	4.0093	5.48295	4.061	4.44437	4.81622
15.8	1.92659	1.93295	4.05613	1.92892	6.5303	2.11488	6.02765	1.66674
16	2.78428	4.65335	3.74013	1.95411	6.97848	3.54754	5.63401	2.07228
16.2	3.09751	4.36883	5.47627	1.84209	8.16	1.48762	5.40718	4.12942
16.4	3.10959	2.69097	3.60399	3.30248	9.06743	1.37417	6.39771	1.90005
16.6	2.97018	2.89082	4.68431	3.46266	7.94324	2.41094	5.34443	2.41145
16.8	1.94483	3.96718	3.15805	2.61664	6.47558	4.36984	6.74881	1.84288
17	2.63201	2.64522	3.6934	3.41582	6.3804	1.24549	6.23298	1.66694
17.2	1.949	4.49403	4.25828	3.08167	8.45475	3.57239	8.7972	2.35461
17.4	3.80527	5.4041	3.35554	1.81222	6.35629	3.1886	6.46849	0.412137
17.6	2.1965	3.77963	2.25896	3.7011	7.44935	3.3694	5.65195	2.95625
17.8	2.14009	2.63115	4.68479	3.3795	8.00483	2.46505	6.41299	2.22066
18	1.71785	1.3933	5.25411	1.62251	8.01235	3.69673	6.52854	2.61046
18.2	3.02482	4.81661	2.26691	3.51085	5.03582	2.44752	4.87848	2.04474
18.4	3.35943	4.84386	4.12804	2.61001	10.2314	2.82892	5.30313	3.99673
18.6	2.60304	5.01489	3.13172	2.74157	6.90824	1.02915	7.88182	3.68803
18.8	2.37593	4.92402	1.38652	1.00749	7.28583	3.28867	6.14842	1.53117
19	3.15856	5.14944	2.96252	2.54596	5.34453	6.80018	5.64933	1.04334
19.2	3.03689	4.62204	3.13364	2.16	4.85965	4.25338	6.59432	3.227
19.4	4.82323	5.00117	2.43557	4.30402	5.84192	4.03427	7.81592	2.04876
19.6	3.72972	3.15339	1.80388	3.96438	4.2386	4.46176	4.77013	2.41024
19.8	3.87214	7.00663	3.97007	1.84635	6.06188	4.30092	5.49595	2.89524
20	5.43471	9.52501	2.30944	5.15845	3.833	3.84358	3.33921	3.13114
20.2	4.58978	8.66325	1.93288	2.57309	1.1157	1.8856	4.7356	1.66508
20.4	4.72296	9.28354	2.91872	1.04638	3.28996	2.27625	2.9724	1.9248
20.6	6.30137	7.27667	2.07223	2.51116	1.56935	8.06766	4.42101	2.36174
20.8	5.17308	8.12596	3.83339	2.9888	3.32133	9.19348	3.51307	3.21196
21	4.48398	7.19644	1.3185	3.27874	4.12617	4.61574	2.12022	5.26039
21.2	4.88326	10.0554	1.97342	2.88685	2.55149	5.40524	2.24003	1.94592
21.4	3.34158	7.22233	1.92712	1.89674	4.29731	5.90356	2.98103	1.13261
21.6	5.23646	4.95662	1.361	2.31547	4.03471	5.69723	1.35905	2.32816
21.8	5.54614	10.4809	2.6091	2.36518	4.25529	3.9699	3.03446	1.94394
22	4.54002	8.17282	2.28515	2.53735	1.9573	2.54542	2.31485	2.5641
22.2	4.22944	6.6772	2.70955	3.82707	4.01028	5.20557	1.1491	3.17237
22.4	5.62149	4.73093	4.94128	3.14576	4.13542	5.13646	2.44572	1.9848
22.6	5.40303	4.49059	5.33447	2.22455	5.00338	3.10653	2.78164	2.08065
22.8	4.10598	5.91208	5.0132	2.24297	2.15617	3.83431	1.0643	3.01703
23	4.80237	6.22765	3.80773	4.12595	3.91272	2.02645	3.46048	1.63155
23.2	4.22467	5.34549	2.30406	3.16052	3.25457	4.38924	2.19208	2.61273
23.4	3.67416	3.32256	2.42575	3.28964	1.2901	2.65297	3.78427	3.29925
23.6	4.49548	2.87053	1.29894	2.12017	4.27453	2.07712	4.94809	1.6056
23.8	4.12036	0.828873	2.44719	2.99956	3.15801	3.92918	3.88339	3.03417
24	2.88698	3.79139	4.8206	2.03326	0.0158511	3.11473	3.7472	1.93141
24.2	5.26028	2.30162	1.87173	2.13793	1.60726	4.93467	4.50411	0.970685
24.4	4.74958	4.18893	0.832232	3.52081	3.55434	2.80334	3.35951	3.15883
24.6	4.53085	5.8289	0.774705	3.22858	1.37156	4.2494	2.94005	1.05364
24.8	4.28249	4.97144	1.99509	3.46122	2.90375	3.91761	3.38145	1.24275
25	4.29568	1.22209	3.45056	3.53079	3.41267	3.77167	5.26706	2.17063
25.2	4.1687	2.47948	2.44478	2.07577	5.20069	1.30538	3.79061	3.09269
25.4	3.95877	3.55087	3.26166	3.49368	2.4855	3.96079	4.23945	2.04259
25.6	2.84705	3.0727	0.934697	4.71054	3.22252	3.123	5.59932	2.38609
25.8	2.86318	3.68016	1.8875	3.8155	3.24433	2.52418	4.59965	2.6819
26	3.28595	4.36156	2.87867	3.20625	4.51211	1.85688	5.71395	3.17519
26.2	3.19959	2.62526	0.836232	1.5768	4.93133	2.61258	5.2504	1.53035
26.4	2.54793	4.39163	1.29087	2.61807	5.95395	0.761489	4.17993	2.36763
26.6	4.34341	1.44719	0.575285	2.71802	3.76409	1.70207	2.3506	2.58435
26.8	4.11928	5.15296	0.777531	4.33656	5.7734	1.72004	3.68474	1.98096
27	5.28099	3.07663	2.22324	3.76066	1.5435	1.35585	5.76114	2.44321
27.2	2.4583	10.4254	1.50922	5.42803	4.40705	2.46515	5.07208	1.49798
27.4	2.73012	9.06547	1.64915	4.55577	2.32702	4.20454	5.03428	2.42856
27.6	2.58825	10.0804	2.33046	2.87362	7.02178	2.87347	5.61652	1.4467
27.8	2.98786	7.36762	2.97851	3.49821	4.83866	2.61852	5.02235	1.78626
28	2.46969	6.77406	2.194	4.302	4.31368	1.63777	6.83028	2.88392
28.2	4.52749	3.15908	3.50937	3.07483	4.54448	1.89998	3.72918	1.05467
28.4	3.65128	2.96304	2.42264	2.47045	4.65266	0.596813	3.33637	2.20287
28.6	4.28507	8.78984	2.77514	3.27593	3.04038	1.98687	5.01269	3.01141
28.8	3.6427	4.13635	1.57041	3.96026	2.02283	3.95451	2.96092	3.04663
29	2.34388	2.33919	1.81329	2.98919	1.75692	2.4552	2.76825	2.42991
29.2	4.80748	7.32843	1.67332	3.97697	2.82491	3.16605	2.75827	0.663449
29.4	4.48959	5.57984	1.90327	3.01701	3.58857	2.83867	2.0993	2.00451
29.6	4.08779	3.76084	1.72821	6.08508	2.51075	1.4462	6.85345	2.27593
29.8	3.9456	2.16278	3.17458	2.40975	3.52834	2.95449	2.10006	2.16171
30	4.36759	6.66481	5.14711	4.37789	1.10331	0.897809	3.2233	4.2185
		Cumulative Data
Summary	Axon1	Axon2	Axon3	Axon4	Axon6	Axon7	Axon8	Axon9
	456.159	651.344	497.299	418.633	596.598	575.867	657.785	409.727

## Sheet: WT-Culture2-seq03
		Raw Data
Time (S)	Area1	Angle1	IntDen1	RawIntDen1	Length1	Area2	Angle2	IntDen2	RawIntDen2	Length2	Area3	Angle3	IntDen3	RawIntDen3	Length3	Area4	Angle4	IntDen4	RawIntDen4	Length4	Area5	IntDen5	RawIntDen5	Area6	Angle6	IntDen6	RawIntDen6	Length6	Area7	Angle7	IntDen7	RawIntDen7	Length7	Area8	Angle8	IntDen8	RawIntDen8	Length8	Area9	Angle9	IntDen9	RawIntDen9	Length9
0	6	63.4349	27483.7	27483.7	5.01734	6	45	10423.2	10423.2	4.75091	5	-104.036	10096.6	10096.6	4.38926	6	-45	16909.8	16909.8	4.77297	1022	1.30279e+06	1.30279e+06	6	0	12259.9	12259.9	5.27187	5	-126.87	13332.3	13332.3	4.43784	8	0	19071.5	19071.5	6.50053	7	-59.0362	13882.6	13882.6	5.9296
0.2	6	63.4349	23689.1	23689.1	5.01734	6	45	14682	14682	4.75091	5	-104.036	9202.81	9202.81	4.38926	6	-45	20666.4	20666.4	4.77297	1022	1.16892e+06	1.16892e+06	6	0	12711.5	12711.5	5.27187	5	-126.87	8197.37	8197.37	4.43784	8	0	20155.8	20155.8	6.50053	7	-59.0362	12476.4	12476.4	5.9296
0.4	6	63.4349	22299.6	22299.6	5.01734	6	45	14836.8	14836.8	4.75091	5	-104.036	10586.2	10586.2	4.38926	6	-45	21173.5	21173.5	4.77297	1022	1.17942e+06	1.17942e+06	6	0	9624.7	9624.7	5.27187	5	-126.87	9471.8	9471.8	4.43784	8	0	17469.5	17469.5	6.50053	7	-59.0362	19017.9	19017.9	5.9296
0.6	6	63.4349	18735.8	18735.8	5.01734	6	45	14611.2	14611.2	4.75091	5	-104.036	10508	10508	4.38926	6	-45	22204.2	22204.2	4.77297	1022	1.13035e+06	1.13035e+06	6	0	10429.5	10429.5	5.27187	5	-126.87	11407.6	11407.6	4.43784	8	0	20329.1	20329.1	6.50053	7	-59.0362	21135.2	21135.2	5.9296
0.8	6	63.4349	26253.8	26253.8	5.01734	6	45	16653.7	16653.7	4.75091	5	-104.036	7173.35	7173.35	4.38926	6	-45	23761.5	23761.5	4.77297	1022	1.1296e+06	1.1296e+06	6	0	10251.4	10251.4	5.27187	5	-126.87	14696.1	14696.1	4.43784	8	0	23230.5	23230.5	6.50053	7	-59.0362	18986.2	18986.2	5.9296
1	6	63.4349	33153.6	33153.6	5.01734	6	45	12507.7	12507.7	4.75091	5	-104.036	9009.37	9009.37	4.38926	6	-45	29892.9	29892.9	4.77297	1022	1.17519e+06	1.17519e+06	6	0	12130.5	12130.5	5.27187	5	-126.87	11755.1	11755.1	4.43784	8	0	25128.3	25128.3	6.50053	7	-59.0362	21005.6	21005.6	5.9296
1.2	6	63.4349	33474.8	33474.8	5.01734	6	45	16498.5	16498.5	4.75091	5	-104.036	9784.68	9784.68	4.38926	6	-45	33589.4	33589.4	4.77297	1022	1.16161e+06	1.16161e+06	6	0	12710.5	12710.5	5.27187	5	-126.87	13134.5	13134.5	4.43784	8	0	22852.4	22852.4	6.50053	7	-59.0362	27434.3	27434.3	5.9296
1.4	6	63.4349	41422.8	41422.8	5.01734	6	45	15729.4	15729.4	4.75091	5	-104.036	10963.5	10963.5	4.38926	6	-45	31839.6	31839.6	4.77297	1022	1.15976e+06	1.15976e+06	6	0	10099	10099	5.27187	5	-126.87	8940.94	8940.94	4.43784	8	0	23371.1	23371.1	6.50053	7	-59.0362	35277.1	35277.1	5.9296
1.6	6	63.4349	49039.4	49039.4	5.01734	6	45	11003	11003	4.75091	5	-104.036	9601.31	9601.31	4.38926	6	-45	37176.7	37176.7	4.77297	1022	1096651	1096651	6	0	8280.5	8280.5	5.27187	5	-126.87	11487	11487	4.43784	8	0	24752.7	24752.7	6.50053	7	-59.0362	39033.6	39033.6	5.9296
1.8	6	63.4349	41602.8	41602.8	5.01734	6	45	14335.7	14335.7	4.75091	5	-104.036	11287.3	11287.3	4.38926	6	-45	39370.7	39370.7	4.77297	1022	1.17094e+06	1.17094e+06	6	0	12289.5	12289.5	5.27187	5	-126.87	9685.52	9685.52	4.43784	8	0	24781.1	24781.1	6.50053	7	-59.0362	42726.3	42726.3	5.9296
[truncated: 603 more rows]

## Sheet: WT-Culture3-seq01
		Raw Data
[truncated: 614 more rows]

[truncated: 32 more sheets: WT-Culture3-seq02, WT-Culture3-seq03, WT-Culture4-seq01, WT-Culture4-seq02, WT-Culture4-seq03, WT-Culture5-seq01, WT-Culture5-seq02, WT-Culture5-seq03, P554A-Culture1-seq01, P554A-Culture1-seq02, P554A-Culture1-seq03, P554A-Culture2-seq01, P554A-Culture2-seq02, P554A-Culture2-seq03, P554A-Culture3-seq01, P554A-Culture3-seq02, P554A-Culture3-seq03, P554A-Culture4-seq01, P554A-Culture4-seq02, P554A-Culture4-seq03 …]
