# Supplementary material for: A proline-rich motif on VGLUT1 reduces synaptic vesicle super-pool and spontaneous release frequency
Source: eLife journal article supplement (doi:10.7554/elife.50401), 2019-10-30
Supplement: supp [file elife-50401-supp-v1.zip › elife_poa_e50401_Figure_4_source_data_8.xlsx]

## Sheet: WT
Culture 1	20160131	Culture 2	20160201	Culture 3	201602012	Culture 4	20160205	Culture 5	20160206
	1.03687		0.49158		0.420351		0.232283		0.122962
	0.920901		0.98316		0.653879		1.17293		0.786955
	1.17875		0.98316		0.653879		1.27605		0.819744
	0.841967		1.02249		0.770643		0.131214		0.933248
	0.491147		1.07254		0.810242		0.984107		0.983693
	1.08052		1.14702		0.829924		1.16304		0.983693
	1.11042		1.16192		0.882737		1.37775		0.983693
	1.6699		1.1675		0.980819		2.29625		1.05936
	1.76813		1.1675		1.06255		2.41553		1.16255
	2.37388		1.20164		1.06998		2.55868		1.16814
	1.22123		1.21725		1.0898		2.67115		1.33275
	0.818579		1.26406		1.14429		0.105471		1.3414
	1.82426		1.26406		1.19878		0.738298		1.47554
	1.38249		1.26406		1.22602		0.738298		1.52025
	0.982295		1.32727		1.37315		0.861347		1.63949
	0.0613934		1.39281		1.37315		0.918771		1.81
	0.654863		1.39712		1.37315		0.984397		1.96739
	0.846806		1.43005		1.55777		0.984397		1.96739
	0.982295		1.44743		1.56931		0.984397		1.96739
	1.22787		1.49295		1.59383		1.08284		1.96739
	3.09801		1.51943		1.65191		1.09377		1.96739
	1.44455		1.53619		1.96164		1.26565		2.02887
	1.07128		1.55037		1.96164		1.31253		2.10791
	1.43357		1.59763		1.96164		1.31253		2.36086
	1.00074		1.66381		1.96164		1.42191		3.5249
	1.05598		1.72053		2.28858		1.43558		4.26267
	0.615988		1.75259		2.35397		1.4766		0.680609
	0.703986		1.76969		2.69725		1.50941		0.702216
	0.610121		1.80246		2.94246		1.54691		0.737327
	2.23996		1.868		1.09717		1.59965		0.983102
	1.27172		1.96632		1.26216		1.61722		0.983102
	1.16478		1.96632		0.552196		1.64066		1.09234
	1.64263		1.96632		0.638093		1.64066		1.12355
	1.31411		1.96632		1.54264		1.73717		1.16743
	0.957421		1.96632		0.675667		1.83754		1.47465
	0.591348		2.21211		0.737091		1.84574		1.52927
	0.937503		2.27914		0.78623		1.84574		1.67127
	0.907771		2.4579		0.83159		1.8793		1.84332
	1.4933		2.62176		1.31038		1.96879		1.88428
	1.12638		2.70369		1.31038		1.96879		1.9662
	1.57693		2.75285		1.3759		1.96879		2.68715
	0.606511		2.94948		1.54438		2.09184		3.14593
	0.0579753		4.9158		1.63798		2.18755		4.58781
	1.86165		0.327779		1.63798		2.29693		0.405071
	1.37981		0.655558		1.75867		2.46099		0.913477
	1.47837		0.702384		2.21127		2.46099		0.983744
	2.01045		0.737503		2.45697		2.46099		0.983744
	1.30474		0.885004		2.59099		2.67193		0.983744
	1.47706		0.983337		3.43976		2.70709		0.983744
	1.96942		1.17366		3.43976		2.75631		0.983744
	1.68807		1.24556		3.68545		2.80175		1.02309
	1.57553		1.26882		3.93115		2.95319		1.08212
	3.28236		1.27834		4.07155		0.328297		1.0873
	0.853414		1.37667		4.12771		0.369334		1.09305
	1.96942		1.37667		4.63314		0.430889		1.12428
	1.20706		1.42414		4.91394		0.626748		1.13509
	0.492354		1.47501		5.24154		0.669725		1.20235
	1.5474		1.54524		0.985403		0.722252		1.22968
	0.689296		1.56606		1.05579		0.738667		1.22968
	1.96942		1.59792		1.14964		0.761051		1.24608
	1.40673		1.6389		1.31387		0.886401		1.26481
	1.77247		1.6389		1.34373		0.902816		1.29995
	1.50051		1.6389		1.97081		0.98489		1.33508
	1.47706		1.67167		2.21716		0.98489		1.37206
	1.50989		1.70193		2.5083		0.98489		1.37724
	1.40673		1.72084		3.0219		0.98489		1.40535
	0.633027		1.88473		3.57209		1.06696		1.43778
	0.140673		2.13056		3.80084		1.06931		1.44282
	1.64118		2.41365		0.603017		1.108		1.47562
	1.68807		2.95001		0.638488		1.19594		1.52033
	1.90787		2.95001		0.812621		1.20728		1.53977
	1.51494		2.95001		0.822295		1.2147		1.60506
	1.47706		3.1139		0.986755		1.22262		1.66007
	1.47706		3.84396		0.986755		1.39043		1.67237
	1.35397		4.26113		1.07646		1.41578		1.74888
	1.0241		0.326832		1.3503		1.49064		1.84452
	1.47706		0.392199		1.36628		1.53205		1.906
	1.68807		0.54472		1.60997		1.96978		4.26289
	1.31294		0.588298		1.64459		2.16676		0.692308
	1.60015		0.603382		1.64459		2.19706		0.708334
	1.35397		0.857934		1.76794		2.29808		0.882693
	1.31785		0.871552		1.97351		2.46222		0.98077
	2.94718		0.939642		2.16146		3.93956		1.03526
	2.84894		0.980496		2.17086		0.546924		1.04337
	2.57879		0.980496		2.18125		0.565542		1.08401
	0.777729		1.15353		2.65995		0.615289		1.11154
	0.294718		1.19838		3.25629		0.703188		1.14423
	1.30986		1.22562		3.3303		0.765693		1.23662
	1.57183		1.30733		0.874359		0.805469		1.28726
	0.421507		1.34818		0.894231		0.820385		1.37308
	0.655678		1.38423		0.983654		0.84934		1.39206
	0.737638		1.47074		0.983654		1.04599		1.56923
	0.786814		1.47074		1.0872		1.09385		1.65505
	0.983517		1.50343		1.2647		1.16346		1.71635
	0.983517		1.56879		1.30096		1.18136		1.71635
	0.983517		1.67501		1.31154		1.26574		1.76539
	1.03035		1.96099		1.31154		1.31262		2.125
	1.03816		2.00362		1.32793		1.54701		2.28846
	1.04908		2.25514		1.36198		1.65804		2.64808
	1.10646		2.48008		1.44655		2.3381		2.69712
	1.16959		3.92199		1.45206		2.37429		2.72436
	1.20208		0.490274		1.47548		0.68955		3.06491
	1.20704		0.653698		1.52019		0.713328		0.769443
	1.21956		0.653698		1.53013		0.788058		0.919746
	1.30373		0.653698		1.63942		0.985072		1.12883
	1.34116		0.840469		1.72139		1.08358		1.13842
	1.39332		1.14397		1.78846		1.19616		1.16194
	1.40502		1.15358		1.80337		1.31343		1.22298
	1.43745		1.17666		1.81598		1.31343		1.3109
	1.44939		1.18342		1.82679		1.51044		1.35187
	1.47528		1.19845		1.82679		1.57612		1.44585
	1.47528		1.29019		1.96731		1.97014		1.47476
	1.51998		1.29432		1.96731		2.21641		2.0756
	1.53429		1.3074		1.96731		2.25987		2.08925
	1.57363		1.37277		2.06567		2.2985		2.24726
	1.57363		1.40078		2.21322		2.2985		2.45794
	1.63919		1.41635		2.29519		2.46268		0.393654
	1.65231		1.47082		2.45913		3.61193		0.421772
	1.67198		1.54625		2.5294		4.15919		0.65609
	1.80311		1.56888		2.5575		13.2985		0.820112
	1.80311		1.63425		3.09148		0.875842		0.92449
	2.10754		1.63425		3.6887		0.948829		0.984135
	2.24804		1.64732		4.91827		1.14954		0.984135
	2.55714		1.72763		0.4538		1.77358		1.04378
	2.73199		1.83853		0.53631		1.97064		1.06615
	0.421869		1.86304		0.561848		2.16771		1.08773
	0.590617		1.96109		0.722376		0.417013		1.15781
	0.843738		2.10117		0.983234		0.436871		1.16307
	0.9253		2.45137		1.05887		0.524245		1.24657
	0.984361		2.45137		1.14711		0.53616		1.26532
	1.02222		2.61479		1.16759		0.561691		1.427
	1.09373		2.6965		1.21266		0.561691		1.4762
	1.12498		2.6965		1.22904		0.73722		1.56567
	1.16104		0.14074		1.29373		0.73722		1.57462
	1.23045		0.227349		1.31098		0.884663		1.57462
	1.29197		0.285183		1.3372		0.953173		1.64022
	1.68748		0.358247		1.3578		1.00151		1.66546
	1.68748		0.492589		1.54508		1.27785		1.68709
	1.77185		0.656786		1.72066		1.31061		1.70583
	1.96872		0.738884		1.72066		1.31061		1.79712
	2.07055		0.738884		1.75272		1.31061		1.80425
	2.75621		0.774069		1.85079		1.8255		1.80425
	2.76852		0.820982		1.90502		1.87656		1.82768
	2.81885		0.862031		1.96647		2.81782		1.96827
	2.83004		0.895617		2.05197		4.9148		2.2143
	2.8636		0.895617		2.24739				2.39004
	0.196808		0.909395		2.26144				2.46034
	0.492021		0.927227		2.29421				2.62436
	0.593319		0.931925		2.35976				0.328623
	0.702887		0.985178		2.50278				0.422516
	0.760396		0.985178		2.54002				0.591522
	0.814379		0.985178		2.55641				0.612838
	0.820035		0.985178		2.9497				0.622655
	0.832651		1.05086		2.9497				0.862636
	0.885638		1.09464		3.93294				0.891978
	1.04193		1.11952		4.26068				0.98587
	1.06277		1.23147		0.73893				0.98587
	1.08245		1.23147		0.864598				0.98587
	1.18085		1.31357		0.98524				0.98587
	1.25739		1.31357		1.0105				1.02379
	1.2652		1.37925		1.18229				1.06171
	1.2652		1.42851		1.28839				1.77457
	1.37766		1.43299		1.33297				1.80743
	1.38924		1.47777		1.3547				1.8622
	1.69971		1.54814		1.3984				2.21821
	1.81669		1.64196		1.52264				2.21821
	1.84508		1.80616		1.64207				2.30036
	0.981547		1.97036		1.64207				2.4099
	0.981547		1.97036		1.67491				2.57843
	0.981547		2.12591		1.73866				2.62899
	1.47232		2.13455		1.82973				2.62899
	1.63591		2.14421		1.85457				2.68874
	1.92534		2.25184		1.97048				2.87188
	2.20848		2.29875		1.97048				2.95761
	2.36464		2.58609		1.97048				3.35196
	2.45387		2.79134		1.97048				3.61486
	2.84649		2.95553		0.422294				0.655993
	0.657874		3.61232		0.772303				0.737992
	0.822343		5.91107		0.821127				0.737992
	0.86346		0.738672		0.862183				0.819991
	0.986811		0.824564		1.11972				0.84342
	0.986811		0.984896		1.18242				0.874658
	1.11016		1.11622		1.24811				0.874658
	1.12778		1.14041		1.24972				0.98399
	1.25818		1.21664		1.35486				0.98399
	1.29844		1.23112		1.37949				1.03578
	1.31575		1.47734		1.47803				1.06599
	1.44226		1.73206		1.7361				1.25235
	1.56993		1.77281		1.81911				1.28676
	1.5789		2.29809		1.84218				1.31199
	1.5789		4.43203		1.9707				1.51113
	1.5789		0.547772		1.9707				1.59898
	1.58748		0.657326		2.13493				3.44396
	1.60357		0.944906		2.46338				3.68996
	1.64469		0.949471		2.95606				4.70128
	1.64469		0.985989		0.197239
	1.64469		1.09976		0.394478
	1.69168		1.1738		0.946747
	1.77626		1.23249		0.986195
	1.80915		1.44106		0.986195
	2.23331		1.47898		0.986195
	2.46703		1.51691		1.02564
	3.45384		1.93911		1.15056
	3.94725		1.97198		1.18343
	0.164492		2.08153		1.20535
	0.370106		2.08153		1.23274
	0.548305		2.12367		1.26796
	0.636742		2.95797		1.28435
	0.657966		5.09428		1.29998
	0.754726		0.985468		1.31493
	0.845957		0.985468		1.31493
	0.852366		1.17498		1.31493
	0.855356		1.31396		1.31493
	0.921153		1.4782		1.35602
	0.98695		2.71004		1.38067
	0.98695		0.626677		1.38067
	0.98695		0.729465		1.39711
	1.05745		0.738583		1.40885
	1.10306		0.820648		1.4245
	1.17797		0.844095		1.47929
	1.24667		0.875358		1.47929
	1.40993		0.909026		1.47929
	1.41874		1.23097		1.51217
	1.46215		1.47717		1.51451
	1.53526		0.491901		1.54973
	1.57912		0.546557		1.57791
	1.69191		0.668985		1.64366
	1.74614		0.737852		1.64366
	1.80941		0.836232		1.68233
	1.81599		0.852629		1.74034
	1.9739		0.874491		1.80802
	2.08356		0.929147		1.80802
	2.17129		0.983802		2.02429
	2.21213		0.983802		2.30112
	2.22064		0.983802		2.58876
	2.79636		0.983802		2.76135
	3.35563		1.03558		2.84901
	3.50915		1.06935		2.95858
	1.96615		1.08218		1.15335
	1.0923		1.18056		1.18049
	2.94922		1.26489		1.22968
	0.835613		1.27894		1.31166
			1.31174		1.77074
			1.37732		1.96749
			1.4757		2.09045
			1.4757		2.45936
			1.4757		2.45936
			1.4757		2.56866
			1.54597		2.62331
			1.57408		3.14798
			1.63967		4.91871
			1.63967		9.83743
			1.67246
			1.77084
			1.9676
			2.11896
			2.16436
			2.19464
			2.62347
			2.81086
			2.95141
			3.93521
			3.93521
			0.54625
			0.842786
			0.983251
			1.04109
			1.0925
			1.1799
			1.22906
			1.24545
			1.3408
			1.43501
			1.52245
			1.5732
			1.63875
			1.66396
			1.68557
			1.9665
			2.10697
			0.462111
			0.552367
			0.613742
			0.631277
			0.743929
			0.851055
			0.892715
			0.927432
			0.981986
			1.06382
			1.16053
			1.16903
			1.17838
			1.30932
			1.30932
			1.47298
			1.54312
			1.58385
			1.59573
			1.63664
			1.63664
			1.76758
			1.8129
			1.84613
			1.8747
			1.96397
			1.96397
			1.96397
			3.27329
			3.92795
			3.92795

## Sheet: S540A
Culture 1	20160131	Culture 2	20160201	Culture 3	201602012	Culture 4	20160206
	0.656324		0.362419		0.788204		0.454168
	0.711017		0.437204		0.492627		0.781436
	0.721956		0.546505		0.394083		1.04821
	0.765711		0.562119		0.622236		1.12753
	0.810753		0.590225		0.725942		1.20004
	0.937605		0.655805		0.766273		1.31204
	0.948023		0.655805		0.788166		1.47605
	0.984486		0.721386		0.895643		2.03835
	1.10755		0.723315		0.935947		3.94309
	1.16169		0.786967		0.985208		2.95732
	1.1985		0.983708		0.985208		2.67567
	1.20326		1.09301		0.985208		2.40966
	1.21167		1.11487		0.985208		2.02953
	1.23061		1.12424		1.03994		1.69351
	1.32906		1.12424		1.05089		1.68989
	1.34911		1.14766		1.06299		1.57723
	1.47673		1.15586		1.23151		1.42937
	1.59979		1.20856		1.25888		1.40283
	1.72285		1.26477		1.2667		1.31436
	1.7502		1.2831		1.54818		1.23221
	2.36277		1.29671		1.56903		1.22372
	2.46121		1.31161		1.72411		1.20483
	2.50596		1.31161		1.80621		1.17745
	6.39916		1.4053		1.86095		1.07027
	0.985095		1.47556		2.46302		0.985772
	0.985095		1.47556		2.46302		0.985772
	0.985095		1.52028		2.75858		0.985772
	1.09455		1.55489		4.40396		0.985772
	1.11644		1.63951		2.95789		0.985772
	1.14271		1.74881		1.84868		0.985772
	1.16603		1.89715		1.77473		0.961729
	1.25873		1.96742		1.69805		0.903624
	1.27241		2.34216		1.64327		0.857193
	1.28062		2.5584		1.52376		0.80094
	1.31346		2.07733		1.47894		0.774535
	1.47764		1.968		1.47894		0.657181
	2.58587		1.968		1.405		0.591463
	0.492016		1.82743		1.3557		0.10953
	0.843456		1.82743		1.31462		2.78309
	0.984032		1.7712		1.28934		0.468923
	1.09337		1.722		1.19724		0.492369
	1.10704		1.66523		1.05639		0.605993
	1.23004		1.19116		0.985962		0.615462
	1.31204		1.1685		0.953097		0.703385
	1.31204		1.148		0.862717		0.765908
	1.47605		1.12457		0.709893		0.805695
	1.58148		1.1152		0.554604		0.984738
	1.96806		1.0824		0.56256		1.05039
	1.96806		1.025		0.656321		1.07426
	2.16487		0.920515		0.738361		1.156
	2.29608		0.905279		1.45532		1.31298
	2.46008		0.894544		1.50954		1.34283
	2.67094		0.773142		1.53141		1.44428
	3.37382		0.694587		1.54704		1.47711
	2.94904		0.632571		1.79523		1.47711
	2.94904		0.626181		2.95344		1.47711
	2.78521		0.614999		3.06283		1.50302
	2.43413		0.357818		3.15034		1.50993
	2.41285		0.245963		3.44568		1.57558
	2.10646		0.694483		3.11952		1.57558
	1.68956		0.794649		2.46278		1.57558
	1.58551		0.90817		2.2986		1.65295
	1.54474		0.913576		2.26576		1.68812
	1.53596		0.915999		1.97023		1.79043
	1.31069		0.983851		1.97023		2.36337
	1.24515		1.03563		1.97023		2.53218
	1.22877		1.07329		1.97023		2.73538
	1.17962		1.07329		1.90866		2.95422
	0.724326		1.08224		1.89445		3.61071
	0.655343		1.09737		1.72395		3.44593
	0.614384		1.18062		1.68876		2.58444
	0.336529		1.20248		1.64185		2.21524
	0.369581		1.2181		1.60081		1.9691
	0.657032		1.22981		1.47767		1.92972
	0.739161		1.25217		1.43978		1.26585
	0.839541		1.27901		1.43978		1.20334
	0.895953		1.3118		1.4073		1.17082
	1.02345		1.32606		1.37916		0.98455
	1.12634		1.35612		1.3299		0.918913
	1.18266		1.37739		1.31348		0.868721
	1.31406		1.50857		1.31348		0.738413
	1.47832		1.57416		1.2962		0.218789
	1.52525		1.63975		1.28065		0.42041
	1.58285		1.63975		1.25378		0.560547
	1.64258		1.63975		1.24588		0.713424
	1.64258		1.63975		1.23139		0.840821
	1.65987		1.66498		1.18214		0.882862
	1.71174		1.67255		1.18214		0.923254
	1.72471		1.69099		1.10825		0.980958
	1.78859		1.77093		1.09457		0.980958
	1.91312		1.80373		1.08702		1.2262
	1.9711		2.16447		1.08362		1.30794
	2.06496		2.45963		0.985113		1.30794
	2.16821		2.55801		0.985113		1.30794
	2.46387		2.6236		0.94993		1.33767
	2.58706		2.95155		0.861973		1.37334
	3.03211		2.95155		0.570328		1.43056
	2.62783		3.06087		0.164185		1.47144
	2.54138		6.88696		0.109457		1.47144
	2.46359		2.25177		1.40699		1.55318
	2.29935		1.8178		1.64219		1.56953
	2.19483		0.818827		0.933457		1.69438
	2.05299		1.04039				1.71668
	1.97087		1.25057				1.88017
	1.97087		2.70213				1.96192
	1.77378		1.09819				2.10205
	1.69714		1.73399				2.18829
	1.59186		2.62025				4.0611
	1.58764		0.751394				3.2817
	1.50714		3.68697				2.95353
	1.47815		3.19538				2.95353
	1.42888		2.94958				2.95353
	1.26136		2.37605				2.46127
	1.23179		2.29412				2.29719
	1.20223		2.07563				2.29719
	1.07502		1.96639				2.16592
	0.946017		1.87701				2.1331
	0.739076		1.84349				2.10029
	0.610031		1.82593				2.07841
	0.60221		1.7042				1.96902
	0.492717		1.61938				1.96902
	0.340645		1.59769				1.96902
	0.656057		1.52941				1.87057
	0.663685		1.5126				1.82838
	0.718116		1.49445				1.77212
	0.902078		1.47479				1.72289
	1.3004		1.42017				1.66136
	1.34193		1.42017				1.64085
	1.46026		1.39916				1.62155
	1.47613		1.39286				1.61102
	1.89247		1.34072				1.57522
	1.96817		1.33433				1.52151
	3.11869		1.31092				1.37831
	2.13384		1.31092				1.36737
	2.01894		1.31092				1.31268
	2.00253		1.29044				1.31268
	1.8142		1.22899				1.29955
	1.54382		1.22899				1.18141
	1.5404		1.19388				1.18141
	1.48928		1.09886				1.16351
	1.47727		1.09244				1.12515
	1.45382		1.08151				1.06024
	1.25344		1.04874				1.02097
	1.25158		0.983193				0.98451
	1.19895		0.983193				0.98451
	1.15248		0.983193				0.87512
	1.13873		0.546218				0.87512
	0.935606		0.245798				0.67685
	0.738637		0.140456				0.10939
	0.246078		1.84909				0.492077
	0.328103		0.122948				0.574089
	0.551214		0.459007				0.656102
	0.574181		0.590152				0.765453
	0.615194		0.614741				0.890424
	0.828893		0.680944				0.929478
	0.828893		0.694296				0.984153
	0.843695		0.786869				1.05986
	0.861272		0.786869				1.32861
	0.902284		0.804752				1.47623
	1.11555		0.922112				1.55824
	1.18117		0.983586				2.29636
	1.20305		1.05384				2.46038
	1.23039		1.15716				2.29978
	1.26554		1.1885				1.87268
	1.2796		1.20216				1.37987
	1.47647		1.21502				1.28889
	1.87019		1.22948				1.26723
	1.96862		1.25184				1.14989
	2.0581		1.33487				1.09514
	2.55921		1.46048				1
	2.58381		1.47538				0.985622
	4.4294		1.47538				0.985622
	4.92155		1.47538				0.88706
			1.49676
			1.50431
			1.57374
			1.63931
			1.72128
			1.7486
			1.80324
			1.96717
			1.96717
			2.10768
			2.1311
			2.21307
			2.49175
			2.81025
			0.433432
			0.985072
			0.985072
			1.18209
			1.23134
			1.34328
			1.41105
			1.77313
			2.36417
			2.62686

## Sheet: P554A
Culture 1	20160131	Culture 2	201601312	Culture 3	20160201	Culture 4	201602012
	0.737467		3.61326		2.70827		3.27965
	0.842819		3.44902		2.67309		2.95169
	0.867608		2.9563		2.46206		2.95169
	0.907652		2.91151		2.46206		2.57326
	0.913054		2.58677		2.29792		2.36135
	0.915476		2.53397		2.21585		1.85847
	0.931537		2.46359		2.07907		1.74915
	0.983289		2.25242		1.96965		1.73629
	0.983289		2.09802		1.96965		1.58279
	0.983289		1.97087		1.96965		1.57423
	1.03504		1.97087		1.8993		1.52504
	1.1062		1.64239		1.86413		1.51684
	1.14717		1.5767		1.86022		1.47584
	1.1543		1.56774		1.80551		1.47584
	1.15681		1.54854		1.64137		1.41435
	1.15681		1.35497		1.522		1.27906
	1.16766		1.28865		1.34294		1.26195
	1.17058		1.28865		1.29258		1.20254
	1.1736		1.23179		1.29121		1.18067
	1.17995		1.1702		1.28027		1.13526
	1.2102		1.1702		1.12551		0.983895
	1.21465		1.1646		1.12551		0.983895
	1.22911		1.12621		1.12551		0.983895
	1.26423		1.10861		1.09425		0.908211
	1.29615		1.0434		1.05048		0.819913
	1.31105		1.04018		0.984824		0.702782
	1.34085		0.985434		0.984824		0.636506
	1.4047		0.837619		0.984824		0.721374
	1.41348		0.806265		0.909068		0.752234
	1.47493		0.71668		0.909068		0.786953
	1.51275		0.703882		0.609653		0.945857
	1.52956		0.627095		0.268588		1.18043
	1.57326		0.860633		0.21885		1.22961
	1.63882		0.983581		0.530933		1.40527
	1.66403		1.06555		0.657345		1.6202
	1.66732		1.08896		0.939064		1.67227
	1.72076		1.12409		2.06167		1.74878
	1.8027		1.15715		2.53547		1.96738
	1.89877		1.17193		2.76041		1.96738
	1.96658		1.22948		2.01653		2.16412
	1.96658		1.22948		1.97172		2.29528
	1.96658		1.24017		1.97172		2.29528
	2.04222		1.2646		1.84849		2.52949
	2.07583		1.29095		1.77455		3.437
	2.07583		1.31144		1.61963		3.08628
	2.07583		1.31144		1.60202		2.2095
	2.45822		1.36608		1.59254		1.84125
	2.45822		1.42073		1.52574		1.58631
	2.65488		1.43754		1.51165		1.32356
	2.75321		1.47537		1.41868		1.27082
	3.24485		1.57373		1.3583		1.26257
	3.44151		1.6393		1.2892		1.23379
	4.26092		1.82665		0.87632		1.14567
	4.4248		1.96716		0.690102		1.14124
	4.93237		2.45895		0.227506		1.13308
	3.94589		3.2786		0.197169		0.981999
	2.95942		3.38789		0.492921		0.883799
	2.80366		3.62053		0.739382		0.841713
	2.79501		3.35722		1.05049		0.654666
	2.46618		2.58248		1.38018		0.654666
	2.21957		2.17232		2.3003		0.459788
	1.97295		1.77735		2.04953		0.829692
	1.97295		1.53598		1.72692		0.985259
	1.82118		1.3577		1.69168		0.985259
	1.61423		0.987417		1.64469		0.985259
	1.57836		0.987417		1.28472		1.11539
	1.47971		0.937793		1.23351		1.16261
	1.47971		1.01864		1.15128		1.19639
	1.43487		1.3598		0.986811		1.24799
	1.37248		1.47702		0.904577		1.29639
	1.35288		1.54736		0.88813		1.6421
	1.34991		1.6113		0.727124		3.93534
	1.23309		1.61769		0.683177		3.44343
	0.986473		1.69584		0.634379		2.95151
	0.986473		2.78993		0.616757		2.70555
	0.870418		4.01448		0.454978		2.52375
	0.739855		4.13682		0.492892		2.50878
	0.563699		3.93983		0.704132		2.45959
	0.6324		2.46239		0.766721		2.36121
	0.772934		2.29823		0.821487		1.96767
	0.931959		2.25133		0.834125		1.8037
	1.04522		2.16691		0.896168		1.72171
	1.13508		2.10124		0.940976		1.57414
	1.28642		1.96992		0.985785		1.47575
	1.43777		1.96992		0.985785		1.34159
	1.57397		1.77292		0.985785		1.31178
	1.69918		1.75104		1.12021		1.26493
	1.74045		1.72368		1.27331		1.1806
	2.18608		1.6885		1.54029		1.14781
	3.73819		1.57593		1.70272		0.787069
	2.31974		1.53216		1.84835		0.327945
	2.29631		1.31328		1.93758		0.196901
	2.28318		1.26637				0.262534
	1.92726		1.2419				0.307657
	1.7446		1.20384				0.765724
	1.61679		1.06704				0.84386
	1.4762		0.984958				1.14859
	1.342		0.984958				1.26579
	1.31218		0.861838				1.31267
	1.27937		0.722302				1.33197
	1.23016		0.562833				1.44394
	1.23016		0.492433				1.44394
	1.19502		0.671499				1.47675
	1.17668		0.685124				1.48938
	1.15381		0.802483				1.5588
	0.984131		0.846984				1.84594
	0.984131		0.984865				2.69097
	0.984131		0.984865				1.88118
	0.843541		1.15615				1.88118
	0.738099		1.17426				1.64474
	0.738099		1.29264				1.3158
	0.702951		1.32957				1.3158
	0.688892		1.42964				1.18422
	0.562361		1.4773				0.986846
	0.317462		1.4773				0.906287
	0.246033		1.49061				0.888162
	0.430403		1.54153				0.740135
	0.80491		1.64144				0.329053
	0.819816		1.64144				0.49358
	0.894345		1.64144				0.538451
	0.983779		1.68834				0.822634
	1.13681		1.72351				0.908187
	1.18732		1.79066				0.956311
	1.21081		1.79845				0.98716
	1.31171		1.84662				1.09107
	1.34152		2.04268				1.12818
	1.36216		2.29802				1.16664
	1.63963		2.46216				1.26921
	1.67242		2.46216				1.31621
	1.72161		2.74355				1.33972
	1.72161		3.18187				1.48074
	1.82702		3.61117				1.57946
	1.96756		3.09823				1.79484
	2.04954		2.87168				1.88458
	2.16431		2.39409				1.88458
	2.33648		2.36592				1.97432
	2.39796		2.16876				1.97432
	2.8108		2.06122				2.07304
	3.73836		1.72515				2.11534
	4.42701		1.68995				2.30337
	3.78721		1.60649				2.36918
	2.70014		1.57728				2.71469
	2.41691		1.54912				3.94864
	2.30526		1.4787				1.97254
	2.17045		1.4787				1.89667
	2.16011		1.44079				1.72597
	1.92737		1.34179				1.23283
	1.5861		1.25466				1.07593
	1.4728		1.23225				0.986268
	1.433		1.16836				0.845372
	1.40267		1.1501				0.634029
	1.37462		0.985802				0.484168
	1.33891		0.896184				0.986268
	1.27643		0.896184				1.08489
	1.20006		0.795002				1.23283
	1.052		0.788642				1.56643
	1.04733		0.657201				1.64378
	1.04324		0.512617
	0.981869		0.219067
	0.911736		0.599789
	0.895234		0.630947
	0.888358		0.785178
	0.883682		0.794525
	0.78046		0.87242
	0.679756		0.883325
	0.572757		0.916041
	0.562643		0.981473
	0.984625		0.981473
	0.984625		0.981473
	1.03933		0.981473
	1.1077		0.981473
	1.14217		1.05158
	1.18155		1.15216
	1.26595		1.19179
	1.35386		1.19958
	1.3581		1.26189
	1.38743		1.30863
	1.50155		1.30863
	2.18806		1.30863
	2.40002		1.39042
	5.78934		1.4021
	2.36501		1.4276
	2.36501		1.47221
	2.16792		1.52674
	1.93686		1.5311
	1.68929		1.57036
	1.54852		1.89751
	1.40774		1.96295
	1.31389		1.96295
	1.20714		1.96295
	1.12619		2.02068
	0.985419		2.20831
	0.985419		2.20831
	0.890056		2.55183
	0.862241		2.61726
	0.766437		2.72631
	0.590539		2.94442
	0.62633		2.94442
	0.715805		3.18979
	0.861203		3.27158
	0.93243		3.36505
	1.18108		3.43515
	1.32493		4.41663
	1.34684		3.35015
	1.59938		2.2522
	1.67898		1.97068
	1.88644		1.90499
	2.07782		1.8612
	2.29654		1.82992
	4.11588		1.82992
			1.8151
			1.77361
			1.75171
			1.6675
			1.64223
			1.58511
			1.56759
			1.56012
			1.53959
			1.53713
			1.52898
			1.5228
			1.47801
			1.44011
			1.43322
			1.41643
			1.41643
			1.36432
			1.35484
			1.32511
			1.2965
			1.25407
			1.25407
			1.19278
			1.18241
			1.14956
			1.13693
			1.09482
			1.09482
			1.06113
			1.04692
			1.04008
			0.985339
			0.985339
			0.985339
			0.91965
			0.875857
			0.811456
			0.615837
			0.49267
			0.123167
			1.20137
			1.42973
			1.70376
			1.82546
			2.1297
