# Supplementary material for: A proline-rich motif on VGLUT1 reduces synaptic vesicle super-pool and spontaneous release frequency
Source: eLife journal article supplement (doi:10.7554/elife.50401), 2019-10-30
Supplement: supp [file elife-50401-supp-v1.zip › elife_poa_e50401_Figure_4_source_data_9.xlsx]

## Sheet: sham
			DIV	Code	Mutant		Leak current	Access Resistance	Membrane Resistance	Tau		At -70mV	Time (sec)	Event number	Mean Amplitude	Frequency		At 0mV	Time (sec)	Event number	Mean Amplitude	Frequency
###		Cell 10/ 17 o16 017	19	212	Lenti-sham	###	-105	-1410	-80	1.31	###	mEPSC	69	20	-11.232		###	mIPSC	69	234	19.2		###
###		Cell 11/ 17 o16 017	19	212	Lenti-sham	###	14	-1096	-30	1.62	###	mEPSC	69	151	-11.091		###	mIPSC	69	83	23.297		###
###		Cell 12/ 17 o16 019	19	212	Lenti-sham	###	-48	-1450	-77	1.91	###	mEPSC	76	74	-11.116		###	mIPSC	76	47	9.68		###
###		Cell 13/ 17 o16 021	19	212	Lenti-sham	###	-94	-1025	-66	0.95	###	mEPSC	73	159	-22.027		###	mIPSC	73	94	11.495		###
###		Cell 14/ 17 o16 021	19	212	Lenti-sham	###	-51	-1136	-46	1.59	###	mEPSC	73	25	-8.79		###	mIPSC	73	658	18.614		###
###		Cell 13/ 17 o17 017	20	212	Lenti-sham	###	68	-1247	-46	2.27	###	mEPSC	68	25	-10.92		###	mIPSC	68	911	15.8667		###
###		Cell 14/ 17 o17 017	20	212	Lenti-sham	###	-32	-957	-44	1.71	###	mEPSC	68	871	-18.717		###	mIPSC	68	1327	77.532		###
###		Cell 15/ 17 o17 019	20	212	Lenti-sham	###	-26	-1286	-54	2.66	###	mEPSC	25	5	-11.88		###	mIPSC	66	514	15.017		###
###		Cell 16/ 17 o17 021	20	212	Lenti-sham	###	-14	-1091	-42	2.13	###	mEPSC	55	108	-14.307		###	mIPSC	55	314	16.17		###
###		Cell 8/ 17 o18 009	21	212	Lenti-sham	###	-58	-1240	-53	1.08	###	mEPSC	50	47	-20.688		###	mIPSC	50	181	30.463		###
###		Cell 9/ 17 o18 009	21	212	Lenti-sham	###	28	-1209	-50	2.49	###	mEPSC	50	2	-9.236		###	mIPSC	50	396	16.268		###
###		Cell 10/ 17 o18 011	21	212	Lenti-sham	###	-80	-1065	-87	2.47	###	mEPSC	34	5	-8.93		###	mIPSC	34	63	12.512		###
###		Cell 11/ 17 o18 013	21	212	Lenti-sham	###	-15	-1243	-43	1.88	###	mEPSC	69	27	-10.507		###	mIPSC	69	1	13.35		###
###		Cell 12/ 17 o18 013	21	212	Lenti-sham	###	-97	-1070	-61	2.69	###	mEPSC	30	135	-10.543		###	mIPSC	57	1	8.72		###
###		Cell 11/ 17 o21 013	17	212	Lenti-sham	###	2	-1145	-32	1.42727	###	mEPSC	62	6	-9.15	0.0967742	###	mIPSC	62	420	14.246	6.77419	###
###		Cell 12/ 17 o21 015	17	212	Lenti-sham	###	12	-1205	-30	1.75128	###	mEPSC	73	52	-13.501	0.712329	###	mIPSC	73	36	17.754	0.493151	###
###		Cell 1/ 17 o22 003	18	212	Lenti-sham	###	-80	-650	-55	0.75426	###	mEPSC	63	382	-25.231	6.06349	###	mIPSC	82	648	17.725	7.90244	###
###		Cell 2/ 17 o22 003	18	212	Lenti-sham	###	-110	-1045	-45	0.718711	###	mEPSC	33	98	-14.88	2.9697	###	mIPSC	82	618	18.716	7.53659	###
###		Cell 3/ 17 o22 005	18	212	Lenti-sham	###	-108	-1089	-39	1.02592	###	mEPSC	18	25	-11.535	1.38889	###	mIPSC	49	23	13.817	0.469388	###
###		Cell 4/ 17 o22 007	18	212	Lenti-sham	###	-70	-1302	-43	1.11849	###	mEPSC	72	100	-11.368	1.38889	###	mIPSC	23	286	20.775	12.4348	###
###		Cell 5/ 17 o22 007	18	212	Lenti-sham	###	-10	-1038	-90	1.85668	###	mEPSC	72	449	-22.608	6.23611	###	mIPSC	23	359	27.448	15.6087	###
###		Cell 11/ 17 o23 015	19	212	Lenti-sham	###	-25	-787	-38	1.64	###	mEPSC	43	50	-16.339	1.16279	###	mIPSC	77	695	18.426	9.02597	###
###		Cell 12/ 17 o23 015	19	212	Lenti-sham	###	-10	-1252	-34	1.33	###	mEPSC	77	5	-9.445	0.0649351	###	mIPSC	77	655	17.794	8.50649	###
###		Cell 13/ 17 o23 017	19	212	Lenti-sham	###	-30	-1145	-39	2.15	###	mEPSC	63	28	-11.334	0.444444	###	mIPSC	63	93	13.603	1.47619	###
###		Cell 14/ 17 o23 017	19	212	Lenti-sham	###	8	-913	-20	1.5	###	mEPSC	12	7	-8.262	0.583333	###	mIPSC	63	104	14.68	1.65079	###
###		Cell 15/ 17 o23 019	19	212	Lenti-sham	###	-143	-605	-53	1.94	###	mEPSC	61	584	-21.008	9.57377	###	mIPSC	61	591	16.298	9.68852	###
###		Cell 16/ 17 o23 019	19	212	Lenti-sham	###	-128	-982	-46	1.89	###	mEPSC	20	44	-9.304	2.2	###	mIPSC	61	390	17.155	6.39344	###
###		Cell 1/ 17 o24 001	20	212	Lenti-sham	###	7	-1086	-25	2.17	###	mEPSC	62	242	-11.93	3.90323	###	mIPSC	62	209	18.125	3.37097	###
###		Cell 2/ 17 o24 003	20	212	Lenti-sham	###	-196	-822	-58	2.62	###	mEPSC	70	8	-6.83	0.114286	###	mIPSC	70	840	14.294	12	###
###		Cell 3/ 17 o24 003	20	212	Lenti-sham	###	-15	-515	-38	1.11	###	mEPSC	41	35	-9.476	0.853659	###	mIPSC	70	1212	29.356	17.3143	###
###		Cell 4/ 17 o24 005	20	212	Lenti-sham	###	-18	-1122	-25	1.81	###	mEPSC	64	29	-19.156	0.453125	###	mIPSC	64	121	14.64	1.89062	###
###		Cell 5/ 17 o24 005	20	212	Lenti-sham	###	25	-964	-26	2.02	###	mEPSC	27	12	-10.585	0.444444	###	mIPSC	64	148	14.254	2.3125	###
###		Cell 12/ 17 o25 014	21	212	Lenti-sham	###	0	-1098	-40	2.05	###	mEPSC	71	67	-7.88	0.943662	###	mIPSC	71	342	17.391	4.8169	###
###		Cell 13/ 17 o25 014	21	212	Lenti-sham	###	-13	-832	-30	1.24	###	mEPSC	71	19	-10.67	0.267606	###	mIPSC	71	227	18.19	3.19718	###
###		Cell 14/ 17 o25 017	21	212	Lenti-sham	###	-112	-1155	-48	1.47	###	mEPSC	62	58	-9.151	0.935484	###	mIPSC	62	127	16.55	2.04839	###
###		Cell 15/ 17 o25 019	21	212	Lenti-sham	###	-11	-1276	-30	2	###	mEPSC	64	21	-18.94	0.328125	###	mIPSC	64	198	15.78	3.09375	###
###		Cell 13/ 17 n04 021	17	212	Lenti-sham	###	-220	1145	-55	0.49067	###	mEPSC	48	9	-8.377	0.1875	###	mIPSC	207	1194	19.899	5.76812	###
###		Cell 14/ 17 n04 023	17	212	Lenti-sham	###	-146	-857	-50	0.877577	###	mEPSC	33	130	-9.2	3.93939	###	mIPSC	54	389	14.804	7.2037	###
###		Cell 1/ 17 n05 003	18	212	Lenti-sham	###	-42	-1020	-45	0.872375	###	mEPSC	68	497	-12.749	7.30882	###	mIPSC	73	1088	31.53	14.9041	###
###		Cell 2/ 17 n05 006	18	212	Lenti-sham	###	-83	-905	-40	0.580168	###	mEPSC	58	37	-13.88	0.637931	###	mIPSC	58	0	--	0	###
###		Cell 10/ 17 n06 018	19	212	Lenti-sham	###	-46	-1012	-30	0.810069	###	mEPSC	51	31	-8.001	0.607843	###	mIPSC	88	992	20.399	11.2727	###
###		Cell 11/ 17 n06 021	19	212	Lenti-sham	###	-80	-668	-22	0.921492	###	mEPSC	30	168	-14.039	5.6	###	mIPSC	71	613	23.447	8.6338	###
###		Cell 12/ 17 n06 023	19	212	Lenti-sham	###	-165	-695	-37	0.604366	###	mEPSC	15	10	-9.029	0.666667	###	mIPSC	51	282	13.554	5.52941	###
###		Cell 13/ 17 n06 023	19	212	Lenti-sham	###	-15	-792	-16	0.559369	###	mEPSC	51	66	-9.145	1.29412	###	mIPSC	51	289	25.206	5.66667	###
###		Cell 14/ 17 n06 025	19	212	Lenti-sham	###	-95	-1402	-42	1.35236	###	mEPSC	56	86	-13.483	1.53571	###	mIPSC	56	104	14.984	1.85714	###
###		Cell 1/ 17 n07 001	20	212	Lenti-sham	###	-28	-890	-20	0.832081	###	mEPSC	--	--		--	###	mIPSC	85	840	18.734	9.88235	###
###		Cell 2/ 17 n07 001	20	212	Lenti-sham	###	-30	-1115	-35	0.555887	###	mEPSC	57	222	-39.515	3.89474	###	mIPSC	85	122	16.1478	1.43529	###
###		Cell 3/ 17 n07 003	20	212	Lenti-sham	###	-95	-965	-35	0.0984456	###	mEPSC	50	7	-9.418	0.14	###	mIPSC	58	15	13.197	0.258621	###
###		Cell 4/ 17 n07 003	20	212	Lenti-sham	###	-27	-1025	-30	0.0263415	###	mEPSC	50	25	-8.154	0.5	###	mIPSC	58	307	20.997	5.2931	###
###		Cell 5/ 17 n07 005	20	212	Lenti-sham	###	-140	-870	-35	0.992268	###	mEPSC	14	12	-7.944	0.857143	###	mIPSC	66	158	17.338	2.39394	###
###		Cell 3/ 17 n08 007	21	212	Lenti-sham	###	-75	-950	-30	0.62929	###	mEPSC	88	330	-11.885	3.75	###	mIPSC	88	1059	35.564	12.0341	###
###		Cell 4/ 17 n08 007	21	212	Lenti-sham	###	-45	-985	-35	0.986336	###	mEPSC	88	338	-9.694	3.84091	###	mIPSC	88	1215	23.62	13.8068	###
###		Cell 5/ 17 n08 010	21	212	Lenti-sham	###	-90	-940	-40	1.11747	###	mEPSC	32	180	-11.902	5.625	###	mIPSC	98	562	18.045	5.73469	###
###		Cell 6/ 17 n08 010	21	212	Lenti-sham	###	-255	-810	-50	0.723184	###	mEPSC	32	96	-9.547	3	###	mIPSC	98	911	19.937	9.29592	###
###	#######	##############	##############	##############	##############	##############	##############	##############	##############	##############	##############	##############	##############	##############	##############	##############	##############	#######	##############	##############	##############	##############	###

## Sheet: WT
			DIV	Code	Mutant		Leak current	Access Resistance	Membrane Resistance	Tau		At -70mV	Time (sec)	Event number	Mean Amplitude	Frequency		At 0mV	Time (sec)	Event number	Mean Amplitude	Frequency
###		Cell 6/ 17 o16 011	19	T	Lenti-WT	###	-168	-1195	-62	1.81	###	mEPSC	63	330	-14.17		###	mIPSC	63	431	30.16		###
###		Cell 7/ 17 o16 011	19	T	Lenti-WT	###	-3	-903	-23	1.37	###	mEPSC	63	129	-11.93		###	mIPSC	63	746	32.57		###
###		Cell 8/ 17 o16 013	19	T	Lenti-WT	###	-45	-1184	-44	1.91	###	mEPSC	69	114	-13.092		###	mIPSC	69	358	21.23		###
###		Cell 9/ 17 o16 015	19	T	Lenti-WT	###	-144	-1371	-40	1.62	###	mEPSC	51	108	-15.78		###	mIPSC	38	471	13.27		###
###		Cell 7/ 17 o17 011	20	T	Lenti-WT	###	-107	-1142	-43	1.33	###	mEPSC	78	169	-13.146		###	mIPSC	78	447	31.496		###
###		Cell 8/ 17 o17 011	20	T	Lenti-WT	###	5	-1063	-34	2	###	mEPSC	78	229	-24.171		###	mIPSC	78	489	19.992		###
###		Cell 9/ 17 o17 013	20	T	Lenti-WT	###	-86	-853	-50	1.12	###	mEPSC	27	748	-21.597		###	mIPSC	51	166	21.066		###
###		Cell 10/ 17 o17 013	20	T	Lenti-WT	###	-37	-1161	-36	2.02	###	mEPSC	55	476	-16.039		###	mIPSC	51	607	25.78		###
###		Cell 11/ 17 o17 015	20	T	Lenti-WT	###	-51	-1400	-46	2	###	mEPSC	67	388	-14.206		###	mIPSC	67	1115	32.484		###
###		Cell 12/ 17 o17 015	20	T	Lenti-WT	###	-22	-902	-28	1.8	###	mEPSC	67	386	-15.813		###	mIPSC	67	756	24.298		###
###		Cell 1/ 17 o18 001	21	T	Lenti-WT	###	-5	-1257	-44	2.35	###	mEPSC	61	13	-13.377		###	mIPSC	61	253	10.021		###
###		Cell 2/ 17 o18 001	21	T	Lenti-WT	###	1	-861	-49	1.49	###	mEPSC	61	82	-11.857		###	mIPSC	61	1133	45.626		###
###		Cell 3/ 17 o18 003	21	T	Lenti-WT	###	-105	-916	-72	1.44	###	mEPSC	61	173	-19.124		###	mIPSC	61	331	22.243		###
###		Cell 4/ 17 o18 003	21	T	Lenti-WT	###	-255	-1103	-43	1.73	###	mEPSC	61	68	-7.127		###	mIPSC	61	186	16.275		###
###		Cell 5/ 17 o18 005	21	T	Lenti-WT	###	-21	-1001	-20	1.6	###	mEPSC	51	72	-11.008		###	mIPSC	51	78	27.583		###
###		Cell 6/ 17 o18 007	21	T	Lenti-WT	###	-49	-849	-40	1.77	###	mEPSC	62	30	-13.064		###	mIPSC	62	81	14.56		###
###		Cell 7/ 17 o18 007	21	T	Lenti-WT	###	12	-921	-41	1.87	###	mEPSC	62	77	-11.571		###	mIPSC	62	448	16.76		###
###		Cell 7/ 17 o21 007	17	T	Lenti-WT	###	-25	-722	-33	1.36171	###	mEPSC	77	151	-16.66	1.96104	###	mIPSC	83	12	16.714	0.144578	###
###		Cell 8/ 17 o21 009	17	T	Lenti-WT	###	-90	-925	-62	1.42639	###	mEPSC	50	166	-28.239	3.32	###	mIPSC	68	193	16.738	2.83824	###
###		Cell 9/ 17 o21 011	17	T	Lenti-WT	###	-48	-967	-22	0.939511	###	mEPSC	61	249	-11.934	4.08197	###	mIPSC	69	509	15.185	7.37681	###
###		Cell 10/ 17 o21 011	17	T	Lenti-WT	###	-90	-1111	-50	1.1339	###	mEPSC	61	205	-15.429	3.36066	###	mIPSC	69	657	18.726	9.52174	###
###		Cell 13/ 17 o22 022	18	T	Lenti-WT	###	-2	-1302	-35	1.14666	###	mEPSC	65	86	-13.392	1.32308	###	mIPSC	65	159	15.318	2.44615	###
###		Cell 14/ 17 o22 022	18	T	Lenti-WT	###	-90	-1102	-48	1.21201	###	mEPSC	65	45	-10.31	0.692308	###	mIPSC	65	153	19.031	2.35385	###
###		Cell 15/ 17 o22 024	18	T	Lenti-WT	###	-90	-1075	-25	1.62502	###	mEPSC	58	175	-21.729	3.01724	###	mIPSC	58	100	13.421	1.72414	###
###		Cell 16/ 17 o22 026	18	T	Lenti-WT	###	-80	-982	-40	0.944726	###	mEPSC	52	46	-12.801	0.884615	###	mIPSC	52	86	22.544	1.65385	###
###		Cell 6/ 17 o23 009	19	T	Lenti-WT	###	-42	-1254	-57	1.58	###	mEPSC	62	91	-20.28	1.46774	###	mIPSC	62	48	16.66	0.774194	###
###		Cell 7/ 17 o23 009	19	T	Lenti-WT	###	-10	-915	-23	1.58	###	mEPSC	62	323	-10.452	5.20968	###	mIPSC	62	41	16.75	0.66129	###
###		Cell 8/ 17 o23 011	19	T	Lenti-WT	###	-96	-840	-56	1.17	###	mEPSC	26	84	-54.19	3.23077	###	mIPSC	26	266	31.03	10.2308	###
###		Cell 9/ 17 o23 011	19	T	Lenti-WT	###	-6	-903	-27	1.35	###	mEPSC	26	35	-11.97	1.34615	###	mIPSC	26	212	17.57	8.15385	###
###		Cell 10/ 17 o23 013	19	T	Lenti-WT	###	-288	-982	-78	1.29	###	mEPSC	16	160	-10.213	10	###	mIPSC	64	1237	31.72	19.3281	###
###		Cell 15/ 17 o24 025	20	T	Lenti-WT	###	-32	-1057	-34	1.06	###	mEPSC	38	281	-19.726	7.39474	###	mIPSC	38	632	38.535	16.6316	###
###		Cell 16/ 17 o24 025	20	T	Lenti-WT	###	-68	-916	-70	1.42	###	mEPSC	38	144	-25.724	3.78947	###	mIPSC	38	144	17.6	3.78947	###
###		Cell 17/ 17 o24 027	20	T	Lenti-WT	###	-386	-1197	-81	1.4	###	mEPSC	36	265	-12.38	7.36111	###	mIPSC	36	34	14.07	0.944444	###
###		Cell 18/ 17 o24 029	20	T	Lenti-WT	###	-83	-861	-48	1.27	###	mEPSC	19	65	-9.843	3.42105	###	mIPSC	65	320	14.133	4.92308	###
###		Cell 1/ 17 o25 001	21	T	Lenti-WT	###	-39	-1237	-39	1.98	###	mEPSC	55	124	-10.891	2.25455	###	mIPSC	55	796	17.127	14.4727	###
###		Cell 2/ 17 o25 001	21	T	Lenti-WT	###	0	-905	-74	1.89	###	mEPSC	55	729	-20.481	13.2545	###	mIPSC	55	1003	40.69	18.2364	###
###		Cell 3/ 17 o25 003	21	T	Lenti-WT	###	-121	-1024	-48	2.23	###	mEPSC	34	279	-15.319	8.20588	###	mIPSC	55	77	13.254	1.4	###
###		Cell 4/ 17 o25 003	21	T	Lenti-WT	###	-27	-958	-41	2.35	###	mEPSC	55	77	-10.07	1.4	###	mIPSC	55	200	18.37	3.63636	###
###		Cell 5/ 17 o25 005	21	T	Lenti-WT	###	-365	-1469	-95	1.73	###	mEPSC	16	32	-8.61	2	###	mIPSC	149	51	13.36	2.92157	###
###		Cell 6/ 17 o25 005	21	T	Lenti-WT	###	-11	-1062	-48	2.02	###	mEPSC	51	21	-10.1	0.411765	###	mIPSC	404	51	13.53	7.92157	###
###		Cell 5/ 17 n04 008	17	T	Lenti-WT	###	-400	-922	-80	0.760253	###	mEPSC	30	286	-19.581	9.53333	###	mIPSC	161	826	18.041	5.13043	###
###		Cell 6/ 17 n04 008	17	T	Lenti-WT	###	-75	-1021	-60	1.08475	###	mEPSC	30	805	-37.865	26.8333	###	mIPSC	161	1572	25.364	9.76398	###
###		Cell 7/ 17 n04 010	17	T	Lenti-WT	###	-125	-898	-40	0.790935	###	mEPSC	35	540	-14.16	15.4286	###	mIPSC	60	496	30.157	8.26667	###
###		Cell 8/ 17 n04 010	17	T	Lenti-WT	###	-220	-948	-50	1.0482	###	mEPSC	35	373	-16.17	10.6571	###	mIPSC	60	693	23.21	11.55	###
###		Cell 6/ 17 n05 019	18	T	Lenti-WT	###	-55	-885	-75	0.827308	###	mEPSC	64	1968	-21.731	30.75	###	mIPSC	55	717	34.54	13.0364	###
###		Cell 7/ 17 n05 019	18	T	Lenti-WT	###	1	-975	-21	0.911689	###	mEPSC	62	382	-9.43	6.16129	###	mIPSC	55	792	28.77	14.4	###
###		Cell 8/ 17 n05 022	18	T	Lenti-WT	###	-90	-970	-55	0.978364	###	mEPSC	49	333	-16.61	6.79592	###	mIPSC	59	3	missing	0.0508475	###
###		Cell 9/ 17 n05 024	18	T	Lenti-WT	###	-90	-727	-30	1.143	###	mEPSC	71	324	-10.76	4.56338	###	mIPSC	72	403	22.574	5.59722	###
###		Cell 1/ 17 n06 001	19	T	Lenti-WT	###	-42	-980	-25	0.690868	###	mEPSC	62	32	-14.491	0.516129	###	mIPSC	53	440	14.462	8.30189	###
###		Cell 2/ 17 n06 001	19	T	Lenti-WT	###	-16	-560	-42	0.772847	###	mEPSC	62	113	-29.99	1.82258	###	mIPSC	53	162	14.667	3.0566	###
###		Cell 3/ 17 n06 003	19	T	Lenti-WT	###	-16	-740	-55	1.10758	###	mEPSC	44	162	-14.363	3.68182	###	mIPSC	62	644	20.453	10.3871	###
###		Cell 4/ 17 n06 003	19	T	Lenti-WT	###	-3	-945	-25	0.923765	###	mEPSC	44	80	-9.67	1.81818	###	mIPSC	62	273	16.76	4.40323	###
###		Cell 5/ 17 n06 006	19	T	Lenti-WT	###	-30	-1027	-30	1.16156	###	mEPSC	54	66	-14.782	1.22222	###	mIPSC	54	410	18.123	7.59259	###
###		Cell 16/ 17 n07 024	20	T	Lenti-WT	###	-120	-1030	-45	1.46752	###	mEPSC	65	944	-11.947	14.5231	###	mIPSC	65	1180	34.826	18.1538	###
###		Cell 17/ 17 n07 026	20	T	Lenti-WT	###	-150	-915	-35	0.592353	###	mEPSC	59	94	-14.198	1.59322	###	mIPSC	72	54	18.282	0.75	###
###		Cell 18/ 17 n07 026	20	T	Lenti-WT	###	-75	-810	-35	1.14599	###	mEPSC	59	190	-11.915	3.22034	###	mIPSC	72	369	21.416	5.125	###
###		Cell 19/ 17 n07 030	20	T	Lenti-WT	###	-120	-875	-30	0.881612	###	mEPSC	16	111	-12.008	6.9375	###	mIPSC	66	556	20.511	8.42424	###
###		Cell 1/ 17 n08 003	21	T	Lenti-WT	###	-82	-862	-37	1.81506	###	mEPSC	22	17	-7.719	0.772727	###	mIPSC	72	421	17.032	5.84722	###
###		Cell 2/ 17 n08 005	21	T	Lenti-WT	###	-70	-878	-26	0.472518	###	mEPSC	30	27	-10.557	0.9	###	mIPSC	85	117	27.209	1.37647	###

## Sheet: P554A
			DIV	Code	Mutant		Leak current	Access Resistance	Membrane Resistance	Tau		At -70mV	Time (sec)	Event number	Mean Amplitude	Frequency		At 0mV	Time (sec)	Event number	Mean Amplitude	Frequency
###	9/27/17	Cell 2/ 17 o16 005	19	A	Lenti-P554A	###	-106	-919	-85	1.96	###	mEPSC	109	97	-7.96		###	mIPSC	109	451	15.33		###
###		Cell 3/ 17 o16 005	19	A	Lenti-P554A	###	25	-1074	-65	2.2	###	mEPSC	109	221	-8.827		###	mIPSC	109	378	13.644		###
###		Cell 4/ 17 o16 007	19	A	Lenti-P554A	###	-20	-1404	-50	2.1	###	mEPSC	76	1511	-20.61		###	mIPSC	76	573	17.357		###
###		Cell 5/ 17 o16 009	19	A	Lenti-P554A	###	-55	-1036	-36	1.54	###	mEPSC	73	111	-9.059		###	mIPSC	73	658	22.622		###
###		Cell 1/ 17 o17 001	20	A	Lenti-P554A	###	-151	-1353	-44	1.94	###	mEPSC	57	64	-11.46		###	mIPSC	57	475	17.147		###
###		Cell 2/ 17 o17 001	20	A	Lenti-P554A	###	-196	-1167	-40	1.08	###	mEPSC	57	176	-10.191		###	mIPSC	57	379	21.66		###
###		Cell 3/ 17 o17 004	20	A	Lenti-P554A	###	-65	-1036	-24	1.57	###	mEPSC	61	272	-11.442		###	mIPSC	61	219	18.498		###
###		Cell 4/ 17 o17 007	20	A	Lenti-P554A	###	-27	-978	-39	1.45	###	mEPSC	55	11	-10.6		###	mIPSC	55	4	20.407		###
###		Cell 5/ 17 o17 009	20	A	Lenti-P554A	###	-56	-1184	-78	1.78	###	mEPSC	53	44	-14.312		###	mIPSC	30	293	16.757		###
###		Cell 6/ 17 o17 009	20	A	Lenti-P554A	###	-58	-916	-49	0.97	###	mEPSC	53	81	-21.976		###	mIPSC	30	16	14.235		###
###		Cell 17/ 17 o18 021	21	A	Lenti-P554A	###	-79	-1344	-89	1.8	###	mEPSC	58	129	-10.78		###	mIPSC	58	796	20.831		###
###		Cell 18/ 17 o18 021	21	A	Lenti-P554A	###	11	-1144	-50	1.97	###	mEPSC	58	715	-21.244		###	mIPSC	58	397	21.576		###
###		Cell 19/ 17 o18 023	21	A	Lenti-P554A	###	-65	-1421	-70	2.68	###	mEPSC	35	208	-12.53		###	mIPSC	35	334	16.693		###
###		Cell 20/ 17 o18 025	21	A	Lenti-P554A	###	-356	-864	-86	1.75	###	mEPSC	12	101	-11.414		###	mIPSC	36	22	9.925		###
###	2017-04-10	Cell 1/ 17 o21 001	17	A	Lenti-P554A	###	-140	-975	-45	0.584198	###	mEPSC	61	109	-11.549	1.78689	###	mIPSC	61	236	19.727	3.86885	###
###		Cell 2/ 17 o21 001	17	A	Lenti-P554A	###	-25	-879	-30	1.09217	###	mEPSC	61	112	-10.568	1.83607	###	mIPSC	61	323	18.982	5.29508	###
###		Cell 3/ 17 o21 003	17	A	Lenti-P554A	###	-170	-1195	-55	1.15316	###	mEPSC	75	424	-11.496	5.65333	###	mIPSC	51	661	20.739	12.9608	###
###		Cell 4/ 17 o21 003	17	A	Lenti-P554A	###	-12	-953	-70	0.932078	###	mEPSC	75	830	-17.48	11.0667	###	mIPSC	51	882	35.238	17.2941	###
###		Cell 5/ 17 o21 005	17	A	Lenti-P554A	###	-243	-845	-60	1.39358	###	mEPSC	76	262	-11.652	3.44737	###	mIPSC	73	136	12.172	1.86301	###
###		Cell 6/ 17 o21 005	17	A	Lenti-P554A	###	-40	-1080	-35	0.989648	###	mEPSC	76	216	-15.851	2.84211	###	mIPSC	71	193	17.421	2.71831	###
###		Cell 17/ 17 o22 028	18	A	Lenti-P554A	###	-150	-902	-100	1.26422	###	mEPSC	48	1468	-32.268	30.5833	###	mIPSC	48	526	22.332	10.9583	###
###		Cell 18/ 17 o22 030	18	A	Lenti-P554A	###	-92	-810	-80	2.19928	###	mEPSC	26	560	-40.64	21.5385	###	mIPSC	10	75	26.803	7.5	###
###		Cell 19/ 17 o22 032	18	A	Lenti-P554A	###	-82	-860	-75	1.17309	###	mEPSC	65	409	-22.611	6.29231	###	mIPSC	80	875	21.903	10.9375	###
###		Cell 1/ 17 o23 001	19	A	Lenti-P554A	###	-37	-721	-27	0.69	###	mEPSC	32	36	-30.194	1.125	###	mIPSC	68	159	20.104	2.33824	###
###		Cell 2/ 17 o23 001	19	A	Lenti-P554A	###	12	-868	-17	1.86	###	mEPSC	68	1370	-18.937	20.1471	###	mIPSC	68	947	17.357	13.9265	###
###		Cell 3/ 17 o23 003	19	A	Lenti-P554A	###	-9	-1219	-33	2	###	mEPSC	42	220	-12.902	5.2381	###	mIPSC	42	344	16.026	8.19048	###
###		Cell 4/ 17 o23 005	19	A	Lenti-P554A	###	-20	-919	-18	1.62	###	mEPSC	65	615	-11.11	9.46154	###	mIPSC	65	47	13.894	0.723077	###
###		Cell 5/ 17 o23 007	19	A	Lenti-P554A	###	-8	-1005	-26	1.34	###	mEPSC	38	87	-16.833	2.28947	###	mIPSC	38	433	21.442	11.3947	###
###		Cell 19/ 17 o24 031	20	A	Lenti-P554A	###	-21	-980	-38	1.38	###	mEPSC	67	366	-23.468	5.46269	###	mIPSC	67	467	19.2	6.97015	###
###		Cell 20/ 17 o24 033	20	A	Lenti-P554A	###	-130	-844	-103	1.4	###	mEPSC	62	1285	-35.203	20.7258	###	mIPSC	62	659	22.492	10.629	###
###		Cell 21/ 17 o24 035	20	A	Lenti-P554A	###	-314	-1085	-80	1.78	###	mEPSC	38	116	-8.906	3.05263	###	mIPSC	38	202	15.04	5.31579	###
###		Cell 22/ 17 o24 035	20	A	Lenti-P554A	###	-288	-1096	-94	1.61	###	mEPSC	24	226	-14.762	9.41667	###	mIPSC	40	45	9.375	1.125	###
###		Cell 7/ 17 o25 007	21	A	Lenti-P554A	###	-90	-1505	-72	2.35	###	mEPSC	51	99	-10.82	1.94118	###	mIPSC	51	456	15.08	8.94118	###
###		Cell 8/ 17 o25 007	21	A	Lenti-P554A	###	-14	-922	-36	1.71	###	mEPSC	51	204	-10.345	4	###	mIPSC	51	468	20.67	9.17647	###
###		Cell 9/ 17 o25 010	21	A	Lenti-P554A	###	-212	-881	-84	1.92	###	mEPSC	28	351	-25.47	12.5357	###	mIPSC	28	115	14.8	4.10714	###
###		Cell 10/ 17 o25 012	21	A	Lenti-P554A	###	-86	-978	-33	1.3	###	mEPSC	43	151	-12.47	3.51163	###	mIPSC	43	345	21.87	8.02326	###
###		Cell 11/ 17 o25 012	21	A	Lenti-P554A	###	-361	-783	-70	1.79	###	mEPSC	17	71	-9.52	4.17647	###	mIPSC	43	190	13.79	4.4186	###
###	10/18/17	Cell 1/ 17 n04 001	17	A	Lenti-P554A	###	-320	-690	-55	0.88	###	mEPSC	30	228	-9.497	7.6	###	mIPSC	229	2693	29.222	11.7598	###
###		Cell 2/ 17 n04 003	17	A	Lenti-P554A	###	-62	-1096	-30	0.8	###	mEPSC	63	108	-13.928	1.71429	###	mIPSC	80	22	22.004	0.275	###
###		Cell 3/ 17 n04 006	17	A	Lenti-P554A	###	-81	-778	-25	0.837847	###	mEPSC					###	mIPSC	70	844	22.624	12.0571	###
###		Cell 4/ 17 n04 006	17	A	Lenti-P554A	###	-128	-1075	-40	0.747595	###	mEPSC					###	mIPSC	70	759	17.943	10.8429	###
###		Cell 10/ 17 n05 026	18	A	Lenti-P554A	###	-41	1065	-25	0.795106	###	mEPSC	56	341	-12.274	6.08929	###	mIPSC	137	1761	20.013	12.854	###
###		Cell 11/ 17 n05 026	18	A	Lenti-P554A	###	18	-870	-20	0.872214	###	mEPSC	56	190	-9.553	3.39286	###	mIPSC	137	2167	24.963	15.8175	###
###		Cell 12/ 17 n05 029	18	A	Lenti-P554A	###	-85	-1045	-40	1.06331	###	mEPSC	30	387	-18.19	12.9	###	mIPSC	65	212	14.69	3.26154	###
###		Cell 13/ 17 n05 029	18	A	Lenti-P554A	###	-80	-802	-40	1.2228	###	mEPSC	30	353	-15.717	11.7667	###	mIPSC	65	396	19.799	6.09231	###
###		Cell 15/ 17 n06 030	19	A	Lenti-P554A	###	-90	-752	-65	0.964206	###	mEPSC	40	922	-32.122	23.05	###	mIPSC	40	481	43.036	12.025	###
###		Cell 16/ 17 n06 033	19	A	Lenti-P554A	###	-52	-775	-28	1.35999	###	mEPSC	67	597	-9.657	8.91045	###	mIPSC	65	766	17.874	11.7846	###
###		Cell 11/ 17 n07 015	20	A	Lenti-P554A	###	-30	-742	-21	0.593655	###	mEPSC	86	43	-10.683	0.5	###	mIPSC	86	417	13.635	4.84884	###
###		Cell 12/ 17 n07 019	20	A	Lenti-P554A	###	-58	-960	-35	0.0604167	###	mEPSC	59	173	-12.454	2.9322	###	mIPSC	88	97	14.926	1.10227	###
###		Cell 13/ 17 n07 019	20	A	Lenti-P554A	###	-25	-900	-24	0.0277778	###	mEPSC	59	650	-13.249	11.0169	###	mIPSC	88	85	18.383	0.965909	###
###		Cell 14/ 17 n07 021	20	A	Lenti-P554A	###	-158	-890	-50	0.873267	###	mEPSC	18	93	5.16667	-9.836	###	mIPSC	58	805	20.246	13.8793	###
###		Cell 15/ 17 n07 021	20	A	Lenti-P554A	###	-166	-815	-40	0.777782	###	mEPSC	35	750	21.4286	-16.002	###	mIPSC	58	647	16.427	11.1552	###
###		Cell 11/ 17 n08 019	21	A	Lenti-P554A	###	-125	-752	-48	1.00159	###	mEPSC	106	1416	-19.023	13.3585	###	mIPSC	94	149	28.998	1.58511	###
###		Cell 12/ 17 n08 019	21	A	Lenti-P554A	###	12	-942	-55	0.775177	###	mEPSC	106	864	-13.195	8.15094	###	mIPSC	94	768	19.916	8.17021	###
###		Cell 13/ 17 n08 022	21	A	Lenti-P554A	###	-65	-828	-20	1.34309	###	mEPSC	77	98	-13.546	1.27273	###	mIPSC	56	33	10.275	0.589286	###
