# Supplementary material for: A proline-rich motif on VGLUT1 reduces synaptic vesicle super-pool and spontaneous release frequency
Source: eLife journal article supplement (doi:10.7554/elife.50401), 2019-10-30
Supplement: supp [file elife-50401-supp-v1.zip › elife_poa_e50401_Figure_5_source_data_1.xlsx]

## Sheet: sham-0520-CS1
			Raw Data
	Time_(sec)	Roi1	Roi2	Ref_fluo	Background
1	0	502655	555569	93225721	36325550
2	30	507915	543900	9.24582e+07	3.62605e+07
3	60	499821	542120	9.24114e+07	3.63295e+07
4	90	503141	562864	9.24514e+07	3.64396e+07
5	120	504294	554279	9.20694e+07	3.64417e+07
6	150	499057	561347	9.27166e+07	3.63633e+07
7	180	504415	556822	9.25304e+07	3.63528e+07
8	210	475158	503143	9.28107e+07	3.6466e+07
9	240	472052	514967	9.26283e+07	3.64029e+07
10	270	474707	517061	9.27869e+07	3.64397e+07
11	300	475521	513331	9.23185e+07	3.61387e+07
12	330	474518	519614	9.32337e+07	3.65389e+07
13	360	473107	512463	9.30687e+07	3.64649e+07
14	390	472076	516376	9.32297e+07	3.65397e+07
15	690	472053	513363	9.31615e+07	3.618e+07
16	990	474883	531380	9.45472e+07	3.64456e+07
17	1290	486646	534659	9.44106e+07	3.6241e+07
18	1590	483621	553754	9.56591e+07	3.64821e+07
19	1890	488190	545622	9.51025e+07	3.63906e+07
20	2190	487478	565424	9.58054e+07	3.66196e+07
21	2490	503119	570514	9.56472e+07	3.64807e+07
22	2790	507742	548424	9.53077e+07	3.63715e+07
23	3090	510337	541874	9.56285e+07	3.6455e+07
24	3390	507033	558912	9.54459e+07	3.63086e+07
25	3690	504298	543876	9.61791e+07	3.64784e+07
26	3990	503100	543571	9.57824e+07	3.63077e+07
27	4290	500519	544278	9.546e+07	3.63191e+07
28	4590	499733	553424	9.57849e+07	3.64129e+07
		Background corrected Data
	Time_(sec)	Roi1-bkgd-corr	Roi2-bkgd-corr	Ref_fluo-bkgd-corr
1	0	77439.5	130354	1.94432e+07
2	30	83461.3	119447	1.88079e+07
3	60	74559.9	116858	1.8621e+07
4	90	76589.9	136313	1.84372e+07
5	120	77719	127704	1.80511e+07
6	150	73399.5	135689	1.88574e+07
7	180	78881.2	131287	1.86927e+07
8	210	48298.3	76284	1.8743e+07
9	240	45931.3	88846.7	1.86888e+07
10	270	48155.5	90510.3	1.87726e+07
11	300	52492.9	90302.8	1.89156e+07
12	330	46805.6	91901.3	1.90179e+07
13	360	46260.6	85616.7	1.90033e+07
14	390	44354.1	88654.1	1.90123e+07
15	690	48541.3	89850.8	1.96746e+07
16	990	48261.3	104758	2.05208e+07
17	1290	62420.7	110433	2.07999e+07
18	1590	56573.8	126707	2.15588e+07
19	1890	62213.4	119645	2.1188e+07
20	2190	58820.4	136766	2.14257e+07
21	2490	76087.4	143483	2.15497e+07
22	2790	81988.5	122670	2.14318e+07
23	3090	83605.7	115143	2.1583e+07
24	3390	82015.8	133894	2.16978e+07
25	3690	77293.5	116872	2.20863e+07
26	3990	78093.3	118564	2.20361e+07
27	4290	75379.7	119138	2.16906e+07
28	4590	73494.8	127186	2.18249e+07
		Bleaching Corrected Data
	Time_(sec)	Roi1-bkgd_bleach-corr	Roi2-bkgd_bleach-corr
1	0	0.00398285	0.00670431
2	30	0.00443756	0.00635087
3	60	0.00400408	0.00627561
4	90	0.0041541	0.00739336
5	120	0.00430551	0.00707459
6	150	0.00389235	0.00719555
7	180	0.00421991	0.00702348
8	210	0.00257687	0.00407001
9	240	0.0024577	0.00475402
10	270	0.0025652	0.0048214
11	300	0.00277511	0.00477399
12	330	0.00246113	0.00483235
13	360	0.00243435	0.00450537
14	390	0.00233291	0.00466298
15	690	0.00246721	0.00456685
16	990	0.00235182	0.00510497
17	1290	0.003001	0.00530931
18	1590	0.00262416	0.00587726
19	1890	0.00293626	0.00564685
20	2190	0.00274532	0.00638328
21	2490	0.00353079	0.00665825
22	2790	0.00382555	0.00572372
23	3090	0.00387368	0.00533487
24	3390	0.00377991	0.00617086
25	3690	0.00349962	0.00529161
26	3990	0.00354389	0.00538047
27	4290	0.00347521	0.00549261
28	4590	0.00336747	0.00582755
		Normalized Data
	Time_(sec)	Roi1_corr_norm	Roi2_corr_norm
1	0	1	1
2	30	1.11417	0.947281
3	60	1.00533	0.936056
4	90	1.043	1.10278
5	120	1.08101	1.05523
6	150	0.977277	1.07327
7	180	1.05952	1.04761
8	210	0.646992	0.607073
9	240	0.617069	0.709099
10	270	0.644061	0.719149
11	300	0.696766	0.712077
12	330	0.617932	0.720782
13	360	0.611208	0.672011
14	390	0.585739	0.695519
15	690	0.619458	0.681181
16	990	0.590486	0.761446
17	1290	0.753481	0.791925
18	1590	0.658866	0.876639
19	1890	0.737226	0.842272
20	2190	0.689286	0.952116
21	2490	0.886499	0.99313
22	2790	0.960504	0.853738
23	3090	0.972589	0.795737
24	3390	0.949045	0.920431
25	3690	0.878672	0.789285
26	3990	0.889786	0.802539
27	4290	0.872545	0.819265
28	4590	0.845492	0.869224
		Normalize the bouton fluorescent right after bleaching to 0
	Recovery Time_(sec)
1	0	0	0
2	30	-0.0761296	0.245193
3	60	-0.00745666	0.269348
4	90	0.126633	0.252353
5	120	-0.0739358	0.273272
6	150	-0.0910411	0.156063
7	180	-0.155839	0.212559
8	480	-0.0700517	0.178099
9	780	-0.143762	0.370999
10	1080	0.270929	0.444247
11	1380	0.0302087	0.647837
12	1680	0.229572	0.565244
13	1980	0.107603	0.829227
14	2280	0.609353	0.927795
15	2580	0.797638	0.592799
16	2880	0.828384	0.453408
17	3180	0.768484	0.753081
18	3480	0.589441	0.437902
19	3780	0.617717	0.469756
20	4080	0.573851	0.509952
21	4380	0.505024	0.630016

## Sheet: sham-0520-C6
		Raw Data
	Time_(sec)	Roi1	Ref_fluo	Background
1	0	1082946	431479390	32703533
2	30	1.06902e+06	4.26416e+08	3.25838e+07
3	60	1.07995e+06	4.25705e+08	3.27136e+07
4	90	1.07892e+06	4.27125e+08	3.26851e+07
5	120	1.04294e+06	4.25408e+08	3.25654e+07
6	150	1.06996e+06	4.23345e+08	3.25596e+07
7	180	1.08995e+06	4.23177e+08	3.25347e+07
8	210	925390	4.25123e+08	3.26884e+07
9	240	941866	4.24289e+08	3.27556e+07
10	270	948366	4.22182e+08	3.26583e+07
11	300	939440	4.26791e+08	3.27615e+07
12	330	954081	4.24e+08	3.26792e+07
13	360	944071	4.21331e+08	3.25792e+07
14	390	947697	4.21604e+08	3.25706e+07
15	690	970248	4.27787e+08	3.26621e+07
16	990	988076	4.3073e+08	3.25674e+07
17	1290	971228	4.3255e+08	3.2726e+07
18	1590	955129	4.31982e+08	3.26032e+07
19	1890	955441	4.35143e+08	3.26392e+07
20	2190	957775	4.3711e+08	3.27097e+07
21	2490	972563	4.32165e+08	3.26887e+07
22	2790	984007	4.34562e+08	3.25972e+07
23	3090	987669	4.34498e+08	3.26374e+07
24	3390	1.00942e+06	4.37831e+08	3.27135e+07
25	3690	1.00697e+06	4.35184e+08	3.25865e+07
26	3990	1.00306e+06	4.37382e+08	3.27923e+07
27	4290	994625	4.3659e+08	3.26183e+07
28	4590	1.00052e+06	4.36567e+08	3.26086e+07
		Background corrected Data
	Time_(sec)	Roi1-bkgd-corr	Ref_fluo-bkgd-corr
1	0	280026	1.74105e+08
2	30	269037	1.69984e+08
3	60	276782	1.68251e+08
4	90	276451	1.69895e+08
5	120	243415	1.69121e+08
6	150	270573	1.67103e+08
7	180	291178	1.67132e+08
8	210	122842	1.67867e+08
9	240	137668	1.66505e+08
10	270	146556	1.65163e+08
11	300	135097	1.68961e+08
12	330	151759	1.66817e+08
13	360	144204	1.64935e+08
14	390	148040	1.65275e+08
15	690	168344	1.70738e+08
16	990	188498	1.74427e+08
17	1290	167756	1.74998e+08
18	1590	154673	1.75397e+08
19	1890	154101	1.78275e+08
20	2190	154703	1.79686e+08
21	2490	170008	1.74907e+08
22	2790	183699	1.78024e+08
23	3090	186372	1.77644e+08
24	3390	206259	1.80379e+08
25	3690	206926	1.7873e+08
26	3990	197963	1.79309e+08
27	4290	193799	1.79887e+08
28	4590	199929	1.79939e+08
		Bleaching Corrected Data
	Time_(sec)	Roi1-bkgd_bleach-corr
1	0	0.00160838
2	30	0.00158272
3	60	0.00164506
4	90	0.00162719
5	120	0.00143929
6	150	0.0016192
7	180	0.0017422
8	210	0.00073178
9	240	0.000826807
10	270	0.000887342
11	300	0.000799573
12	330	0.00090973
13	360	0.000874309
14	390	0.000895716
15	690	0.000985978
16	990	0.00108067
17	1290	0.000958614
18	1590	0.000881846
19	1890	0.000864399
20	2190	0.000860962
21	2490	0.00097199
22	2790	0.00103188
23	3090	0.00104913
24	3390	0.00114348
25	3690	0.00115775
26	3990	0.00110403
27	4290	0.00107734
28	4590	0.00111109
		Normalized Data
	Time_(sec)	Roi1_corr_norm
1	0	1
2	30	0.984051
3	60	1.0228
4	90	1.0117
5	120	0.894873
6	150	1.00673
7	180	1.08321
8	210	0.454981
9	240	0.514063
10	270	0.551701
11	300	0.497131
12	330	0.56562
13	360	0.543597
14	390	0.556907
15	690	0.613027
16	990	0.671901
17	1290	0.596013
18	1590	0.548283
19	1890	0.537436
20	2190	0.535299
21	2490	0.60433
22	2790	0.641563
23	3090	0.652293
24	3390	0.710952
25	3690	0.719829
26	3990	0.686425
27	4290	0.669831
28	4590	0.690817
		Normalize the bouton fluorescent right after bleaching to 0
	Recovery Time_(sec)
1	0	0
2	30	0.10831
3	60	0.177306
4	90	0.0772692
5	120	0.202823
6	150	0.162451
7	180	0.18685
8	480	0.289729
9	780	0.397656
10	1080	0.258539
11	1380	0.171041
12	1680	0.151156
13	1980	0.147238
14	2280	0.273785
15	2580	0.342041
16	2880	0.361711
17	3180	0.469243
18	3480	0.485515
19	3780	0.424281
20	4080	0.39386
21	4380	0.432331

## Sheet: sham-0608-C1
		Raw Data
	Time_(sec)	Roi1	Roi2	Roi3	Ref_fluo	Background				Filter out Roi1, no mCerulean3 expression.
1	0	624145	513770	439301	140912145	27750263
2	30	630321	513949	459973	1.41105e+08	2.79131e+07
3	60	631382	528035	452203	1.4124e+08	2.78192e+07
4	90	613589	512811	438755	1.41009e+08	2.78087e+07
5	120	613645	515914	438430	1.40355e+08	2.77519e+07
6	150	593719	512497	423532	1.404e+08	2.77769e+07
7	180	600188	506290	429649	1.40351e+08	2.77833e+07
8	210	411342	384661	341541	1.40281e+08	2.77354e+07
9	240	425121	413175	351856	1.40055e+08	2.77109e+07
10	270	442960	427715	359382	1.40299e+08	2.77253e+07
11	300	447270	422253	353944	1.40649e+08	2.78126e+07
12	330	444309	414677	361735	1.40478e+08	2.7662e+07
13	360	454513	418429	366008	1.4052e+08	2.76444e+07
14	390	493924	429521	372115	1.4122e+08	2.77309e+07
15	690	476970	442280	401318	1.42026e+08	2.77792e+07
16	990	507319	450301	395477	1.44509e+08	2.79113e+07
17	1290	497414	464358	412300	1.44233e+08	2.78707e+07
18	1590	520382	457910	410706	1.44804e+08	2.80111e+07
19	1890	513264	436995	417071	1.4358e+08	2.77678e+07
20	2190	480317	418410	394965	1.39473e+08	2.76667e+07
21	2490	478242	415565	408504	1.40556e+08	2.77731e+07
22	2790	452417	399426	406322	1.36594e+08	2.7652e+07
23	3090	449152	394974	388324	1.35946e+08	2.76429e+07
24	3390	452952	403387	399330	1.35853e+08	2.75795e+07
25	3690	496614	408157	399768	1.36723e+08	2.75324e+07
26	3990	480031	414501	403855	1.37037e+08	2.76372e+07
27	4290	480319	410660	385146	1.36849e+08	2.75676e+07
28	4590	484551	420765	380448	1.36853e+08	2.75502e+07
		Background corrected Data
	Time_(sec)	Roi1-bkgd-corr	Roi2-bkgd-corr	Roi3-bkgd-corr	Ref_fluo-bkgd-corr
1	0	325755	215380	140911	2.65803e+07
2	30	330180	213809	159832	2.61019e+07
3	60	332251	228904	153072	2.66243e+07
4	90	314571	213793	139737	2.64362e+07
5	120	315237	217507	140023	2.60163e+07
6	150	295042	213820	124855	2.59581e+07
7	180	301442	207545	130904	2.58828e+07
8	210	113112	86430.4	43311.1	2.60099e+07
9	240	127155	115209	53889.5	2.58852e+07
10	270	144839	129593	61260.7	2.60697e+07
11	300	148210	123192	54883.7	2.60599e+07
12	330	146868	117236	64293.5	2.65099e+07
13	360	157261	121177	68756.7	2.66241e+07
14	390	195741	131339	73932.5	2.69674e+07
15	690	178269	143579	102617	2.75744e+07
16	990	207197	150179	95355.2	2.95138e+07
17	1290	197730	164674	112615	2.9405e+07
18	1590	219187	156716	109512	2.93973e+07
19	1890	214685	138416	118493	2.91757e+07
20	2190	182825	120919	97473.2	2.54857e+07
21	2490	179607	116930	109869	2.61303e+07
22	2790	155084	102092	108989	2.26666e+07
23	3090	151917	97738.5	91088.5	2.2056e+07
24	3390	156399	106834	102777	2.2225e+07
25	3690	200566	112110	103720	2.32889e+07
26	3990	182857	117327	106680	2.31708e+07
27	4290	183894	114235	88720.7	2.32701e+07
28	4590	188312	124526	84209.4	2.33453e+07
		Bleaching Corrected Data
	Time_(sec)	Roi1-bkgd_bleach-corr	Roi2-bkgd_bleach-corr	Roi3-bkgd_bleach-corr
1	0	0.0122555	0.00810299	0.00530133
2	30	0.0126497	0.0081913	0.0061234
3	60	0.0124793	0.00859756	0.00574932
4	90	0.0118992	0.00808711	0.00528582
5	120	0.0121169	0.00836038	0.0053821
6	150	0.0113661	0.0082371	0.00480988
7	180	0.0116464	0.00801862	0.00505755
8	210	0.00434881	0.00332298	0.00166518
9	240	0.00491225	0.00445075	0.00208187
10	270	0.00555583	0.00497103	0.00234988
11	300	0.00568727	0.00472727	0.00210606
12	330	0.0055401	0.00442234	0.00242526
13	360	0.00590672	0.00455141	0.0025825
14	390	0.00725845	0.00487028	0.00274155
15	690	0.00646502	0.00520697	0.00372146
16	990	0.00702034	0.00508842	0.00323087
17	1290	0.00672435	0.00560019	0.00382979
18	1590	0.00745605	0.00533098	0.00372523
19	1890	0.00735836	0.00474424	0.00406135
20	2190	0.00717362	0.00474456	0.00382462
21	2490	0.00687352	0.00447487	0.00420466
22	2790	0.00684194	0.00450406	0.00480833
23	3090	0.00688777	0.00443138	0.00412988
24	3390	0.00703706	0.00480692	0.00462437
25	3690	0.00861209	0.00481386	0.00445364
26	3990	0.0078917	0.00506356	0.00460409
27	4290	0.00790258	0.00490907	0.00381265
28	4590	0.0080664	0.00533408	0.00360713
		Normalized Data
	Time_(sec)	Roi1_corr_norm	Roi2_corr_norm	Roi3_corr_norm
1	0	1	1	1
2	30	1.03216	1.0109	1.15507
3	60	1.01826	1.06103	1.0845
4	90	0.97093	0.99804	0.997074
5	120	0.988689	1.03177	1.01524
6	150	0.927426	1.01655	0.907296
7	180	0.950301	0.989588	0.954015
8	210	0.354845	0.410093	0.314105
9	240	0.40082	0.549272	0.392706
10	270	0.453333	0.613481	0.443263
11	300	0.464059	0.583398	0.39727
12	330	0.45205	0.545767	0.457481
13	360	0.481965	0.561695	0.487142
14	390	0.592261	0.601047	0.517144
15	690	0.52752	0.642598	0.701987
16	990	0.572832	0.627969	0.609444
17	1290	0.54868	0.691126	0.722421
18	1590	0.608384	0.657903	0.702697
19	1890	0.600413	0.585493	0.7661
20	2190	0.585339	0.585532	0.721445
21	2490	0.560852	0.55225	0.793132
22	2790	0.558275	0.555851	0.907005
23	3090	0.562014	0.546882	0.779026
24	3390	0.574196	0.593228	0.872304
25	3690	0.702712	0.594084	0.840098
26	3990	0.643931	0.6249	0.868478
27	4290	0.644819	0.605835	0.719188
28	4590	0.658186	0.658286	0.68042
		Normalize the bouton fluorescent right after bleaching to 0
	Recovery Time_(sec)
1	0	0	0	0
2	30	0.0730771	0.229928	0.111957
3	60	0.156548	0.336002	0.183968
4	90	0.173597	0.286304	0.118458
5	120	0.154509	0.224137	0.20422
6	150	0.202059	0.250451	0.246469
7	180	0.377376	0.315461	0.289202
8	480	0.274469	0.384105	0.552487
9	780	0.346493	0.359936	0.420672
10	1080	0.308104	0.464273	0.581592
11	1380	0.403004	0.409388	0.553498
12	1680	0.390334	0.289765	0.643808
13	1980	0.366374	0.28983	0.580202
14	2280	0.327451	0.234846	0.682311
15	2580	0.323355	0.240796	0.844508
16	2880	0.329299	0.225979	0.66222
17	3180	0.348661	0.302543	0.795081
18	3480	0.552941	0.303958	0.749208
19	3780	0.459507	0.354867	0.789632
20	4080	0.460919	0.323371	0.576988
21	4380	0.482166	0.410021	0.521767

## Sheet: sham-0608-C5
		Raw Data
	Time_(sec)	Roi1	Roi2	Roi3	Roi4	Ref_fluo	Background
1	0	959452	943318	882624	1065593	418318749	27273682			Filter out Roi4, due to almost no recovery.
2	30	973275	970607	881430	1.10649e+06	4.23753e+08	2.73602e+07
3	60	982029	947355	901133	1.118e+06	4.25729e+08	2.73692e+07
4	90	995053	949168	878018	1.1229e+06	4.28055e+08	2.73805e+07
5	120	996711	957866	866676	1.12367e+06	4.27434e+08	2.72371e+07
6	150	994284	976502	887183	1.10292e+06	432189288	2.74113e+07
7	180	994269	962843	889984	1.05404e+06	4.29242e+08	2.72479e+07
8	210	789887	802437	686094	898923	4.30362e+08	2.73652e+07
9	240	816243	803484	710170	950648	4.29103e+08	2.726e+07
10	270	812308	821128	719892	965246	4.31932e+08	2.74009e+07
11	300	840365	840588	732863	962427	432664425	2.72861e+07
12	330	848809	844653	715439	959341	4.30734e+08	2.7219e+07
13	360	855230	845817	742549	964601	4.34941e+08	2.75565e+07
14	390	842189	848192	738678	996426	432775775	2.73369e+07
15	690	873090	849274	796519	1.02423e+06	4.42512e+08	2.73435e+07
16	990	914376	881668	790804	1.06343e+06	447560127	2.73536e+07
17	1290	915990	906739	811482	1.03103e+06	4.49042e+08	2.74191e+07
18	1590	959204	931978	803993	1.03393e+06	4.54843e+08	2.73041e+07
19	1890	933923	941564	826196	997619	4.58007e+08	2.7492e+07
20	2190	962067	899698	831667	1.05181e+06	4.58557e+08	2.74196e+07
21	2490	968322	913314	826800	1.00866e+06	4.57265e+08	2.74072e+07
22	2790	956927	909257	830098	979267	4.59838e+08	2.74276e+07
23	3090	1.00262e+06	969186	854578	931278	4.63508e+08	2.75189e+07
24	3390	992374	963109	861028	951769	4.68035e+08	2.7746e+07
25	3690	958843	937733	875104	1.0507e+06	4.63112e+08	2.74649e+07
26	3990	1.04357e+06	857213	866011	994412	4.67338e+08	2.76005e+07
27	4290	990503	922885	854857	964213	4.64712e+08	2.75213e+07
28	4590	971303	880531	869346	1.04646e+06	4.64483e+08	2.74877e+07
		Background corrected Data
	Time_(sec)	Roi1-bkgd-corr	Roi2-bkgd-corr	Roi3-bkgd-corr	Roi4-bkgd-corr	Ref_fluo-bkgd-corr
1	0	359523	343389	282695	465664	1.24534e+08
2	30	371443	368775	279598	504654	129036168
3	60	379998	345324	299102	515965	1.30915e+08
4	90	392774	346889	275739	520625	1.3312e+08
5	120	397587	358742	267552	524546	1.34044e+08
6	150	391327	373545	284227	499961	1.36922e+08
7	180	394907	363481	290622	454679	1.35735e+08
8	210	187946	200496	84153.1	296982	1.35593e+08
9	240	216616	203857	110544	351021	1.35466e+08
10	270	209580	218401	117165	362519	136777126
11	300	240163	240386	132661	362225	1.38746e+08
12	330	250082	245926	116712	360614	1.37539e+08
13	360	249081	239668	136399	358452	1.38111e+08
14	390	240869	246872	137358	395106	1.3831e+08
15	690	271626	247810	195054	422763	1.47975e+08
16	990	312688	279980	189116	461739	1.52914e+08
17	1290	312863	303612	208356	427908	153691451
18	1590	358606	331380	203395	433329	1.60731e+08
19	1890	329191	336833	221465	392888	1.61871e+08
20	2190	358927	296558	228528	448668	163200627
21	2490	365457	310449	223935	405792	1.62043e+08
22	2790	353611	305942	226783	375951	1.64396e+08
23	3090	397300	363864	249256	325956	1.67083e+08
24	3390	382055	352790	250709	341450	1.69162e+08
25	3690	354707	333597	270969	446566	1.67267e+08
26	3990	436456	250095	258893	387294	170033220
27	4290	385127	317509	249481	358837	1.6826e+08
28	4590	366666	275895	264710	441820	1.68393e+08
		Bleaching Corrected Data
	Time_(sec)	Roi1-bkgd_bleach-corr	Roi2-bkgd_bleach-corr	Roi3-bkgd_bleach-corr	Roi4-bkgd_bleach-corr
1	0	0.00288694	0.00275738	0.00227002	0.00373924
2	30	0.0028786	0.00285792	0.00216682	0.00391095
3	60	0.00290263	0.00263777	0.00228471	0.00394122
4	90	0.00295053	0.00260584	0.00207136	0.00391095
5	120	0.00296611	0.00267631	0.00199601	0.00391325
6	150	0.00285803	0.00272816	0.00207583	0.00365142
7	180	0.0029094	0.00267787	0.0021411	0.00334975
8	210	0.00138611	0.00147867	0.000620632	0.00219025
9	240	0.00159904	0.00150486	0.000816023	0.00259121
10	270	0.00153228	0.00159676	0.00085661	0.00265043
11	300	0.00173095	0.00173256	0.000956139	0.0026107
12	330	0.00181826	0.00178805	0.000848576	0.00262191
13	360	0.00180349	0.00173533	0.000987609	0.0025954
14	390	0.00174151	0.00178492	0.000993113	0.00285667
15	690	0.00183561	0.00167467	0.00131815	0.00285698
16	990	0.00204485	0.00183096	0.00123675	0.00301959
17	1290	0.00203566	0.00197547	0.00135568	0.0027842
18	1590	0.00223109	0.0020617	0.00126544	0.00269598
19	1890	0.00203367	0.00208087	0.00136816	0.00242717
20	2190	0.0021993	0.00181714	0.00140029	0.00274918
21	2490	0.00225532	0.00191585	0.00138195	0.00250423
22	2790	0.00215098	0.00186101	0.00137949	0.00228687
23	3090	0.00237786	0.00217775	0.00149181	0.00195087
24	3390	0.00225851	0.00208551	0.00148206	0.00201847
25	3690	0.0021206	0.00199439	0.00161997	0.00266978
26	3990	0.00256688	0.00147086	0.0015226	0.00227775
27	4290	0.00228888	0.00188702	0.00148271	0.00213264
28	4590	0.00217744	0.0016384	0.00157198	0.00262374
		Normalized Data
	Time_(sec)	Roi1_corr_norm	Roi2_corr_norm	Roi3_corr_norm	Roi4_corr_norm
1	0	1	1	1	1
2	30	0.997111	1.03646	0.954538	1.04592
3	60	1.00544	0.95662	1.00647	1.05402
4	90	1.02203	0.945041	0.912487	1.04592
5	120	1.02742	0.970597	0.879293	1.04654
6	150	0.989985	0.989401	0.914455	0.976515
7	180	1.00778	0.971164	0.943208	0.895837
8	210	0.480132	0.536256	0.273404	0.585747
9	240	0.553889	0.545754	0.359479	0.692976
10	270	0.530761	0.579086	0.377358	0.708816
11	300	0.59958	0.628335	0.421204	0.698191
12	330	0.629825	0.648458	0.373819	0.701187
13	360	0.624706	0.62934	0.435067	0.694098
14	390	0.603239	0.647323	0.437492	0.76397
15	690	0.635834	0.607341	0.58068	0.764055
16	990	0.708313	0.664021	0.544818	0.807541
17	1290	0.705126	0.716427	0.59721	0.744589
18	1590	0.772822	0.747702	0.557456	0.720997
19	1890	0.704437	0.754654	0.602707	0.649107
20	2190	0.761811	0.659008	0.616862	0.735224
21	2490	0.781214	0.694806	0.608784	0.669717
22	2790	0.745072	0.674918	0.607701	0.611587
23	3090	0.823663	0.789788	0.657181	0.521728
24	3390	0.78232	0.756337	0.652885	0.539809
25	3690	0.734551	0.723292	0.713639	0.713989
26	3990	0.889137	0.533426	0.670746	0.609149
27	4290	0.792841	0.684351	0.653173	0.570339
28	4590	0.754239	0.594185	0.692496	0.701677
		Normalize the bouton fluorescent right after bleaching to 0
	Recovery Time_(sec)
1	0	0	0	0	0
2	30	0.139962	0.0213408	0.128288	0.253196
3	60	0.0960753	0.0962327	0.154937	0.290597
4	90	0.226667	0.206886	0.220285	0.265509
5	120	0.284059	0.252099	0.149662	0.272583
6	150	0.274346	0.209145	0.240947	0.255845
7	180	0.23361	0.249549	0.244561	0.42083
8	480	0.295463	0.159715	0.457974	0.421031
9	780	0.433	0.287067	0.404524	0.523714
10	1080	0.426953	0.404815	0.48261	0.375067
11	1380	0.555415	0.475085	0.423361	0.319361
12	1680	0.425645	0.490705	0.490804	0.149609
13	1980	0.534518	0.275804	0.511901	0.352955
14	2280	0.571338	0.356236	0.49986	0.198274
15	2580	0.502755	0.311551	0.498247	0.0610135
16	2880	0.65189	0.569646	0.571994	-0.151166
17	3180	0.573437	0.494487	0.565591	-0.108474
18	3480	0.482789	0.42024	0.656141	0.302813
19	3780	0.776135	-0.00635935	0.592211	0.0552567
20	4080	0.593403	0.332746	0.56602	-0.0363824
21	4380	0.52015	0.130158	0.624628	0.273741

## Sheet: sham-0609-C3
		Raw Data
	Time_(sec)	Roi1	Roi2	Roi3	Ref_fluo	Background
1	0	734627	1125606	684954	449957374	25879044			Filter out Roi1, due to large abrupt change.
2	30	729797	1.11607e+06	662086	4.48648e+08	2.575e+07
3	60	737289	1.14023e+06	686275	4.51285e+08	2.58829e+07
4	90	742663	1.15326e+06	670632	4.52928e+08	2.59019e+07
5	120	754404	1.14266e+06	679404	4.5249e+08	2.58707e+07
6	150	730410	1.13428e+06	676293	4.50957e+08	2.57439e+07
7	180	743137	1.12321e+06	671115	4.50799e+08	2.57952e+07
8	210	538452	646463	514032	4.488e+08	2.56785e+07
9	240	560769	694440	522251	4.50291e+08	2.58241e+07
10	270	559375	702709	520772	4.49791e+08	2.58064e+07
11	300	564661	711102	530965	4.525e+08	2.59006e+07
12	330	572498	711199	528001	4.50046e+08	2.58209e+07
13	360	570939	709677	534744	4.52376e+08	2.58734e+07
14	390	583534	706528	523982	4.50196e+08	2.57498e+07
15	690	612951	725259	547741	4.56884e+08	2.59447e+07
16	990	625048	754756	563132	4.59388e+08	2.59114e+07
17	1290	727851	818653	555289	4.59985e+08	2.58605e+07
18	1590	805993	807492	577282	4.60137e+08	2.59235e+07
19	1890	842790	807601	573041	4.62069e+08	2.59969e+07
20	2190	820135	812766	571082	4.59806e+08	2.59195e+07
21	2490	881249	859776	590768	4.61143e+08	2.59117e+07
22	2790	863664	870622	640165	4.62583e+08	2.59236e+07
23	3090	946729	871657	630006	4.61391e+08	2.59421e+07
24	3390	960177	883567	625901	4.62922e+08	2.59666e+07
25	3690	857821	899682	625070	4.62729e+08	2.5972e+07
26	3990	839155	913220	606003	4.63105e+08	2.59485e+07
27	4290	962543	884031	607285	4.61366e+08	2.58451e+07
28	4590	870732	927789	613930	4.61585e+08	2.58948e+07
		Background corrected Data
	Time_(sec)	Roi1-bkgd-corr	Roi2-bkgd-corr	Roi3-bkgd-corr	Ref_fluo-bkgd-corr
1	0	304334	695313	254661	9.63027e+07
2	30	301650	687922	233939	9.67568e+07
3	60	306932	709876	255917	9.75773e+07
4	90	311991	722586	239960	9.89616e+07
5	120	324251	712506	249250	9.89494e+07
6	150	302364	706232	248247	9.91496e+07
7	180	314239	694311	242217	9.82905e+07
8	210	111493	219504	87073	9.78856e+07
9	240	131389	265060	92871.2	9.73866e+07
10	270	130290	273624	91686.9	9.71296e+07
11	300	134009	280451	100314	9.85505e+07
12	330	143171	281872	98674.6	9.7186e+07
13	360	140740	279477	104545	9.87977e+07
14	390	155389	278384	95837.6	9.83067e+07
15	690	181567	293875	116357	1.02332e+08
16	990	194217	323925	132301	1.05291e+08
17	1290	297866	388668	125304	1.06584e+08
18	1590	374960	376460	146250	1.05875e+08
19	1890	410537	375348	140789	1.06803e+08
20	2190	389170	381801	140117	1.05599e+08
21	2490	450413	428940	159932	1.07042e+08
22	2790	432631	439589	209132	1.0832e+08
23	3090	515388	440316	198665	1.06876e+08
24	3390	528429	451819	194153	1.08072e+08
25	3690	425982	467844	193232	1.07804e+08
26	3990	407706	481772	174555	1.08501e+08
27	4290	532815	454304	177557	1.08176e+08
28	4590	440178	497234	183375	1.07715e+08
		Bleaching Corrected Data
	Time_(sec)	Roi1-bkgd_bleach-corr	Roi2-bkgd_bleach-corr	Roi3-bkgd_bleach-corr
1	0	0.00316018	0.00722008	0.00264438
2	30	0.00311761	0.0071098	0.0024178
3	60	0.00314553	0.00727501	0.00262271
4	90	0.00315264	0.00730168	0.00242478
5	120	0.00327693	0.00720071	0.00251897
6	150	0.00304958	0.0071229	0.00250376
7	180	0.00319704	0.00706386	0.00246429
8	210	0.00113902	0.00224246	0.000889539
9	240	0.00134915	0.00272173	0.000953634
10	270	0.0013414	0.00281711	0.000943965
11	300	0.0013598	0.00284576	0.00101789
12	330	0.00147317	0.00290033	0.00101532
13	360	0.00142453	0.00282878	0.00105817
14	390	0.00158066	0.00283179	0.000974883
15	690	0.00177429	0.00287176	0.00113705
16	990	0.00184458	0.00307647	0.00125653
17	1290	0.00279467	0.00364661	0.00117564
18	1590	0.00354154	0.0035557	0.00138135
19	1890	0.00384386	0.00351438	0.00131821
20	2190	0.00368535	0.00361556	0.00132687
21	2490	0.00420781	0.00400721	0.00149411
22	2790	0.00399402	0.00405825	0.00193069
23	3090	0.00482232	0.00411989	0.00185884
24	3390	0.00488961	0.00418072	0.00179652
25	3690	0.00395145	0.00433976	0.00179243
26	3990	0.00375764	0.00444027	0.00160879
27	4290	0.00492546	0.00419968	0.00164137
28	4590	0.00408651	0.00461621	0.00170241
		Normalized Data
	Time_(sec)	Roi1_corr_norm	Roi2_corr_norm	Roi3_corr_norm
1	0	1	1	1
2	30	0.986528	0.984727	0.914317
3	60	0.995363	1.00761	0.991806
4	90	0.997615	1.0113	0.916954
5	120	1.03694	0.997318	0.952572
6	150	0.965001	0.98654	0.946825
7	180	1.01166	0.978363	0.931897
8	210	0.360427	0.310586	0.336388
9	240	0.426922	0.376966	0.360626
10	270	0.42447	0.390177	0.35697
11	300	0.430293	0.394145	0.384925
12	330	0.466165	0.401704	0.383953
13	360	0.450773	0.391794	0.400157
14	390	0.500179	0.39221	0.368662
15	690	0.56145	0.397747	0.429986
16	990	0.583694	0.4261	0.475169
17	1290	0.884339	0.505065	0.444582
18	1590	1.12068	0.492474	0.52237
19	1890	1.21634	0.486751	0.498493
20	2190	1.16618	0.500765	0.50177
21	2490	1.33151	0.55501	0.565012
22	2790	1.26386	0.562078	0.730109
23	3090	1.52596	0.570616	0.702941
24	3390	1.54726	0.579041	0.679371
25	3690	1.25039	0.601068	0.677827
26	3990	1.18906	0.614989	0.60838
27	4290	1.5586	0.581667	0.620702
28	4590	1.29313	0.639357	0.643785
		Normalize the bouton fluorescent right after bleaching to 0	Normalize the bouton fluorescent right after bleaching to 0
	Recovery Time_(sec)
1	0	0	0	0
2	30	0.104128	0.0969707	0.0394608
3	60	0.100288	0.116269	0.0335083
4	90	0.109406	0.122066	0.0790206
5	120	0.165581	0.133109	0.0774367
6	150	0.141477	0.118631	0.103818
7	180	0.218844	0.119239	0.0525432
8	480	0.314793	0.127328	0.152382
9	780	0.349624	0.168747	0.22594
10	1080	0.82042	0.284102	0.176144
11	1380	1.19051	0.265709	0.302786
12	1680	1.34032	0.257349	0.263912
13	1980	1.26177	0.27782	0.269248
14	2280	1.52067	0.357064	0.372208
15	2580	1.41473	0.36739	0.640993
16	2880	1.82517	0.379863	0.596762
17	3180	1.85852	0.39217	0.558388
18	3480	1.39363	0.424349	0.555875
19	3780	1.2976	0.444684	0.442813
20	4080	1.87628	0.396006	0.462874
21	4380	1.46056	0.480283	0.500454

## Sheet: sham-0611-C2
		Raw Data
	Time_(sec)	Roi1	Roi2	Roi3	Ref_fluo	Background
1	0	585262	624728	601866	679518008	30537808			Filter out Roi1, due to less than 40% bouton fluorescent bleaching.
2	30	575640	649486	596507	6.79542e+08	3.04914e+07
3	60	600898	646433	622714	6.78819e+08	3.05069e+07
4	90	624404	659783	630996	6.88972e+08	3.09451e+07
5	120	615062	643594	627342	6.88303e+08	3.11704e+07
6	150	596191	616216	607176	6.79178e+08	3.08173e+07
7	180	594823	623258	615551	6.69656e+08	3.0258e+07
8	210	538240	508011	500123	6.6848e+08	3.04234e+07
9	240	537299	533600	509492	6.68108e+08	3.06592e+07
10	270	535322	529531	512714	6.72507e+08	3.07155e+07
11	300	528204	531447	509874	6.67763e+08	3.0498e+07
12	330	528971	528162	522056	6.72246e+08	3.08512e+07
13	360	532718	516256	514673	6.69736e+08	3.06345e+07
14	390	535712	528085	531142	6.74528e+08	3.05807e+07
15	690	587049	547428	562039	6.95156e+08	3.06976e+07
16	990	599832	577544	586417	7.03167e+08	3.10051e+07
17	1290	591729	590448	588740	7.03049e+08	3.09377e+07
18	1590	611220	606082	582309	7.01152e+08	3.07117e+07
19	1890	610839	602114	569453	7.06645e+08	3.09166e+07
20	2190	585904	619892	589025	7.09847e+08	3.0872e+07
21	2490	584824	626366	585076	7.04627e+08	3.06573e+07
22	2790	575934	624009	576856	6.9874e+08	3.05595e+07
23	3090	610360	604901	594402	7.05951e+08	3.07991e+07
24	3390	600908	651176	565464	7.03228e+08	3.07738e+07
25	3690	596080	655023	573671	7.0089e+08	3.0944e+07
26	3990	598084	631928	559414	6.99105e+08	3.07374e+07
27	4290	590181	648915	566130	6.98274e+08	3.07044e+07
28	4590	593652	630168	613786	6.86093e+08	3.028e+07
		Background corrected Data
	Time_(sec)	Roi1-bkgd-corr	Roi2-bkgd-corr	Roi3-bkgd-corr	Ref_fluo-bkgd-corr
1	0	282044	321510	298648	2.46485e+08
2	30	272883	346729	293751	2.47168e+08
3	60	297987	343522	319803	2.46224e+08
4	90	317142	352521	323735	2.50165e+08
5	120	305563	334095	317843	2.463e+08
6	150	290198	310223	301183	2.42181e+08
7	180	294384	322818	315111	2.40591e+08
8	210	236158	205929	198041	2.37069e+08
9	240	232876	229176	205069	2.33354e+08
10	270	230340	224549	207732	2.36955e+08
11	300	225381	228624	207051	2.35294e+08
12	330	222642	221833	215727	2.34769e+08
13	360	228541	212079	210495	2.35332e+08
14	390	232068	224441	227498	2.40887e+08
15	690	282244	242624	257234	2.59857e+08
16	990	291974	269686	278559	2.63507e+08
17	1290	284540	283259	281551	2.64345e+08
18	1590	306276	301138	277365	2.65654e+08
19	1890	303861	295136	262475	2.68241e+08
20	2190	279368	313356	282489	2.72076e+08
21	2490	280420	321962	280672	2.699e+08
22	2790	272501	320576	273423	2.654e+08
23	3090	304548	299089	288590	2.69213e+08
24	3390	295347	345615	259903	2.66849e+08
25	3690	288829	347773	266420	2.62097e+08
26	3990	292884	326728	254214	2.63241e+08
27	4290	285309	344042	261257	2.62878e+08
28	4590	292994	329511	313128	2.56716e+08
		Bleaching Corrected Data
	Time_(sec)	Roi1-bkgd_bleach-corr	Roi2-bkgd_bleach-corr	Roi3-bkgd_bleach-corr
1	0	0.00114426	0.00130438	0.00121163
2	30	0.00110404	0.00140281	0.00118847
3	60	0.00121023	0.00139516	0.00129883
4	90	0.00126773	0.00140916	0.00129409
5	120	0.00124061	0.00135646	0.00129047
6	150	0.00119827	0.00128095	0.00124362
7	180	0.00122358	0.00134177	0.00130974
8	210	0.000996157	0.000868645	0.000835376
9	240	0.000997953	0.0009821	0.00087879
10	270	0.000972086	0.000947646	0.000876674
11	300	0.000957869	0.000971651	0.000879966
12	330	0.000948344	0.000944897	0.000918889
13	360	0.000971141	0.00090119	0.000894459
14	390	0.000963393	0.00093173	0.00094442
15	690	0.00108615	0.000933682	0.000989908
16	990	0.00110803	0.00102345	0.00105712
17	1290	0.0010764	0.00107155	0.00106509
18	1590	0.00115292	0.00113357	0.00104408
19	1890	0.00113279	0.00110026	0.000978503
20	2190	0.0010268	0.00115172	0.00103827
21	2490	0.00103898	0.00119289	0.00103991
22	2790	0.00102676	0.0012079	0.00103023
23	3090	0.00113125	0.00111097	0.00107198
24	3390	0.0011068	0.00129517	0.000973972
25	3690	0.00110199	0.00132688	0.00101649
26	3990	0.00111261	0.00124117	0.000965708
27	4290	0.00108533	0.00130875	0.000993834
28	4590	0.00114131	0.00128356	0.00121974
		Normalized Data
	Time_(sec)	Roi1_corr_norm	Roi2_corr_norm	Roi3_corr_norm
1	0	1	1	1
2	30	0.964846	1.07546	0.980884
3	60	1.05765	1.0696	1.07197
4	90	1.1079	1.08033	1.06806
5	120	1.0842	1.03992	1.06507
6	150	1.04719	0.982041	1.02641
7	180	1.06932	1.02867	1.08097
8	210	0.870565	0.665945	0.689466
9	240	0.872135	0.752925	0.725297
10	270	0.849529	0.726511	0.723551
11	300	0.837105	0.744915	0.726268
12	330	0.82878	0.724404	0.758392
13	360	0.848703	0.690896	0.738229
14	390	0.841932	0.714309	0.779464
15	690	0.949214	0.715805	0.817007
16	990	0.968335	0.784626	0.87248
17	1290	0.940689	0.821502	0.879057
18	1590	1.00756	0.869051	0.861721
19	1890	0.989973	0.843515	0.807594
20	2190	0.897348	0.882966	0.856925
21	2490	0.907987	0.914528	0.858275
22	2790	0.897308	0.926032	0.850287
23	3090	0.988629	0.851727	0.884741
24	3390	0.967255	0.992939	0.803854
25	3690	0.963058	1.01725	0.838949
26	3990	0.972333	0.951544	0.797034
27	4290	0.948494	1.00335	0.820248
28	4590	0.997421	0.984038	1.0067
		Normalize the bouton fluorescent right after bleaching to 0
	Recovery Time_(sec)
1	0	0	0	0
2	30	0.00888135	0.232887	0.101666
3	60	-0.119025	0.162163	0.0967112
4	90	-0.189323	0.211439	0.10442
5	120	-0.236424	0.156521	0.195566
6	150	-0.123696	0.0668038	0.138358
7	180	-0.162011	0.129493	0.255354
8	480	0.445009	0.133499	0.361876
9	780	0.553198	0.317764	0.519273
10	1080	0.396772	0.4165	0.537934
11	1380	0.775136	0.543812	0.488745
12	1680	0.675627	0.47544	0.335168
13	1980	0.151541	0.58107	0.475138
14	2280	0.211737	0.665576	0.478968
15	2580	0.151313	0.696376	0.456304
16	2880	0.668022	0.497426	0.55406
17	3180	0.547087	0.87552	0.324557
18	3480	0.523337	0.940619	0.424132
19	3780	0.57582	0.764685	0.305206
20	4080	0.440931	0.903399	0.371071
21	4380	0.717771	0.851688	0.900098

## Sheet: sham-0612-C1
		Raw Data
	Time_(sec)	Roi1	Roi2	Roi3	Roi4	Ref_fluo	Background
1	0	888901	1231201	527708	453188	601697215	34141865			Filter out Roi3, due to less than 40% bouton fluorescence bleaching.
2	30	878090	1.24497e+06	515179	455554	6.05977e+08	3.41218e+07
3	60	876968	1.244e+06	523931	444387	6.02518e+08	3.39542e+07
4	90	877446	1.27614e+06	537163	451140	6.07886e+08	3.41294e+07
5	120	855406	1.23193e+06	528584	460195	6.0948e+08	3.41547e+07
6	150	863154	1.23582e+06	526305	458399	6.08414e+08	3.41502e+07
7	180	889063	1.25988e+06	536581	464112	6.14991e+08	3.41122e+07
8	210	586612	653280	484603	406596	6.07176e+08	3.38604e+07
9	240	636394	707846	485296	408481	6.1451e+08	3.41884e+07
10	270	652815	715074	493578	426572	6.18256e+08	3.41766e+07
11	300	668412	736536	494474	442080	6.21117e+08	3.42724e+07
12	330	695440	745438	491541	441518	6.23556e+08	3.40352e+07
13	360	703188	759082	506456	437275	6.28503e+08	3.43052e+07
14	390	695133	775175	489223	441958	628550140	3.42114e+07
15	690	698935	840863	515936	432568	6.42237e+08	3.41618e+07
16	990	605429	694813	487006	410116	5.7168e+08	3.40202e+07
17	1290	644099	770429	475391	421219	5.92461e+08	3.38826e+07
18	1590	702186	817121	505166	441580	6.19836e+08	3.41715e+07
19	1890	705728	831525	506605	444435	6.26293e+08	3.41434e+07
20	2190	673454	772020	491807	428978	5.92744e+08	3.3967e+07
21	2490	731017	805649	508269	451039	6.13571e+08	3.39895e+07
22	2790	770862	843665	514339	472064	6.28442e+08	3.4098e+07
23	3090	758081	837973	501177	455086	6.26418e+08	3.39996e+07
24	3390	806417	897096	534739	445352	6.47213e+08	3.41709e+07
25	3690	730210	802412	493344	430902	5.9912e+08	3.38772e+07
26	3990	795084	829324	507768	451276	6.23899e+08	3.40711e+07
27	4290	798565	878253	504394	459781	6.2207e+08	3.39741e+07
28	4590	817481	876245	519227	463798	6.37497e+08	3.42886e+07
		Background corrected Data
	Time_(sec)	Roi1-bkgd-corr	Roi2-bkgd-corr	Roi3-bkgd-corr	Roi4-bkgd-corr	Ref_fluo-bkgd-corr
1	0	579610	921910	218417	143897	2.41006e+08
2	30	568981	935860	206069	146445	2.45497e+08
3	60	569378	936413	216340	136797	2.43809e+08
4	90	568268	966961	227985	141962	2.47326e+08
5	120	545999	922521	219177	150788	2.48653e+08
6	150	553788	926458	216938	149033	2.47635e+08
7	180	580040	950856	227559	155090	2.54613e+08
8	210	279871	346539	177862	99854.2	2.49457e+08
9	240	326681	398133	175583	98767.8	2.53327e+08
10	270	343209	405468	183971	116966	2.57197e+08
11	300	357938	426063	184001	131607	2.59047e+08
12	330	387115	437112	183216	133193	2.63991e+08
13	360	392417	448311	195686	126504	2.66086e+08
14	390	385212	465254	179302	132038	2.67124e+08
15	690	389463	531392	206465	123096	2.81335e+08
16	990	297240	386624	178817	101927	2.12275e+08
17	1290	337157	463487	168448	114276	2.34508e+08
18	1590	392626	507561	195607	132020	2.58831e+08
19	1890	396424	522221	197301	135130	2.65586e+08
20	2190	365747	464313	184100	121271	2.339e+08
21	2490	423107	497739	200358	143129	2.5449e+08
22	2790	461969	534772	205445	163170	2.68214e+08
23	3090	450079	529971	193175	147083	2.6723e+08
24	3390	496863	587542	225185	135798	2.86215e+08
25	3690	423316	495519	186450	124008	2.41224e+08
26	3990	486434	520674	199118	142626	2.63955e+08
27	4290	490793	570481	196622	152009	2.63151e+08
28	4590	506861	565625	208607	153178	2.75256e+08
		Bleaching Corrected Data
	Time_(sec)	Roi1-bkgd_bleach-corr	Roi2-bkgd_bleach-corr	Roi3-bkgd_bleach-corr	Roi4-bkgd_bleach-corr
1	0	0.00240496	0.00382526	0.000906272	0.000597068
2	30	0.00231767	0.0038121	0.000839394	0.000596522
3	60	0.00233534	0.00384076	0.000887333	0.00056108
4	90	0.00229765	0.00390966	0.000921799	0.000573985
5	120	0.00219582	0.00371007	0.000881455	0.000606417
6	150	0.00223631	0.00374123	0.000876042	0.000601826
7	180	0.00227812	0.00373451	0.000893742	0.000609118
8	210	0.00112192	0.00138917	0.000712993	0.000400286
9	240	0.00128956	0.00157162	0.00069311	0.000389883
10	270	0.00133442	0.00157649	0.000715293	0.000454772
11	300	0.00138175	0.00164473	0.0007103	0.000508041
12	330	0.00146639	0.00165579	0.000694024	0.000504536
13	360	0.00147477	0.00168483	0.000735422	0.000475427
14	390	0.00144207	0.00174171	0.000671231	0.000494293
15	690	0.00138434	0.00188882	0.000733876	0.000437544
16	990	0.00140026	0.00182134	0.000842386	0.000480168
17	1290	0.00143772	0.00197642	0.000718303	0.000487302
18	1590	0.00151692	0.00196098	0.000755732	0.000510063
19	1890	0.00149264	0.0019663	0.000742889	0.000508802
20	2190	0.00156369	0.00198509	0.000787088	0.000518475
21	2490	0.00166257	0.00195583	0.000787294	0.000562414
22	2790	0.00172239	0.00199382	0.000765975	0.000608358
23	3090	0.00168424	0.0019832	0.000722878	0.0005504
24	3390	0.00173598	0.0020528	0.000786768	0.000474463
25	3690	0.00175486	0.00205418	0.000772933	0.000514078
26	3990	0.00184286	0.00197258	0.000754363	0.000540342
27	4290	0.00186507	0.00216789	0.000747185	0.000577651
28	4590	0.00184142	0.00205491	0.000757866	0.000556492
		Normalized Data
	Time_(sec)	Roi1_corr_norm	Roi2_corr_norm	Roi3_corr_norm	Roi4_corr_norm
1	0	1	1	1	1
2	30	0.963701	0.996559	0.926205	0.999085
3	60	0.97105	1.00405	0.979101	0.939724
4	90	0.955378	1.02206	1.01713	0.96134
5	120	0.913039	0.969887	0.972616	1.01566
6	150	0.929873	0.978033	0.966644	1.00797
7	180	0.947259	0.976276	0.986173	1.02018
8	210	0.466501	0.363157	0.786732	0.670418
9	240	0.53621	0.410853	0.764792	0.652996
10	270	0.554861	0.412125	0.789269	0.761675
11	300	0.574542	0.429966	0.78376	0.850893
12	330	0.609737	0.432856	0.7658	0.845022
13	360	0.613222	0.44045	0.81148	0.796268
14	390	0.599623	0.455319	0.74065	0.827866
15	690	0.575618	0.493776	0.809774	0.73282
16	990	0.582239	0.476134	0.929507	0.804209
17	1290	0.597813	0.516676	0.792591	0.816157
18	1590	0.630747	0.512639	0.83389	0.85428
19	1890	0.62065	0.51403	0.819719	0.852167
20	2190	0.650194	0.518943	0.868489	0.868368
21	2490	0.691307	0.511293	0.868717	0.941959
22	2790	0.71618	0.521225	0.845193	1.01891
23	3090	0.700317	0.518449	0.797639	0.921837
24	3390	0.721832	0.536643	0.868137	0.794655
25	3690	0.729685	0.537005	0.85287	0.861004
26	3990	0.766276	0.515673	0.83238	0.904991
27	4290	0.775508	0.56673	0.82446	0.96748
28	4590	0.765675	0.537194	0.836246	0.932041
		Normalize the bouton fluorescent right after bleaching to 0
	Recovery Time_(sec)
1	0	0	0	0	0
2	30	0.142896	0.0757973	-0.114548	-0.0541782
3	60	0.181129	0.0778196	0.0132479	0.283781
4	90	0.221473	0.106172	-0.0155164	0.561221
5	120	0.29362	0.110765	-0.109283	0.542962
6	150	0.300763	0.122833	0.12921	0.391355
7	180	0.272888	0.146463	-0.240593	0.489613
8	480	0.22368	0.207579	0.120302	0.194049
9	780	0.237251	0.179542	0.745423	0.416047
10	1080	0.269177	0.24397	0.0305905	0.453203
11	1380	0.336689	0.237555	0.246211	0.571753
12	1680	0.315991	0.239766	0.172224	0.565182
13	1980	0.376552	0.247574	0.426852	0.615563
14	2280	0.460832	0.235416	0.428039	0.844408
15	2580	0.511819	0.2512	0.305223	1.08369
16	2880	0.479301	0.246787	0.0569469	0.781835
17	3180	0.523404	0.275702	0.425011	0.386337
18	3480	0.539502	0.276277	0.345307	0.592663
19	3780	0.61451	0.242376	0.238324	0.72945
20	4080	0.633435	0.323515	0.196977	0.923769
21	4380	0.613278	0.276578	0.258509	0.813566

## Sheet: sham-0706-C2
		Raw Data
	Time_(sec)	Roi1	Roi2	Ref_fluo	Background
1	0	748487	701081	646337069	18044019			Filter out Roi, due to large abrupt change.
2	30	774919	696627	6.41134e+08	1.79971e+07
3	60	745332	686407	6.36537e+08	1.78237e+07
4	90	734642	670404	6.37136e+08	1.79648e+07
5	120	749316	690529	6.35133e+08	1.78146e+07
6	150	748141	700054	6.31467e+08	1.78185e+07
7	180	735608	704694	6.31715e+08	1.78458e+07
8	210	485139	465479	6.28448e+08	1.77786e+07
9	240	494629	522990	6.25134e+08	1.77275e+07
10	270	510950	531955	6.26909e+08	1.7769e+07
11	300	538348	511928	6.18311e+08	1.76159e+07
12	330	535321	525329	6.21424e+08	1.76893e+07
13	360	524303	535012	6.19727e+08	1.7682e+07
14	390	560685	534229	6.18063e+08	1.75712e+07
15	690	564810	606046	6.27588e+08	1.78087e+07
16	990	596871	653443	6.35378e+08	1.79461e+07
17	1290	600082	653745	6.26117e+08	1.77141e+07
18	1590	620265	679596	6.4093e+08	1.80153e+07
19	1890	622786	715553	6.41542e+08	1.81482e+07
20	2190	594316	681579	6.27035e+08	1.78625e+07
21	2490	639858	750561	6.38856e+08	1.80992e+07
22	2790	636986	721871	6.3592e+08	1.80462e+07
23	3090	661563	704068	6.30075e+08	1.78977e+07
24	3390	663432	727988	6.29992e+08	1.79261e+07
25	3690	632109	731340	6.23293e+08	1.78863e+07
26	3990	636451	691262	6.20852e+08	1.77421e+07
27	4290	627538	716778	6.3289e+08	1.79919e+07
28	4590	629918	715142	6.28723e+08	1.79582e+07
		Background corrected Data
	Time_(sec)	Roi1-bkgd-corr	Roi2-bkgd-corr	Ref_fluo-bkgd-corr
1	0	362312	314906	2.0339e+08
2	30	389748	311456	1.99338e+08
3	60	363874	304949	1.98999e+08
4	90	350163	285925	1.96134e+08
5	120	368050	309264	1.97817e+08
6	150	366792	318705	1.94055e+08
7	180	353674	322761	1.93632e+08
8	210	104646	84985.3	1.92017e+08
9	240	115229	143590	1.89958e+08
10	270	130661	151667	1.90713e+08
11	300	161335	134915	1.85873e+08
12	330	156737	146745	1.87183e+08
13	360	145876	156586	1.85667e+08
14	390	184629	158172	1.86721e+08
15	690	183672	224909	1.90418e+08
16	990	212793	269364	1.94836e+08
17	1290	220967	274631	1.91268e+08
18	1590	234706	294036	1.98688e+08
19	1890	234382	327149	1.96037e+08
20	2190	212026	299289	1.88544e+08
21	2490	252503	363207	1.94555e+08
22	2790	250765	335650	1.92919e+08
23	3090	278519	321024	1.90719e+08
24	3390	279781	344337	1.8994e+08
25	3690	249311	348541	1.84218e+08
26	3990	256738	311550	1.85317e+08
27	4290	242478	331719	1.91222e+08
28	4590	245580	330804	1.87882e+08
		Bleaching Corrected Data
	Time_(sec)	Roi1-bkgd_bleach-corr	Roi2-bkgd_bleach-corr
1	0	0.00178137	0.00154829
2	30	0.00195521	0.00156245
3	60	0.00182852	0.00153242
4	90	0.00178533	0.00145781
5	120	0.00186056	0.00156339
6	150	0.00189014	0.00164234
7	180	0.00182653	0.00166688
8	210	0.000544982	0.000442592
9	240	0.000606603	0.000755905
10	270	0.000685121	0.000795262
11	300	0.000867986	0.000725847
12	330	0.000837342	0.000783965
13	360	0.000785688	0.000843371
14	390	0.000988792	0.000847102
15	690	0.000964571	0.00118113
16	990	0.00109216	0.00138252
17	1290	0.00115527	0.00143584
18	1590	0.00118128	0.00147989
19	1890	0.0011956	0.00166881
20	2190	0.00112454	0.00158737
21	2490	0.00129785	0.00186686
22	2790	0.00129984	0.00173985
23	3090	0.00146037	0.00168323
24	3390	0.001473	0.00181287
25	3690	0.00135334	0.001892
26	3990	0.0013854	0.00168117
27	4290	0.00126805	0.00173473
28	4590	0.0013071	0.0017607
		Normalized Data
	Time_(sec)	Roi1_corr_norm	Roi2_corr_norm
1	0	1	1
2	30	1.09759	1.00915
3	60	1.02647	0.989747
4	90	1.00222	0.941559
5	120	1.04446	1.00975
6	150	1.06106	1.06075
7	180	1.02535	1.07659
8	210	0.305934	0.285859
9	240	0.340526	0.488219
10	270	0.384603	0.513639
11	300	0.487258	0.468806
12	330	0.470055	0.506343
13	360	0.441058	0.544711
14	390	0.555074	0.547121
15	690	0.541478	0.762861
16	990	0.613104	0.892934
17	1290	0.648531	0.927372
18	1590	0.663129	0.955822
19	1890	0.671167	1.07784
20	2190	0.63128	1.02524
21	2490	0.728569	1.20576
22	2790	0.729687	1.12372
23	3090	0.8198	1.08716
24	3390	0.82689	1.17089
25	3690	0.759721	1.22199
26	3990	0.777716	1.08582
27	4290	0.711839	1.12042
28	4590	0.733759	1.13719
		Normalize the bouton fluorescent right after bleaching to 0
	Recovery Time_(sec)
1	0	0	0
2	30	0.0473346	0.278485
3	60	0.107648	0.313467
4	90	0.248116	0.251769
5	120	0.224577	0.303426
6	150	0.184899	0.356229
7	180	0.340913	0.359545
8	480	0.322308	0.656443
9	780	0.42032	0.835447
10	1080	0.468796	0.882839
11	1380	0.488771	0.921992
12	1680	0.49977	1.08991
13	1980	0.445191	1.01753
14	2280	0.578316	1.26595
15	2580	0.579847	1.15305
16	2880	0.703154	1.10273
17	3180	0.712855	1.21796
18	3480	0.620944	1.28829
19	3780	0.645568	1.1009
20	4080	0.555424	1.14851
21	4380	0.585419	1.17158

## Sheet: sham-0708-C1
		Raw Data
	Time_(sec)	Roi1	Ref_fluo	Background
1	0	583066	486542340	33089658
2	30	562927	4.76175e+08	3.32682e+07
3	60	573258	4.68956e+08	3.30095e+07
4	90	571719	4.64456e+08	3.27982e+07
5	120	555442	4.59041e+08	3.28846e+07
6	150	560918	4.58602e+08	3.27876e+07
7	180	544985	4.554e+08	3.29061e+07
8	210	405927	4.50413e+08	3.27697e+07
9	240	417827	4.52037e+08	3.27198e+07
10	270	412877	4.51331e+08	3.28454e+07
11	300	431701	4.56096e+08	3.28324e+07
12	330	428306	4.57045e+08	3.28869e+07
13	360	430338	4.5968e+08	3.29377e+07
14	390	442126	4.63355e+08	3.28916e+07
15	690	446610	4.67339e+08	3.28224e+07
16	990	485130	4.82333e+08	3.3095e+07
17	1290	506271	4.92787e+08	3.31457e+07
18	1590	506697	4.84645e+08	3.28137e+07
19	1890	515218	4.97043e+08	3.32008e+07
20	2190	532986	5.02372e+08	3.32484e+07
21	2490	556829	4.92527e+08	3.30034e+07
22	2790	505002	5.06538e+08	3.32641e+07
23	3090	541191	5.08461e+08	3.32069e+07
24	3390	507545	4.92227e+08	3.28127e+07
25	3690	531945	5.05179e+08	3.29909e+07
26	3990	543130	5.07158e+08	3.31438e+07
27	4290	492938	4.99979e+08	3.30468e+07
28	4590	510070	5.08963e+08	3.32481e+07
		Background corrected Data
	Time_(sec)	Roi1-bkgd-corr	Ref_fluo-bkgd-corr
1	0	243685	3.35925e+08
2	30	221714	3.24745e+08
3	60	234699	3.18704e+08
4	90	235327	3.15165e+08
5	120	218164	3.09357e+08
6	150	224635	3.09359e+08
7	180	207486	3.05618e+08
8	210	69827.5	3.01252e+08
9	240	82239.4	3.03103e+08
10	270	76001.2	3.01826e+08
11	300	94958.8	3.0665e+08
12	330	91004.1	3.07351e+08
13	360	92514.9	3.09754e+08
14	390	104776	3.13639e+08
15	690	109970	3.17938e+08
16	990	145695	3.31692e+08
17	1290	166315	3.41914e+08
18	1590	170146	3.35284e+08
19	1890	174697	3.45919e+08
20	2190	191977	3.51032e+08
21	2490	218334	3.42303e+08
22	2790	163832	3.55127e+08
23	3090	200607	3.5731e+08
24	3390	171005	3.42871e+08
25	3690	193578	3.55012e+08
26	3990	203194	3.56294e+08
27	4290	153996	3.49556e+08
28	4590	169064	3.57624e+08
		Bleaching Corrected Data
	Time_(sec)	Roi1-bkgd_bleach-corr
1	0	0.000725415
2	30	0.000682734
3	60	0.000736417
4	90	0.00074668
5	120	0.000705218
6	150	0.00072613
7	180	0.000678907
8	210	0.000231791
9	240	0.000271325
10	270	0.000251805
11	300	0.000309665
12	330	0.000296092
13	360	0.000298672
14	390	0.000334067
15	690	0.000345884
16	990	0.000439247
17	1290	0.000486424
18	1590	0.000507468
19	1890	0.000505021
20	2190	0.000546892
21	2490	0.000637837
22	2790	0.000461335
23	3090	0.000561438
24	3390	0.000498744
25	3690	0.000545271
26	3990	0.000570298
27	4290	0.000440549
28	4590	0.000472742
		Normalized Data
	Time_(sec)	Roi1_corr_norm
1	0	1
2	30	0.941163
3	60	1.01517
4	90	1.02931
5	120	0.972159
6	150	1.00099
7	180	0.935888
8	210	0.31953
9	240	0.374027
10	270	0.347118
11	300	0.426881
12	330	0.408169
13	360	0.411726
14	390	0.460518
15	690	0.476809
16	990	0.605512
17	1290	0.670546
18	1590	0.699555
19	1890	0.696183
20	2190	0.753903
21	2490	0.879273
22	2790	0.635961
23	3090	0.773954
24	3390	0.68753
25	3690	0.751668
26	3990	0.786168
27	4290	0.607306
28	4590	0.651685
		Normalize the bouton fluorescent right after bleaching to 0
	Recovery Time_(sec)
1	0	0
2	30	0.0818993
3	60	0.0414602
4	90	0.161327
5	120	0.133207
6	150	0.138552
7	180	0.211878
8	480	0.23636
9	780	0.429774
10	1080	0.527507
11	1380	0.571103
12	1680	0.566035
13	1980	0.652777
14	2280	0.841182
15	2580	0.475533
16	2880	0.682909
17	3180	0.553031
18	3480	0.649418
19	3780	0.701264
20	4080	0.43247
21	4380	0.499163

## Sheet: sham-0709-C4
		Raw Data
	Time_(sec)	Roi1	Roi2	Ref_fluo	Background
1	0	674714	792078	437440607	41620413
2	30	666074	758444	4.34637e+08	4.16042e+07
3	60	660556	773925	4.33899e+08	4.15863e+07
4	90	658144	749061	4.31327e+08	4.14527e+07
5	120	646051	728088	4.30067e+08	4.16986e+07
6	150	636302	752746	4.27441e+08	4.17991e+07
7	180	624754	749217	4.2625e+08	4.1516e+07
8	210	486681	469578	4.22265e+08	4.14742e+07
9	240	514688	518861	4.21865e+08	4.14648e+07
10	270	559197	505536	4.20215e+08	4.1484e+07
11	300	567935	523406	4.23688e+08	4.16676e+07
12	330	541403	523276	4.21265e+08	4.15902e+07
13	360	546727	523779	4.20334e+08	4.1601e+07
14	390	565114	520693	4.18955e+08	4.14978e+07
15	690	581949	590903	4.22203e+08	4.17958e+07
16	990	597646	606800	4.21528e+08	4.1475e+07
17	1290	599776	608108	4.17243e+08	4.14026e+07
18	1590	606379	598605	4.14462e+08	4.15411e+07
19	1890	609812	648895	4.06633e+08	4.14389e+07
20	2190	585757	596489	4.00617e+08	4.1441e+07
21	2490	542738	603957	3.96033e+08	4.15444e+07
22	2790	564588	595195	4.32691e+08	4.16235e+07
23	3090	605241	679824	4.49631e+08	4.17482e+07
24	3390	623772	689168	4.51089e+08	4.15585e+07
25	3690	625294	693702	4.47941e+08	4.16163e+07
26	3990	562215	716838	4.46198e+08	4.16702e+07
27	4290	634127	675820	4.3896e+08	4.15925e+07
28	4590	622078	700577	4.45251e+08	4.15948e+07
		Background corrected Data
	Time_(sec)	Roi1-bkgd-corr	Roi2-bkgd-corr	Ref_fluo-bkgd-corr
1	0	355723	473087	2.05618e+08
2	30	347207	439577	2.02904e+08
3	60	341826	455195	2.02267e+08
4	90	340437	431355	2.00438e+08
5	120	326460	408497	1.97809e+08
6	150	315941	432385	1.94623e+08
7	180	306562	431025	1.95009e+08
8	210	168810	151707	1.91256e+08
9	240	196889	201062	1.90909e+08
10	270	241251	187591	1.89152e+08
11	300	248581	204053	1.91602e+08
12	330	222643	204517	1.89611e+08
13	360	227884	204936	1.88619e+08
14	390	247062	202641	1.87815e+08
15	690	261613	270567	1.89403e+08
16	990	279769	288923	1.90515e+08
17	1290	282454	290786	1.86633e+08
18	1590	287996	280221	1.8308e+08
19	1890	292212	331295	1.75821e+08
20	2190	268141	278872	1.69794e+08
21	2490	224329	285548	1.64633e+08
22	2790	245573	276181	2.00851e+08
23	3090	285270	359853	2.17097e+08
24	3390	305256	370652	2.19611e+08
25	3690	306334	374742	2.16141e+08
26	3990	242842	397465	2.14098e+08
27	4290	315349	357042	2.07292e+08
28	4590	303283	381782	2.13571e+08
		Bleaching Corrected Data
	Time_(sec)	Roi1-bkgd_bleach-corr	Roi2-bkgd_bleach-corr
1	0	0.00173002	0.00230081
2	30	0.00171118	0.00216642
3	60	0.00168998	0.00225047
4	90	0.00169846	0.00215206
5	120	0.00165038	0.00206511
6	150	0.00162335	0.00222165
7	180	0.00157204	0.00221029
8	210	0.000882636	0.000793213
9	240	0.00103133	0.00105318
10	270	0.00127543	0.000991745
11	300	0.00129738	0.00106498
12	330	0.00117421	0.00107861
13	360	0.00120817	0.00108651
14	390	0.00131546	0.00107894
15	690	0.00138125	0.00142853
16	990	0.00146849	0.00151654
17	1290	0.00151342	0.00155806
18	1590	0.00157306	0.00153059
19	1890	0.00166199	0.00188427
20	2190	0.00157921	0.00164242
21	2490	0.0013626	0.00173445
22	2790	0.00122266	0.00137505
23	3090	0.00131402	0.00165757
24	3390	0.00138999	0.00168776
25	3690	0.00141729	0.00173379
26	3990	0.00113426	0.00185646
27	4290	0.00152128	0.00172241
28	4590	0.00142006	0.00178761
		Normalized Data
	Time_(sec)	Roi1_corr_norm	Roi2_corr_norm
1	0	1	1
2	30	0.989112	0.941592
3	60	0.976854	0.978123
4	90	0.981759	0.935348
5	120	0.953968	0.897559
6	150	0.93834	0.965597
7	180	0.908686	0.960657
8	210	0.510188	0.344754
9	240	0.596135	0.457745
10	270	0.737236	0.431042
11	300	0.749923	0.462873
12	330	0.678727	0.468798
13	360	0.698358	0.472229
14	390	0.76037	0.468941
15	690	0.798403	0.62088
16	990	0.848827	0.659132
17	1290	0.874797	0.677179
18	1590	0.90927	0.66524
19	1890	0.960674	0.818962
20	2190	0.91283	0.713844
21	2490	0.787622	0.753844
22	2790	0.706733	0.597638
23	3090	0.759542	0.720431
24	3390	0.80345	0.733553
25	3690	0.819233	0.753556
26	3990	0.655633	0.806874
27	4290	0.879341	0.74861
28	4590	0.820834	0.776951
		Normalize the bouton fluorescent right after bleaching to 0
	Recovery Time_(sec)
1	0	0	0
2	30	0.189346	0.185422
3	60	0.5002	0.141601
4	90	0.52815	0.193838
5	120	0.371302	0.20356
6	150	0.414549	0.209191
7	180	0.551164	0.203794
8	480	0.634953	0.453133
9	780	0.746041	0.515905
10	1080	0.803256	0.545521
11	1380	0.879202	0.52593
12	1680	0.992447	0.778192
13	1980	0.887044	0.60569
14	2280	0.611202	0.671332
15	2580	0.433	0.414992
16	2880	0.549341	0.616499
17	3180	0.646073	0.638034
18	3480	0.680844	0.670858
19	3780	0.320423	0.758356
20	4080	0.813265	0.662742
21	4380	0.684371	0.709251

[truncated: 37 more sheets: sham-0712-C1, ITSN-SH3B-0523-C2, ITSN-SH3B-0524-C2, ITSN-SH3B-0524-C4, ITSN-SH3B-0608-C2, ITSN-SH3B-0608-C6, ITSN-SH3B-0609-C4, ITSN-SH3B-0611-C3, ITSN-SH3B-0612-C2, ITSN-SH3B-0705-C1, ITSN-SH3B-0708-C2, ITSN-SH3B-0709-C3, ITSN-SH3B-0712-C2, ITSN-SH3B-0712-C5, ITSN-SH3B-0720-C1, ITSN-SH3B-0720-C2, Endo-SH3-WT-0520-C7, Endo-SH3-WT-0608-C3, Endo-SH3-WT-0609-C2, Endo-SH3-WT-0609-C5 …]
