# Supplementary material for: A proline-rich motif on VGLUT1 reduces synaptic vesicle super-pool and spontaneous release frequency
Source: eLife journal article supplement (doi:10.7554/elife.50401), 2019-10-30
Supplement: supp [file elife-50401-supp-v1.zip › elife_poa_e50401_Supplementary_file_2.xlsx]

## Sheet: cell properties
Rescue	Leak current (LC)	Access Resistance (AR)	Membrane Resistance (MR)	Tau
﻿AAV-TM	-116	-956	-41	1.28
AAV-TM	-40	-1030	-60	2.9
AAV-TM	-67	-872	-45	1.75
AAV-TM	-16	-1103	-41	1.89
AAV-TM	4	-1340	-48	2.01
AAV-TM	-4	-1130	-45	2.16
AAV-TM	-56	-1348	-40	1.99
AAV-TM	16	-1128	-35	1.51
AAV-TM	-113	-1218	-43	2
AAV-TM	-47	-752	-42	1.5
AAV-TM	-70	-1109	-46	1.48
AAV-TM	-62	-1029	-39	1.85
AAV-TM	5	-1052	-25	0.6881
AAV-TM	-18	-1060	-28	0.8196
AAV-TM	-35	-1056	-27	0.6509
AAV-TM	-30	-1072	-45	1.5362
AAV-TM	-46	-995	-50	1.7193
AAV-TM	-140	-1110	-50	1.3586
AAV-TM	-310	-835	-105	1.6723
AAV-TM	-70	-860	-28	0.9323
AAV-TM	-45	-958	-36	1.5749
AAV-TM	-80	-858	-60	0.9253
AAV-TM	-198	-847	-65	1.3539
AAV-TM	-204	-1070	-68	1.5881
AAV-TM	-49	-950	-29	1.44
AAV-TM	-40	-844	-30	1.73
AAV-TM	-35	-1006	-34	1.51
AAV-TM	-192	-945	-60	1.36
AAV-TM	8	-1173	-29	1.79
AAV-TM	-160	-1032	-51	1.8
AAV-TM	-157	-1095	-59	1.73
AAV-TM	-445	-630	-106	1.03
AAV-TM	-189	-797	-85	1.81
AAV-TM	-2	-898	-33	1.51
AAV-TM	-73	-1500	-24	0.98
AAV-TM	-68	-1346	-44	2.34
AAV-TM	2	-815	-15	0.5441
AAV-TM	-22	-775	-18	0.6507
AAV-TM	-40	1345	-40	0.7005
AAV-TM	-105	-920	-35	1.0861
AAV-TM	-58	-825	-34	0.5389
AAV-TM	15	-925	-22	0.6018
AAV-TM	-44	-828	-16	0.6753
AAV-TM	-10	-928	-20	0.4975
AAV-TM	-60	-759	-22	1.2316
AAV-TM	-20	-865	-30	0.6724
AAV-TM	-50	-504	-30	0.5071
AAV-TM	-60	-800	-50	0.9392
AAV-TM	24	-835	-38	1.0532
AAV-TM	-104	-1095	-33	0.9823
AAV-TM	-5	-808	-20	1.0725
AAV-TM	-50	-907	-16	0.4359
AAV-TM	-20	-835	-20	0.7045
AAV-TM	22	-880	-25	1.1236
AAV-TM	-101	-855	-42	0.7488
AAV-TM	-20	-960	-45	1.264
Mean	-68.75	-924.607	-40.4821	1.28928
Rescue	Leak current (LC)	Access Resistance (AR)	Membrane Resistance (MR)	Tau
AAV-WT	-1	-1133	-45	1.61
AAV-WT	-71	-1488	-139	2.73
AAV-WT	-23	-889	-34	2.22
AAV-WT	-210	-1245	-94	2.28
AAV-WT	-7	-1127	-45	1.77
AAV-WT	-14	-1036	-62	1.44
AAV-WT	-60	-1340	-65	1.66
AAV-WT	-48	-1062	-26	1.47
AAV-WT	-105	-921	-36	1.19
AAV-WT	-213	-1424	-147	2.08
AAV-WT	-29	-1191	-67	2.4
AAV-WT	-410	-801	-108	2.12
AAV-WT	-100	-835	-53	1.52
AAV-WT	-71	-776	-56	1.28
AAV-WT	-28	-858	-43	1.78
AAV-WT	-165	-1211	-82	2.44
AAV-WT	-94	-833	-67	1.05
AAV-WT	-5	-1092	-46	2.42
AAV-WT	-248	-973	-51	1.72
AAV-WT	-305	-1010	-78	2.5
AAV-WT	-115	-1100	-27	1.19
AAV-WT	-60	-956	-24	1.49
AAV-WT	-101	-1238	-70	1.8
AAV-WT	0	-859	-37	1.93
AAV-WT	-37	-975	-34	1.82
AAV-WT	-13	-867	-34	2.13
AAV-WT	-28	-313	-5	0.81
AAV-WT	-87	-1233	-37	2.1
AAV-WT	-52	-1272	-43	1.68
AAV-WT	-126	-1323	-205	1.63
AAV-WT	-69	-1090	-62	2.25
AAV-WT	-18	-1017	-44	2.57
Mean	-91.0312	-1046.5	-61.4375	1.84625
Rescue	Leak current (LC)	Access Resistance (AR)	Membrane Resistance (MR)	Tau
Lenti-P554A	-106	-919	-85	1.96
Lenti-P554A	25	-1074	-65	2.2
Lenti-P554A	-20	-1404	-50	2.1
Lenti-P554A	-55	-1036	-36	1.54
Lenti-P554A	-151	-1353	-44	1.94
Lenti-P554A	-196	-1167	-40	1.08
Lenti-P554A	-65	-1036	-24	1.57
Lenti-P554A	-27	-978	-39	1.45
Lenti-P554A	-56	-1184	-78	1.78
Lenti-P554A	-58	-916	-49	0.97
Lenti-P554A	-79	-1344	-89	1.8
Lenti-P554A	11	-1144	-50	1.97
Lenti-P554A	-65	-1421	-70	2.68
Lenti-P554A	-356	-864	-86	1.75
Lenti-P554A	-140	-975	-45	0.5842
Lenti-P554A	-25	-879	-30	1.0922
Lenti-P554A	-170	-1195	-55	1.1532
Lenti-P554A	-12	-953	-70	0.9321
Lenti-P554A	-243	-845	-60	1.3936
Lenti-P554A	-40	-1080	-35	0.9896
Lenti-P554A	-150	-902	-100	1.2642
Lenti-P554A	-92	-810	-80	2.1993
Lenti-P554A	-82	-860	-75	1.1731
Lenti-P554A	-37	-721	-27	0.69
Lenti-P554A	12	-868	-17	1.86
Lenti-P554A	-9	-1219	-33	2
Lenti-P554A	-20	-919	-18	1.62
Lenti-P554A	-8	-1005	-26	1.34
Lenti-P554A	-21	-980	-38	1.38
Lenti-P554A	-130	-844	-103	1.4
Lenti-P554A	-314	-1085	-80	1.78
Lenti-P554A	-288	-1096	-94	1.61
Lenti-P554A	-90	-1505	-72	2.35
Lenti-P554A	-14	-922	-36	1.71
Lenti-P554A	-212	-881	-84	1.92
Lenti-P554A	-86	-978	-33	1.3
Lenti-P554A	-361	-783	-70	1.79
Lenti-P554A	-320	-690	-55	0.88
Lenti-P554A	-62	-1096	-30	0.8
Lenti-P554A	-62	-1285	-22	0.56
Lenti-P554A	-81	-778	-25	0.8378
Lenti-P554A	-128	-1075	-40	0.7476
Lenti-P554A	-41	1065	-25	0.7951
Lenti-P554A	18	-870	-20	0.8722
Lenti-P554A	-85	-1045	-40	1.0633
Lenti-P554A	-80	-802	-40	1.2228
Lenti-P554A	-90	-752	-65	0.9642
Lenti-P554A	-52	-775	-28	1.36
Lenti-P554A	-30	-742	-21	0.5937
Lenti-P554A	-58	-960	-35	missing
Lenti-P554A	-25	-900	-24	missing
Lenti-P554A	-158	-890	-50	0.8733
Lenti-P554A	-166	-815	-40	0.7778
Lenti-P554A	-125	-752	-48	1.0016
Lenti-P554A	12	-942	-55	0.7752
Lenti-P554A	-65	-828	-20	1.3431
Mean	-947.804	-49.4464	1.36647	1.36647
Rescue	Leak current (LC)	Access Resistance (AR)	Membrane Resistance (MR)	Tau
Lenti-sham	-105	-1410	-80	1.31
Lenti-sham	14	-1096	-30	1.62
Lenti-sham	-48	-1450	-77	1.91
Lenti-sham	-94	-1025	-66	0.95
Lenti-sham	-51	-1136	-46	1.59
Lenti-sham	68	-1247	-46	2.27
Lenti-sham	-32	-957	-44	1.71
Lenti-sham	-26	-1286	-54	2.66
Lenti-sham	-14	-1091	-42	2.13
Lenti-sham	-58	-1240	-53	1.08
Lenti-sham	28	-1209	-50	2.49
Lenti-sham	-80	-1065	-87	2.47
Lenti-sham	-15	-1243	-43	1.88
Lenti-sham	-97	-1070	-61	2.69
Lenti-sham	2	-1145	-32	1.4273
Lenti-sham	12	-1205	-30	1.7513
Lenti-sham	-80	-650	-55	0.7543
Lenti-sham	-110	-1045	-45	0.7187
Lenti-sham	-108	-1089	-39	1.0259
Lenti-sham	-70	-1302	-43	1.1185
Lenti-sham	-10	-1038	-90	1.8567
Lenti-sham	-25	-787	-38	1.64
Lenti-sham	-10	-1252	-34	1.33
Lenti-sham	-30	-1145	-39	2.15
Lenti-sham	8	-913	-20	1.5
Lenti-sham	-143	-605	-53	1.94
Lenti-sham	-128	-982	-46	1.89
Lenti-sham	7	-1086	-25	2.17
Lenti-sham	-196	-822	-58	2.62
Lenti-sham	-15	-515	-38	1.11
Lenti-sham	-18	-1122	-25	1.81
Lenti-sham	25	-964	-26	2.02
Lenti-sham	0	-1098	-40	2.05
Lenti-sham	-13	-832	-30	1.24
Lenti-sham	-112	-1155	-48	1.47
Lenti-sham	-11	-1276	-30	2
Lenti-sham	-220	1145	-55	0.4907
Lenti-sham	-146	-857	-50	0.8776
Lenti-sham	-42	-1020	-45	0.8724
Lenti-sham	-83	-905	-40	0.5802
Lenti-sham	-46	-1012	-30	0.8101
Lenti-sham	-80	-668	-22	0.9215
Lenti-sham	-165	-695	-37	0.6044
Lenti-sham	-15	-792	-16	0.5594
Lenti-sham	-95	-1402	-42	1.3524
Lenti-sham	-28	-890	-20	0.8321
Lenti-sham	-30	-1115	-35	0.5559
Lenti-sham	-95	-965	-35	missing
Lenti-sham	-27	-1025	-30	missing
Lenti-sham	-140	-870	-35	0.9923
Lenti-sham	-75	-950	-30	0.6293
Lenti-sham	-45	-985	-35	0.9863
Lenti-sham	-90	-940	-40	1.1175
Lenti-sham	-255	-810	-50	0.7232
Mean	-987.204	-42.7778	1.44727	1.44727
Rescue	Leak current (LC)	Access Resistance (AR)	Membrane Resistance (MR)	Tau
Lenti-WT	-168	-1195	-62	1.81
Lenti-WT	-3	-903	-23	1.37
Lenti-WT	-45	-1184	-44	1.91
Lenti-WT	-144	-1371	-40	1.62
Lenti-WT	-107	-1142	-43	1.33
Lenti-WT	5	-1063	-34	2
Lenti-WT	-86	-853	-50	1.12
Lenti-WT	-37	-1161	-36	2.02
Lenti-WT	-51	-1400	-46	2
Lenti-WT	-22	-902	-28	1.8
Lenti-WT	-5	-1257	-44	2.35
Lenti-WT	1	-861	-49	1.49
Lenti-WT	-105	-916	-72	1.44
Lenti-WT	-255	-1103	-43	1.73
Lenti-WT	-21	-1001	-20	1.6
Lenti-WT	-49	-849	-40	1.77
Lenti-WT	12	-921	-41	1.87
Lenti-WT	-25	-722	-33	1.3617
Lenti-WT	-90	-925	-62	1.4264
Lenti-WT	-48	-967	-22	0.9395
Lenti-WT	-90	-1111	-50	1.1339
Lenti-WT	-2	-1302	-35	1.1467
Lenti-WT	-90	-1102	-48	1.212
Lenti-WT	-90	-1075	-25	1.625
Lenti-WT	-80	-982	-40	0.9447
Lenti-WT	-42	-1254	-57	1.58
Lenti-WT	-10	-915	-23	1.58
Lenti-WT	-96	-840	-56	1.17
Lenti-WT	-6	-903	-27	1.35
Lenti-WT	-288	-982	-78	1.29
Lenti-WT	-32	-1057	-34	1.06
Lenti-WT	-68	-916	-70	1.42
Lenti-WT	-386	-1197	-81	1.4
Lenti-WT	-83	-861	-48	1.27
Lenti-WT	-39	-1237	-39	1.98
Lenti-WT	0	-905	-74	1.89
Lenti-WT	-121	-1024	-48	2.23
Lenti-WT	-27	-958	-41	2.35
Lenti-WT	-365	-1469	-95	1.73
Lenti-WT	-11	-1062	-48	2.02
Lenti-WT	-400	-922	-80	0.7603
Lenti-WT	-75	-1021	-60	1.0847
Lenti-WT	-125	-898	-40	0.7909
Lenti-WT	-220	-948	-50	1.0482
Lenti-WT	-55	-885	-75	0.8273
Lenti-WT	1	-975	-21	0.9117
Lenti-WT	-90	-970	-55	0.9784
Lenti-WT	-90	-727	-30	1.143
Lenti-WT	-42	-980	-25	0.6909
Lenti-WT	-16	-560	-42	0.7728
Lenti-WT	-16	-740	-55	1.1076
Lenti-WT	-3	-945	-25	0.9238
Lenti-WT	-30	-1027	-30	1.1616
Lenti-WT	-120	-1030	-45	1.4675
Lenti-WT	-150	-915	-35	0.5924
Lenti-WT	-75	-810	-35	1.146
Lenti-WT	-120	-875	-30	0.8816
Lenti-WT	-82	-862	-37	1.8151
Lenti-WT	-70	-878	-26	0.4725
Mean	-996.881	-44.8305	1.38841	1.38841

## Sheet: Statistics
Rescue	Leak current (LC)	Access Resistance (AR)	Membrane Resistance (MR)	Tau	n
AAV WT	-91.0312	-1046.5	-61.4375	1.84625	32
AAV TM	-68.75	-924.607	-40.4821	1.28928	56
Lenti WT	-83.8475	-996.881	-44.8305	1.38841	59
Lenti sham	-59.4815	-987.204	-42.7778	1.44727	54
Lenti P554A	-95.1429	-947.804	-49.4464	1.36647	57
One way ANOVA on Ranks	ns	ns	p=0,027 AAV WT vs TM	p<0,001 AAV WT vs others
				Dunn's	Dunn's
