# Supplementary figures and images for: A proline-rich motif on VGLUT1 reduces synaptic vesicle super-pool and spontaneous release frequency
Source: eLife journal article supplement (doi:10.7554/elife.50401), 2019-10-30

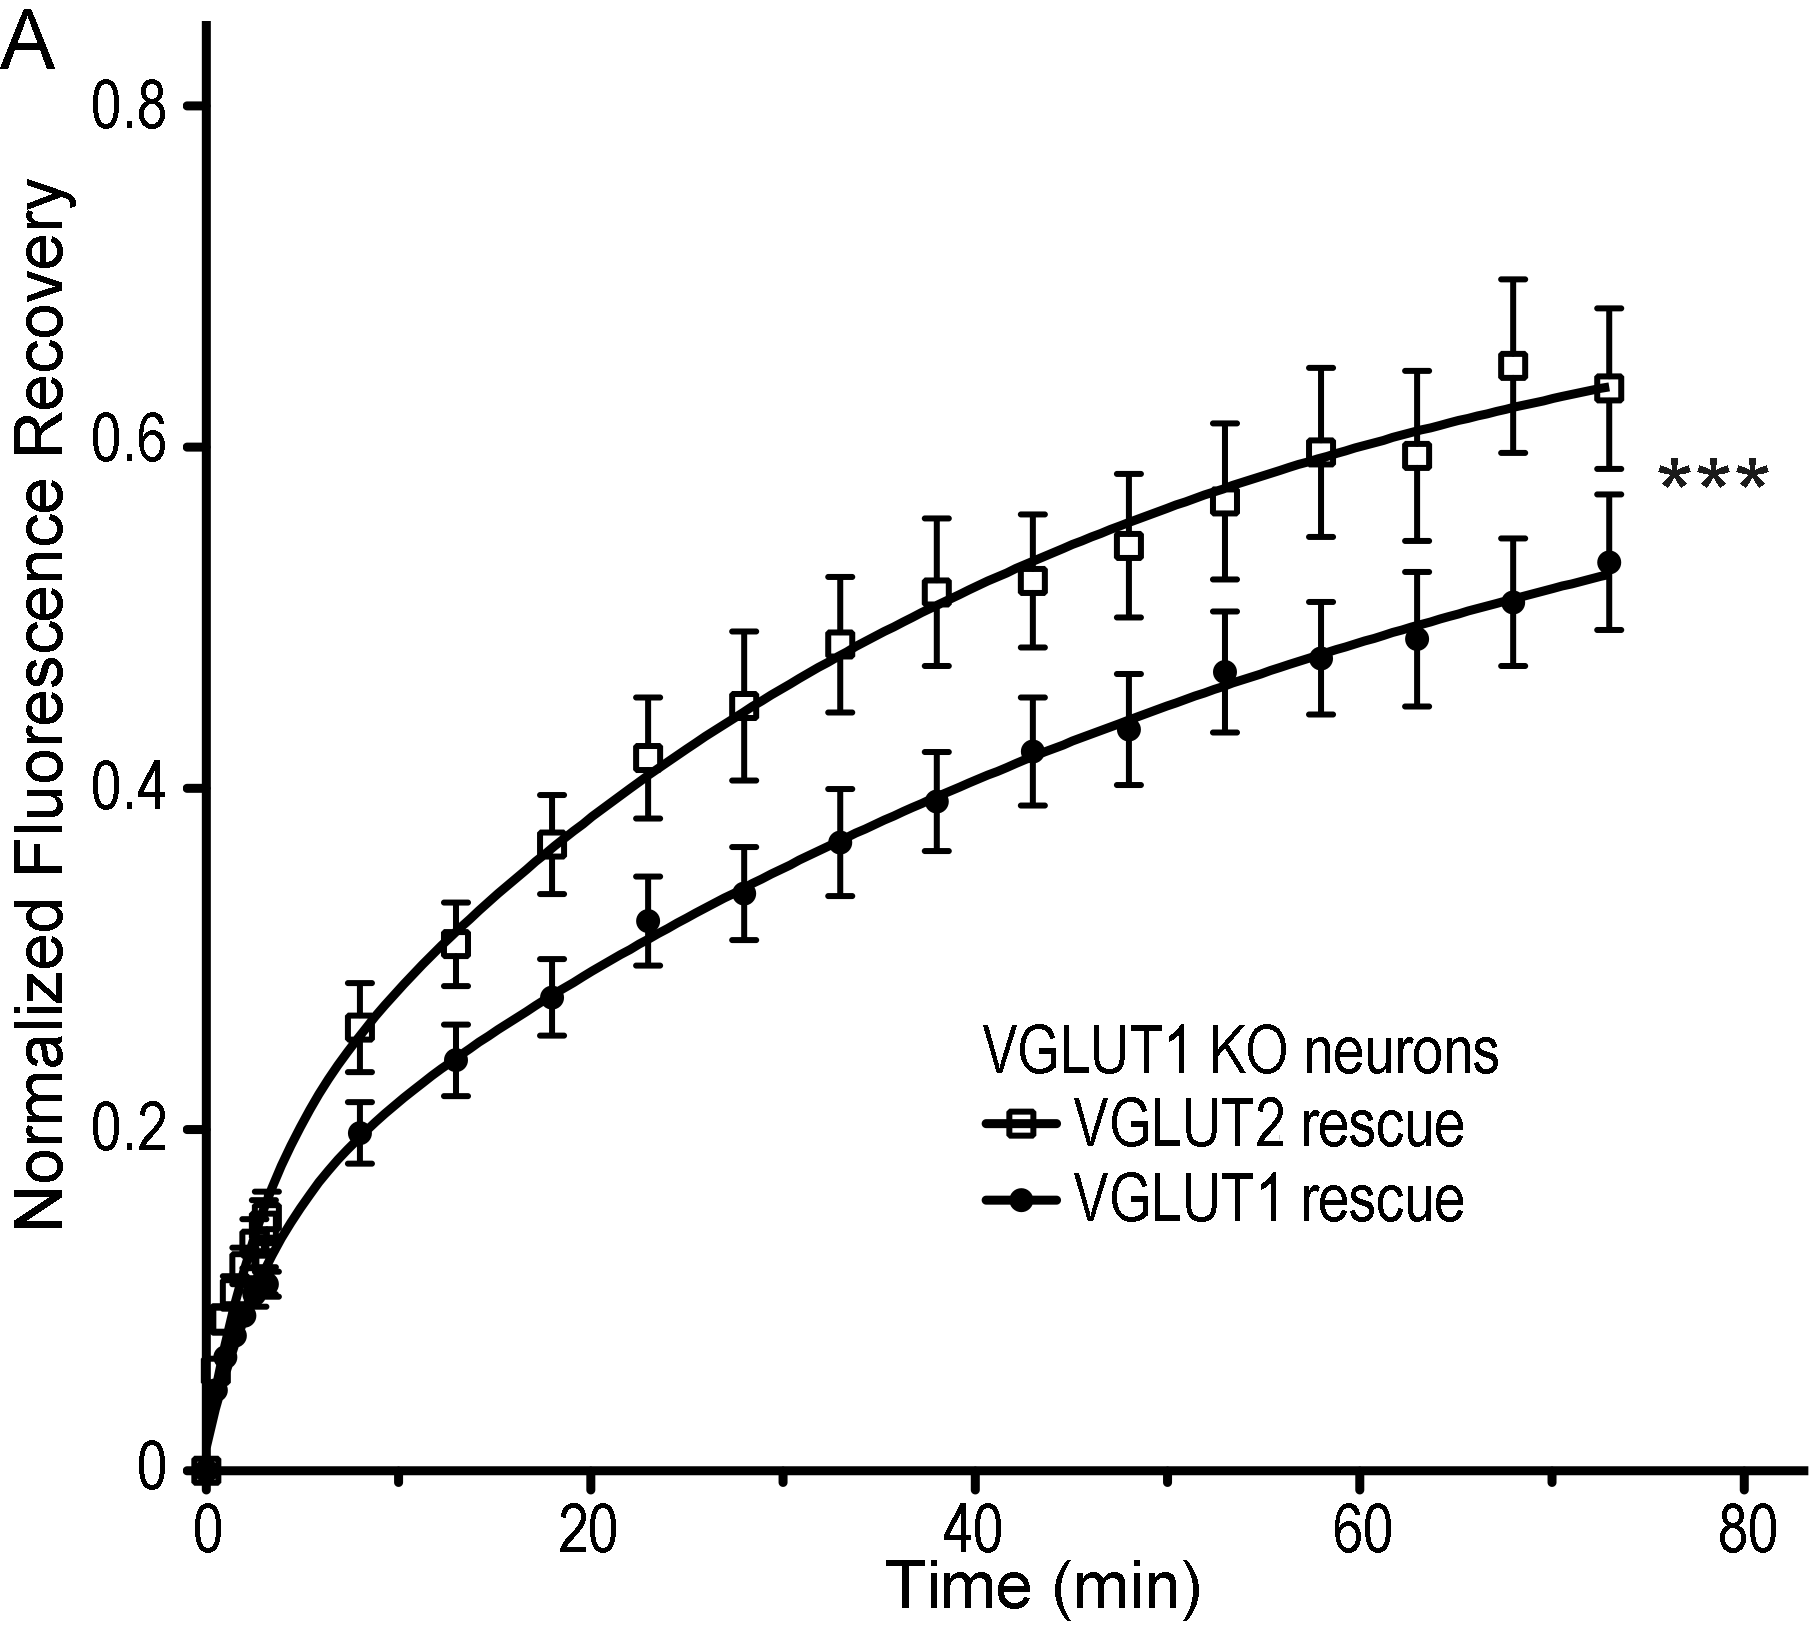

Supplement: supp [file elife-50401-supp-v1.zip › elife_poa_e50401_Figure_1_figure_supplement_1.tif]

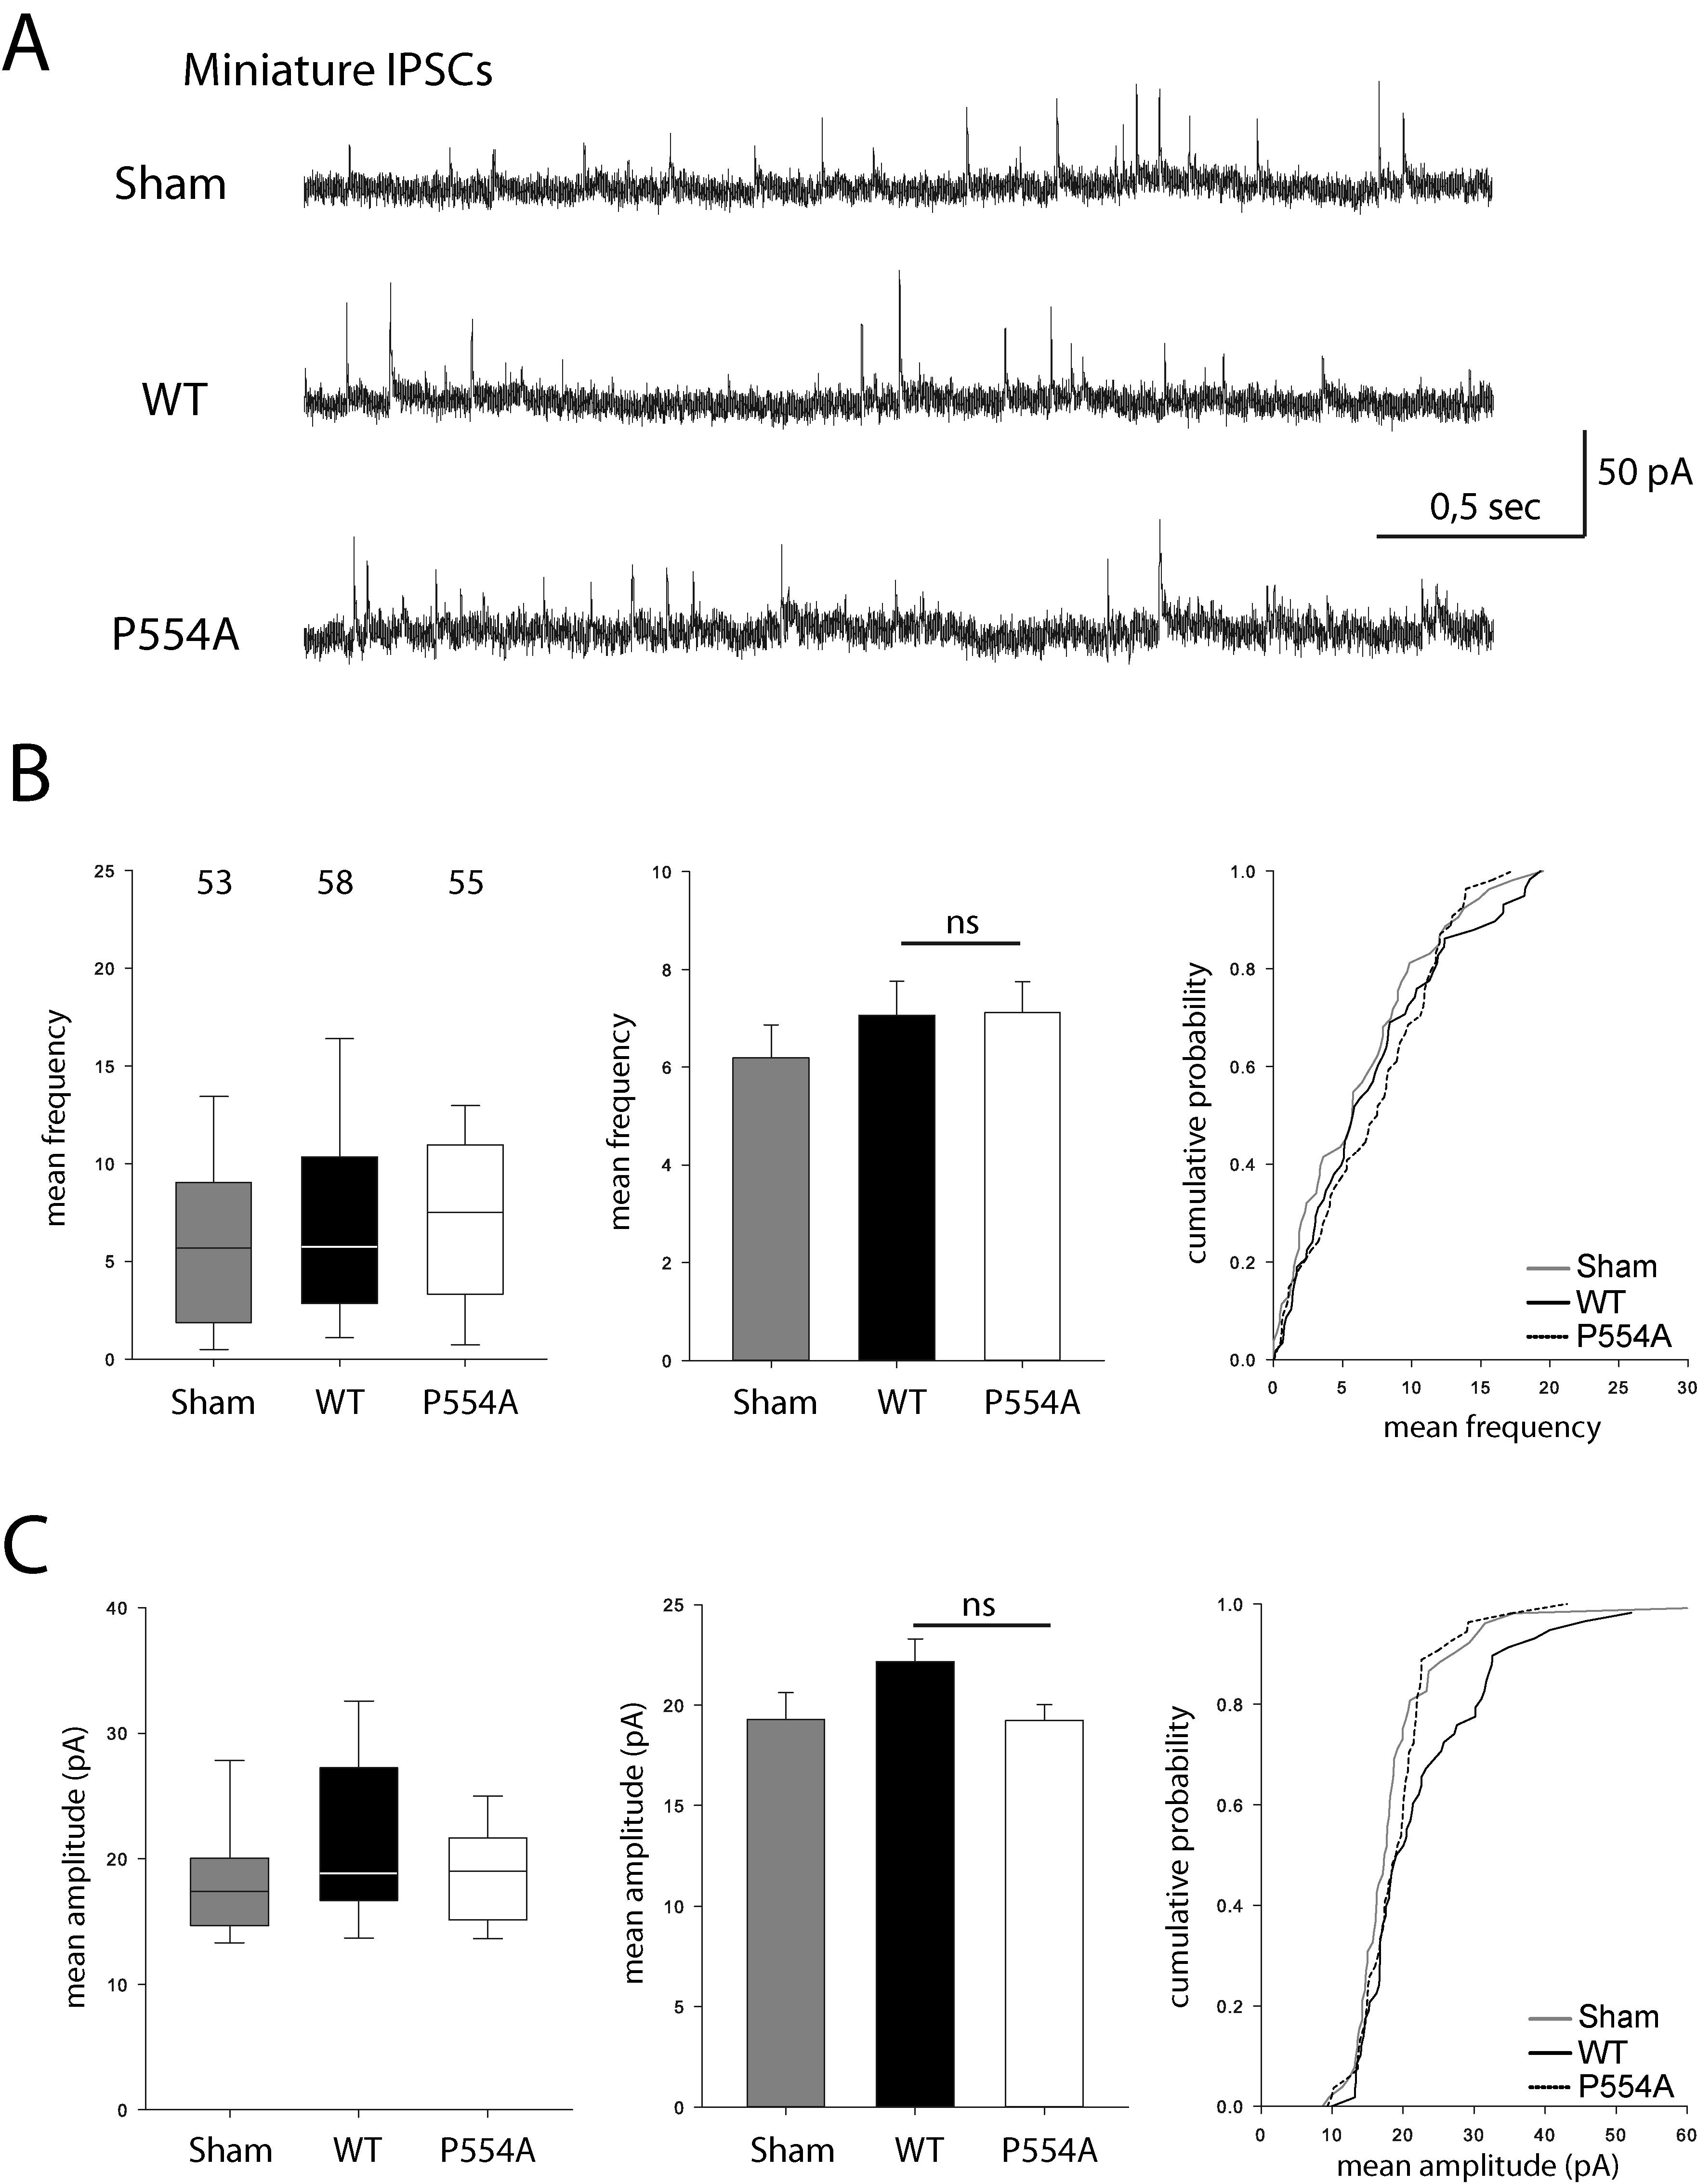

Supplement: supp [file elife-50401-supp-v1.zip › elife_poa_e50401_Figure_4_figure_supplement_2.tif]

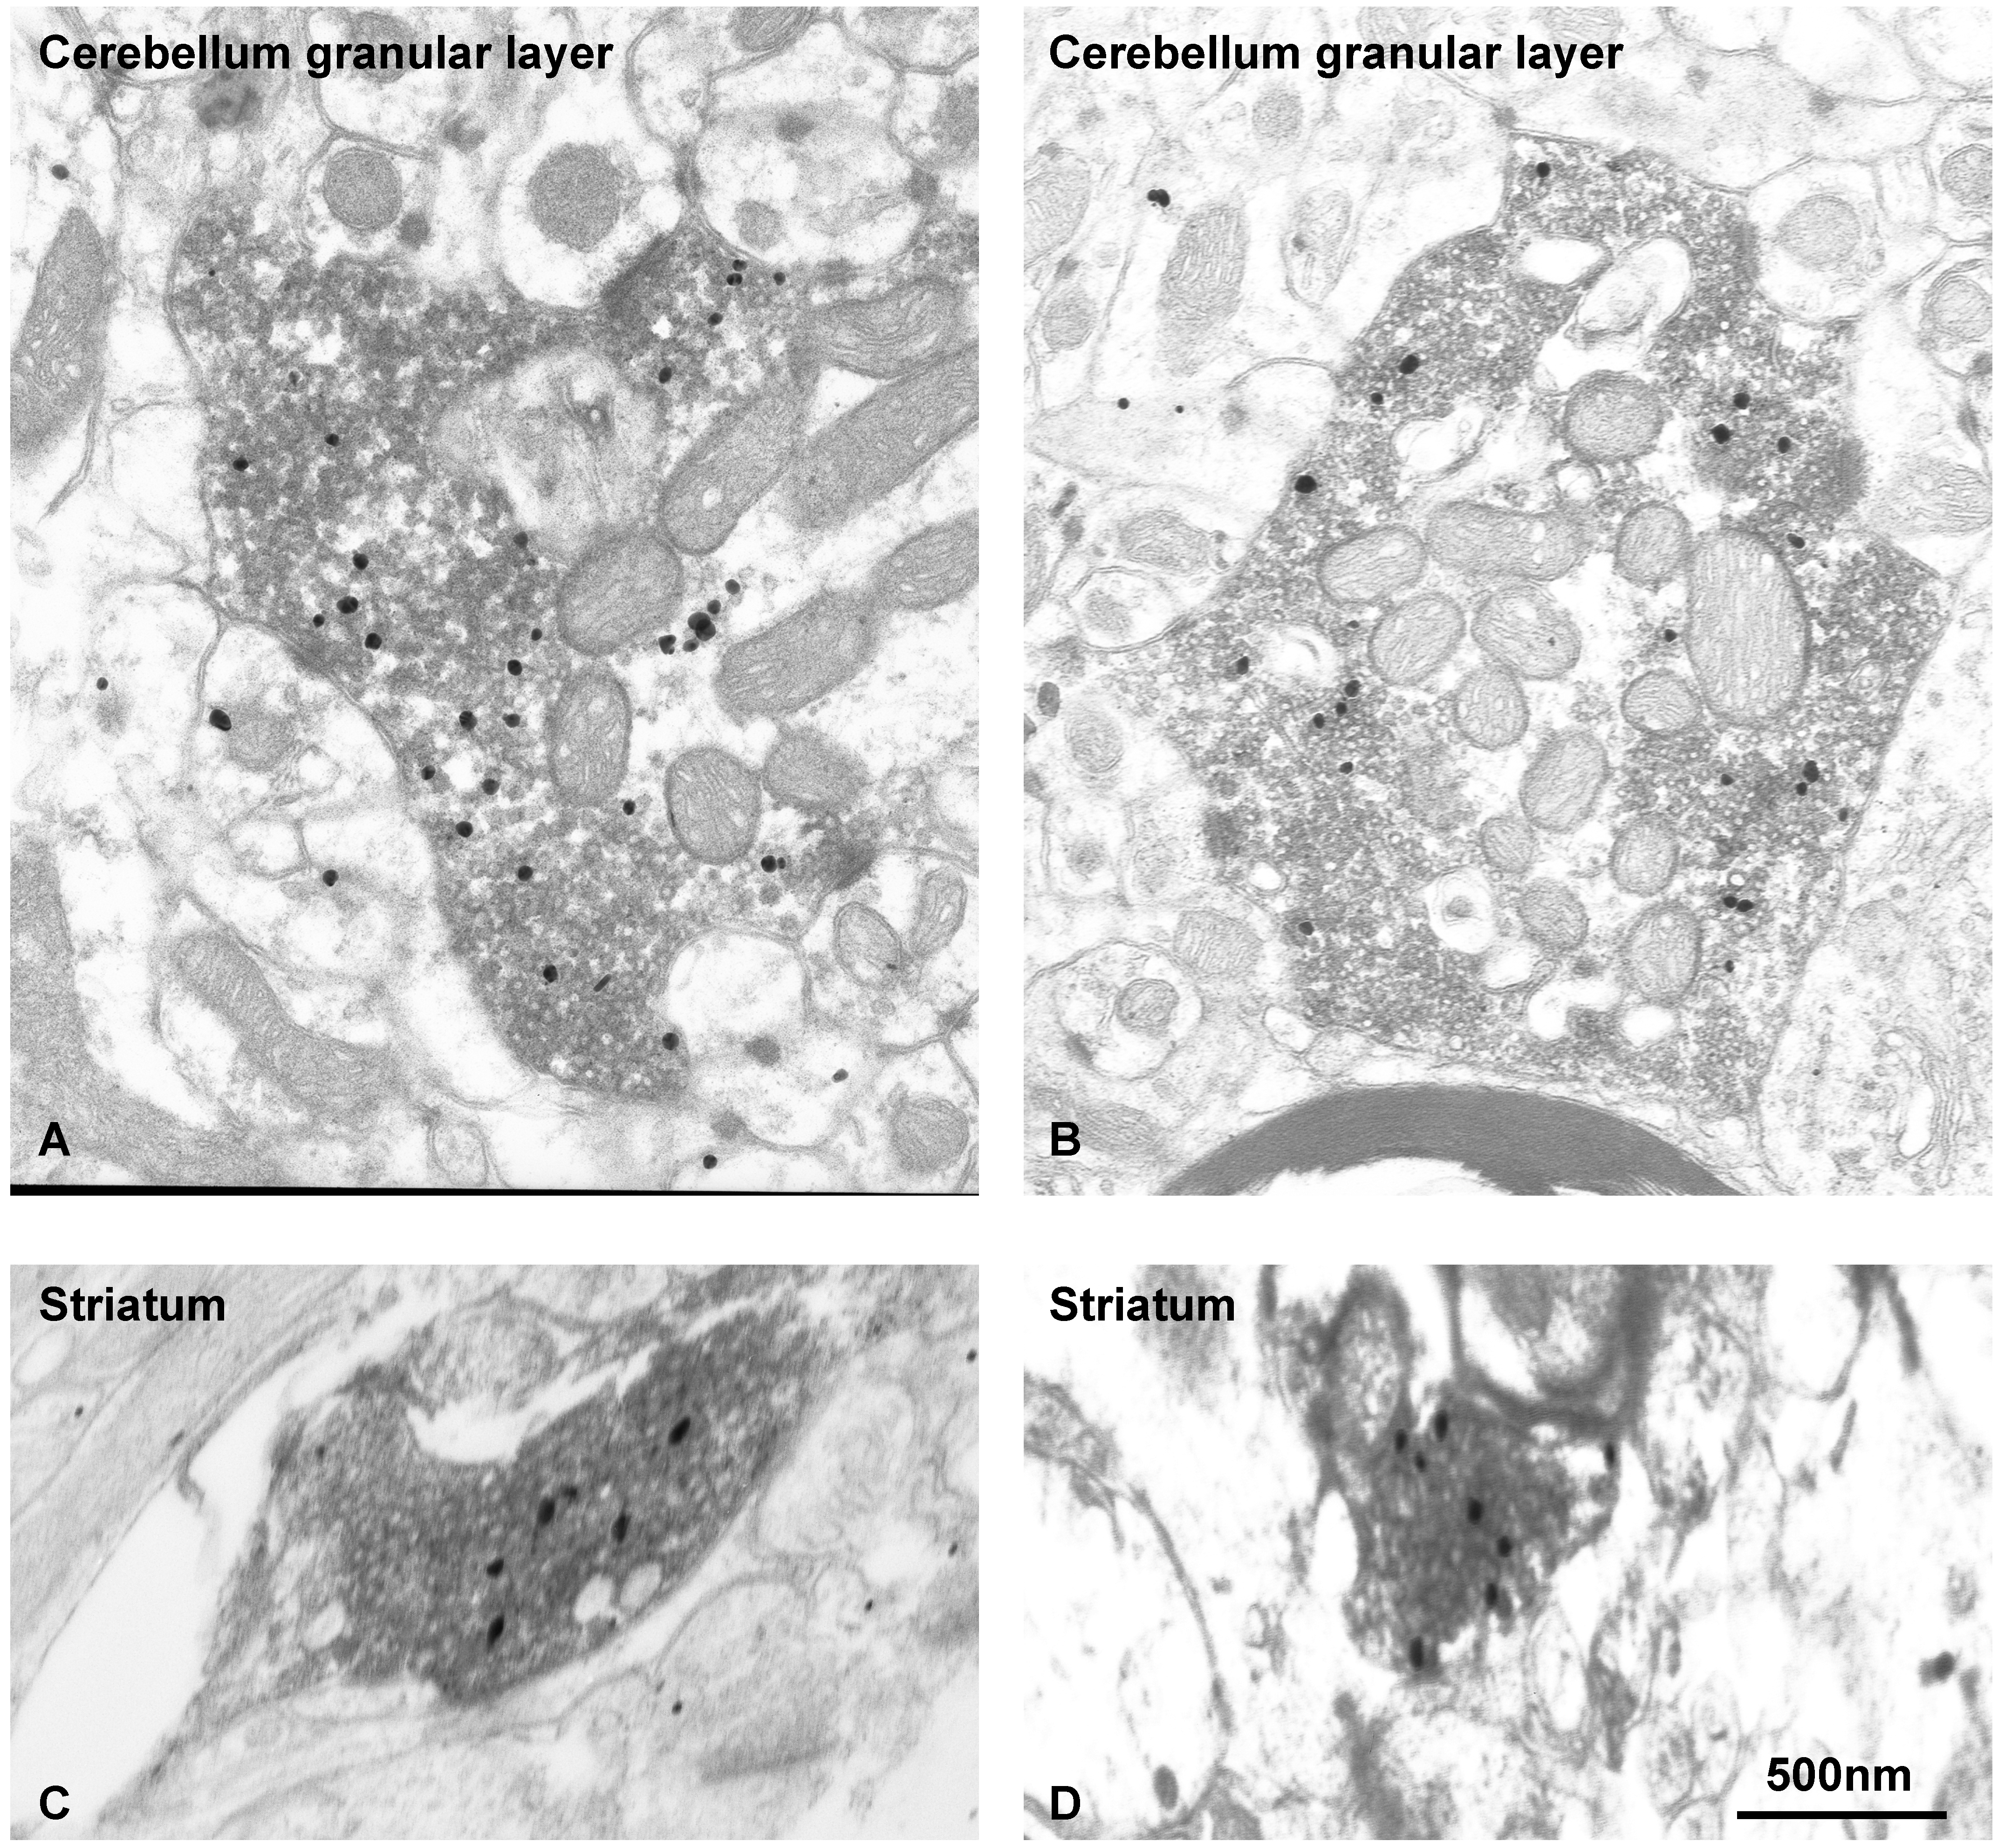

Supplement: supp [file elife-50401-supp-v1.zip › elife_poa_e50401_Figure_5_figure_supplement_1.tif]

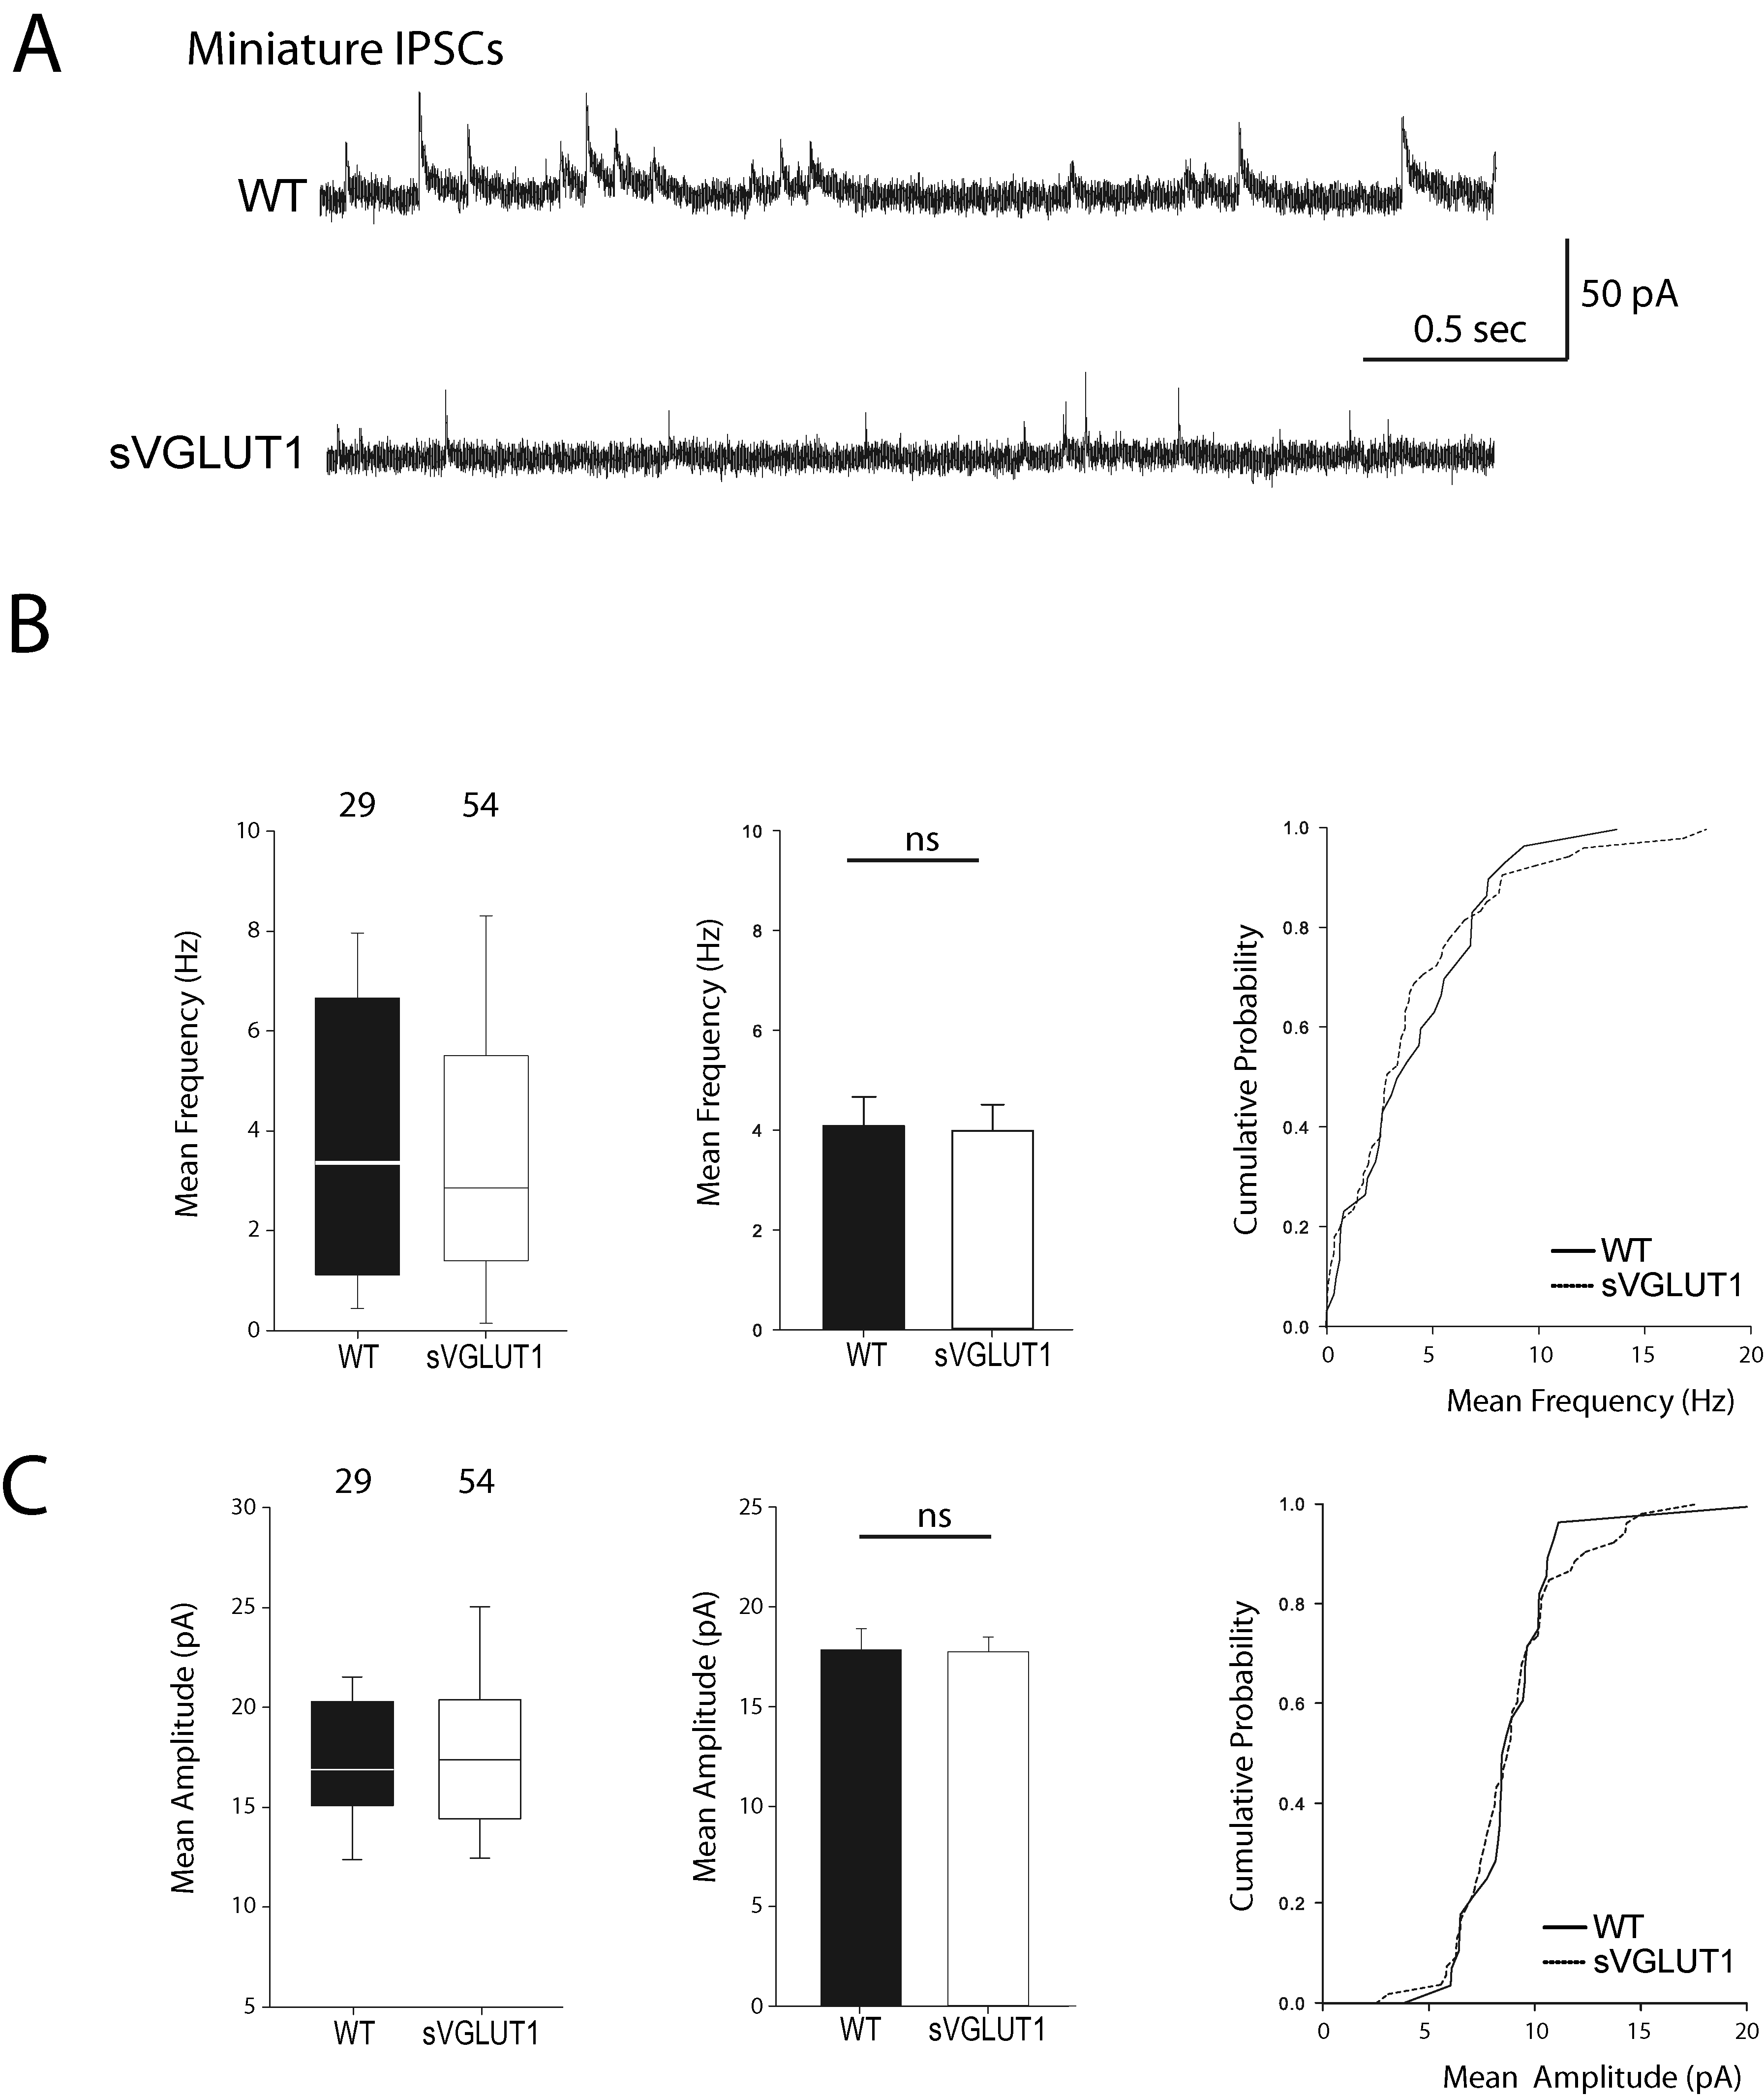

Supplement: supp [file elife-50401-supp-v1.zip › elife_poa_e50401_Figure_3_figure_supplement_2.tif]

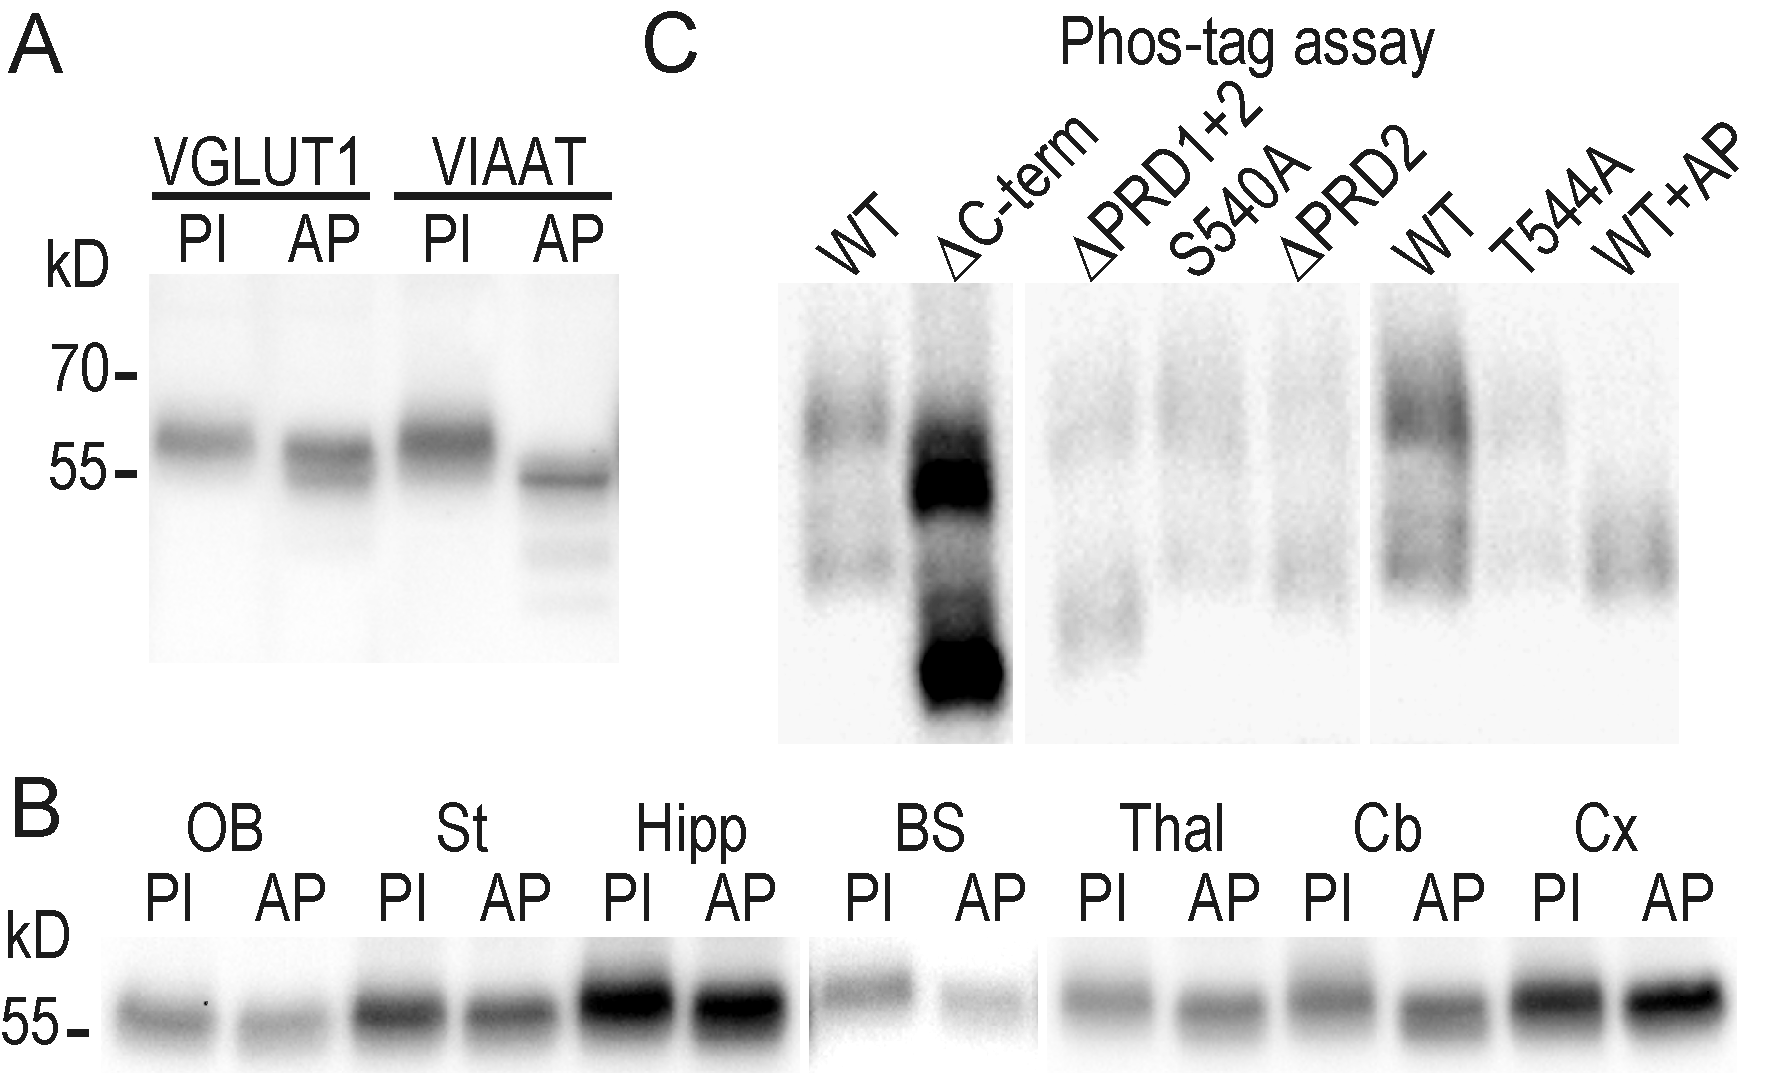

Supplement: supp [file elife-50401-supp-v1.zip › elife_poa_e50401_Figure_4_figure_supplement_1.tif]

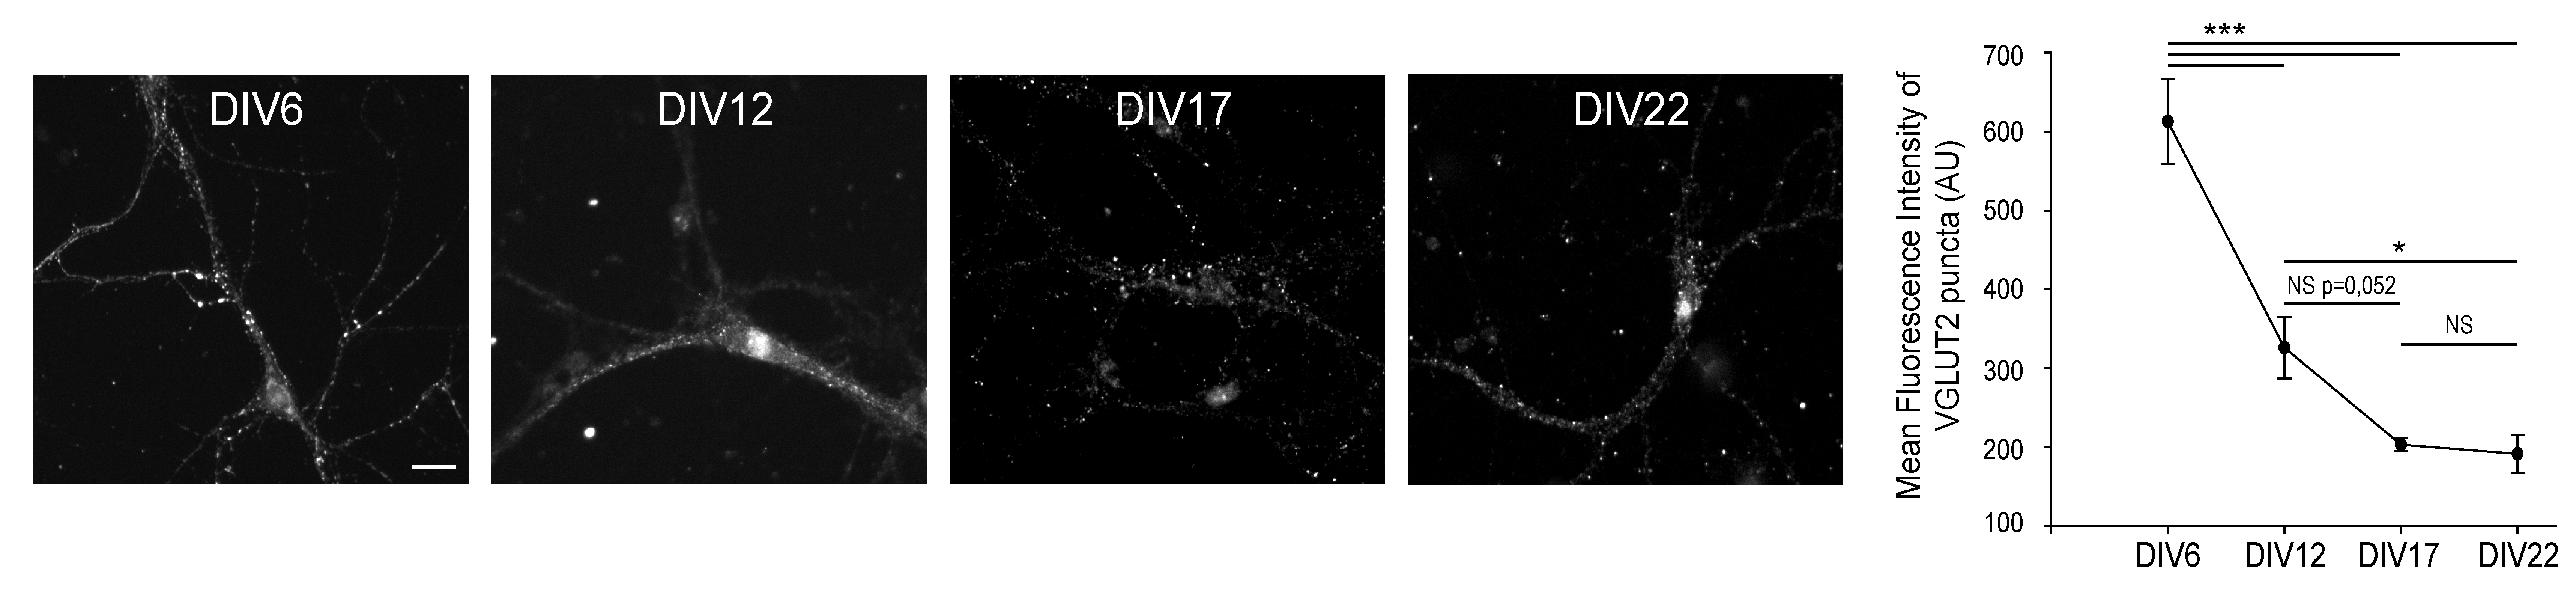

Supplement: supp [file elife-50401-supp-v1.zip › elife_poa_e50401_Figure_3_figure_supplement_1.tif]
